# Supplementary material for: MicroRNAs Involved in the Therapeutic Functions of Noni (Morinda citrifolia L.) Fruit Juice in the Treatment of Acute Gouty Arthritis in Mice Induced with Monosodium Urate
Source: Foods. 2021 Jul 15;10(7):1638. doi: 10.3390/foods10071638 (PMC8308103; doi:10.3390/foods10071638)
Supplement: Supplementary file 1 [file foods-10-01638-s001.zip]

Archive with 9 entries (9 files):
- Figure S1.pdf
- Figure S2.pdf
- Figure S3.pdf
- Table S1.xls
- Table S2.xlsx
- Table S3.xls
- Table S4.xlsx
- Table S5.xlsx
- Table S6.xlsx
