# Supplementary material for: MicroRNAs Involved in the Therapeutic Functions of Noni (Morinda citrifolia L.) Fruit Juice in the Treatment of Acute Gouty Arthritis in Mice Induced with Monosodium Urate
Source: Foods. 2021 Jul 15;10(7):1638. doi: 10.3390/foods10071638 (PMC8308103; doi:10.3390/foods10071638)
Supplement: Supplementary file 1 [file foods-10-01638-s001.zip › Table S1.xls]

## Sheet: Table S1-normal control group
sRNA id	Count	Type	Description
mmu_piR_012511	1	piRNA	mmu_piR_012511
mmu-miR-141-3p	152	hairpin	mir-8
mmu_piR_007729	14	piRNA	mmu_piR_007729
mmu_piR_009642	1	piRNA	mmu_piR_009642
mmu-miR-1843a-5p	22	mature	mir-1843
mmu_piR_021585	1	piRNA	mmu_piR_021585
mmu-miR-378a-3p	1066	mature	mir-378
mmu_piR_028004	1	piRNA	mmu_piR_028004
mmu_piR_032526	4	piRNA	mmu_piR_032526
mmu_piR_020650	1	piRNA	mmu_piR_020650
mmu_piR_022976	4	piRNA	mmu_piR_022976
mmu_piR_003891	1	piRNA	mmu_piR_003891
mmu_piR_000403	1	piRNA	mmu_piR_000403
mmu_piR_015098	1	piRNA	mmu_piR_015098
mmu_piR_000180	22	piRNA	mmu_piR_000180
mmu_piR_022698	1	piRNA	mmu_piR_022698
mmu-miR-465b-5p	1	hairpin	mir-465
mmu_piR_026492	1	piRNA	mmu_piR_026492
mmu_piR_010677	3	piRNA	mmu_piR_010677
mmu_piR_000159	197	piRNA	mmu_piR_000159
mmu-miR-1930-5p	23	hairpin	undef
mmu_piR_029185	1	piRNA	mmu_piR_029185
mmu_piR_001990	1	piRNA	mmu_piR_001990
mmu_piR_001016	1	piRNA	mmu_piR_001016
mmu_piR_000026	1	piRNA	mmu_piR_000026
mmu_piR_031587	1	piRNA	mmu_piR_031587
mmu-miR-3064-5p	33	hairpin	mir-3064
mmu-miR-130a-3p	248	mature	mir-130
mmu_piR_037363	2	piRNA	mmu_piR_037363
mmu_piR_020993	1	piRNA	mmu_piR_020993
mmu_piR_037417	1	piRNA	mmu_piR_037417
mmu-miR-5620-5p	1	mature	undef
mmu-miR-17-5p	103	mature	mir-17
mmu_piR_020333	1	piRNA	mmu_piR_020333
mmu_piR_016024	1	piRNA	mmu_piR_016024
mmu-miR-28a-3p	58	mature	mir-28
mmu_piR_018299	1	piRNA	mmu_piR_018299
mmu-miR-485-5p	37	mature	mir-485
mmu_piR_038365	1	piRNA	mmu_piR_038365
mmu_piR_014939	1	piRNA	mmu_piR_014939
mmu-miR-6904-5p	2	hairpin	undef
mmu_piR_030776	5	piRNA	mmu_piR_030776
mmu-miR-5134-3p	26	hairpin	undef
mmu_piR_029123	1	piRNA	mmu_piR_029123
mmu_piR_009064	1	piRNA	mmu_piR_009064
mmu-miR-215-5p	605	mature	mir-192
mmu_piR_024385	1	piRNA	mmu_piR_024385
mmu_piR_002998	1	piRNA	mmu_piR_002998
mmu_piR_008802	1	piRNA	mmu_piR_008802
mmu-miR-7658-3p	44	hairpin	undef
mmu-miR-375-3p	4474	mature	mir-375
mmu_piR_034485	309	piRNA	mmu_piR_034485
mmu-miR-6967-3p	2	mature	mir-6967
mmu-miR-379-5p	68	mature	mir-379
mmu-miR-9b-3p	1408	mature	undef
mmu-miR-6236	1	hairpin	undef
mmu_piR_001456	1	piRNA	mmu_piR_001456
mmu-miR-199a-3p,mmu-miR-199b-3p	26	mature	mir-199
mmu_piR_029329	2	piRNA	mmu_piR_029329
mmu-miR-467a-3p	21	mature	mir-467
mmu_piR_032018	2	piRNA	mmu_piR_032018
mmu_piR_035926	1	piRNA	mmu_piR_035926
mmu-let-7f-5p	4089	mature	let-7
mmu_piR_028938	1	piRNA	mmu_piR_028938
mmu_piR_006804	1	piRNA	mmu_piR_006804
mmu_piR_037155	1	piRNA	mmu_piR_037155
mmu_piR_027931	2	piRNA	mmu_piR_027931
mmu_piR_039652	1	piRNA	mmu_piR_039652
mmu_piR_000768	14	piRNA	mmu_piR_000768
mmu_piR_009877	1	piRNA	mmu_piR_009877
mmu-miR-129-5p	1	hairpin	mir-129
mmu-miR-30e-3p	49	hairpin	mir-30
mmu_piR_007870	1	piRNA	mmu_piR_007870
mmu-miR-34a-5p	103	hairpin	mir-34
mmu_piR_014422	1	piRNA	mmu_piR_014422
mmu_piR_029496	1	piRNA	mmu_piR_029496
mmu_piR_010585	1	piRNA	mmu_piR_010585
mmu_piR_025576	142	piRNA	mmu_piR_025576
mmu_piR_007389	1	piRNA	mmu_piR_007389
mmu_piR_002617	1	piRNA	mmu_piR_002617
mmu_piR_013616	3	piRNA	mmu_piR_013616
mmu_piR_024987	29	piRNA	mmu_piR_024987
mmu_piR_039114	71	piRNA	mmu_piR_039114
mmu_piR_037165	79	piRNA	mmu_piR_037165
mmu_piR_035804	1	piRNA	mmu_piR_035804
mmu-miR-1191a	116	hairpin	undef
mmu_piR_033233	1	piRNA	mmu_piR_033233
mmu_piR_029178	1	piRNA	mmu_piR_029178
mmu-miR-6943-3p	5	hairpin	undef
mmu-miR-350-3p	267	mature	mir-350
mmu-miR-495-3p	23	hairpin	mir-329
mmu-miR-27a-3p	160834	hairpin	mir-27
mmu_piR_009930	1	piRNA	mmu_piR_009930
mmu_piR_038428	886	piRNA	mmu_piR_038428
mmu_piR_012829	768	piRNA	mmu_piR_012829
mmu_piR_015972	2	piRNA	mmu_piR_015972
mmu-miR-376b-5p	17	hairpin	mir-368
mmu-miR-3074-2-3p	60	hairpin	mir-3074
mmu_piR_002643	672	piRNA	mmu_piR_002643
mmu-miR-5113	60	hairpin	undef
mmu_piR_028795	1	piRNA	mmu_piR_028795
mmu-miR-322-3p	88	hairpin	mir-322
mmu_piR_014183	8	piRNA	mmu_piR_014183
mmu_piR_019300	8	piRNA	mmu_piR_019300
mmu-miR-877-5p	28	hairpin	mir-877
mmu_piR_021279	1	piRNA	mmu_piR_021279
mmu_piR_005988	2	piRNA	mmu_piR_005988
mmu-miR-210-3p	90	hairpin	mir-210
mmu_piR_022891	1	piRNA	mmu_piR_022891
mmu_piR_004493	1	piRNA	mmu_piR_004493
mmu_piR_009766	1	piRNA	mmu_piR_009766
mmu-miR-542-5p	103	mature	mir-542
mmu-miR-429-3p	638	mature	mir-8
mmu_piR_000590	1	piRNA	mmu_piR_000590
mmu_piR_032815	1	piRNA	mmu_piR_032815
mmu-miR-10b-5p	516	mature	mir-10
mmu-miR-139-5p	1200	hairpin	mir-139
mmu_piR_016232	27	piRNA	mmu_piR_016232
mmu_piR_002957	1	piRNA	mmu_piR_002957
mmu_piR_013018	1	piRNA	mmu_piR_013018
mmu-miR-487b-3p	26	mature	mir-154
mmu_piR_035678	1	piRNA	mmu_piR_035678
mmu_piR_015546	44	piRNA	mmu_piR_015546
mmu_piR_013252	2	piRNA	mmu_piR_013252
mmu_piR_011282	1	piRNA	mmu_piR_011282
mmu-miR-484	2157	mature	mir-484
mmu-miR-224-5p	77	mature	mir-224
mmu-miR-181b-5p	104	hairpin	mir-181
mmu_piR_001433	1	piRNA	mmu_piR_001433
mmu_piR_032109	1	piRNA	mmu_piR_032109
mmu-miR-9-3p	39	mature	mir-9
mmu_piR_027093	1	piRNA	mmu_piR_027093
mmu_piR_001323	1	piRNA	mmu_piR_001323
mmu_piR_037640	8	piRNA	mmu_piR_037640
mmu-miR-184-3p	82	mature	mir-184
mmu_piR_023562	1	piRNA	mmu_piR_023562
mmu-miR-470-5p	13	mature	mir-743
mmu_piR_035294	7	piRNA	mmu_piR_035294
mmu-miR-25-3p	8034	hairpin	mir-25
mmu_piR_011623	1	piRNA	mmu_piR_011623
mmu-miR-181d-3p	3	mature	mir-181
mmu-miR-15a-3p	18	mature	mir-15
mmu-miR-221-3p	30	mature	mir-221
mmu-miR-20a-5p	159	mature	mir-17
mmu_piR_010658	1	piRNA	mmu_piR_010658
mmu_piR_012160	1	piRNA	mmu_piR_012160
mmu_piR_010894	1	piRNA	mmu_piR_010894
mmu-miR-466i-5p	153	hairpin	mir-467
mmu-miR-8116	54	mature	undef
mmu-miR-5114	3	hairpin	undef
mmu-miR-7091-5p	35	hairpin	undef
mmu-miR-33-5p	55	hairpin	mir-33
mmu-miR-8112	190	hairpin	undef
mmu_piR_006690	1	piRNA	mmu_piR_006690
mmu-miR-7a-5p	828	hairpin	mir-7
mmu_piR_025310	1	piRNA	mmu_piR_025310
mmu-miR-200c-3p	29	hairpin	mir-8
mmu-miR-205-5p	60	hairpin	mir-205
mmu_piR_018155	1	piRNA	mmu_piR_018155
mmu-miR-1839-5p	544	mature	mir-1839
mmu_piR_021628	1	piRNA	mmu_piR_021628
mmu_piR_013071	1	piRNA	mmu_piR_013071
mmu-miR-672-3p	1	mature	mir-672
mmu_piR_012531	1	piRNA	mmu_piR_012531
mmu_piR_008147	1	piRNA	mmu_piR_008147
mmu_piR_020516	3	piRNA	mmu_piR_020516
mmu-miR-186-5p	1	hairpin	mir-186
mmu_piR_002717	1	piRNA	mmu_piR_002717
mmu-miR-150-3p	49	hairpin	mir-150
mmu_piR_002043	1	piRNA	mmu_piR_002043
mmu_piR_018895	7	piRNA	mmu_piR_018895
mmu_piR_019765	1	piRNA	mmu_piR_019765
mmu-miR-10a-5p	386	hairpin	mir-10
mmu_piR_023065	1	piRNA	mmu_piR_023065
mmu-miR-434-3p	188	hairpin	mir-434
mmu_piR_019588	1	piRNA	mmu_piR_019588
mmu_piR_024269	1	piRNA	mmu_piR_024269
mmu_piR_039312	2	piRNA	mmu_piR_039312
mmu_piR_015127	48	piRNA	mmu_piR_015127
mmu-miR-199a-5p	1	hairpin	mir-199
mmu_piR_039759	1	piRNA	mmu_piR_039759
mmu_piR_034427	1	piRNA	mmu_piR_034427
mmu_piR_002368	1	piRNA	mmu_piR_002368
mmu_piR_022581	1	piRNA	mmu_piR_022581
mmu-miR-421-3p	84	hairpin	mir-95
mmu_piR_011904	1	piRNA	mmu_piR_011904
mmu-miR-19b-3p	1336	hairpin	mir-19
mmu-miR-449a-5p	180	mature	mir-449
mmu-miR-92a-3p	103494	hairpin	mir-25
mmu_piR_035344	2	piRNA	mmu_piR_035344
mmu_piR_000935	11657	piRNA	mmu_piR_000935
mmu_piR_035946	1	piRNA	mmu_piR_035946
mmu-miR-139-3p	24	mature	mir-139
mmu-miR-7075-3p	15	hairpin	undef
mmu_piR_033258	1	piRNA	mmu_piR_033258
mmu_piR_034973	1	piRNA	mmu_piR_034973
mmu-miR-433-3p	2	mature	mir-433
mmu_piR_026429	1	piRNA	mmu_piR_026429
mmu_piR_003947	1	piRNA	mmu_piR_003947
mmu-miR-669a-5p,mmu-miR-669p-5p	13	mature	mir-467
mmu-let-7f-2-3p	850	hairpin	let-7
mmu-miR-181a-5p	2421	hairpin	mir-181
mmu-miR-215-3p	97	mature	mir-192
mmu-miR-34a-5p	690	mature	mir-34
mmu_piR_023635	1	piRNA	mmu_piR_023635
mmu-miR-1a-3p	116	mature	mir-1
mmu-miR-669b-5p	28	hairpin	mir-467
mmu-miR-741-3p	1	mature	undef
mmu_piR_016842	1	piRNA	mmu_piR_016842
mmu_piR_005249	2	piRNA	mmu_piR_005249
mmu_piR_000724	1	piRNA	mmu_piR_000724
mmu-miR-211-5p	2	mature	mir-204
mmu_piR_017508	1390	piRNA	mmu_piR_017508
mmu_piR_038967	1	piRNA	mmu_piR_038967
mmu_piR_006955	4	piRNA	mmu_piR_006955
mmu_piR_021460	2	piRNA	mmu_piR_021460
mmu-miR-411-5p	78	hairpin	mir-379
mmu-miR-93-5p	2552	mature	mir-17
mmu_piR_015015	1	piRNA	mmu_piR_015015
mmu_piR_039716	1	piRNA	mmu_piR_039716
mmu_piR_026716	1	piRNA	mmu_piR_026716
mmu-miR-324-3p	1	mature	mir-324
mmu-miR-190b-5p	20	hairpin	mir-190
mmu-miR-133a-3p	813	hairpin	mir-133
mmu_piR_038105	1	piRNA	mmu_piR_038105
mmu_piR_018369	1	piRNA	mmu_piR_018369
mmu_piR_030396	249	piRNA	mmu_piR_030396
mmu_piR_003954	1	piRNA	mmu_piR_003954
mmu-miR-486b-3p	81	hairpin	mir-486
mmu-miR-339-3p	54	mature	mir-339
mmu-miR-151-3p	180	mature	mir-28
mmu_piR_022684	2	piRNA	mmu_piR_022684
mmu-miR-574-5p	371	hairpin	mir-574
mmu-miR-669a-3p,mmu-miR-669o-3p	81	hairpin	mir-467
mmu_piR_024101	1	piRNA	mmu_piR_024101
mmu-miR-433-3p	1	hairpin	mir-433
mmu-miR-709	55	hairpin	undef
mmu_piR_014609	1	piRNA	mmu_piR_014609
mmu_piR_036741	1	piRNA	mmu_piR_036741
mmu_piR_029225	1	piRNA	mmu_piR_029225
mmu_piR_004473	1	piRNA	mmu_piR_004473
mmu-miR-7069-3p	34	hairpin	undef
mmu_piR_016337	1	piRNA	mmu_piR_016337
mmu_piR_013011	3	piRNA	mmu_piR_013011
mmu_piR_004658	120	piRNA	mmu_piR_004658
mmu_piR_037234	2	piRNA	mmu_piR_037234
mmu_piR_039463	2	piRNA	mmu_piR_039463
mmu-miR-664-3p	127	hairpin	mir-664
mmu_piR_013168	1	piRNA	mmu_piR_013168
mmu-miR-183-5p	79	mature	mir-183
mmu_piR_035505	1	piRNA	mmu_piR_035505
mmu_piR_009944	2	piRNA	mmu_piR_009944
mmu_piR_005196	1	piRNA	mmu_piR_005196
mmu-miR-29a-3p	6476	hairpin	mir-29
mmu_piR_025433	2	piRNA	mmu_piR_025433
mmu-miR-3100-3p	1	hairpin	undef
mmu_piR_022515	1	piRNA	mmu_piR_022515
mmu_piR_005323	1	piRNA	mmu_piR_005323
mmu-miR-423-3p	2493	hairpin	mir-423
mmu_piR_033569	1	piRNA	mmu_piR_033569
mmu_piR_013451	1	piRNA	mmu_piR_013451
mmu_piR_014919	21	piRNA	mmu_piR_014919
mmu_piR_033646	1189	piRNA	mmu_piR_033646
mmu_piR_024839	1	piRNA	mmu_piR_024839
mmu_piR_007432	6	piRNA	mmu_piR_007432
mmu-miR-16-5p	6238	hairpin	mir-15
mmu-miR-7b-5p	420	hairpin	mir-7
mmu-miR-301a-3p	174	mature	mir-130
mmu_piR_005312	1	piRNA	mmu_piR_005312
mmu-miR-486a-3p	334	mature	mir-486
mmu_piR_006654	1	piRNA	mmu_piR_006654
mmu-miR-5114	27	mature	undef
mmu_piR_012351	2	piRNA	mmu_piR_012351
mmu-miR-297a-5p	11	mature	mir-297
mmu_piR_000414	2	piRNA	mmu_piR_000414
mmu_piR_001438	1	piRNA	mmu_piR_001438
mmu_piR_019672	2	piRNA	mmu_piR_019672
mmu-miR-12197-3p	3	hairpin	undef
mmu_piR_023761	1	piRNA	mmu_piR_023761
mmu_piR_008746	1	piRNA	mmu_piR_008746
mmu_piR_011730	1	piRNA	mmu_piR_011730
mmu_piR_010171	1	piRNA	mmu_piR_010171
mmu_piR_024715	1	piRNA	mmu_piR_024715
mmu-miR-335-5p	38	mature	mir-335
mmu_piR_010266	1	piRNA	mmu_piR_010266
mmu-miR-7052-3p	43	mature	undef
mmu-let-7i-5p	21954	hairpin	let-7
mmu-miR-142a-3p	42	hairpin	mir-142
mmu_piR_034282	1	piRNA	mmu_piR_034282
mmu_piR_014623	33	piRNA	mmu_piR_014623
mmu-miR-3960	185	hairpin	mir-3960
mmu_piR_001427	1	piRNA	mmu_piR_001427
mmu-miR-495-3p	1	mature	mir-329
mmu-miR-138-2-3p	1	hairpin	mir-138
mmu-miR-425-5p	147	mature	mir-425
mmu-miR-130b-3p	223	mature	mir-130
mmu_piR_018824	1	piRNA	mmu_piR_018824
mmu-miR-486a-5p,mmu-miR-486b-5p	15577	hairpin	mir-486
mmu-miR-127-3p	393	mature	mir-127
mmu_piR_008047	1	piRNA	mmu_piR_008047
mmu-miR-195a-5p	31	mature	mir-15
mmu_piR_036227	1	piRNA	mmu_piR_036227
mmu_piR_019668	1	piRNA	mmu_piR_019668
mmu_piR_000068	1	piRNA	mmu_piR_000068
mmu-miR-99a-3p	24	hairpin	mir-10
mmu-miR-6941-3p	1	hairpin	undef
mmu_piR_036799	1	piRNA	mmu_piR_036799
mmu_piR_009884	1	piRNA	mmu_piR_009884
mmu_piR_026808	1	piRNA	mmu_piR_026808
mmu_piR_020165	1	piRNA	mmu_piR_020165
mmu_piR_019200	16	piRNA	mmu_piR_019200
mmu-miR-676-3p	330	hairpin	mir-676
mmu-miR-224-5p	29	hairpin	mir-224
mmu_piR_001821	2	piRNA	mmu_piR_001821
mmu_piR_011225	7	piRNA	mmu_piR_011225
mmu_piR_021257	1	piRNA	mmu_piR_021257
mmu_piR_017872	1	piRNA	mmu_piR_017872
mmu-miR-369-5p	117	hairpin	mir-154
mmu_piR_009333	1	piRNA	mmu_piR_009333
mmu_piR_020767	2	piRNA	mmu_piR_020767
mmu-miR-484	1603	hairpin	mir-484
mmu-let-7d-3p	3651	mature	let-7
mmu_piR_035191	1	piRNA	mmu_piR_035191
mmu-miR-30b-5p	1170	mature	mir-30
mmu_piR_001799	1	piRNA	mmu_piR_001799
mmu-miR-141-3p	98	mature	mir-8
mmu_piR_034411	18	piRNA	mmu_piR_034411
mmu_piR_020120	297	piRNA	mmu_piR_020120
mmu-miR-139-3p	3	hairpin	mir-139
mmu_piR_021292	2	piRNA	mmu_piR_021292
mmu_piR_002606	1	piRNA	mmu_piR_002606
mmu-miR-16-2-3p	1	hairpin	mir-15
mmu_piR_001895	1	piRNA	mmu_piR_001895
mmu_piR_036514	1	piRNA	mmu_piR_036514
mmu-miR-6914-3p	25	mature	undef
mmu_piR_039317	2	piRNA	mmu_piR_039317
mmu_piR_029201	1	piRNA	mmu_piR_029201
mmu_piR_032249	1	piRNA	mmu_piR_032249
mmu_piR_014930	2	piRNA	mmu_piR_014930
mmu_piR_031831	1	piRNA	mmu_piR_031831
mmu_piR_023084	1	piRNA	mmu_piR_023084
mmu_piR_005615	1	piRNA	mmu_piR_005615
mmu_piR_014048	1	piRNA	mmu_piR_014048
mmu_piR_018257	1	piRNA	mmu_piR_018257
mmu_piR_037320	1	piRNA	mmu_piR_037320
mmu_piR_012023	1	piRNA	mmu_piR_012023
mmu-miR-21a-5p	5831	mature	mir-21
mmu_piR_008790	1	piRNA	mmu_piR_008790
mmu_piR_028464	2	piRNA	mmu_piR_028464
mmu-let-7d-5p	1527	mature	let-7
mmu-miR-23b-3p	6	mature	mir-23
mmu-miR-98-5p	333	mature	let-7
mmu-miR-24-2-5p	106	mature	mir-24
mmu-miR-411-5p	42	mature	mir-379
mmu_piR_010732	1	piRNA	mmu_piR_010732
mmu_piR_002208	3	piRNA	mmu_piR_002208
mmu-miR-182-5p	4	hairpin	mir-182
mmu-miR-702-3p	1	hairpin	mir-702
mmu_piR_021669	1	piRNA	mmu_piR_021669
mmu_piR_022789	1	piRNA	mmu_piR_022789
mmu-miR-7117-3p	23	hairpin	undef
mmu_piR_037633	1	piRNA	mmu_piR_037633
mmu_piR_033274	1	piRNA	mmu_piR_033274
mmu-miR-12192-5p	36	mature	undef
mmu-miR-96-5p	1	hairpin	mir-96
mmu_piR_025270	1	piRNA	mmu_piR_025270
mmu_piR_017405	87	piRNA	mmu_piR_017405
mmu_piR_031465	1	piRNA	mmu_piR_031465
mmu_piR_000540	1	piRNA	mmu_piR_000540
mmu_piR_003177	1	piRNA	mmu_piR_003177
mmu-miR-193a-5p	15	hairpin	mir-193
mmu-miR-124-3p	35	mature	mir-124
mmu-miR-322-5p	969	hairpin	mir-322
mmu-miR-342-3p	1591	hairpin	mir-342
mmu-miR-219a-5p	1	hairpin	mir-219
mmu-miR-106b-5p	178	mature	mir-17
mmu_piR_033193	1	piRNA	mmu_piR_033193
mmu-miR-181d-3p	514	hairpin	mir-181
mmu_piR_009943	2	piRNA	mmu_piR_009943
mmu_piR_029535	1	piRNA	mmu_piR_029535
mmu_piR_008244	1	piRNA	mmu_piR_008244
mmu_piR_038869	1	piRNA	mmu_piR_038869
mmu_piR_038555	1	piRNA	mmu_piR_038555
mmu_piR_020112	1	piRNA	mmu_piR_020112
mmu_piR_021058	1	piRNA	mmu_piR_021058
mmu_piR_026282	1	piRNA	mmu_piR_026282
mmu-miR-361-5p	110	hairpin	mir-361
mmu_piR_038147	3	piRNA	mmu_piR_038147
mmu_piR_026351	2	piRNA	mmu_piR_026351
mmu-miR-466i-5p	92	mature	mir-467
mmu_piR_027178	322	piRNA	mmu_piR_027178
mmu-miR-92b-3p	731	mature	mir-25
mmu-miR-6395	2	hairpin	undef
mmu-miR-24-2-5p	2	hairpin	mir-24
mmu_piR_034829	3	piRNA	mmu_piR_034829
mmu-miR-203b-3p	43	mature	undef
mmu_piR_013435	1	piRNA	mmu_piR_013435
mmu_piR_030605	1	piRNA	mmu_piR_030605
mmu_piR_012562	63	piRNA	mmu_piR_012562
mmu_piR_013830	1	piRNA	mmu_piR_013830
mmu_piR_015170	1	piRNA	mmu_piR_015170
mmu_piR_016952	5	piRNA	mmu_piR_016952
mmu_piR_024218	1	piRNA	mmu_piR_024218
mmu-let-7i-5p	10887	mature	let-7
mmu_piR_013386	1	piRNA	mmu_piR_013386
mmu-miR-142a-5p	57	hairpin	mir-142
mmu-miR-27a-3p	16108	mature	mir-27
mmu-miR-3470a	2	hairpin	mir-3470
mmu_piR_013382	3	piRNA	mmu_piR_013382
mmu_piR_026778	1	piRNA	mmu_piR_026778
mmu_piR_017921	1	piRNA	mmu_piR_017921
mmu_piR_003040	6	piRNA	mmu_piR_003040
mmu-miR-652-5p	1	hairpin	mir-652
mmu_piR_010303	2	piRNA	mmu_piR_010303
mmu-miR-6982-5p	2	hairpin	undef
mmu-miR-181c-5p	431	mature	mir-181
mmu_piR_004114	1	piRNA	mmu_piR_004114
mmu_piR_039898	1	piRNA	mmu_piR_039898
mmu_piR_016752	2	piRNA	mmu_piR_016752
mmu-miR-22-3p	6905	mature	mir-22
mmu_piR_010309	179	piRNA	mmu_piR_010309
mmu_piR_016196	2	piRNA	mmu_piR_016196
mmu_piR_033372	1	piRNA	mmu_piR_033372
mmu-miR-497a-5p	72	hairpin	mir-497
mmu_piR_038667	1	piRNA	mmu_piR_038667
mmu_piR_038940	2	piRNA	mmu_piR_038940
mmu-miR-320-3p	2300	hairpin	mir-320
mmu-miR-29c-3p	159	hairpin	mir-29
mmu-miR-6976-3p	1	hairpin	undef
mmu_piR_019702	1	piRNA	mmu_piR_019702
mmu_piR_004374	5	piRNA	mmu_piR_004374
mmu_piR_005465	1	piRNA	mmu_piR_005465
mmu_piR_029621	1	piRNA	mmu_piR_029621
mmu-miR-184-3p	1230	hairpin	mir-184
mmu_piR_024749	7	piRNA	mmu_piR_024749
mmu_piR_013384	1	piRNA	mmu_piR_013384
mmu_piR_034749	1	piRNA	mmu_piR_034749
mmu-miR-465b-5p	3	mature	mir-465
mmu-miR-212-3p	78	mature	mir-132
mmu-miR-451a	100927	mature	mir-451
mmu-miR-199a-3p,mmu-miR-199b-3p	9269	hairpin	mir-199
mmu_piR_035357	1	piRNA	mmu_piR_035357
mmu_piR_017770	1	piRNA	mmu_piR_017770
mmu_piR_035564	2	piRNA	mmu_piR_035564
mmu_piR_002656	2	piRNA	mmu_piR_002656
mmu-miR-1839-5p	598	hairpin	mir-1839
mmu_piR_031489	1	piRNA	mmu_piR_031489
mmu-miR-6975-3p	12	hairpin	undef
mmu_piR_010921	1	piRNA	mmu_piR_010921
mmu_piR_026378	1	piRNA	mmu_piR_026378
mmu_piR_017858	1	piRNA	mmu_piR_017858
mmu_piR_012063	1	piRNA	mmu_piR_012063
mmu-miR-6993-3p	41	hairpin	undef
mmu_piR_029411	24	piRNA	mmu_piR_029411
mmu-miR-206-3p	792	mature	mir-1
mmu_piR_006642	1	piRNA	mmu_piR_006642
mmu_piR_001822	1	piRNA	mmu_piR_001822
mmu_piR_014305	1	piRNA	mmu_piR_014305
mmu-miR-221-3p	1172	hairpin	mir-221
mmu_piR_015351	1	piRNA	mmu_piR_015351
mmu_piR_029138	209	piRNA	mmu_piR_029138
mmu_piR_020362	1	piRNA	mmu_piR_020362
mmu_piR_016315	1	piRNA	mmu_piR_016315
mmu-miR-126a-5p	126	hairpin	mir-126
mmu-miR-181d-5p	403	hairpin	mir-181
mmu-miR-128-3p	9200	hairpin	mir-128
mmu-miR-346-5p	3	mature	mir-346
mmu-let-7d-3p	8677	hairpin	let-7
mmu-miR-1191b-3p	32	hairpin	undef
mmu-miR-106b-5p	103	hairpin	mir-17
mmu_piR_033400	1	piRNA	mmu_piR_033400
mmu-miR-5099	3	hairpin	undef
mmu-miR-182-5p	1	mature	mir-182
mmu_piR_016587	1	piRNA	mmu_piR_016587
mmu_piR_009015	1	piRNA	mmu_piR_009015
mmu-miR-21a-3p	66	hairpin	mir-21
mmu_piR_031891	1	piRNA	mmu_piR_031891
mmu_piR_033316	1	piRNA	mmu_piR_033316
mmu_piR_034706	1	piRNA	mmu_piR_034706
mmu-miR-871-5p	3	mature	mir-743
mmu-miR-674-5p	25	hairpin	mir-674
mmu_piR_027739	147	piRNA	mmu_piR_027739
mmu-miR-449a-5p	48	hairpin	mir-449
mmu_piR_036829	1	piRNA	mmu_piR_036829
mmu_piR_038761	533	piRNA	mmu_piR_038761
mmu_piR_039245	1	piRNA	mmu_piR_039245
mmu-miR-338-5p	1	mature	mir-338
mmu-miR-15a-3p	33	hairpin	mir-15
mmu-miR-19a-3p	29	mature	mir-19
mmu-miR-154-5p	26	hairpin	mir-154
mmu_piR_030420	3	piRNA	mmu_piR_030420
mmu_piR_029828	1	piRNA	mmu_piR_029828
mmu-miR-328-5p	72	hairpin	mir-328
mmu-miR-30a-3p	33	mature	mir-30
mmu_piR_028038	1	piRNA	mmu_piR_028038
mmu_piR_021783	1	piRNA	mmu_piR_021783
mmu-miR-154-5p	564	mature	mir-154
mmu-miR-466h-3p	27	hairpin	mir-467
mmu_piR_026083	3	piRNA	mmu_piR_026083
mmu_piR_005675	1	piRNA	mmu_piR_005675
mmu_piR_025700	1	piRNA	mmu_piR_025700
mmu_piR_001219	2	piRNA	mmu_piR_001219
mmu-miR-7a-5p	383	mature	mir-7
mmu-miR-877-3p	41	mature	mir-877
mmu_piR_014118	1	piRNA	mmu_piR_014118
mmu_piR_006857	1	piRNA	mmu_piR_006857
mmu-miR-99a-5p	5670	mature	mir-10
mmu_piR_031545	1	piRNA	mmu_piR_031545
mmu_piR_012095	1	piRNA	mmu_piR_012095
mmu-miR-7051-5p	26	mature	undef
mmu_piR_009380	1	piRNA	mmu_piR_009380
mmu_piR_018584	1	piRNA	mmu_piR_018584
mmu_piR_018995	1	piRNA	mmu_piR_018995
mmu_piR_001291	2	piRNA	mmu_piR_001291
mmu_piR_022652	57	piRNA	mmu_piR_022652
mmu_piR_038513	1	piRNA	mmu_piR_038513
mmu_piR_008567	1	piRNA	mmu_piR_008567
mmu_piR_009360	1	piRNA	mmu_piR_009360
mmu_piR_000209	69	piRNA	mmu_piR_000209
mmu-miR-1249-3p	22	mature	mir-1249
mmu-miR-382-5p	62	hairpin	mir-154
mmu_piR_014063	1	piRNA	mmu_piR_014063
mmu_piR_027367	1	piRNA	mmu_piR_027367
mmu_piR_006373	1	piRNA	mmu_piR_006373
mmu-miR-375-3p	1072	hairpin	mir-375
mmu-miR-30e-5p	138	hairpin	mir-30
mmu_piR_034184	6	piRNA	mmu_piR_034184
mmu_piR_011897	1	piRNA	mmu_piR_011897
mmu_piR_039533	1	piRNA	mmu_piR_039533
mmu_piR_031037	1	piRNA	mmu_piR_031037
mmu_piR_012742	1	piRNA	mmu_piR_012742
mmu_piR_026972	1	piRNA	mmu_piR_026972
mmu-miR-7045-5p	71	hairpin	undef
mmu_piR_027573	1	piRNA	mmu_piR_027573
mmu-miR-150-5p	310	hairpin	mir-150
mmu_piR_006511	80	piRNA	mmu_piR_006511
mmu-miR-1b-5p	3	mature	mir-1
mmu_piR_005932	2	piRNA	mmu_piR_005932
mmu_piR_001297	1	piRNA	mmu_piR_001297
mmu_piR_020750	1	piRNA	mmu_piR_020750
mmu_piR_033563	1	piRNA	mmu_piR_033563
mmu-miR-7047-5p	14	hairpin	undef
mmu_piR_039905	1	piRNA	mmu_piR_039905
mmu_piR_005516	1	piRNA	mmu_piR_005516
mmu_piR_019354	2	piRNA	mmu_piR_019354
mmu-miR-714	258	hairpin	undef
mmu-miR-330-3p	10	hairpin	mir-330
mmu-miR-450a-5p	24	mature	mir-450
mmu-miR-463-5p	1	hairpin	mir-463
mmu_piR_009721	11	piRNA	mmu_piR_009721
mmu-miR-3074-5p	1801	hairpin	mir-3074
mmu-miR-145a-3p	40	mature	mir-145
mmu-miR-1983	285	hairpin	undef
mmu-miR-574-5p	44	mature	mir-574
mmu-miR-103-3p	231	hairpin	mir-103
mmu-miR-532-3p	74	hairpin	mir-188
mmu_piR_022656	1	piRNA	mmu_piR_022656
mmu_piR_034519	1	piRNA	mmu_piR_034519
mmu_piR_025910	1	piRNA	mmu_piR_025910
mmu_piR_029118	1	piRNA	mmu_piR_029118
mmu-miR-434-3p	97	mature	mir-434
mmu_piR_017603	2	piRNA	mmu_piR_017603
mmu-miR-7043-3p	1	hairpin	undef
mmu_piR_015725	1	piRNA	mmu_piR_015725
mmu-let-7k	4221	hairpin	undef
mmu_piR_036403	1	piRNA	mmu_piR_036403
mmu_piR_009801	1	piRNA	mmu_piR_009801
mmu-miR-218-5p	58	hairpin	mir-218
mmu_piR_005874	35	piRNA	mmu_piR_005874
mmu_piR_004161	1	piRNA	mmu_piR_004161
mmu-miR-204-5p	181	hairpin	mir-204
mmu_piR_003279	1	piRNA	mmu_piR_003279
mmu_piR_038638	1	piRNA	mmu_piR_038638
mmu_piR_000949	2	piRNA	mmu_piR_000949
mmu_piR_022607	1	piRNA	mmu_piR_022607
mmu-miR-1247-3p	36	hairpin	mir-1247
mmu-miR-345-5p	1	hairpin	mir-345
mmu_piR_026395	1	piRNA	mmu_piR_026395
mmu_piR_004154	1	piRNA	mmu_piR_004154
mmu_piR_030194	2	piRNA	mmu_piR_030194
mmu_piR_001961	1	piRNA	mmu_piR_001961
mmu_piR_008727	1	piRNA	mmu_piR_008727
mmu-let-7f-5p	2383	hairpin	let-7
mmu_piR_038296	1	piRNA	mmu_piR_038296
mmu-miR-26b-5p	576	hairpin	mir-26
mmu-miR-22-3p	5759	hairpin	mir-22
mmu-miR-3084-5p	35	mature	mir-3084
mmu-miR-1843b-3p	92	mature	mir-1843
mmu-miR-8102	29	hairpin	undef
mmu_piR_017341	823	piRNA	mmu_piR_017341
mmu-miR-451a	141824	hairpin	mir-451
mmu-miR-532-3p	16	mature	mir-188
mmu-miR-194-5p	1085	hairpin	mir-194
mmu_piR_039026	1	piRNA	mmu_piR_039026
mmu_piR_030801	1	piRNA	mmu_piR_030801
mmu-miR-323-3p	2	hairpin	mir-154
mmu_piR_017602	2	piRNA	mmu_piR_017602
mmu-miR-463-5p	2	mature	mir-463
mmu-miR-140-5p	295	mature	mir-140
mmu-miR-30d-5p	787	hairpin	mir-30
mmu_piR_010396	2	piRNA	mmu_piR_010396
mmu-miR-30b-5p	193	hairpin	mir-30
mmu_piR_034656	1	piRNA	mmu_piR_034656
mmu-miR-133b-3p	1	hairpin	mir-133
mmu-miR-363-3p	76	hairpin	mir-363
mmu-miR-3074-2-3p	124	mature	mir-3074
mmu_piR_009557	1	piRNA	mmu_piR_009557
mmu_piR_001233	1	piRNA	mmu_piR_001233
mmu-miR-7a-1-3p	372	hairpin	mir-7
mmu_piR_033797	1	piRNA	mmu_piR_033797
mmu-miR-196b-5p	151	hairpin	mir-196
mmu_piR_037929	1	piRNA	mmu_piR_037929
mmu-miR-425-3p	1265	hairpin	mir-425
mmu-miR-93-3p	1	hairpin	mir-17
mmu_piR_033967	1	piRNA	mmu_piR_033967
mmu-miR-486a-3p	67	hairpin	mir-486
mmu-let-7f-2-3p	101	mature	let-7
mmu_piR_036381	1	piRNA	mmu_piR_036381
mmu_piR_029471	1	piRNA	mmu_piR_029471
mmu-miR-149-5p	1827	hairpin	mir-149
mmu-miR-1843a-3p	69	hairpin	mir-1843
mmu_piR_039556	2	piRNA	mmu_piR_039556
mmu-miR-741-3p	5	hairpin	undef
mmu_piR_033570	1	piRNA	mmu_piR_033570
mmu_piR_038651	1	piRNA	mmu_piR_038651
mmu_piR_038430	1	piRNA	mmu_piR_038430
mmu_piR_039752	1	piRNA	mmu_piR_039752
mmu_piR_000701	1	piRNA	mmu_piR_000701
mmu-miR-1191a	2	mature	undef
mmu-miR-423-5p	753	mature	mir-423
mmu_piR_006854	6	piRNA	mmu_piR_006854
mmu-miR-30d-5p	2957	mature	mir-30
mmu_piR_039334	4	piRNA	mmu_piR_039334
mmu_piR_002094	1	piRNA	mmu_piR_002094
mmu_piR_016650	1	piRNA	mmu_piR_016650
mmu_piR_003342	3	piRNA	mmu_piR_003342
mmu-miR-320-3p	1037	mature	mir-320
mmu-miR-223-3p	611	mature	mir-223
mmu-miR-140-5p	436	hairpin	mir-140
mmu-miR-3060-3p	1194	hairpin	undef
mmu_piR_001527	18	piRNA	mmu_piR_001527
mmu-miR-34b-3p	61	mature	mir-34
mmu_piR_011724	1	piRNA	mmu_piR_011724
mmu_piR_033240	1	piRNA	mmu_piR_033240
mmu-miR-130b-3p	34	hairpin	mir-130
mmu-miR-28a-3p	225	hairpin	mir-28
mmu-miR-7117-5p	104	hairpin	undef
mmu-miR-301a-3p	103	hairpin	mir-130
mmu_piR_038801	1	piRNA	mmu_piR_038801
mmu_piR_005881	1	piRNA	mmu_piR_005881
mmu_piR_013682	2224	piRNA	mmu_piR_013682
mmu-let-7a-1-3p,mmu-let-7c-2-3p	83	mature	let-7
mmu-miR-196b-5p	989	mature	mir-196
mmu_piR_006211	302	piRNA	mmu_piR_006211
mmu_piR_036358	1	piRNA	mmu_piR_036358
mmu-miR-30e-5p	30	mature	mir-30
mmu-miR-187-3p	33	mature	mir-187
mmu_piR_017844	1	piRNA	mmu_piR_017844
mmu_piR_012026	1	piRNA	mmu_piR_012026
mmu-miR-511-3p	30	hairpin	mir-506
mmu_piR_016103	1	piRNA	mmu_piR_016103
mmu_piR_025836	1	piRNA	mmu_piR_025836
mmu_piR_022530	1	piRNA	mmu_piR_022530
mmu-let-7e-3p	4	mature	let-7
mmu-miR-98-5p	316	hairpin	let-7
mmu_piR_016035	1	piRNA	mmu_piR_016035
mmu-miR-10a-3p	35	hairpin	mir-10
mmu_piR_008901	1	piRNA	mmu_piR_008901
mmu_piR_014071	1	piRNA	mmu_piR_014071
mmu_piR_017141	2	piRNA	mmu_piR_017141
mmu-miR-125a-5p	2	mature	mir-10
mmu-miR-136-3p	16	hairpin	mir-136
mmu_piR_000149	1	piRNA	mmu_piR_000149
mmu_piR_029183	1	piRNA	mmu_piR_029183
mmu_piR_037373	1	piRNA	mmu_piR_037373
mmu_piR_023459	2	piRNA	mmu_piR_023459
mmu-miR-296-5p	52	hairpin	mir-296
mmu_piR_009370	1	piRNA	mmu_piR_009370
mmu-miR-7091-3p	40	mature	undef
mmu-miR-1839-3p	48	hairpin	mir-1839
mmu_piR_004920	1	piRNA	mmu_piR_004920
mmu_piR_001577	1	piRNA	mmu_piR_001577
mmu_piR_006555	1	piRNA	mmu_piR_006555
mmu-miR-3572-3p	2	mature	mir-3572
mmu-miR-874-3p	31	hairpin	mir-874
mmu-miR-29a-5p	14	hairpin	mir-29
mmu-miR-1938	62	hairpin	undef
mmu-miR-181a-2-3p	42	hairpin	mir-181
mmu-miR-146a-5p	7020	hairpin	mir-146
mmu_piR_033512	1	piRNA	mmu_piR_033512
mmu_piR_032917	2	piRNA	mmu_piR_032917
mmu_piR_027163	1	piRNA	mmu_piR_027163
mmu_piR_008445	1	piRNA	mmu_piR_008445
mmu-miR-138-5p	189	mature	mir-138
mmu-miR-144-3p	821	hairpin	mir-144
mmu_piR_022586	1	piRNA	mmu_piR_022586
mmu_piR_038139	2	piRNA	mmu_piR_038139
mmu-miR-15b-3p	225	hairpin	mir-15
mmu_piR_019856	1	piRNA	mmu_piR_019856
mmu_piR_012603	1	piRNA	mmu_piR_012603
mmu_piR_017599	1	piRNA	mmu_piR_017599
mmu_piR_008214	1	piRNA	mmu_piR_008214
mmu_piR_010888	1	piRNA	mmu_piR_010888
mmu-miR-30c-5p	2	mature	mir-30
mmu-miR-193b-3p	874	mature	mir-193
mmu-miR-181a-1-3p	1	mature	mir-181
mmu_piR_002821	1	piRNA	mmu_piR_002821
mmu_piR_006637	2	piRNA	mmu_piR_006637
mmu_piR_038849	1	piRNA	mmu_piR_038849
mmu_piR_020492	123	piRNA	mmu_piR_020492
mmu_piR_034146	1	piRNA	mmu_piR_034146
mmu_piR_006987	1	piRNA	mmu_piR_006987
mmu-miR-8091	31	hairpin	undef
mmu-miR-292a-5p	1	hairpin	mir-290
mmu_piR_039046	1	piRNA	mmu_piR_039046
mmu_piR_014006	1	piRNA	mmu_piR_014006
mmu_piR_014947	3	piRNA	mmu_piR_014947
mmu_piR_019253	1	piRNA	mmu_piR_019253
mmu-miR-12178-5p	38	hairpin	undef
mmu_piR_018370	44	piRNA	mmu_piR_018370
mmu-miR-139-5p	2123	mature	mir-139
mmu-miR-200a-3p	3	hairpin	mir-8
mmu-let-7a-5p	3460	hairpin	let-7
mmu_piR_031815	1	piRNA	mmu_piR_031815
mmu_piR_024721	1	piRNA	mmu_piR_024721
mmu-miR-880-3p	3	mature	mir-880
mmu_piR_009854	2	piRNA	mmu_piR_009854
mmu_piR_033075	1	piRNA	mmu_piR_033075
mmu_piR_010700	1	piRNA	mmu_piR_010700
mmu_piR_017085	1	piRNA	mmu_piR_017085
mmu_piR_039885	1	piRNA	mmu_piR_039885
mmu_piR_026358	1	piRNA	mmu_piR_026358
mmu_piR_037965	1	piRNA	mmu_piR_037965
mmu_piR_011234	1	piRNA	mmu_piR_011234
mmu_piR_034092	1	piRNA	mmu_piR_034092
mmu_piR_028187	1	piRNA	mmu_piR_028187
mmu-miR-125b-5p	52	mature	mir-10
mmu-miR-770-3p	26	hairpin	mir-770
mmu-miR-23a-3p	34269	hairpin	mir-23
mmu-let-7i-3p	20	mature	let-7
mmu-miR-7073-3p	13	hairpin	undef
mmu-miR-1945	36	hairpin	undef
mmu_piR_020788	21	piRNA	mmu_piR_020788
mmu_piR_015232	1	piRNA	mmu_piR_015232
mmu-miR-182-3p	68	hairpin	mir-182
mmu-miR-1964-3p	59	mature	undef
mmu-miR-369-3p	1	hairpin	mir-154
mmu-miR-760-3p	1	hairpin	mir-760
mmu_piR_035629	2	piRNA	mmu_piR_035629
mmu_piR_028895	2	piRNA	mmu_piR_028895
mmu-miR-877-5p	33	mature	mir-877
mmu-miR-7073-5p	58	hairpin	undef
mmu_piR_005329	1	piRNA	mmu_piR_005329
mmu-miR-3072-3p	1	mature	mir-3072
mmu-miR-99b-3p	103	hairpin	mir-10
mmu_piR_038777	2	piRNA	mmu_piR_038777
mmu_piR_038884	1	piRNA	mmu_piR_038884
mmu_piR_011127	1	piRNA	mmu_piR_011127
mmu_piR_004949	1	piRNA	mmu_piR_004949
mmu-miR-374b-5p	297	mature	mir-374
mmu-miR-191-3p	34	mature	mir-191
mmu-miR-22-5p	274	hairpin	mir-22
mmu_piR_009309	1	piRNA	mmu_piR_009309
mmu-miR-122-5p	265	hairpin	mir-122
mmu-miR-711	315	hairpin	mir-711
mmu_piR_000273	61	piRNA	mmu_piR_000273
mmu_piR_001187	35	piRNA	mmu_piR_001187
mmu-miR-6910-5p	138	hairpin	undef
mmu_piR_033308	1	piRNA	mmu_piR_033308
mmu-miR-26a-5p	2359	mature	mir-26
mmu_piR_002106	2	piRNA	mmu_piR_002106
mmu_piR_028163	1	piRNA	mmu_piR_028163
mmu_piR_034302	2	piRNA	mmu_piR_034302
mmu-miR-16-5p	22299	mature	mir-15
mmu_piR_024390	1	piRNA	mmu_piR_024390
mmu-miR-6967-3p	48	hairpin	mir-6967
mmu_piR_036749	1	piRNA	mmu_piR_036749
mmu_piR_029111	1	piRNA	mmu_piR_029111
mmu-miR-218-5p	163	mature	mir-218
mmu_piR_000616	120	piRNA	mmu_piR_000616
mmu-miR-191-5p	5703	hairpin	mir-191
mmu_piR_014428	1	piRNA	mmu_piR_014428
mmu_piR_011988	215	piRNA	mmu_piR_011988
mmu_piR_024965	1	piRNA	mmu_piR_024965
mmu-miR-185-5p	1003	hairpin	mir-185
mmu-miR-324-5p	2	hairpin	mir-324
mmu_piR_038399	2	piRNA	mmu_piR_038399
mmu_piR_024062	2	piRNA	mmu_piR_024062
mmu_piR_022291	1	piRNA	mmu_piR_022291
mmu_piR_003600	1	piRNA	mmu_piR_003600
mmu-miR-143-3p	988	mature	mir-143
mmu-miR-203b-5p	44	hairpin	undef
mmu_piR_006221	2	piRNA	mmu_piR_006221
mmu_piR_039953	1	piRNA	mmu_piR_039953
mmu-miR-215-5p	669	hairpin	mir-192
mmu_piR_006894	2	piRNA	mmu_piR_006894
mmu-miR-505-5p	1	mature	mir-505
mmu-miR-130a-3p	767	hairpin	mir-130
mmu-miR-499-5p	78	hairpin	mir-499
mmu-miR-15a-5p	521	hairpin	mir-15
mmu_piR_026676	1	piRNA	mmu_piR_026676
mmu_piR_039800	1	piRNA	mmu_piR_039800
mmu-miR-101b-3p	55	mature	mir-101
mmu_piR_009075	39	piRNA	mmu_piR_009075
mmu-miR-871-5p	1	hairpin	mir-743
mmu_piR_020609	1	piRNA	mmu_piR_020609
mmu-miR-185-5p	374	mature	mir-185
mmu-miR-872-5p	6	hairpin	mir-872
mmu-miR-15b-5p	123	mature	mir-15
mmu-miR-138-2-3p	4	mature	mir-138
mmu_piR_014400	1	piRNA	mmu_piR_014400
mmu-miR-6937-5p	2	hairpin	undef
mmu_piR_014431	2	piRNA	mmu_piR_014431
mmu-miR-615-3p	25	mature	mir-615
mmu_piR_039060	4	piRNA	mmu_piR_039060
mmu-miR-326-3p	1534	hairpin	mir-326
mmu_piR_011342	1	piRNA	mmu_piR_011342
mmu_piR_005882	1	piRNA	mmu_piR_005882
mmu-miR-130b-5p	34	hairpin	mir-130
mmu-miR-125a-5p	2272	hairpin	mir-10
mmu-miR-3058-3p	2	hairpin	undef
mmu_piR_022133	36	piRNA	mmu_piR_022133
mmu-miR-192-5p	2180	hairpin	mir-192
mmu-miR-423-3p	1418	mature	mir-423
mmu_piR_016422	52	piRNA	mmu_piR_016422
mmu_piR_004643	4	piRNA	mmu_piR_004643
mmu_piR_010412	1	piRNA	mmu_piR_010412
mmu_piR_003278	2	piRNA	mmu_piR_003278
mmu_piR_010163	1	piRNA	mmu_piR_010163
mmu_piR_037362	1	piRNA	mmu_piR_037362
mmu_piR_000688	1	piRNA	mmu_piR_000688
mmu-miR-194-5p	38	mature	mir-194
mmu-miR-501-3p	63	mature	mir-500
mmu-miR-181b-5p	1	mature	mir-181
mmu_piR_027400	1	piRNA	mmu_piR_027400
mmu_piR_030937	1	piRNA	mmu_piR_030937
mmu-miR-8112	703	mature	undef
mmu_piR_036281	1	piRNA	mmu_piR_036281
mmu_piR_001216	1	piRNA	mmu_piR_001216
mmu_piR_006518	1	piRNA	mmu_piR_006518
mmu_piR_034329	1	piRNA	mmu_piR_034329
mmu_piR_037803	1	piRNA	mmu_piR_037803
mmu_piR_027940	1	piRNA	mmu_piR_027940
mmu_piR_000691	973	piRNA	mmu_piR_000691
mmu-miR-8116	44	hairpin	undef
mmu-miR-138-1-3p	34	mature	mir-138
mmu_piR_021947	1	piRNA	mmu_piR_021947
mmu-miR-7067-3p	1	hairpin	undef
mmu_piR_031448	1274	piRNA	mmu_piR_031448
mmu_piR_014395	14	piRNA	mmu_piR_014395
mmu-miR-712-5p	88	hairpin	undef
mmu_piR_024216	1	piRNA	mmu_piR_024216
mmu-miR-872-3p	490	hairpin	mir-872
mmu-miR-34c-5p	1	mature	mir-34
mmu_piR_010900	1	piRNA	mmu_piR_010900
mmu_piR_030961	1	piRNA	mmu_piR_030961
mmu_piR_028520	1	piRNA	mmu_piR_028520
mmu-miR-143-3p	755	hairpin	mir-143
mmu_piR_004832	1	piRNA	mmu_piR_004832
mmu-miR-423-5p	297	hairpin	mir-423
mmu_piR_013933	1	piRNA	mmu_piR_013933
mmu-miR-700-5p	66	hairpin	undef
mmu-miR-101a-3p	83	hairpin	mir-101
mmu_piR_006489	1	piRNA	mmu_piR_006489
mmu_piR_002240	1	piRNA	mmu_piR_002240
mmu-miR-140-3p	351	mature	mir-140
mmu_piR_033250	1	piRNA	mmu_piR_033250
mmu_piR_018442	1	piRNA	mmu_piR_018442
mmu-miR-200b-3p	77	hairpin	mir-8
mmu-miR-26b-5p	744	mature	mir-26
mmu_piR_017027	1	piRNA	mmu_piR_017027
mmu_piR_012513	1	piRNA	mmu_piR_012513
mmu-miR-34b-5p	2	mature	mir-34
mmu-miR-7009-3p	2	hairpin	undef
mmu_piR_010858	218	piRNA	mmu_piR_010858
mmu_piR_039223	3	piRNA	mmu_piR_039223
mmu-miR-7075-3p	8	mature	undef
mmu-miR-547-3p	2	hairpin	mir-547
mmu_piR_036984	1	piRNA	mmu_piR_036984
mmu-miR-223-3p	2300	hairpin	mir-223
mmu-miR-99b-5p	1418	mature	mir-10
mmu-miR-361-5p	27	mature	mir-361
mmu_piR_013241	1	piRNA	mmu_piR_013241
mmu_piR_013592	2	piRNA	mmu_piR_013592
mmu_piR_012152	1	piRNA	mmu_piR_012152
mmu-miR-148a-3p	3	hairpin	mir-148
mmu-miR-15b-5p	2406	hairpin	mir-15
mmu-miR-186-5p	123	mature	mir-186
mmu_piR_017718	1	piRNA	mmu_piR_017718
mmu_piR_004801	3	piRNA	mmu_piR_004801
mmu_piR_014680	1	piRNA	mmu_piR_014680
mmu-miR-322-5p	107	mature	mir-322
mmu-miR-7016-3p	1	hairpin	undef
mmu-miR-501-3p	3	hairpin	mir-500
mmu-miR-196a-5p	3	hairpin	mir-196
mmu-miR-574-3p	29	hairpin	mir-574
mmu-miR-12192-5p	1	hairpin	undef
mmu-miR-23b-5p	2	hairpin	mir-23
mmu_piR_032832	1	piRNA	mmu_piR_032832
mmu_piR_002945	1	piRNA	mmu_piR_002945
mmu-miR-5126	1569	mature	undef
mmu_piR_003397	20	piRNA	mmu_piR_003397
mmu-miR-471-3p	10	mature	mir-471
mmu_piR_004288	1	piRNA	mmu_piR_004288
mmu_piR_002270	1	piRNA	mmu_piR_002270
mmu_piR_014117	1	piRNA	mmu_piR_014117
mmu_piR_003100	1	piRNA	mmu_piR_003100
mmu_piR_013165	1	piRNA	mmu_piR_013165
mmu_piR_037157	1	piRNA	mmu_piR_037157
mmu_piR_014501	1	piRNA	mmu_piR_014501
mmu_piR_033115	1	piRNA	mmu_piR_033115
mmu_piR_013153	1	piRNA	mmu_piR_013153
mmu_piR_008179	1	piRNA	mmu_piR_008179
mmu-miR-877-3p	65	hairpin	mir-877
mmu_piR_020705	1	piRNA	mmu_piR_020705
mmu-miR-328-3p	8968	mature	mir-328
mmu_piR_025573	1	piRNA	mmu_piR_025573
mmu-miR-467c-5p	1	mature	mir-467
mmu_piR_009377	1	piRNA	mmu_piR_009377
mmu-miR-200c-3p	28	mature	mir-8
mmu_piR_036930	1	piRNA	mmu_piR_036930
mmu_piR_027794	1	piRNA	mmu_piR_027794
mmu-miR-21a-5p	4204	hairpin	mir-21
mmu_piR_033364	1	piRNA	mmu_piR_033364
mmu-miR-384-5p	5	mature	mir-384
mmu_piR_005355	1	piRNA	mmu_piR_005355
mmu_piR_029628	2	piRNA	mmu_piR_029628
mmu_piR_008600	1	piRNA	mmu_piR_008600
mmu-miR-652-3p	2848	mature	mir-652
mmu_piR_029811	15	piRNA	mmu_piR_029811
mmu-miR-485-5p	43	hairpin	mir-485
mmu_piR_037200	1	piRNA	mmu_piR_037200
mmu-let-7c-5p	1508	hairpin	let-7
mmu-miR-126a-3p	522	mature	mir-126
mmu_piR_019118	1	piRNA	mmu_piR_019118
mmu_piR_015204	1	piRNA	mmu_piR_015204
mmu_piR_011117	1	piRNA	mmu_piR_011117
mmu_piR_005433	1	piRNA	mmu_piR_005433
mmu_piR_022198	1	piRNA	mmu_piR_022198
mmu_piR_013389	1	piRNA	mmu_piR_013389
mmu_piR_016191	1	piRNA	mmu_piR_016191
mmu_piR_038351	433	piRNA	mmu_piR_038351
mmu_piR_033809	1	piRNA	mmu_piR_033809
mmu_piR_021043	1	piRNA	mmu_piR_021043
mmu-miR-3066-5p	24	hairpin	undef
mmu-miR-5126	17805	hairpin	undef
mmu_piR_038864	1	piRNA	mmu_piR_038864
mmu_piR_025264	3	piRNA	mmu_piR_025264
mmu_piR_009428	3	piRNA	mmu_piR_009428
mmu-let-7a-5p	4701	mature	let-7
mmu_piR_036401	1	piRNA	mmu_piR_036401
mmu_piR_024233	1	piRNA	mmu_piR_024233
mmu-miR-202-5p	1	mature	mir-202
mmu_piR_023253	1	piRNA	mmu_piR_023253
mmu_piR_021407	1	piRNA	mmu_piR_021407
mmu_piR_038918	1	piRNA	mmu_piR_038918
mmu_piR_034193	1	piRNA	mmu_piR_034193
mmu-miR-6953-3p	29	mature	undef
mmu_piR_039966	1	piRNA	mmu_piR_039966
mmu-let-7a-1-3p,mmu-let-7c-2-3p	403	hairpin	let-7
mmu-miR-322-3p	51	mature	mir-322
mmu_piR_021829	2	piRNA	mmu_piR_021829
mmu-miR-7024-3p	147	hairpin	undef
mmu-miR-6910-3p	8	hairpin	undef
mmu-miR-872-5p	801	mature	mir-872
mmu_piR_035796	2	piRNA	mmu_piR_035796
mmu_piR_001891	2	piRNA	mmu_piR_001891
mmu_piR_027832	1	piRNA	mmu_piR_027832
mmu-miR-376c-3p	1	hairpin	mir-368
mmu_piR_007951	1	piRNA	mmu_piR_007951
mmu_piR_017874	1	piRNA	mmu_piR_017874
mmu_piR_023633	1	piRNA	mmu_piR_023633
mmu-miR-500-3p	32	mature	mir-500
mmu_piR_000802	34	piRNA	mmu_piR_000802
mmu-miR-200b-5p	29	hairpin	mir-8
mmu_piR_017773	1	piRNA	mmu_piR_017773
mmu-miR-138-5p	41	hairpin	mir-138
mmu_piR_029867	1	piRNA	mmu_piR_029867
mmu_piR_004235	1	piRNA	mmu_piR_004235
mmu-miR-541-5p	1	hairpin	mir-541
mmu_piR_006112	15	piRNA	mmu_piR_006112
mmu_piR_039794	1	piRNA	mmu_piR_039794
mmu-miR-151-3p	90	hairpin	mir-28
mmu-miR-450a-5p	23	hairpin	mir-450
mmu_piR_035372	1	piRNA	mmu_piR_035372
mmu_piR_026552	3	piRNA	mmu_piR_026552
mmu-miR-7002-5p	14	hairpin	undef
mmu-miR-425-3p	661	mature	mir-425
mmu_piR_033128	1	piRNA	mmu_piR_033128
mmu-miR-2861	96	hairpin	mir-2861
mmu_piR_029739	34	piRNA	mmu_piR_029739
mmu-miR-3473c	1	hairpin	mir-3473
mmu-miR-19a-3p	25	hairpin	mir-19
mmu-miR-1951	1	hairpin	undef
mmu-miR-30a-5p	178	hairpin	mir-30
mmu-miR-125b-2-3p	28	hairpin	mir-10
mmu_piR_026705	6	piRNA	mmu_piR_026705
mmu_piR_034250	2	piRNA	mmu_piR_034250
mmu-miR-126a-3p	283	hairpin	mir-126
mmu-miR-153-3p	4	mature	mir-153
mmu_piR_007596	1	piRNA	mmu_piR_007596
mmu-miR-1982-3p	32	hairpin	undef
mmu_piR_039869	1	piRNA	mmu_piR_039869
mmu-miR-6538	714	hairpin	undef
mmu_piR_000870	89	piRNA	mmu_piR_000870
mmu-miR-532-5p	47	hairpin	mir-188
mmu_piR_038792	1	piRNA	mmu_piR_038792
mmu_piR_039390	1	piRNA	mmu_piR_039390
mmu-miR-709	31	mature	undef
mmu_piR_006156	1	piRNA	mmu_piR_006156
mmu_piR_038339	1	piRNA	mmu_piR_038339
mmu-miR-326-3p	531	mature	mir-326
mmu-miR-341-3p	27	hairpin	mir-341
mmu-miR-871-3p	1	mature	mir-743
mmu_piR_001316	1	piRNA	mmu_piR_001316
mmu_piR_000924	1	piRNA	mmu_piR_000924
mmu_piR_024655	1	piRNA	mmu_piR_024655
mmu_piR_010169	1	piRNA	mmu_piR_010169
mmu-miR-17-3p	34	hairpin	mir-17
mmu-miR-132-5p	65	hairpin	mir-132
mmu-miR-16-2-3p	32	mature	mir-15
mmu_piR_039837	2	piRNA	mmu_piR_039837
mmu_piR_036640	297	piRNA	mmu_piR_036640
mmu-miR-3470b	1	mature	mir-3470
mmu_piR_026073	6	piRNA	mmu_piR_026073
mmu-miR-148b-3p	1	hairpin	mir-148
mmu-miR-6944-5p	32	hairpin	undef
mmu_piR_016482	1	piRNA	mmu_piR_016482
mmu-miR-204-5p	799	mature	mir-204
mmu-miR-9b-3p	9	hairpin	undef
mmu_piR_022616	1	piRNA	mmu_piR_022616
mmu_piR_022526	3	piRNA	mmu_piR_022526
mmu-miR-328-3p	47497	hairpin	mir-328
mmu_piR_001477	1	piRNA	mmu_piR_001477
mmu_piR_019021	1	piRNA	mmu_piR_019021
mmu_piR_028169	1	piRNA	mmu_piR_028169
mmu_piR_012193	8	piRNA	mmu_piR_012193
mmu-miR-153-3p	1	hairpin	mir-153
mmu_piR_022097	4426	piRNA	mmu_piR_022097
mmu_piR_035757	2	piRNA	mmu_piR_035757
mmu-miR-6939-3p	25	mature	undef
mmu_piR_019542	6	piRNA	mmu_piR_019542
mmu-miR-652-3p	1635	hairpin	mir-652
mmu_piR_038567	2	piRNA	mmu_piR_038567
mmu-miR-30c-5p	1311	hairpin	mir-30
mmu_piR_020252	1	piRNA	mmu_piR_020252
mmu-miR-23b-3p	42	hairpin	mir-23
mmu_piR_007781	1	piRNA	mmu_piR_007781
mmu-miR-342-5p	1	hairpin	mir-342
mmu_piR_006614	1	piRNA	mmu_piR_006614
mmu-miR-673-5p	1	hairpin	mir-673
mmu_piR_010531	1	piRNA	mmu_piR_010531
mmu_piR_023189	335	piRNA	mmu_piR_023189
mmu-miR-503-3p	105	mature	mir-503
mmu_piR_026314	2	piRNA	mmu_piR_026314
mmu_piR_012327	25	piRNA	mmu_piR_012327
mmu_piR_033477	1	piRNA	mmu_piR_033477
mmu-miR-425-5p	794	hairpin	mir-425
mmu-miR-486b-3p	1929	mature	mir-486
mmu_piR_025260	1	piRNA	mmu_piR_025260
mmu-miR-32-5p	56	hairpin	mir-32
mmu-miR-574-3p	129	mature	mir-574
mmu_piR_000958	91	piRNA	mmu_piR_000958
mmu_piR_024113	2	piRNA	mmu_piR_024113
mmu_piR_015833	4	piRNA	mmu_piR_015833
mmu_piR_016003	1	piRNA	mmu_piR_016003
mmu_piR_038990	1	piRNA	mmu_piR_038990
mmu_piR_011436	2	piRNA	mmu_piR_011436
mmu_piR_032165	1	piRNA	mmu_piR_032165
mmu-miR-151-5p	260	mature	mir-28
mmu_piR_026310	1	piRNA	mmu_piR_026310
mmu-miR-1306-3p	32	hairpin	mir-1306
mmu_piR_009011	1	piRNA	mmu_piR_009011
mmu_piR_024518	2	piRNA	mmu_piR_024518
mmu-miR-6980-3p	1	hairpin	undef
mmu-miR-133a-3p	269	mature	mir-133
mmu_piR_020513	1	piRNA	mmu_piR_020513
mmu-miR-10a-5p	1470	mature	mir-10
mmu_piR_000499	2	piRNA	mmu_piR_000499
mmu_piR_027973	1	piRNA	mmu_piR_027973
mmu_piR_015692	1	piRNA	mmu_piR_015692
mmu-let-7b-5p	3617	hairpin	let-7
mmu_piR_032602	2	piRNA	mmu_piR_032602
mmu_piR_034539	1	piRNA	mmu_piR_034539
mmu_piR_038600	1	piRNA	mmu_piR_038600
mmu-miR-6941-5p	158	hairpin	undef
mmu-miR-324-3p	1	hairpin	mir-324
mmu_piR_031312	1	piRNA	mmu_piR_031312
mmu_piR_025218	1	piRNA	mmu_piR_025218
mmu_piR_028026	1	piRNA	mmu_piR_028026
mmu_piR_019924	1	piRNA	mmu_piR_019924
mmu_piR_032209	1	piRNA	mmu_piR_032209
mmu-miR-215-3p	97	hairpin	mir-192
mmu-miR-500-3p	38	hairpin	mir-500
mmu_piR_009459	1	piRNA	mmu_piR_009459
mmu_piR_004956	1	piRNA	mmu_piR_004956
mmu-let-7b-5p	3854	mature	let-7
mmu_piR_004115	1	piRNA	mmu_piR_004115
mmu-miR-127-3p	195	hairpin	mir-127
mmu-miR-24-1-5p	33	hairpin	mir-24
mmu_piR_020821	1	piRNA	mmu_piR_020821
mmu_piR_018409	31	piRNA	mmu_piR_018409
mmu-miR-26a-5p	238	hairpin	mir-26
mmu_piR_002962	1	piRNA	mmu_piR_002962
mmu_piR_013678	1	piRNA	mmu_piR_013678
mmu_piR_016980	1	piRNA	mmu_piR_016980
mmu_piR_036718	12	piRNA	mmu_piR_036718
mmu-miR-499-5p	152	mature	mir-499
mmu_piR_000219	121	piRNA	mmu_piR_000219
mmu-miR-486a-5p,mmu-miR-486b-5p	10330	mature	mir-486
mmu-miR-30e-3p	21	mature	mir-30
mmu_piR_020337	37	piRNA	mmu_piR_020337
mmu-miR-101b-3p	1	hairpin	mir-101
mmu_piR_030524	2	piRNA	mmu_piR_030524
mmu-miR-3473b	42	hairpin	mir-3473
mmu_piR_020478	1	piRNA	mmu_piR_020478
mmu_piR_022259	1	piRNA	mmu_piR_022259
mmu-miR-25-5p	21	hairpin	mir-25
mmu-miR-2137	41	hairpin	undef
mmu_piR_037723	2	piRNA	mmu_piR_037723
mmu-miR-742-3p	1	hairpin	mir-742
mmu-miR-339-5p	31	mature	mir-339
mmu-miR-382-5p	2	mature	mir-154
mmu_piR_035567	1	piRNA	mmu_piR_035567
mmu_piR_037871	1	piRNA	mmu_piR_037871
mmu-miR-340-3p	1	hairpin	mir-340
mmu-miR-770-5p	1	hairpin	mir-770
mmu-miR-99a-5p	1326	hairpin	mir-10
mmu-miR-192-5p	2161	mature	mir-192
mmu-miR-411-3p	1	hairpin	mir-379
mmu_piR_036377	1	piRNA	mmu_piR_036377
mmu-miR-144-5p	29	hairpin	mir-144
mmu_piR_031383	1	piRNA	mmu_piR_031383
mmu_piR_005789	1	piRNA	mmu_piR_005789
mmu_piR_023996	1	piRNA	mmu_piR_023996
mmu_piR_036481	1	piRNA	mmu_piR_036481
mmu-miR-744-5p	108	hairpin	mir-744
mmu_piR_001510	1	piRNA	mmu_piR_001510
mmu_piR_019050	1	piRNA	mmu_piR_019050
mmu-miR-878-3p	1	mature	mir-878
mmu-miR-2137	8	mature	undef
mmu_piR_028154	1	piRNA	mmu_piR_028154
mmu_piR_011125	1	piRNA	mmu_piR_011125
mmu_piR_006197	2	piRNA	mmu_piR_006197
mmu-let-7e-3p	140	hairpin	let-7
mmu_piR_018376	3	piRNA	mmu_piR_018376
mmu-miR-378c	1	mature	undef
mmu_piR_031973	1	piRNA	mmu_piR_031973
mmu_piR_010365	1	piRNA	mmu_piR_010365
mmu_piR_028614	1	piRNA	mmu_piR_028614
mmu_piR_004567	19	piRNA	mmu_piR_004567
mmu-miR-350-3p	510	hairpin	mir-350
mmu_piR_012675	2	piRNA	mmu_piR_012675
mmu_piR_002440	1	piRNA	mmu_piR_002440
mmu-miR-25-3p	10654	mature	mir-25
mmu_piR_037212	1	piRNA	mmu_piR_037212
mmu_piR_027932	1	piRNA	mmu_piR_027932
mmu-miR-6956-3p	22	hairpin	undef
mmu_piR_002673	2	piRNA	mmu_piR_002673
mmu_piR_033307	1	piRNA	mmu_piR_033307
mmu-miR-138-1-3p	7	hairpin	mir-138
mmu-miR-429-3p	2038	hairpin	mir-8
mmu_piR_017307	1	piRNA	mmu_piR_017307
mmu_piR_000782	1	piRNA	mmu_piR_000782
mmu_piR_014073	2	piRNA	mmu_piR_014073
mmu_piR_025897	1	piRNA	mmu_piR_025897
mmu-let-7g-3p	43	hairpin	let-7
mmu_piR_030258	1	piRNA	mmu_piR_030258
mmu-let-7f-1-3p	197	hairpin	let-7
mmu_piR_029963	1	piRNA	mmu_piR_029963
mmu-miR-212-3p	214	hairpin	mir-132
mmu_piR_034691	3	piRNA	mmu_piR_034691
mmu_piR_015368	1	piRNA	mmu_piR_015368
mmu_piR_031218	1	piRNA	mmu_piR_031218
mmu-miR-330-5p	171	hairpin	mir-330
mmu_piR_009676	1	piRNA	mmu_piR_009676
mmu-miR-29b-1-5p	27	hairpin	mir-29
mmu_piR_036392	1	piRNA	mmu_piR_036392
mmu_piR_028326	1	piRNA	mmu_piR_028326
mmu_piR_014472	1	piRNA	mmu_piR_014472
mmu_piR_022336	1	piRNA	mmu_piR_022336
mmu-miR-106b-3p	88	hairpin	mir-17
mmu_piR_020211	1	piRNA	mmu_piR_020211
mmu-miR-1934-3p	90	hairpin	undef
mmu_piR_030519	12	piRNA	mmu_piR_030519
mmu_piR_027594	1	piRNA	mmu_piR_027594
mmu-miR-3474	21	hairpin	undef
mmu_piR_021095	1	piRNA	mmu_piR_021095
mmu_piR_029972	1	piRNA	mmu_piR_029972
mmu-miR-19b-3p	379	mature	mir-19
mmu_piR_038749	1	piRNA	mmu_piR_038749
mmu_piR_007043	1	piRNA	mmu_piR_007043
mmu-miR-676-3p	516	mature	mir-676
mmu_piR_024039	2	piRNA	mmu_piR_024039
mmu_piR_028799	1	piRNA	mmu_piR_028799
mmu_piR_005028	1	piRNA	mmu_piR_005028
mmu-miR-1b-5p	2235	hairpin	mir-1
mmu_piR_003065	1	piRNA	mmu_piR_003065
mmu-miR-5132-3p	74	hairpin	mir-5132
mmu_piR_026965	1	piRNA	mmu_piR_026965
mmu_piR_020433	1	piRNA	mmu_piR_020433
mmu-let-7g-5p	10012	mature	let-7
mmu_piR_030952	1	piRNA	mmu_piR_030952
mmu_piR_034325	1	piRNA	mmu_piR_034325
mmu_piR_030510	1	piRNA	mmu_piR_030510
mmu-miR-378d	669	hairpin	undef
mmu-miR-222-3p	167	mature	mir-221
mmu_piR_032146	1	piRNA	mmu_piR_032146
mmu_piR_029128	1	piRNA	mmu_piR_029128
mmu_piR_026137	63	piRNA	mmu_piR_026137
mmu_piR_006813	1	piRNA	mmu_piR_006813
mmu_piR_027593	1	piRNA	mmu_piR_027593
mmu_piR_006531	1	piRNA	mmu_piR_006531
mmu_piR_039109	1	piRNA	mmu_piR_039109
mmu_piR_019127	1	piRNA	mmu_piR_019127
mmu-miR-379-5p	32	hairpin	mir-379
mmu_piR_003769	1	piRNA	mmu_piR_003769
mmu_piR_007099	1	piRNA	mmu_piR_007099
mmu-miR-7a-1-3p	310	mature	mir-7
mmu-miR-15b-3p	68	mature	mir-15
mmu-miR-296-5p	146	mature	mir-296
mmu_piR_026602	66	piRNA	mmu_piR_026602
mmu_piR_029343	232	piRNA	mmu_piR_029343
mmu_piR_014167	1	piRNA	mmu_piR_014167
mmu_piR_000620	63	piRNA	mmu_piR_000620
mmu-miR-1983	819	mature	undef
mmu_piR_004731	1	piRNA	mmu_piR_004731
mmu-miR-181a-5p	487	mature	mir-181
mmu-miR-92a-3p	13753	mature	mir-25
mmu_piR_016282	15	piRNA	mmu_piR_016282
mmu_piR_037004	1	piRNA	mmu_piR_037004
mmu_piR_016101	1	piRNA	mmu_piR_016101
mmu_piR_020300	1	piRNA	mmu_piR_020300
mmu_piR_021785	3885	piRNA	mmu_piR_021785
mmu-miR-378d	3	mature	undef
mmu_piR_019605	1	piRNA	mmu_piR_019605
mmu-miR-1981-3p	23	hairpin	undef
mmu-miR-146a-5p	14948	mature	mir-146
mmu_piR_028840	1	piRNA	mmu_piR_028840
mmu_piR_001367	1	piRNA	mmu_piR_001367
mmu_piR_017450	1	piRNA	mmu_piR_017450
mmu_piR_020546	1	piRNA	mmu_piR_020546
mmu_piR_015705	26	piRNA	mmu_piR_015705
mmu-miR-93-5p	14355	hairpin	mir-17
mmu_piR_037120	1	piRNA	mmu_piR_037120
mmu_piR_007469	2	piRNA	mmu_piR_007469
mmu-miR-30a-5p	228	mature	mir-30
mmu-miR-1249-3p	58	hairpin	mir-1249
mmu_piR_012674	1	piRNA	mmu_piR_012674
mmu-miR-335-5p	29	hairpin	mir-335
mmu-miR-3965	3	mature	undef
mmu_piR_020540	1	piRNA	mmu_piR_020540
mmu_piR_031865	1	piRNA	mmu_piR_031865
mmu_piR_006457	1	piRNA	mmu_piR_006457
mmu_piR_030163	2	piRNA	mmu_piR_030163
mmu_piR_030315	1	piRNA	mmu_piR_030315
mmu_piR_033476	28	piRNA	mmu_piR_033476
mmu_piR_033980	1	piRNA	mmu_piR_033980
mmu_piR_013286	2	piRNA	mmu_piR_013286
mmu_piR_035695	1	piRNA	mmu_piR_035695
mmu_piR_028492	1	piRNA	mmu_piR_028492
mmu_piR_001570	1	piRNA	mmu_piR_001570
mmu-miR-3068-5p	1	mature	mir-3068
mmu_piR_025667	1	piRNA	mmu_piR_025667
mmu-miR-187-3p	29	hairpin	mir-187
mmu-miR-6538	3	mature	undef
mmu_piR_022090	1	piRNA	mmu_piR_022090
mmu-miR-30a-3p	156	hairpin	mir-30
mmu-miR-24-3p	13518	mature	mir-24
mmu_piR_019578	1	piRNA	mmu_piR_019578
mmu-miR-7044-3p	47	mature	undef
mmu_piR_024005	1	piRNA	mmu_piR_024005
mmu_piR_028055	2	piRNA	mmu_piR_028055
mmu-miR-223-5p	128	mature	mir-223
mmu-let-7d-5p	1523	hairpin	let-7
mmu_piR_031289	1	piRNA	mmu_piR_031289
mmu_piR_030459	1	piRNA	mmu_piR_030459
mmu_piR_004751	26	piRNA	mmu_piR_004751
mmu_piR_002696	1	piRNA	mmu_piR_002696
mmu_piR_028436	1	piRNA	mmu_piR_028436
mmu-miR-193a-5p	28	mature	mir-193
mmu-miR-9-5p	3	mature	mir-9
mmu_piR_031334	1	piRNA	mmu_piR_031334
mmu_piR_017242	1	piRNA	mmu_piR_017242
mmu_piR_031021	1	piRNA	mmu_piR_031021
mmu_piR_009521	1	piRNA	mmu_piR_009521
mmu_piR_030299	1	piRNA	mmu_piR_030299
mmu_piR_004944	1	piRNA	mmu_piR_004944
mmu-miR-7028-5p	3	hairpin	undef
mmu_piR_010388	1	piRNA	mmu_piR_010388
mmu_piR_026088	1	piRNA	mmu_piR_026088
mmu_piR_024356	1	piRNA	mmu_piR_024356
mmu_piR_020270	1	piRNA	mmu_piR_020270
mmu_piR_038188	1	piRNA	mmu_piR_038188
mmu_piR_017385	1	piRNA	mmu_piR_017385
mmu_piR_036443	1	piRNA	mmu_piR_036443
mmu_piR_006097	9	piRNA	mmu_piR_006097
mmu-miR-122-5p	2134	mature	mir-122
mmu_piR_008865	1	piRNA	mmu_piR_008865
mmu_piR_000700	1	piRNA	mmu_piR_000700
mmu-miR-196a-5p	89	mature	mir-196
mmu_piR_014293	2	piRNA	mmu_piR_014293
mmu_piR_008116	38	piRNA	mmu_piR_008116
mmu_piR_015629	2	piRNA	mmu_piR_015629
mmu-miR-470-5p	7	hairpin	mir-743
mmu_piR_004587	2	piRNA	mmu_piR_004587
mmu_piR_021077	1	piRNA	mmu_piR_021077
mmu_piR_027963	2	piRNA	mmu_piR_027963
mmu_piR_002175	1	piRNA	mmu_piR_002175
mmu_piR_024691	1	piRNA	mmu_piR_024691
mmu-miR-369-5p	2	mature	mir-154
mmu_piR_011982	1	piRNA	mmu_piR_011982
mmu_piR_014000	2	piRNA	mmu_piR_014000
mmu_piR_038763	1	piRNA	mmu_piR_038763
mmu-miR-24-3p	1746	hairpin	mir-24
mmu-miR-669f-5p	23	hairpin	mir-467
mmu-miR-1198-5p	13722	mature	undef
mmu_piR_001623	1	piRNA	mmu_piR_001623
mmu_piR_005521	1	piRNA	mmu_piR_005521
mmu_piR_024484	1	piRNA	mmu_piR_024484
mmu_piR_010322	1	piRNA	mmu_piR_010322
mmu_piR_010082	1	piRNA	mmu_piR_010082
mmu_piR_027625	2	piRNA	mmu_piR_027625
mmu_piR_019379	1	piRNA	mmu_piR_019379
mmu-miR-1247-5p	27	hairpin	mir-1247
mmu-miR-532-5p	1664	mature	mir-188
mmu_piR_000714	1	piRNA	mmu_piR_000714
mmu_piR_010464	1	piRNA	mmu_piR_010464
mmu_piR_019339	1	piRNA	mmu_piR_019339
mmu_piR_031467	1	piRNA	mmu_piR_031467
mmu-miR-935	698	hairpin	mir-935
mmu_piR_013536	1	piRNA	mmu_piR_013536
mmu_piR_009144	1	piRNA	mmu_piR_009144
mmu_piR_031936	1	piRNA	mmu_piR_031936
mmu_piR_016325	1	piRNA	mmu_piR_016325
mmu_piR_035089	2	piRNA	mmu_piR_035089
mmu_piR_030213	2	piRNA	mmu_piR_030213
mmu-miR-615-3p	115	hairpin	mir-615
mmu_piR_035784	1	piRNA	mmu_piR_035784
mmu_piR_013267	1	piRNA	mmu_piR_013267
mmu_piR_002490	12	piRNA	mmu_piR_002490
mmu_piR_000585	96	piRNA	mmu_piR_000585
mmu-miR-146b-5p	1	mature	mir-146
mmu_piR_019203	2	piRNA	mmu_piR_019203
mmu-miR-434-5p	1	mature	mir-434
mmu_piR_029180	1	piRNA	mmu_piR_029180
mmu-miR-6939-3p	1	hairpin	undef
mmu_piR_021931	3	piRNA	mmu_piR_021931
mmu_piR_007648	1	piRNA	mmu_piR_007648
mmu-miR-1895	1154	hairpin	undef
mmu_piR_029163	1	piRNA	mmu_piR_029163
mmu-miR-3060-5p	1733	hairpin	undef
mmu-miR-96-5p	1	mature	mir-96
mmu_piR_010684	17	piRNA	mmu_piR_010684
mmu_piR_021546	1	piRNA	mmu_piR_021546
mmu-miR-18a-5p	102	hairpin	mir-17
mmu-miR-3102-5p.2-5p	44	hairpin	mir-3102
mmu_piR_016909	1	piRNA	mmu_piR_016909
mmu-miR-203-3p	46	mature	mir-203
mmu_piR_021009	2	piRNA	mmu_piR_021009
mmu_piR_007288	1	piRNA	mmu_piR_007288
mmu_piR_036229	1	piRNA	mmu_piR_036229
mmu_piR_005217	1	piRNA	mmu_piR_005217
mmu_piR_029108	1	piRNA	mmu_piR_029108
mmu_piR_031183	20	piRNA	mmu_piR_031183
mmu_piR_010485	1	piRNA	mmu_piR_010485
mmu-miR-465a-3p,mmu-miR-465b-3p,mmu-miR-465c-3p	14	hairpin	mir-465
mmu-miR-7071-5p	137	hairpin	undef
mmu_piR_038356	1	piRNA	mmu_piR_038356
mmu-miR-744-5p	102	mature	mir-744
mmu_piR_031044	1	piRNA	mmu_piR_031044
mmu_piR_029892	1	piRNA	mmu_piR_029892
mmu-miR-365-3p	23	mature	mir-365
mmu_piR_023107	2	piRNA	mmu_piR_023107
mmu-miR-125b-1-3p	1	hairpin	mir-10
mmu-let-7g-5p	5247	hairpin	let-7
mmu-miR-341-3p	8	mature	mir-341
mmu-miR-331-3p	1	hairpin	mir-331
mmu-miR-409-3p	1	hairpin	mir-154
mmu-miR-668-3p	1	hairpin	mir-668
mmu_piR_020955	1	piRNA	mmu_piR_020955
mmu_piR_031192	1	piRNA	mmu_piR_031192
mmu_piR_013693	13	piRNA	mmu_piR_013693
mmu-let-7e-5p	5	hairpin	let-7
mmu-miR-23a-3p	14353	mature	mir-23
mmu_piR_002536	1	piRNA	mmu_piR_002536
mmu_piR_032659	1	piRNA	mmu_piR_032659
mmu-miR-145a-3p	24	hairpin	mir-145
mmu_piR_029654	1	piRNA	mmu_piR_029654
mmu-miR-6948-3p	1	mature	undef
mmu_piR_007619	3	piRNA	mmu_piR_007619
mmu_piR_000331	1	piRNA	mmu_piR_000331
mmu-miR-17-5p	213	hairpin	mir-17
mmu_piR_023502	1	piRNA	mmu_piR_023502
mmu-miR-100-5p	882	mature	mir-10
mmu-miR-712-3p	130	hairpin	undef
mmu-miR-155-5p	30	mature	mir-155
mmu_piR_018778	1	piRNA	mmu_piR_018778
mmu_piR_030744	1	piRNA	mmu_piR_030744
mmu-miR-466h-3p	18	mature	mir-467
mmu_piR_013385	1	piRNA	mmu_piR_013385
mmu_piR_026610	1	piRNA	mmu_piR_026610
mmu-miR-100-5p	148	hairpin	mir-10
mmu_piR_027722	69	piRNA	mmu_piR_027722
mmu-miR-365-3p	31	hairpin	mir-365
mmu_piR_033238	1	piRNA	mmu_piR_033238
mmu_piR_023997	1	piRNA	mmu_piR_023997
mmu_piR_038748	1	piRNA	mmu_piR_038748
mmu-miR-431-5p	1	hairpin	mir-431
mmu_piR_035659	1	piRNA	mmu_piR_035659
mmu_piR_026864	2	piRNA	mmu_piR_026864
mmu-miR-1a-3p	2	hairpin	mir-1
mmu-miR-193b-3p	249	hairpin	mir-193
mmu-miR-190a-5p	63	hairpin	mir-190
mmu_piR_009131	1	piRNA	mmu_piR_009131
mmu_piR_033915	1	piRNA	mmu_piR_033915
mmu_piR_019273	2	piRNA	mmu_piR_019273
mmu_piR_016217	1	piRNA	mmu_piR_016217
mmu_piR_025406	1	piRNA	mmu_piR_025406
mmu-miR-18a-3p	30	hairpin	mir-17
mmu_piR_014573	1	piRNA	mmu_piR_014573
mmu-miR-140-3p	239	hairpin	mir-140
mmu_piR_000739	1	piRNA	mmu_piR_000739
mmu_piR_000362	18	piRNA	mmu_piR_000362
mmu_piR_012158	1	piRNA	mmu_piR_012158
mmu_piR_031214	1	piRNA	mmu_piR_031214
mmu-miR-145a-5p	136	mature	mir-145
mmu-miR-1981-5p	259	hairpin	undef
mmu_piR_002681	1	piRNA	mmu_piR_002681
mmu-miR-202-3p	35	hairpin	mir-202
mmu-miR-203-3p	81	hairpin	mir-203
mmu-miR-27b-3p	4762	mature	mir-27
mmu-miR-342-3p	550	mature	mir-342
mmu_piR_032251	1	piRNA	mmu_piR_032251
mmu-miR-15a-5p	760	mature	mir-15
mmu_piR_028807	1	piRNA	mmu_piR_028807
mmu_piR_019535	1	piRNA	mmu_piR_019535
mmu-miR-7653-3p	2	hairpin	undef
mmu-miR-149-5p	590	mature	mir-149
mmu_piR_029624	1	piRNA	mmu_piR_029624
mmu_piR_003081	1	piRNA	mmu_piR_003081
mmu_piR_011071	1	piRNA	mmu_piR_011071
mmu-miR-128-3p	2962	mature	mir-128
mmu-miR-6989-3p	29	hairpin	undef
mmu-miR-27a-5p	62	hairpin	mir-27
mmu-miR-7044-3p	2	hairpin	undef
mmu_piR_028986	1	piRNA	mmu_piR_028986
mmu-miR-29a-3p	140	mature	mir-29
mmu-miR-144-3p	483	mature	mir-144
mmu_piR_015619	1	piRNA	mmu_piR_015619
mmu_piR_015837	1	piRNA	mmu_piR_015837
mmu_piR_003245	1	piRNA	mmu_piR_003245
mmu-miR-214-3p	124	hairpin	mir-214
mmu_piR_038322	8	piRNA	mmu_piR_038322
mmu_piR_030588	1	piRNA	mmu_piR_030588
mmu_piR_029587	1	piRNA	mmu_piR_029587
mmu-miR-222-3p	1159	hairpin	mir-221
mmu-miR-3102-5p.2-5p	20	mature	mir-3102
mmu-miR-31-5p	67	mature	mir-31
mmu_piR_005339	1	piRNA	mmu_piR_005339
mmu_piR_027890	1	piRNA	mmu_piR_027890
mmu-miR-31-5p	117	hairpin	mir-31
mmu-miR-872-3p	189	mature	mir-872
mmu_piR_028694	1	piRNA	mmu_piR_028694
mmu-miR-7043-3p	28	mature	undef
mmu_piR_007231	1	piRNA	mmu_piR_007231
mmu-miR-27b-3p	17619	hairpin	mir-27
mmu_piR_031849	19	piRNA	mmu_piR_031849
mmu-let-7b-3p	83	hairpin	let-7
mmu_piR_015422	1	piRNA	mmu_piR_015422
mmu_piR_031625	1	piRNA	mmu_piR_031625
mmu_piR_039784	1	piRNA	mmu_piR_039784
mmu_piR_013359	2	piRNA	mmu_piR_013359
mmu_piR_020143	1	piRNA	mmu_piR_020143
mmu_piR_012353	2	piRNA	mmu_piR_012353
mmu_piR_009878	1	piRNA	mmu_piR_009878
mmu-miR-148a-3p	232	mature	mir-148
mmu-miR-542-5p	410	hairpin	mir-542
mmu_piR_023305	1	piRNA	mmu_piR_023305
mmu_piR_014744	1	piRNA	mmu_piR_014744
mmu-miR-7028-3p	2	hairpin	undef
mmu_piR_020790	1	piRNA	mmu_piR_020790
mmu-miR-98-3p	26	hairpin	let-7
mmu_piR_025007	1	piRNA	mmu_piR_025007
mmu-miR-92b-3p	491	hairpin	mir-25
mmu-miR-598-3p	41	hairpin	mir-598
mmu_piR_016334	1	piRNA	mmu_piR_016334
mmu-miR-384-3p	2	mature	mir-384
mmu_piR_009994	1	piRNA	mmu_piR_009994
mmu_piR_018113	1	piRNA	mmu_piR_018113
mmu_piR_038497	1	piRNA	mmu_piR_038497
mmu_piR_021530	1	piRNA	mmu_piR_021530
mmu_piR_004833	1	piRNA	mmu_piR_004833
mmu_piR_033362	1	piRNA	mmu_piR_033362
mmu_piR_009490	2	piRNA	mmu_piR_009490
mmu-let-7i-3p	159	hairpin	let-7
mmu-miR-669o-5p	25	hairpin	mir-467
mmu-miR-6961-5p	40	hairpin	undef
mmu_piR_031201	1	piRNA	mmu_piR_031201
mmu_piR_011638	2	piRNA	mmu_piR_011638
mmu_piR_005290	1	piRNA	mmu_piR_005290
mmu-miR-5122	9	hairpin	undef
mmu_piR_008443	31	piRNA	mmu_piR_008443
mmu_piR_023797	1	piRNA	mmu_piR_023797
mmu-miR-99b-5p	461	hairpin	mir-10
mmu-miR-145a-5p	277	hairpin	mir-145
mmu_piR_032076	1	piRNA	mmu_piR_032076
mmu_piR_006147	1	piRNA	mmu_piR_006147
mmu_piR_025551	1	piRNA	mmu_piR_025551
mmu_piR_027696	1	piRNA	mmu_piR_027696
mmu_piR_004378	1	piRNA	mmu_piR_004378
mmu-miR-10b-5p	202	hairpin	mir-10
mmu_piR_038323	2	piRNA	mmu_piR_038323
mmu_piR_003274	1	piRNA	mmu_piR_003274
mmu_piR_034580	1	piRNA	mmu_piR_034580
mmu_piR_004203	1	piRNA	mmu_piR_004203
mmu_piR_008340	4	piRNA	mmu_piR_008340
mmu_piR_028830	1	piRNA	mmu_piR_028830
mmu_piR_000028	1	piRNA	mmu_piR_000028
mmu_piR_007646	1	piRNA	mmu_piR_007646
mmu_piR_039982	1	piRNA	mmu_piR_039982
mmu_piR_004090	2	piRNA	mmu_piR_004090
mmu_piR_004534	1	piRNA	mmu_piR_004534
mmu_piR_004059	1	piRNA	mmu_piR_004059
mmu_piR_034909	1	piRNA	mmu_piR_034909
mmu-miR-200a-3p	85	mature	mir-8
mmu_piR_025209	4	piRNA	mmu_piR_025209
mmu_piR_028290	27	piRNA	mmu_piR_028290
mmu_piR_021116	1	piRNA	mmu_piR_021116
mmu_piR_033573	1	piRNA	mmu_piR_033573
mmu_piR_033877	1	piRNA	mmu_piR_033877
mmu_piR_021001	1	piRNA	mmu_piR_021001
mmu_piR_030333	1	piRNA	mmu_piR_030333
mmu-miR-29b-3p	44	hairpin	mir-29
mmu_piR_039194	2	piRNA	mmu_piR_039194
mmu_piR_015400	5	piRNA	mmu_piR_015400
mmu_piR_033229	1	piRNA	mmu_piR_033229
mmu-miR-378c	2	hairpin	undef
mmu_piR_001263	1	piRNA	mmu_piR_001263
mmu-miR-181d-5p	276	mature	mir-181
mmu-miR-125b-5p	979	hairpin	mir-10
mmu_piR_017191	1	piRNA	mmu_piR_017191
mmu-miR-1198-5p	5380	hairpin	undef
mmu_piR_019472	1	piRNA	mmu_piR_019472
mmu-miR-148b-3p	43	mature	mir-148
mmu_piR_001376	1	piRNA	mmu_piR_001376
mmu_piR_036350	1	piRNA	mmu_piR_036350
mmu_piR_020804	1	piRNA	mmu_piR_020804
mmu_piR_034261	2	piRNA	mmu_piR_034261
mmu_piR_036128	15	piRNA	mmu_piR_036128
mmu-miR-195a-5p	68	hairpin	mir-15
mmu_piR_020693	1	piRNA	mmu_piR_020693
mmu-miR-201-5p	2	mature	mir-743
mmu-miR-124-3p	9	hairpin	mir-124
mmu_piR_006780	1	piRNA	mmu_piR_006780
mmu-miR-151-5p	219	hairpin	mir-28
mmu-miR-374b-5p	2	hairpin	mir-374
mmu_piR_006815	1	piRNA	mmu_piR_006815
mmu_piR_029445	1	piRNA	mmu_piR_029445
mmu_piR_006838	1	piRNA	mmu_piR_006838
mmu-miR-122b-5p	30	hairpin	undef
mmu_piR_014945	1	piRNA	mmu_piR_014945
mmu_piR_008098	1	piRNA	mmu_piR_008098
mmu_piR_004185	2	piRNA	mmu_piR_004185
mmu_piR_003867	1	piRNA	mmu_piR_003867
mmu_piR_010508	1	piRNA	mmu_piR_010508
mmu-miR-34b-3p	393	hairpin	mir-34
mmu_piR_021754	1	piRNA	mmu_piR_021754
mmu_piR_038531	1	piRNA	mmu_piR_038531
mmu_piR_010811	1	piRNA	mmu_piR_010811
mmu-miR-205-5p	143	mature	mir-205
mmu_piR_018065	1	piRNA	mmu_piR_018065
mmu-miR-183-5p	364	hairpin	mir-183
mmu_piR_003172	1	piRNA	mmu_piR_003172
mmu_piR_005839	1	piRNA	mmu_piR_005839
mmu-miR-33-5p	34	mature	mir-33
mmu-miR-1251-5p	1	hairpin	mir-1251
mmu_piR_037820	1	piRNA	mmu_piR_037820
mmu-let-7j	82	hairpin	undef
mmu_piR_024157	18	piRNA	mmu_piR_024157
mmu-miR-206-3p	4	hairpin	mir-1
mmu-miR-5100	48	hairpin	undef
mmu_piR_020398	1	piRNA	mmu_piR_020398
mmu_piR_015713	1	piRNA	mmu_piR_015713
mmu_piR_013523	1	piRNA	mmu_piR_013523
mmu_piR_001439	1	piRNA	mmu_piR_001439
mmu_piR_013309	2	piRNA	mmu_piR_013309
mmu_piR_003960	1	piRNA	mmu_piR_003960
mmu-miR-490-5p	69	mature	mir-490
mmu-miR-487b-3p	2	hairpin	mir-154
mmu_piR_000135	1	piRNA	mmu_piR_000135
mmu-miR-219a-2-3p	37	mature	mir-219
mmu_piR_034087	1	piRNA	mmu_piR_034087
mmu_piR_014546	1	piRNA	mmu_piR_014546
mmu_piR_027763	1	piRNA	mmu_piR_027763
mmu-miR-223-5p	30	hairpin	mir-223
mmu_piR_036344	1	piRNA	mmu_piR_036344
mmu-miR-30d-3p	108	hairpin	mir-30
mmu_piR_028546	1	piRNA	mmu_piR_028546
mmu_piR_009385	1	piRNA	mmu_piR_009385
mmu_piR_036969	1	piRNA	mmu_piR_036969
mmu-miR-150-5p	2681	mature	mir-150
mmu_piR_011304	1	piRNA	mmu_piR_011304
mmu_piR_011012	2	piRNA	mmu_piR_011012
mmu_piR_006226	1	piRNA	mmu_piR_006226
mmu-miR-547-3p	2	mature	mir-547
mmu_piR_024617	1	piRNA	mmu_piR_024617
mmu_piR_004271	1	piRNA	mmu_piR_004271
mmu_piR_003837	1	piRNA	mmu_piR_003837
mmu_piR_019616	2	piRNA	mmu_piR_019616
mmu-miR-99b-3p	112	mature	mir-10
mmu-miR-191-3p	256	hairpin	mir-191
mmu_piR_035689	1	piRNA	mmu_piR_035689
mmu_piR_020108	1	piRNA	mmu_piR_020108
mmu-miR-878-5p	2	hairpin	mir-878
mmu_piR_003774	1	piRNA	mmu_piR_003774
mmu_piR_011063	1	piRNA	mmu_piR_011063
mmu_piR_016421	1	piRNA	mmu_piR_016421
mmu_piR_034882	1	piRNA	mmu_piR_034882
mmu-miR-34c-3p	152	mature	mir-34
mmu-miR-409-3p	1	mature	mir-154
mmu_piR_007888	1	piRNA	mmu_piR_007888
mmu_piR_037194	1	piRNA	mmu_piR_037194
mmu_piR_034986	19	piRNA	mmu_piR_034986
mmu_piR_030114	1	piRNA	mmu_piR_030114
mmu_piR_012412	2	piRNA	mmu_piR_012412
mmu_piR_035443	1	piRNA	mmu_piR_035443
mmu_piR_032974	1	piRNA	mmu_piR_032974
mmu_piR_022470	1	piRNA	mmu_piR_022470
mmu_piR_014751	1	piRNA	mmu_piR_014751
mmu_piR_000151	1	piRNA	mmu_piR_000151
mmu_piR_011213	1	piRNA	mmu_piR_011213
mmu_piR_037624	21	piRNA	mmu_piR_037624
mmu-miR-338-3p	1	hairpin	mir-338
mmu_piR_005766	1	piRNA	mmu_piR_005766
mmu-miR-705	1	hairpin	undef
mmu-miR-8114	20	hairpin	undef
mmu_piR_038461	1	piRNA	mmu_piR_038461
mmu_piR_005369	1	piRNA	mmu_piR_005369
mmu_piR_020692	1	piRNA	mmu_piR_020692
mmu-miR-181c-5p	113	hairpin	mir-181
mmu_piR_018323	4	piRNA	mmu_piR_018323
mmu-miR-203b-5p	22	mature	undef
mmu_piR_039951	1	piRNA	mmu_piR_039951
mmu-miR-222-5p	21	hairpin	mir-221
mmu_piR_007293	1	piRNA	mmu_piR_007293
mmu_piR_024799	200	piRNA	mmu_piR_024799
mmu_piR_036754	25	piRNA	mmu_piR_036754
mmu_piR_004901	1	piRNA	mmu_piR_004901
mmu-miR-7075-5p	3	hairpin	undef
mmu_piR_016904	1	piRNA	mmu_piR_016904
mmu_piR_002566	1	piRNA	mmu_piR_002566
mmu_piR_020707	2	piRNA	mmu_piR_020707
mmu-miR-126a-5p	78	mature	mir-126
mmu_piR_003922	1	piRNA	mmu_piR_003922
mmu_piR_027694	1	piRNA	mmu_piR_027694
mmu-miR-465a-3p,mmu-miR-465b-3p,mmu-miR-465c-3p	12	mature	mir-465
mmu-miR-129-5p	3	mature	mir-129
mmu-let-7c-5p	5498	mature	let-7
mmu-miR-378b	112	hairpin	mir-378
mmu_piR_034559	2	piRNA	mmu_piR_034559
mmu_piR_009734	1	piRNA	mmu_piR_009734
mmu_piR_004562	1	piRNA	mmu_piR_004562
mmu_piR_039809	3	piRNA	mmu_piR_039809
mmu_piR_025847	1	piRNA	mmu_piR_025847
mmu_piR_012275	1	piRNA	mmu_piR_012275
mmu_piR_000695	1	piRNA	mmu_piR_000695
mmu-miR-383-5p	4	mature	mir-383
mmu_piR_013932	1	piRNA	mmu_piR_013932
mmu_piR_011755	1	piRNA	mmu_piR_011755
mmu_piR_015641	1	piRNA	mmu_piR_015641
mmu_piR_000819	1	piRNA	mmu_piR_000819
mmu_piR_019336	2	piRNA	mmu_piR_019336
mmu_piR_025824	1	piRNA	mmu_piR_025824
mmu_piR_029012	1	piRNA	mmu_piR_029012
mmu_piR_005717	1	piRNA	mmu_piR_005717
mmu-miR-3077-5p	1	hairpin	undef
mmu-miR-384-5p	2	hairpin	mir-384
mmu_piR_005748	1	piRNA	mmu_piR_005748
mmu_piR_021205	1	piRNA	mmu_piR_021205
mmu_piR_007379	25	piRNA	mmu_piR_007379
mmu_piR_005247	1	piRNA	mmu_piR_005247
mmu_piR_015009	1	piRNA	mmu_piR_015009
mmu_piR_028582	1	piRNA	mmu_piR_028582
mmu_piR_004448	2	piRNA	mmu_piR_004448
mmu-miR-615-5p	138	hairpin	mir-615
mmu-miR-191-5p	29571	mature	mir-191
mmu_piR_023963	1	piRNA	mmu_piR_023963
mmu-miR-339-3p	39	hairpin	mir-339
mmu-miR-142a-5p	118	mature	mir-142
mmu-miR-34c-3p	6	hairpin	mir-34
mmu_piR_032415	1	piRNA	mmu_piR_032415
mmu-miR-378a-3p	2166	hairpin	mir-378
mmu-miR-503-3p	60	hairpin	mir-503
mmu_piR_010287	1	piRNA	mmu_piR_010287
mmu_piR_039010	1	piRNA	mmu_piR_039010
mmu_piR_039082	1	piRNA	mmu_piR_039082
mmu_piR_000336	1	piRNA	mmu_piR_000336
mmu_piR_032967	1	piRNA	mmu_piR_032967
mmu-miR-29b-3p	24	mature	mir-29
mmu_piR_018781	1	piRNA	mmu_piR_018781
mmu_piR_005965	1	piRNA	mmu_piR_005965
mmu-miR-1901	1	hairpin	undef
mmu-miR-20a-5p	244	hairpin	mir-17
mmu_piR_020911	1	piRNA	mmu_piR_020911
RF00051	82	precursor	mir-17 microRNA precursor family
RF00044	1	Rfam other sncRNA	Bacteriophage pRNA
RF00047	1908	precursor	mir-2 microRNA precursor
RF01144	1	snoRNA	Small nucleolar RNA sR17
RF01734	1	Rfam other sncRNA	crcB RNA
RF02475	1	snoRNA	Small nucleolar RNA GlsR6
RF01335	1	Rfam other sncRNA	CRISPR RNA direct repeat element
RF01118	90	rRNA	Pseudoknot of the domain G(G12) of 23S ribosomal RNA
RF02040	1	Rfam other sncRNA	HOXA transcript at the distal tip, conserved region 1
RF00496	28	Rfam other sncRNA	Coronavirus SL-III cis-acting replication element (CRE)
RF01768	13	Rfam other sncRNA	ribosomal frameshift site
RF00658	126	precursor	microRNA mir-21
RF01933	3	Rfam other sncRNA	Bithoraxoid conserved region 5
RF01141	1	snoRNA	Small nucleolar RNA sR18
RF00448	1	Rfam other sncRNA	Epstein-Barr virus nuclear antigen (EBNA) IRES
RF01833	13	Rfam other sncRNA	ribosomal frameshift site
RF00003	1693	snRNA	U1 spliceosomal RNA
RF00752	57	precursor	microRNA mir-14
RF01097	1	Rfam other sncRNA	Gag/pro ribosomal frameshift site
RF00375	34	Rfam other sncRNA	HIV primer binding site (PBS)
RF00071	76	snoRNA	Small nucleolar RNA SNORD73
RF02263	8	Rfam other sncRNA	MAT2A 3'UTR stem loop D
RF00588	2	snoRNA	Small nucleolar RNA SNORD41
RF02282	1	snoRNA	Tetrahymena snoRNA TtnuCD5
RF00844	7	precursor	microRNA mir-67
RF00441	1	snoRNA	Small nucleolar RNA Z242
RF02182	24	Rfam other sncRNA	ST7 antisense RNA 2 conserved region 2
RF00706	274	precursor	microRNA mir-263
RF01534	6	snoRNA	Trypanosomatid snoRNA TB10Cs4H4
RF01687	3	Rfam other sncRNA	Acido-Lenti-1 RNA
RF00891	2	precursor	microRNA mir-671
RF00431	100	snoRNA	Small nucleolar RNA SNORA55
RF00912	155	precursor	microRNA mir-877
RF00674	19	precursor	microRNA mir-187
RF00677	226	precursor	microRNA MIR168
RF01186	1	snoRNA	Small nucleolar RNA SNORD127
RF00657	88	precursor	microRNA mir-184
RF00249	47	precursor	mir-46/mir-47/mir-281 microRNA precursor family
RF00593	27	snoRNA	Small nucleolar RNA U83B
RF00647	16	precursor	microRNA MIR164
RF00517	1	Rfam other sncRNA	serC leader
RF00226	1	Rfam other sncRNA	n-myc internal ribosome entry site (IRES)
RF00567	2	snoRNA	Small nucleolar RNA SNORD17
RF01450	1	snoRNA	small nucleolar RNA snR96
RF01852	86	tRNA	Selenocysteine transfer RNA
RF02246	1	Rfam other sncRNA	Six3os1 conserved region 1
RF01707	154	Rfam other sncRNA	JUMPstart RNA
RF02020	3	precursor	microRNA mir-25
RF00717	12	precursor	microRNA mir-315
RF00217	577	snoRNA	Small nucleolar RNA SNORD20
RF00180	129	Rfam other sncRNA	Renin stability regulatory element (REN-SRE)
RF00231	1	snoRNA	Small Cajal body specific RNA 13
RF01124	29	snoRNA	Small nucleolar RNA sR36
RF02465	1	Rfam other sncRNA	Mycobacterium sRNA Ms_AS-5
RF02406	1	snoRNA	Small nucleolar RNA snoR120
RF01108	1	Rfam other sncRNA	Pseudoknot of upstream pseudoknot domain (UPD) of the 3'UTR
RF02224	32	Rfam other sncRNA	Xanthomonadaceae sRNA sX5
RF01959	152	rRNA	Archaeal small subunit ribosomal RNA
RF00744	60	precursor	microRNA mir-361
RF01785	33	Rfam other sncRNA	ribosomal frameshift site
RF01199	2	snoRNA	Small nucleolar RNA snR58
RF02296	1	snoRNA	Tetrahymena snoRNA TtnuCD20
RF01346	9	Rfam other sncRNA	CRISPR RNA direct repeat element
RF01130	63	snoRNA	Small nucleolar RNA sR46
RF00075	74	precursor	mir-166 microRNA precursor
RF02359	65	Rfam other sncRNA	Bacteriophage MS2 operator hairpin
RF00700	3345	precursor	microRNA mir-375
RF00783	363	precursor	microRNA mir-484
RF00757	80	precursor	microRNA mir-275
RF00695	95	precursor	microRNA MIR398
RF00500	9	Rfam other sncRNA	Turnip crinkle virus (TCV) repressor of minus strand synthesis H5
RF00088	1	snoRNA	Small nucleolar RNA SNORD30
RF00227	1	Rfam other sncRNA	FIE3 (ftz instability element 3') element
RF01356	12	Rfam other sncRNA	CRISPR RNA direct repeat element
RF00287	1	snoRNA	Small nucleolar RNA SNORD44
RF01149	42	snoRNA	Small nucleolar RNA sR10
RF00679	3	precursor	microRNA mir-210
RF00175	1	Rfam other sncRNA	Human immunodeficiency virus type 1 dimerisation initiation site
RF02107	2	Rfam other sncRNA	Deleted in lymphocytic leukemia 2 conserved region 3
RF00662	254	precursor	microRNA mir-132
RF01611	1	snoRNA	Caenorhabditis snoRNA ceN108
RF00076	6180	precursor	mir-181 microRNA precursor
RF01277	16	snoRNA	Small nucleolar RNA U54
RF00412	1	snoRNA	Small nucleolar RNA SNORA21
RF01111	13	Rfam other sncRNA	Pseudoknot of upstream pseudoknot domain (UPD) of the 3'UTR
RF00899	1	precursor	microRNA mir-235
RF00409	1	snoRNA	Small nucleolar RNA SNORA7
RF00619	5	snRNA	U6atac minor spliceosomal RNA
RF02162	5	Rfam other sncRNA	XIST RNA A repeat
RF00656	46	precursor	microRNA mir-205
RF00646	64	precursor	microRNA mir-204
RF00250	2	precursor	Trans-activation response element (TAR)
RF00001	458	rRNA	5S ribosomal RNA
RF01566	1	snoRNA	Dictyostelium snoRNA DdR16
RF02194	122	Rfam other sncRNA	Bacterial antisense RNA HPnc0260
RF00157	2	snoRNA	Small nucleolar RNA SNORD55/SNORD39
RF02543	156894	rRNA	Eukaryotic large subunit ribosomal RNA
RF00767	1	precursor	microRNA mir-150
RF00592	25	snoRNA	Small nucleolar RNA SNORD78
RF00382	23	Rfam other sncRNA	DnaX ribosomal frameshifting element
RF00678	47	precursor	microRNA mir-140
RF00649	4923	precursor	microRNA mir-128
RF02400	17	Rfam other sncRNA	Heat shock protein 83 3' UTR
RF01147	1	snoRNA	Small nucleolar RNA sR12
RF00190	1	snoRNA	Small nucleolar RNA SNORA16B/SNORA16A family
RF00100	16	Rfam other sncRNA	7SK RNA
RF00195	42	Rfam other sncRNA	RsmY RNA family
RF00245	231	precursor	mir-19 microRNA precursor family
RF01677	3	Rfam other sncRNA	Pseudomonas sRNA P35
RF00177	1449	rRNA	Bacterial small subunit ribosomal RNA
RF00192	2	Rfam other sncRNA	Bovine leukaemia virus RNA packaging signal
RF01851	198	Rfam other sncRNA	Cyanobacteria transfer-messenger RNA
RF00711	879	precursor	microRNA mir-449
RF00004	2	snRNA	U2 spliceosomal RNA
RF01022	324	precursor	microRNA mir-611
RF01053	5	Rfam other sncRNA	Deinococcus radiodurans Y RNA
RF01716	287	Rfam other sncRNA	PhotoRC-I RNA
RF00284	1	snoRNA	Small nucleolar RNA SNORD74
RF00653	4	precursor	microRNA mir-22
RF01185	1	snoRNA	Small nucleolar RNA snR75
RF01849	44	Rfam other sncRNA	Alphaproteobacteria transfer-messenger RNA
RF01120	2	snoRNA	Small nucleolar RNA sR33
RF02540	71	rRNA	Archaeal large subunit ribosomal RNA
RF02028	1	precursor	microRNA mir-1827
RF01140	1	snoRNA	Small nucleolar RNA sR20
RF01295	123	snoRNA	Small Cajal body-specific RNA 7
RF00053	532	precursor	mir-7 microRNA precursor
RF01352	2	Rfam other sncRNA	CRISPR RNA direct repeat element
RF01753	580	Rfam other sncRNA	psbNH RNA
RF00216	5	Rfam other sncRNA	c-myc internal ribosome entry site (IRES)
RF00277	7	snoRNA	Small nucleolar RNA SNORD49
RF00292	27	snoRNA	Small nucleolar RNA TBR5
RF00675	336	precursor	microRNA mir-145
RF01068	9	Rfam other sncRNA	mini-ykkC RNA motif
RF00751	1	precursor	microRNA mir-12
RF00144	2153	precursor	mir-199 microRNA precursor
RF01306	47	snoRNA	Small nucleolar RNA sR52
RF00282	1	snoRNA	Small nucleolar RNA SNORD48
RF00289	94	snoRNA	Small nucleolar RNA SNORD104
RF00459	3	Rfam other sncRNA	Mason-Pfizer monkey virus packaging signal
RF00747	13	precursor	microRNA mir-283
RF00690	2	precursor	microRNA MIR408
RF01139	7	snoRNA	Small nucleolar RNA sR2
RF01135	48	snoRNA	Small nucleolar RNA sR24
RF00637	776	precursor	microRNA mir-276
RF00032	1	Rfam other sncRNA	Histone 3' UTR stem-loop
RF00010	23	Rfam other sncRNA	Bacterial RNase P class A
RF00052	250	precursor	lin-4 microRNA precursor
RF01074	2	Rfam other sncRNA	Putative RNA-dependent RNA polymerase ribosomal frameshift site
RF01668	6	Rfam other sncRNA	Pseudomonas sRNA P10
RF00257	44	precursor	mir-194 microRNA precursor family
RF01229	1	snoRNA	Small nucleolar RNA SNORA84
RF00136	1	snoRNA	Small nucleolar RNA SNORD81
RF00533	1	snoRNA	Small nucleolar RNA Me18S-Gm1358
RF02061	8	precursor	microRNA mir-301
RF01811	3	Rfam other sncRNA	Plasmid transferred anti-sense RNA
RF01867	24	Rfam other sncRNA	caulobacter sRNA CC2171
RF01701	1	Rfam other sncRNA	Cyano-1 RNA
RF00655	1	precursor	microRNA mir-28
RF00455	1	precursor	mir-15 microRNA precursor family
RF02553	231	Rfam other sncRNA	Y RNA-like
RF00191	2	snoRNA	Small nucleolar RNA SNORA57
RF00561	1	snoRNA	Small nucleolar RNA SNORA40
RF00671	5	precursor	microRNA mir-138
RF00392	3	snoRNA	Small nucleolar RNA SNORA5
RF01204	1	snoRNA	Small nucleolar RNA snR65
RF01414	7	Rfam other sncRNA	Class I RNA
RF00689	1	precursor	microRNA MIR390
RF01330	1	Rfam other sncRNA	CRISPR RNA direct repeat element
RF01449	9	snoRNA	small nucleolar RNA snR100
RF00644	25788	precursor	microRNA mir-27
RF01904	1	Rfam other sncRNA	HOTAIR conserved region 1
RF00104	483	precursor	mir-10 microRNA precursor family
RF00251	1	precursor	mir-219 microRNA precursor family
RF00756	3	precursor	microRNA mir-299
RF01151	12	snoRNA	Small nucleolar RNA U82P
RF02344	2	Rfam other sncRNA	Alphaproteobacterial ar14
RF01960	389252	rRNA	Eukaryotic small subunit ribosomal RNA
RF00405	18	snoRNA	Small nucleolar RNA SNORA44
RF01131	1	snoRNA	Small nucleolar RNA sR47
RF00017	1577	Rfam other sncRNA	Metazoan signal recognition particle RNA
RF02201	1	Rfam other sncRNA	TTC28 antisense RNA 1 conserved region 4
RF00377	20	snoRNA	Small nucleolar RNA U6-53/MBII-28
RF01506	62	snoRNA	A. fumigatus snoRNA Afu_294
RF01942	1172	precursor	microRNA mir-1937
RF00727	236	precursor	microRNA bantam
RF01382	158	Rfam other sncRNA	HIV-1 stem-loop 4 packaging signal
RF00703	131	precursor	microRNA mir-139
RF00241	2089	precursor	mir-8/mir-141/mir-200 microRNA precursor family
RF01121	1	snoRNA	Small nucleolar RNA sR38
RF01788	2	Rfam other sncRNA	drz-agam-2-2 riboswitch
RF01184	2	snoRNA	Small nucleolar RNA snR79
RF00278	51	snoRNA	Small nucleolar RNA SNORD50
RF01304	60	snoRNA	Small nucleolar RNA sR5
RF01109	1	Rfam other sncRNA	Pseudoknot of upstream pseudoknot domain (UPD) of the 3'UTR
RF02153	14	Rfam other sncRNA	Neighbour of BRCA1 gene 2 converved region
RF00131	2361	precursor	mir-30 microRNA precursor
RF00702	345	precursor	microRNA mir-182
RF02509	14	Rfam other sncRNA	Pyrrolysine insertion sequence mtbB
RF01365	2	Rfam other sncRNA	CRISPR RNA direct repeat element
RF00489	1	Rfam other sncRNA	ctRNA
RF01648	12	snoRNA	Caenorhabditis snoRNA ceN65
RF00221	93	snoRNA	Small nucleolar RNA SNORD43
RF01271	3	snoRNA	Small nucleolar RNA snR30
RF00638	101	precursor	microRNA MIR159
RF01322	9	Rfam other sncRNA	CRISPR RNA direct repeat element
RF00661	93	precursor	microRNA mir-31
RF01549	12	snoRNA	Trypanosomatid snoRNA TB8Cs2H1
RF00784	3069	precursor	microRNA mir-486
RF00254	1912	precursor	mir-16 microRNA precursor family
RF00037	38	Rfam other sncRNA	Iron response element I
RF01850	852	Rfam other sncRNA	Betaproteobacteria transfer-messenger RNA
RF00016	1	snoRNA	Small nucleolar RNA SNORD14
RF00237	33	precursor	mir-9/mir-79 microRNA precursor family
RF02478	1	snoRNA	Small nucleolar RNA GlsR10
RF00099	1	snoRNA	Small nucleolar RNA SNORD22
RF01792	6	Rfam other sncRNA	ribosomal frameshift site
RF02129	21	Rfam other sncRNA	GNAS antisense RNA 1 conserved region 3
RF01675	933	Rfam other sncRNA	Pseudomonas sRNA CrcZ
RF00230	4	Rfam other sncRNA	T-box leader
RF00244	353	precursor	mir-26 microRNA precursor family
RF01762	2	Rfam other sncRNA	Whalefall-1 RNA
RF00746	72	precursor	microRNA mir-454
RF00005	604898	tRNA	tRNA
RF00691	126	precursor	microRNA mir-146
RF01072	6	Rfam other sncRNA	Pseudoknot of upstream pseudoknot domain (UPD) of the 3'UTR
RF02497	1	Rfam other sncRNA	Rhizobiales sRNA Atu_C10
RF00565	3	snoRNA	Small Cajal body specific RNA 3
RF01339	8	Rfam other sncRNA	CRISPR RNA direct repeat element
RF00273	1	snoRNA	Small nucleolar RNA SNORD59
RF02213	1	Rfam other sncRNA	ZFAT antisense RNA 1 conserved region 3
RF00893	1	precursor	microRNA MIR854
RF01550	1	snoRNA	Trypanosomatid snoRNA TB8Cs3H1
RF00442	14	Rfam other sncRNA	ykkC-yxkD leader
RF00011	12	Rfam other sncRNA	Bacterial RNase P class B
RF00027	3483	precursor	let-7 microRNA precursor
RF00618	2	snRNA	U4atac minor spliceosomal RNA
RF00664	1369	precursor	microRNA mir-223
RF02100	1	Rfam other sncRNA	Translational regulator of tfoXVC
RF00129	264	precursor	mir-103/107 microRNA precursor
RF00165	1	Rfam other sncRNA	Coronavirus 3' UTR pseudoknot
RF01519	1	Rfam other sncRNA	Caulobacter sRNA CC0196
RF01338	28	Rfam other sncRNA	CRISPR RNA direct repeat element
RF00396	14	snoRNA	Small nucleolar RNA SNORA13
RF00247	21	precursor	mir-160 microRNA precursor family
RF00871	163	precursor	microRNA mir-689
RF00838	7	precursor	microRNA mir-252
RF00648	84	precursor	microRNA MIR396
RF00630	3	Rfam other sncRNA	Pseudomonas sRNA P26
RF01099	1	Rfam other sncRNA	Pseudoknot of influenza A virus gene
RF02280	1	snoRNA	Tetrahymena snoRNA TtnuCD3
RF00143	13	precursor	mir-6 microRNA precursor
RF01684	8742	Rfam other sncRNA	MALAT1-associated small cytoplasmic RNA/MEN beta RNA
RF02256	1	Rfam other sncRNA	Adaptive response 33 conserved region 2
RF00645	79	precursor	microRNA MIR169_2
RF00009	105	Rfam other sncRNA	Nuclear RNase P
RF00390	8	Rfam other sncRNA	UPSK RNA
RF00049	9	snoRNA	Small nucleolar RNA SNORD36
RF00729	1	precursor	microRNA mir-278
RF01972	2	Rfam other sncRNA	H19 conserved region 1
RF00187	1	snoRNA	Small nucleolar RNA SNORD102
RF00385	2	Rfam other sncRNA	Infectious bronchitis virus D-RNA
RF00683	2	precursor	microRNA mir-143
RF02202	1	Rfam other sncRNA	Urothelial cancer associated 1 conserved region
RF02541	30921	rRNA	Bacterial large subunit ribosomal RNA
RF00229	8	Rfam other sncRNA	Picornavirus internal ribosome entry site (IRES)
RF01290	33	snoRNA	Small nucleolar RNA SNORD10
RF01125	4	snoRNA	Small nucleolar RNA sR4
RF02348	1	Rfam other sncRNA	Trans-activating crRNA
RF00093	12	snoRNA	Small nucleolar RNA SNORD18
RF00103	46	precursor	mir-1 microRNA precursor family
RF00730	1	precursor	microRNA mir-277
RF00722	36535	precursor	microRNA mir-451
RF00669	93	precursor	microRNA mir-96
RF02120	3	Rfam other sncRNA	FTX transcript, XIST regulator conserved region 2
RF01132	1	snoRNA	Small nucleolar RNA sR48
RF00255	1	precursor	mir-218 microRNA precursor family
RF01990	2	Rfam other sncRNA	Selenocysteine insertion sequence 4
RF02444	9	Rfam other sncRNA	Streptococcus sRNA SpR10
RF01402	1	Rfam other sncRNA	STnc150 Hfq binding RNA
RF01296	2	snoRNA	Small nucleolar RNA U85
RF01381	235	Rfam other sncRNA	HIV-1 stem-loop 3 Psi packaging signal
RF01046	21	Rfam other sncRNA	Wingless localisation element 3 (WLE3)
RF01083	1	Rfam other sncRNA	Pseudoknot of upstream pseudoknot domain (UPD) of the 3'UTR
RF02448	11	Rfam other sncRNA	Streptococcus sRNA SpR20
RF01161	3	snoRNA	Small nucleolar RNA SNORD5
RF01895	247	precursor	microRNA mir-193
RF01834	19	Rfam other sncRNA	ribosomal frameshift site
RF01804	11	Rfam other sncRNA	Lambda phage CIII thermoregulator element
RF01791	1	Rfam other sncRNA	F6 TB sRNA
RF01122	6	snoRNA	Small nucleolar RNA sR39
RF01360	40	Rfam other sncRNA	CRISPR RNA direct repeat element
RF01727	1	Rfam other sncRNA	SAM/SAH riboswitch
RF00253	59	precursor	mir-101 microRNA precursor family
[truncated: 78 more rows]

## Sheet: Table S1-model group
sRNA id	Count	Type	Description
mmu-miR-194-5p	44	mature	mir-194
mmu-miR-141-3p	359	hairpin	mir-8
mmu-miR-152-3p	3	mature	mir-148
mmu-miR-501-3p	14	mature	mir-500
mmu_piR_038312	3	piRNA	mmu_piR_038312
mmu_piR_007724	1	piRNA	mmu_piR_007724
mmu-miR-181b-5p	69	mature	mir-181
mmu-miR-700-3p	84	hairpin	undef
mmu-miR-1843a-5p	65	mature	mir-1843
mmu-miR-8112	369	mature	undef
mmu_piR_027112	5	piRNA	mmu_piR_027112
mmu-miR-378a-3p	5879	mature	mir-378
mmu_piR_034482	57	piRNA	mmu_piR_034482
mmu-miR-8116	6	hairpin	undef
mmu_piR_000691	774	piRNA	mmu_piR_000691
mmu-miR-98-3p	1	mature	let-7
mmu_piR_014395	1	piRNA	mmu_piR_014395
mmu_piR_031448	2686	piRNA	mmu_piR_031448
mmu-miR-872-3p	683	hairpin	mir-872
mmu-miR-1298-5p	8	mature	mir-1298
mmu-miR-34c-5p	15	mature	mir-34
mmu_piR_000159	7	piRNA	mmu_piR_000159
mmu-miR-143-3p	4733	hairpin	mir-143
mmu-miR-6948-3p	2	hairpin	undef
mmu-miR-423-5p	221	hairpin	mir-423
mmu-miR-130a-3p	175	mature	mir-130
mmu-miR-551b-3p	1	hairpin	mir-551
mmu-miR-700-5p	119	hairpin	undef
mmu-miR-494-3p	1	mature	mir-154
mmu-miR-142a-3p	19	mature	mir-142
mmu-miR-101a-3p	82	hairpin	mir-101
mmu-miR-17-5p	84	mature	mir-17
mmu-miR-140-3p	337	mature	mir-140
mmu-miR-28a-3p	41	mature	mir-28
mmu-miR-485-5p	26	mature	mir-485
mmu-miR-135a-5p	1	hairpin	mir-135
mmu-miR-5620-5p	4	hairpin	undef
mmu-miR-200b-3p	131	hairpin	mir-8
mmu-miR-701-5p	56	mature	undef
mmu-miR-215-5p	549	mature	mir-192
mmu-miR-26b-5p	1224	mature	mir-26
mmu-miR-20b-5p	148	hairpin	mir-17
mmu-miR-7658-3p	34	hairpin	undef
mmu-miR-375-3p	11632	mature	mir-375
mmu-miR-34b-5p	9	mature	mir-34
mmu-miR-7075-3p	16	mature	undef
mmu_piR_034485	1	piRNA	mmu_piR_034485
mmu-miR-361-5p	77	mature	mir-361
mmu-miR-379-5p	252	mature	mir-379
mmu-miR-99b-5p	1929	mature	mir-10
mmu-miR-223-3p	1648	hairpin	mir-223
mmu-miR-9b-3p	86	mature	undef
mmu-miR-9-5p	2	hairpin	mir-9
mmu-miR-106a-5p	1	hairpin	mir-17
mmu-miR-6236	1	hairpin	undef
mmu-miR-148a-3p	10	hairpin	mir-148
mmu-miR-186-5p	159	mature	mir-186
mmu-miR-15b-5p	1328	hairpin	mir-15
mmu_piR_017718	2	piRNA	mmu_piR_017718
mmu_piR_004222	1	piRNA	mmu_piR_004222
mmu-miR-466f-5p	33	hairpin	mir-467
mmu-miR-199a-3p,mmu-miR-199b-3p	214	mature	mir-199
mmu-miR-23b-5p	1	mature	mir-23
mmu-miR-342-5p	4	mature	mir-342
mmu-let-7f-5p	11708	mature	let-7
mmu-miR-3097-3p	2	mature	undef
mmu-miR-322-5p	312	mature	mir-322
mmu-miR-501-3p	6	hairpin	mir-500
mmu-miR-196a-5p	3	hairpin	mir-196
mmu-miR-574-3p	20	hairpin	mir-574
mmu-miR-25-5p	1	mature	mir-25
mmu-miR-103-3p	10	mature	mir-103
mmu-miR-23b-5p	46	hairpin	mir-23
mmu-miR-30e-3p	265	hairpin	mir-30
mmu_piR_039414	1	piRNA	mmu_piR_039414
mmu-miR-5126	26	mature	undef
mmu-miR-34a-5p	245	hairpin	mir-34
mmu_piR_035188	3	piRNA	mmu_piR_035188
mmu_piR_025576	1184	piRNA	mmu_piR_025576
mmu-miR-195a-3p	1	hairpin	mir-15
mmu-miR-6961-5p	104	mature	undef
mmu-miR-376b-5p	1	mature	mir-368
mmu_piR_039114	85	piRNA	mmu_piR_039114
mmu_piR_015178	1	piRNA	mmu_piR_015178
mmu-miR-1191a	99	hairpin	undef
mmu_piR_036094	5	piRNA	mmu_piR_036094
mmu-miR-210-3p	84	mature	mir-210
mmu-miR-300-5p	1	mature	mir-154
mmu-miR-291a-3p	1	mature	mir-290
mmu-miR-350-3p	54	mature	mir-350
mmu-miR-27a-3p	129033	hairpin	mir-27
mmu-miR-32-5p	12	mature	mir-32
mmu_piR_012829	9	piRNA	mmu_piR_012829
mmu-miR-877-3p	33	hairpin	mir-877
mmu_piR_038428	24	piRNA	mmu_piR_038428
mmu-miR-376b-5p	19	hairpin	mir-368
mmu-miR-328-3p	6355	mature	mir-328
mmu-miR-1943-3p	1	mature	undef
mmu_piR_004830	1	piRNA	mmu_piR_004830
mmu_piR_002643	77	piRNA	mmu_piR_002643
mmu-miR-3074-2-3p	4	hairpin	mir-3074
mmu_piR_009321	1	piRNA	mmu_piR_009321
mmu-miR-467c-5p	15	mature	mir-467
mmu-miR-200c-3p	327	mature	mir-8
mmu-miR-21a-5p	11559	hairpin	mir-21
mmu_piR_006855	1	piRNA	mmu_piR_006855
mmu-miR-322-3p	13	hairpin	mir-322
mmu_piR_019300	3	piRNA	mmu_piR_019300
mmu-miR-877-5p	1117	hairpin	mir-877
mmu-miR-652-3p	9279	mature	mir-652
mmu-miR-485-5p	40	hairpin	mir-485
mmu-miR-126a-3p	7322	mature	mir-126
mmu-let-7c-5p	8471	hairpin	let-7
mmu-miR-210-3p	2	hairpin	mir-210
mmu-miR-31-3p	6	mature	mir-31
mmu-miR-1199-5p	1	hairpin	mir-1199
mmu-miR-92a-1-5p	1	mature	mir-25
mmu-miR-154-3p	2	mature	mir-154
mmu-miR-542-5p	119	mature	mir-542
mmu-miR-429-3p	1981	mature	mir-8
mmu-miR-671-5p	44	hairpin	mir-671
mmu_piR_009848	1	piRNA	mmu_piR_009848
mmu-miR-10b-5p	371	mature	mir-10
mmu-miR-12186-5p	215	mature	undef
mmu-miR-139-5p	1529	hairpin	mir-139
mmu-miR-214-3p	15	mature	mir-214
mmu-miR-5126	13363	hairpin	undef
mmu-miR-26b-3p	1	mature	mir-26
mmu-miR-130a-5p	1	hairpin	mir-130
mmu-miR-487b-3p	53	mature	mir-154
mmu-miR-3962	42	hairpin	undef
mmu-miR-490-3p	4	hairpin	mir-490
mmu-let-7a-5p	12269	mature	let-7
mmu-miR-484	7259	mature	mir-484
mmu-miR-224-5p	2	mature	mir-224
mmu-miR-5116	94	mature	undef
mmu-miR-181b-5p	18	hairpin	mir-181
mmu-let-7a-1-3p,mmu-let-7c-2-3p	562	hairpin	let-7
mmu-miR-322-3p	27	mature	mir-322
mmu-miR-7005-5p	3	hairpin	undef
mmu_piR_035491	1	piRNA	mmu_piR_035491
mmu-miR-7024-3p	1	hairpin	undef
mmu_piR_003461	5	piRNA	mmu_piR_003461
mmu-miR-872-5p	2720	mature	mir-872
mmu-miR-184-3p	108	mature	mir-184
mmu-miR-7052-3p	5	hairpin	undef
mmu-miR-376c-3p	7	hairpin	mir-368
mmu_piR_025120	29	piRNA	mmu_piR_025120
mmu-miR-500-3p	719	mature	mir-500
mmu-miR-25-3p	5419	hairpin	mir-25
mmu-miR-221-3p	42	mature	mir-221
mmu-miR-200b-5p	7	hairpin	mir-8
mmu-miR-20a-5p	113	mature	mir-17
mmu-let-7e-5p	61	mature	let-7
mmu-miR-138-5p	9	hairpin	mir-138
mmu-miR-30c-1-3p	1	hairpin	mir-30
mmu-miR-466i-5p	560	hairpin	mir-467
mmu-miR-8116	182	mature	undef
mmu-miR-5114	1	hairpin	undef
mmu_piR_021541	1	piRNA	mmu_piR_021541
mmu-miR-151-3p	2165	hairpin	mir-28
mmu_piR_012584	30	piRNA	mmu_piR_012584
mmu-miR-17-3p	3	mature	mir-17
mmu-miR-29c-5p	6	hairpin	mir-29
mmu-miR-33-5p	101	hairpin	mir-33
mmu-miR-7662-3p	2	hairpin	undef
mmu-miR-450a-5p	158	hairpin	mir-450
mmu-miR-181a-1-3p	5	hairpin	mir-181
mmu-miR-8112	56	hairpin	undef
mmu-miR-3077-3p	51	mature	undef
mmu-miR-7a-5p	1537	hairpin	mir-7
mmu-miR-200c-3p	259	hairpin	mir-8
mmu-miR-7002-5p	56	hairpin	undef
mmu-miR-193b-5p	1	mature	mir-193
mmu-miR-708-5p	2	hairpin	mir-708
mmu-miR-425-3p	1295	mature	mir-425
mmu-miR-1839-5p	786	mature	mir-1839
mmu_piR_026274	1	piRNA	mmu_piR_026274
mmu_piR_022053	1	piRNA	mmu_piR_022053
mmu-miR-7023-5p	7	hairpin	undef
mmu-miR-19a-3p	6	hairpin	mir-19
mmu-miR-125b-2-3p	1	hairpin	mir-10
mmu-miR-30a-5p	939	hairpin	mir-30
mmu-miR-126a-3p	4028	hairpin	mir-126
mmu-miR-153-3p	6	mature	mir-153
mmu_piR_032066	6	piRNA	mmu_piR_032066
mmu-miR-376a-3p	2	hairpin	mir-368
mmu-miR-186-5p	12	hairpin	mir-186
mmu-miR-150-3p	3	hairpin	mir-150
mmu-miR-6538	1102	hairpin	undef
mmu-miR-142b	1	hairpin	mir-142
mmu_piR_000870	28	piRNA	mmu_piR_000870
mmu-miR-532-5p	211	hairpin	mir-188
mmu-miR-10a-5p	1076	hairpin	mir-10
mmu_piR_014201	6	piRNA	mmu_piR_014201
mmu-miR-434-3p	108	hairpin	mir-434
mmu-miR-3065-5p	1	hairpin	mir-3065
mmu_piR_028051	149	piRNA	mmu_piR_028051
mmu-miR-709	5	mature	undef
mmu_piR_015127	24	piRNA	mmu_piR_015127
mmu_piR_013495	11	piRNA	mmu_piR_013495
mmu-miR-199a-5p	14	hairpin	mir-199
mmu_piR_006156	1	piRNA	mmu_piR_006156
mmu-miR-326-3p	984	mature	mir-326
mmu-miR-341-3p	42	hairpin	mir-341
mmu_piR_003956	1	piRNA	mmu_piR_003956
mmu-miR-421-3p	37	hairpin	mir-95
mmu_piR_000578	1	piRNA	mmu_piR_000578
mmu_piR_012107	2	piRNA	mmu_piR_012107
mmu-miR-19b-3p	733	hairpin	mir-19
mmu-miR-17-3p	2	hairpin	mir-17
mmu-miR-12186-5p	9	hairpin	undef
mmu-miR-132-5p	145	hairpin	mir-132
mmu-miR-6982-3p	2	hairpin	undef
mmu-miR-449a-5p	146	mature	mir-449
mmu_piR_003400	26	piRNA	mmu_piR_003400
mmu-miR-296-3p	2	hairpin	mir-296
mmu-miR-92a-3p	68406	hairpin	mir-25
mmu-miR-199b-5p	3	hairpin	mir-199
mmu-miR-6944-5p	1	hairpin	undef
mmu-miR-148b-3p	2	hairpin	mir-148
mmu_piR_000935	571	piRNA	mmu_piR_000935
mmu-miR-1843a-3p	2	mature	mir-1843
mmu-miR-378b	288	mature	mir-378
mmu-miR-139-3p	67	mature	mir-139
mmu-miR-204-5p	1321	mature	mir-204
mmu-miR-7075-3p	8	hairpin	undef
mmu-miR-328-3p	27046	hairpin	mir-328
mmu_piR_023310	1	piRNA	mmu_piR_023310
mmu-miR-153-3p	11	hairpin	mir-153
mmu_piR_012193	6	piRNA	mmu_piR_012193
mmu_piR_022097	13	piRNA	mmu_piR_022097
mmu-miR-433-3p	1	mature	mir-433
mmu-let-7f-2-3p	804	hairpin	let-7
mmu-miR-181a-5p	5807	hairpin	mir-181
mmu-miR-652-3p	4452	hairpin	mir-652
mmu-miR-215-3p	139	mature	mir-192
mmu-miR-34a-5p	1497	mature	mir-34
mmu-miR-450b-3p	29	mature	mir-450
mmu-miR-30c-5p	502	hairpin	mir-30
mmu-miR-1a-3p	1976	mature	mir-1
mmu-miR-669b-5p	70	hairpin	mir-467
mmu-miR-23b-3p	411	hairpin	mir-23
mmu-miR-342-5p	2	hairpin	mir-342
mmu_piR_023189	76	piRNA	mmu_piR_023189
mmu-miR-669a-3p,mmu-miR-669o-3p	58	mature	mir-467
mmu-miR-211-5p	7	mature	mir-204
mmu_piR_017508	51	piRNA	mmu_piR_017508
mmu-miR-3077-3p	1	hairpin	undef
mmu-miR-411-5p	143	hairpin	mir-379
mmu-miR-503-3p	570	mature	mir-503
mmu-miR-93-5p	1471	mature	mir-17
mmu-miR-1964-5p	1	mature	undef
mmu-miR-190b-5p	30	mature	mir-190
mmu-miR-425-5p	1338	hairpin	mir-425
mmu-miR-100-3p	1	hairpin	mir-10
mmu_piR_015027	3	piRNA	mmu_piR_015027
mmu-miR-324-3p	8	mature	mir-324
mmu-miR-486b-3p	3428	mature	mir-486
mmu-miR-190b-5p	1	hairpin	mir-190
mmu-miR-32-5p	307	hairpin	mir-32
mmu-miR-574-3p	219	mature	mir-574
mmu-miR-133a-3p	325	hairpin	mir-133
mmu_piR_000958	824	piRNA	mmu_piR_000958
mmu-miR-431-5p	2	mature	mir-431
mmu_piR_038400	3	piRNA	mmu_piR_038400
mmu-miR-151-5p	635	mature	mir-28
mmu-miR-486b-3p	858	hairpin	mir-486
mmu-miR-339-3p	5	mature	mir-339
mmu-miR-151-3p	10239	mature	mir-28
mmu-miR-8109	1	hairpin	undef
mmu-miR-574-5p	282	hairpin	mir-574
mmu-miR-1306-3p	204	hairpin	mir-1306
mmu-miR-3079-5p	19	mature	undef
mmu-miR-3063-5p	2	hairpin	undef
mmu-miR-6980-3p	5	hairpin	undef
mmu-miR-133a-3p	232	mature	mir-133
mmu-miR-669a-3p,mmu-miR-669o-3p	1	hairpin	mir-467
mmu-miR-10a-5p	1718	mature	mir-10
mmu-miR-433-3p	3	hairpin	mir-433
mmu_piR_011620	1	piRNA	mmu_piR_011620
mmu-let-7b-5p	9469	hairpin	let-7
mmu-miR-6941-5p	2	hairpin	undef
mmu-miR-324-3p	12	hairpin	mir-324
mmu-miR-7069-3p	7	hairpin	undef
mmu_piR_004658	3	piRNA	mmu_piR_004658
mmu-miR-6980-5p	4	hairpin	undef
mmu-miR-380-3p	51	hairpin	mir-379
mmu_piR_039189	15	piRNA	mmu_piR_039189
mmu-miR-664-3p	51	hairpin	mir-664
mmu-miR-215-3p	272	hairpin	mir-192
mmu-miR-466b-3p,mmu-miR-466c-3p,mmu-miR-466p-3p	1	hairpin	mir-466
mmu-miR-212-5p	47	hairpin	mir-132
mmu-miR-500-3p	22	hairpin	mir-500
mmu_piR_004956	1	piRNA	mmu_piR_004956
mmu-let-7b-5p	10449	mature	let-7
mmu-miR-6964-3p	1	hairpin	undef
mmu-miR-183-5p	155	mature	mir-183
mmu-miR-200a-5p	3	hairpin	mir-8
mmu-miR-6956-3p	43	mature	undef
mmu-miR-29a-3p	3887	hairpin	mir-29
mmu-miR-127-3p	1152	hairpin	mir-127
mmu-miR-24-1-5p	4	hairpin	mir-24
mmu_piR_007549	1	piRNA	mmu_piR_007549
mmu_piR_018409	12	piRNA	mmu_piR_018409
mmu-miR-423-3p	3821	hairpin	mir-423
mmu-miR-26a-5p	1669	hairpin	mir-26
mmu-miR-499-5p	439	mature	mir-499
mmu_piR_004588	1	piRNA	mmu_piR_004588
mmu_piR_014919	5	piRNA	mmu_piR_014919
mmu-miR-30e-3p	17	mature	mir-30
mmu-miR-486a-5p,mmu-miR-486b-5p	34232	mature	mir-486
mmu_piR_020337	7	piRNA	mmu_piR_020337
mmu-miR-16-5p	7256	hairpin	mir-15
mmu-miR-101b-3p	10	hairpin	mir-101
mmu-miR-301a-3p	42	mature	mir-130
mmu-miR-25-5p	213	hairpin	mir-25
mmu-miR-2137	1	hairpin	undef
mmu-miR-486a-3p	479	mature	mir-486
mmu_piR_027980	5	piRNA	mmu_piR_027980
mmu_piR_021085	1	piRNA	mmu_piR_021085
mmu-miR-339-5p	61	mature	mir-339
mmu-miR-382-5p	150	mature	mir-154
mmu-miR-1264-5p	3	mature	mir-95
mmu-miR-200c-5p	2	mature	mir-8
mmu-miR-297a-5p	65	mature	mir-297
mmu_piR_000414	1	piRNA	mmu_piR_000414
mmu_piR_002166	1	piRNA	mmu_piR_002166
mmu-miR-340-3p	39	hairpin	mir-340
mmu-miR-369-3p	2	mature	mir-154
mmu-miR-192-5p	2548	mature	mir-192
mmu-miR-99a-5p	3561	hairpin	mir-10
mmu-miR-335-5p	1	mature	mir-335
mmu-miR-146b-5p	42	hairpin	mir-146
mmu-let-7i-5p	59383	hairpin	let-7
mmu-miR-208a-3p	4	mature	mir-208
mmu-miR-142a-3p	266	hairpin	mir-142
mmu-miR-7094b-2-5p	48	hairpin	mir-7094
mmu_piR_014623	1	piRNA	mmu_piR_014623
mmu-miR-3960	147	hairpin	mir-3960
mmu-miR-495-3p	1	mature	mir-329
mmu_piR_001860	2	piRNA	mmu_piR_001860
mmu-miR-214-5p	6	hairpin	mir-214
mmu-miR-744-5p	211	hairpin	mir-744
mmu-miR-425-5p	146	mature	mir-425
mmu-miR-130b-3p	34	mature	mir-130
mmu-miR-486a-5p,mmu-miR-486b-5p	44056	hairpin	mir-486
mmu-miR-127-3p	3039	mature	mir-127
mmu-miR-195a-5p	24	mature	mir-15
mmu-miR-187-5p	2	hairpin	mir-187
mmu_piR_005109	5	piRNA	mmu_piR_005109
mmu-let-7e-3p	74	hairpin	let-7
mmu-miR-99a-3p	9	hairpin	mir-10
mmu-miR-6941-3p	1	hairpin	undef
mmu-miR-701-5p	40	hairpin	undef
mmu_piR_019200	51	piRNA	mmu_piR_019200
mmu-miR-676-3p	302	hairpin	mir-676
mmu-miR-378c	3	mature	undef
mmu-miR-338-3p	2	mature	mir-338
mmu-miR-673-3p	2	hairpin	mir-673
mmu-miR-224-5p	76	hairpin	mir-224
mmu-miR-350-3p	337	hairpin	mir-350
mmu-miR-25-3p	10617	mature	mir-25
mmu-miR-6956-3p	1	hairpin	undef
mmu-miR-22-5p	1	mature	mir-22
mmu-miR-369-5p	356	hairpin	mir-154
mmu-miR-484	7479	hairpin	mir-484
mmu-miR-429-3p	3312	hairpin	mir-8
mmu-let-7d-3p	2395	mature	let-7
mmu-miR-654-3p	4	hairpin	mir-654
mmu-let-7g-3p	64	hairpin	let-7
mmu-miR-30b-5p	548	mature	mir-30
mmu-let-7f-1-3p	232	hairpin	let-7
mmu-miR-28a-5p	92	mature	mir-28
mmu-miR-212-3p	170	hairpin	mir-132
mmu-miR-141-3p	317	mature	mir-8
mmu_piR_034411	1	piRNA	mmu_piR_034411
mmu_piR_031218	32	piRNA	mmu_piR_031218
mmu-miR-330-5p	254	hairpin	mir-330
mmu-miR-29b-1-5p	30	hairpin	mir-29
mmu_piR_020120	307	piRNA	mmu_piR_020120
mmu-miR-139-3p	351	hairpin	mir-139
mmu-miR-106b-3p	141	hairpin	mir-17
mmu-miR-16-2-3p	48	hairpin	mir-15
mmu_piR_006663	2	piRNA	mmu_piR_006663
mmu-miR-802-3p	12	mature	mir-802
mmu_piR_012500	1	piRNA	mmu_piR_012500
mmu-miR-700-5p	76	mature	undef
mmu-miR-664-3p	1	mature	mir-664
mmu-miR-19b-3p	423	mature	mir-19
mmu-miR-3087-3p	1	hairpin	undef
mmu-miR-503-5p	7	hairpin	mir-503
mmu-miR-3071-5p	1	hairpin	undef
mmu_piR_030130	1	piRNA	mmu_piR_030130
mmu-miR-676-3p	684	mature	mir-676
mmu-miR-21a-5p	20585	mature	mir-21
mmu-let-7d-5p	2627	mature	let-7
mmu-miR-340-3p	1	mature	mir-340
mmu-miR-23b-3p	338	mature	mir-23
mmu-miR-5116	3	hairpin	undef
mmu-miR-330-3p	1	mature	mir-330
mmu-miR-29c-3p	56	mature	mir-29
mmu-miR-1b-5p	740	hairpin	mir-1
mmu-miR-98-5p	503	mature	let-7
mmu-miR-132-5p	32	mature	mir-132
mmu-miR-24-2-5p	323	mature	mir-24
mmu-let-7g-5p	35785	mature	let-7
mmu-miR-411-5p	484	mature	mir-379
mmu-miR-340-5p	101	hairpin	mir-340
mmu-miR-7115-5p	33	hairpin	undef
mmu-miR-101a-5p	1	mature	mir-101
mmu-miR-182-5p	4	hairpin	mir-182
mmu_piR_024345	4	piRNA	mmu_piR_024345
mmu_piR_023693	2	piRNA	mmu_piR_023693
mmu_piR_029541	9	piRNA	mmu_piR_029541
mmu-miR-378d	1170	hairpin	undef
mmu-miR-222-3p	122	mature	mir-221
mmu_piR_035574	1	piRNA	mmu_piR_035574
mmu_piR_010791	3	piRNA	mmu_piR_010791
mmu-miR-7117-3p	28	hairpin	undef
mmu_piR_026137	260	piRNA	mmu_piR_026137
mmu-miR-667-3p	81	hairpin	mir-667
mmu-miR-96-5p	162	hairpin	mir-96
mmu_piR_017405	316	piRNA	mmu_piR_017405
mmu_piR_004048	5	piRNA	mmu_piR_004048
mmu-miR-379-5p	215	hairpin	mir-379
mmu-miR-7a-1-3p	246	mature	mir-7
mmu-miR-193a-5p	6	hairpin	mir-193
mmu-miR-15b-3p	22	mature	mir-15
mmu-miR-6378	1	hairpin	undef
mmu_piR_029343	13	piRNA	mmu_piR_029343
mmu-miR-124-3p	35	mature	mir-124
mmu-miR-296-5p	337	mature	mir-296
mmu-miR-322-5p	1037	hairpin	mir-322
mmu-miR-874-3p	12	mature	mir-874
mmu-miR-342-3p	367	hairpin	mir-342
mmu-miR-7231-5p	1	hairpin	undef
mmu-miR-1983	430	mature	undef
mmu_piR_011141	1	piRNA	mmu_piR_011141
mmu-miR-92a-3p	13383	mature	mir-25
mmu-miR-181a-5p	1563	mature	mir-181
mmu-miR-106b-5p	193	mature	mir-17
mmu-miR-219a-5p	70	hairpin	mir-219
mmu-miR-221-5p	3	mature	mir-221
mmu_piR_039163	3	piRNA	mmu_piR_039163
mmu-miR-181d-3p	27	hairpin	mir-181
mmu-miR-669b-5p	1	mature	mir-467
mmu-miR-582-5p	63	hairpin	mir-582
mmu-miR-101a-3p	8	mature	mir-101
mmu-miR-1964-3p	354	hairpin	undef
mmu-miR-361-5p	232	hairpin	mir-361
mmu_piR_021785	166	piRNA	mmu_piR_021785
mmu-miR-193a-3p	5	mature	mir-193
mmu-miR-378d	2	mature	undef
mmu-miR-466i-5p	118	mature	mir-467
mmu_piR_027178	67	piRNA	mmu_piR_027178
mmu-miR-92b-3p	1125	mature	mir-25
mmu-miR-6395	1	hairpin	undef
mmu-miR-24-2-5p	8	hairpin	mir-24
mmu-miR-493-5p	4	mature	mir-493
mmu-miR-146a-5p	11158	mature	mir-146
mmu_piR_012562	6	piRNA	mmu_piR_012562
mmu-miR-365-2-5p	2	mature	mir-365
mmu-miR-20b-5p	64	mature	mir-17
mmu_piR_018774	1	piRNA	mmu_piR_018774
mmu-miR-467d-5p	89	hairpin	mir-467
mmu-miR-410-3p	61	mature	mir-154
mmu-miR-540-3p	9	mature	mir-540
mmu_piR_015705	7	piRNA	mmu_piR_015705
mmu-let-7i-5p	25081	mature	let-7
mmu_piR_014823	1	piRNA	mmu_piR_014823
mmu_piR_018556	2	piRNA	mmu_piR_018556
mmu-miR-93-5p	20656	hairpin	mir-17
mmu-miR-142a-5p	161	hairpin	mir-142
mmu-miR-30a-5p	874	mature	mir-30
mmu-miR-5129-3p	1	mature	undef
mmu-miR-27a-3p	9027	mature	mir-27
mmu-miR-1249-3p	68	hairpin	mir-1249
mmu-miR-503-5p	48	mature	mir-503
mmu-miR-21a-3p	1	mature	mir-21
mmu-miR-30c-2-3p	3	mature	mir-30
mmu_piR_027673	2	piRNA	mmu_piR_027673
mmu-miR-335-5p	7	hairpin	mir-335
mmu_piR_027208	1	piRNA	mmu_piR_027208
mmu-miR-27b-5p	1	hairpin	mir-27
mmu_piR_005434	3	piRNA	mmu_piR_005434
mmu-miR-3965	3	mature	undef
mmu_piR_034793	5	piRNA	mmu_piR_034793
mmu-miR-181c-5p	249	mature	mir-181
mmu-miR-467d-5p	2	mature	mir-467
mmu-miR-101c	5	hairpin	undef
mmu-miR-299a-3p	1	mature	mir-299
mmu-miR-22-3p	18303	mature	mir-22
mmu_piR_010309	53	piRNA	mmu_piR_010309
mmu-miR-3068-5p	4	mature	mir-3068
mmu-miR-497a-5p	351	hairpin	mir-497
mmu-miR-187-3p	195	hairpin	mir-187
mmu-miR-320-3p	1561	hairpin	mir-320
mmu-miR-6538	292	mature	undef
mmu-miR-29c-3p	124	hairpin	mir-29
mmu-miR-323-3p	1	mature	mir-154
mmu-miR-183-3p	1	hairpin	mir-183
mmu-miR-24-3p	222021	mature	mir-24
mmu-miR-30a-3p	611	hairpin	mir-30
mmu-miR-31-3p	16	hairpin	mir-31
mmu-miR-184-3p	1147	hairpin	mir-184
mmu-miR-223-5p	207	mature	mir-223
mmu_piR_024749	2	piRNA	mmu_piR_024749
mmu-let-7d-5p	3373	hairpin	let-7
mmu-miR-467b-5p	44	hairpin	mir-467
mmu-miR-451a	100143	mature	mir-451
mmu-miR-199a-3p,mmu-miR-199b-3p	12019	hairpin	mir-199
mmu_piR_017510	5	piRNA	mmu_piR_017510
mmu-miR-708-5p	2	mature	mir-708
mmu-miR-1839-5p	1352	hairpin	mir-1839
mmu-miR-193a-5p	1	mature	mir-193
mmu-miR-9-5p	7	mature	mir-9
mmu-miR-328-5p	1	mature	mir-328
mmu-miR-450b-5p	2	mature	mir-450
mmu-miR-1943-5p	1	hairpin	undef
mmu_piR_011543	1	piRNA	mmu_piR_011543
mmu_piR_000868	3	piRNA	mmu_piR_000868
mmu-miR-206-3p	4885	mature	mir-1
mmu-miR-1224-5p	1	hairpin	mir-1224
mmu-miR-30c-2-3p	5	hairpin	mir-30
mmu-miR-290b-3p	5	hairpin	undef
mmu_piR_026529	4	piRNA	mmu_piR_026529
mmu-miR-221-3p	590	hairpin	mir-221
mmu-miR-1b-3p	1	hairpin	mir-1
mmu-miR-122-5p	8709	mature	mir-122
mmu-miR-27a-5p	2	mature	mir-27
mmu-miR-126a-5p	172	hairpin	mir-126
mmu-miR-181d-5p	527	hairpin	mir-181
mmu-miR-128-3p	5788	hairpin	mir-128
mmu-miR-196a-5p	69	mature	mir-196
mmu-miR-1298-5p	16	hairpin	mir-1298
mmu-let-7d-3p	7177	hairpin	let-7
mmu-miR-543-3p	51	hairpin	mir-329
mmu-miR-7067-5p	7	hairpin	undef
mmu-miR-302a-3p	1	mature	mir-302
mmu-miR-106b-5p	166	hairpin	mir-17
mmu-miR-5099	2	hairpin	undef
mmu-miR-369-5p	1	mature	mir-154
mmu-miR-188-5p	1	mature	mir-188
mmu-miR-134-5p	1	mature	mir-134
mmu-miR-182-5p	15	mature	mir-182
mmu-miR-24-3p	87047	hairpin	mir-24
mmu-miR-1198-5p	88237	mature	undef
mmu_piR_016587	1	piRNA	mmu_piR_016587
mmu-miR-152-3p	31	hairpin	mir-148
mmu-miR-1247-5p	253	hairpin	mir-1247
mmu-miR-674-5p	78	hairpin	mir-674
mmu-miR-449a-5p	40	hairpin	mir-449
mmu_piR_027739	1	piRNA	mmu_piR_027739
mmu-miR-340-5p	130	mature	mir-340
mmu_piR_016706	1	piRNA	mmu_piR_016706
mmu_piR_038761	74	piRNA	mmu_piR_038761
mmu-miR-494-3p	1	hairpin	mir-154
mmu_piR_000640	16	piRNA	mmu_piR_000640
mmu_piR_015306	7	piRNA	mmu_piR_015306
mmu-miR-935	8	hairpin	mir-935
mmu-miR-132-3p	4	hairpin	mir-132
mmu-miR-5119	2	hairpin	undef
mmu-miR-15a-3p	77	hairpin	mir-15
mmu-miR-19a-3p	33	mature	mir-19
mmu-miR-154-5p	149	hairpin	mir-154
mmu_piR_003300	1	piRNA	mmu_piR_003300
mmu_piR_027471	41	piRNA	mmu_piR_027471
mmu_piR_000585	6	piRNA	mmu_piR_000585
mmu-miR-434-5p	2	mature	mir-434
mmu-miR-146b-5p	9	mature	mir-146
mmu-miR-328-5p	7	hairpin	mir-328
mmu-miR-30a-3p	73	mature	mir-30
mmu-miR-496a-3p	1	mature	mir-154
mmu-miR-1895	956	hairpin	undef
mmu-miR-3060-5p	28	hairpin	undef
mmu-miR-199a-5p	65	mature	mir-199
mmu-miR-96-5p	20	mature	mir-96
mmu-miR-154-5p	444	mature	mir-154
mmu-miR-125b-1-3p	4	mature	mir-10
mmu-miR-7a-5p	707	mature	mir-7
mmu-miR-18a-5p	58	hairpin	mir-17
mmu-miR-497a-5p	95	mature	mir-497
mmu-miR-337-3p	1	mature	mir-337
mmu-miR-128-2-5p	2	hairpin	mir-128
mmu-miR-203-3p	85	mature	mir-203
mmu-miR-335-3p	1	mature	mir-335
mmu-miR-300-3p	1	mature	mir-154
mmu_piR_031183	8	piRNA	mmu_piR_031183
mmu-miR-465a-3p,mmu-miR-465b-3p,mmu-miR-465c-3p	39	hairpin	mir-465
mmu_piR_006857	4	piRNA	mmu_piR_006857
mmu-miR-99a-5p	10073	mature	mir-10
mmu-let-7a-2-3p	1	hairpin	let-7
mmu-miR-3098-3p	1	hairpin	undef
mmu-miR-744-5p	16	mature	mir-744
mmu-miR-365-3p	44	mature	mir-365
mmu-miR-1843b-3p	1	hairpin	mir-1843
mmu-miR-34c-5p	37	hairpin	mir-34
mmu-let-7g-5p	19837	hairpin	let-7
mmu-miR-341-3p	128	mature	mir-341
mmu-miR-351-5p	3	hairpin	mir-351
mmu-miR-409-3p	1	hairpin	mir-154
mmu_piR_026900	1	piRNA	mmu_piR_026900
mmu-miR-6978-3p	1	mature	undef
mmu-miR-1981-5p	1	mature	undef
mmu_piR_013693	1	piRNA	mmu_piR_013693
mmu-let-7e-5p	84	hairpin	let-7
mmu-miR-23a-3p	10482	mature	mir-23
mmu_piR_036827	1	piRNA	mmu_piR_036827
mmu_piR_006776	59	piRNA	mmu_piR_006776
mmu_piR_000209	4	piRNA	mmu_piR_000209
mmu-miR-145a-3p	53	hairpin	mir-145
mmu-miR-382-5p	39	hairpin	mir-154
mmu-miR-6948-3p	30	mature	undef
mmu-miR-17-5p	130	hairpin	mir-17
mmu-miR-100-5p	1374	mature	mir-10
mmu-miR-375-3p	3309	hairpin	mir-375
mmu-miR-30e-5p	189	hairpin	mir-30
mmu-miR-155-5p	8	mature	mir-155
mmu-miR-712-3p	351	hairpin	undef
mmu-miR-466h-3p	1	mature	mir-467
mmu-miR-200b-5p	8	mature	mir-8
mmu-miR-26b-3p	1	hairpin	mir-26
mmu-miR-100-5p	397	hairpin	mir-10
mmu_piR_012168	1	piRNA	mmu_piR_012168
mmu_piR_027722	4	piRNA	mmu_piR_027722
mmu-miR-365-3p	40	hairpin	mir-365
mmu-miR-1194	1	hairpin	undef
mmu_piR_028975	204	piRNA	mmu_piR_028975
mmu-miR-7045-5p	1	hairpin	undef
mmu_piR_003797	3	piRNA	mmu_piR_003797
mmu-miR-335-3p	24	hairpin	mir-335
mmu-miR-144-5p	1	mature	mir-144
mmu-miR-150-5p	1428	hairpin	mir-150
mmu-miR-1a-3p	113	hairpin	mir-1
mmu-miR-190a-5p	2	hairpin	mir-190
mmu-miR-193b-3p	110	hairpin	mir-193
mmu-miR-1306-3p	103	mature	mir-1306
mmu_piR_017993	8	piRNA	mmu_piR_017993
mmu_piR_014306	7	piRNA	mmu_piR_014306
mmu_piR_033077	69	piRNA	mmu_piR_033077
mmu-miR-362-3p	1	hairpin	mir-362
mmu-miR-330-3p	1	hairpin	mir-330
mmu-miR-18a-3p	98	hairpin	mir-17
mmu-miR-1934-5p	30	hairpin	undef
mmu-miR-450a-5p	12	mature	mir-450
mmu-miR-140-3p	1081	hairpin	mir-140
mmu_piR_031473	7	piRNA	mmu_piR_031473
mmu-let-7k	2	mature	undef
mmu-miR-574-5p	6	mature	mir-574
mmu-miR-1981-5p	645	hairpin	undef
mmu-miR-1983	271	hairpin	undef
mmu-miR-145a-5p	303	mature	mir-145
mmu-miR-145a-3p	29	mature	mir-145
mmu-miR-103-3p	137	hairpin	mir-103
mmu-miR-203-3p	92	hairpin	mir-203
mmu-miR-27b-3p	3119	mature	mir-27
mmu_piR_016464	2	piRNA	mmu_piR_016464
mmu-miR-434-3p	22	mature	mir-434
mmu-miR-342-3p	128	mature	mir-342
mmu-miR-450a-1-3p	1	hairpin	mir-450
mmu-miR-540-3p	2	hairpin	mir-540
mmu-miR-7682-3p	29	mature	undef
mmu-miR-15a-5p	587	mature	mir-15
mmu-let-7k	38379	hairpin	undef
mmu-miR-30c-1-3p	1	mature	mir-30
mmu_piR_005874	2	piRNA	mmu_piR_005874
mmu-miR-149-5p	228	mature	mir-149
mmu-miR-218-5p	111	hairpin	mir-218
mmu-miR-193a-3p	10	hairpin	mir-193
mmu-miR-28a-5p	16	hairpin	mir-28
mmu-miR-204-5p	320	hairpin	mir-204
mmu-miR-466c-5p	1	hairpin	mir-466
mmu-miR-467a-5p	16	mature	mir-467
mmu-miR-155-5p	8	hairpin	mir-155
mmu-miR-128-3p	1918	mature	mir-128
mmu-miR-3473a	71	hairpin	mir-3473
mmu-miR-582-5p	1	mature	mir-582
mmu-miR-27a-5p	55	hairpin	mir-27
mmu-miR-29a-3p	418	mature	mir-29
mmu-miR-1843b-5p	130	hairpin	mir-1843
mmu-miR-144-3p	650	mature	mir-144
mmu-miR-345-5p	116	hairpin	mir-345
mmu-miR-455-5p	3	mature	mir-455
mmu_piR_003245	2	piRNA	mmu_piR_003245
mmu-miR-214-3p	235	hairpin	mir-214
mmu_piR_038322	1	piRNA	mmu_piR_038322
mmu-miR-802-3p	2	hairpin	mir-802
mmu_piR_039386	7	piRNA	mmu_piR_039386
mmu-let-7f-5p	6646	hairpin	let-7
mmu-miR-6937-3p	3	hairpin	undef
mmu-miR-143-5p	1	mature	mir-143
mmu-miR-181c-3p	3	hairpin	mir-181
mmu-miR-137-3p	1	mature	mir-137
mmu-miR-22-3p	16267	hairpin	mir-22
mmu-miR-26b-5p	645	hairpin	mir-26
mmu_piR_033349	1	piRNA	mmu_piR_033349
mmu-miR-222-3p	1495	hairpin	mir-221
mmu-miR-3084-5p	25	mature	mir-3084
mmu-miR-3102-5p.2-5p	2	mature	mir-3102
mmu-miR-135b-5p	1	mature	mir-135
mmu_piR_000989	7	piRNA	mmu_piR_000989
mmu_piR_003377	4	piRNA	mmu_piR_003377
mmu-miR-31-5p	52	mature	mir-31
mmu-miR-376a-3p	3	mature	mir-368
mmu-miR-345-5p	1	mature	mir-345
mmu-miR-31-5p	69	hairpin	mir-31
mmu-miR-8102	1	hairpin	undef
mmu-miR-872-3p	876	mature	mir-872
mmu_piR_017341	17	piRNA	mmu_piR_017341
mmu-miR-451a	164409	hairpin	mir-451
mmu-miR-214-5p	2	mature	mir-214
mmu-miR-194-5p	7805	hairpin	mir-194
mmu_piR_032714	5	piRNA	mmu_piR_032714
mmu-miR-6970-3p	1	hairpin	undef
mmu-miR-323-3p	2	hairpin	mir-154
mmu-miR-30d-5p	3858	hairpin	mir-30
mmu-miR-140-5p	379	mature	mir-140
mmu_piR_031849	1	piRNA	mmu_piR_031849
mmu-miR-27b-3p	17995	hairpin	mir-27
mmu-miR-30b-5p	307	hairpin	mir-30
mmu-let-7b-3p	91	hairpin	let-7
mmu-miR-133b-3p	1	hairpin	mir-133
mmu-miR-3074-2-3p	174	mature	mir-3074
mmu-miR-542-5p	512	hairpin	mir-542
mmu-miR-148a-3p	358	mature	mir-148
mmu-miR-7a-1-3p	196	hairpin	mir-7
mmu-miR-1843a-5p	169	hairpin	mir-1843
mmu-miR-3084-3p	134	hairpin	mir-3084
mmu-miR-196b-5p	316	hairpin	mir-196
mmu-miR-6935-3p	26	hairpin	undef
mmu-miR-425-3p	2201	hairpin	mir-425
mmu_piR_025007	4	piRNA	mmu_piR_025007
mmu_piR_013797	3	piRNA	mmu_piR_013797
mmu-miR-92b-3p	697	hairpin	mir-25
mmu-miR-486a-3p	138	hairpin	mir-486
mmu-miR-93-3p	1	hairpin	mir-17
mmu-let-7f-2-3p	37	mature	let-7
mmu_piR_038284	1	piRNA	mmu_piR_038284
mmu-miR-344-3p	2	mature	mir-344
mmu-miR-598-3p	131	hairpin	mir-598
mmu-miR-200b-3p	91	mature	mir-8
mmu-miR-149-5p	1791	hairpin	mir-149
mmu-miR-219c-3p	1	hairpin	undef
mmu-miR-1843a-3p	137	hairpin	mir-1843
mmu-miR-3535	1	mature	mir-3535
mmu-let-7i-3p	271	hairpin	let-7
mmu-miR-669o-5p	13	hairpin	mir-467
mmu-miR-6961-5p	1	hairpin	undef
mmu-miR-467a-5p	2	hairpin	mir-467
mmu-miR-1191a	1	mature	undef
mmu-miR-423-5p	800	mature	mir-423
mmu_piR_011535	1	piRNA	mmu_piR_011535
mmu-miR-466g	1	hairpin	mir-467
mmu-miR-30d-5p	8805	mature	mir-30
mmu-miR-5122	1	hairpin	undef
mmu-miR-221-5p	2	hairpin	mir-221
mmu-miR-1199-3p	1	hairpin	mir-1199
mmu-miR-6971-3p	24	mature	undef
mmu-miR-99b-5p	965	hairpin	mir-10
mmu_piR_006956	6	piRNA	mmu_piR_006956
mmu-miR-145a-5p	44	hairpin	mir-145
mmu-miR-320-3p	704	mature	mir-320
mmu-miR-223-3p	1446	mature	mir-223
mmu-miR-140-5p	364	hairpin	mir-140
mmu-miR-376b-3p	49	hairpin	mir-368
mmu-miR-3060-3p	30	hairpin	undef
mmu_piR_001527	7	piRNA	mmu_piR_001527
mmu-miR-34b-3p	24	mature	mir-34
mmu_piR_004378	1	piRNA	mmu_piR_004378
mmu-miR-10b-5p	34	hairpin	mir-10
mmu_piR_038323	13	piRNA	mmu_piR_038323
mmu_piR_031491	8	piRNA	mmu_piR_031491
mmu_piR_017408	1	piRNA	mmu_piR_017408
mmu-miR-7117-5p	34	hairpin	undef
mmu-miR-301a-3p	159	hairpin	mir-130
mmu-miR-130b-3p	265	hairpin	mir-130
mmu-miR-28a-3p	73	hairpin	mir-28
mmu-miR-672-5p	1	mature	mir-672
mmu-let-7a-1-3p,mmu-let-7c-2-3p	27	mature	let-7
mmu_piR_013682	55	piRNA	mmu_piR_013682
mmu-miR-196b-5p	6456	mature	mir-196
mmu-miR-3110-5p	2	hairpin	undef
mmu-miR-339-5p	1	hairpin	mir-339
mmu-miR-187-3p	115	mature	mir-187
mmu-miR-1198-3p	179	hairpin	undef
mmu-miR-30e-5p	78	mature	mir-30
mmu-miR-187-5p	1	mature	mir-187
mmu-miR-744-3p	1	hairpin	mir-744
mmu_piR_024901	2	piRNA	mmu_piR_024901
mmu-miR-511-3p	18	hairpin	mir-506
mmu-miR-200a-3p	132	mature	mir-8
mmu_piR_015243	2	piRNA	mmu_piR_015243
mmu-miR-879-5p	32	mature	mir-879
mmu-let-7e-3p	1	mature	let-7
mmu-miR-98-5p	2249	hairpin	let-7
mmu-miR-10a-3p	5	hairpin	mir-10
mmu-miR-29b-3p	73	hairpin	mir-29
mmu-miR-3071-3p	1	hairpin	undef
mmu_piR_034545	3	piRNA	mmu_piR_034545
mmu-miR-136-3p	3	hairpin	mir-136
mmu-miR-125a-5p	34	mature	mir-10
mmu-miR-378c	1	hairpin	undef
mmu-miR-208b-3p	2	hairpin	mir-208
mmu-miR-130b-5p	2	mature	mir-130
mmu-miR-92b-5p	1	mature	mir-25
mmu-miR-181d-5p	465	mature	mir-181
mmu-miR-6980-3p	41	mature	undef
mmu_piR_020770	1	piRNA	mmu_piR_020770
mmu-miR-296-5p	125	hairpin	mir-296
mmu-miR-125b-5p	3304	hairpin	mir-10
mmu-miR-376c-5p	1	hairpin	mir-368
mmu-miR-1198-5p	22200	hairpin	undef
mmu-miR-148b-3p	91	mature	mir-148
mmu-miR-1839-3p	167	hairpin	mir-1839
mmu-miR-874-3p	2	hairpin	mir-874
mmu-miR-3572-3p	6	mature	mir-3572
mmu-miR-195a-5p	103	hairpin	mir-15
mmu-miR-7045-3p	3	hairpin	undef
mmu-miR-29a-5p	6	hairpin	mir-29
mmu-miR-1938	5	hairpin	undef
mmu_piR_008241	1	piRNA	mmu_piR_008241
mmu-miR-181a-2-3p	302	hairpin	mir-181
mmu-miR-124-3p	552	hairpin	mir-124
mmu-miR-6418-3p	2	mature	undef
mmu-miR-378a-5p	1	hairpin	mir-378
mmu_piR_027027	4	piRNA	mmu_piR_027027
mmu-miR-146a-5p	5261	hairpin	mir-146
mmu-miR-362-5p	1	mature	mir-362
mmu-miR-3074-1-3p	2	hairpin	mir-3074
mmu-miR-466k	16	hairpin	mir-466
mmu-miR-138-5p	56	mature	mir-138
mmu-miR-151-5p	1032	hairpin	mir-28
mmu-miR-374b-5p	84	hairpin	mir-374
mmu-miR-351-5p	5	mature	mir-351
mmu-miR-122-3p	12	hairpin	mir-122
mmu-miR-144-3p	1324	hairpin	mir-144
mmu-miR-15b-3p	211	hairpin	mir-15
mmu_piR_008134	2	piRNA	mmu_piR_008134
mmu_piR_028107	27	piRNA	mmu_piR_028107
mmu-miR-34b-3p	132	hairpin	mir-34
mmu-miR-205-5p	14	mature	mir-205
mmu-miR-30c-5p	113	mature	mir-30
mmu-miR-381-3p	5	mature	mir-154
mmu-miR-136-5p	1	mature	mir-136
mmu-miR-3087-3p	29	mature	undef
mmu-miR-193b-3p	594	mature	mir-193
mmu-miR-183-5p	295	hairpin	mir-183
mmu-miR-181a-1-3p	6	mature	mir-181
mmu-miR-33-5p	61	mature	mir-33
mmu-let-7j	327	hairpin	undef
mmu-miR-199b-5p	4	mature	mir-199
mmu-miR-674-5p	4	mature	mir-674
mmu-miR-206-3p	403	hairpin	mir-1
mmu-miR-5100	105	hairpin	undef
mmu_piR_019253	30	piRNA	mmu_piR_019253
mmu-miR-139-5p	3190	mature	mir-139
mmu-let-7a-5p	7922	hairpin	let-7
mmu-miR-200a-3p	432	hairpin	mir-8
mmu-miR-135b-5p	1	hairpin	mir-135
mmu-miR-142b	17	mature	mir-142
mmu-miR-490-5p	5	mature	mir-490
mmu-miR-323-5p	1	hairpin	mir-154
mmu-miR-487b-3p	34	hairpin	mir-154
mmu-miR-26a-2-3p	1	hairpin	mir-26
mmu_piR_037005	2	piRNA	mmu_piR_037005
mmu-miR-6769b-5p	14	hairpin	undef
mmu-miR-219a-2-3p	54	mature	mir-219
mmu_piR_023098	1	piRNA	mmu_piR_023098
mmu-miR-223-5p	1	hairpin	mir-223
mmu-miR-3057-5p	30	hairpin	undef
mmu-miR-30d-3p	6	hairpin	mir-30
mmu-miR-669m-5p,mmu-miR-466m-5p	1	hairpin	mir-467
mmu-miR-125b-5p	597	mature	mir-10
mmu_piR_023529	1	piRNA	mmu_piR_023529
mmu-miR-1932	3	hairpin	undef
mmu-miR-150-5p	7006	mature	mir-150
mmu_piR_002597	1	piRNA	mmu_piR_002597
mmu-miR-467h	2	hairpin	mir-467
mmu-miR-23a-3p	27921	hairpin	mir-23
mmu-miR-671-5p	2	mature	mir-671
mmu-miR-7073-3p	1	hairpin	undef
mmu-let-7i-3p	28	mature	let-7
mmu-miR-99b-3p	3	mature	mir-10
mmu-miR-3470b	177	hairpin	mir-3470
mmu-miR-191-3p	382	hairpin	mir-191
mmu-miR-34c-3p	78	mature	mir-34
mmu-miR-409-3p	2	mature	mir-154
mmu-miR-877-5p	157	mature	mir-877
mmu-miR-7073-5p	4	hairpin	undef
mmu-miR-200a-5p	8	mature	mir-8
mmu-miR-99b-3p	87	hairpin	mir-10
mmu_piR_032974	3	piRNA	mmu_piR_032974
mmu-miR-7119-3p	23	hairpin	undef
mmu_piR_015252	10	piRNA	mmu_piR_015252
mmu-miR-374b-5p	88	mature	mir-374
mmu-miR-203b-3p	1	hairpin	undef
mmu_piR_012135	10	piRNA	mmu_piR_012135
mmu-miR-378a-5p	7	mature	mir-378
mmu_piR_037624	8	piRNA	mmu_piR_037624
mmu-miR-338-3p	1	hairpin	mir-338
mmu_piR_024446	1	piRNA	mmu_piR_024446
mmu-miR-22-5p	105	hairpin	mir-22
mmu_piR_004086	1	piRNA	mmu_piR_004086
mmu-miR-122-5p	1445	hairpin	mir-122
mmu_piR_000273	2	piRNA	mmu_piR_000273
mmu-miR-6910-5p	1	hairpin	undef
mmu-miR-669o-5p	3	mature	mir-467
mmu-miR-705	4	hairpin	undef
mmu-miR-8114	68	hairpin	undef
mmu-miR-455-5p	38	hairpin	mir-455
mmu-miR-26a-5p	5180	mature	mir-26
mmu-miR-455-3p	4	hairpin	mir-455
mmu_piR_020692	1	piRNA	mmu_piR_020692
mmu-miR-181c-5p	53	hairpin	mir-181
mmu-miR-99a-3p	2	mature	mir-10
mmu-miR-16-5p	26685	mature	mir-15
mmu_piR_018323	47	piRNA	mmu_piR_018323
mmu_piR_035060	1	piRNA	mmu_piR_035060
mmu-miR-218-5p	172	mature	mir-218
mmu-miR-203b-5p	3	mature	undef
mmu_piR_000616	1	piRNA	mmu_piR_000616
mmu-miR-191-5p	3373	hairpin	mir-191
mmu_piR_011988	11	piRNA	mmu_piR_011988
mmu_piR_024799	8	piRNA	mmu_piR_024799
mmu-miR-185-5p	1775	hairpin	mir-185
mmu-miR-324-5p	4	hairpin	mir-324
mmu-miR-5123	170	hairpin	undef
mmu-miR-7075-5p	1	hairpin	undef
mmu-miR-324-5p	2	mature	mir-324
mmu-miR-126a-5p	297	mature	mir-126
mmu-miR-350-5p	1	mature	mir-350
mmu-miR-6954-3p	1	mature	undef
mmu-miR-143-3p	6266	mature	mir-143
mmu-miR-410-3p	1	hairpin	mir-154
mmu-miR-378b	960	hairpin	mir-378
mmu-let-7c-5p	27891	mature	let-7
mmu_piR_017040	1	piRNA	mmu_piR_017040
mmu-miR-7032-5p	3	hairpin	undef
mmu-miR-215-5p	1473	hairpin	mir-192
mmu_piR_000695	1	piRNA	mmu_piR_000695
mmu_piR_013932	18	piRNA	mmu_piR_013932
mmu-miR-208b-3p	1	mature	mir-208
mmu_piR_018558	2	piRNA	mmu_piR_018558
mmu-miR-130a-3p	648	hairpin	mir-130
mmu-miR-7b-5p	1	mature	mir-7
mmu-miR-499-5p	132	hairpin	mir-499
mmu-miR-15a-5p	124	hairpin	mir-15
mmu_piR_009075	1	piRNA	mmu_piR_009075
mmu-miR-101b-3p	228	mature	mir-101
mmu-miR-7072-3p	23	hairpin	undef
mmu-miR-185-5p	701	mature	mir-185
mmu_piR_020609	1	piRNA	mmu_piR_020609
mmu-miR-190a-5p	2	mature	mir-190
mmu-miR-15b-5p	252	mature	mir-15
mmu-miR-872-5p	485	hairpin	mir-872
mmu-miR-6937-5p	2	hairpin	undef
mmu-miR-615-3p	1	mature	mir-615
mmu-miR-1943-3p	50	hairpin	undef
mmu-miR-370-3p	1	mature	mir-370
mmu-miR-326-3p	4129	hairpin	mir-326
mmu-miR-505-5p	21	hairpin	mir-505
mmu-miR-130b-5p	203	hairpin	mir-130
mmu-miR-191-5p	25403	mature	mir-191
mmu-miR-125a-5p	3257	hairpin	mir-10
mmu_piR_022133	3	piRNA	mmu_piR_022133
mmu-miR-339-3p	58	hairpin	mir-339
mmu_piR_033368	3	piRNA	mmu_piR_033368
mmu-miR-142a-5p	343	mature	mir-142
mmu-miR-192-5p	2843	hairpin	mir-192
mmu-miR-34c-3p	45	hairpin	mir-34
mmu-miR-503-3p	775	hairpin	mir-503
mmu-miR-378a-3p	10287	hairpin	mir-378
mmu-miR-423-3p	921	mature	mir-423
mmu_piR_019047	3	piRNA	mmu_piR_019047
mmu_piR_016422	1	piRNA	mmu_piR_016422
mmu_piR_039082	3	piRNA	mmu_piR_039082
mmu-miR-92b-5p	1	hairpin	mir-25
mmu-miR-34b-5p	3	hairpin	mir-34
mmu-miR-29b-3p	14	mature	mir-29
mmu_piR_000512	204	piRNA	mmu_piR_000512
mmu-miR-20a-5p	12	hairpin	mir-17
RF00051	18	precursor	mir-17 microRNA precursor family
RF00047	1248	precursor	mir-2 microRNA precursor
RF02475	1	snoRNA	Small nucleolar RNA GlsR6
RF01280	9	snoRNA	Small nucleolar RNA snoR14
RF00311	3	snoRNA	Small nucleolar RNA Z188
RF01082	1	Rfam other sncRNA	Pseudoknot of upstream pseudoknot domain (UPD) of the 3'UTR
RF01335	1	Rfam other sncRNA	CRISPR RNA direct repeat element
RF00337	10	snoRNA	Small nucleolar RNA Z112
RF00608	66	snoRNA	Small nucleolar RNA SNORD99
RF00694	2	precursor	microRNA mir-137
RF00445	185	precursor	mir-399 microRNA precursor family
RF01118	76	rRNA	Pseudoknot of the domain G(G12) of 23S ribosomal RNA
RF01178	2	snoRNA	Small nucleolar RNA snoR77Y
RF00658	276	precursor	microRNA mir-21
RF00202	9	snoRNA	Small nucleolar RNA R66
RF00067	1	snoRNA	Small nucleolar RNA SNORD15
RF00327	3	snoRNA	Small nucleolar RNA Z194
RF01219	3	snoRNA	Small nucleolar RNA snoR100
RF01141	3	snoRNA	Small nucleolar RNA sR18
RF00448	7	Rfam other sncRNA	Epstein-Barr virus nuclear antigen (EBNA) IRES
RF01833	11	Rfam other sncRNA	ribosomal frameshift site
RF00003	730	snRNA	U1 spliceosomal RNA
RF00375	13	Rfam other sncRNA	HIV primer binding site (PBS)
RF01097	1	Rfam other sncRNA	Gag/pro ribosomal frameshift site
RF00588	8	snoRNA	Small nucleolar RNA SNORD41
RF00844	115	precursor	microRNA mir-67
RF00090	1	snoRNA	Small nucleolar RNA SNORA74
RF00441	5	snoRNA	Small nucleolar RNA Z242
RF00345	61	snoRNA	Small nucleolar RNA snoR1
RF02182	3	Rfam other sncRNA	ST7 antisense RNA 2 conserved region 2
RF00706	416	precursor	microRNA mir-263
RF01847	5	snoRNA	Plant small nucleolar RNA U3
RF01687	29	Rfam other sncRNA	Acido-Lenti-1 RNA
RF00912	231	precursor	microRNA mir-877
RF00674	116	precursor	microRNA mir-187
RF00704	3812	precursor	microRNA MIR397
RF00677	39021	precursor	microRNA MIR168
RF00657	54	precursor	microRNA mir-184
RF00249	9	precursor	mir-46/mir-47/mir-281 microRNA precursor family
RF00647	1461	precursor	microRNA MIR164
RF00350	4	snoRNA	Small nucleolar RNA Z152/R70/R12/
RF00007	1	snRNA	U12 minor spliceosomal RNA
RF00133	3	snoRNA	Small nucleolar RNA Z195/SNORD33/SNORD32 family
RF01852	275	tRNA	Selenocysteine transfer RNA
RF01707	6	Rfam other sncRNA	JUMPstart RNA
RF00502	2	Rfam other sncRNA	Turnip crinkle virus (TCV) core promoter hairpin (Pr)
RF02020	4	precursor	microRNA mir-25
RF00717	9	precursor	microRNA mir-315
RF01497	2	Rfam other sncRNA	ALIL pseudoknot
RF00217	81	snoRNA	Small nucleolar RNA SNORD20
RF01855	47	Rfam other sncRNA	Plant signal recognition particle RNA
RF00180	7	Rfam other sncRNA	Renin stability regulatory element (REN-SRE)
RF01432	2	snoRNA	small nucleolar RNA snoR143
RF02419	14	Rfam other sncRNA	Streptococcus sRNA Spd-sr37
RF01959	934	rRNA	Archaeal small subunit ribosomal RNA
RF00149	8	snoRNA	Small nucleolar RNA Z103
RF00055	1	snoRNA	Small nucleolar RNA SNORD96 family
RF01346	81	Rfam other sncRNA	CRISPR RNA direct repeat element
RF01130	7	snoRNA	Small nucleolar RNA sR46
RF00151	2	snoRNA	Small nucleolar RNA SNORD58
RF00075	20762	precursor	mir-166 microRNA precursor
RF02359	9	Rfam other sncRNA	Bacteriophage MS2 operator hairpin
RF01303	1	snoRNA	Small nucleolar RNA sR49
RF00700	11843	precursor	microRNA mir-375
RF00349	5	snoRNA	Small nucleolar RNA R11/Z151
RF00783	1317	precursor	microRNA mir-484
RF00323	2	snoRNA	Small nucleolar RNA R79
RF00757	1	precursor	microRNA mir-275
RF00695	7753	precursor	microRNA MIR398
RF01297	1	snoRNA	Small nucleolar RNA sR40
RF01369	1	Rfam other sncRNA	CRISPR RNA direct repeat element
RF00156	1	snoRNA	Small nucleolar RNA SNORA70
RF01356	9	Rfam other sncRNA	CRISPR RNA direct repeat element
RF00518	1	Rfam other sncRNA	speF leader
RF00287	1	snoRNA	Small nucleolar RNA SNORD44
RF00175	1	Rfam other sncRNA	Human immunodeficiency virus type 1 dimerisation initiation site
RF00662	462	precursor	microRNA mir-132
RF00679	4	precursor	microRNA mir-210
RF00076	3598	precursor	mir-181 microRNA precursor
RF01277	2	snoRNA	Small nucleolar RNA U54
RF01843	1	Rfam other sncRNA	neiserria ribosomal frameshift element
RF00276	2	snoRNA	Small nucleolar RNA SNORD52
RF01111	1	Rfam other sncRNA	Pseudoknot of upstream pseudoknot domain (UPD) of the 3'UTR
RF02162	73	Rfam other sncRNA	XIST RNA A repeat
RF00619	11	snRNA	U6atac minor spliceosomal RNA
RF00646	79	precursor	microRNA mir-204
RF00250	2	precursor	Trans-activation response element (TAR)
RF00001	93	rRNA	5S ribosomal RNA
RF01299	1	snoRNA	Small nucleolar RNA SNORD2
RF02000	6	precursor	microRNA MIR1846
RF01426	2	snoRNA	small nucleolar RNA snoR126
RF02194	7	Rfam other sncRNA	Bacterial antisense RNA HPnc0260
RF01169	1	snoRNA	Small nucleolar RNA SNORD112
RF02543	4135	rRNA	Eukaryotic large subunit ribosomal RNA
RF00592	1	snoRNA	Small nucleolar RNA SNORD78
RF00382	33	Rfam other sncRNA	DnaX ribosomal frameshifting element
RF00649	3069	precursor	microRNA mir-128
RF00696	13	precursor	microRNA mir-203
RF00100	3	Rfam other sncRNA	7SK RNA
RF00245	198	precursor	mir-19 microRNA precursor family
RF00201	2	snoRNA	Small nucleolar RNA Z278
RF00192	3	Rfam other sncRNA	Bovine leukaemia virus RNA packaging signal
RF00177	982	rRNA	Bacterial small subunit ribosomal RNA
RF02398	1	Rfam other sncRNA	Staphylococcus sRNA sau-6072
RF01851	89	Rfam other sncRNA	Cyanobacteria transfer-messenger RNA
RF00711	398	precursor	microRNA mir-449
RF00919	1	precursor	microRNA mir-874
RF00004	27	snRNA	U2 spliceosomal RNA
RF01193	5	snoRNA	Small nucleolar RNA snoR20a
RF01716	219	Rfam other sncRNA	PhotoRC-I RNA
RF00284	5	snoRNA	Small nucleolar RNA SNORD74
RF01755	1	Rfam other sncRNA	rmf RNA
RF00720	9	precursor	microRNA mir-317
RF01284	3	snoRNA	Small nucleolar RNA snoR8a
RF00653	12	precursor	microRNA mir-22
RF01973	1	Rfam other sncRNA	H19 conserved region 2
RF00332	1	snoRNA	Small nucleolar RNA Z266
RF02516	100	precursor	mir-393 microRNA precursor family
RF01849	12	Rfam other sncRNA	Alphaproteobacteria transfer-messenger RNA
RF01274	1	snoRNA	Small nucleolar RNA sR45
RF01120	1	snoRNA	Small nucleolar RNA sR33
RF02540	44	rRNA	Archaeal large subunit ribosomal RNA
RF02119	1	Rfam other sncRNA	FTX transcript, XIST regulator conserved region 1
RF02028	5	precursor	microRNA mir-1827
RF00452	20	precursor	mir-172 microRNA precursor family
RF01295	8	snoRNA	Small Cajal body-specific RNA 7
RF00053	1084	precursor	mir-7 microRNA precursor
RF01753	6	Rfam other sncRNA	psbNH RNA
RF01170	2	snoRNA	Small nucleolar RNA U61
RF00675	2	precursor	microRNA mir-145
RF01068	69	Rfam other sncRNA	mini-ykkC RNA motif
RF00144	1671	precursor	mir-199 microRNA precursor
RF00751	2	precursor	microRNA mir-12
RF01306	19	snoRNA	Small nucleolar RNA sR52
RF00289	14	snoRNA	Small nucleolar RNA SNORD104
RF00690	8682	precursor	microRNA MIR408
RF00459	41	Rfam other sncRNA	Mason-Pfizer monkey virus packaging signal
RF01139	3	snoRNA	Small nucleolar RNA sR2
RF00637	77	precursor	microRNA mir-276
RF00032	11	Rfam other sncRNA	Histone 3' UTR stem-loop
RF00029	1	Rfam other sncRNA	Group II catalytic intron
RF00010	1	Rfam other sncRNA	Bacterial RNase P class A
RF00303	4	snoRNA	Small nucleolar RNA snoR86
RF01074	2	Rfam other sncRNA	Putative RNA-dependent RNA polymerase ribosomal frameshift site
RF00052	760	precursor	lin-4 microRNA precursor
RF00257	168	precursor	mir-194 microRNA precursor family
RF02061	81	precursor	microRNA mir-301
RF00357	5	snoRNA	Small nucleolar RNA R44/J54/Z268 family
RF01867	4	Rfam other sncRNA	caulobacter sRNA CC2171
RF02553	4	Rfam other sncRNA	Y RNA-like
RF01748	2	Rfam other sncRNA	nuoG RNA
RF01793	1	Rfam other sncRNA	ffh sRNA
RF01292	2	snoRNA	Small nucleolar RNA snoR2/U65
RF00671	1	precursor	microRNA mir-138
RF01845	1	Rfam other sncRNA	Early nodulin 40
RF01428	1	snoRNA	small nucleolar RNA snoR128
RF00689	52	precursor	microRNA MIR390
RF01330	12	Rfam other sncRNA	CRISPR RNA direct repeat element
RF00715	1	precursor	microRNA mir-383
RF00644	24573	precursor	microRNA mir-27
RF00439	2	snoRNA	Small nucleolar RNA SNORD87
RF00104	607	precursor	mir-10 microRNA precursor family
RF00251	3	precursor	mir-219 microRNA precursor family
RF01960	139163	rRNA	Eukaryotic small subunit ribosomal RNA
RF00189	1	snoRNA	Small nucleolar RNA SNORD95
RF00166	1	Rfam other sncRNA	PrrB/RsmZ RNA family
RF01309	1	snoRNA	Small nucleolar RNA sR60
RF00223	1	Rfam other sncRNA	bip internal ribosome entry site (IRES)
RF00430	1	snoRNA	Small nucleolar RNA SNORA54
RF00017	100	Rfam other sncRNA	Metazoan signal recognition particle RNA
RF00256	7	precursor	mir-196 microRNA precursor family
RF01232	1	snoRNA	Small nucleolar RNA R442
RF01506	112	snoRNA	A. fumigatus snoRNA Afu_294
RF01942	8	precursor	microRNA mir-1937
RF00727	30	precursor	microRNA bantam
RF01382	26	Rfam other sncRNA	HIV-1 stem-loop 4 packaging signal
RF02087	1	Rfam other sncRNA	Yellow-achaete intergenic RNA conserved region 3
RF00703	5	precursor	microRNA mir-139
RF00241	572	precursor	mir-8/mir-141/mir-200 microRNA precursor family
RF01224	2	snoRNA	Small nucleolar RNA snoR80
RF01184	1	snoRNA	Small nucleolar RNA snR79
RF01304	20	snoRNA	Small nucleolar RNA sR5
RF01230	2	snoRNA	Small nucleolar RNA snoR77
RF00131	2285	precursor	mir-30 microRNA precursor
RF01133	1	snoRNA	Small nucleolar RNA sR3
RF00702	498	precursor	microRNA mir-182
RF00290	1	Rfam other sncRNA	Bamboo mosaic potexvirus (BaMV) cis-regulatory element
RF00456	1	precursor	mir-34 microRNA precursor family
RF01365	1	Rfam other sncRNA	CRISPR RNA direct repeat element
RF00325	12	snoRNA	Small nucleolar RNA SNORD53/SNORD92
RF00478	8	snoRNA	Small Cajal body specific RNA 6
RF00221	6	snoRNA	Small nucleolar RNA SNORD43
RF00498	3	Rfam other sncRNA	Equine arteritis virus leader TRS hairpin (LTH)
RF00205	12	snoRNA	Small nucleolar RNA R41
RF00638	10345	precursor	microRNA MIR159
RF00640	10600	precursor	microRNA MIR167_1
RF01322	4	Rfam other sncRNA	CRISPR RNA direct repeat element
RF00661	5	precursor	microRNA mir-31
RF00784	2759	precursor	microRNA mir-486
RF00073	288	precursor	mir-156 microRNA precursor
RF00254	1395	precursor	mir-16 microRNA precursor family
RF02226	43	Rfam other sncRNA	Xanthomonas sRNA sX7
RF01850	801	Rfam other sncRNA	Betaproteobacteria transfer-messenger RNA
RF00016	16	snoRNA	Small nucleolar RNA SNORD14
RF00237	6	precursor	mir-9/mir-79 microRNA precursor family
RF02129	2	Rfam other sncRNA	GNAS antisense RNA 1 conserved region 3
RF01792	1222	Rfam other sncRNA	ribosomal frameshift site
RF01152	1	snoRNA	Small nucleolar RNA sR1
RF01675	40	Rfam other sncRNA	Pseudomonas sRNA CrcZ
RF00244	791	precursor	mir-26 microRNA precursor family
RF01762	3	Rfam other sncRNA	Whalefall-1 RNA
RF02539	4	snoRNA	Plant small nucleolar RNA SNOR75
RF00746	1	precursor	microRNA mir-454
RF00005	23488	tRNA	tRNA
RF00691	311	precursor	microRNA mir-146
RF01095	1	Rfam other sncRNA	3'-terminal pseudoknot of CuYV/BPYV
RF01072	13	Rfam other sncRNA	Pseudoknot of upstream pseudoknot domain (UPD) of the 3'UTR
RF00273	1	snoRNA	Small nucleolar RNA SNORD59
RF00442	2	Rfam other sncRNA	ykkC-yxkD leader
RF00309	1	snoRNA	Small nucleolar RNA snR60/Z15/Z230/Z193/J17
RF00027	27411	precursor	let-7 microRNA precursor
RF00618	1	snRNA	U4atac minor spliceosomal RNA
RF00664	248	precursor	microRNA mir-223
RF00476	1	snoRNA	Small nucleolar RNA snR61/Z1/Z11
RF00129	158	precursor	mir-103/107 microRNA precursor
RF01420	3	snoRNA	Small nucleolar RNA snoR113
RF01519	1	Rfam other sncRNA	Caulobacter sRNA CC0196
RF01613	11	snoRNA	Nematode snoRNA ceN109
RF01338	5	Rfam other sncRNA	CRISPR RNA direct repeat element
RF00396	9	snoRNA	Small nucleolar RNA SNORA13
RF00247	1168	precursor	mir-160 microRNA precursor family
RF00838	156	precursor	microRNA mir-252
RF02106	4	Rfam other sncRNA	Deleted in lymphocytic leukemia 2 conserved region 2
RF00343	1	snoRNA	Small nucleolar RNA Z122
RF00648	535	precursor	microRNA MIR396
RF00630	1	Rfam other sncRNA	Pseudomonas sRNA P26
RF00714	1	precursor	microRNA MIR535
RF01099	1	Rfam other sncRNA	Pseudoknot of influenza A virus gene
RF02098	1	Rfam other sncRNA	DiGeorge syndrome critical region gene 5 conserved region
RF00135	2	snoRNA	Small nucleolar RNA Z223
RF00132	2	snoRNA	Small nucleolar RNA R24
RF01344	4	Rfam other sncRNA	CRISPR RNA direct repeat element
RF01684	1477	Rfam other sncRNA	MALAT1-associated small cytoplasmic RNA/MEN beta RNA
RF00645	710	precursor	microRNA MIR169_2
RF00361	4	snoRNA	Small nucleolar RNA Z119
RF00601	1	snoRNA	Small Cajal body specific RNA 20
RF01972	3	Rfam other sncRNA	H19 conserved region 1
RF00329	1	snoRNA	Small nucleolar RNA Z162
RF00385	2	Rfam other sncRNA	Infectious bronchitis virus D-RNA
RF00683	209	precursor	microRNA mir-143
RF02480	1	snoRNA	Small nucleolar RNA GlsR14
RF02541	2113	rRNA	Bacterial large subunit ribosomal RNA
RF01290	42	snoRNA	Small nucleolar RNA SNORD10
RF01125	1	snoRNA	Small nucleolar RNA sR4
RF00482	4	snoRNA	Small nucleolar RNA F1/F2/snoR5a
RF00046	20	snoRNA	Small nucleolar RNA R30/Z108
RF02207	1	Rfam other sncRNA	WT1 antisense RNA conserved region 5
RF00093	1	snoRNA	Small nucleolar RNA SNORD18
RF00103	99	precursor	mir-1 microRNA precursor family
RF00722	14101	precursor	microRNA mir-451
RF00069	11	snoRNA	Small nucleolar RNA SNORD24
RF00669	29	precursor	microRNA mir-96
RF00255	1	precursor	mir-218 microRNA precursor family
RF00688	99	precursor	microRNA MIR394
RF01156	1	snoRNA	Small nucleolar RNA SNORD123
RF01417	1	Rfam other sncRNA	Retroviral 3'UTR stability element
RF01560	1	snoRNA	Dictyostelium snoRNA DdR10
RF01126	1	snoRNA	Small nucleolar RNA sR41
RF00676	1	precursor	microRNA mir-127
RF01296	1	snoRNA	Small nucleolar RNA U85
RF01381	140	Rfam other sncRNA	HIV-1 stem-loop 3 Psi packaging signal
RF01424	4	snoRNA	small nucleolar RNA snoR118
RF01988	1	Rfam other sncRNA	Selenocysteine insertion sequence 2
RF00344	1	snoRNA	Small nucleolar RNA Z267
RF00610	1	snoRNA	Small nucleolar RNA SNORD110
RF01083	1	Rfam other sncRNA	Pseudoknot of upstream pseudoknot domain (UPD) of the 3'UTR
RF00488	1	snRNA	Yeast U1 spliceosomal RNA
RF02448	8	Rfam other sncRNA	Streptococcus sRNA SpR20
RF01179	6	snoRNA	Small nucleolar RNA U83
RF01895	36	precursor	microRNA mir-193
RF01834	17	Rfam other sncRNA	ribosomal frameshift site
RF00330	5	snoRNA	Small nucleolar RNA Z43
RF00054	1	snoRNA	Small nucleolar RNA SNORD25
RF01804	2	Rfam other sncRNA	Lambda phage CIII thermoregulator element
RF01138	1	snoRNA	Small nucleolar RNA sR23
RF01155	1	snoRNA	Small nucleolar RNA snoR101
RF00296	2	snoRNA	Small nucleolar RNA R16
RF01360	1	Rfam other sncRNA	CRISPR RNA direct repeat element
RF01727	1	Rfam other sncRNA	SAM/SAH riboswitch
RF00253	19	precursor	mir-101 microRNA precursor family
RF00884	3	precursor	microRNA MIR815
RF00803	11	precursor	microRNA mir-425
RF00300	13	snoRNA	Small nucleolar RNA Z221/R21b
RF00741	1479	precursor	microRNA mir-378
RF00070	2	snoRNA	Small nucleolar RNA SNORD29
RF01142	1	snoRNA	Small nucleolar RNA sR19
RF01272	1	snoRNA	Small nucleolar RNA snR86
RF02292	1	snoRNA	Tetrahymena snoRNA TtnuCD16
RF00012	206	snoRNA	Small nucleolar RNA U3
RF00446	928	precursor	mir-133 microRNA precursor family
RF00015	2	snRNA	U4 spliceosomal RNA
RF00339	17	snoRNA	Small nucleolar RNA snoR60
RF00613	1	snoRNA	Small nucleolar RNA SNORD94
RF01113	2	Rfam other sncRNA	Pseudoknot of upstream pseudoknot domain (UPD) of the 3'UTR
RF00651	1187	precursor	microRNA mir-221
RF00164	2	Rfam other sncRNA	Coronavirus 3' stem-loop II-like motif (s2m)
RF01014	228	precursor	microRNA mir-1306
RF00002	45363	rRNA	5.8S ribosomal RNA
RF00548	2	snRNA	U11 spliceosomal RNA
RF00599	1	snoRNA	Small nucleolar RNA SNORA77
RF01573	1	snoRNA	Dictyostelium snoRNA DdR5
RF00643	1667	precursor	microRNA MIR171_1
RF01489	1	Rfam other sncRNA	Listeria sRNA sbrA
RF00310	1	snoRNA	Small nucleolar RNA Z165
RF01903	1	precursor	microRNA mir-500
RF00019	8139	Rfam other sncRNA	Y RNA
RF00066	2	snRNA	U7 small nuclear RNA
RF00358	23	snoRNA	Small nucleolar RNA Z101
RF00080	1	Rfam other sncRNA	yybP-ykoY leader
RF01860	1	snoRNA	A. fumigatus snoRNA Afu_455
RF01317	1	Rfam other sncRNA	CRISPR RNA direct repeat element
RF00006	191	Rfam other sncRNA	Vault RNA
RF01163	2	snoRNA	Small nucleolar RNA snoR64a
RF00451	4	precursor	mir-395 microRNA precursor family
RF00204	3	snoRNA	Small nucleolar RNA R12
RF00160	3	snoRNA	Small nucleolar RNA Z159/U59
RF01104	9	Rfam other sncRNA	Pseudoknot of upstream pseudoknot domain (UPD) of the 3'UTR
RF00084	1	Rfam other sncRNA	CsrC RNA family
RF00178	14752	precursor	mir-24 microRNA precursor family
RF00359	1	snoRNA	Small nucleolar RNA Z102/R77
RF01835	1	Rfam other sncRNA	ribosomal frameshift site
RF01294	243	snoRNA	Small nucleolar RNA U89
RF00274	388	snoRNA	Small nucleolar RNA SNORD57
RF01100	1	Rfam other sncRNA	3'-terminal pseudoknot in BYV
RF00074	1423	precursor	mir-29 microRNA precursor
RF00736	227	precursor	microRNA mir-320
RF00130	5104	precursor	mir-192/215 microRNA precursor
RF00832	454	precursor	microRNA mir-71
RF01073	7	Rfam other sncRNA	Gag/pol translational readthrough site
RF00026	639	snRNA	U6 spliceosomal RNA
RF00667	283	precursor	microRNA mir-33
RF02542	6	rRNA	Microsporidia small subunit ribosomal RNA
RF00023	1407315	Rfam other sncRNA	transfer-messenger RNA
RF00020	2	snRNA	U5 spliceosomal RNA
RF01702	1	Rfam other sncRNA	Cyano-2 RNA
RF01116	53	Rfam other sncRNA	Cyanobacterial functional RNA 1
RF02549	1	Rfam other sncRNA	Pseudoknot PSK3
RF01307	6	snoRNA	Small nucleolar RNA sR55
RF00684	23	precursor	mir-122 microRNA precursor
RF01419	3	Rfam other sncRNA	Antisense RNA which regulates isiA expression
RF00606	275	snoRNA	Small nucleolar RNA SNORD93
RF00642	41449	precursor	microRNA mir-23
RF02003	1	Rfam other sncRNA	Group II catalytic intron D1-D4-4
RF00663	5	precursor	microRNA mir-183
RF02108	2	Rfam other sncRNA	Deleted in lymphocytic leukemia 2 conserved region 4
RF00469	3	Rfam other sncRNA	Hepatitis C stem-loop IV
RF01285	1	snoRNA	Small nucleolar RNA U31b
RF00360	7	snoRNA	Small nucleolar RNA Z107/R87
RF01939	1	precursor	microRNA mir-761
RF02096	5	precursor	mir-2973 microRNA precursor
RF01231	4	snoRNA	Small nucleolar RNA snoR74
RF00118	2	Rfam other sncRNA	rydB RNA
RF01107	1	Rfam other sncRNA	Pseudoknot of upstream pseudoknot domain (UPD) of the 3'UTR
RF00440	4	snoRNA	Small nucleolar RNA SNORD37
RF01350	2	Rfam other sncRNA	CRISPR RNA direct repeat element
RF01276	1	snoRNA	Small nucleolar RNA sR53
RF00239	17	precursor	mir-124 microRNA precursor family
RF01790	3	Rfam other sncRNA	ribosomal frameshift site
RF01643	5	Rfam other sncRNA	Caenorhabditis sRNA ceN56
RF00742	955	precursor	microRNA MIR162_2
RF00523	2	Rfam other sncRNA	Prion pseudoknot
RF00701	2398	precursor	microRNA mir-126
RF00464	4836	precursor	mir-92 microRNA precursor family
RF00731	5	precursor	microRNA mir-155
intron	3612118	intron	-
exon	2868532	exon	-
repeat	4650601	repeat	-
intergenic	1078064	intergenic	-
unmap	2621650	unmap	-

## Sheet: Table S1-noni fruit juice group
sRNA id	Count	Type	Description
mmu-miR-141-3p	5	hairpin	mir-8
mmu_piR_015997	2	piRNA	mmu_piR_015997
mmu-miR-700-3p	71	hairpin	undef
mmu_piR_007729	26	piRNA	mmu_piR_007729
mmu-miR-1843a-5p	1	mature	mir-1843
mmu_piR_009642	1	piRNA	mmu_piR_009642
mmu_piR_035293	1	piRNA	mmu_piR_035293
mmu-miR-467c-5p	1	hairpin	mir-467
mmu-miR-378a-3p	5072	mature	mir-378
mmu_piR_021915	51	piRNA	mmu_piR_021915
mmu_piR_032526	5	piRNA	mmu_piR_032526
mmu_piR_031575	1	piRNA	mmu_piR_031575
mmu_piR_003834	1	piRNA	mmu_piR_003834
mmu_piR_026795	1	piRNA	mmu_piR_026795
mmu_piR_022158	1	piRNA	mmu_piR_022158
mmu_piR_012278	1	piRNA	mmu_piR_012278
mmu_piR_000159	123	piRNA	mmu_piR_000159
mmu_piR_014059	1	piRNA	mmu_piR_014059
mmu-miR-6948-3p	1	hairpin	undef
mmu_piR_001016	1	piRNA	mmu_piR_001016
mmu-miR-130a-3p	384	mature	mir-130
mmu_piR_003913	1	piRNA	mmu_piR_003913
mmu_piR_028587	1	piRNA	mmu_piR_028587
mmu-miR-17-5p	45	mature	mir-17
mmu-miR-5620-5p	76	mature	undef
mmu-miR-28a-3p	37	mature	mir-28
mmu-miR-485-5p	49	mature	mir-485
mmu_piR_038365	1	piRNA	mmu_piR_038365
mmu_piR_022425	1	piRNA	mmu_piR_022425
mmu_piR_028182	1	piRNA	mmu_piR_028182
mmu-miR-450b-5p	1	hairpin	mir-450
mmu-miR-215-5p	87	mature	mir-192
mmu_piR_038759	1	piRNA	mmu_piR_038759
mmu_piR_000346	1	piRNA	mmu_piR_000346
mmu-miR-375-3p	9137	mature	mir-375
mmu-miR-3572-3p	1	hairpin	mir-3572
mmu_piR_038579	1	piRNA	mmu_piR_038579
mmu_piR_016887	1	piRNA	mmu_piR_016887
mmu_piR_020663	1	piRNA	mmu_piR_020663
mmu_piR_032883	50	piRNA	mmu_piR_032883
mmu_piR_034485	121	piRNA	mmu_piR_034485
mmu-miR-379-5p	1	mature	mir-379
mmu-miR-6967-3p	65	mature	mir-6967
mmu-miR-9b-3p	164	mature	undef
mmu-miR-6236	3	hairpin	undef
mmu-miR-199a-3p,mmu-miR-199b-3p	2	mature	mir-199
mmu_piR_004222	34	piRNA	mmu_piR_004222
mmu_piR_011454	1	piRNA	mmu_piR_011454
mmu_piR_037358	1	piRNA	mmu_piR_037358
mmu-let-7f-5p	9221	mature	let-7
mmu_piR_010963	3	piRNA	mmu_piR_010963
mmu_piR_000768	8	piRNA	mmu_piR_000768
mmu_piR_003163	1	piRNA	mmu_piR_003163
mmu-miR-30e-3p	225	hairpin	mir-30
mmu_piR_009121	28	piRNA	mmu_piR_009121
mmu-miR-34a-5p	138	hairpin	mir-34
mmu_piR_025576	1201	piRNA	mmu_piR_025576
mmu-miR-6944-3p	47	hairpin	undef
mmu_piR_020162	1	piRNA	mmu_piR_020162
mmu_piR_002617	1	piRNA	mmu_piR_002617
mmu_piR_013616	4	piRNA	mmu_piR_013616
mmu_piR_039114	94	piRNA	mmu_piR_039114
mmu_piR_037165	2	piRNA	mmu_piR_037165
mmu-miR-1191a	1	hairpin	undef
mmu_piR_027905	1	piRNA	mmu_piR_027905
mmu_piR_026700	1	piRNA	mmu_piR_026700
mmu-miR-350-3p	2	mature	mir-350
mmu-miR-27a-3p	141954	hairpin	mir-27
mmu_piR_012829	519	piRNA	mmu_piR_012829
mmu_piR_038428	175	piRNA	mmu_piR_038428
mmu_piR_025414	1	piRNA	mmu_piR_025414
mmu-miR-3074-2-3p	1	hairpin	mir-3074
mmu_piR_002643	6	piRNA	mmu_piR_002643
mmu_piR_023150	1	piRNA	mmu_piR_023150
mmu_piR_020793	1	piRNA	mmu_piR_020793
mmu_piR_000709	1	piRNA	mmu_piR_000709
mmu_piR_033882	1	piRNA	mmu_piR_033882
mmu-miR-210-3p	85	hairpin	mir-210
mmu_piR_039349	1	piRNA	mmu_piR_039349
mmu-miR-542-5p	222	mature	mir-542
mmu-miR-429-3p	169	mature	mir-8
mmu_piR_000590	1	piRNA	mmu_piR_000590
mmu-miR-10b-5p	253	mature	mir-10
mmu-miR-139-5p	1593	hairpin	mir-139
mmu_piR_021777	2	piRNA	mmu_piR_021777
mmu_piR_035679	1	piRNA	mmu_piR_035679
mmu_piR_002900	1	piRNA	mmu_piR_002900
mmu_piR_024543	1	piRNA	mmu_piR_024543
mmu_piR_015546	426	piRNA	mmu_piR_015546
mmu_piR_032545	1	piRNA	mmu_piR_032545
mmu_piR_033352	1	piRNA	mmu_piR_033352
mmu-miR-484	1912	mature	mir-484
mmu-miR-224-5p	132	mature	mir-224
mmu-miR-9-3p	1	mature	mir-9
mmu_piR_015926	1	piRNA	mmu_piR_015926
mmu_piR_037640	7	piRNA	mmu_piR_037640
mmu-miR-184-3p	4	mature	mir-184
mmu_piR_013035	1	piRNA	mmu_piR_013035
mmu_piR_025554	1	piRNA	mmu_piR_025554
mmu_piR_023562	1	piRNA	mmu_piR_023562
mmu-miR-470-5p	15	mature	mir-743
mmu_piR_035294	5	piRNA	mmu_piR_035294
mmu-miR-25-3p	6401	hairpin	mir-25
mmu_piR_038674	1	piRNA	mmu_piR_038674
mmu-miR-20a-5p	32	mature	mir-17
mmu_piR_010658	24	piRNA	mmu_piR_010658
mmu_piR_036133	82	piRNA	mmu_piR_036133
mmu-miR-466i-5p	769	hairpin	mir-467
mmu-miR-8116	1	mature	undef
mmu_piR_017760	2	piRNA	mmu_piR_017760
mmu-miR-5114	9	hairpin	undef
mmu_piR_016784	1	piRNA	mmu_piR_016784
mmu-miR-33-5p	1	hairpin	mir-33
mmu-miR-8112	14	hairpin	undef
mmu-miR-7a-5p	2984	hairpin	mir-7
mmu_piR_012610	1	piRNA	mmu_piR_012610
mmu_piR_036624	1	piRNA	mmu_piR_036624
mmu_piR_014082	1	piRNA	mmu_piR_014082
mmu-miR-1839-5p	201	mature	mir-1839
mmu-miR-672-3p	1	mature	mir-672
mmu_piR_022053	41	piRNA	mmu_piR_022053
mmu_piR_014612	1	piRNA	mmu_piR_014612
mmu_piR_017701	1	piRNA	mmu_piR_017701
mmu_piR_033616	1	piRNA	mmu_piR_033616
mmu_piR_016727	1	piRNA	mmu_piR_016727
mmu_piR_032535	1	piRNA	mmu_piR_032535
mmu_piR_020516	1	piRNA	mmu_piR_020516
mmu_piR_014983	1	piRNA	mmu_piR_014983
mmu_piR_025759	2	piRNA	mmu_piR_025759
mmu_piR_009950	1	piRNA	mmu_piR_009950
mmu_piR_038303	1	piRNA	mmu_piR_038303
mmu_piR_018895	19	piRNA	mmu_piR_018895
mmu-miR-10a-5p	1246	hairpin	mir-10
mmu-miR-434-3p	143	hairpin	mir-434
mmu_piR_028051	1	piRNA	mmu_piR_028051
mmu_piR_019588	2	piRNA	mmu_piR_019588
mmu_piR_024269	1	piRNA	mmu_piR_024269
mmu_piR_039312	1	piRNA	mmu_piR_039312
mmu_piR_015127	56	piRNA	mmu_piR_015127
mmu_piR_000644	1	piRNA	mmu_piR_000644
mmu_piR_010356	1	piRNA	mmu_piR_010356
mmu_piR_013828	1	piRNA	mmu_piR_013828
mmu_piR_002368	1	piRNA	mmu_piR_002368
mmu_piR_021602	1	piRNA	mmu_piR_021602
mmu_piR_024998	1	piRNA	mmu_piR_024998
mmu_piR_011904	1	piRNA	mmu_piR_011904
mmu-miR-19b-3p	1106	hairpin	mir-19
mmu_piR_014236	1	piRNA	mmu_piR_014236
mmu_piR_006188	26	piRNA	mmu_piR_006188
mmu_piR_031123	1	piRNA	mmu_piR_031123
mmu_piR_015292	1	piRNA	mmu_piR_015292
mmu-miR-449a-5p	266	mature	mir-449
mmu-miR-92a-3p	92927	hairpin	mir-25
mmu_piR_035344	2	piRNA	mmu_piR_035344
mmu_piR_000935	24749	piRNA	mmu_piR_000935
mmu_piR_001501	1	piRNA	mmu_piR_001501
mmu-miR-378b	354	mature	mir-378
mmu_piR_025532	1	piRNA	mmu_piR_025532
mmu-miR-139-3p	1	mature	mir-139
mmu-miR-7075-3p	3	hairpin	undef
mmu_piR_015045	1	piRNA	mmu_piR_015045
mmu_piR_027884	1	piRNA	mmu_piR_027884
mmu_piR_024245	1	piRNA	mmu_piR_024245
mmu_piR_033258	1	piRNA	mmu_piR_033258
mmu-miR-219a-2-3p	1	hairpin	mir-219
mmu_piR_026429	1	piRNA	mmu_piR_026429
mmu_piR_021664	59	piRNA	mmu_piR_021664
mmu-let-7f-2-3p	1768	hairpin	let-7
mmu-miR-181a-5p	3692	hairpin	mir-181
mmu_piR_008042	1	piRNA	mmu_piR_008042
mmu-miR-215-3p	1	mature	mir-192
mmu-miR-34a-5p	145	mature	mir-34
mmu_piR_023635	20	piRNA	mmu_piR_023635
mmu-miR-1a-3p	6	mature	mir-1
mmu-miR-669b-5p	86	hairpin	mir-467
mmu-miR-211-5p	4	mature	mir-204
mmu_piR_009285	30	piRNA	mmu_piR_009285
mmu_piR_017508	4	piRNA	mmu_piR_017508
mmu_piR_010666	1	piRNA	mmu_piR_010666
mmu_piR_038967	1	piRNA	mmu_piR_038967
mmu-miR-411-5p	7	hairpin	mir-379
mmu-miR-93-5p	1313	mature	mir-17
mmu_piR_039551	1	piRNA	mmu_piR_039551
mmu_piR_015015	1	piRNA	mmu_piR_015015
mmu_piR_026021	1	piRNA	mmu_piR_026021
mmu-miR-133a-3p	80	hairpin	mir-133
mmu_piR_019651	1	piRNA	mmu_piR_019651
mmu_piR_038400	49	piRNA	mmu_piR_038400
mmu-miR-486b-3p	108	hairpin	mir-486
mmu-miR-339-3p	1	mature	mir-339
mmu-miR-151-3p	360	mature	mir-28
mmu-miR-574-5p	4	hairpin	mir-574
mmu_piR_010465	1	piRNA	mmu_piR_010465
mmu_piR_033076	1	piRNA	mmu_piR_033076
mmu_piR_011244	1	piRNA	mmu_piR_011244
mmu_piR_024101	1	piRNA	mmu_piR_024101
mmu_piR_004473	19	piRNA	mmu_piR_004473
mmu_piR_009742	1	piRNA	mmu_piR_009742
mmu-miR-7069-3p	51	hairpin	undef
mmu_piR_013011	2	piRNA	mmu_piR_013011
mmu_piR_004658	1	piRNA	mmu_piR_004658
mmu_piR_037234	1	piRNA	mmu_piR_037234
mmu-miR-380-3p	72	hairpin	mir-379
mmu_piR_014466	1	piRNA	mmu_piR_014466
mmu-miR-664-3p	160	hairpin	mir-664
mmu-miR-212-5p	1	hairpin	mir-132
mmu_piR_036615	54	piRNA	mmu_piR_036615
mmu_piR_010314	1	piRNA	mmu_piR_010314
mmu-miR-183-5p	1	mature	mir-183
mmu_piR_034434	1	piRNA	mmu_piR_034434
mmu_piR_014695	1	piRNA	mmu_piR_014695
mmu-miR-29a-3p	9790	hairpin	mir-29
mmu_piR_002605	1	piRNA	mmu_piR_002605
mmu-miR-1247-5p	48	mature	mir-1247
mmu-miR-423-3p	2648	hairpin	mir-423
mmu_piR_033569	1	piRNA	mmu_piR_033569
mmu_piR_017320	37	piRNA	mmu_piR_017320
mmu_piR_013747	1	piRNA	mmu_piR_013747
mmu_piR_014919	3	piRNA	mmu_piR_014919
mmu_piR_033646	938	piRNA	mmu_piR_033646
mmu-miR-5129-5p	1	hairpin	undef
mmu_piR_007432	4	piRNA	mmu_piR_007432
mmu-miR-16-5p	3697	hairpin	mir-15
mmu_piR_011468	1	piRNA	mmu_piR_011468
mmu-miR-7b-5p	496	hairpin	mir-7
mmu_piR_001996	1	piRNA	mmu_piR_001996
mmu-miR-301a-3p	55	mature	mir-130
mmu_piR_033633	1	piRNA	mmu_piR_033633
mmu-miR-486a-3p	395	mature	mir-486
mmu-miR-5114	144	mature	undef
mmu_piR_004110	1	piRNA	mmu_piR_004110
mmu_piR_013217	1	piRNA	mmu_piR_013217
mmu_piR_009999	1	piRNA	mmu_piR_009999
mmu_piR_030281	40	piRNA	mmu_piR_030281
mmu-miR-369-3p	89	mature	mir-154
mmu_piR_014873	1	piRNA	mmu_piR_014873
mmu-miR-335-5p	48	mature	mir-335
mmu_piR_037191	1	piRNA	mmu_piR_037191
mmu-let-7i-5p	18480	hairpin	let-7
mmu_piR_019764	1	piRNA	mmu_piR_019764
mmu_piR_029372	2	piRNA	mmu_piR_029372
mmu-miR-142a-3p	66	hairpin	mir-142
mmu-miR-3960	189	hairpin	mir-3960
mmu-miR-425-5p	73	mature	mir-425
mmu_piR_011134	45	piRNA	mmu_piR_011134
mmu-miR-127-3p	258	mature	mir-127
mmu-miR-486a-5p,mmu-miR-486b-5p	8887	hairpin	mir-486
mmu_piR_010008	3	piRNA	mmu_piR_010008
mmu_piR_031931	1	piRNA	mmu_piR_031931
mmu-miR-6941-3p	1	hairpin	undef
mmu_piR_020682	1	piRNA	mmu_piR_020682
mmu_piR_004940	1	piRNA	mmu_piR_004940
mmu-miR-676-3p	225	hairpin	mir-676
mmu_piR_000781	1	piRNA	mmu_piR_000781
mmu-miR-224-5p	1	hairpin	mir-224
mmu_piR_008367	1	piRNA	mmu_piR_008367
mmu_piR_015255	2	piRNA	mmu_piR_015255
mmu_piR_001821	1	piRNA	mmu_piR_001821
mmu_piR_011225	220	piRNA	mmu_piR_011225
mmu_piR_020334	1	piRNA	mmu_piR_020334
mmu-miR-369-5p	5	hairpin	mir-154
mmu_piR_039960	1	piRNA	mmu_piR_039960
mmu_piR_009333	1	piRNA	mmu_piR_009333
mmu_piR_020767	1	piRNA	mmu_piR_020767
mmu-miR-484	1733	hairpin	mir-484
mmu-let-7d-3p	2250	mature	let-7
mmu-miR-7232-3p	1	mature	undef
mmu-miR-30b-5p	189	mature	mir-30
mmu-miR-28a-5p	237	mature	mir-28
mmu_piR_003509	32	piRNA	mmu_piR_003509
mmu-miR-141-3p	81	mature	mir-8
mmu_piR_035033	1	piRNA	mmu_piR_035033
mmu_piR_020120	211	piRNA	mmu_piR_020120
mmu-miR-139-3p	63	hairpin	mir-139
mmu_piR_021292	2	piRNA	mmu_piR_021292
mmu_piR_036069	1	piRNA	mmu_piR_036069
mmu_piR_002606	1	piRNA	mmu_piR_002606
mmu_piR_008483	1	piRNA	mmu_piR_008483
mmu_piR_010989	1	piRNA	mmu_piR_010989
mmu_piR_010679	1	piRNA	mmu_piR_010679
mmu_piR_033212	4	piRNA	mmu_piR_033212
mmu_piR_014930	1	piRNA	mmu_piR_014930
mmu-miR-3071-5p	1	hairpin	undef
mmu_piR_037320	157	piRNA	mmu_piR_037320
mmu_piR_037613	1	piRNA	mmu_piR_037613
mmu_piR_016683	1	piRNA	mmu_piR_016683
mmu-miR-21a-5p	8516	mature	mir-21
mmu-let-7d-5p	3200	mature	let-7
mmu_piR_026379	1	piRNA	mmu_piR_026379
mmu-miR-23b-3p	4	mature	mir-23
mmu_piR_006982	6	piRNA	mmu_piR_006982
mmu_piR_034454	6	piRNA	mmu_piR_034454
mmu-miR-98-5p	273	mature	let-7
mmu-miR-411-5p	69	mature	mir-379
mmu-miR-182-5p	3	hairpin	mir-182
mmu_piR_012576	1	piRNA	mmu_piR_012576
mmu_piR_007492	1	piRNA	mmu_piR_007492
mmu-miR-7024-5p	1	hairpin	undef
mmu_piR_008753	1	piRNA	mmu_piR_008753
mmu_piR_035303	1	piRNA	mmu_piR_035303
mmu_piR_005846	1	piRNA	mmu_piR_005846
mmu-miR-7117-3p	56	hairpin	undef
mmu-miR-96-5p	2	hairpin	mir-96
mmu_piR_017405	169	piRNA	mmu_piR_017405
mmu_piR_004826	1	piRNA	mmu_piR_004826
mmu_piR_031465	25	piRNA	mmu_piR_031465
mmu_piR_029210	1	piRNA	mmu_piR_029210
mmu-miR-124-3p	141	mature	mir-124
mmu-miR-322-5p	1264	hairpin	mir-322
mmu-miR-342-3p	1530	hairpin	mir-342
mmu_piR_011349	1	piRNA	mmu_piR_011349
mmu-miR-219a-5p	2	hairpin	mir-219
mmu-miR-181d-3p	407	hairpin	mir-181
mmu_piR_038869	2	piRNA	mmu_piR_038869
mmu_piR_004990	2	piRNA	mmu_piR_004990
mmu-miR-669n	45	hairpin	undef
mmu-miR-361-5p	197	hairpin	mir-361
mmu_piR_009084	1	piRNA	mmu_piR_009084
mmu-miR-466i-5p	281	mature	mir-467
mmu_piR_027178	93	piRNA	mmu_piR_027178
mmu-miR-92b-3p	978	mature	mir-25
mmu_piR_016636	1	piRNA	mmu_piR_016636
mmu-miR-6395	2	hairpin	undef
mmu_piR_034829	27	piRNA	mmu_piR_034829
mmu_piR_012562	18	piRNA	mmu_piR_012562
mmu_piR_002333	1	piRNA	mmu_piR_002333
mmu_piR_002376	1	piRNA	mmu_piR_002376
mmu_piR_016952	3	piRNA	mmu_piR_016952
mmu-let-7i-5p	21859	mature	let-7
mmu_piR_013386	1	piRNA	mmu_piR_013386
mmu-miR-142a-5p	66	hairpin	mir-142
mmu_piR_037969	1	piRNA	mmu_piR_037969
mmu-miR-27a-3p	18271	mature	mir-27
mmu-miR-3470a	98	hairpin	mir-3470
mmu_piR_002931	1	piRNA	mmu_piR_002931
mmu_piR_014160	1	piRNA	mmu_piR_014160
mmu_piR_003040	1	piRNA	mmu_piR_003040
mmu_piR_027208	37	piRNA	mmu_piR_027208
mmu-miR-652-5p	59	hairpin	mir-652
mmu_piR_010303	2	piRNA	mmu_piR_010303
mmu-miR-181c-5p	80	mature	mir-181
mmu_piR_004114	1	piRNA	mmu_piR_004114
mmu_piR_035020	1	piRNA	mmu_piR_035020
mmu_piR_016752	1	piRNA	mmu_piR_016752
mmu_piR_010309	1	piRNA	mmu_piR_010309
mmu-miR-22-3p	19689	mature	mir-22
mmu-miR-497a-5p	2	hairpin	mir-497
mmu-miR-6970-5p	39	hairpin	undef
mmu_piR_034347	1	piRNA	mmu_piR_034347
mmu_piR_038940	38	piRNA	mmu_piR_038940
mmu-miR-320-3p	2502	hairpin	mir-320
mmu-miR-29c-3p	972	hairpin	mir-29
mmu-miR-184-3p	220	hairpin	mir-184
mmu-miR-212-3p	92	mature	mir-132
mmu-miR-451a	33134	mature	mir-451
mmu-miR-199a-3p,mmu-miR-199b-3p	2751	hairpin	mir-199
mmu_piR_029283	1	piRNA	mmu_piR_029283
mmu-miR-1839-5p	752	hairpin	mir-1839
mmu_piR_000618	42	piRNA	mmu_piR_000618
mmu_piR_039488	1	piRNA	mmu_piR_039488
mmu-miR-6914-3p	11	hairpin	undef
mmu-miR-3473d	66	hairpin	mir-3473
mmu-miR-671-3p	106	hairpin	mir-671
mmu_piR_027095	1	piRNA	mmu_piR_027095
mmu_piR_026360	2	piRNA	mmu_piR_026360
mmu_piR_017858	1	piRNA	mmu_piR_017858
mmu_piR_002907	1	piRNA	mmu_piR_002907
mmu_piR_005673	1	piRNA	mmu_piR_005673
mmu_piR_000308	1	piRNA	mmu_piR_000308
mmu-miR-206-3p	473	mature	mir-1
mmu_piR_027324	1	piRNA	mmu_piR_027324
mmu_piR_032380	1	piRNA	mmu_piR_032380
mmu_piR_024398	1	piRNA	mmu_piR_024398
mmu_piR_019627	1	piRNA	mmu_piR_019627
mmu_piR_014305	1	piRNA	mmu_piR_014305
mmu_piR_024908	1	piRNA	mmu_piR_024908
mmu-miR-221-3p	815	hairpin	mir-221
mmu_piR_029138	1	piRNA	mmu_piR_029138
mmu_piR_030493	1	piRNA	mmu_piR_030493
mmu_piR_029357	13	piRNA	mmu_piR_029357
mmu-miR-181d-5p	166	hairpin	mir-181
mmu-miR-128-3p	4135	hairpin	mir-128
mmu_piR_027779	34	piRNA	mmu_piR_027779
mmu-miR-543-3p	1	hairpin	mir-329
mmu-let-7d-3p	12591	hairpin	let-7
mmu_piR_018630	1	piRNA	mmu_piR_018630
mmu-miR-5099	1	hairpin	undef
mmu-miR-182-5p	111	mature	mir-182
mmu-miR-152-3p	2	hairpin	mir-148
mmu_piR_031471	57	piRNA	mmu_piR_031471
mmu-miR-543-5p	1	hairpin	mir-329
mmu_piR_034706	1	piRNA	mmu_piR_034706
mmu-miR-871-5p	5	mature	mir-743
mmu-miR-449a-5p	4	hairpin	mir-449
mmu_piR_027739	2	piRNA	mmu_piR_027739
mmu_piR_038761	133	piRNA	mmu_piR_038761
mmu-miR-7019-5p	47	hairpin	undef
mmu-miR-338-5p	1	mature	mir-338
mmu_piR_025870	1	piRNA	mmu_piR_025870
mmu_piR_010489	1	piRNA	mmu_piR_010489
mmu-miR-154-5p	120	hairpin	mir-154
mmu_piR_010494	1	piRNA	mmu_piR_010494
mmu_piR_006468	1	piRNA	mmu_piR_006468
mmu-miR-328-5p	4	hairpin	mir-328
mmu_piR_011485	1	piRNA	mmu_piR_011485
mmu_piR_005813	1	piRNA	mmu_piR_005813
mmu-miR-363-3p	79	mature	mir-363
mmu-miR-154-5p	753	mature	mir-154
mmu_piR_010029	1	piRNA	mmu_piR_010029
mmu-miR-7a-5p	476	mature	mir-7
mmu-miR-877-3p	58	mature	mir-877
mmu_piR_028927	1	piRNA	mmu_piR_028927
mmu-miR-128-2-5p	48	hairpin	mir-128
mmu-miR-181a-2-3p	2	mature	mir-181
mmu-miR-300-3p	1	mature	mir-154
mmu_piR_012009	1	piRNA	mmu_piR_012009
mmu-miR-99a-5p	1810	mature	mir-10
mmu_piR_028292	38	piRNA	mmu_piR_028292
mmu-miR-7687-3p	1	hairpin	undef
mmu-miR-34c-5p	1	hairpin	mir-34
mmu_piR_017540	1	piRNA	mmu_piR_017540
mmu_piR_009380	1	piRNA	mmu_piR_009380
mmu_piR_015053	1	piRNA	mmu_piR_015053
mmu_piR_001291	2	piRNA	mmu_piR_001291
mmu_piR_022652	1	piRNA	mmu_piR_022652
mmu_piR_016211	1	piRNA	mmu_piR_016211
mmu_piR_030428	1	piRNA	mmu_piR_030428
mmu_piR_000209	102	piRNA	mmu_piR_000209
mmu_piR_009360	72	piRNA	mmu_piR_009360
mmu-miR-323-5p	1	mature	mir-154
mmu-miR-375-3p	1791	hairpin	mir-375
mmu_piR_019734	1	piRNA	mmu_piR_019734
mmu_piR_034184	2	piRNA	mmu_piR_034184
mmu_piR_034572	1	piRNA	mmu_piR_034572
mmu_piR_015369	1	piRNA	mmu_piR_015369
mmu_piR_031037	3	piRNA	mmu_piR_031037
mmu_piR_037498	1	piRNA	mmu_piR_037498
mmu_piR_002629	1	piRNA	mmu_piR_002629
mmu-miR-144-5p	1	mature	mir-144
mmu_piR_020948	1	piRNA	mmu_piR_020948
mmu_piR_032516	2	piRNA	mmu_piR_032516
mmu-miR-150-5p	259	hairpin	mir-150
mmu_piR_010469	1	piRNA	mmu_piR_010469
mmu_piR_033780	1	piRNA	mmu_piR_033780
mmu_piR_005932	1	piRNA	mmu_piR_005932
mmu_piR_001297	1	piRNA	mmu_piR_001297
mmu_piR_030955	6	piRNA	mmu_piR_030955
mmu-miR-362-3p	87	hairpin	mir-362
mmu_piR_019354	2	piRNA	mmu_piR_019354
mmu-miR-714	78	hairpin	undef
mmu_piR_038969	1	piRNA	mmu_piR_038969
mmu-miR-330-3p	179	hairpin	mir-330
mmu-miR-1934-5p	57	hairpin	undef
mmu-miR-450a-5p	1	mature	mir-450
mmu_piR_009721	5	piRNA	mmu_piR_009721
mmu_piR_001217	1	piRNA	mmu_piR_001217
mmu-miR-145a-3p	1	mature	mir-145
mmu_piR_034464	2	piRNA	mmu_piR_034464
mmu-miR-1983	320	hairpin	undef
mmu_piR_025910	1	piRNA	mmu_piR_025910
mmu_piR_029118	2	piRNA	mmu_piR_029118
mmu_piR_024277	41	piRNA	mmu_piR_024277
mmu-miR-434-3p	113	mature	mir-434
mmu_piR_011663	56	piRNA	mmu_piR_011663
mmu-miR-471-3p	1	hairpin	mir-471
mmu_piR_032901	38	piRNA	mmu_piR_032901
mmu_piR_028996	1	piRNA	mmu_piR_028996
mmu-miR-7043-3p	4	hairpin	undef
mmu-let-7k	7784	hairpin	undef
mmu_piR_005874	15	piRNA	mmu_piR_005874
mmu-miR-218-5p	215	hairpin	mir-218
mmu-miR-193a-3p	47	hairpin	mir-193
mmu-miR-204-5p	185	hairpin	mir-204
mmu_piR_000949	2	piRNA	mmu_piR_000949
mmu-miR-802-5p	127	hairpin	mir-802
mmu_piR_027411	1	piRNA	mmu_piR_027411
mmu_piR_022598	5	piRNA	mmu_piR_022598
mmu_piR_031955	1	piRNA	mmu_piR_031955
mmu-miR-1843b-5p	33	hairpin	mir-1843
mmu_piR_023196	29	piRNA	mmu_piR_023196
mmu_piR_039094	1	piRNA	mmu_piR_039094
mmu_piR_032183	1	piRNA	mmu_piR_032183
mmu-miR-6408	43	hairpin	undef
mmu_piR_004154	2	piRNA	mmu_piR_004154
mmu_piR_027168	1	piRNA	mmu_piR_027168
mmu_piR_030194	92	piRNA	mmu_piR_030194
mmu-let-7f-5p	4731	hairpin	let-7
mmu-miR-22-3p	17415	hairpin	mir-22
mmu-miR-26b-5p	824	hairpin	mir-26
mmu_piR_005164	1	piRNA	mmu_piR_005164
mmu_piR_035880	1	piRNA	mmu_piR_035880
mmu_piR_026548	1	piRNA	mmu_piR_026548
mmu-miR-1843b-3p	67	mature	mir-1843
mmu_piR_017341	1106	piRNA	mmu_piR_017341
mmu_piR_004239	1	piRNA	mmu_piR_004239
mmu-miR-451a	75045	hairpin	mir-451
mmu-miR-194-5p	2044	hairpin	mir-194
mmu_piR_019823	1	piRNA	mmu_piR_019823
mmu-miR-323-3p	2	hairpin	mir-154
mmu_piR_017602	1	piRNA	mmu_piR_017602
mmu-miR-30d-5p	1406	hairpin	mir-30
mmu-miR-140-5p	207	mature	mir-140
mmu-miR-7036b-3p	1	hairpin	undef
mmu-miR-30b-5p	76	hairpin	mir-30
mmu_piR_027990	1	piRNA	mmu_piR_027990
mmu_piR_029686	1	piRNA	mmu_piR_029686
mmu_piR_031756	1	piRNA	mmu_piR_031756
mmu-miR-363-3p	1	hairpin	mir-363
mmu-miR-3074-2-3p	133	mature	mir-3074
mmu-miR-133b-3p	52	hairpin	mir-133
mmu-miR-7a-1-3p	71	hairpin	mir-7
mmu-miR-1843a-5p	3	hairpin	mir-1843
mmu_piR_016095	1	piRNA	mmu_piR_016095
mmu_piR_015364	1	piRNA	mmu_piR_015364
mmu-miR-196b-5p	256	hairpin	mir-196
mmu_piR_004806	1	piRNA	mmu_piR_004806
mmu-miR-425-3p	851	hairpin	mir-425
mmu_piR_001610	1	piRNA	mmu_piR_001610
mmu-miR-486a-3p	3	hairpin	mir-486
mmu_piR_013797	43	piRNA	mmu_piR_013797
mmu-miR-93-3p	69	hairpin	mir-17
mmu-let-7f-2-3p	120	mature	let-7
mmu_piR_036551	1	piRNA	mmu_piR_036551
mmu-miR-200b-3p	1	mature	mir-8
mmu-miR-149-5p	3406	hairpin	mir-149
mmu_piR_013449	1	piRNA	mmu_piR_013449
mmu_piR_030236	1	piRNA	mmu_piR_030236
mmu_piR_038651	3	piRNA	mmu_piR_038651
mmu_piR_038430	2	piRNA	mmu_piR_038430
mmu_piR_000701	1	piRNA	mmu_piR_000701
mmu-miR-423-5p	639	mature	mir-423
mmu-miR-1191a	107	mature	undef
mmu_piR_006854	1	piRNA	mmu_piR_006854
mmu_piR_023322	1	piRNA	mmu_piR_023322
mmu-miR-30d-5p	1505	mature	mir-30
mmu_piR_039334	2	piRNA	mmu_piR_039334
mmu_piR_001881	1	piRNA	mmu_piR_001881
mmu_piR_016650	112	piRNA	mmu_piR_016650
mmu_piR_003342	2	piRNA	mmu_piR_003342
mmu-miR-320-3p	768	mature	mir-320
mmu-miR-223-3p	243	mature	mir-223
mmu_piR_006827	1	piRNA	mmu_piR_006827
mmu-miR-140-5p	219	hairpin	mir-140
mmu-miR-3060-3p	2130	hairpin	undef
mmu_piR_001527	59	piRNA	mmu_piR_001527
mmu-miR-34b-3p	143	mature	mir-34
mmu_piR_011724	3	piRNA	mmu_piR_011724
mmu_piR_018683	1	piRNA	mmu_piR_018683
mmu_piR_033240	1	piRNA	mmu_piR_033240
mmu-miR-28a-3p	2	hairpin	mir-28
mmu-miR-301a-3p	67	hairpin	mir-130
mmu_piR_031282	1	piRNA	mmu_piR_031282
mmu_piR_013682	845	piRNA	mmu_piR_013682
mmu-let-7a-1-3p,mmu-let-7c-2-3p	207	mature	let-7
mmu_piR_032042	1	piRNA	mmu_piR_032042
mmu-miR-196b-5p	741	mature	mir-196
mmu_piR_008200	1	piRNA	mmu_piR_008200
mmu_piR_006211	1	piRNA	mmu_piR_006211
mmu-miR-187-3p	75	mature	mir-187
mmu-miR-1929-3p	48	hairpin	undef
mmu_piR_014950	1	piRNA	mmu_piR_014950
mmu_piR_006824	1	piRNA	mmu_piR_006824
mmu-miR-98-5p	440	hairpin	let-7
mmu-let-7e-3p	290	mature	let-7
mmu_piR_016336	1	piRNA	mmu_piR_016336
mmu-miR-10a-3p	80	hairpin	mir-10
mmu_piR_030344	1	piRNA	mmu_piR_030344
mmu_piR_022304	1	piRNA	mmu_piR_022304
mmu-miR-130b-5p	1	mature	mir-130
mmu_piR_029183	61	piRNA	mmu_piR_029183
mmu_piR_023459	1	piRNA	mmu_piR_023459
mmu_piR_020770	1	piRNA	mmu_piR_020770
mmu-miR-296-5p	3	hairpin	mir-296
mmu-miR-763	39	hairpin	mir-763
mmu_piR_033428	7	piRNA	mmu_piR_033428
mmu_piR_009370	1	piRNA	mmu_piR_009370
mmu_piR_020605	1	piRNA	mmu_piR_020605
mmu-miR-211-5p	1	hairpin	mir-204
mmu-miR-1839-3p	75	hairpin	mir-1839
mmu_piR_028506	1	piRNA	mmu_piR_028506
mmu-miR-3572-3p	54	mature	mir-3572
mmu_piR_039842	1	piRNA	mmu_piR_039842
mmu_piR_012604	1	piRNA	mmu_piR_012604
mmu-miR-181a-2-3p	71	hairpin	mir-181
mmu_piR_037790	1	piRNA	mmu_piR_037790
mmu_piR_018168	1	piRNA	mmu_piR_018168
mmu_piR_003588	1	piRNA	mmu_piR_003588
mmu_piR_039351	1	piRNA	mmu_piR_039351
mmu_piR_025289	1	piRNA	mmu_piR_025289
mmu-miR-146a-5p	13864	hairpin	mir-146
mmu_piR_027027	33	piRNA	mmu_piR_027027
mmu_piR_032917	4	piRNA	mmu_piR_032917
mmu_piR_020182	44	piRNA	mmu_piR_020182
mmu-miR-466k	52	hairpin	mir-466
mmu-miR-138-5p	2	mature	mir-138
mmu-miR-144-3p	608	hairpin	mir-144
mmu_piR_038139	5	piRNA	mmu_piR_038139
mmu_piR_021432	2	piRNA	mmu_piR_021432
mmu-miR-15b-3p	383	hairpin	mir-15
mmu_piR_012603	1	piRNA	mmu_piR_012603
mmu-miR-381-3p	1	mature	mir-154
mmu_piR_034335	1	piRNA	mmu_piR_034335
mmu-miR-193b-3p	125	mature	mir-193
mmu-miR-181a-1-3p	1	mature	mir-181
mmu_piR_011652	1	piRNA	mmu_piR_011652
mmu_piR_031475	42	piRNA	mmu_piR_031475
mmu_piR_020492	1	piRNA	mmu_piR_020492
mmu_piR_010272	1	piRNA	mmu_piR_010272
mmu_piR_028460	1	piRNA	mmu_piR_028460
mmu-miR-292a-5p	1	hairpin	mir-290
mmu_piR_011351	1	piRNA	mmu_piR_011351
mmu_piR_019253	123	piRNA	mmu_piR_019253
mmu_piR_014947	52	piRNA	mmu_piR_014947
mmu-miR-139-5p	3439	mature	mir-139
mmu_piR_009615	1	piRNA	mmu_piR_009615
mmu-let-7a-5p	7524	hairpin	let-7
mmu_piR_002031	1	piRNA	mmu_piR_002031
mmu_piR_011309	1	piRNA	mmu_piR_011309
mmu_piR_001499	1	piRNA	mmu_piR_001499
mmu_piR_030062	1	piRNA	mmu_piR_030062
mmu_piR_010700	5	piRNA	mmu_piR_010700
mmu_piR_039885	1	piRNA	mmu_piR_039885
mmu-miR-669l-5p	1	mature	mir-467
mmu_piR_034092	1	piRNA	mmu_piR_034092
mmu_piR_030899	1	piRNA	mmu_piR_030899
mmu_piR_012179	1	piRNA	mmu_piR_012179
mmu-miR-3057-5p	52	hairpin	undef
mmu-miR-125b-5p	63	mature	mir-10
mmu_piR_000622	1	piRNA	mmu_piR_000622
mmu_piR_023529	1	piRNA	mmu_piR_023529
mmu_piR_037209	1	piRNA	mmu_piR_037209
mmu_piR_013264	1	piRNA	mmu_piR_013264
mmu_piR_017533	1	piRNA	mmu_piR_017533
mmu_piR_018880	1	piRNA	mmu_piR_018880
mmu-miR-23a-3p	26410	hairpin	mir-23
mmu_piR_027306	1	piRNA	mmu_piR_027306
mmu-miR-1945	2	hairpin	undef
mmu-miR-7073-3p	1	hairpin	undef
mmu_piR_020788	15	piRNA	mmu_piR_020788
mmu_piR_015232	1	piRNA	mmu_piR_015232
mmu-miR-1964-3p	104	mature	undef
mmu-miR-182-3p	82	hairpin	mir-182
mmu_piR_023412	1	piRNA	mmu_piR_023412
mmu-miR-760-3p	1	hairpin	mir-760
mmu-miR-369-3p	69	hairpin	mir-154
mmu-miR-7073-5p	1	hairpin	undef
mmu_piR_034933	1	piRNA	mmu_piR_034933
mmu_piR_005329	1	piRNA	mmu_piR_005329
mmu-miR-290a-3p	26	hairpin	mir-290
mmu-miR-99b-3p	2	hairpin	mir-10
mmu_piR_038777	1	piRNA	mmu_piR_038777
mmu_piR_008469	1	piRNA	mmu_piR_008469
mmu_piR_021661	1	piRNA	mmu_piR_021661
mmu_piR_011127	57	piRNA	mmu_piR_011127
mmu-miR-7008-3p	1	hairpin	undef
mmu-miR-7052-5p	51	hairpin	undef
mmu_piR_011493	1	piRNA	mmu_piR_011493
mmu-miR-191-3p	50	mature	mir-191
mmu-miR-467e-5p	1	mature	mir-467
mmu-miR-22-5p	279	hairpin	mir-22
mmu_piR_009309	1	piRNA	mmu_piR_009309
mmu_piR_032948	1	piRNA	mmu_piR_032948
mmu-miR-122-5p	11583	hairpin	mir-122
mmu_piR_014897	1	piRNA	mmu_piR_014897
mmu_piR_000273	4	piRNA	mmu_piR_000273
mmu_piR_002899	1	piRNA	mmu_piR_002899
mmu_piR_021513	1	piRNA	mmu_piR_021513
mmu-miR-26a-5p	3695	mature	mir-26
mmu_piR_038900	1	piRNA	mmu_piR_038900
mmu_piR_018813	1	piRNA	mmu_piR_018813
mmu_piR_034302	1	piRNA	mmu_piR_034302
mmu_piR_026423	1	piRNA	mmu_piR_026423
mmu-miR-16-5p	7794	mature	mir-15
mmu-miR-6967-3p	1	hairpin	mir-6967
mmu_piR_036749	1	piRNA	mmu_piR_036749
mmu-miR-3470a	1	mature	mir-3470
mmu-miR-218-5p	19	mature	mir-218
mmu_piR_000616	1	piRNA	mmu_piR_000616
mmu-miR-370-5p	1	mature	mir-370
mmu-miR-191-5p	1983	hairpin	mir-191
mmu_piR_011988	99	piRNA	mmu_piR_011988
mmu-miR-185-5p	309	hairpin	mir-185
mmu_piR_014424	70	piRNA	mmu_piR_014424
mmu-miR-143-3p	658	mature	mir-143
mmu-miR-410-3p	1	hairpin	mir-154
mmu-miR-203b-5p	132	hairpin	undef
mmu_piR_012849	1	piRNA	mmu_piR_012849
mmu_piR_000069	1	piRNA	mmu_piR_000069
mmu-miR-215-5p	299	hairpin	mir-192
mmu_piR_038916	1	piRNA	mmu_piR_038916
mmu_piR_000120	1	piRNA	mmu_piR_000120
mmu-miR-130a-3p	298	hairpin	mir-130
mmu_piR_032700	3	piRNA	mmu_piR_032700
mmu-miR-499-5p	69	hairpin	mir-499
mmu_piR_039356	2	piRNA	mmu_piR_039356
mmu-miR-15a-5p	452	hairpin	mir-15
mmu_piR_033918	1	piRNA	mmu_piR_033918
mmu_piR_009075	30	piRNA	mmu_piR_009075
mmu-miR-871-5p	1	hairpin	mir-743
mmu-miR-185-5p	508	mature	mir-185
mmu-miR-872-5p	193	hairpin	mir-872
mmu-miR-15b-5p	489	mature	mir-15
mmu_piR_018572	1	piRNA	mmu_piR_018572
mmu-miR-138-2-3p	1	mature	mir-138
mmu-miR-6937-5p	31	hairpin	undef
mmu_piR_027961	1	piRNA	mmu_piR_027961
mmu-miR-615-3p	104	mature	mir-615
mmu-miR-370-3p	1	mature	mir-370
mmu_piR_039060	1	piRNA	mmu_piR_039060
mmu-miR-326-3p	1527	hairpin	mir-326
mmu_piR_036161	1	piRNA	mmu_piR_036161
mmu_piR_011342	1	piRNA	mmu_piR_011342
mmu-miR-130b-5p	1	hairpin	mir-130
mmu_piR_020519	48	piRNA	mmu_piR_020519
mmu-miR-125a-5p	2068	hairpin	mir-10
mmu_piR_039662	1	piRNA	mmu_piR_039662
mmu_piR_010408	1	piRNA	mmu_piR_010408
mmu-miR-3058-3p	209	hairpin	undef
mmu_piR_007844	1	piRNA	mmu_piR_007844
mmu-miR-192-5p	13221	hairpin	mir-192
mmu_piR_008794	1	piRNA	mmu_piR_008794
mmu_piR_020917	1	piRNA	mmu_piR_020917
mmu-miR-423-3p	3326	mature	mir-423
mmu_piR_027322	1	piRNA	mmu_piR_027322
mmu_piR_016422	18	piRNA	mmu_piR_016422
mmu_piR_004643	2	piRNA	mmu_piR_004643
mmu_piR_039049	13	piRNA	mmu_piR_039049
mmu_piR_030040	1	piRNA	mmu_piR_030040
mmu_piR_032370	1	piRNA	mmu_piR_032370
mmu-miR-194-5p	117	mature	mir-194
mmu-miR-152-3p	41	mature	mir-148
mmu-miR-501-3p	83	mature	mir-500
mmu_piR_012268	1	piRNA	mmu_piR_012268
mmu-miR-181b-5p	1	mature	mir-181
mmu_piR_007724	51	piRNA	mmu_piR_007724
mmu_piR_038312	1	piRNA	mmu_piR_038312
mmu-miR-8112	921	mature	undef
mmu_piR_017494	1	piRNA	mmu_piR_017494
mmu_piR_005894	1	piRNA	mmu_piR_005894
mmu-miR-1306-5p	168	hairpin	mir-1306
mmu_piR_038915	1	piRNA	mmu_piR_038915
mmu_piR_021519	1	piRNA	mmu_piR_021519
mmu_piR_000691	1646	piRNA	mmu_piR_000691
mmu-miR-8116	159	hairpin	undef
mmu_piR_016551	1	piRNA	mmu_piR_016551
mmu_piR_031448	368	piRNA	mmu_piR_031448
mmu_piR_004555	1	piRNA	mmu_piR_004555
mmu_piR_011845	1	piRNA	mmu_piR_011845
mmu-miR-383-5p	1	hairpin	mir-383
mmu-miR-872-3p	604	hairpin	mir-872
mmu_piR_010900	1	piRNA	mmu_piR_010900
mmu_piR_030961	4	piRNA	mmu_piR_030961
mmu-miR-143-3p	555	hairpin	mir-143
mmu_piR_006945	1	piRNA	mmu_piR_006945
mmu-miR-423-5p	315	hairpin	mir-423
mmu-miR-142a-3p	60	mature	mir-142
mmu-miR-101a-3p	1	hairpin	mir-101
mmu_piR_020712	1	piRNA	mmu_piR_020712
mmu-miR-140-3p	90	mature	mir-140
mmu_piR_009082	42	piRNA	mmu_piR_009082
mmu_piR_009869	1	piRNA	mmu_piR_009869
mmu-miR-200b-3p	1	hairpin	mir-8
mmu-miR-5620-5p	1	hairpin	undef
mmu_piR_016719	1	piRNA	mmu_piR_016719
mmu-miR-26b-5p	215	mature	mir-26
mmu-miR-7009-3p	40	hairpin	undef
mmu-miR-3965	1	hairpin	undef
mmu-miR-7075-3p	3	mature	undef
mmu_piR_012051	1	piRNA	mmu_piR_012051
mmu-miR-99b-5p	908	mature	mir-10
mmu_piR_000815	32	piRNA	mmu_piR_000815
mmu-miR-223-3p	496	hairpin	mir-223
mmu-miR-361-5p	24	mature	mir-361
mmu_piR_013592	3	piRNA	mmu_piR_013592
mmu-miR-15b-5p	1018	hairpin	mir-15
mmu-miR-186-5p	1	mature	mir-186
mmu_piR_017718	40	piRNA	mmu_piR_017718
mmu_piR_009245	1	piRNA	mmu_piR_009245
mmu_piR_020383	2	piRNA	mmu_piR_020383
mmu_piR_010009	1	piRNA	mmu_piR_010009
mmu_piR_037098	1	piRNA	mmu_piR_037098
mmu-miR-322-5p	211	mature	mir-322
mmu-miR-7016-3p	32	hairpin	undef
mmu-miR-501-3p	2	hairpin	mir-500
mmu-miR-574-3p	76	hairpin	mir-574
mmu_piR_027023	4	piRNA	mmu_piR_027023
mmu-miR-23b-5p	54	hairpin	mir-23
mmu-miR-5126	794	mature	undef
mmu_piR_039414	17	piRNA	mmu_piR_039414
mmu_piR_012417	1	piRNA	mmu_piR_012417
mmu_piR_035188	66	piRNA	mmu_piR_035188
mmu_piR_014539	1	piRNA	mmu_piR_014539
mmu_piR_031972	76	piRNA	mmu_piR_031972
mmu-miR-6961-5p	116	mature	undef
mmu_piR_001526	65	piRNA	mmu_piR_001526
mmu-miR-471-3p	2	mature	mir-471
mmu_piR_028639	1	piRNA	mmu_piR_028639
mmu_piR_030423	44	piRNA	mmu_piR_030423
mmu_piR_019157	2	piRNA	mmu_piR_019157
mmu_piR_013165	40	piRNA	mmu_piR_013165
mmu_piR_020885	1	piRNA	mmu_piR_020885
mmu_piR_019409	1	piRNA	mmu_piR_019409
mmu_piR_007727	1	piRNA	mmu_piR_007727
mmu-miR-877-3p	206	hairpin	mir-877
mmu_piR_033115	1	piRNA	mmu_piR_033115
mmu_piR_039468	1	piRNA	mmu_piR_039468
mmu-miR-328-3p	11118	mature	mir-328
mmu_piR_009377	1	piRNA	mmu_piR_009377
mmu-miR-467c-5p	71	mature	mir-467
mmu_piR_038629	1	piRNA	mmu_piR_038629
mmu-miR-21a-5p	16819	hairpin	mir-21
mmu-miR-384-5p	8	mature	mir-384
mmu_piR_006855	3	piRNA	mmu_piR_006855
mmu-miR-652-3p	4999	mature	mir-652
mmu_piR_013603	1	piRNA	mmu_piR_013603
mmu-miR-485-5p	71	hairpin	mir-485
mmu-let-7c-5p	2369	hairpin	let-7
mmu-miR-126a-3p	567	mature	mir-126
mmu_piR_024375	1	piRNA	mmu_piR_024375
mmu_piR_002757	58	piRNA	mmu_piR_002757
mmu_piR_024598	1	piRNA	mmu_piR_024598
mmu_piR_038351	165	piRNA	mmu_piR_038351
mmu-let-7f-1-3p	1	mature	let-7
mmu_piR_033559	1	piRNA	mmu_piR_033559
mmu-miR-7051-5p	48	hairpin	undef
mmu-miR-5126	8826	hairpin	undef
mmu_piR_038864	1	piRNA	mmu_piR_038864
mmu_piR_025264	2	piRNA	mmu_piR_025264
mmu_piR_038979	1	piRNA	mmu_piR_038979
mmu_piR_036171	1	piRNA	mmu_piR_036171
mmu_piR_036523	1	piRNA	mmu_piR_036523
mmu-let-7a-5p	15229	mature	let-7
mmu-miR-202-5p	4	mature	mir-202
mmu-miR-3475-5p	82	hairpin	undef
mmu_piR_039966	2	piRNA	mmu_piR_039966
mmu-let-7a-1-3p,mmu-let-7c-2-3p	1659	hairpin	let-7
mmu-miR-322-3p	83	mature	mir-322
mmu_piR_021829	40	piRNA	mmu_piR_021829
mmu_piR_035491	40	piRNA	mmu_piR_035491
mmu-miR-6910-3p	2	hairpin	undef
mmu-miR-872-5p	878	mature	mir-872
mmu_piR_009279	1	piRNA	mmu_piR_009279
mmu_piR_020900	1	piRNA	mmu_piR_020900
mmu_piR_024761	1	piRNA	mmu_piR_024761
mmu-miR-7052-3p	82	hairpin	undef
mmu_piR_030446	1	piRNA	mmu_piR_030446
mmu-miR-500-3p	1	mature	mir-500
mmu-miR-674-3p	1	hairpin	mir-674
mmu-miR-200b-5p	50	hairpin	mir-8
mmu-let-7e-5p	1	mature	let-7
mmu-miR-138-5p	111	hairpin	mir-138
mmu_piR_006602	41	piRNA	mmu_piR_006602
mmu_piR_039794	1	piRNA	mmu_piR_039794
mmu-miR-151-3p	63	hairpin	mir-28
mmu_piR_017753	1	piRNA	mmu_piR_017753
mmu_piR_025638	1	piRNA	mmu_piR_025638
mmu_piR_012584	30	piRNA	mmu_piR_012584
mmu_piR_004939	2	piRNA	mmu_piR_004939
mmu-miR-7662-3p	1	hairpin	undef
mmu-miR-450a-5p	1	hairpin	mir-450
mmu_piR_007337	1	piRNA	mmu_piR_007337
mmu-miR-7002-5p	4	hairpin	undef
mmu_piR_025452	1	piRNA	mmu_piR_025452
mmu-miR-425-3p	264	mature	mir-425
mmu-miR-2861	2	hairpin	mir-2861
mmu-miR-3473c	57	hairpin	mir-3473
mmu-miR-7023-5p	42	hairpin	undef
mmu-miR-126a-3p	199	hairpin	mir-126
mmu-miR-1982-3p	28	hairpin	undef
mmu-miR-6538	289	hairpin	undef
mmu-miR-142b	1	hairpin	mir-142
mmu-miR-532-5p	98	hairpin	mir-188
mmu_piR_000870	93	piRNA	mmu_piR_000870
mmu_piR_010090	1	piRNA	mmu_piR_010090
mmu_piR_022052	1	piRNA	mmu_piR_022052
mmu-miR-709	56	mature	undef
mmu_piR_022201	2	piRNA	mmu_piR_022201
mmu_piR_034449	1	piRNA	mmu_piR_034449
mmu_piR_038339	74	piRNA	mmu_piR_038339
mmu_piR_009991	1	piRNA	mmu_piR_009991
mmu-miR-326-3p	344	mature	mir-326
mmu-miR-341-3p	7	hairpin	mir-341
mmu_piR_025624	1	piRNA	mmu_piR_025624
mmu_piR_009477	1	piRNA	mmu_piR_009477
mmu-miR-132-5p	2	hairpin	mir-132
mmu_piR_038352	1	piRNA	mmu_piR_038352
mmu_piR_026073	2	piRNA	mmu_piR_026073
mmu-miR-93-3p	55	mature	mir-17
mmu-miR-6944-5p	57	hairpin	undef
mmu_piR_022616	1	piRNA	mmu_piR_022616
mmu-miR-204-5p	477	mature	mir-204
mmu_piR_022526	2	piRNA	mmu_piR_022526
mmu_piR_014946	14	piRNA	mmu_piR_014946
mmu-miR-9b-3p	3	hairpin	undef
mmu-miR-328-3p	44870	hairpin	mir-328
mmu_piR_012193	40	piRNA	mmu_piR_012193
mmu_piR_022097	252	piRNA	mmu_piR_022097
mmu_piR_035757	2	piRNA	mmu_piR_035757
mmu-miR-652-3p	1263	hairpin	mir-652
mmu_piR_038567	1	piRNA	mmu_piR_038567
mmu_piR_014483	1	piRNA	mmu_piR_014483
mmu-miR-30c-5p	130	hairpin	mir-30
mmu_piR_011539	1	piRNA	mmu_piR_011539
mmu-miR-23b-3p	72	hairpin	mir-23
mmu_piR_026595	1	piRNA	mmu_piR_026595
mmu_piR_007785	1	piRNA	mmu_piR_007785
mmu_piR_036547	1	piRNA	mmu_piR_036547
mmu-miR-503-3p	75	mature	mir-503
mmu-miR-425-5p	723	hairpin	mir-425
mmu_piR_028636	1	piRNA	mmu_piR_028636
mmu-miR-486b-3p	726	mature	mir-486
mmu_piR_025260	1	piRNA	mmu_piR_025260
mmu-miR-574-3p	579	mature	mir-574
mmu_piR_027734	1	piRNA	mmu_piR_027734
mmu_piR_009571	1	piRNA	mmu_piR_009571
mmu_piR_000958	45	piRNA	mmu_piR_000958
mmu_piR_015833	1	piRNA	mmu_piR_015833
mmu-miR-1895	84	mature	undef
mmu_piR_036815	1	piRNA	mmu_piR_036815
mmu-miR-151-5p	412	mature	mir-28
mmu_piR_032165	1	piRNA	mmu_piR_032165
mmu-miR-1306-3p	68	hairpin	mir-1306
mmu-miR-6980-3p	47	hairpin	undef
mmu-miR-133a-3p	63	mature	mir-133
mmu_piR_001819	1	piRNA	mmu_piR_001819
mmu-miR-10a-5p	2556	mature	mir-10
mmu_piR_000499	4	piRNA	mmu_piR_000499
mmu-let-7b-5p	2512	hairpin	let-7
mmu_piR_032602	1	piRNA	mmu_piR_032602
mmu-miR-6941-5p	40	hairpin	undef
mmu-miR-324-3p	1	hairpin	mir-324
mmu_piR_028026	1	piRNA	mmu_piR_028026
mmu-miR-6980-5p	37	hairpin	undef
mmu_piR_004956	63	piRNA	mmu_piR_004956
mmu-let-7b-5p	1848	mature	let-7
mmu_piR_004115	1	piRNA	mmu_piR_004115
mmu_piR_011448	16	piRNA	mmu_piR_011448
mmu_piR_035875	1	piRNA	mmu_piR_035875
mmu_piR_034395	2	piRNA	mmu_piR_034395
mmu-miR-127-3p	175	hairpin	mir-127
mmu_piR_008599	1	piRNA	mmu_piR_008599
mmu_piR_007549	42	piRNA	mmu_piR_007549
mmu_piR_018409	37	piRNA	mmu_piR_018409
mmu-miR-26a-5p	314	hairpin	mir-26
mmu_piR_002962	84	piRNA	mmu_piR_002962
mmu_piR_011452	1	piRNA	mmu_piR_011452
mmu_piR_000219	57	piRNA	mmu_piR_000219
mmu_piR_036718	9	piRNA	mmu_piR_036718
mmu-miR-499-5p	565	mature	mir-499
mmu_piR_037981	1	piRNA	mmu_piR_037981
mmu-miR-486a-5p,mmu-miR-486b-5p	5734	mature	mir-486
mmu-miR-30e-3p	72	mature	mir-30
mmu_piR_020337	31	piRNA	mmu_piR_020337
mmu_piR_035749	1	piRNA	mmu_piR_035749
mmu_piR_020478	2	piRNA	mmu_piR_020478
mmu_piR_002858	1	piRNA	mmu_piR_002858
mmu-miR-25-5p	1	hairpin	mir-25
mmu_piR_007201	1	piRNA	mmu_piR_007201
mmu-miR-2137	1	hairpin	undef
mmu-miR-382-5p	1	mature	mir-154
mmu-miR-340-3p	1	hairpin	mir-340
mmu-miR-192-5p	17062	mature	mir-192
mmu-miR-99a-5p	2811	hairpin	mir-10
mmu-miR-770-5p	1	hairpin	mir-770
mmu_piR_024818	1	piRNA	mmu_piR_024818
mmu-miR-146b-5p	91	hairpin	mir-146
mmu_piR_036377	141	piRNA	mmu_piR_036377
mmu-miR-144-5p	70	hairpin	mir-144
mmu-miR-12190-3p	4	hairpin	undef
mmu_piR_035881	1	piRNA	mmu_piR_035881
mmu_piR_008826	1	piRNA	mmu_piR_008826
mmu_piR_018942	1	piRNA	mmu_piR_018942
mmu_piR_028154	1	piRNA	mmu_piR_028154
mmu_piR_027540	1	piRNA	mmu_piR_027540
mmu-let-7e-3p	234	hairpin	let-7
mmu_piR_031825	1	piRNA	mmu_piR_031825
mmu_piR_018376	1	piRNA	mmu_piR_018376
mmu_piR_021580	1	piRNA	mmu_piR_021580
mmu_piR_031973	1	piRNA	mmu_piR_031973
mmu-miR-378c	3	mature	undef
mmu_piR_028614	1	piRNA	mmu_piR_028614
mmu_piR_004567	59	piRNA	mmu_piR_004567
mmu-miR-350-3p	280	hairpin	mir-350
mmu_piR_012675	1	piRNA	mmu_piR_012675
mmu-miR-25-3p	11933	mature	mir-25
mmu_piR_002673	1	piRNA	mmu_piR_002673
mmu-miR-6956-3p	76	hairpin	undef
mmu_piR_033307	1	piRNA	mmu_piR_033307
mmu-miR-429-3p	916	hairpin	mir-8
mmu-let-7f-1-3p	1179	hairpin	let-7
mmu_piR_029963	1	piRNA	mmu_piR_029963
mmu-miR-212-3p	309	hairpin	mir-132
mmu_piR_034691	2	piRNA	mmu_piR_034691
mmu_piR_007815	1	piRNA	mmu_piR_007815
mmu-miR-330-5p	317	hairpin	mir-330
mmu_piR_031218	54	piRNA	mmu_piR_031218
mmu-miR-29b-1-5p	63	hairpin	mir-29
mmu-miR-302b-3p	1	hairpin	mir-302
mmu_piR_022428	37	piRNA	mmu_piR_022428
mmu_piR_011365	1	piRNA	mmu_piR_011365
mmu-miR-106b-3p	37	hairpin	mir-17
mmu_piR_007835	1	piRNA	mmu_piR_007835
mmu_piR_020211	1	piRNA	mmu_piR_020211
mmu_piR_004218	1	piRNA	mmu_piR_004218
mmu_piR_038904	1	piRNA	mmu_piR_038904
mmu_piR_037885	1	piRNA	mmu_piR_037885
mmu-miR-19b-3p	338	mature	mir-19
mmu-miR-344-3p	1	hairpin	mir-344
mmu_piR_006847	1	piRNA	mmu_piR_006847
mmu-miR-676-3p	531	mature	mir-676
mmu_piR_024039	1	piRNA	mmu_piR_024039
mmu_piR_005028	1	piRNA	mmu_piR_005028
mmu_piR_001523	38	piRNA	mmu_piR_001523
mmu_piR_024934	1	piRNA	mmu_piR_024934
mmu_piR_033406	1	piRNA	mmu_piR_033406
mmu_piR_012718	1	piRNA	mmu_piR_012718
mmu-miR-1b-5p	373	hairpin	mir-1
mmu_piR_023535	1	piRNA	mmu_piR_023535
mmu-let-7g-5p	6721	mature	let-7
mmu_piR_030952	1	piRNA	mmu_piR_030952
mmu-miR-378d	1491	hairpin	undef
mmu-miR-222-3p	55	mature	mir-221
mmu-miR-3471	1	hairpin	mir-3471
mmu_piR_026137	63	piRNA	mmu_piR_026137
mmu_piR_015935	1	piRNA	mmu_piR_015935
mmu_piR_013775	1	piRNA	mmu_piR_013775
mmu-miR-379-5p	130	hairpin	mir-379
mmu_piR_011156	1	piRNA	mmu_piR_011156
mmu_piR_027326	2	piRNA	mmu_piR_027326
mmu_piR_029343	125	piRNA	mmu_piR_029343
mmu-miR-296-5p	136	mature	mir-296
mmu_piR_026602	28	piRNA	mmu_piR_026602
mmu_piR_021796	1	piRNA	mmu_piR_021796
mmu-miR-128-1-5p	13	mature	mir-128
mmu_piR_000620	1	piRNA	mmu_piR_000620
mmu-miR-1983	1130	mature	undef
mmu_piR_033318	1	piRNA	mmu_piR_033318
mmu-miR-181a-5p	355	mature	mir-181
mmu-miR-92a-3p	11597	mature	mir-25
mmu_piR_026161	38	piRNA	mmu_piR_026161
mmu_piR_008392	26	piRNA	mmu_piR_008392
mmu_piR_012054	1	piRNA	mmu_piR_012054
mmu_piR_030222	1	piRNA	mmu_piR_030222
mmu-miR-669b-5p	69	mature	mir-467
mmu_piR_004633	1	piRNA	mmu_piR_004633
mmu_piR_013990	1	piRNA	mmu_piR_013990
mmu-miR-1964-3p	116	hairpin	undef
mmu_piR_021785	2067	piRNA	mmu_piR_021785
mmu_piR_005332	1	piRNA	mmu_piR_005332
mmu-miR-378d	4	mature	undef
mmu_piR_031045	47	piRNA	mmu_piR_031045
mmu_piR_022031	1	piRNA	mmu_piR_022031
mmu-miR-1981-3p	32	hairpin	undef
mmu-miR-146a-5p	35806	mature	mir-146
mmu_piR_024153	1	piRNA	mmu_piR_024153
mmu_piR_015705	1	piRNA	mmu_piR_015705
mmu-miR-93-5p	16068	hairpin	mir-17
mmu_piR_037120	1	piRNA	mmu_piR_037120
mmu-miR-30a-5p	140	mature	mir-30
mmu_piR_024069	1	piRNA	mmu_piR_024069
mmu-miR-1249-3p	192	hairpin	mir-1249
mmu_piR_036323	1	piRNA	mmu_piR_036323
mmu-miR-335-5p	20	hairpin	mir-335
mmu_piR_023622	1	piRNA	mmu_piR_023622
mmu_piR_004010	1	piRNA	mmu_piR_004010
mmu-miR-3965	1	mature	undef
mmu_piR_029916	1	piRNA	mmu_piR_029916
mmu_piR_006457	2	piRNA	mmu_piR_006457
mmu_piR_005211	123	piRNA	mmu_piR_005211
mmu_piR_015673	1	piRNA	mmu_piR_015673
mmu_piR_019445	2	piRNA	mmu_piR_019445
mmu_piR_013474	1	piRNA	mmu_piR_013474
mmu_piR_013286	1	piRNA	mmu_piR_013286
mmu_piR_019061	1	piRNA	mmu_piR_019061
mmu-miR-187-3p	123	hairpin	mir-187
mmu_piR_023630	1	piRNA	mmu_piR_023630
mmu-miR-6538	61	mature	undef
mmu_piR_022859	1	piRNA	mmu_piR_022859
mmu_piR_013328	1	piRNA	mmu_piR_013328
mmu-miR-30a-3p	199	hairpin	mir-30
mmu-miR-24-3p	15136	mature	mir-24
mmu_piR_006351	1	piRNA	mmu_piR_006351
mmu_piR_019578	4	piRNA	mmu_piR_019578
mmu_piR_005160	1	piRNA	mmu_piR_005160
mmu_piR_028055	78	piRNA	mmu_piR_028055
mmu-miR-223-5p	1	mature	mir-223
mmu_piR_030459	1	piRNA	mmu_piR_030459
mmu-let-7d-5p	1715	hairpin	let-7
mmu_piR_006478	1	piRNA	mmu_piR_006478
mmu_piR_039889	1	piRNA	mmu_piR_039889
mmu_piR_000634	1	piRNA	mmu_piR_000634
mmu_piR_017510	1	piRNA	mmu_piR_017510
mmu_piR_015640	4	piRNA	mmu_piR_015640
mmu_piR_023705	1	piRNA	mmu_piR_023705
mmu_piR_017805	1	piRNA	mmu_piR_017805
mmu-miR-1199-5p	1	mature	mir-1199
mmu-miR-9-5p	1	mature	mir-9
mmu_piR_031334	1	piRNA	mmu_piR_031334
mmu_piR_024125	1	piRNA	mmu_piR_024125
mmu_piR_009521	3	piRNA	mmu_piR_009521
mmu-miR-1943-5p	2	hairpin	undef
mmu_piR_010388	2	piRNA	mmu_piR_010388
mmu_piR_036443	11	piRNA	mmu_piR_036443
mmu_piR_023030	1	piRNA	mmu_piR_023030
mmu-miR-6971-3p	9	hairpin	undef
mmu-miR-30c-2-3p	1	hairpin	mir-30
mmu_piR_006097	7	piRNA	mmu_piR_006097
mmu_piR_016639	1	piRNA	mmu_piR_016639
mmu-miR-122-5p	25326	mature	mir-122
mmu_piR_008428	1	piRNA	mmu_piR_008428
mmu_piR_003250	1	piRNA	mmu_piR_003250
mmu-miR-27a-5p	1	mature	mir-27
mmu_piR_033235	1	piRNA	mmu_piR_033235
mmu-miR-202-3p	1	mature	mir-202
mmu-miR-196a-5p	2	mature	mir-196
mmu_piR_015629	108	piRNA	mmu_piR_015629
mmu_piR_031447	1	piRNA	mmu_piR_031447
mmu-miR-470-5p	9	hairpin	mir-743
mmu-miR-369-5p	2	mature	mir-154
mmu_piR_014000	1	piRNA	mmu_piR_014000
mmu-miR-134-5p	61	mature	mir-134
mmu_piR_012172	1	piRNA	mmu_piR_012172
mmu-miR-24-3p	4997	hairpin	mir-24
mmu-miR-1198-5p	33328	mature	undef
mmu_piR_027625	1	piRNA	mmu_piR_027625
mmu-miR-1247-5p	1	hairpin	mir-1247
mmu_piR_019379	1	piRNA	mmu_piR_019379
mmu_piR_035289	1	piRNA	mmu_piR_035289
mmu_piR_000049	1	piRNA	mmu_piR_000049
mmu_piR_029488	1	piRNA	mmu_piR_029488
mmu-miR-935	1980	hairpin	mir-935
mmu_piR_016325	2	piRNA	mmu_piR_016325
mmu_piR_010111	1	piRNA	mmu_piR_010111
mmu-miR-615-3p	48	hairpin	mir-615
mmu_piR_002490	1	piRNA	mmu_piR_002490
mmu_piR_000585	10	piRNA	mmu_piR_000585
mmu_piR_019203	1	piRNA	mmu_piR_019203
mmu_piR_016198	1	piRNA	mmu_piR_016198
mmu_piR_007648	2	piRNA	mmu_piR_007648
mmu_piR_016408	1	piRNA	mmu_piR_016408
mmu-miR-1895	373	hairpin	undef
mmu_piR_026251	10	piRNA	mmu_piR_026251
mmu-miR-3060-5p	57	hairpin	undef
mmu_piR_004858	1	piRNA	mmu_piR_004858
mmu_piR_035282	1	piRNA	mmu_piR_035282
mmu_piR_010684	12	piRNA	mmu_piR_010684
mmu-miR-203-3p	1	mature	mir-203
mmu-miR-3072-3p	49	hairpin	mir-3072
mmu-miR-465a-3p,mmu-miR-465b-3p,mmu-miR-465c-3p	8	hairpin	mir-465
mmu_piR_010485	2	piRNA	mmu_piR_010485
mmu-miR-7071-5p	53	hairpin	undef
mmu_piR_005271	1	piRNA	mmu_piR_005271
mmu_piR_030893	1	piRNA	mmu_piR_030893
mmu-miR-125b-1-3p	79	hairpin	mir-10
mmu-miR-341-3p	344	mature	mir-341
mmu-let-7g-5p	5805	hairpin	let-7
mmu-miR-409-3p	89	hairpin	mir-154
mmu_piR_002435	2	piRNA	mmu_piR_002435
mmu-miR-298-5p	1	mature	mir-298
mmu_piR_020955	2	piRNA	mmu_piR_020955
mmu-let-7e-5p	1	hairpin	let-7
mmu_piR_038000	1	piRNA	mmu_piR_038000
mmu-miR-23a-3p	13024	mature	mir-23
mmu_piR_006451	1	piRNA	mmu_piR_006451
mmu_piR_007526	1	piRNA	mmu_piR_007526
mmu-miR-145a-3p	36	hairpin	mir-145
mmu-miR-6948-3p	56	mature	undef
mmu-miR-17-5p	1	hairpin	mir-17
mmu-miR-100-5p	578	mature	mir-10
mmu_piR_004032	1	piRNA	mmu_piR_004032
mmu-miR-712-3p	51	hairpin	undef
mmu_piR_031538	1	piRNA	mmu_piR_031538
mmu_piR_026780	1	piRNA	mmu_piR_026780
mmu_piR_013385	1	piRNA	mmu_piR_013385
mmu-miR-100-5p	199	hairpin	mir-10
mmu_piR_027722	4	piRNA	mmu_piR_027722
mmu_piR_030361	1	piRNA	mmu_piR_030361
mmu_piR_038081	1	piRNA	mmu_piR_038081
mmu-miR-431-5p	1	hairpin	mir-431
mmu_piR_035659	1	piRNA	mmu_piR_035659
mmu_piR_019711	1	piRNA	mmu_piR_019711
mmu-miR-193b-3p	174	hairpin	mir-193
mmu_piR_033915	1	piRNA	mmu_piR_033915
mmu_piR_024051	1	piRNA	mmu_piR_024051
mmu_piR_013504	1	piRNA	mmu_piR_013504
mmu_piR_025406	2	piRNA	mmu_piR_025406
mmu_piR_016217	1	piRNA	mmu_piR_016217
mmu-miR-149-3p	48	hairpin	mir-149
mmu-miR-18a-3p	54	hairpin	mir-17
mmu-miR-140-3p	168	hairpin	mir-140
mmu_piR_000739	1	piRNA	mmu_piR_000739
mmu_piR_035067	1	piRNA	mmu_piR_035067
mmu-miR-1981-5p	76	hairpin	undef
mmu-miR-145a-5p	10	mature	mir-145
mmu_piR_005994	1	piRNA	mmu_piR_005994
mmu-miR-27b-3p	2864	mature	mir-27
mmu_piR_003294	1	piRNA	mmu_piR_003294
mmu_piR_013991	1	piRNA	mmu_piR_013991
mmu-miR-342-3p	1360	mature	mir-342
mmu_piR_000213	36	piRNA	mmu_piR_000213
mmu-miR-15a-5p	604	mature	mir-15
mmu-miR-7653-3p	72	hairpin	undef
mmu-miR-149-5p	134	mature	mir-149
mmu-miR-28a-5p	2	hairpin	mir-28
mmu_piR_017980	1	piRNA	mmu_piR_017980
mmu-miR-128-3p	1375	mature	mir-128
mmu_piR_011071	3	piRNA	mmu_piR_011071
mmu_piR_038571	2	piRNA	mmu_piR_038571
mmu-miR-27a-5p	85	hairpin	mir-27
mmu_piR_010067	1	piRNA	mmu_piR_010067
mmu_piR_030111	1	piRNA	mmu_piR_030111
mmu-miR-29a-3p	282	mature	mir-29
mmu-miR-144-3p	350	mature	mir-144
mmu_piR_018240	1	piRNA	mmu_piR_018240
mmu_piR_015619	1	piRNA	mmu_piR_015619
mmu_piR_004413	1	piRNA	mmu_piR_004413
mmu_piR_003245	1	piRNA	mmu_piR_003245
mmu_piR_036789	2	piRNA	mmu_piR_036789
mmu_piR_013582	1	piRNA	mmu_piR_013582
mmu-miR-214-3p	90	hairpin	mir-214
mmu_piR_030588	1	piRNA	mmu_piR_030588
mmu_piR_025736	1	piRNA	mmu_piR_025736
mmu-miR-222-3p	341	hairpin	mir-221
mmu_piR_000989	1	piRNA	mmu_piR_000989
mmu_piR_018544	6	piRNA	mmu_piR_018544
mmu-miR-31-5p	27	hairpin	mir-31
mmu-miR-872-3p	371	mature	mir-872
mmu_piR_017768	1	piRNA	mmu_piR_017768
mmu-miR-7043-3p	136	mature	undef
mmu-miR-296-3p	1	mature	mir-296
mmu_piR_032280	1	piRNA	mmu_piR_032280
mmu-miR-27b-3p	28650	hairpin	mir-27
mmu-let-7b-3p	46	hairpin	let-7
mmu_piR_013359	5	piRNA	mmu_piR_013359
mmu_piR_001643	1	piRNA	mmu_piR_001643
mmu_piR_012353	3	piRNA	mmu_piR_012353
mmu_piR_009878	1	piRNA	mmu_piR_009878
mmu-miR-542-5p	137	hairpin	mir-542
mmu-miR-148a-3p	59	mature	mir-148
mmu_piR_023301	3	piRNA	mmu_piR_023301
mmu_piR_023305	58	piRNA	mmu_piR_023305
mmu-miR-7028-3p	14	hairpin	undef
mmu-miR-92b-3p	615	hairpin	mir-25
mmu_piR_013790	1	piRNA	mmu_piR_013790
mmu_piR_028853	1	piRNA	mmu_piR_028853
mmu_piR_011732	1	piRNA	mmu_piR_011732
mmu-miR-344-3p	54	mature	mir-344
mmu-miR-1197-3p	1	mature	mir-379
mmu-miR-652-5p	52	mature	mir-652
mmu-miR-384-3p	1	mature	mir-384
mmu_piR_010331	1	piRNA	mmu_piR_010331
mmu_piR_038497	1	piRNA	mmu_piR_038497
mmu_piR_021530	1	piRNA	mmu_piR_021530
mmu_piR_038135	1	piRNA	mmu_piR_038135
mmu_piR_009490	1	piRNA	mmu_piR_009490
mmu-let-7i-3p	63	hairpin	let-7
mmu_piR_021112	1	piRNA	mmu_piR_021112
mmu_piR_031201	1	piRNA	mmu_piR_031201
mmu_piR_016281	1	piRNA	mmu_piR_016281
mmu_piR_010261	1	piRNA	mmu_piR_010261
mmu_piR_032441	1	piRNA	mmu_piR_032441
mmu_piR_039806	1	piRNA	mmu_piR_039806
mmu-miR-5122	1	hairpin	undef
mmu_piR_024836	1	piRNA	mmu_piR_024836
mmu-miR-99b-5p	653	hairpin	mir-10
mmu_piR_022474	1	piRNA	mmu_piR_022474
mmu-miR-145a-5p	682	hairpin	mir-145
mmu_piR_005034	1	piRNA	mmu_piR_005034
mmu_piR_028208	1	piRNA	mmu_piR_028208
mmu-miR-674-3p	67	mature	mir-674
mmu_piR_031272	1	piRNA	mmu_piR_031272
mmu-miR-10b-5p	372	hairpin	mir-10
mmu_piR_004378	1	piRNA	mmu_piR_004378
mmu_piR_003274	1	piRNA	mmu_piR_003274
mmu_piR_006312	1	piRNA	mmu_piR_006312
mmu_piR_036800	34	piRNA	mmu_piR_036800
mmu_piR_019688	1	piRNA	mmu_piR_019688
mmu_piR_004203	1	piRNA	mmu_piR_004203
mmu_piR_008340	1	piRNA	mmu_piR_008340
mmu_piR_032983	2	piRNA	mmu_piR_032983
mmu_piR_000758	1	piRNA	mmu_piR_000758
mmu_piR_025209	1	piRNA	mmu_piR_025209
mmu_piR_013401	1	piRNA	mmu_piR_013401
mmu-miR-29b-3p	35	hairpin	mir-29
mmu_piR_010139	1	piRNA	mmu_piR_010139
mmu_piR_039194	5	piRNA	mmu_piR_039194
mmu_piR_015400	1	piRNA	mmu_piR_015400
mmu_piR_033229	1	piRNA	mmu_piR_033229
mmu-miR-378c	3	hairpin	undef
mmu-miR-181d-5p	1	mature	mir-181
mmu-miR-125b-5p	1594	hairpin	mir-10
mmu_piR_024994	1	piRNA	mmu_piR_024994
mmu-miR-1198-5p	10976	hairpin	undef
mmu_piR_033223	1	piRNA	mmu_piR_033223
mmu_piR_020804	2	piRNA	mmu_piR_020804
mmu_piR_022984	1	piRNA	mmu_piR_022984
mmu_piR_037842	1	piRNA	mmu_piR_037842
mmu-miR-201-5p	3	mature	mir-743
mmu-miR-124-3p	8	hairpin	mir-124
mmu_piR_009088	1	piRNA	mmu_piR_009088
mmu_piR_008441	1	piRNA	mmu_piR_008441
mmu_piR_006318	1	piRNA	mmu_piR_006318
mmu_piR_006780	1	piRNA	mmu_piR_006780
mmu_piR_021855	1	piRNA	mmu_piR_021855
mmu-miR-151-5p	722	hairpin	mir-28
mmu-miR-122b-5p	218	hairpin	undef
mmu-miR-8114	1	mature	undef
mmu_piR_004185	1	piRNA	mmu_piR_004185
mmu-miR-34b-3p	68	hairpin	mir-34
mmu_piR_013408	1	piRNA	mmu_piR_013408
mmu_piR_024924	1	piRNA	mmu_piR_024924
mmu_piR_038531	3	piRNA	mmu_piR_038531
mmu_piR_010811	1	piRNA	mmu_piR_010811
mmu_piR_034803	1	piRNA	mmu_piR_034803
mmu_piR_024234	9	piRNA	mmu_piR_024234
mmu-miR-183-5p	264	hairpin	mir-183
mmu_piR_002192	1	piRNA	mmu_piR_002192
mmu_piR_003172	1	piRNA	mmu_piR_003172
mmu_piR_002174	1	piRNA	mmu_piR_002174
mmu-miR-33-5p	4	mature	mir-33
mmu_piR_037820	1	piRNA	mmu_piR_037820
mmu_piR_002638	1	piRNA	mmu_piR_002638
mmu-miR-206-3p	3	hairpin	mir-1
mmu_piR_015466	1	piRNA	mmu_piR_015466
mmu_piR_020398	2	piRNA	mmu_piR_020398
mmu_piR_001529	19	piRNA	mmu_piR_001529
mmu_piR_016520	1	piRNA	mmu_piR_016520
mmu_piR_013309	1	piRNA	mmu_piR_013309
mmu_piR_003960	99	piRNA	mmu_piR_003960
mmu_piR_037144	2	piRNA	mmu_piR_037144
mmu-miR-490-5p	75	mature	mir-490
mmu_piR_014772	1	piRNA	mmu_piR_014772
mmu-miR-219a-2-3p	71	mature	mir-219
mmu_piR_026029	1	piRNA	mmu_piR_026029
mmu_piR_009498	1	piRNA	mmu_piR_009498
mmu-miR-290a-5p	36	hairpin	mir-290
mmu_piR_036969	1	piRNA	mmu_piR_036969
mmu-miR-150-5p	1409	mature	mir-150
mmu_piR_030022	1	piRNA	mmu_piR_030022
mmu_piR_006456	10	piRNA	mmu_piR_006456
mmu_piR_035342	1	piRNA	mmu_piR_035342
mmu_piR_006923	1	piRNA	mmu_piR_006923
mmu_piR_032497	1	piRNA	mmu_piR_032497
mmu_piR_034352	1	piRNA	mmu_piR_034352
mmu_piR_019616	1	piRNA	mmu_piR_019616
mmu_piR_009865	1	piRNA	mmu_piR_009865
mmu-miR-191-3p	1430	hairpin	mir-191
mmu_piR_020108	21	piRNA	mmu_piR_020108
mmu_piR_011063	2	piRNA	mmu_piR_011063
mmu-miR-34c-3p	1	mature	mir-34
mmu-miR-409-3p	73	mature	mir-154
mmu_piR_028779	31	piRNA	mmu_piR_028779
mmu_piR_001933	1	piRNA	mmu_piR_001933
mmu_piR_028090	1	piRNA	mmu_piR_028090
mmu_piR_025669	1	piRNA	mmu_piR_025669
mmu_piR_012412	94	piRNA	mmu_piR_012412
mmu_piR_005053	1	piRNA	mmu_piR_005053
mmu-miR-7119-3p	49	hairpin	undef
mmu_piR_037624	130	piRNA	mmu_piR_037624
mmu-miR-362-3p	55	mature	mir-362
mmu_piR_017257	1	piRNA	mmu_piR_017257
mmu-miR-8114	61	hairpin	undef
mmu-miR-181c-5p	61	hairpin	mir-181
mmu_piR_018323	6	piRNA	mmu_piR_018323
mmu-miR-7223-5p	1	hairpin	undef
mmu_piR_036754	1	piRNA	mmu_piR_036754
mmu_piR_024799	92	piRNA	mmu_piR_024799
mmu_piR_004901	2	piRNA	mmu_piR_004901
mmu_piR_015097	1	piRNA	mmu_piR_015097
mmu-miR-126a-5p	235	mature	mir-126
mmu-miR-465a-3p,mmu-miR-465b-3p,mmu-miR-465c-3p	4	mature	mir-465
mmu-miR-1947-5p	1	mature	undef
mmu_piR_034559	1	piRNA	mmu_piR_034559
mmu_piR_009734	1	piRNA	mmu_piR_009734
mmu_piR_015821	1	piRNA	mmu_piR_015821
mmu-miR-378b	491	hairpin	mir-378
mmu-let-7c-5p	6232	mature	let-7
mmu_piR_039809	1	piRNA	mmu_piR_039809
mmu_piR_025847	1	piRNA	mmu_piR_025847
mmu_piR_001593	1	piRNA	mmu_piR_001593
mmu_piR_013932	74	piRNA	mmu_piR_013932
mmu-miR-383-5p	1	mature	mir-383
mmu_piR_000695	2	piRNA	mmu_piR_000695
mmu_piR_019336	1	piRNA	mmu_piR_019336
mmu_piR_000819	2	piRNA	mmu_piR_000819
mmu_piR_015741	1	piRNA	mmu_piR_015741
mmu_piR_035477	1	piRNA	mmu_piR_035477
mmu_piR_019375	44	piRNA	mmu_piR_019375
mmu_piR_005717	1	piRNA	mmu_piR_005717
mmu_piR_005601	50	piRNA	mmu_piR_005601
mmu-miR-384-5p	1	hairpin	mir-384
mmu_piR_003346	1	piRNA	mmu_piR_003346
mmu_piR_026372	1	piRNA	mmu_piR_026372
mmu_piR_007379	1	piRNA	mmu_piR_007379
mmu_piR_005247	1	piRNA	mmu_piR_005247
mmu_piR_026173	1	piRNA	mmu_piR_026173
mmu_piR_019729	1	piRNA	mmu_piR_019729
mmu-miR-191-5p	8692	mature	mir-191
mmu-miR-142a-5p	291	mature	mir-142
mmu_piR_038994	1	piRNA	mmu_piR_038994
mmu-miR-378a-3p	8369	hairpin	mir-378
mmu-miR-503-3p	2	hairpin	mir-503
mmu_piR_024077	1	piRNA	mmu_piR_024077
mmu-miR-2139	34	hairpin	undef
mmu_piR_010287	25	piRNA	mmu_piR_010287
mmu_piR_039010	1	piRNA	mmu_piR_039010
mmu_piR_024495	1	piRNA	mmu_piR_024495
mmu_piR_039082	93	piRNA	mmu_piR_039082
mmu_piR_002323	13	piRNA	mmu_piR_002323
mmu_piR_000512	200	piRNA	mmu_piR_000512
mmu-miR-20a-5p	1	hairpin	mir-17
RF00051	92	precursor	mir-17 microRNA precursor family
RF00047	551	precursor	mir-2 microRNA precursor
RF02475	49	snoRNA	Small nucleolar RNA GlsR6
RF01370	3	Rfam other sncRNA	CRISPR RNA direct repeat element
RF01082	70	Rfam other sncRNA	Pseudoknot of upstream pseudoknot domain (UPD) of the 3'UTR
RF01328	2	Rfam other sncRNA	CRISPR RNA direct repeat element
RF00018	1	Rfam other sncRNA	CsrB/RsmB RNA family
RF00608	132	snoRNA	Small nucleolar RNA SNORD99
RF01118	146	rRNA	Pseudoknot of the domain G(G12) of 23S ribosomal RNA
RF02040	5	Rfam other sncRNA	HOXA transcript at the distal tip, conserved region 1
RF00496	154	Rfam other sncRNA	Coronavirus SL-III cis-acting replication element (CRE)
RF01768	126	Rfam other sncRNA	ribosomal frameshift site
RF00658	180	precursor	microRNA mir-21
RF02517	43	precursor	mir-1017 microRNA precursor family
RF01933	1	Rfam other sncRNA	Bithoraxoid conserved region 5
RF00854	96	precursor	microRNA mir-5
RF00067	2	snoRNA	Small nucleolar RNA SNORD15
RF01141	4	snoRNA	Small nucleolar RNA sR18
RF00752	174	precursor	microRNA mir-14
RF01833	210	Rfam other sncRNA	ribosomal frameshift site
RF00003	423	snRNA	U1 spliceosomal RNA
RF00375	196	Rfam other sncRNA	HIV primer binding site (PBS)
RF00342	3	snoRNA	Small nucleolar RNA Z40
RF00588	76	snoRNA	Small nucleolar RNA SNORD41
RF02263	7	Rfam other sncRNA	MAT2A 3'UTR stem loop D
RF00844	4	precursor	microRNA mir-67
RF00090	1	snoRNA	Small nucleolar RNA SNORA74
RF02182	116	Rfam other sncRNA	ST7 antisense RNA 2 conserved region 2
RF00441	7	snoRNA	Small nucleolar RNA Z242
RF00706	4	precursor	microRNA mir-263
RF00891	1	precursor	microRNA mir-671
RF01687	4	Rfam other sncRNA	Acido-Lenti-1 RNA
RF00431	70	snoRNA	Small nucleolar RNA SNORA55
RF00912	139	precursor	microRNA mir-877
RF00674	50	precursor	microRNA mir-187
RF00686	36	precursor	microRNA mir-338
RF00657	14	precursor	microRNA mir-184
RF00249	36	precursor	mir-46/mir-47/mir-281 microRNA precursor family
RF00593	452	snoRNA	Small nucleolar RNA U83B
RF00647	162	precursor	microRNA MIR164
RF00007	10	snRNA	U12 minor spliceosomal RNA
RF01852	5	tRNA	Selenocysteine transfer RNA
RF02246	47	Rfam other sncRNA	Six3os1 conserved region 1
RF01707	306	Rfam other sncRNA	JUMPstart RNA
RF02020	1	precursor	microRNA mir-25
RF00717	10	precursor	microRNA mir-315
RF00217	187	snoRNA	Small nucleolar RNA SNORD20
RF00180	175	Rfam other sncRNA	Renin stability regulatory element (REN-SRE)
RF01103	23	Rfam other sncRNA	Pseudoknot of upstream pseudoknot domain (UPD) of the 3'UTR
RF00568	1	snoRNA	Small nucleolar RNA SNORA26
RF02419	45	Rfam other sncRNA	Streptococcus sRNA Spd-sr37
RF02224	9	Rfam other sncRNA	Xanthomonadaceae sRNA sX5
RF01959	148	rRNA	Archaeal small subunit ribosomal RNA
RF00560	9	snoRNA	Small nucleolar RNA SNORA17
RF01351	55	Rfam other sncRNA	CRISPR RNA direct repeat element
RF01346	1	Rfam other sncRNA	CRISPR RNA direct repeat element
RF02416	2	Rfam other sncRNA	Turnip crinkle virus 3'UTR
RF01336	1	Rfam other sncRNA	CRISPR RNA direct repeat element
RF01130	2	snoRNA	Small nucleolar RNA sR46
RF00075	355	precursor	mir-166 microRNA precursor
RF02359	159	Rfam other sncRNA	Bacteriophage MS2 operator hairpin
RF00700	8728	precursor	microRNA mir-375
RF00783	346	precursor	microRNA mir-484
RF00181	1	snoRNA	Small nucleolar RNA SNORD113/SNORD114 family
RF00695	278	precursor	microRNA MIR398
RF00500	2	Rfam other sncRNA	Turnip crinkle virus (TCV) repressor of minus strand synthesis H5
RF02300	2	snoRNA	Tetrahymena snoRNA TtnuCD24
RF00227	1	Rfam other sncRNA	FIE3 (ftz instability element 3') element
RF00627	29	Rfam other sncRNA	Pseudomonas sRNA P15
RF01356	3	Rfam other sncRNA	CRISPR RNA direct repeat element
RF01129	1	snoRNA	Small nucleolar RNA sR44
RF00287	1	snoRNA	Small nucleolar RNA SNORD44
RF00518	1	Rfam other sncRNA	speF leader
RF01315	20	Rfam other sncRNA	CRISPR RNA direct repeat element
RF00679	2	precursor	microRNA mir-210
RF00175	1	Rfam other sncRNA	Human immunodeficiency virus type 1 dimerisation initiation site
RF00662	166	precursor	microRNA mir-132
RF00572	11	snoRNA	Small nucleolar RNA SNORD66
RF01611	1	snoRNA	Caenorhabditis snoRNA ceN108
RF00076	4089	precursor	mir-181 microRNA precursor
RF00364	5	precursor	mir-BART2 microRNA precursor family
RF00521	1	Rfam other sncRNA	SAM riboswitch (alpha-proteobacteria)
RF00276	1	snoRNA	Small nucleolar RNA SNORD52
RF01111	34	Rfam other sncRNA	Pseudoknot of upstream pseudoknot domain (UPD) of the 3'UTR
RF00530	1	snoRNA	Small nucleolar RNA Me28S-Cm2645
RF00409	72	snoRNA	Small nucleolar RNA SNORA7
RF00619	149	snRNA	U6atac minor spliceosomal RNA
RF00646	6	precursor	microRNA mir-204
RF00001	101	rRNA	5S ribosomal RNA
RF01837	2	Rfam other sncRNA	togavirus ribosomal frameshift element
RF01566	1	snoRNA	Dictyostelium snoRNA DdR16
RF01256	1	snoRNA	Small nucleolar RNA snR43
RF02194	2	Rfam other sncRNA	Bacterial antisense RNA HPnc0260
RF01704	17	Rfam other sncRNA	Downstream peptide RNA
RF02543	7708	rRNA	Eukaryotic large subunit ribosomal RNA
RF00382	62	Rfam other sncRNA	DnaX ribosomal frameshifting element
RF00649	3902	precursor	microRNA mir-128
RF01147	17	snoRNA	Small nucleolar RNA sR12
RF00724	1	precursor	microRNA mir-282
RF00195	2	Rfam other sncRNA	RsmY RNA family
RF00100	15	Rfam other sncRNA	7SK RNA
RF00245	676	precursor	mir-19 microRNA precursor family
RF01677	3	Rfam other sncRNA	Pseudomonas sRNA P35
RF00177	932	rRNA	Bacterial small subunit ribosomal RNA
RF01851	9	Rfam other sncRNA	Cyanobacteria transfer-messenger RNA
RF00711	1673	precursor	microRNA mir-449
RF00586	1	snoRNA	Small nucleolar RNA SNORA12
RF01561	1	snoRNA	Dictyostelium snoRNA DdR11
RF00004	139	snRNA	U2 spliceosomal RNA
RF01022	16	precursor	microRNA mir-611
RF01716	318	Rfam other sncRNA	PhotoRC-I RNA
RF00653	3	precursor	microRNA mir-22
RF01973	1	Rfam other sncRNA	H19 conserved region 2
RF02278	48	Rfam other sncRNA	Betaproteobacteria toxic small RNA
RF01849	3	Rfam other sncRNA	Alphaproteobacteria transfer-messenger RNA
RF02540	6	rRNA	Archaeal large subunit ribosomal RNA
RF02028	128	precursor	microRNA mir-1827
RF02119	1	Rfam other sncRNA	FTX transcript, XIST regulator conserved region 1
RF01885	3	Rfam other sncRNA	Heat shock gene hsromega conserved region 1
RF01140	3	snoRNA	Small nucleolar RNA sR20
RF01295	1286	snoRNA	Small Cajal body-specific RNA 7
RF00053	1767	precursor	mir-7 microRNA precursor
RF01352	66	Rfam other sncRNA	CRISPR RNA direct repeat element
RF01753	63	Rfam other sncRNA	psbNH RNA
RF00173	7	Rfam other sncRNA	Hairpin ribozyme
RF00216	1	Rfam other sncRNA	c-myc internal ribosome entry site (IRES)
RF01068	4	Rfam other sncRNA	mini-ykkC RNA motif
RF00144	5	precursor	mir-199 microRNA precursor
RF01306	676	snoRNA	Small nucleolar RNA sR52
RF00289	9	snoRNA	Small nucleolar RNA SNORD104
RF00282	1	snoRNA	Small nucleolar RNA SNORD48
RF01691	1	Rfam other sncRNA	Bacillus-plasmid RNA
RF00459	13	Rfam other sncRNA	Mason-Pfizer monkey virus packaging signal
RF00690	27	precursor	microRNA MIR408
RF00747	1	precursor	microRNA mir-283
RF00637	1122	precursor	microRNA mir-276
RF00032	132	Rfam other sncRNA	Histone 3' UTR stem-loop
RF00536	1	snoRNA	Small nucleolar RNA Me28S-Cm3227
RF00865	8	precursor	microRNA MIR169_5
RF00052	329	precursor	lin-4 microRNA precursor
RF01952	6	Rfam other sncRNA	SOX2 overlapping transcript exon 2
RF01668	2	Rfam other sncRNA	Pseudomonas sRNA P10
RF00257	80	precursor	mir-194 microRNA precursor family
RF01811	1	Rfam other sncRNA	Plasmid transferred anti-sense RNA
RF00381	26	Rfam other sncRNA	Antizyme RNA frameshifting stimulation element
RF01867	65	Rfam other sncRNA	caulobacter sRNA CC2171
RF02553	12	Rfam other sncRNA	Y RNA-like
RF00191	10	snoRNA	Small nucleolar RNA SNORA57
RF00671	4	precursor	microRNA mir-138
RF00392	3	snoRNA	Small nucleolar RNA SNORA5
RF01414	1	Rfam other sncRNA	Class I RNA
RF00644	23774	precursor	microRNA mir-27
RF00104	1126	precursor	mir-10 microRNA precursor family
RF01904	2	Rfam other sncRNA	HOTAIR conserved region 1
RF00251	1	precursor	mir-219 microRNA precursor family
RF00756	1	precursor	microRNA mir-299
RF01151	111	snoRNA	Small nucleolar RNA U82P
RF02344	1	Rfam other sncRNA	Alphaproteobacterial ar14
RF01960	185088	rRNA	Eukaryotic small subunit ribosomal RNA
RF00405	31	snoRNA	Small nucleolar RNA SNORA44
RF02491	1	snRNA	Giardia U1 spliceosomal RNA
RF01309	9	snoRNA	Small nucleolar RNA sR60
RF00223	3	Rfam other sncRNA	bip internal ribosome entry site (IRES)
RF01131	52	snoRNA	Small nucleolar RNA sR47
RF00017	162	Rfam other sncRNA	Metazoan signal recognition particle RNA
RF00377	1	snoRNA	Small nucleolar RNA U6-53/MBII-28
RF01232	65	snoRNA	Small nucleolar RNA R442
RF01506	10	snoRNA	A. fumigatus snoRNA Afu_294
RF01942	311	precursor	microRNA mir-1937
RF01320	69	Rfam other sncRNA	CRISPR RNA direct repeat element
RF00703	69	precursor	microRNA mir-139
RF00241	3930	precursor	mir-8/mir-141/mir-200 microRNA precursor family
RF00612	7	snoRNA	Small nucleolar RNA SNORD75
RF01121	15	snoRNA	Small nucleolar RNA sR38
RF01914	1	precursor	microRNA mir-932
RF00278	44	snoRNA	Small nucleolar RNA SNORD50
RF00065	1	snoRNA	Small nucleolar RNA snoR9
RF01379	17	Rfam other sncRNA	CRISPR RNA direct repeat element
RF01304	258	snoRNA	Small nucleolar RNA sR5
RF02153	1	Rfam other sncRNA	Neighbour of BRCA1 gene 2 converved region
RF00131	717	precursor	mir-30 microRNA precursor
RF00702	180	precursor	microRNA mir-182
RF02001	1	Rfam other sncRNA	Group II catalytic intron D1-D4-3
RF02509	33	Rfam other sncRNA	Pyrrolysine insertion sequence mtbB
RF00571	33	snoRNA	Small nucleolar RNA SNORD65
RF00489	18	Rfam other sncRNA	ctRNA
RF01114	42	Rfam other sncRNA	Pseudoknot of upstream pseudoknot domain (UPD) of the 3'UTR
RF00221	63	snoRNA	Small nucleolar RNA SNORD43
RF01322	29	Rfam other sncRNA	CRISPR RNA direct repeat element
RF00638	287	precursor	microRNA MIR159
RF00661	234	precursor	microRNA mir-31
RF01549	16	snoRNA	Trypanosomatid snoRNA TB8Cs2H1
RF00784	1277	precursor	microRNA mir-486
RF00254	1286	precursor	mir-16 microRNA precursor family
RF00037	1	Rfam other sncRNA	Iron response element I
RF01850	116	Rfam other sncRNA	Betaproteobacteria transfer-messenger RNA
RF01305	1	snoRNA	Small nucleolar RNA sR51
RF01546	1	snoRNA	Trypanosomatid snoRNA TB6Cs1H1
RF00237	1	precursor	mir-9/mir-79 microRNA precursor family
RF00016	63	snoRNA	Small nucleolar RNA SNORD14
RF02129	59	Rfam other sncRNA	GNAS antisense RNA 1 conserved region 3
RF01792	274	Rfam other sncRNA	ribosomal frameshift site
RF01675	1161	Rfam other sncRNA	Pseudomonas sRNA CrcZ
RF01152	45	snoRNA	Small nucleolar RNA sR1
RF00244	344	precursor	mir-26 microRNA precursor family
RF01762	129	Rfam other sncRNA	Whalefall-1 RNA
RF00193	2	Rfam other sncRNA	Citrus tristeza virus replication signal
RF01501	5	snoRNA	A. fimigatus snoRNA Afu_199
RF00005	60301	tRNA	tRNA
RF00691	478	precursor	microRNA mir-146
RF02066	1	Rfam other sncRNA	Salmonella enterica sRNA STnc320
RF01072	233	Rfam other sncRNA	Pseudoknot of upstream pseudoknot domain (UPD) of the 3'UTR
RF00668	1	precursor	microRNA mir-302
RF01836	1	Rfam other sncRNA	ribosomal frameshift site
RF00209	2	Rfam other sncRNA	Pestivirus internal ribosome entry site (IRES)
RF01339	13	Rfam other sncRNA	CRISPR RNA direct repeat element
RF01550	1	snoRNA	Trypanosomatid snoRNA TB8Cs3H1
RF00442	7	Rfam other sncRNA	ykkC-yxkD leader
RF00011	5	Rfam other sncRNA	Bacterial RNase P class B
RF00027	2748	precursor	let-7 microRNA precursor
RF00664	487	precursor	microRNA mir-223
RF00129	99	precursor	mir-103/107 microRNA precursor
RF01420	15	snoRNA	Small nucleolar RNA snoR113
RF01338	16	Rfam other sncRNA	CRISPR RNA direct repeat element
RF01519	51	Rfam other sncRNA	Caulobacter sRNA CC0196
RF00396	119	snoRNA	Small nucleolar RNA SNORA13
RF00871	4	precursor	microRNA mir-689
RF00838	113	precursor	microRNA mir-252
RF00648	1	precursor	microRNA MIR396
RF01099	6	Rfam other sncRNA	Pseudoknot of influenza A virus gene
RF01684	7143	Rfam other sncRNA	MALAT1-associated small cytoplasmic RNA/MEN beta RNA
RF00645	321	precursor	microRNA MIR169_2
RF02256	10	Rfam other sncRNA	Adaptive response 33 conserved region 2
RF00009	128	Rfam other sncRNA	Nuclear RNase P
RF00946	85	precursor	microRNA mir-1225
RF00373	35	Rfam other sncRNA	Archaeal RNase P
RF01972	3	Rfam other sncRNA	H19 conserved region 1
RF00729	1	precursor	microRNA mir-278
RF01273	2	snoRNA	Small nucleolar RNA sR34
RF01368	8	Rfam other sncRNA	CRISPR RNA direct repeat element
RF00385	104	Rfam other sncRNA	Infectious bronchitis virus D-RNA
RF00683	42	precursor	microRNA mir-143
RF02541	1775	rRNA	Bacterial large subunit ribosomal RNA
RF00091	1	snoRNA	Small nucleolar RNA SNORA62/SNORA6 family
RF01290	32	snoRNA	Small nucleolar RNA SNORD10
RF01125	183	snoRNA	Small nucleolar RNA sR4
RF02262	1	Rfam other sncRNA	MAT2A 3'UTR stem loop C
RF00103	97	precursor	mir-1 microRNA precursor family
RF00722	26729	precursor	microRNA mir-451
RF00406	55	snoRNA	Small nucleolar RNA SNORA42/SNORA80 family
RF00669	89	precursor	microRNA mir-96
RF00140	112	Rfam other sncRNA	Alpha operon ribosome binding site
RF02467	1	Rfam other sncRNA	Mycobacterium sRNA Ms_IGR-2
RF02203	5	Rfam other sncRNA	WT1 antisense RNA conserved region 1
RF01260	34	snoRNA	Small nucleolar RNA snR11
RF01003	1	precursor	microRNA mir-563
RF01424	61	snoRNA	small nucleolar RNA snoR118
RF01381	67	Rfam other sncRNA	HIV-1 stem-loop 3 Psi packaging signal
RF01046	152	Rfam other sncRNA	Wingless localisation element 3 (WLE3)
RF02448	12	Rfam other sncRNA	Streptococcus sRNA SpR20
RF01161	240	snoRNA	Small nucleolar RNA SNORD5
RF01895	220	precursor	microRNA mir-193
RF00728	68	precursor	microRNA mir-81
RF00128	9	Rfam other sncRNA	Glm Y RNA activator of glmS mRNA
RF01834	52	Rfam other sncRNA	ribosomal frameshift site
RF01138	18	snoRNA	Small nucleolar RNA sR23
RF01155	62	snoRNA	Small nucleolar RNA snoR101
RF01727	60	Rfam other sncRNA	SAM/SAH riboswitch
RF00253	73	precursor	mir-101 microRNA precursor family
RF00803	2	precursor	microRNA mir-425
RF00741	3182	precursor	microRNA mir-378
RF01272	73	snoRNA	Small nucleolar RNA snR86
RF00012	601	snoRNA	Small nucleolar RNA U3
RF01662	3	snoRNA	Caenorhabditis snoRNA ceN89
RF00446	1107	precursor	mir-133 microRNA precursor family
RF00772	1	precursor	microRNA mir-328
RF00428	12	snoRNA	Small nucleolar RNA SNORA38
RF00613	31	snoRNA	Small nucleolar RNA SNORD94
RF01134	14	snoRNA	Small nucleolar RNA sR30
RF00164	1	Rfam other sncRNA	Coronavirus 3' stem-loop II-like motif (s2m)
RF00651	1532	precursor	microRNA mir-221
RF01014	562	precursor	microRNA mir-1306
RF00110	8	Rfam other sncRNA	RybB RNA
RF00002	31429	rRNA	5.8S ribosomal RNA
RF00548	34	snRNA	U11 spliceosomal RNA
RF00643	80	precursor	microRNA MIR171_1
RF00358	1	snoRNA	Small nucleolar RNA Z101
RF00019	4431	Rfam other sncRNA	Y RNA
RF00066	1007	snRNA	U7 small nuclear RNA
RF01321	6	Rfam other sncRNA	CRISPR RNA direct repeat element
RF01860	2	snoRNA	A. fumigatus snoRNA Afu_455
RF01317	64	Rfam other sncRNA	CRISPR RNA direct repeat element
RF00006	1699	Rfam other sncRNA	Vault RNA
RF01163	1	snoRNA	Small nucleolar RNA snoR64a
RF01696	2	Rfam other sncRNA	Chlorobi-1 RNA
RF01354	1	Rfam other sncRNA	CRISPR RNA direct repeat element
RF00178	3963	precursor	mir-24 microRNA precursor family
RF01294	13	snoRNA	Small nucleolar RNA U89
RF00274	66	snoRNA	Small nucleolar RNA SNORD57
RF02147	53	Rfam other sncRNA	Maternally expressed 8 exon 3
RF00736	416	precursor	microRNA mir-320
RF00074	16303	precursor	mir-29 microRNA precursor
RF00130	68758	precursor	mir-192/215 microRNA precursor
RF00832	128	precursor	microRNA mir-71
RF00617	229	Rfam other sncRNA	flavivirus capsid hairpin cHP
RF01059	12	precursor	microRNA mir-598
RF01073	70	Rfam other sncRNA	Gag/pol translational readthrough site
RF00026	269	snRNA	U6 spliceosomal RNA
RF00667	105	precursor	microRNA mir-33
RF00105	1	snoRNA	Small nucleolar RNA SNORD115
RF02117	169	Rfam other sncRNA	FMR1 antisense RNA 1 conserved region 1
RF00023	159790	Rfam other sncRNA	transfer-messenger RNA
RF00039	39	Rfam other sncRNA	DicF RNA
RF01875	27	Rfam other sncRNA	Myocardial infarction associated transcript exon 5 conserved region 1
RF01307	1	snoRNA	Small nucleolar RNA sR55
RF00684	168	precursor	mir-122 microRNA precursor
RF01630	7	snoRNA	Nematode snoRNA ceN40
RF01419	5	Rfam other sncRNA	Antisense RNA which regulates isiA expression
RF01145	17	snoRNA	Small nucleolar RNA sR14
RF00606	227	snoRNA	Small nucleolar RNA SNORD93
RF00642	37446	precursor	microRNA mir-23
RF00663	27	precursor	microRNA mir-183
RF00096	1	snoRNA	U8 small nucleolar RNA
RF00469	225	Rfam other sncRNA	Hepatitis C stem-loop IV
RF02108	1	Rfam other sncRNA	Deleted in lymphocytic leukemia 2 conserved region 4
RF00169	1	Rfam other sncRNA	Bacterial small signal recognition particle RNA
RF01773	1	Rfam other sncRNA	Pseudomonas rpsL leader
RF00807	55	precursor	microRNA mir-314
RF00999	2	precursor	microRNA mir-924
RF00118	6	Rfam other sncRNA	rydB RNA
RF01107	70	Rfam other sncRNA	Pseudoknot of upstream pseudoknot domain (UPD) of the 3'UTR
RF01350	10	Rfam other sncRNA	CRISPR RNA direct repeat element
RF01195	1	snoRNA	Small nucleolar RNA snR52
RF01276	72	snoRNA	Small nucleolar RNA sR53
RF00239	50	precursor	mir-124 microRNA precursor family
RF01790	89	Rfam other sncRNA	ribosomal frameshift site
RF00778	5	precursor	microRNA MIR473
RF00523	47	Rfam other sncRNA	Prion pseudoknot
RF00701	224	precursor	microRNA mir-126
RF00464	6488	precursor	mir-92 microRNA precursor family
intron	7202883	intron	-
repeat	7483370	repeat	-
exon	2936622	exon	-
intergenic	3482917	intergenic	-
unmap	1152606	unmap	-

## Sheet: Table S1-positive control group
sRNA id	Count	Type	Description
mmu-miR-141-3p	173	hairpin	mir-8
mmu_piR_015997	1	piRNA	mmu_piR_015997
mmu_piR_007729	1	piRNA	mmu_piR_007729
mmu-miR-700-3p	9	hairpin	undef
mmu-miR-1843a-5p	20	mature	mir-1843
mmu-miR-378a-3p	852	mature	mir-378
mmu_piR_034172	1	piRNA	mmu_piR_034172
mmu_piR_032526	5	piRNA	mmu_piR_032526
mmu_piR_001651	1	piRNA	mmu_piR_001651
mmu_piR_022976	3	piRNA	mmu_piR_022976
mmu_piR_028305	3	piRNA	mmu_piR_028305
mmu_piR_038254	2	piRNA	mmu_piR_038254
mmu_piR_024027	1	piRNA	mmu_piR_024027
mmu_piR_004415	2	piRNA	mmu_piR_004415
mmu_piR_000180	7	piRNA	mmu_piR_000180
mmu-miR-465b-5p	1	hairpin	mir-465
mmu_piR_034509	1	piRNA	mmu_piR_034509
mmu_piR_000159	181	piRNA	mmu_piR_000159
mmu-miR-1930-5p	5	hairpin	undef
mmu_piR_014059	1	piRNA	mmu_piR_014059
mmu-miR-202-5p	1	hairpin	mir-202
mmu-miR-130a-3p	3	mature	mir-130
mmu-miR-3064-5p	1	hairpin	mir-3064
mmu_piR_028252	8	piRNA	mmu_piR_028252
mmu_piR_037258	1	piRNA	mmu_piR_037258
mmu-miR-17-5p	8	mature	mir-17
mmu-miR-28a-3p	45	mature	mir-28
mmu_piR_016652	1	piRNA	mmu_piR_016652
mmu-miR-485-5p	26	mature	mir-485
mmu_piR_000242	1	piRNA	mmu_piR_000242
mmu-miR-450b-5p	7	hairpin	mir-450
mmu-miR-215-5p	200	mature	mir-192
mmu-miR-7658-3p	2	hairpin	undef
mmu-miR-375-3p	1864	mature	mir-375
mmu-miR-3572-3p	1	hairpin	mir-3572
mmu_piR_012342	1	piRNA	mmu_piR_012342
mmu_piR_011678	1	piRNA	mmu_piR_011678
mmu_piR_034035	1	piRNA	mmu_piR_034035
mmu_piR_034485	39	piRNA	mmu_piR_034485
mmu-miR-379-5p	37	mature	mir-379
mmu-miR-9b-3p	28	mature	undef
mmu_piR_004222	4	piRNA	mmu_piR_004222
mmu-miR-199a-3p,mmu-miR-199b-3p	21	mature	mir-199
mmu-miR-23b-5p	2	mature	mir-23
mmu_piR_037358	1	piRNA	mmu_piR_037358
mmu-let-7f-5p	1430	mature	let-7
mmu_piR_012681	1	piRNA	mmu_piR_012681
mmu-miR-8107	1	hairpin	undef
mmu_piR_003244	1	piRNA	mmu_piR_003244
mmu_piR_000768	9	piRNA	mmu_piR_000768
mmu_piR_003163	3	piRNA	mmu_piR_003163
mmu_piR_018768	1	piRNA	mmu_piR_018768
mmu-miR-129-5p	2	hairpin	mir-129
mmu-miR-30e-3p	52	hairpin	mir-30
mmu_piR_022702	1	piRNA	mmu_piR_022702
mmu-miR-34a-5p	53	hairpin	mir-34
mmu_piR_013580	1	piRNA	mmu_piR_013580
mmu_piR_014422	2	piRNA	mmu_piR_014422
mmu_piR_025576	435	piRNA	mmu_piR_025576
mmu-miR-6944-3p	2	hairpin	undef
mmu_piR_034741	1	piRNA	mmu_piR_034741
mmu_piR_013616	2	piRNA	mmu_piR_013616
mmu_piR_002617	2	piRNA	mmu_piR_002617
mmu_piR_039114	77	piRNA	mmu_piR_039114
mmu_piR_037165	23	piRNA	mmu_piR_037165
mmu_piR_026680	1	piRNA	mmu_piR_026680
mmu_piR_027430	1	piRNA	mmu_piR_027430
mmu-miR-1191a	52	hairpin	undef
mmu_piR_017789	1	piRNA	mmu_piR_017789
mmu-miR-8107	4	mature	undef
mmu_piR_029178	1	piRNA	mmu_piR_029178
mmu-miR-3084-5p	4	hairpin	mir-3084
mmu_piR_000564	1	piRNA	mmu_piR_000564
mmu-miR-350-3p	3	mature	mir-350
mmu-miR-495-3p	1	hairpin	mir-329
mmu-miR-27a-3p	20390	hairpin	mir-27
mmu-miR-7044-5p	1	hairpin	undef
mmu_piR_038428	24	piRNA	mmu_piR_038428
mmu_piR_012829	119	piRNA	mmu_piR_012829
mmu-miR-376b-5p	3	hairpin	mir-368
mmu-miR-1905	1	hairpin	mir-1905
mmu-miR-1943-3p	1	mature	undef
mmu_piR_036307	1	piRNA	mmu_piR_036307
mmu-miR-3074-2-3p	5	hairpin	mir-3074
mmu_piR_002643	20	piRNA	mmu_piR_002643
mmu-miR-5113	5	hairpin	undef
mmu_piR_019980	1	piRNA	mmu_piR_019980
mmu_piR_037464	3	piRNA	mmu_piR_037464
mmu-miR-322-3p	6	hairpin	mir-322
mmu-miR-877-5p	22	hairpin	mir-877
mmu-miR-298-3p	3	mature	mir-298
mmu_piR_036445	2	piRNA	mmu_piR_036445
mmu-miR-210-3p	54	hairpin	mir-210
mmu_piR_039349	1	piRNA	mmu_piR_039349
mmu_piR_032034	2	piRNA	mmu_piR_032034
mmu-miR-1199-5p	3	hairpin	mir-1199
mmu-miR-542-5p	41	mature	mir-542
mmu_piR_026205	1	piRNA	mmu_piR_026205
mmu_piR_012621	1	piRNA	mmu_piR_012621
mmu-miR-429-3p	946	mature	mir-8
mmu-miR-10b-5p	372	mature	mir-10
mmu-miR-139-5p	466	hairpin	mir-139
mmu_piR_000133	1	piRNA	mmu_piR_000133
mmu_piR_016232	3	piRNA	mmu_piR_016232
mmu_piR_021777	2	piRNA	mmu_piR_021777
mmu-miR-204-3p	5	mature	mir-204
mmu_piR_024543	1	piRNA	mmu_piR_024543
mmu-miR-3962	2	hairpin	undef
mmu-miR-487b-3p	7	mature	mir-154
mmu-miR-598-3p	1	mature	mir-598
mmu_piR_015546	76	piRNA	mmu_piR_015546
mmu_piR_001551	6	piRNA	mmu_piR_001551
mmu-miR-484	877	mature	mir-484
mmu_piR_014355	1	piRNA	mmu_piR_014355
mmu_piR_030345	1	piRNA	mmu_piR_030345
mmu-miR-224-5p	41	mature	mir-224
mmu-miR-3057-5p	10	mature	undef
mmu-miR-181b-5p	7	hairpin	mir-181
mmu_piR_003461	3	piRNA	mmu_piR_003461
mmu_piR_032109	1	piRNA	mmu_piR_032109
mmu-miR-9-3p	5	mature	mir-9
mmu_piR_010896	1	piRNA	mmu_piR_010896
mmu_piR_024221	4	piRNA	mmu_piR_024221
mmu_piR_012005	1	piRNA	mmu_piR_012005
mmu_piR_037640	3	piRNA	mmu_piR_037640
mmu-miR-184-3p	44	mature	mir-184
mmu_piR_013035	1	piRNA	mmu_piR_013035
mmu-miR-7010-5p	4	hairpin	undef
mmu_piR_023562	1	piRNA	mmu_piR_023562
mmu-miR-470-5p	13	mature	mir-743
mmu_piR_029059	1	piRNA	mmu_piR_029059
mmu_piR_035294	1	piRNA	mmu_piR_035294
mmu-miR-25-3p	1836	hairpin	mir-25
mmu-miR-221-3p	4	mature	mir-221
mmu-miR-15a-3p	1	mature	mir-15
mmu_piR_039899	5	piRNA	mmu_piR_039899
mmu-miR-20a-5p	14	mature	mir-17
mmu_piR_018926	1	piRNA	mmu_piR_018926
mmu_piR_038285	1	piRNA	mmu_piR_038285
mmu-miR-466i-5p	83	hairpin	mir-467
mmu-miR-8116	11	mature	undef
mmu-miR-5114	4	hairpin	undef
mmu_piR_016784	1	piRNA	mmu_piR_016784
mmu-miR-29c-5p	5	hairpin	mir-29
mmu-miR-33-5p	25	hairpin	mir-33
mmu-miR-181a-1-3p	1	hairpin	mir-181
mmu-miR-8112	3	hairpin	undef
mmu-miR-7a-5p	395	hairpin	mir-7
mmu-miR-200c-3p	20	hairpin	mir-8
mmu-miR-205-5p	30	hairpin	mir-205
mmu-miR-1839-5p	81	mature	mir-1839
mmu_piR_037525	1	piRNA	mmu_piR_037525
mmu_piR_002034	1	piRNA	mmu_piR_002034
mmu_piR_031858	1	piRNA	mmu_piR_031858
mmu_piR_015712	1	piRNA	mmu_piR_015712
mmu_piR_037716	1	piRNA	mmu_piR_037716
mmu-miR-204-3p	1	hairpin	mir-204
mmu_piR_020516	1	piRNA	mmu_piR_020516
mmu-miR-376a-3p	16	hairpin	mir-368
mmu-miR-186-5p	3	hairpin	mir-186
mmu_piR_038303	1	piRNA	mmu_piR_038303
mmu-miR-150-3p	26	hairpin	mir-150
mmu_piR_018895	1	piRNA	mmu_piR_018895
mmu_piR_019765	1	piRNA	mmu_piR_019765
mmu-miR-10a-5p	361	hairpin	mir-10
mmu_piR_001533	1	piRNA	mmu_piR_001533
mmu-miR-434-3p	13	hairpin	mir-434
mmu_piR_028051	5	piRNA	mmu_piR_028051
mmu_piR_015127	2	piRNA	mmu_piR_015127
mmu_piR_007074	1	piRNA	mmu_piR_007074
mmu_piR_039759	1	piRNA	mmu_piR_039759
mmu_piR_029556	1	piRNA	mmu_piR_029556
mmu_piR_010356	1	piRNA	mmu_piR_010356
mmu_piR_019230	1	piRNA	mmu_piR_019230
mmu_piR_022369	1	piRNA	mmu_piR_022369
mmu-miR-421-3p	4	hairpin	mir-95
mmu_piR_021998	2	piRNA	mmu_piR_021998
mmu-miR-19b-3p	161	hairpin	mir-19
mmu-miR-744-3p	3	mature	mir-744
mmu_piR_007794	1	piRNA	mmu_piR_007794
mmu-miR-449a-5p	37	mature	mir-449
mmu-miR-92a-3p	11666	hairpin	mir-25
mmu_piR_035344	2	piRNA	mmu_piR_035344
mmu_piR_000935	3737	piRNA	mmu_piR_000935
mmu-miR-378b	63	mature	mir-378
mmu-miR-139-3p	4	mature	mir-139
mmu_piR_015045	1	piRNA	mmu_piR_015045
mmu-miR-433-3p	1	mature	mir-433
mmu_piR_003947	1	piRNA	mmu_piR_003947
mmu-miR-219a-2-3p	3	hairpin	mir-219
mmu-let-7f-2-3p	102	hairpin	let-7
mmu-miR-181a-5p	2798	hairpin	mir-181
mmu_piR_015900	1	piRNA	mmu_piR_015900
mmu-miR-215-3p	33	mature	mir-192
mmu-miR-34a-5p	606	mature	mir-34
mmu_piR_032579	1	piRNA	mmu_piR_032579
mmu-miR-1a-3p	237	mature	mir-1
mmu-miR-669b-5p	13	hairpin	mir-467
mmu-miR-6967-5p	2	hairpin	mir-6967
mmu-miR-7667-5p	1	mature	undef
mmu_piR_009285	2	piRNA	mmu_piR_009285
mmu_piR_017508	69	piRNA	mmu_piR_017508
mmu-miR-9-3p	1	hairpin	mir-9
mmu_piR_014142	3	piRNA	mmu_piR_014142
mmu-miR-3077-3p	2	hairpin	undef
mmu-miR-411-5p	17	hairpin	mir-379
mmu-miR-93-5p	411	mature	mir-17
mmu_piR_034535	1	piRNA	mmu_piR_034535
mmu_piR_026716	3	piRNA	mmu_piR_026716
mmu-miR-190b-5p	7	hairpin	mir-190
mmu-miR-133a-3p	96	hairpin	mir-133
mmu_piR_030396	15	piRNA	mmu_piR_030396
mmu_piR_038400	1	piRNA	mmu_piR_038400
mmu-miR-486b-3p	37	hairpin	mir-486
mmu-miR-339-3p	6	mature	mir-339
mmu-miR-151-3p	100	mature	mir-28
mmu-miR-574-5p	206	hairpin	mir-574
mmu_piR_020876	1	piRNA	mmu_piR_020876
mmu_piR_032016	1	piRNA	mmu_piR_032016
mmu-miR-433-3p	8	hairpin	mir-433
mmu-miR-675-3p	1	hairpin	mir-675
mmu-miR-5622-3p	7	hairpin	undef
mmu_piR_014609	1	piRNA	mmu_piR_014609
mmu_piR_029953	1	piRNA	mmu_piR_029953
mmu_piR_004473	19	piRNA	mmu_piR_004473
mmu-miR-7682-3p	1	hairpin	undef
mmu-miR-7069-3p	1	hairpin	undef
mmu_piR_016337	2	piRNA	mmu_piR_016337
mmu_piR_004658	133	piRNA	mmu_piR_004658
mmu_piR_037234	3	piRNA	mmu_piR_037234
mmu_piR_013269	2	piRNA	mmu_piR_013269
mmu_piR_030307	1	piRNA	mmu_piR_030307
mmu_piR_039189	1	piRNA	mmu_piR_039189
mmu-miR-380-3p	9	hairpin	mir-379
mmu-miR-664-3p	11	hairpin	mir-664
mmu_piR_015892	1	piRNA	mmu_piR_015892
mmu-miR-6922-3p	1	hairpin	undef
mmu-miR-6964-3p	1	hairpin	undef
mmu-miR-183-5p	13	mature	mir-183
mmu_piR_038509	1	piRNA	mmu_piR_038509
mmu-miR-29a-3p	1668	hairpin	mir-29
mmu-miR-5099	2	mature	undef
mmu-miR-1247-5p	2	mature	mir-1247
mmu_piR_005323	1	piRNA	mmu_piR_005323
mmu-miR-423-3p	1429	hairpin	mir-423
mmu_piR_033569	1	piRNA	mmu_piR_033569
mmu-miR-710	1	hairpin	undef
mmu_piR_033646	28	piRNA	mmu_piR_033646
mmu_piR_014919	142	piRNA	mmu_piR_014919
mmu-miR-5129-5p	1	hairpin	undef
mmu_piR_013925	1	piRNA	mmu_piR_013925
mmu_piR_007432	4	piRNA	mmu_piR_007432
mmu-miR-16-5p	2116	hairpin	mir-15
mmu-miR-7b-5p	159	hairpin	mir-7
mmu-miR-301a-3p	12	mature	mir-130
mmu-miR-486a-3p	60	mature	mir-486
mmu-miR-5114	2	mature	undef
mmu-miR-18b-5p	1	hairpin	mir-17
mmu_piR_024533	1	piRNA	mmu_piR_024533
mmu-miR-297a-5p	49	mature	mir-297
mmu_piR_000414	1	piRNA	mmu_piR_000414
mmu-miR-7018-3p	3	hairpin	undef
mmu_piR_009999	1	piRNA	mmu_piR_009999
mmu-let-7i-5p	11601	hairpin	let-7
mmu-miR-142a-3p	12	hairpin	mir-142
mmu_piR_014892	1	piRNA	mmu_piR_014892
mmu-miR-3960	3	hairpin	mir-3960
mmu_piR_014623	2	piRNA	mmu_piR_014623
mmu_piR_016964	1	piRNA	mmu_piR_016964
mmu-miR-425-5p	61	mature	mir-425
mmu-miR-127-3p	317	mature	mir-127
mmu-miR-486a-5p,mmu-miR-486b-5p	3074	hairpin	mir-486
mmu_piR_022408	1	piRNA	mmu_piR_022408
mmu-miR-295-5p	3	hairpin	mir-290
mmu_piR_031931	1	piRNA	mmu_piR_031931
mmu-miR-187-5p	3	hairpin	mir-187
mmu-miR-6941-3p	6	hairpin	undef
mmu_piR_020682	1	piRNA	mmu_piR_020682
mmu_piR_009884	1	piRNA	mmu_piR_009884
mmu_piR_004940	1	piRNA	mmu_piR_004940
mmu_piR_019200	2	piRNA	mmu_piR_019200
mmu-miR-676-3p	129	hairpin	mir-676
mmu_piR_000858	1	piRNA	mmu_piR_000858
mmu_piR_017337	1	piRNA	mmu_piR_017337
mmu_piR_018586	1	piRNA	mmu_piR_018586
mmu-miR-193b-5p	2	hairpin	mir-193
mmu-miR-673-3p	3	hairpin	mir-673
mmu_piR_029031	1	piRNA	mmu_piR_029031
mmu-miR-224-5p	22	hairpin	mir-224
mmu_piR_001821	1	piRNA	mmu_piR_001821
mmu_piR_015255	1	piRNA	mmu_piR_015255
mmu_piR_011225	5	piRNA	mmu_piR_011225
mmu-miR-369-5p	83	hairpin	mir-154
mmu_piR_039960	1	piRNA	mmu_piR_039960
mmu-miR-7058-5p	1	mature	undef
mmu-miR-484	1915	hairpin	mir-484
mmu-let-7d-3p	250	mature	let-7
mmu-miR-7232-3p	1	mature	undef
mmu_piR_000735	1	piRNA	mmu_piR_000735
mmu-miR-30b-5p	1072	mature	mir-30
mmu-miR-28a-5p	1	mature	mir-28
mmu-miR-675-3p	20	mature	mir-675
mmu-miR-141-3p	37	mature	mir-8
mmu_piR_025279	1	piRNA	mmu_piR_025279
mmu_piR_034411	9	piRNA	mmu_piR_034411
mmu_piR_020120	55	piRNA	mmu_piR_020120
mmu-miR-139-3p	26	hairpin	mir-139
mmu_piR_001306	1	piRNA	mmu_piR_001306
mmu_piR_002657	1	piRNA	mmu_piR_002657
mmu-miR-16-2-3p	6	hairpin	mir-15
mmu_piR_033212	2	piRNA	mmu_piR_033212
mmu_piR_028533	3	piRNA	mmu_piR_028533
mmu-miR-18b-5p	2	mature	mir-17
mmu_piR_012500	4	piRNA	mmu_piR_012500
mmu-miR-3071-5p	5	hairpin	undef
mmu_piR_037320	13	piRNA	mmu_piR_037320
mmu_piR_039887	1	piRNA	mmu_piR_039887
mmu_piR_012023	1	piRNA	mmu_piR_012023
mmu-miR-21a-5p	9804	mature	mir-21
mmu_piR_002667	1	piRNA	mmu_piR_002667
mmu_piR_028464	1	piRNA	mmu_piR_028464
mmu-let-7d-5p	421	mature	let-7
mmu-miR-23b-3p	9	mature	mir-23
mmu_piR_009325	1	piRNA	mmu_piR_009325
mmu_piR_018222	1	piRNA	mmu_piR_018222
mmu_piR_006982	3	piRNA	mmu_piR_006982
mmu_piR_034454	3	piRNA	mmu_piR_034454
mmu-miR-98-5p	94	mature	let-7
mmu_piR_005916	1	piRNA	mmu_piR_005916
mmu-miR-24-2-5p	37	mature	mir-24
mmu-miR-1249-5p	1	hairpin	mir-1249
mmu-miR-411-5p	132	mature	mir-379
mmu_piR_028204	1	piRNA	mmu_piR_028204
mmu-miR-702-3p	1	hairpin	mir-702
mmu-miR-7024-5p	2	hairpin	undef
mmu_piR_016156	1	piRNA	mmu_piR_016156
mmu-miR-7117-3p	13	hairpin	undef
mmu_piR_009108	4	piRNA	mmu_piR_009108
mmu-miR-297a-5p	9	hairpin	mir-297
mmu-miR-6546-3p	7	mature	undef
mmu_piR_007313	1	piRNA	mmu_piR_007313
mmu-miR-96-5p	17	hairpin	mir-96
mmu-miR-741-5p	1	hairpin	undef
mmu_piR_017405	14	piRNA	mmu_piR_017405
mmu_piR_031465	1	piRNA	mmu_piR_031465
mmu_piR_020639	2	piRNA	mmu_piR_020639
mmu-miR-193a-5p	1	hairpin	mir-193
mmu-miR-124-3p	3	mature	mir-124
mmu-miR-322-5p	224	hairpin	mir-322
mmu-miR-342-3p	432	hairpin	mir-342
mmu-miR-7087-3p	1	hairpin	undef
mmu-miR-6962-5p	1	hairpin	undef
mmu_piR_011141	1	piRNA	mmu_piR_011141
mmu-miR-106b-5p	3	mature	mir-17
mmu-miR-219a-5p	7	hairpin	mir-219
mmu_piR_039163	5	piRNA	mmu_piR_039163
mmu_piR_032201	2	piRNA	mmu_piR_032201
mmu-miR-181d-3p	63	hairpin	mir-181
mmu_piR_008244	1	piRNA	mmu_piR_008244
mmu_piR_038869	2	piRNA	mmu_piR_038869
mmu_piR_035066	1	piRNA	mmu_piR_035066
mmu_piR_003416	1	piRNA	mmu_piR_003416
mmu_piR_035885	1	piRNA	mmu_piR_035885
mmu_piR_036060	1	piRNA	mmu_piR_036060
mmu-miR-1193-3p	1	mature	mir-1193
mmu-miR-101a-3p	1	mature	mir-101
mmu-miR-361-5p	31	hairpin	mir-361
mmu-miR-193a-3p	1	mature	mir-193
mmu_piR_026351	1	piRNA	mmu_piR_026351
mmu-miR-466i-5p	13	mature	mir-467
mmu_piR_027178	15	piRNA	mmu_piR_027178
mmu-miR-92b-3p	105	mature	mir-25
mmu_piR_012922	1	piRNA	mmu_piR_012922
mmu-miR-24-2-5p	2	hairpin	mir-24
mmu-miR-203b-3p	1	mature	undef
mmu_piR_015354	1	piRNA	mmu_piR_015354
mmu_piR_012301	1	piRNA	mmu_piR_012301
mmu-miR-8097	1	hairpin	undef
mmu_piR_012562	15	piRNA	mmu_piR_012562
mmu_piR_039018	1	piRNA	mmu_piR_039018
mmu-miR-20b-5p	2	mature	mir-17
mmu_piR_002333	2	piRNA	mmu_piR_002333
mmu-miR-467d-5p	12	hairpin	mir-467
mmu-miR-410-3p	4	mature	mir-154
mmu-let-7i-5p	3079	mature	let-7
mmu-miR-142a-5p	6	hairpin	mir-142
mmu-miR-27a-3p	2190	mature	mir-27
mmu-miR-3470a	1	hairpin	mir-3470
mmu_piR_036435	2	piRNA	mmu_piR_036435
mmu_piR_025431	1	piRNA	mmu_piR_025431
mmu-miR-21a-3p	1	mature	mir-21
mmu_piR_018395	1	piRNA	mmu_piR_018395
mmu_piR_003040	1	piRNA	mmu_piR_003040
mmu_piR_025550	1	piRNA	mmu_piR_025550
mmu-miR-181c-5p	137	mature	mir-181
mmu_piR_004114	1	piRNA	mmu_piR_004114
mmu_piR_021357	1	piRNA	mmu_piR_021357
mmu_piR_016752	2	piRNA	mmu_piR_016752
mmu_piR_014885	1	piRNA	mmu_piR_014885
mmu_piR_038548	1	piRNA	mmu_piR_038548
mmu-miR-22-3p	12856	mature	mir-22
mmu_piR_010309	4	piRNA	mmu_piR_010309
mmu-miR-497a-5p	27	hairpin	mir-497
mmu-miR-6970-5p	1	hairpin	undef
mmu_piR_038667	1	piRNA	mmu_piR_038667
mmu-miR-669e-5p	6	hairpin	mir-467
mmu-miR-344d-3p	1	hairpin	mir-344
mmu_piR_038940	1	piRNA	mmu_piR_038940
mmu-miR-320-3p	454	hairpin	mir-320
mmu-miR-29c-3p	137	hairpin	mir-29
mmu_piR_001946	1	piRNA	mmu_piR_001946
mmu_piR_018464	1	piRNA	mmu_piR_018464
mmu_piR_004374	3	piRNA	mmu_piR_004374
mmu-miR-184-3p	157	hairpin	mir-184
mmu_piR_039788	1	piRNA	mmu_piR_039788
mmu_piR_024749	7	piRNA	mmu_piR_024749
mmu-miR-212-3p	4	mature	mir-132
mmu-miR-451a	26468	mature	mir-451
mmu-miR-199a-3p,mmu-miR-199b-3p	1398	hairpin	mir-199
mmu-miR-3547-5p	1	hairpin	mir-3547
mmu_piR_009170	1	piRNA	mmu_piR_009170
mmu_piR_018906	2	piRNA	mmu_piR_018906
mmu_piR_034919	1	piRNA	mmu_piR_034919
mmu-miR-1839-5p	361	hairpin	mir-1839
mmu_piR_000618	5	piRNA	mmu_piR_000618
mmu-miR-3473d	1	hairpin	mir-3473
mmu-miR-3062-5p	2	hairpin	undef
mmu_piR_017858	1	piRNA	mmu_piR_017858
mmu-miR-5106	10	hairpin	undef
mmu_piR_005673	5	piRNA	mmu_piR_005673
mmu-miR-206-3p	570	mature	mir-1
mmu_piR_012508	1	piRNA	mmu_piR_012508
mmu_piR_025977	4	piRNA	mmu_piR_025977
mmu_piR_026529	4	piRNA	mmu_piR_026529
mmu-miR-221-3p	344	hairpin	mir-221
mmu_piR_030493	1	piRNA	mmu_piR_030493
mmu_piR_029138	22	piRNA	mmu_piR_029138
mmu_piR_029357	2	piRNA	mmu_piR_029357
mmu-miR-126a-5p	12	hairpin	mir-126
mmu-miR-181d-5p	72	hairpin	mir-181
mmu-miR-128-3p	936	hairpin	mir-128
mmu_piR_017208	1	piRNA	mmu_piR_017208
mmu-miR-346-5p	4	mature	mir-346
mmu-let-7d-3p	478	hairpin	let-7
mmu-miR-7067-5p	3	hairpin	undef
mmu_piR_012031	1	piRNA	mmu_piR_012031
mmu-miR-106b-5p	1550	hairpin	mir-17
mmu-miR-5099	3	hairpin	undef
mmu-miR-188-5p	3	mature	mir-188
mmu-miR-182-5p	1	mature	mir-182
mmu_piR_038210	1	piRNA	mmu_piR_038210
mmu-miR-152-3p	21	hairpin	mir-148
mmu_piR_031471	6	piRNA	mmu_piR_031471
mmu-miR-21a-3p	1	hairpin	mir-21
mmu-miR-467e-5p	3	hairpin	mir-467
mmu_piR_031891	1	piRNA	mmu_piR_031891
mmu_piR_031225	1	piRNA	mmu_piR_031225
mmu-miR-543-5p	4	hairpin	mir-329
mmu-miR-871-5p	5	mature	mir-743
mmu-miR-449a-5p	6	hairpin	mir-449
mmu_piR_027739	11	piRNA	mmu_piR_027739
mmu_piR_036829	1	piRNA	mmu_piR_036829
mmu_piR_038761	48	piRNA	mmu_piR_038761
mmu_piR_014703	2	piRNA	mmu_piR_014703
mmu-miR-338-5p	2	mature	mir-338
mmu-miR-15a-3p	1	hairpin	mir-15
mmu-miR-5119	6	hairpin	undef
mmu-miR-154-5p	9	hairpin	mir-154
mmu_piR_020098	1	piRNA	mmu_piR_020098
mmu-miR-30a-3p	13	mature	mir-30
mmu-miR-466h-3p	3	hairpin	mir-467
mmu-miR-154-5p	31	mature	mir-154
mmu_piR_001219	1	piRNA	mmu_piR_001219
mmu-miR-7a-5p	308	mature	mir-7
mmu-miR-877-3p	11	mature	mir-877
mmu_piR_000982	1	piRNA	mmu_piR_000982
mmu-miR-128-2-5p	2	hairpin	mir-128
mmu-miR-181a-2-3p	1	mature	mir-181
mmu-miR-300-3p	1	mature	mir-154
mmu_piR_010533	3	piRNA	mmu_piR_010533
mmu-miR-496a-3p	2	hairpin	mir-154
mmu_piR_017355	1	piRNA	mmu_piR_017355
mmu_piR_001530	1	piRNA	mmu_piR_001530
mmu_piR_006857	2	piRNA	mmu_piR_006857
mmu-miR-99a-5p	2938	mature	mir-10
mmu_piR_021304	1	piRNA	mmu_piR_021304
mmu_piR_006416	1	piRNA	mmu_piR_006416
mmu_piR_012095	1	piRNA	mmu_piR_012095
mmu-miR-7687-3p	4	hairpin	undef
mmu-miR-351-5p	7	hairpin	mir-351
mmu_piR_001291	1	piRNA	mmu_piR_001291
mmu_piR_035214	4	piRNA	mmu_piR_035214
mmu_piR_036160	1	piRNA	mmu_piR_036160
mmu_piR_022652	8	piRNA	mmu_piR_022652
mmu-miR-1249-3p	1	mature	mir-1249
mmu_piR_000209	11	piRNA	mmu_piR_000209
mmu-miR-382-5p	29	hairpin	mir-154
mmu-miR-375-3p	435	hairpin	mir-375
mmu-miR-30e-5p	1	hairpin	mir-30
mmu_piR_000689	1	piRNA	mmu_piR_000689
mmu_piR_024575	1	piRNA	mmu_piR_024575
mmu_piR_003025	1	piRNA	mmu_piR_003025
mmu-miR-7045-5p	62	hairpin	undef
mmu-miR-6386	1	hairpin	undef
mmu_piR_032516	1	piRNA	mmu_piR_032516
mmu-miR-150-5p	157	hairpin	mir-150
mmu_piR_010469	1	piRNA	mmu_piR_010469
mmu_piR_006511	2	piRNA	mmu_piR_006511
mmu_piR_033780	1	piRNA	mmu_piR_033780
mmu-miR-3101-5p	3	hairpin	undef
mmu-miR-1b-5p	1	mature	mir-1
mmu_piR_008677	1	piRNA	mmu_piR_008677
mmu-miR-6943-3p	1	mature	undef
mmu_piR_013623	1	piRNA	mmu_piR_013623
mmu_piR_024653	3	piRNA	mmu_piR_024653
mmu-miR-7047-5p	1	hairpin	undef
mmu_piR_033077	5	piRNA	mmu_piR_033077
mmu-miR-714	7	hairpin	undef
mmu-miR-1934-5p	2	hairpin	undef
mmu-miR-330-3p	3	hairpin	mir-330
mmu-miR-450a-5p	8	mature	mir-450
mmu_piR_009721	2	piRNA	mmu_piR_009721
mmu_piR_019998	9	piRNA	mmu_piR_019998
mmu-miR-574-5p	3	mature	mir-574
mmu-miR-1983	51	hairpin	undef
mmu-miR-145a-3p	7	mature	mir-145
mmu-miR-103-3p	9	hairpin	mir-103
mmu-miR-532-3p	2	hairpin	mir-188
mmu_piR_036831	1	piRNA	mmu_piR_036831
mmu-miR-434-3p	12	mature	mir-434
mmu_piR_010474	1	piRNA	mmu_piR_010474
mmu-miR-7043-3p	1	hairpin	undef
mmu_piR_000705	1	piRNA	mmu_piR_000705
mmu-let-7k	2714	hairpin	undef
mmu_piR_005874	1	piRNA	mmu_piR_005874
mmu-miR-218-5p	29	hairpin	mir-218
mmu_piR_004161	1	piRNA	mmu_piR_004161
mmu-miR-193a-3p	5	hairpin	mir-193
mmu_piR_024115	1	piRNA	mmu_piR_024115
mmu-miR-204-5p	64	hairpin	mir-204
mmu-miR-802-5p	2	hairpin	mir-802
mmu_piR_000949	2	piRNA	mmu_piR_000949
mmu_piR_022607	1	piRNA	mmu_piR_022607
mmu_piR_022598	1	piRNA	mmu_piR_022598
mmu-miR-1843b-5p	48	hairpin	mir-1843
mmu_piR_007214	1	piRNA	mmu_piR_007214
mmu_piR_034080	1	piRNA	mmu_piR_034080
mmu-miR-182-3p	7	mature	mir-182
mmu-miR-1247-3p	1	hairpin	mir-1247
mmu_piR_032183	1	piRNA	mmu_piR_032183
mmu-miR-345-5p	2	hairpin	mir-345
mmu_piR_039958	1	piRNA	mmu_piR_039958
mmu_piR_035967	2	piRNA	mmu_piR_035967
mmu_piR_017518	1	piRNA	mmu_piR_017518
mmu_piR_039386	2	piRNA	mmu_piR_039386
mmu-let-7f-5p	777	hairpin	let-7
mmu_piR_004957	1	piRNA	mmu_piR_004957
mmu-miR-22-3p	5853	hairpin	mir-22
mmu-miR-26b-5p	78	hairpin	mir-26
mmu-miR-6957-3p	1	hairpin	undef
mmu-miR-3084-5p	6	mature	mir-3084
mmu_piR_029014	1	piRNA	mmu_piR_029014
mmu_piR_017525	1	piRNA	mmu_piR_017525
mmu_piR_012869	1	piRNA	mmu_piR_012869
mmu-miR-135b-5p	1	mature	mir-135
mmu_piR_017341	62	piRNA	mmu_piR_017341
mmu-miR-451a	73348	hairpin	mir-451
mmu_piR_025021	1	piRNA	mmu_piR_025021
mmu-miR-194-5p	2328	hairpin	mir-194
mmu_piR_039026	1	piRNA	mmu_piR_039026
mmu_piR_030801	3	piRNA	mmu_piR_030801
mmu_piR_036671	2	piRNA	mmu_piR_036671
mmu-miR-6970-3p	2	hairpin	undef
mmu-miR-323-3p	5	hairpin	mir-154
mmu-miR-30d-5p	329	hairpin	mir-30
mmu-miR-140-5p	91	mature	mir-140
mmu_piR_026210	1	piRNA	mmu_piR_026210
mmu-miR-7036b-3p	1	hairpin	undef
mmu-miR-30b-5p	18	hairpin	mir-30
mmu_piR_001748	1	piRNA	mmu_piR_001748
mmu-miR-3074-2-3p	34	mature	mir-3074
mmu-miR-363-3p	5	hairpin	mir-363
mmu-miR-7a-1-3p	20	hairpin	mir-7
mmu_piR_012871	5	piRNA	mmu_piR_012871
mmu-miR-1843a-5p	27	hairpin	mir-1843
mmu-miR-3084-3p	37	hairpin	mir-3084
mmu-miR-196b-5p	106	hairpin	mir-196
mmu_piR_037929	1	piRNA	mmu_piR_037929
mmu-miR-425-3p	97	hairpin	mir-425
mmu_piR_013797	1	piRNA	mmu_piR_013797
mmu-miR-93-3p	2	hairpin	mir-17
mmu-miR-486a-3p	15	hairpin	mir-486
mmu_piR_036551	4	piRNA	mmu_piR_036551
mmu_piR_036381	1	piRNA	mmu_piR_036381
mmu-miR-200b-3p	4	mature	mir-8
mmu-miR-149-5p	367	hairpin	mir-149
mmu_piR_032717	1	piRNA	mmu_piR_032717
mmu-miR-1843a-3p	4	hairpin	mir-1843
mmu-miR-741-3p	1	hairpin	undef
mmu_piR_014541	1	piRNA	mmu_piR_014541
mmu_piR_012713	1	piRNA	mmu_piR_012713
mmu-miR-1962	1	hairpin	undef
mmu_piR_038651	3	piRNA	mmu_piR_038651
mmu_piR_038430	9	piRNA	mmu_piR_038430
mmu-miR-7065-5p	2	hairpin	undef
mmu-miR-423-5p	26	mature	mir-423
mmu-miR-1191a	10	mature	undef
mmu_piR_011535	2	piRNA	mmu_piR_011535
mmu_piR_006854	1	piRNA	mmu_piR_006854
mmu-miR-30d-5p	995	mature	mir-30
mmu_piR_039334	2	piRNA	mmu_piR_039334
mmu-miR-6546-3p	1	hairpin	undef
mmu_piR_016650	1	piRNA	mmu_piR_016650
mmu_piR_003342	1	piRNA	mmu_piR_003342
mmu-miR-320-3p	139	mature	mir-320
mmu-miR-223-3p	415	mature	mir-223
mmu-miR-140-5p	79	hairpin	mir-140
mmu-miR-3060-3p	46	hairpin	undef
mmu-miR-34b-3p	4	mature	mir-34
mmu_piR_011724	3	piRNA	mmu_piR_011724
mmu-miR-130b-3p	8	hairpin	mir-130
mmu-miR-7117-5p	5	hairpin	undef
mmu-miR-28a-3p	52	hairpin	mir-28
mmu-miR-301a-3p	17	hairpin	mir-130
mmu_piR_031282	1	piRNA	mmu_piR_031282
mmu_piR_038801	1	piRNA	mmu_piR_038801
mmu_piR_013682	536	piRNA	mmu_piR_013682
mmu-let-7a-1-3p,mmu-let-7c-2-3p	18	mature	let-7
mmu-miR-3113-3p	1	hairpin	undef
mmu-miR-196b-5p	894	mature	mir-196
mmu-miR-7065-3p	3	hairpin	undef
mmu-miR-192-3p	1	mature	mir-192
mmu-miR-339-5p	2	hairpin	mir-339
mmu-miR-30e-5p	4	mature	mir-30
mmu-miR-187-3p	43	mature	mir-187
mmu-miR-1198-3p	15	hairpin	undef
mmu-miR-511-3p	1	hairpin	mir-506
mmu-miR-744-3p	4	hairpin	mir-744
mmu-miR-466g	1	mature	mir-467
mmu-let-7e-3p	21	mature	let-7
mmu-miR-98-5p	107	hairpin	let-7
mmu-miR-10a-3p	10	hairpin	mir-10
mmu-miR-7024-5p	1	mature	undef
mmu-miR-421-5p	1	hairpin	mir-95
mmu_piR_038487	1	piRNA	mmu_piR_038487
mmu_piR_003394	1	piRNA	mmu_piR_003394
mmu_piR_007889	1	piRNA	mmu_piR_007889
mmu-miR-125a-5p	2	mature	mir-10
mmu-miR-130b-5p	3	mature	mir-130
mmu_piR_020770	1	piRNA	mmu_piR_020770
mmu-miR-296-5p	11	hairpin	mir-296
mmu_piR_037832	1	piRNA	mmu_piR_037832
mmu-miR-211-5p	1	hairpin	mir-204
mmu-miR-1839-3p	19	hairpin	mir-1839
mmu_piR_009584	4	piRNA	mmu_piR_009584
mmu-miR-874-3p	7	hairpin	mir-874
mmu-miR-1938	4	hairpin	undef
mmu-miR-29a-5p	9	hairpin	mir-29
mmu_piR_019626	1	piRNA	mmu_piR_019626
mmu-miR-181a-2-3p	11	hairpin	mir-181
mmu_piR_018694	1	piRNA	mmu_piR_018694
mmu_piR_027027	24	piRNA	mmu_piR_027027
mmu-miR-146a-5p	6842	hairpin	mir-146
mmu_piR_032917	3	piRNA	mmu_piR_032917
mmu-miR-466k	5	hairpin	mir-466
mmu-miR-138-5p	18	mature	mir-138
mmu_piR_003362	1	piRNA	mmu_piR_003362
mmu-miR-122-3p	4	hairpin	mir-122
mmu_piR_029636	1	piRNA	mmu_piR_029636
mmu-miR-144-3p	104	hairpin	mir-144
mmu-miR-15b-3p	85	hairpin	mir-15
mmu_piR_028107	1	piRNA	mmu_piR_028107
mmu_piR_019198	1	piRNA	mmu_piR_019198
mmu_piR_006452	1	piRNA	mmu_piR_006452
mmu-miR-30c-5p	1	mature	mir-30
mmu-miR-381-3p	9	mature	mir-154
mmu-miR-193b-3p	90	mature	mir-193
mmu-miR-543-5p	1	mature	mir-329
mmu_piR_006810	1	piRNA	mmu_piR_006810
mmu_piR_002821	1	piRNA	mmu_piR_002821
mmu-miR-181a-1-3p	1	mature	mir-181
mmu_piR_022234	1	piRNA	mmu_piR_022234
mmu_piR_020492	4	piRNA	mmu_piR_020492
mmu_piR_010272	1	piRNA	mmu_piR_010272
mmu_piR_019253	3	piRNA	mmu_piR_019253
mmu_piR_017231	1	piRNA	mmu_piR_017231
mmu_piR_020872	1	piRNA	mmu_piR_020872
mmu-miR-139-5p	761	mature	mir-139
mmu_piR_039478	9	piRNA	mmu_piR_039478
mmu_piR_016417	1	piRNA	mmu_piR_016417
mmu-let-7a-5p	1042	hairpin	let-7
mmu-miR-200a-3p	10	hairpin	mir-8
mmu_piR_021120	1	piRNA	mmu_piR_021120
mmu_piR_039885	1	piRNA	mmu_piR_039885
mmu-miR-669l-5p	2	mature	mir-467
mmu_piR_021934	1	piRNA	mmu_piR_021934
mmu_piR_028746	1	piRNA	mmu_piR_028746
mmu_piR_008323	1	piRNA	mmu_piR_008323
mmu-miR-669h-5p	1	hairpin	mir-467
mmu_piR_028022	2	piRNA	mmu_piR_028022
mmu-miR-125b-5p	12	mature	mir-10
mmu_piR_023529	1	piRNA	mmu_piR_023529
mmu_piR_006463	1	piRNA	mmu_piR_006463
mmu-miR-7658-5p	3	hairpin	undef
mmu_piR_034355	1	piRNA	mmu_piR_034355
mmu_piR_024706	1	piRNA	mmu_piR_024706
mmu-miR-23a-3p	7040	hairpin	mir-23
mmu_piR_027306	1	piRNA	mmu_piR_027306
mmu_piR_027035	1	piRNA	mmu_piR_027035
mmu-miR-1945	10	hairpin	undef
mmu-miR-7073-3p	8	hairpin	undef
mmu-miR-1964-3p	33	mature	undef
mmu-miR-182-3p	9	hairpin	mir-182
mmu_piR_023412	2	piRNA	mmu_piR_023412
mmu-miR-760-3p	6	hairpin	mir-760
mmu-miR-877-5p	15	mature	mir-877
mmu_piR_024435	1	piRNA	mmu_piR_024435
mmu_piR_021174	2	piRNA	mmu_piR_021174
mmu_piR_005329	12	piRNA	mmu_piR_005329
mmu-miR-99b-3p	11	hairpin	mir-10
mmu_piR_038777	1	piRNA	mmu_piR_038777
mmu_piR_034657	1	piRNA	mmu_piR_034657
mmu-miR-7008-3p	1	hairpin	undef
mmu_piR_031179	1	piRNA	mmu_piR_031179
mmu_piR_026267	1	piRNA	mmu_piR_026267
mmu-miR-7052-5p	1	hairpin	undef
mmu-miR-374b-5p	22	mature	mir-374
mmu-miR-191-3p	19	mature	mir-191
mmu_piR_039536	1	piRNA	mmu_piR_039536
mmu_piR_018181	1	piRNA	mmu_piR_018181
mmu_piR_006302	1	piRNA	mmu_piR_006302
mmu_piR_012135	2	piRNA	mmu_piR_012135
mmu-miR-467e-5p	5	mature	mir-467
mmu-miR-22-5p	98	hairpin	mir-22
mmu_piR_014380	1	piRNA	mmu_piR_014380
mmu_piR_028710	1	piRNA	mmu_piR_028710
mmu_piR_006054	2	piRNA	mmu_piR_006054
mmu-miR-122-5p	1761	hairpin	mir-122
mmu-miR-711	19	hairpin	mir-711
mmu_piR_029156	6	piRNA	mmu_piR_029156
mmu_piR_000273	22	piRNA	mmu_piR_000273
mmu-miR-6910-5p	3	hairpin	undef
mmu-miR-455-5p	3	hairpin	mir-455
mmu-miR-26a-5p	840	mature	mir-26
mmu_piR_028163	1	piRNA	mmu_piR_028163
mmu_piR_034302	1	piRNA	mmu_piR_034302
mmu-miR-16-5p	5151	mature	mir-15
mmu_piR_024390	1	piRNA	mmu_piR_024390
mmu_piR_018878	1	piRNA	mmu_piR_018878
mmu_piR_026335	1	piRNA	mmu_piR_026335
mmu_piR_002130	1	piRNA	mmu_piR_002130
mmu-miR-3470a	3	mature	mir-3470
mmu-miR-218-5p	43	mature	mir-218
mmu-miR-191-5p	1205	hairpin	mir-191
mmu-miR-7071-3p	6	hairpin	undef
mmu_piR_011988	27	piRNA	mmu_piR_011988
mmu_piR_016353	1	piRNA	mmu_piR_016353
mmu_piR_016769	1	piRNA	mmu_piR_016769
mmu_piR_012961	7	piRNA	mmu_piR_012961
mmu_piR_035519	1	piRNA	mmu_piR_035519
mmu-miR-185-5p	374	hairpin	mir-185
mmu_piR_038399	2	piRNA	mmu_piR_038399
mmu-miR-324-5p	4	hairpin	mir-324
mmu-miR-5123	12	hairpin	undef
mmu_piR_031333	1	piRNA	mmu_piR_031333
mmu_piR_030277	2	piRNA	mmu_piR_030277
mmu_piR_013935	1	piRNA	mmu_piR_013935
mmu_piR_024062	1	piRNA	mmu_piR_024062
mmu-miR-143-3p	1430	mature	mir-143
mmu-miR-410-3p	4	hairpin	mir-154
mmu-miR-203b-5p	7	hairpin	undef
mmu-miR-6971-5p	1	hairpin	undef
mmu_piR_039953	1	piRNA	mmu_piR_039953
mmu-miR-7050-5p	2	hairpin	undef
mmu-miR-215-5p	616	hairpin	mir-192
mmu_piR_038916	1	piRNA	mmu_piR_038916
mmu-miR-5107-5p	1	hairpin	undef
mmu-miR-130a-3p	98	hairpin	mir-130
mmu-miR-499-5p	40	hairpin	mir-499
mmu-miR-15a-5p	84	hairpin	mir-15
mmu_piR_039800	1	piRNA	mmu_piR_039800
mmu-miR-101b-3p	146	mature	mir-101
mmu_piR_035651	1	piRNA	mmu_piR_035651
mmu-miR-871-5p	2	hairpin	mir-743
mmu-miR-185-5p	244	mature	mir-185
mmu-miR-872-5p	73	hairpin	mir-872
mmu-miR-15b-5p	14	mature	mir-15
mmu-miR-138-2-3p	1	mature	mir-138
mmu-miR-467a-3p	1	hairpin	mir-467
mmu_piR_006927	1	piRNA	mmu_piR_006927
mmu-miR-669d-5p	4	hairpin	mir-467
mmu-miR-1943-3p	3	hairpin	undef
mmu-miR-615-3p	7	mature	mir-615
mmu_piR_026730	1	piRNA	mmu_piR_026730
mmu-miR-122-3p	1	mature	mir-122
mmu-miR-326-3p	329	hairpin	mir-326
mmu_piR_011342	1	piRNA	mmu_piR_011342
mmu-miR-1193-3p	2	hairpin	mir-1193
mmu_piR_002601	1	piRNA	mmu_piR_002601
mmu-miR-130b-5p	18	hairpin	mir-130
mmu-miR-125a-5p	417	hairpin	mir-10
mmu-miR-12178-3p	2	hairpin	undef
mmu-miR-3058-3p	3	hairpin	undef
mmu_piR_022133	8	piRNA	mmu_piR_022133
mmu-miR-192-5p	2508	hairpin	mir-192
mmu-miR-129b-5p	2	mature	mir-129
mmu_piR_020917	1	piRNA	mmu_piR_020917
mmu-miR-423-3p	1255	mature	mir-423
mmu_piR_016422	25	piRNA	mmu_piR_016422
mmu_piR_004643	2	piRNA	mmu_piR_004643
mmu_piR_010488	1	piRNA	mmu_piR_010488
mmu-miR-30d-3p	1	mature	mir-30
mmu_piR_037747	1	piRNA	mmu_piR_037747
mmu_piR_000063	5	piRNA	mmu_piR_000063
mmu-miR-194-5p	3	mature	mir-194
mmu-miR-501-3p	7	mature	mir-500
mmu-miR-181b-5p	1	mature	mir-181
mmu_piR_007724	2	piRNA	mmu_piR_007724
mmu_piR_038312	18	piRNA	mmu_piR_038312
mmu_piR_027112	1	piRNA	mmu_piR_027112
mmu-miR-8112	15	mature	undef
mmu_piR_039472	1	piRNA	mmu_piR_039472
mmu_piR_000691	1265	piRNA	mmu_piR_000691
mmu-miR-8116	22	hairpin	undef
mmu-miR-219a-5p	1	mature	mir-219
mmu_piR_004249	2	piRNA	mmu_piR_004249
mmu-miR-421-5p	2	mature	mir-95
mmu-miR-98-3p	1	mature	let-7
mmu-miR-7067-3p	1	hairpin	undef
mmu_piR_031448	587	piRNA	mmu_piR_031448
mmu_piR_016704	1	piRNA	mmu_piR_016704
mmu-miR-712-5p	2	hairpin	undef
mmu_piR_027032	1	piRNA	mmu_piR_027032
mmu_piR_001795	1	piRNA	mmu_piR_001795
mmu_piR_036956	1	piRNA	mmu_piR_036956
mmu-miR-872-3p	148	hairpin	mir-872
mmu_piR_030961	1	piRNA	mmu_piR_030961
mmu_piR_010900	1	piRNA	mmu_piR_010900
mmu_piR_027743	10	piRNA	mmu_piR_027743
mmu_piR_019106	2	piRNA	mmu_piR_019106
mmu-miR-143-3p	485	hairpin	mir-143
mmu_piR_039364	1	piRNA	mmu_piR_039364
mmu-miR-423-5p	16	hairpin	mir-423
mmu-miR-700-5p	15	hairpin	undef
mmu_piR_016010	1	piRNA	mmu_piR_016010
mmu_piR_015732	1	piRNA	mmu_piR_015732
mmu-miR-142a-3p	3	mature	mir-142
mmu-miR-101a-3p	7	hairpin	mir-101
mmu-miR-140-3p	61	mature	mir-140
mmu-miR-6904-3p	1	hairpin	undef
mmu_piR_008304	1	piRNA	mmu_piR_008304
mmu_piR_033250	1	piRNA	mmu_piR_033250
mmu-miR-200b-3p	28	hairpin	mir-8
mmu-miR-6991-3p	2	mature	undef
mmu_piR_009751	1	piRNA	mmu_piR_009751
mmu-miR-26b-5p	103	mature	mir-26
mmu-miR-20b-5p	8	hairpin	mir-17
mmu-miR-128-1-5p	1	hairpin	mir-128
mmu-miR-34b-5p	1	mature	mir-34
mmu_piR_010858	4	piRNA	mmu_piR_010858
mmu-miR-3965	1	hairpin	undef
mmu-miR-361-5p	2	mature	mir-361
mmu-miR-223-3p	707	hairpin	mir-223
mmu-miR-99b-5p	230	mature	mir-10
mmu_piR_013592	1	piRNA	mmu_piR_013592
mmu_piR_022820	13	piRNA	mmu_piR_022820
mmu-miR-9-5p	1	hairpin	mir-9
mmu-miR-186-5p	4	mature	mir-186
mmu-miR-15b-5p	122	hairpin	mir-15
mmu-miR-148a-3p	5	hairpin	mir-148
mmu-miR-134-5p	1	hairpin	mir-134
mmu_piR_001472	1	piRNA	mmu_piR_001472
mmu-miR-219b-5p	1	hairpin	mir-219
mmu-miR-342-5p	1	mature	mir-342
mmu_piR_004801	1	piRNA	mmu_piR_004801
mmu_piR_010009	1	piRNA	mmu_piR_010009
mmu-miR-322-5p	15	mature	mir-322
mmu-miR-7053-3p	1	hairpin	undef
mmu-miR-196a-5p	2	hairpin	mir-196
mmu-miR-574-3p	24	hairpin	mir-574
mmu_piR_020259	1	piRNA	mmu_piR_020259
mmu_piR_009399	1	piRNA	mmu_piR_009399
mmu-miR-666-3p	6	hairpin	mir-666
mmu-miR-23b-5p	1	hairpin	mir-23
mmu_piR_002945	1	piRNA	mmu_piR_002945
mmu_piR_039414	2	piRNA	mmu_piR_039414
mmu-miR-5126	73	mature	undef
mmu_piR_035188	4	piRNA	mmu_piR_035188
mmu_piR_014539	1	piRNA	mmu_piR_014539
mmu-miR-6961-5p	7	mature	undef
mmu-miR-195a-3p	2	hairpin	mir-15
mmu_piR_001526	1	piRNA	mmu_piR_001526
mmu-miR-669c-5p	14	mature	mir-467
mmu_piR_015035	1	piRNA	mmu_piR_015035
mmu_piR_018516	2	piRNA	mmu_piR_018516
mmu-miR-471-3p	2	mature	mir-471
mmu_piR_005656	1	piRNA	mmu_piR_005656
mmu_piR_036192	1	piRNA	mmu_piR_036192
mmu_piR_030423	1	piRNA	mmu_piR_030423
mmu_piR_006884	1	piRNA	mmu_piR_006884
mmu-miR-210-3p	3	mature	mir-210
mmu_piR_020885	4	piRNA	mmu_piR_020885
mmu-miR-877-3p	11	hairpin	mir-877
mmu-miR-328-3p	1800	mature	mir-328
mmu_piR_014826	3	piRNA	mmu_piR_014826
mmu-miR-200c-3p	1	mature	mir-8
mmu-miR-467c-5p	3	mature	mir-467
mmu-miR-8091	1	mature	undef
mmu-miR-21a-5p	6381	hairpin	mir-21
mmu_piR_017860	1	piRNA	mmu_piR_017860
mmu-miR-384-5p	4	mature	mir-384
mmu_piR_006855	2	piRNA	mmu_piR_006855
mmu_piR_005355	4	piRNA	mmu_piR_005355
mmu-miR-652-3p	3562	mature	mir-652
mmu-miR-485-5p	2	hairpin	mir-485
mmu_piR_033910	1	piRNA	mmu_piR_033910
mmu-let-7c-5p	568	hairpin	let-7
mmu-miR-126a-3p	682	mature	mir-126
mmu_piR_008873	1	piRNA	mmu_piR_008873
mmu-miR-6899-3p	3	hairpin	undef
mmu_piR_019827	1	piRNA	mmu_piR_019827
mmu_piR_002757	1	piRNA	mmu_piR_002757
mmu-miR-188-5p	2	hairpin	mir-188
mmu_piR_018484	2	piRNA	mmu_piR_018484
mmu-miR-671-5p	1	hairpin	mir-671
mmu_piR_038351	16	piRNA	mmu_piR_038351
mmu_piR_032865	2	piRNA	mmu_piR_032865
mmu_piR_024666	2	piRNA	mmu_piR_024666
mmu_piR_033809	1	piRNA	mmu_piR_033809
mmu_piR_025160	1	piRNA	mmu_piR_025160
mmu_piR_035539	1	piRNA	mmu_piR_035539
mmu-miR-5126	2066	hairpin	undef
mmu-miR-214-3p	3	mature	mir-214
mmu_piR_005287	1	piRNA	mmu_piR_005287
mmu-let-7a-5p	1708	mature	let-7
mmu-miR-331-5p	2	hairpin	mir-331
mmu_piR_033103	1	piRNA	mmu_piR_033103
mmu-miR-202-5p	3	mature	mir-202
mmu_piR_032538	1	piRNA	mmu_piR_032538
mmu_piR_024536	1	piRNA	mmu_piR_024536
mmu-miR-3475-5p	1	hairpin	undef
mmu-let-7a-1-3p,mmu-let-7c-2-3p	105	hairpin	let-7
mmu_piR_026131	1	piRNA	mmu_piR_026131
mmu_piR_021829	7	piRNA	mmu_piR_021829
mmu-miR-322-3p	7	mature	mir-322
mmu-miR-7024-3p	5	hairpin	undef
mmu-miR-6769b-3p	1	hairpin	undef
mmu-miR-6910-3p	5	hairpin	undef
mmu_piR_023492	1	piRNA	mmu_piR_023492
mmu-miR-872-5p	208	mature	mir-872
mmu-miR-376c-3p	1	hairpin	mir-368
mmu-miR-7052-3p	2	hairpin	undef
mmu_piR_022650	1	piRNA	mmu_piR_022650
mmu_piR_027735	1	piRNA	mmu_piR_027735
mmu_piR_025120	1	piRNA	mmu_piR_025120
mmu-miR-450b-3p	4	hairpin	mir-450
mmu-miR-500-3p	5	mature	mir-500
mmu-miR-674-3p	5	hairpin	mir-674
mmu_piR_000802	1	piRNA	mmu_piR_000802
mmu-miR-200b-5p	5	hairpin	mir-8
mmu-let-7e-5p	4	mature	let-7
mmu-miR-138-5p	51	hairpin	mir-138
mmu-miR-7014-5p	5	hairpin	undef
mmu_piR_006112	6	piRNA	mmu_piR_006112
mmu-miR-151-3p	80	hairpin	mir-28
mmu_piR_005659	2	piRNA	mmu_piR_005659
mmu_piR_012584	1	piRNA	mmu_piR_012584
mmu_piR_002293	1	piRNA	mmu_piR_002293
mmu-miR-450a-5p	39	hairpin	mir-450
mmu-miR-7662-3p	4	hairpin	undef
mmu_piR_004071	1	piRNA	mmu_piR_004071
mmu_piR_000046	1	piRNA	mmu_piR_000046
mmu-miR-7002-5p	6	hairpin	undef
mmu-miR-425-3p	68	mature	mir-425
mmu-miR-2861	45	hairpin	mir-2861
mmu_piR_029739	3	piRNA	mmu_piR_029739
mmu_piR_030391	1	piRNA	mmu_piR_030391
mmu-miR-30a-5p	26	hairpin	mir-30
mmu-miR-125b-2-3p	5	hairpin	mir-10
mmu_piR_034250	6	piRNA	mmu_piR_034250
mmu-miR-126a-3p	718	hairpin	mir-126
mmu-miR-153-3p	1	mature	mir-153
mmu_piR_016206	1	piRNA	mmu_piR_016206
mmu_piR_029543	1	piRNA	mmu_piR_029543
mmu_piR_008014	1	piRNA	mmu_piR_008014
mmu_piR_013763	3	piRNA	mmu_piR_013763
mmu-miR-6538	140	hairpin	undef
mmu-miR-5103	7	mature	undef
mmu-miR-142b	1	hairpin	mir-142
mmu_piR_023204	1	piRNA	mmu_piR_023204
mmu-miR-532-5p	53	hairpin	mir-188
mmu_piR_000870	6	piRNA	mmu_piR_000870
mmu-miR-7009-5p	1	hairpin	undef
mmu_piR_006156	3	piRNA	mmu_piR_006156
mmu_piR_038339	6	piRNA	mmu_piR_038339
mmu_piR_011905	1	piRNA	mmu_piR_011905
mmu-miR-326-3p	147	mature	mir-326
mmu-miR-341-3p	34	hairpin	mir-341
mmu_piR_014551	1	piRNA	mmu_piR_014551
mmu_piR_009477	1	piRNA	mmu_piR_009477
mmu_piR_017798	1	piRNA	mmu_piR_017798
mmu-miR-7672-5p	2	hairpin	undef
mmu-miR-17-3p	20	hairpin	mir-17
mmu-miR-132-5p	22	hairpin	mir-132
mmu_piR_039837	3	piRNA	mmu_piR_039837
mmu_piR_038352	1	piRNA	mmu_piR_038352
mmu_piR_036640	6	piRNA	mmu_piR_036640
mmu-miR-3470b	1	mature	mir-3470
mmu_piR_026073	1	piRNA	mmu_piR_026073
mmu_piR_039940	1	piRNA	mmu_piR_039940
mmu_piR_003400	1	piRNA	mmu_piR_003400
mmu-miR-93-3p	1	mature	mir-17
mmu-miR-204-5p	151	mature	mir-204
mmu-miR-9b-3p	5	hairpin	undef
mmu_piR_022526	2	piRNA	mmu_piR_022526
mmu-miR-7119-5p	9	hairpin	undef
mmu-miR-328-3p	11770	hairpin	mir-328
mmu_piR_022097	4193	piRNA	mmu_piR_022097
mmu-miR-301b-3p	11	hairpin	mir-130
mmu_piR_035757	5	piRNA	mmu_piR_035757
mmu_piR_019542	4	piRNA	mmu_piR_019542
mmu_piR_011700	1	piRNA	mmu_piR_011700
mmu-miR-210-5p	1	mature	mir-210
mmu-miR-652-3p	1476	hairpin	mir-652
mmu_piR_016455	1	piRNA	mmu_piR_016455
mmu_piR_009390	1	piRNA	mmu_piR_009390
mmu-miR-450b-3p	9	mature	mir-450
mmu_piR_022331	1	piRNA	mmu_piR_022331
mmu-miR-30c-5p	26	hairpin	mir-30
mmu_piR_016942	1	piRNA	mmu_piR_016942
mmu_piR_013767	1	piRNA	mmu_piR_013767
mmu-miR-23b-3p	40	hairpin	mir-23
mmu_piR_011419	1	piRNA	mmu_piR_011419
mmu_piR_006372	1	piRNA	mmu_piR_006372
mmu-miR-673-5p	1	hairpin	mir-673
mmu-miR-1968-5p	3	hairpin	undef
mmu_piR_016072	1	piRNA	mmu_piR_016072
mmu_piR_010255	1	piRNA	mmu_piR_010255
mmu-miR-503-3p	46	mature	mir-503
mmu_piR_016069	10	piRNA	mmu_piR_016069
mmu-miR-425-5p	314	hairpin	mir-425
mmu-miR-190b-5p	7	mature	mir-190
mmu-miR-486b-3p	97	mature	mir-486
mmu_piR_030794	1	piRNA	mmu_piR_030794
mmu_piR_028832	1	piRNA	mmu_piR_028832
mmu-miR-32-5p	15	hairpin	mir-32
mmu-miR-574-3p	209	mature	mir-574
mmu_piR_000958	18	piRNA	mmu_piR_000958
mmu_piR_018553	1	piRNA	mmu_piR_018553
mmu_piR_015833	1	piRNA	mmu_piR_015833
mmu_piR_023232	1	piRNA	mmu_piR_023232
mmu_piR_011436	1	piRNA	mmu_piR_011436
mmu_piR_006748	1	piRNA	mmu_piR_006748
mmu_piR_033037	1	piRNA	mmu_piR_033037
mmu-miR-151-5p	203	mature	mir-28
mmu-miR-6900-3p	1	mature	undef
mmu-miR-1306-3p	42	hairpin	mir-1306
mmu_piR_022604	1	piRNA	mmu_piR_022604
mmu-miR-133a-3p	32	mature	mir-133
mmu-miR-6980-3p	11	hairpin	undef
mmu_piR_000499	2	piRNA	mmu_piR_000499
mmu-miR-10a-5p	1202	mature	mir-10
mmu-let-7b-5p	1031	hairpin	let-7
mmu_piR_038600	1	piRNA	mmu_piR_038600
mmu_piR_028701	1	piRNA	mmu_piR_028701
mmu-miR-6941-5p	4	hairpin	undef
mmu_piR_012288	3	piRNA	mmu_piR_012288
mmu-miR-129-2-3p	2	hairpin	mir-129
mmu_piR_025218	1	piRNA	mmu_piR_025218
mmu_piR_007429	1	piRNA	mmu_piR_007429
mmu_piR_021135	1	piRNA	mmu_piR_021135
mmu-miR-6980-5p	6	hairpin	undef
mmu_piR_019924	1	piRNA	mmu_piR_019924
mmu-miR-7004-5p	3	hairpin	undef
mmu-miR-215-3p	54	hairpin	mir-192
mmu_piR_035858	1	piRNA	mmu_piR_035858
mmu-miR-500-3p	3	hairpin	mir-500
mmu-let-7b-5p	987	mature	let-7
mmu-miR-702-3p	1	mature	mir-702
mmu_piR_004115	1	piRNA	mmu_piR_004115
mmu_piR_021182	1	piRNA	mmu_piR_021182
mmu_piR_034395	2	piRNA	mmu_piR_034395
mmu_piR_001334	2	piRNA	mmu_piR_001334
mmu-miR-127-3p	139	hairpin	mir-127
mmu-miR-24-1-5p	25	hairpin	mir-24
mmu_piR_021185	1	piRNA	mmu_piR_021185
mmu_piR_018409	7	piRNA	mmu_piR_018409
mmu-miR-26a-5p	68	hairpin	mir-26
mmu-miR-499-5p	63	mature	mir-499
mmu_piR_036718	3	piRNA	mmu_piR_036718
mmu-miR-1947-5p	3	hairpin	undef
mmu_piR_000219	4	piRNA	mmu_piR_000219
mmu_piR_023327	1	piRNA	mmu_piR_023327
mmu-miR-486a-5p,mmu-miR-486b-5p	1779	mature	mir-486
mmu-miR-30e-3p	5	mature	mir-30
mmu_piR_020337	3	piRNA	mmu_piR_020337
mmu-miR-101b-3p	15	hairpin	mir-101
mmu_piR_020478	1	piRNA	mmu_piR_020478
mmu-miR-2137	10	hairpin	undef
mmu_piR_030068	1	piRNA	mmu_piR_030068
mmu_piR_032829	2	piRNA	mmu_piR_032829
mmu-miR-339-5p	4	mature	mir-339
mmu-miR-382-5p	11	mature	mir-154
mmu-miR-340-3p	1	hairpin	mir-340
mmu-miR-770-5p	1	hairpin	mir-770
mmu-miR-192-5p	2435	mature	mir-192
mmu-miR-99a-5p	1190	hairpin	mir-10
mmu_piR_006607	1	piRNA	mmu_piR_006607
mmu_piR_018860	3	piRNA	mmu_piR_018860
mmu-miR-146b-5p	15	hairpin	mir-146
mmu_piR_036377	6	piRNA	mmu_piR_036377
mmu_piR_038354	1	piRNA	mmu_piR_038354
mmu-miR-7089-5p	1	hairpin	undef
mmu-miR-12190-3p	1	hairpin	undef
mmu_piR_014590	1	piRNA	mmu_piR_014590
mmu_piR_005789	1	piRNA	mmu_piR_005789
mmu_piR_025803	1	piRNA	mmu_piR_025803
mmu_piR_010143	1	piRNA	mmu_piR_010143
mmu-miR-5123	1	mature	undef
mmu_piR_038948	1	piRNA	mmu_piR_038948
mmu-miR-214-5p	9	hairpin	mir-214
mmu-miR-744-5p	15	hairpin	mir-744
mmu_piR_027070	1	piRNA	mmu_piR_027070
mmu-let-7e-3p	60	hairpin	let-7
mmu_piR_018376	1	piRNA	mmu_piR_018376
mmu-miR-378c	3	mature	undef
mmu_piR_027807	2	piRNA	mmu_piR_027807
mmu_piR_011972	1	piRNA	mmu_piR_011972
mmu_piR_009280	1	piRNA	mmu_piR_009280
mmu_piR_004567	11	piRNA	mmu_piR_004567
mmu-miR-466f-3p	2	hairpin	mir-467
mmu_piR_012675	1	piRNA	mmu_piR_012675
mmu-miR-350-3p	80	hairpin	mir-350
mmu-miR-25-3p	3559	mature	mir-25
mmu_piR_008778	1	piRNA	mmu_piR_008778
mmu-miR-6956-3p	2	hairpin	undef
mmu-miR-22-5p	1	mature	mir-22
mmu_piR_026519	1	piRNA	mmu_piR_026519
mmu_piR_034301	1	piRNA	mmu_piR_034301
mmu_piR_012169	1	piRNA	mmu_piR_012169
mmu_piR_020879	1	piRNA	mmu_piR_020879
mmu-miR-429-3p	1615	hairpin	mir-8
mmu-let-7g-3p	3	hairpin	let-7
mmu-let-7f-1-3p	35	hairpin	let-7
mmu_piR_000672	1	piRNA	mmu_piR_000672
mmu_piR_019199	1	piRNA	mmu_piR_019199
mmu-miR-212-3p	37	hairpin	mir-132
mmu_piR_034691	1	piRNA	mmu_piR_034691
mmu-miR-330-5p	234	hairpin	mir-330
mmu_piR_020607	1	piRNA	mmu_piR_020607
mmu_piR_015368	1	piRNA	mmu_piR_015368
mmu_piR_031218	6	piRNA	mmu_piR_031218
mmu-miR-29b-1-5p	6	hairpin	mir-29
mmu_piR_014472	1	piRNA	mmu_piR_014472
mmu_piR_022336	2	piRNA	mmu_piR_022336
mmu-miR-106b-3p	7	hairpin	mir-17
mmu-miR-802-3p	3	mature	mir-802
mmu-miR-3474	4	hairpin	undef
mmu_piR_016083	1	piRNA	mmu_piR_016083
mmu-miR-19b-3p	65	mature	mir-19
mmu-miR-344-3p	2	hairpin	mir-344
mmu_piR_006847	1	piRNA	mmu_piR_006847
mmu_piR_000667	1	piRNA	mmu_piR_000667
mmu_piR_020227	1	piRNA	mmu_piR_020227
mmu-miR-676-3p	266	mature	mir-676
mmu_piR_033288	1	piRNA	mmu_piR_033288
mmu-miR-330-3p	1	mature	mir-330
mmu-miR-1b-5p	199	hairpin	mir-1
mmu_piR_011180	1	piRNA	mmu_piR_011180
mmu-miR-5132-3p	4	hairpin	mir-5132
mmu-miR-3059-5p	1	hairpin	mir-3059
mmu-miR-132-5p	4	mature	mir-132
mmu-let-7g-5p	4098	mature	let-7
mmu_piR_036494	2	piRNA	mmu_piR_036494
mmu-miR-669e-5p	1	mature	mir-467
mmu-miR-340-5p	3	hairpin	mir-340
mmu-miR-7115-5p	3	hairpin	undef
mmu_piR_016536	2	piRNA	mmu_piR_016536
mmu_piR_032125	1	piRNA	mmu_piR_032125
mmu_piR_023693	1	piRNA	mmu_piR_023693
mmu-miR-378d	2	hairpin	undef
mmu_piR_030125	1	piRNA	mmu_piR_030125
mmu-miR-222-3p	49	mature	mir-221
mmu_piR_027510	1	piRNA	mmu_piR_027510
mmu_piR_026137	107	piRNA	mmu_piR_026137
mmu_piR_012532	1	piRNA	mmu_piR_012532
mmu-miR-1934-5p	2	mature	undef
mmu-miR-379-5p	63	hairpin	mir-379
mmu_piR_007099	1	piRNA	mmu_piR_007099
mmu-miR-7a-1-3p	104	mature	mir-7
mmu-miR-7085-3p	1	hairpin	undef
mmu-miR-15b-3p	4	mature	mir-15
mmu-miR-296-5p	72	mature	mir-296
mmu_piR_029343	53	piRNA	mmu_piR_029343
mmu_piR_014491	1	piRNA	mmu_piR_014491
mmu-miR-128-1-5p	1	mature	mir-128
mmu_piR_000620	14	piRNA	mmu_piR_000620
mmu_piR_035643	4	piRNA	mmu_piR_035643
mmu-miR-1983	153	mature	undef
mmu-miR-181a-5p	131	mature	mir-181
mmu-miR-92a-3p	1435	mature	mir-25
mmu_piR_008481	1	piRNA	mmu_piR_008481
mmu_piR_030415	2	piRNA	mmu_piR_030415
mmu_piR_014326	1	piRNA	mmu_piR_014326
mmu_piR_023851	1	piRNA	mmu_piR_023851
mmu-miR-494-5p	8	hairpin	mir-154
mmu_piR_005074	1	piRNA	mmu_piR_005074
mmu-miR-669b-5p	18	mature	mir-467
mmu-miR-1964-3p	25	hairpin	undef
mmu-miR-7085-5p	2	hairpin	undef
mmu_piR_021785	2138	piRNA	mmu_piR_021785
mmu-miR-1981-3p	3	hairpin	undef
mmu-miR-146a-5p	12132	mature	mir-146
mmu_piR_018774	2	piRNA	mmu_piR_018774
mmu_piR_015705	2	piRNA	mmu_piR_015705
mmu_piR_024588	1	piRNA	mmu_piR_024588
mmu-miR-93-5p	7115	hairpin	mir-17
mmu_piR_035528	1	piRNA	mmu_piR_035528
mmu-miR-30a-5p	38	mature	mir-30
mmu_piR_031348	1	piRNA	mmu_piR_031348
mmu-miR-1249-3p	7	hairpin	mir-1249
mmu_piR_036323	1	piRNA	mmu_piR_036323
mmu-miR-335-5p	1	hairpin	mir-335
mmu_piR_013221	1	piRNA	mmu_piR_013221
mmu_piR_017068	1	piRNA	mmu_piR_017068
mmu_piR_005211	1	piRNA	mmu_piR_005211
mmu_piR_019445	1	piRNA	mmu_piR_019445
mmu-miR-6945-3p	1	hairpin	undef
mmu_piR_033476	1	piRNA	mmu_piR_033476
mmu-miR-351-3p	4	hairpin	mir-351
mmu_piR_001570	12	piRNA	mmu_piR_001570
mmu_piR_005393	1	piRNA	mmu_piR_005393
mmu-miR-3068-5p	1	mature	mir-3068
mmu-miR-187-3p	26	hairpin	mir-187
mmu-miR-6538	9	mature	undef
mmu_piR_031081	1	piRNA	mmu_piR_031081
mmu_piR_023644	1	piRNA	mmu_piR_023644
mmu_piR_038405	1	piRNA	mmu_piR_038405
mmu-miR-183-3p	3	hairpin	mir-183
mmu-miR-30a-3p	267	hairpin	mir-30
mmu-miR-24-3p	9287	mature	mir-24
mmu_piR_017123	4	piRNA	mmu_piR_017123
mmu_piR_013605	1	piRNA	mmu_piR_013605
mmu_piR_019578	2	piRNA	mmu_piR_019578
mmu-miR-669c-5p	1	hairpin	mir-467
mmu_piR_028650	1	piRNA	mmu_piR_028650
mmu_piR_028055	15	piRNA	mmu_piR_028055
mmu-miR-223-5p	66	mature	mir-223
mmu-let-7d-5p	230	hairpin	let-7
mmu-miR-467b-5p	11	hairpin	mir-467
mmu_piR_036610	1	piRNA	mmu_piR_036610
mmu_piR_000634	11	piRNA	mmu_piR_000634
mmu_piR_025969	5	piRNA	mmu_piR_025969
mmu-miR-1199-5p	1	mature	mir-1199
mmu_piR_017805	1	piRNA	mmu_piR_017805
mmu-miR-193a-5p	1	mature	mir-193
mmu-miR-9-5p	1	mature	mir-9
mmu_piR_012470	6	piRNA	mmu_piR_012470
mmu-miR-219a-1-3p	2	mature	mir-219
mmu_piR_015841	1	piRNA	mmu_piR_015841
mmu_piR_009521	1	piRNA	mmu_piR_009521
mmu-miR-1943-5p	25	hairpin	undef
mmu_piR_010388	2	piRNA	mmu_piR_010388
mmu_piR_023030	1	piRNA	mmu_piR_023030
mmu_piR_036443	2	piRNA	mmu_piR_036443
mmu_piR_023707	1	piRNA	mmu_piR_023707
mmu-miR-6971-3p	5	hairpin	undef
mmu_piR_006097	3	piRNA	mmu_piR_006097
mmu-miR-450a-2-3p	2	mature	mir-450
mmu_piR_005251	1	piRNA	mmu_piR_005251
mmu-miR-122-5p	9545	mature	mir-122
mmu-miR-1247-3p	8	mature	mir-1247
mmu_piR_008428	3	piRNA	mmu_piR_008428
mmu_piR_001851	1	piRNA	mmu_piR_001851
mmu_piR_003250	1	piRNA	mmu_piR_003250
mmu-miR-27a-5p	1	mature	mir-27
mmu-miR-196a-5p	13	mature	mir-196
mmu-miR-465c-5p	1	hairpin	mir-465
mmu_piR_008116	5	piRNA	mmu_piR_008116
mmu-miR-470-5p	8	hairpin	mir-743
mmu_piR_031464	1	piRNA	mmu_piR_031464
mmu_piR_001101	1	piRNA	mmu_piR_001101
mmu_piR_027963	2	piRNA	mmu_piR_027963
mmu_piR_033911	1	piRNA	mmu_piR_033911
mmu-miR-369-5p	11	mature	mir-154
mmu_piR_019424	2	piRNA	mmu_piR_019424
mmu_piR_022135	1	piRNA	mmu_piR_022135
mmu-miR-134-5p	12	mature	mir-134
mmu-miR-24-3p	3455	hairpin	mir-24
mmu-miR-1198-5p	5963	mature	undef
mmu_piR_025974	1	piRNA	mmu_piR_025974
mmu_piR_029745	1	piRNA	mmu_piR_029745
mmu_piR_033105	1	piRNA	mmu_piR_033105
mmu_piR_022918	8	piRNA	mmu_piR_022918
mmu-miR-532-5p	6	mature	mir-188
mmu_piR_038739	4	piRNA	mmu_piR_038739
mmu_piR_019037	1	piRNA	mmu_piR_019037
mmu-miR-6933-5p	4	mature	undef
mmu_piR_010464	2	piRNA	mmu_piR_010464
mmu-miR-935	48	hairpin	mir-935
mmu_piR_009144	1	piRNA	mmu_piR_009144
mmu-miR-341-5p	1	mature	mir-341
mmu-miR-132-3p	5	hairpin	mir-132
mmu_piR_016325	1	piRNA	mmu_piR_016325
mmu-miR-7032-3p	1	hairpin	undef
mmu_piR_026273	1	piRNA	mmu_piR_026273
mmu_piR_009239	1	piRNA	mmu_piR_009239
mmu-miR-615-3p	38	hairpin	mir-615
mmu_piR_000585	57	piRNA	mmu_piR_000585
mmu-miR-146b-5p	5	mature	mir-146
mmu_piR_016408	1	piRNA	mmu_piR_016408
mmu-miR-1895	3	hairpin	undef
mmu_piR_029163	1	piRNA	mmu_piR_029163
mmu-miR-3060-5p	94	hairpin	undef
mmu_piR_013417	1	piRNA	mmu_piR_013417
mmu_piR_008509	1	piRNA	mmu_piR_008509
mmu_piR_010684	12	piRNA	mmu_piR_010684
mmu-miR-18a-5p	7	hairpin	mir-17
mmu_piR_022451	1	piRNA	mmu_piR_022451
mmu_piR_010181	1	piRNA	mmu_piR_010181
mmu_piR_010201	1	piRNA	mmu_piR_010201
mmu_piR_021009	1	piRNA	mmu_piR_021009
mmu-miR-203-3p	15	mature	mir-203
mmu-miR-3072-3p	1	hairpin	mir-3072
mmu_piR_031183	8	piRNA	mmu_piR_031183
mmu_piR_010485	1	piRNA	mmu_piR_010485
mmu-miR-465a-3p,mmu-miR-465b-3p,mmu-miR-465c-3p	10	hairpin	mir-465
mmu_piR_005271	1	piRNA	mmu_piR_005271
mmu_piR_038356	1	piRNA	mmu_piR_038356
mmu-miR-365-3p	8	mature	mir-365
mmu-miR-125b-1-3p	12	hairpin	mir-10
mmu-miR-341-3p	100	mature	mir-341
mmu-let-7g-5p	2809	hairpin	let-7
mmu-miR-331-3p	3	hairpin	mir-331
mmu-miR-409-3p	16	hairpin	mir-154
mmu_piR_002435	6	piRNA	mmu_piR_002435
mmu-miR-6999-3p	2	hairpin	undef
mmu-let-7e-5p	1	hairpin	let-7
mmu-miR-1981-5p	2	mature	undef
mmu-miR-23a-3p	2806	mature	mir-23
mmu_piR_006776	1	piRNA	mmu_piR_006776
mmu_piR_003945	1	piRNA	mmu_piR_003945
mmu-miR-145a-3p	7	hairpin	mir-145
mmu_piR_000331	1	piRNA	mmu_piR_000331
mmu-miR-17-5p	10	hairpin	mir-17
mmu-miR-100-5p	500	mature	mir-10
mmu-miR-155-5p	2	mature	mir-155
mmu-miR-712-3p	16	hairpin	undef
mmu_piR_020041	1	piRNA	mmu_piR_020041
mmu-miR-466h-3p	1	mature	mir-467
mmu-miR-100-5p	125	hairpin	mir-10
mmu_piR_002227	1	piRNA	mmu_piR_002227
mmu_piR_008603	1	piRNA	mmu_piR_008603
mmu-miR-365-3p	2	hairpin	mir-365
mmu-miR-3084-3p	3	mature	mir-3084
mmu-miR-431-5p	9	hairpin	mir-431
mmu_piR_003797	4	piRNA	mmu_piR_003797
mmu-miR-335-3p	4	hairpin	mir-335
mmu_piR_019711	1	piRNA	mmu_piR_019711
mmu-miR-3473b	1	mature	mir-3473
mmu-miR-1a-3p	40	hairpin	mir-1
mmu_piR_008228	1	piRNA	mmu_piR_008228
mmu-miR-193b-3p	34	hairpin	mir-193
mmu-miR-1306-3p	23	mature	mir-1306
mmu-miR-669f-5p	1	mature	mir-467
mmu_piR_025406	2	piRNA	mmu_piR_025406
mmu-miR-149-3p	1	hairpin	mir-149
mmu_piR_017601	1	piRNA	mmu_piR_017601
mmu_piR_011629	1	piRNA	mmu_piR_011629
mmu-miR-18a-3p	7	hairpin	mir-17
mmu_piR_032638	2	piRNA	mmu_piR_032638
mmu-miR-140-3p	110	hairpin	mir-140
mmu_piR_000739	1	piRNA	mmu_piR_000739
mmu_piR_000362	1	piRNA	mmu_piR_000362
mmu-miR-5136	4	hairpin	undef
mmu_piR_012158	1	piRNA	mmu_piR_012158
mmu-miR-145a-5p	139	mature	mir-145
mmu-miR-1981-5p	221	hairpin	undef
mmu_piR_007001	1	piRNA	mmu_piR_007001
mmu-miR-202-3p	2	hairpin	mir-202
mmu-miR-203-3p	8	hairpin	mir-203
mmu-miR-27b-3p	712	mature	mir-27
mmu_piR_023185	1	piRNA	mmu_piR_023185
mmu-miR-342-3p	129	mature	mir-342
mmu_piR_020173	1	piRNA	mmu_piR_020173
mmu_piR_002541	1	piRNA	mmu_piR_002541
mmu-miR-7682-3p	2	mature	undef
mmu-miR-15a-5p	100	mature	mir-15
mmu_piR_023772	1	piRNA	mmu_piR_023772
mmu_piR_010961	1	piRNA	mmu_piR_010961
mmu-miR-6963-3p	3	hairpin	undef
mmu-miR-149-5p	77	mature	mir-149
mmu-miR-3095-3p	4	mature	undef
mmu-miR-467a-5p	5	mature	mir-467
mmu-miR-3473a	10	hairpin	mir-3473
mmu-miR-155-5p	19	hairpin	mir-155
mmu-miR-128-3p	510	mature	mir-128
mmu_piR_011071	1	piRNA	mmu_piR_011071
mmu-miR-27a-5p	20	hairpin	mir-27
mmu-miR-3095-3p	2	hairpin	undef
mmu-miR-29a-3p	21	mature	mir-29
mmu_piR_012303	1	piRNA	mmu_piR_012303
mmu-miR-144-3p	18	mature	mir-144
mmu_piR_038108	1	piRNA	mmu_piR_038108
mmu_piR_036416	1	piRNA	mmu_piR_036416
mmu-miR-1970	3	mature	undef
mmu_piR_003245	1	piRNA	mmu_piR_003245
mmu_piR_013582	1	piRNA	mmu_piR_013582
mmu-miR-214-3p	5	hairpin	mir-214
mmu_piR_035724	1	piRNA	mmu_piR_035724
mmu_piR_029587	3	piRNA	mmu_piR_029587
mmu-miR-6937-3p	7	hairpin	undef
mmu-miR-6936-5p	1	hairpin	undef
mmu_piR_025736	1	piRNA	mmu_piR_025736
mmu-miR-181c-3p	1	hairpin	mir-181
mmu-miR-222-3p	447	hairpin	mir-221
mmu-miR-3102-5p.2-5p	3	mature	mir-3102
mmu_piR_000989	4	piRNA	mmu_piR_000989
mmu-miR-31-5p	27	mature	mir-31
mmu_piR_018544	3	piRNA	mmu_piR_018544
mmu-miR-31-5p	21	hairpin	mir-31
mmu_piR_036900	1	piRNA	mmu_piR_036900
mmu-miR-872-3p	61	mature	mir-872
mmu_piR_002917	1	piRNA	mmu_piR_002917
mmu-miR-7043-3p	7	mature	undef
mmu_piR_003262	1	piRNA	mmu_piR_003262
mmu_piR_007231	1	piRNA	mmu_piR_007231
mmu-miR-195a-3p	2	mature	mir-15
mmu_piR_013320	5	piRNA	mmu_piR_013320
mmu-miR-27b-3p	6591	hairpin	mir-27
mmu_piR_000904	1	piRNA	mmu_piR_000904
mmu-let-7b-3p	13	hairpin	let-7
mmu-miR-7658-3p	1	mature	undef
mmu_piR_013359	1	piRNA	mmu_piR_013359
mmu_piR_012353	3	piRNA	mmu_piR_012353
mmu-miR-542-5p	93	hairpin	mir-542
mmu-miR-148a-3p	57	mature	mir-148
mmu_piR_027042	1	piRNA	mmu_piR_027042
mmu_piR_018183	1	piRNA	mmu_piR_018183
mmu_piR_029883	1	piRNA	mmu_piR_029883
mmu-miR-7028-3p	3	hairpin	undef
mmu-miR-6935-3p	4	hairpin	undef
mmu-miR-92b-3p	84	hairpin	mir-25
mmu_piR_011732	1	piRNA	mmu_piR_011732
mmu_piR_004092	1	piRNA	mmu_piR_004092
mmu-miR-652-5p	1	mature	mir-652
mmu-miR-598-3p	6	hairpin	mir-598
mmu_piR_015311	1	piRNA	mmu_piR_015311
mmu_piR_009490	1	piRNA	mmu_piR_009490
mmu_piR_033925	1	piRNA	mmu_piR_033925
mmu-let-7i-3p	15	hairpin	let-7
mmu_piR_023116	1	piRNA	mmu_piR_023116
mmu-miR-6961-5p	7	hairpin	undef
mmu_piR_031201	1	piRNA	mmu_piR_031201
mmu_piR_010261	1	piRNA	mmu_piR_010261
mmu-miR-18a-5p	1	mature	mir-17
mmu-miR-5122	1	hairpin	undef
mmu-miR-6971-3p	2	mature	undef
mmu-miR-99b-5p	200	hairpin	mir-10
mmu-miR-145a-5p	84	hairpin	mir-145
mmu_piR_005034	2	piRNA	mmu_piR_005034
mmu-miR-329-3p	3	hairpin	mir-329
mmu_piR_004378	1	piRNA	mmu_piR_004378
mmu-miR-10b-5p	102	hairpin	mir-10
mmu_piR_017408	1	piRNA	mmu_piR_017408
mmu_piR_031688	1	piRNA	mmu_piR_031688
mmu-miR-672-5p	2	mature	mir-672
mmu_piR_003955	1	piRNA	mmu_piR_003955
mmu_piR_014874	1	piRNA	mmu_piR_014874
mmu_piR_038048	1	piRNA	mmu_piR_038048
mmu-miR-200a-3p	40	mature	mir-8
mmu_piR_032839	1	piRNA	mmu_piR_032839
mmu_piR_025209	2	piRNA	mmu_piR_025209
mmu_piR_030661	1	piRNA	mmu_piR_030661
mmu_piR_019561	1	piRNA	mmu_piR_019561
mmu-miR-29b-3p	3	hairpin	mir-29
mmu_piR_039194	3	piRNA	mmu_piR_039194
mmu_piR_015400	2	piRNA	mmu_piR_015400
mmu_piR_021340	1	piRNA	mmu_piR_021340
mmu-miR-378c	10	hairpin	undef
mmu-miR-103-2-5p	1	mature	mir-103
mmu-miR-181d-5p	76	mature	mir-181
mmu-miR-490-5p	2	hairpin	mir-490
mmu_piR_034524	1	piRNA	mmu_piR_034524
mmu_piR_026477	1	piRNA	mmu_piR_026477
mmu-miR-125b-5p	186	hairpin	mir-10
mmu_piR_000707	1	piRNA	mmu_piR_000707
mmu_piR_000933	1	piRNA	mmu_piR_000933
mmu-miR-1198-5p	2567	hairpin	undef
mmu_piR_039084	1	piRNA	mmu_piR_039084
mmu-miR-148b-3p	2	mature	mir-148
mmu-miR-505-3p	1	hairpin	mir-505
mmu_piR_036128	1	piRNA	mmu_piR_036128
mmu-miR-195a-5p	2	hairpin	mir-15
mmu-miR-201-5p	1	mature	mir-743
mmu-miR-124-3p	7	hairpin	mir-124
mmu_piR_020207	1	piRNA	mmu_piR_020207
mmu-miR-378a-5p	5	hairpin	mir-378
mmu-miR-3074-1-3p	2	hairpin	mir-3074
mmu-miR-151-5p	502	hairpin	mir-28
mmu-miR-374b-5p	6	hairpin	mir-374
mmu_piR_006838	2	piRNA	mmu_piR_006838
mmu-miR-351-5p	8	mature	mir-351
mmu-miR-122b-5p	8	hairpin	undef
mmu_piR_004185	1	piRNA	mmu_piR_004185
mmu_piR_015317	1	piRNA	mmu_piR_015317
mmu_piR_003867	1	piRNA	mmu_piR_003867
mmu-miR-7240-5p	2	mature	undef
mmu_piR_020544	1	piRNA	mmu_piR_020544
mmu_piR_008613	1	piRNA	mmu_piR_008613
mmu-miR-34b-3p	8	hairpin	mir-34
mmu_piR_000470	1	piRNA	mmu_piR_000470
mmu_piR_013408	1	piRNA	mmu_piR_013408
mmu_piR_024924	2	piRNA	mmu_piR_024924
mmu-miR-205-5p	20	mature	mir-205
mmu_piR_035903	1	piRNA	mmu_piR_035903
mmu-miR-183-5p	22	hairpin	mir-183
mmu_piR_024234	7	piRNA	mmu_piR_024234
mmu_piR_003172	1	piRNA	mmu_piR_003172
mmu-miR-3535	2	hairpin	mir-3535
mmu-miR-134-3p	6	hairpin	mir-134
mmu_piR_005839	1	piRNA	mmu_piR_005839
mmu-miR-7023-3p	1	hairpin	undef
mmu-miR-33-5p	17	mature	mir-33
mmu_piR_037820	2	piRNA	mmu_piR_037820
mmu-miR-218-1-3p	1	hairpin	mir-218
mmu-let-7j	8	hairpin	undef
mmu-miR-206-3p	68	hairpin	mir-1
mmu_piR_029417	1	piRNA	mmu_piR_029417
mmu_piR_014632	1	piRNA	mmu_piR_014632
mmu_piR_011673	1	piRNA	mmu_piR_011673
mmu-miR-210-5p	2	hairpin	mir-210
mmu_piR_028860	1	piRNA	mmu_piR_028860
mmu_piR_003960	2	piRNA	mmu_piR_003960
mmu-miR-487b-3p	2	hairpin	mir-154
mmu-miR-490-5p	40	mature	mir-490
mmu_piR_021986	1	piRNA	mmu_piR_021986
mmu-miR-219a-2-3p	36	mature	mir-219
mmu_piR_027343	6	piRNA	mmu_piR_027343
mmu-miR-7689-3p	2	mature	undef
mmu-miR-223-5p	11	hairpin	mir-223
mmu-miR-30d-3p	8	hairpin	mir-30
mmu-miR-6924-5p	2	hairpin	undef
mmu_piR_009385	1	piRNA	mmu_piR_009385
mmu-miR-150-5p	1037	mature	mir-150
mmu_piR_031064	1	piRNA	mmu_piR_031064
mmu-miR-1932	2	hairpin	undef
mmu_piR_027642	1	piRNA	mmu_piR_027642
mmu-miR-547-3p	1	mature	mir-547
mmu-miR-671-5p	9	mature	mir-671
mmu_piR_027218	1	piRNA	mmu_piR_027218
mmu_piR_019616	1	piRNA	mmu_piR_019616
mmu-miR-99b-3p	6	mature	mir-10
mmu-miR-191-3p	76	hairpin	mir-191
mmu_piR_020108	2	piRNA	mmu_piR_020108
mmu_piR_030475	1	piRNA	mmu_piR_030475
mmu_piR_000192	2	piRNA	mmu_piR_000192
mmu-miR-878-5p	2	hairpin	mir-878
mmu-miR-34c-3p	4	mature	mir-34
mmu-miR-409-3p	9	mature	mir-154
mmu-miR-465c-5p	1	mature	mir-465
mmu_piR_028779	1	piRNA	mmu_piR_028779
mmu_piR_025669	1	piRNA	mmu_piR_025669
mmu_piR_004919	1	piRNA	mmu_piR_004919
mmu-miR-6372	4	hairpin	undef
mmu-miR-7119-3p	7	hairpin	undef
mmu_piR_032974	1	piRNA	mmu_piR_032974
mmu-miR-6988-3p	7	hairpin	undef
mmu_piR_035157	1	piRNA	mmu_piR_035157
mmu_piR_002731	1	piRNA	mmu_piR_002731
mmu_piR_016688	3	piRNA	mmu_piR_016688
mmu-miR-410-5p	1	mature	mir-154
mmu-miR-203b-3p	1	hairpin	undef
mmu-miR-378a-5p	11	mature	mir-378
mmu_piR_037624	7	piRNA	mmu_piR_037624
mmu_piR_006880	1	piRNA	mmu_piR_006880
mmu_piR_013604	1	piRNA	mmu_piR_013604
mmu_piR_026223	1	piRNA	mmu_piR_026223
mmu-miR-8114	1	hairpin	undef
mmu_piR_038331	1	piRNA	mmu_piR_038331
mmu_piR_026547	1	piRNA	mmu_piR_026547
mmu_piR_038461	2	piRNA	mmu_piR_038461
mmu-miR-7655-3p	2	hairpin	undef
mmu-miR-6959-5p	2	mature	undef
mmu-miR-181c-5p	77	hairpin	mir-181
mmu_piR_025486	1	piRNA	mmu_piR_025486
mmu_piR_018323	6	piRNA	mmu_piR_018323
mmu_piR_003848	2	piRNA	mmu_piR_003848
mmu-miR-5104b-5p	4	mature	undef
mmu-miR-203b-5p	1	mature	undef
mmu-miR-222-5p	9	hairpin	mir-221
mmu_piR_036754	1	piRNA	mmu_piR_036754
mmu_piR_024799	88	piRNA	mmu_piR_024799
mmu_piR_033678	1	piRNA	mmu_piR_033678
mmu-miR-712-3p	2	mature	undef
mmu_piR_004901	1	piRNA	mmu_piR_004901
mmu-miR-126a-5p	6	mature	mir-126
mmu-miR-350-5p	1	mature	mir-350
mmu-miR-465a-3p,mmu-miR-465b-3p,mmu-miR-465c-3p	10	mature	mir-465
mmu_piR_037575	1	piRNA	mmu_piR_037575
mmu-miR-129-5p	4	mature	mir-129
mmu_piR_034559	1	piRNA	mmu_piR_034559
mmu-let-7c-5p	1675	mature	let-7
mmu-miR-378b	84	hairpin	mir-378
mmu-miR-1947-5p	4	mature	undef
mmu_piR_017040	1	piRNA	mmu_piR_017040
mmu_piR_039809	1	piRNA	mmu_piR_039809
mmu_piR_011693	2	piRNA	mmu_piR_011693
mmu_piR_000695	1	piRNA	mmu_piR_000695
mmu_piR_011324	1	piRNA	mmu_piR_011324
mmu_piR_000819	1	piRNA	mmu_piR_000819
mmu_piR_005267	2	piRNA	mmu_piR_005267
mmu-miR-192-3p	1	hairpin	mir-192
mmu_piR_025512	1	piRNA	mmu_piR_025512
mmu_piR_005717	1	piRNA	mmu_piR_005717
mmu_piR_039970	1	piRNA	mmu_piR_039970
mmu_piR_030780	1	piRNA	mmu_piR_030780
mmu_piR_001840	1	piRNA	mmu_piR_001840
mmu_piR_033098	1	piRNA	mmu_piR_033098
mmu_piR_004448	1	piRNA	mmu_piR_004448
mmu_piR_026173	2	piRNA	mmu_piR_026173
mmu-miR-191-5p	7475	mature	mir-191
mmu-miR-615-5p	1	hairpin	mir-615
mmu_piR_023963	12	piRNA	mmu_piR_023963
mmu-miR-339-3p	11	hairpin	mir-339
mmu-miR-34c-3p	9	hairpin	mir-34
mmu-miR-142a-5p	8	mature	mir-142
mmu-miR-503-3p	30	hairpin	mir-503
mmu-miR-378a-3p	2391	hairpin	mir-378
mmu_piR_039010	1	piRNA	mmu_piR_039010
mmu_piR_019047	5	piRNA	mmu_piR_019047
mmu-miR-29b-3p	2	mature	mir-29
mmu-miR-34b-5p	1	hairpin	mir-34
mmu_piR_000512	2	piRNA	mmu_piR_000512
mmu-miR-298-5p	1	hairpin	mir-298
mmu-miR-20a-5p	36	hairpin	mir-17
mmu_piR_017671	1	piRNA	mmu_piR_017671
mmu-miR-18a-3p	13	mature	mir-17
RF00051	10	precursor	mir-17 microRNA precursor family
RF00047	1425	precursor	mir-2 microRNA precursor
RF01144	7	snoRNA	Small nucleolar RNA sR17
RF02475	6	snoRNA	Small nucleolar RNA GlsR6
RF01052	1	Rfam other sncRNA	Arthropod 7SK RNA
RF01524	1	snoRNA	Trypanosomatid snoRNA TB10cs1H3
RF02304	1	snoRNA	Tetrahymena snoRNA TtnuCD29
RF01335	5	Rfam other sncRNA	CRISPR RNA direct repeat element
RF00608	6	snoRNA	Small nucleolar RNA SNORD99
RF01118	66	rRNA	Pseudoknot of the domain G(G12) of 23S ribosomal RNA
RF00496	4	Rfam other sncRNA	Coronavirus SL-III cis-acting replication element (CRE)
RF01768	4	Rfam other sncRNA	ribosomal frameshift site
RF00658	92	precursor	microRNA mir-21
RF01933	3	Rfam other sncRNA	Bithoraxoid conserved region 5
RF02517	4	precursor	mir-1017 microRNA precursor family
RF00067	1	snoRNA	Small nucleolar RNA SNORD15
RF01646	2	snoRNA	Caenorhabditis snoRNA ceN63
RF01141	1	snoRNA	Small nucleolar RNA sR18
RF02375	1	Rfam other sncRNA	Aar sRNA
RF00752	113	precursor	microRNA mir-14
RF01833	13	Rfam other sncRNA	ribosomal frameshift site
RF00003	646	snRNA	U1 spliceosomal RNA
RF00604	3	snoRNA	Small nucleolar RNA SNORD88
RF00375	726	Rfam other sncRNA	HIV primer binding site (PBS)
RF00071	8	snoRNA	Small nucleolar RNA SNORD73
RF00844	5	precursor	microRNA mir-67
RF02236	1	Rfam other sncRNA	Xanthomonas sRNA asX2
RF02182	22	Rfam other sncRNA	ST7 antisense RNA 2 conserved region 2
RF00441	18	snoRNA	Small nucleolar RNA Z242
RF00706	1	precursor	microRNA mir-263
RF01687	7	Rfam other sncRNA	Acido-Lenti-1 RNA
RF00891	2	precursor	microRNA mir-671
RF00431	7	snoRNA	Small nucleolar RNA SNORA55
RF00912	11	precursor	microRNA mir-877
RF01559	3	snoRNA	Dictyostelium snoRNA DdR1
RF00674	22	precursor	microRNA mir-187
RF00677	28	precursor	microRNA MIR168
RF01541	1	snoRNA	Trypanosomatid snoRNA TB11Cs4H3
RF00657	31	precursor	microRNA mir-184
RF01673	2	Rfam other sncRNA	PhrS
RF00511	1	Rfam other sncRNA	Kaposi's sarcoma-associated herpesvirus internal ribosome entry site
RF00249	231	precursor	mir-46/mir-47/mir-281 microRNA precursor family
RF00593	2	snoRNA	Small nucleolar RNA U83B
RF00647	10	precursor	microRNA MIR164
RF00133	2	snoRNA	Small nucleolar RNA Z195/SNORD33/SNORD32 family
RF01852	167	tRNA	Selenocysteine transfer RNA
RF01707	51	Rfam other sncRNA	JUMPstart RNA
RF00717	2	precursor	microRNA mir-315
RF00217	59	snoRNA	Small nucleolar RNA SNORD20
RF00180	25	Rfam other sncRNA	Renin stability regulatory element (REN-SRE)
RF00022	1	Rfam other sncRNA	GcvB RNA
RF00231	2	snoRNA	Small Cajal body specific RNA 13
RF01124	2	snoRNA	Small nucleolar RNA sR36
RF00568	1	snoRNA	Small nucleolar RNA SNORA26
RF02224	3	Rfam other sncRNA	Xanthomonadaceae sRNA sX5
RF01959	43	rRNA	Archaeal small subunit ribosomal RNA
RF00560	14	snoRNA	Small nucleolar RNA SNORA17
RF01985	1	Rfam other sncRNA	ZEB2 antisense RNA 1 conserved region 2
RF01351	3	Rfam other sncRNA	CRISPR RNA direct repeat element
RF02416	1	Rfam other sncRNA	Turnip crinkle virus 3'UTR
RF00472	1	snoRNA	Small nucleolar RNA snR55/Z10
RF01346	13	Rfam other sncRNA	CRISPR RNA direct repeat element
RF01130	1	snoRNA	Small nucleolar RNA sR46
RF00075	86	precursor	mir-166 microRNA precursor
RF02359	12	Rfam other sncRNA	Bacteriophage MS2 operator hairpin
RF01303	1	snoRNA	Small nucleolar RNA sR49
RF01535	1	snoRNA	Trypanosomatid snoRNA TB10Cs5H2
RF00700	1658	precursor	microRNA mir-375
RF00783	52	precursor	microRNA mir-484
RF00757	38	precursor	microRNA mir-275
RF00695	80	precursor	microRNA MIR398
RF00932	1	precursor	microRNA mir-471
RF00500	13	Rfam other sncRNA	Turnip crinkle virus (TCV) repressor of minus strand synthesis H5
RF00563	3	snoRNA	Small nucleolar RNA SNORA53
RF02300	2	snoRNA	Tetrahymena snoRNA TtnuCD24
RF00936	1	precursor	microRNA mir-744
RF01356	1	Rfam other sncRNA	CRISPR RNA direct repeat element
RF00287	1	snoRNA	Small nucleolar RNA SNORD44
RF02107	1	Rfam other sncRNA	Deleted in lymphocytic leukemia 2 conserved region 3
RF00175	2	Rfam other sncRNA	Human immunodeficiency virus type 1 dimerisation initiation site
RF00679	20	precursor	microRNA mir-210
RF00662	200	precursor	microRNA mir-132
RF00076	1212	precursor	mir-181 microRNA precursor
RF02050	2	Rfam other sncRNA	Salmonella enterica sRNA STnc470
RF02223	3	Rfam other sncRNA	Proteobacterial sRNA sX4
RF00732	1	precursor	microRNA mir-305
RF01111	2	Rfam other sncRNA	Pseudoknot of upstream pseudoknot domain (UPD) of the 3'UTR
RF00409	5	snoRNA	Small nucleolar RNA SNORA7
RF00619	6	snRNA	U6atac minor spliceosomal RNA
RF02162	2	Rfam other sncRNA	XIST RNA A repeat
RF01844	2	snRNA	SmY spliceosomal RNA
RF00522	3	Rfam other sncRNA	PreQ1 riboswitch
RF00646	8	precursor	microRNA mir-204
RF01327	5	Rfam other sncRNA	CRISPR RNA direct repeat element
RF00001	4352	rRNA	5S ribosomal RNA
RF01256	1	snoRNA	Small nucleolar RNA snR43
RF01566	2	snoRNA	Dictyostelium snoRNA DdR16
RF00414	1	snoRNA	Small nucleolar RNA SNORA22
RF02194	68	Rfam other sncRNA	Bacterial antisense RNA HPnc0260
RF01704	4	Rfam other sncRNA	Downstream peptide RNA
RF02543	12053	rRNA	Eukaryotic large subunit ribosomal RNA
RF00767	1	precursor	microRNA mir-150
RF00382	1	Rfam other sncRNA	DnaX ribosomal frameshifting element
RF00678	1	precursor	microRNA mir-140
RF00649	486	precursor	microRNA mir-128
RF02273	3	Rfam other sncRNA	FsrA
RF02400	2	Rfam other sncRNA	Heat shock protein 83 3' UTR
RF00724	21	precursor	microRNA mir-282
RF00426	1	snoRNA	Small Cajal body specific RNA 15
RF00195	4	Rfam other sncRNA	RsmY RNA family
RF00100	15	Rfam other sncRNA	7SK RNA
RF00245	123	precursor	mir-19 microRNA precursor family
RF01677	10	Rfam other sncRNA	Pseudomonas sRNA P35
RF00192	1	Rfam other sncRNA	Bovine leukaemia virus RNA packaging signal
RF00177	937	rRNA	Bacterial small subunit ribosomal RNA
RF00575	1	snoRNA	Small nucleolar RNA SNORD70
RF01196	6	snoRNA	Small nucleolar RNA Z30a
RF01851	10	Rfam other sncRNA	Cyanobacteria transfer-messenger RNA
RF00711	1692	precursor	microRNA mir-449
RF00586	9	snoRNA	Small nucleolar RNA SNORA12
RF00919	11	precursor	microRNA mir-874
RF00004	13	snRNA	U2 spliceosomal RNA
RF01021	1	precursor	microRNA mir-558
RF01022	8	precursor	microRNA mir-611
RF01716	358	Rfam other sncRNA	PhotoRC-I RNA
RF00460	1	Rfam other sncRNA	U1A polyadenylation inhibition element (PIE)
RF00284	2	snoRNA	Small nucleolar RNA SNORD74
RF00653	8	precursor	microRNA mir-22
RF01185	1	snoRNA	Small nucleolar RNA snR75
RF02278	1	Rfam other sncRNA	Betaproteobacteria toxic small RNA
RF01274	1	snoRNA	Small nucleolar RNA sR45
RF01849	6	Rfam other sncRNA	Alphaproteobacteria transfer-messenger RNA
RF02540	70	rRNA	Archaeal large subunit ribosomal RNA
RF01120	5	snoRNA	Small nucleolar RNA sR33
RF02119	3	Rfam other sncRNA	FTX transcript, XIST regulator conserved region 1
RF01295	180	snoRNA	Small Cajal body-specific RNA 7
RF00053	564	precursor	mir-7 microRNA precursor
RF01753	70	Rfam other sncRNA	psbNH RNA
RF00216	4	Rfam other sncRNA	c-myc internal ribosome entry site (IRES)
RF00173	4	Rfam other sncRNA	Hairpin ribozyme
RF01886	3	Rfam other sncRNA	Heat shock gene hsromega conserved region 2
RF01068	3	Rfam other sncRNA	mini-ykkC RNA motif
RF00675	1	precursor	microRNA mir-145
RF00144	17	precursor	mir-199 microRNA precursor
RF01634	1	snoRNA	Caenorhabditis snoRNA ceN44
RF01306	24	snoRNA	Small nucleolar RNA sR52
RF00289	2	snoRNA	Small nucleolar RNA SNORD104
RF00282	13	snoRNA	Small nucleolar RNA SNORD48
RF00459	13	Rfam other sncRNA	Mason-Pfizer monkey virus packaging signal
RF01139	11	snoRNA	Small nucleolar RNA sR2
RF00690	2	precursor	microRNA MIR408
RF01135	20	snoRNA	Small nucleolar RNA sR24
RF00637	2061	precursor	microRNA mir-276
RF00032	2	Rfam other sncRNA	Histone 3' UTR stem-loop
RF00865	2	precursor	microRNA MIR169_5
RF00760	1	precursor	microRNA mir-342
RF00010	2	Rfam other sncRNA	Bacterial RNase P class A
RF01074	4	Rfam other sncRNA	Putative RNA-dependent RNA polymerase ribosomal frameshift site
RF00052	44	precursor	lin-4 microRNA precursor
RF01668	2	Rfam other sncRNA	Pseudomonas sRNA P10
RF01952	1	Rfam other sncRNA	SOX2 overlapping transcript exon 2
RF00257	199	precursor	mir-194 microRNA precursor family
RF01811	1	Rfam other sncRNA	Plasmid transferred anti-sense RNA
RF00381	1	Rfam other sncRNA	Antizyme RNA frameshifting stimulation element
RF01867	9	Rfam other sncRNA	caulobacter sRNA CC2171
RF02158	3	Rfam other sncRNA	NPPA antisense RNA 1 conserved region 3
RF00455	1	precursor	mir-15 microRNA precursor family
RF00486	5	precursor	mir-129 microRNA precursor family
RF02553	325	Rfam other sncRNA	Y RNA-like
RF02186	3	Rfam other sncRNA	ST7 overlapping transcript 3 conserved region 4
RF00671	4	precursor	microRNA mir-138
RF00467	8	Rfam other sncRNA	Rous sarcoma virus (RSV) primer binding site (PBS)
RF02060	1	Rfam other sncRNA	Enterobacterial sRNA STnc410
RF02181	2	Rfam other sncRNA	ST7 antisense RNA 2 conserved region 1
RF02347	1	Rfam other sncRNA	Alphaproteobacterial sRNA ar45
RF01929	3	Rfam other sncRNA	Bithoraxoid conserved region 1
RF01330	6	Rfam other sncRNA	CRISPR RNA direct repeat element
RF01015	2	precursor	microRNA mir-885
RF00689	1	precursor	microRNA MIR390
RF01533	1	snoRNA	Trypanosomatid snoRNA TB10Cs4H3
RF00715	1	precursor	microRNA mir-383
RF00644	5532	precursor	microRNA mir-27
RF01159	1	snoRNA	Small nucleolar RNA U18
RF01904	9	Rfam other sncRNA	HOTAIR conserved region 1
RF00104	286	precursor	mir-10 microRNA precursor family
RF02221	1	Rfam other sncRNA	sRNA-Xcc1
RF00251	12	precursor	mir-219 microRNA precursor family
RF00045	2	snoRNA	Small nucleolar RNA SNORA73 family
RF01151	5	snoRNA	Small nucleolar RNA U82P
RF01960	60838	rRNA	Eukaryotic small subunit ribosomal RNA
RF02171	2	Rfam other sncRNA	RFPL3 antisense RNA 1 conserved region 1
RF01309	4	snoRNA	Small nucleolar RNA sR60
RF00223	2	Rfam other sncRNA	bip internal ribosome entry site (IRES)
RF01131	4	snoRNA	Small nucleolar RNA sR47
RF00017	191	Rfam other sncRNA	Metazoan signal recognition particle RNA
RF02308	1	snoRNA	Tetrahymena snoRNA TtnuCD34
RF00377	5	snoRNA	Small nucleolar RNA U6-53/MBII-28
RF01232	11	snoRNA	Small nucleolar RNA R442
RF01642	1	snoRNA	Caenorhabditis snoRNA ceN54
RF01506	5	snoRNA	A. fumigatus snoRNA Afu_294
RF01942	5820	precursor	microRNA mir-1937
RF00727	22	precursor	microRNA bantam
RF00184	4	Rfam other sncRNA	Potato virus X cis-acting regulatory element
RF01382	99	Rfam other sncRNA	HIV-1 stem-loop 4 packaging signal
RF01006	2	precursor	microRNA mir-601
RF00703	26	precursor	microRNA mir-139
RF02126	1	Rfam other sncRNA	Ghrelin opposite strand RNA conserved region
RF00295	1	snoRNA	Small nucleolar RNA TBR7
RF00241	1538	precursor	mir-8/mir-141/mir-200 microRNA precursor family
RF02510	1	Rfam other sncRNA	Pyrrolysine insertion sequence mttB
RF01788	1	Rfam other sncRNA	drz-agam-2-2 riboswitch
RF01914	1	precursor	microRNA mir-932
RF01184	11	snoRNA	Small nucleolar RNA snR79
RF00278	125	snoRNA	Small nucleolar RNA SNORD50
RF01304	23	snoRNA	Small nucleolar RNA sR5
RF01109	3	Rfam other sncRNA	Pseudoknot of upstream pseudoknot domain (UPD) of the 3'UTR
RF01340	3	Rfam other sncRNA	CRISPR RNA direct repeat element
RF01133	1	snoRNA	Small nucleolar RNA sR3
RF00131	732	precursor	mir-30 microRNA precursor
RF00702	60	precursor	microRNA mir-182
RF01854	2	Rfam other sncRNA	Bacterial large signal recognition particle RNA
RF02509	6	Rfam other sncRNA	Pyrrolysine insertion sequence mtbB
RF00571	4	snoRNA	Small nucleolar RNA SNORD65
RF01365	1	Rfam other sncRNA	CRISPR RNA direct repeat element
RF00489	5	Rfam other sncRNA	ctRNA
RF01114	5	Rfam other sncRNA	Pseudoknot of upstream pseudoknot domain (UPD) of the 3'UTR
RF00478	1	snoRNA	Small Cajal body specific RNA 6
RF00221	5	snoRNA	Small nucleolar RNA SNORD43
RF00640	8	precursor	microRNA MIR167_1
RF00638	17	precursor	microRNA MIR159
RF01322	14	Rfam other sncRNA	CRISPR RNA direct repeat element
RF01549	3	snoRNA	Trypanosomatid snoRNA TB8Cs2H1
RF00661	40	precursor	microRNA mir-31
RF00784	400	precursor	microRNA mir-486
RF02225	1	Rfam other sncRNA	Proteobacterial sRNA sX6
RF00254	450	precursor	mir-16 microRNA precursor family
RF00037	29	Rfam other sncRNA	Iron response element I
RF01850	258	Rfam other sncRNA	Betaproteobacteria transfer-messenger RNA
RF00016	12	snoRNA	Small nucleolar RNA SNORD14
RF00237	13	precursor	mir-9/mir-79 microRNA precursor family
RF01792	30	Rfam other sncRNA	ribosomal frameshift site
RF02129	9	Rfam other sncRNA	GNAS antisense RNA 1 conserved region 3
RF01675	183	Rfam other sncRNA	Pseudomonas sRNA CrcZ
RF01152	4	snoRNA	Small nucleolar RNA sR1
RF00244	72	precursor	mir-26 microRNA precursor family
RF00506	1	Rfam other sncRNA	Threonine operon leader
RF01762	8	Rfam other sncRNA	Whalefall-1 RNA
RF00005	664944	tRNA	tRNA
RF02248	11	Rfam other sncRNA	Six3os1 conserved region 3
RF00691	331	precursor	microRNA mir-146
RF01072	16	Rfam other sncRNA	Pseudoknot of upstream pseudoknot domain (UPD) of the 3'UTR
RF02519	3	Rfam other sncRNA	ToxI antitoxin
RF02261	2	Rfam other sncRNA	MAT2A 3'UTR stem loop B
RF01836	1	Rfam other sncRNA	ribosomal frameshift site
RF00443	2	snoRNA	Small nucleolar RNA SNORA27
RF01081	4	Rfam other sncRNA	Pseudoknot of upstream pseudoknot domain (UPD) of the 3'UTR
RF00565	3	snoRNA	Small Cajal body specific RNA 3
RF01339	4	Rfam other sncRNA	CRISPR RNA direct repeat element
RF00735	3	precursor	microRNA mir-367
RF00309	2	snoRNA	Small nucleolar RNA snR60/Z15/Z230/Z193/J17
RF00011	1	Rfam other sncRNA	Bacterial RNase P class B
RF00442	3	Rfam other sncRNA	ykkC-yxkD leader
RF00424	9	snoRNA	Small Cajal body specific RNA 16
RF00027	116	precursor	let-7 microRNA precursor
RF00664	56	precursor	microRNA mir-223
RF00476	5	snoRNA	Small nucleolar RNA snR61/Z1/Z11
RF00129	24	precursor	mir-103/107 microRNA precursor
RF01338	1	Rfam other sncRNA	CRISPR RNA direct repeat element
RF01519	1	Rfam other sncRNA	Caulobacter sRNA CC0196
RF00165	8	Rfam other sncRNA	Coronavirus 3' UTR pseudoknot
RF00396	12	snoRNA	Small nucleolar RNA SNORA13
RF00247	2	precursor	mir-160 microRNA precursor family
RF01641	1	snoRNA	Caenorhabditis snoRNA ceN53
RF00871	65	precursor	microRNA mir-689
RF00838	80	precursor	microRNA mir-252
RF00648	6	precursor	microRNA MIR396
RF00630	1	Rfam other sncRNA	Pseudomonas sRNA P26
RF01756	5	Rfam other sncRNA	rne-II RNA
RF02183	8	Rfam other sncRNA	ST7 overlapping transcript 3 conserved region 1
RF02098	1	Rfam other sncRNA	DiGeorge syndrome critical region gene 5 conserved region
RF01341	1	Rfam other sncRNA	CRISPR RNA direct repeat element
RF02280	2	snoRNA	Tetrahymena snoRNA TtnuCD3
RF01275	5	snoRNA	Small nucleolar RNA sR22
RF01684	283277	Rfam other sncRNA	MALAT1-associated small cytoplasmic RNA/MEN beta RNA
RF00645	60	precursor	microRNA MIR169_2
RF00009	4	Rfam other sncRNA	Nuclear RNase P
RF00946	7	precursor	microRNA mir-1225
RF00390	1	Rfam other sncRNA	UPSK RNA
RF01972	4	Rfam other sncRNA	H19 conserved region 1
RF00187	3	snoRNA	Small nucleolar RNA SNORD102
RF00918	1	precursor	microRNA mir-872
RF00683	7	precursor	microRNA mir-143
RF01373	1	Rfam other sncRNA	CRISPR RNA direct repeat element
RF02541	4830	rRNA	Bacterial large subunit ribosomal RNA
RF01136	3	snoRNA	Small nucleolar RNA sR28
RF01290	2	snoRNA	Small nucleolar RNA SNORD10
RF01125	5	snoRNA	Small nucleolar RNA sR4
RF02470	1	Rfam other sncRNA	Mycobacterium sRNA Ms_IGR-8
RF02262	2	Rfam other sncRNA	MAT2A 3'UTR stem loop C
RF00103	5	precursor	mir-1 microRNA precursor family
RF00093	4	snoRNA	Small nucleolar RNA SNORD18
RF00722	7759	precursor	microRNA mir-451
RF00069	1	snoRNA	Small nucleolar RNA SNORD24
RF00669	14	precursor	microRNA mir-96
RF00140	1	Rfam other sncRNA	Alpha operon ribosome binding site
RF01126	1	snoRNA	Small nucleolar RNA sR41
RF02444	3	Rfam other sncRNA	Streptococcus sRNA SpR10
RF01494	2	Rfam other sncRNA	Listeria sRNA rliD
RF01260	3	snoRNA	Small nucleolar RNA snR11
RF01381	22	Rfam other sncRNA	HIV-1 stem-loop 3 Psi packaging signal
RF01872	1	Rfam other sncRNA	Maternally expressed 3 conserved region 2
RF02448	11	Rfam other sncRNA	Streptococcus sRNA SpR20
RF01161	11	snoRNA	Small nucleolar RNA SNORD5
RF01895	42	precursor	microRNA mir-193
RF01834	6	Rfam other sncRNA	ribosomal frameshift site
RF01727	1	Rfam other sncRNA	SAM/SAH riboswitch
RF01360	4	Rfam other sncRNA	CRISPR RNA direct repeat element
RF00253	16	precursor	mir-101 microRNA precursor family
RF00803	9	precursor	microRNA mir-425
RF01987	1	Rfam other sncRNA	ZEB2 antisense RNA 1 conserved region 4
RF00741	546	precursor	microRNA mir-378
RF01142	1	snoRNA	Small nucleolar RNA sR19
RF02281	1	snoRNA	Tetrahymena snoRNA TtnuCD4
RF02538	1	Rfam other sncRNA	Vibrio ToxT activated RNA TarB
RF00573	3	snoRNA	Small nucleolar RNA SNORD67
RF00012	376	snoRNA	Small nucleolar RNA U3
RF00015	14	snRNA	U4 spliceosomal RNA
RF00446	212	precursor	mir-133 microRNA precursor family
RF00428	2	snoRNA	Small nucleolar RNA SNORA38
RF01935	1	Rfam other sncRNA	Bithoraxoid conserved region 7
RF02085	5	Rfam other sncRNA	Yellow-achaete intergenic RNA conserved region 1
RF00613	1	snoRNA	Small nucleolar RNA SNORD94
RF01134	3	snoRNA	Small nucleolar RNA sR30
RF00651	931	precursor	microRNA mir-221
RF01014	16	precursor	microRNA mir-1306
RF00002	59916	rRNA	5.8S ribosomal RNA
RF00110	1	Rfam other sncRNA	RybB RNA
RF00548	47	snRNA	U11 spliceosomal RNA
RF00211	4	snoRNA	Small nucleolar RNA SNORD35
RF00643	1	precursor	microRNA MIR171_1
RF00358	7	snoRNA	Small nucleolar RNA Z101
RF00019	2109	Rfam other sncRNA	Y RNA
RF00066	206	snRNA	U7 small nuclear RNA
RF00080	1	Rfam other sncRNA	yybP-ykoY leader
RF02479	1	snoRNA	Small nucleolar RNA GlsR13
RF01321	1	Rfam other sncRNA	CRISPR RNA direct repeat element
RF01317	2	Rfam other sncRNA	CRISPR RNA direct repeat element
RF00006	721	Rfam other sncRNA	Vault RNA
RF01181	2	snoRNA	Small nucleolar RNA snR77
RF00580	1	snoRNA	Small nucleolar RNA SNORD91 family
RF01337	4	Rfam other sncRNA	CRISPR RNA direct repeat element
RF01846	2	snoRNA	Fungal small nucleolar RNA U3
RF00279	1	snoRNA	Small nucleolar RNA SNORD45
RF00178	1731	precursor	mir-24 microRNA precursor family
RF01294	3	snoRNA	Small nucleolar RNA U89
RF00274	5	snoRNA	Small nucleolar RNA SNORD57
RF01890	2	Rfam other sncRNA	LincRNA-p21 conserved region 2
RF01100	5	Rfam other sncRNA	3'-terminal pseudoknot in BYV
RF00832	83	precursor	microRNA mir-71
RF00130	8414	precursor	mir-192/215 microRNA precursor
RF00074	985	precursor	mir-29 microRNA precursor
[truncated: 52 more rows]
