# Supplementary material for: MicroRNAs Involved in the Therapeutic Functions of Noni (Morinda citrifolia L.) Fruit Juice in the Treatment of Acute Gouty Arthritis in Mice Induced with Monosodium Urate
Source: Foods. 2021 Jul 15;10(7):1638. doi: 10.3390/foods10071638 (PMC8308103; doi:10.3390/foods10071638)
Supplement: Supplementary file 1 [file foods-10-01638-s001.zip › Table S2.xlsx]

## Sheet: Normal control group
sRNA id	Count(24540013)	Type	Description	TPM
mmu-miR-1843a-5p	22	mature	mir-1843	0.9
mmu-miR-378a-3p	1066	mature	mir-378	43.44
mmu-miR-130a-3p	248	mature	mir-130	10.11
mmu-miR-5620-5p	1	mature	undef	0.04
mmu-miR-17-5p	103	mature	mir-17	4.2
mmu-miR-28a-3p	58	mature	mir-28	2.36
mmu-miR-485-5p	37	mature	mir-485	1.51
mmu-miR-215-5p	605	mature	mir-192	24.65
mmu-miR-375-3p	4474	mature	mir-375	182.31
mmu-miR-6967-3p	2	mature	mir-6967	0.08
mmu-miR-379-5p	68	mature	mir-379	2.77
mmu-miR-9b-3p	1408	mature	undef	57.38
mmu-miR-199a-3p,mmu-miR-199b-3p	26	mature	mir-199	1.06
mmu-miR-467a-3p	21	mature	mir-467	0.86
mmu-let-7f-5p	4089	mature	let-7	166.63
mmu-miR-350-3p	267	mature	mir-350	10.88
mmu-miR-542-5p	103	mature	mir-542	4.2
mmu-miR-429-3p	638	mature	mir-8	26
mmu-miR-10b-5p	516	mature	mir-10	21.03
mmu-miR-487b-3p	26	mature	mir-154	1.06
mmu-miR-484	2157	mature	mir-484	87.9
mmu-miR-224-5p	77	mature	mir-224	3.14
mmu-miR-9-3p	39	mature	mir-9	1.59
mmu-miR-184-3p	82	mature	mir-184	3.34
mmu-miR-470-5p	13	mature	mir-743	0.53
mmu-miR-181d-3p	3	mature	mir-181	0.12
mmu-miR-15a-3p	18	mature	mir-15	0.73
mmu-miR-221-3p	30	mature	mir-221	1.22
mmu-miR-20a-5p	159	mature	mir-17	6.48
mmu-miR-8116	54	mature	undef	2.2
mmu-miR-1839-5p	544	mature	mir-1839	22.17
mmu-miR-672-3p	1	mature	mir-672	0.04
mmu-miR-449a-5p	180	mature	mir-449	7.33
mmu-miR-139-3p	24	mature	mir-139	0.98
mmu-miR-433-3p	2	mature	mir-433	0.08
mmu-miR-669a-5p,mmu-miR-669p-5p	13	mature	mir-467	0.53
mmu-miR-215-3p	97	mature	mir-192	3.95
mmu-miR-34a-5p	690	mature	mir-34	28.12
mmu-miR-1a-3p	116	mature	mir-1	4.73
mmu-miR-741-3p	1	mature	undef	0.04
mmu-miR-211-5p	2	mature	mir-204	0.08
mmu-miR-93-5p	2552	mature	mir-17	103.99
mmu-miR-324-3p	1	mature	mir-324	0.04
mmu-miR-339-3p	54	mature	mir-339	2.2
mmu-miR-151-3p	180	mature	mir-28	7.33
mmu-miR-183-5p	79	mature	mir-183	3.22
mmu-miR-301a-3p	174	mature	mir-130	7.09
mmu-miR-486a-3p	334	mature	mir-486	13.61
mmu-miR-5114	27	mature	undef	1.1
mmu-miR-297a-5p	11	mature	mir-297	0.45
mmu-miR-335-5p	38	mature	mir-335	1.55
mmu-miR-7052-3p	43	mature	undef	1.75
mmu-miR-495-3p	1	mature	mir-329	0.04
mmu-miR-425-5p	147	mature	mir-425	5.99
mmu-miR-130b-3p	223	mature	mir-130	9.09
mmu-miR-127-3p	393	mature	mir-127	16.01
mmu-miR-195a-5p	31	mature	mir-15	1.26
mmu-let-7d-3p	3651	mature	let-7	148.78
mmu-miR-30b-5p	1170	mature	mir-30	47.68
mmu-miR-141-3p	98	mature	mir-8	3.99
mmu-miR-6914-3p	25	mature	undef	1.02
mmu-miR-21a-5p	5831	mature	mir-21	237.61
mmu-let-7d-5p	1527	mature	let-7	62.22
mmu-miR-23b-3p	6	mature	mir-23	0.24
mmu-miR-98-5p	333	mature	let-7	13.57
mmu-miR-24-2-5p	106	mature	mir-24	4.32
mmu-miR-411-5p	42	mature	mir-379	1.71
mmu-miR-12192-5p	36	mature	undef	1.47
mmu-miR-124-3p	35	mature	mir-124	1.43
mmu-miR-106b-5p	178	mature	mir-17	7.25
mmu-miR-466i-5p	92	mature	mir-467	3.75
mmu-miR-92b-3p	731	mature	mir-25	29.79
mmu-miR-203b-3p	43	mature	undef	1.75
mmu-let-7i-5p	10887	mature	let-7	443.64
mmu-miR-27a-3p	16108	mature	mir-27	656.4
mmu-miR-181c-5p	431	mature	mir-181	17.56
mmu-miR-22-3p	6905	mature	mir-22	281.38
mmu-miR-465b-5p	3	mature	mir-465	0.12
mmu-miR-212-3p	78	mature	mir-132	3.18
mmu-miR-451a	100927	mature	mir-451	4112.75
mmu-miR-206-3p	792	mature	mir-1	32.27
mmu-miR-346-5p	3	mature	mir-346	0.12
mmu-miR-182-5p	1	mature	mir-182	0.04
mmu-miR-871-5p	3	mature	mir-743	0.12
mmu-miR-338-5p	1	mature	mir-338	0.04
mmu-miR-19a-3p	29	mature	mir-19	1.18
mmu-miR-30a-3p	33	mature	mir-30	1.34
mmu-miR-154-5p	564	mature	mir-154	22.98
mmu-miR-7a-5p	383	mature	mir-7	15.61
mmu-miR-877-3p	41	mature	mir-877	1.67
mmu-miR-99a-5p	5670	mature	mir-10	231.05
mmu-miR-7051-5p	26	mature	undef	1.06
mmu-miR-1249-3p	22	mature	mir-1249	0.9
mmu-miR-1b-5p	3	mature	mir-1	0.12
mmu-miR-450a-5p	24	mature	mir-450	0.98
mmu-miR-145a-3p	40	mature	mir-145	1.63
mmu-miR-574-5p	44	mature	mir-574	1.79
mmu-miR-434-3p	97	mature	mir-434	3.95
mmu-miR-3084-5p	35	mature	mir-3084	1.43
mmu-miR-1843b-3p	92	mature	mir-1843	3.75
mmu-miR-532-3p	16	mature	mir-188	0.65
mmu-miR-463-5p	2	mature	mir-463	0.08
mmu-miR-140-5p	295	mature	mir-140	12.02
mmu-miR-3074-2-3p	124	mature	mir-3074	5.05
mmu-let-7f-2-3p	101	mature	let-7	4.12
mmu-miR-1191a	2	mature	undef	0.08
mmu-miR-423-5p	753	mature	mir-423	30.68
mmu-miR-30d-5p	2957	mature	mir-30	120.5
mmu-miR-320-3p	1037	mature	mir-320	42.26
mmu-miR-223-3p	611	mature	mir-223	24.9
mmu-miR-34b-3p	61	mature	mir-34	2.49
mmu-let-7a-1-3p,mmu-let-7c-2-3p	83	mature	let-7	3.38
mmu-miR-196b-5p	989	mature	mir-196	40.3
mmu-miR-30e-5p	30	mature	mir-30	1.22
mmu-miR-187-3p	33	mature	mir-187	1.34
mmu-let-7e-3p	4	mature	let-7	0.16
mmu-miR-125a-5p	2	mature	mir-10	0.08
mmu-miR-7091-3p	40	mature	undef	1.63
mmu-miR-3572-3p	2	mature	mir-3572	0.08
mmu-miR-138-5p	189	mature	mir-138	7.7
mmu-miR-30c-5p	2	mature	mir-30	0.08
mmu-miR-193b-3p	874	mature	mir-193	35.62
mmu-miR-181a-1-3p	1	mature	mir-181	0.04
mmu-miR-139-5p	2123	mature	mir-139	86.51
mmu-miR-880-3p	3	mature	mir-880	0.12
mmu-miR-125b-5p	52	mature	mir-10	2.12
mmu-let-7i-3p	20	mature	let-7	0.81
mmu-miR-1964-3p	59	mature	undef	2.4
mmu-miR-877-5p	33	mature	mir-877	1.34
mmu-miR-3072-3p	1	mature	mir-3072	0.04
mmu-miR-374b-5p	297	mature	mir-374	12.1
mmu-miR-191-3p	34	mature	mir-191	1.39
mmu-miR-26a-5p	2359	mature	mir-26	96.13
mmu-miR-16-5p	22299	mature	mir-15	908.68
mmu-miR-218-5p	163	mature	mir-218	6.64
mmu-miR-143-3p	988	mature	mir-143	40.26
mmu-miR-505-5p	1	mature	mir-505	0.04
mmu-miR-101b-3p	55	mature	mir-101	2.24
mmu-miR-185-5p	374	mature	mir-185	15.24
mmu-miR-15b-5p	123	mature	mir-15	5.01
mmu-miR-138-2-3p	4	mature	mir-138	0.16
mmu-miR-615-3p	25	mature	mir-615	1.02
mmu-miR-423-3p	1418	mature	mir-423	57.78
mmu-miR-194-5p	38	mature	mir-194	1.55
mmu-miR-501-3p	63	mature	mir-500	2.57
mmu-miR-181b-5p	1	mature	mir-181	0.04
mmu-miR-8112	703	mature	undef	28.65
mmu-miR-138-1-3p	34	mature	mir-138	1.39
mmu-miR-34c-5p	1	mature	mir-34	0.04
mmu-miR-140-3p	351	mature	mir-140	14.3
mmu-miR-26b-5p	744	mature	mir-26	30.32
mmu-miR-34b-5p	2	mature	mir-34	0.08
mmu-miR-7075-3p	8	mature	undef	0.33
mmu-miR-99b-5p	1418	mature	mir-10	57.78
mmu-miR-361-5p	27	mature	mir-361	1.1
mmu-miR-186-5p	123	mature	mir-186	5.01
mmu-miR-322-5p	107	mature	mir-322	4.36
mmu-miR-5126	1569	mature	undef	63.94
mmu-miR-471-3p	10	mature	mir-471	0.41
mmu-miR-328-3p	8968	mature	mir-328	365.44
mmu-miR-467c-5p	1	mature	mir-467	0.04
mmu-miR-200c-3p	28	mature	mir-8	1.14
mmu-miR-384-5p	5	mature	mir-384	0.2
mmu-miR-652-3p	2848	mature	mir-652	116.06
mmu-miR-126a-3p	522	mature	mir-126	21.27
mmu-let-7a-5p	4701	mature	let-7	191.56
mmu-miR-202-5p	1	mature	mir-202	0.04
mmu-miR-6953-3p	29	mature	undef	1.18
mmu-miR-322-3p	51	mature	mir-322	2.08
mmu-miR-872-5p	801	mature	mir-872	32.64
mmu-miR-500-3p	32	mature	mir-500	1.3
mmu-miR-425-3p	661	mature	mir-425	26.94
mmu-miR-153-3p	4	mature	mir-153	0.16
mmu-miR-709	31	mature	undef	1.26
mmu-miR-326-3p	531	mature	mir-326	21.64
mmu-miR-871-3p	1	mature	mir-743	0.04
mmu-miR-16-2-3p	32	mature	mir-15	1.3
mmu-miR-3470b	1	mature	mir-3470	0.04
mmu-miR-204-5p	799	mature	mir-204	32.56
mmu-miR-6939-3p	25	mature	undef	1.02
mmu-miR-503-3p	105	mature	mir-503	4.28
mmu-miR-486b-3p	1929	mature	mir-486	78.61
mmu-miR-574-3p	129	mature	mir-574	5.26
mmu-miR-151-5p	260	mature	mir-28	10.59
mmu-miR-133a-3p	269	mature	mir-133	10.96
mmu-miR-10a-5p	1470	mature	mir-10	59.9
mmu-let-7b-5p	3854	mature	let-7	157.05
mmu-miR-499-5p	152	mature	mir-499	6.19
mmu-miR-486a-5p,mmu-miR-486b-5p	10330	mature	mir-486	420.95
mmu-miR-30e-3p	21	mature	mir-30	0.86
mmu-miR-339-5p	31	mature	mir-339	1.26
mmu-miR-382-5p	2	mature	mir-154	0.08
mmu-miR-192-5p	2161	mature	mir-192	88.06
mmu-miR-878-3p	1	mature	mir-878	0.04
mmu-miR-2137	8	mature	undef	0.33
mmu-miR-378c	1	mature	undef	0.04
mmu-miR-25-3p	10654	mature	mir-25	434.15
mmu-miR-19b-3p	379	mature	mir-19	15.44
mmu-miR-676-3p	516	mature	mir-676	21.03
mmu-let-7g-5p	10012	mature	let-7	407.99
mmu-miR-222-3p	167	mature	mir-221	6.81
mmu-miR-7a-1-3p	310	mature	mir-7	12.63
mmu-miR-15b-3p	68	mature	mir-15	2.77
mmu-miR-296-5p	146	mature	mir-296	5.95
mmu-miR-1983	819	mature	undef	33.37
mmu-miR-181a-5p	487	mature	mir-181	19.85
mmu-miR-92a-3p	13753	mature	mir-25	560.43
mmu-miR-378d	3	mature	undef	0.12
mmu-miR-146a-5p	14948	mature	mir-146	609.13
mmu-miR-30a-5p	228	mature	mir-30	9.29
mmu-miR-3965	3	mature	undef	0.12
mmu-miR-3068-5p	1	mature	mir-3068	0.04
mmu-miR-6538	3	mature	undef	0.12
mmu-miR-24-3p	13518	mature	mir-24	550.86
mmu-miR-7044-3p	47	mature	undef	1.92
mmu-miR-223-5p	128	mature	mir-223	5.22
mmu-miR-193a-5p	28	mature	mir-193	1.14
mmu-miR-9-5p	3	mature	mir-9	0.12
mmu-miR-122-5p	2134	mature	mir-122	86.96
mmu-miR-196a-5p	89	mature	mir-196	3.63
mmu-miR-369-5p	2	mature	mir-154	0.08
mmu-miR-1198-5p	13722	mature	undef	559.17
mmu-miR-532-5p	1664	mature	mir-188	67.81
mmu-miR-146b-5p	1	mature	mir-146	0.04
mmu-miR-434-5p	1	mature	mir-434	0.04
mmu-miR-96-5p	1	mature	mir-96	0.04
mmu-miR-203-3p	46	mature	mir-203	1.87
mmu-miR-744-5p	102	mature	mir-744	4.16
mmu-miR-365-3p	23	mature	mir-365	0.94
mmu-miR-341-3p	8	mature	mir-341	0.33
mmu-miR-23a-3p	14353	mature	mir-23	584.88
mmu-miR-6948-3p	1	mature	undef	0.04
mmu-miR-100-5p	882	mature	mir-10	35.94
mmu-miR-155-5p	30	mature	mir-155	1.22
mmu-miR-466h-3p	18	mature	mir-467	0.73
mmu-miR-145a-5p	136	mature	mir-145	5.54
mmu-miR-27b-3p	4762	mature	mir-27	194.05
mmu-miR-342-3p	550	mature	mir-342	22.41
mmu-miR-15a-5p	760	mature	mir-15	30.97
mmu-miR-149-5p	590	mature	mir-149	24.04
mmu-miR-128-3p	2962	mature	mir-128	120.7
mmu-miR-29a-3p	140	mature	mir-29	5.7
mmu-miR-144-3p	483	mature	mir-144	19.68
mmu-miR-3102-5p.2-5p	20	mature	mir-3102	0.81
mmu-miR-31-5p	67	mature	mir-31	2.73
mmu-miR-872-3p	189	mature	mir-872	7.7
mmu-miR-7043-3p	28	mature	undef	1.14
mmu-miR-148a-3p	232	mature	mir-148	9.45
mmu-miR-384-3p	2	mature	mir-384	0.08
mmu-miR-200a-3p	85	mature	mir-8	3.46
mmu-miR-181d-5p	276	mature	mir-181	11.25
mmu-miR-148b-3p	43	mature	mir-148	1.75
mmu-miR-201-5p	2	mature	mir-743	0.08
mmu-miR-205-5p	143	mature	mir-205	5.83
mmu-miR-33-5p	34	mature	mir-33	1.39
mmu-miR-490-5p	69	mature	mir-490	2.81
mmu-miR-219a-2-3p	37	mature	mir-219	1.51
mmu-miR-150-5p	2681	mature	mir-150	109.25
mmu-miR-547-3p	2	mature	mir-547	0.08
mmu-miR-99b-3p	112	mature	mir-10	4.56
mmu-miR-34c-3p	152	mature	mir-34	6.19
mmu-miR-409-3p	1	mature	mir-154	0.04
mmu-miR-203b-5p	22	mature	undef	0.9
mmu-miR-126a-5p	78	mature	mir-126	3.18
mmu-miR-465a-3p,mmu-miR-465b-3p,mmu-miR-465c-3p	12	mature	mir-465	0.49
mmu-miR-129-5p	3	mature	mir-129	0.12
mmu-let-7c-5p	5498	mature	let-7	224.04
mmu-miR-383-5p	4	mature	mir-383	0.16
mmu-miR-191-5p	29571	mature	mir-191	1205.01
mmu-miR-142a-5p	118	mature	mir-142	4.81
mmu-miR-29b-3p	24	mature	mir-29	0.98
novel_mir1	2470	miRNA	NC_000076.6:-:91181413_91181483	100.65
novel_mir2	464	miRNA	NC_000071.6:+:123330830_123330893	18.91
novel_mir3	251	miRNA	NC_000068.7:-:170257941_170258043	10.23
novel_mir4	839	miRNA	NC_000067.6:+:35999106_35999150	34.19
novel_mir5	29	miRNA	NC_000072.6:+:26101634_26101685	1.18
novel_mir6	3601	miRNA	NC_000086.7:-:153726355_153726415	146.74
novel_mir7	154	miRNA	NC_000071.6:-:60672514_60672591	6.28
novel_mir8	77	miRNA	NC_000080.6:-:70418968_70419036	3.14
novel_mir10	10	miRNA	NC_000079.6:+:91491763_91491819	0.41
novel_mir11	441	miRNA	NC_000068.7:-:162133623_162133675	17.97
novel_mir12	761	miRNA	NC_000077.6:+:118575166_118575257	31.01
novel_mir14	14	miRNA	NC_000083.6:-:59459907_59459992	0.57
novel_mir16	252	miRNA	NC_000067.6:-:188833430_188833485	10.27
novel_mir19	22	miRNA	NC_000082.6:-:61079660_61079706	0.9
novel_mir20	93	miRNA	NC_000068.7:-:112168767_112168826	3.79
novel_mir21	28	miRNA	NC_000085.6:+:44700142_44700213	1.14
novel_mir22	301	miRNA	NT_187009.1:-:923079_923134	12.27
novel_mir23	43	miRNA	NC_000080.6:+:16204958_16205047	1.75
novel_mir24	12	miRNA	NC_000070.6:+:50815124_50815201	0.49
novel_mir25	10	miRNA	NC_000067.6:-:58256258_58256303	0.41
novel_mir26	221	miRNA	NC_000084.6:-:11989788_11989827	9.01
novel_mir27	18	miRNA	NC_000071.6:+:130432237_130432300	0.73
novel_mir29	18	miRNA	NC_000067.6:-:20741914_20741982	0.73
novel_mir31	99	miRNA	NC_000084.6:+:38341328_38341367	4.03
novel_mir32	189	miRNA	NC_000085.6:+:57467284_57467342	7.7
novel_mir33	16	miRNA	NC_000068.7:+:22589657_22589745	0.65
novel_mir34	23	miRNA	NC_000081.6:+:86097541_86097615	0.94
novel_mir35	25	miRNA	NC_000076.6:-:54261755_54261805	1.02
novel_mir37	11	miRNA	NC_000084.6:-:41731992_41732037	0.45
novel_mir39	12	miRNA	NC_000072.6:-:57475877_57475944	0.49
novel_mir41	269	miRNA	NC_000082.6:+:86985695_86985754	10.96
novel_mir42	383	miRNA	NC_000086.7:-:103939332_103939372	15.61
novel_mir43	5102	miRNA	NC_000071.6:-:99978470_99978516	207.91
novel_mir44	134	miRNA	NC_000074.6:+:108374449_108374506	5.46
novel_mir47	36	miRNA	NC_000080.6:-:60413061_60413130	1.47
novel_mir50	103	miRNA	NC_000078.6:-:106554028_106554071	4.2
novel_mir52	48	miRNA	NC_000068.7:-:81275822_81275881	1.96
novel_mir54	6870	miRNA	NC_000077.6:-:45980271_45980363	279.95
novel_mir55	87	miRNA	NC_000086.7:+:164078878_164078919	3.55
novel_mir58	14	miRNA	NC_000073.6:-:24553172_24553216	0.57
novel_mir60	1433	miRNA	NC_000074.6:-:123155711_123155747	58.39
novel_mir62	474	miRNA	NC_000069.6:-:145758824_145758869	19.32
novel_mir66	66	miRNA	NC_000068.7:+:112747955_112748035	2.69
novel_mir74	26	miRNA	NC_000068.7:-:127677452_127677496	1.06
novel_mir78	78	miRNA	NC_000076.6:-:80549436_80549484	3.18
novel_mir80	140	miRNA	NC_000083.6:-:5841146_5841209	5.7
novel_mir81	10719	miRNA	NC_000079.6:+:43481285_43481337	436.8
novel_mir82	10763	miRNA	NC_000068.7:+:181459529_181459621	438.59
novel_mir82	2409	miRNA	NC_000068.7:+:181459598_181459664	98.17
novel_mir83	11957	miRNA	NC_000068.7:-:92183556_92183644	487.25
novel_mir84	95	miRNA	NC_000069.6:+:145758654_145758708	3.87
novel_mir85	319	miRNA	NC_000076.6:+:81559311_81559391	13
novel_mir86	466	miRNA	NC_000073.6:-:80390965_80391057	18.99
novel_mir87	15092	miRNA	NC_000081.6:-:102203956_102204024	615
novel_mir88	4541	miRNA	NC_000068.7:+:163054762_163054825	185.04
novel_mir89	27	miRNA	NC_000084.6:-:35896739_35896803	1.1
novel_mir80	1252	miRNA	NC_000083.6:-:5841110_5841167	51.02
novel_mir90	30	miRNA	NC_000073.6:+:19519020_19519075	1.22
novel_mir91	1239	miRNA	NC_000073.6:+:81859270_81859350	50.49
novel_mir92	101	miRNA	NC_000074.6:-:22227264_22227341	4.12
novel_mir93	1875	miRNA	NC_000077.6:-:3290148_3290225	76.41
novel_mir94	914	miRNA	NC_000069.6:+:95659166_95659229	37.25
novel_mir95	102	miRNA	NC_000078.6:+:55820542_55820616	4.16
novel_mir96	236	miRNA	NC_000086.7:-:20291537_20291606	9.62
novel_mir98	12771	miRNA	NC_000083.6:-:46031750_46031799	520.42
novel_mir99	1908	miRNA	NC_000081.6:-:98296233_98296276	77.75
novel_mir101	32	miRNA	NC_000084.6:+:41062181_41062221	1.3
novel_mir102	23	miRNA	NC_000085.6:-:3455465_3455513	0.94
novel_mir103	78	miRNA	NC_000081.6:+:48889735_48889810	3.18
novel_mir105	32834	miRNA	NC_000081.6:-:75748234_75748287	1337.98
novel_mir106	2893	miRNA	NT_187005.1:-:1312610_1312696	117.89
novel_mir107	365	miRNA	NC_000069.6:+:41565789_41565835	14.87
novel_mir108	17017	miRNA	NC_000068.7:+:162660772_162660816	693.44
novel_mir110	34	miRNA	NC_000086.7:+:8074616_8074665	1.39
novel_mir111	234	miRNA	NC_000085.6:+:59345354_59345408	9.54
novel_mir112	123	miRNA	NC_000070.6:+:63261654_63261739	5.01
novel_mir113	26	miRNA	NC_000082.6:+:22857866_22857906	1.06
novel_mir114	964	miRNA	NC_000075.6:-:31281186_31281265	39.28
novel_mir115	276	miRNA	NC_000075.6:+:70679136_70679203	11.25
novel_mir116	26	miRNA	NC_000070.6:-:154636176_154636227	1.06
novel_mir119	8490	miRNA	NC_000071.6:-:137531454_137531494	345.97
novel_mir122	2905	miRNA	NC_000078.6:+:40446585_40446665	118.38
novel_mir96	122	miRNA	NC_000086.7:-:20291588_20291650	4.97
novel_mir123	56	miRNA	NC_000073.6:-:140857173_140857226	2.28
novel_mir124	125	miRNA	NC_000083.6:-:36111423_36111465	5.09
novel_mir126	80	miRNA	NC_000070.6:+:135526618_135526693	3.26
novel_mir124	1545	miRNA	NC_000083.6:-:36032419_36032461	62.96
novel_mir127	6761	miRNA	NC_000075.6:-:20642110_20642160	275.51
novel_mir128	974	miRNA	NC_000076.6:-:80742143_80742216	39.69
novel_mir129	15	miRNA	NC_000071.6:+:110363316_110363383	0.61
novel_mir130	287	miRNA	NC_000073.6:-:127232910_127232978	11.7
novel_mir131	32	miRNA	NC_000086.7:+:164467992_164468074	1.3
novel_mir132	72	miRNA	NC_000071.6:-:93093102_93093171	2.93
novel_mir133	8720	miRNA	NC_000073.6:-:127614726_127614789	355.34
novel_mir134	39	miRNA	NC_000076.6:-:81411733_81411810	1.59
novel_mir135	383	miRNA	NC_000069.6:+:89090487_89090577	15.61
novel_mir137	39	miRNA	NC_000083.6:-:46165578_46165662	1.59
novel_mir139	67	miRNA	NC_000074.6:+:119600779_119600851	2.73
novel_mir140	3928	miRNA	NC_000068.7:+:164071224_164071286	160.07
novel_mir95	78	miRNA	NC_000078.6:+:55820596_55820644	3.18
novel_mir141	70	miRNA	NC_000073.6:+:99535194_99535252	2.85
novel_mir142	84	miRNA	NC_000085.6:-:46044727_46044800	3.42
novel_mir143	36	miRNA	NC_000068.7:-:156018597_156018666	1.47
novel_mir144	81	miRNA	NC_000083.6:+:43824957_43825038	3.3
novel_mir135	71	miRNA	NC_000069.6:+:89090431_89090508	2.89
novel_mir145	76	miRNA	NC_000068.7:+:93445084_93445158	3.1
novel_mir146	29	miRNA	NC_000081.6:-:85693780_85693841	1.18
novel_mir148	118	miRNA	NC_000072.6:+:71543896_71543968	4.81
novel_mir150	84	miRNA	NC_000082.6:+:43762434_43762503	3.42
novel_mir152	73	miRNA	NC_000071.6:+:111559417_111559476	2.97
novel_mir153	121	miRNA	NC_000068.7:-:145860270_145860334	4.93
novel_mir154	81	miRNA	NC_000085.6:+:38395915_38395973	3.3
novel_mir155	38	miRNA	NC_000081.6:-:73466760_73466806	1.55
novel_mir157	28	miRNA	NC_000071.6:+:148959491_148959568	1.14
novel_mir158	26	miRNA	NC_000077.6:-:114324864_114324907	1.06
novel_mir159	10	miRNA	NC_000070.6:-:136834899_136834966	0.41
novel_mir160	62	miRNA	NC_000077.6:+:51817207_51817288	2.53
novel_mir161	301	miRNA	NC_000077.6:+:119086355_119086420	12.27
novel_mir164	39	miRNA	NC_000075.6:-:88482806_88482848	1.59
novel_mir166	68	miRNA	NC_000067.6:+:91665025_91665069	2.77
novel_mir169	117	miRNA	NC_000068.7:-:165728943_165729012	4.77
novel_mir171	1324	miRNA	NC_000081.6:-:99239742_99239814	53.95
novel_mir172	95	miRNA	NC_000085.6:+:6251617_6251695	3.87
novel_mir173	2329	miRNA	NC_000079.6:+:98925879_98925954	94.91
novel_mir174	11663	miRNA	NC_000071.6:-:99728614_99728695	475.26
novel_mir175	37	miRNA	NC_000069.6:-:65392371_65392425	1.51
novel_mir176	322	miRNA	NC_000069.6:-:42177626_42177701	13.12
novel_mir178	149	miRNA	NC_000086.7:+:129750677_129750743	6.07
novel_mir179	255	miRNA	NC_000078.6:-:55398665_55398719	10.39
novel_mir180	99	miRNA	NC_000068.7:-:113216923_113217001	4.03
novel_mir181	321	miRNA	NC_000070.6:-:141893114_141893172	13.08
novel_mir182	69	miRNA	NC_000078.6:-:103202973_103203054	2.81
novel_mir183	274	miRNA	NC_000078.6:-:100199358_100199409	11.17
novel_mir184	29	miRNA	NC_000077.6:-:95600685_95600771	1.18
novel_mir185	43	miRNA	NC_000074.6:-:122486941_122486997	1.75
novel_mir186	119	miRNA	NC_000086.7:-:7922264_7922331	4.85
novel_mir187	49990	miRNA	NC_000073.6:-:139894848_139894921	2037.08
novel_mir188	563	miRNA	NC_000081.6:-:85626253_85626305	22.94
novel_mir189	89	miRNA	NC_000074.6:+:25241394_25241451	3.63
novel_mir190	71	miRNA	NC_000083.6:-:74211840_74211896	2.89
novel_mir191	38	miRNA	NC_000074.6:-:47613368_47613427	1.55
novel_mir193	3220	miRNA	NC_000086.7:-:73659266_73659307	131.21
novel_mir194	114	miRNA	NC_000073.6:+:131084762_131084837	4.65
novel_mir196	58	miRNA	NC_000077.6:+:78826787_78826841	2.36
novel_mir197	201	miRNA	NC_000068.7:-:156576326_156576401	8.19
novel_mir198	23	miRNA	NC_000074.6:-:124636231_124636279	0.94
novel_mir199	35	miRNA	NC_000080.6:+:28504414_28504495	1.43
novel_mir201	967	miRNA	NC_000074.6:-:123834471_123834536	39.41
novel_mir202	50	miRNA	NC_000072.6:+:132439457_132439516	2.04
novel_mir204	88	miRNA	NC_000073.6:+:134677666_134677741	3.59
novel_mir205	31	miRNA	NC_000083.6:+:27711211_27711255	1.26
novel_mir206	30	miRNA	NC_000067.6:+:178942745_178942799	1.22
novel_mir124	71	miRNA	NT_187009.1:-:17589_17654	2.89
novel_mir210	29	miRNA	NC_000073.6:+:141631188_141631256	1.18
novel_mir212	12	miRNA	NC_000070.6:-:102088016_102088098	0.49
novel_mir213	28	miRNA	NC_000070.6:+:10663875_10663982	1.14
novel_mir214	12	miRNA	NC_000071.6:-:100295342_100295411	0.49
novel_mir215	1531	miRNA	NC_000080.6:-:55887309_55887386	62.39
novel_mir217	36	miRNA	NC_000071.6:+:21827536_21827598	1.47
novel_mir105	122	miRNA	NC_000084.6:+:46198854_46198909	4.97
novel_mir219	59	miRNA	NC_000077.6:-:119870701_119870768	2.4
novel_mir220	349	miRNA	NC_000076.6:-:60781756_60781831	14.22
novel_mir222	284	miRNA	NC_000075.6:-:91365920_91365983	11.57
novel_mir225	37	miRNA	NC_000071.6:-:113942835_113942874	1.51
novel_mir226	833	miRNA	NC_000071.6:+:130222295_130222372	33.94
novel_mir227	6136	miRNA	NC_000079.6:-:42052748_42052821	250.04
novel_mir230	49	miRNA	NC_000081.6:-:75672830_75672905	2
novel_mir232	5544	miRNA	NC_000071.6:+:34187172_34187219	225.92
novel_mir233	224	miRNA	NC_000069.6:+:107443551_107443635	9.13
novel_mir234	110	miRNA	NC_000083.6:-:33551318_33551398	4.48
novel_mir235	236	miRNA	NC_000076.6:-:123196934_123197001	9.62
novel_mir237	2782	miRNA	NC_000076.6:-:26374343_26374407	113.37
novel_mir238	53	miRNA	NC_000082.6:+:91904225_91904306	2.16
novel_mir239	84	miRNA	NC_000073.6:-:52005684_52005738	3.42
novel_mir226	577	miRNA	NC_000071.6:+:130222273_130222313	23.51
novel_mir245	93	miRNA	NC_000077.6:+:106167001_106167077	3.79
novel_mir97	113	miRNA	NC_000080.6:+:56865073_56865137	4.6
novel_mir248	52	miRNA	NC_000071.6:-:41860705_41860786	2.12
novel_mir249	47	miRNA	NC_000076.6:-:79989447_79989517	1.92
novel_mir250	15	miRNA	NC_000070.6:-:22084535_22084615	0.61
novel_mir251	39	miRNA	NC_000070.6:-:118455855_118455911	1.59
novel_mir253	33	miRNA	NC_000067.6:-:39391007_39391055	1.34
novel_mir254	16	miRNA	NC_000070.6:+:152552823_152552914	0.65
novel_mir255	262	miRNA	NC_000067.6:+:191906818_191906885	10.68
novel_mir257	66	miRNA	NC_000068.7:+:172830524_172830572	2.69
novel_mir258	73	miRNA	NC_000073.6:-:44866787_44866858	2.97
novel_mir260	793	miRNA	NC_000073.6:-:75762483_75762575	32.31
novel_mir262	25	miRNA	NC_000075.6:+:52677697_52677771	1.02
novel_mir264	47	miRNA	NC_000073.6:+:28506571_28506639	1.92
novel_mir265	79	miRNA	NC_000072.6:+:125236478_125236520	3.22
novel_mir266	122	miRNA	NC_000071.6:-:114779670_114779754	4.97
novel_mir267	77	miRNA	NC_000071.6:-:33259686_33259738	3.14
novel_mir268	176	miRNA	NC_000077.6:-:74724019_74724098	7.17
novel_mir269	34	miRNA	NC_000076.6:-:24595498_24595573	1.39
novel_mir270	36	miRNA	NC_000073.6:+:78807627_78807689	1.47
novel_mir271	2798	miRNA	NC_000070.6:+:134468406_134468448	114.02
novel_mir272	488	miRNA	NC_000072.6:-:37687054_37687104	19.89
novel_mir273	21	miRNA	NC_000077.6:-:78035803_78035887	0.86
novel_mir274	592	miRNA	NT_187064.1:+:48742_48817	24.12
novel_mir278	35	miRNA	NC_000077.6:+:117946651_117946701	1.43
novel_mir279	795	miRNA	NC_000082.6:-:30886410_30886485	32.4
novel_mir282	26467	miRNA	NC_000076.6:+:80857300_80857381	1078.52
novel_mir283	27	miRNA	NC_000081.6:+:97072263_97072321	1.1
novel_mir284	41	miRNA	NC_000068.7:-:90522887_90522929	1.67
novel_mir285	1043	miRNA	NC_000070.6:+:114339859_114339917	42.5
novel_mir286	12	miRNA	NC_000083.6:-:13405663_13405730	0.49
novel_mir289	37	miRNA	NC_000083.6:-:83514049_83514117	1.51
novel_mir290	17	miRNA	NC_000067.6:+:132515446_132515501	0.69
novel_mir292	22	miRNA	NC_000078.6:+:102524484_102524565	0.9
novel_mir293	51	miRNA	NC_000078.6:-:106010168_106010246	2.08
novel_mir297	23	miRNA	NC_000073.6:-:43344720_43344790	0.94
novel_mir298	655	miRNA	NC_000073.6:-:81934338_81934403	26.69
novel_mir301	855	miRNA	NC_000077.6:+:97463225_97463314	34.84
novel_mir302	58	miRNA	NC_000085.6:+:4261929_4262007	2.36
novel_mir303	58	miRNA	NC_000070.6:-:139265196_139265274	2.36
novel_mir304	40	miRNA	NC_000083.6:+:15236517_15236575	1.63
novel_mir306	57	miRNA	NC_000070.6:+:152494568_152494640	2.32
novel_mir307	166	miRNA	NC_000071.6:-:64802449_64802506	6.76
novel_mir310	28	miRNA	NC_000075.6:+:104839700_104839791	1.14
novel_mir311	136	miRNA	NC_000071.6:+:31068611_31068673	5.54
novel_mir313	653	miRNA	NC_000070.6:-:62502116_62502175	26.61
novel_mir316	206	miRNA	NC_000070.6:-:151761104_151761192	8.39
novel_mir319	427	miRNA	NC_000073.6:+:24450551_24450604	17.4
novel_mir321	28	miRNA	NC_000067.6:+:157025875_157025913	1.14
novel_mir322	170	miRNA	NC_000081.6:-:99699844_99699936	6.93
novel_mir323	40	miRNA	NC_000067.6:+:143610248_143610320	1.63
novel_mir327	56	miRNA	NC_000070.6:-:126288482_126288523	2.28
novel_mir328	146	miRNA	NC_000068.7:-:131902909_131902951	5.95
novel_mir329	23	miRNA	NT_039634.4:-:394662_394717	0.94
novel_mir330	146	miRNA	NC_000077.6:+:84958350_84958435	5.95
novel_mir333	109	miRNA	NC_000083.6:+:28028204_28028272	4.44
novel_mir334	42	miRNA	NC_000077.6:-:118825855_118825908	1.71
novel_mir336	63	miRNA	NC_000077.6:+:7071300_7071348	2.57
novel_mir340	2982	miRNA	NC_000068.7:-:74661221_74661296	121.52
novel_mir341	19	miRNA	NC_000073.6:+:141217045_141217116	0.77
novel_mir342	78	miRNA	NC_000085.6:+:44750991_44751064	3.18
novel_mir343	115	miRNA	NC_000073.6:+:98104502_98104581	4.69
novel_mir344	16	miRNA	NC_000075.6:-:20771654_20771701	0.65
novel_mir345	184	miRNA	NC_000073.6:-:113293753_113293829	7.5
novel_mir346	72	miRNA	NC_000074.6:-:94696151_94696210	2.93
novel_mir347	3531	miRNA	NC_000083.6:-:45349886_45349936	143.89
novel_mir348	228	miRNA	NC_000083.6:-:45970747_45970837	9.29
novel_mir350	20	miRNA	NC_000071.6:+:138117373_138117448	0.81
novel_mir351	82	miRNA	NC_000083.6:-:31845144_31845206	3.34
novel_mir353	31	miRNA	NC_000067.6:-:37614773_37614855	1.26
novel_mir354	32	miRNA	NC_000079.6:-:103643152_103643197	1.3
novel_mir355	225	miRNA	NC_000076.6:+:127984611_127984689	9.17
novel_mir357	1638	miRNA	NC_000074.6:+:94418880_94418962	66.75
novel_mir358	26	miRNA	NC_000081.6:-:78876371_78876424	1.06
novel_mir359	638	miRNA	NC_000079.6:-:96542324_96542391	26
novel_mir361	34	miRNA	NC_000068.7:-:35517737_35517815	1.39
novel_mir363	5749	miRNA	NC_000072.6:+:17307623_17307665	234.27
novel_mir364	68	miRNA	NC_000083.6:-:8987034_8987116	2.77
novel_mir366	27	miRNA	NT_187003.1:+:2157815_2157876	1.1
novel_mir380	107	miRNA	NC_000071.6:-:145114722_145114793	4.36
novel_mir381	44	miRNA	NC_000068.7:-:120284154_120284202	1.79
novel_mir382	85	miRNA	NC_000067.6:-:52708667_52708719	3.46
novel_mir385	20	miRNA	NT_039662.3:+:1411517_1411585	0.81
novel_mir388	144	miRNA	NC_000077.6:-:21989852_21989925	5.87
novel_mir389	100	miRNA	NC_000075.6:-:56438153_56438221	4.07
novel_mir392	14	miRNA	NC_000075.6:+:110635080_110635146	0.57
novel_mir394	142	miRNA	NC_000073.6:-:132628682_132628768	5.79
novel_mir395	287	miRNA	NC_000070.6:-:140479923_140480004	11.7
novel_mir396	33	miRNA	NC_000073.6:+:36695423_36695487	1.34
novel_mir398	115	miRNA	NT_187004.1:-:1182701_1182783	4.69
novel_mir401	66	miRNA	NC_000073.6:-:78574928_78574997	2.69
novel_mir406	194	miRNA	NC_000079.6:+:41605511_41605583	7.91
novel_mir407	126	miRNA	NT_187007.1:-:88413_88477	5.13
novel_mir409	29	miRNA	NC_000067.6:-:131257092_131257147	1.18
novel_mir410	315	miRNA	NC_000081.6:-:97953917_97954005	12.84
novel_mir414	17	miRNA	NC_000069.6:+:95764098_95764148	0.69
novel_mir415	92	miRNA	NC_000071.6:+:121835513_121835575	3.75
novel_mir419	66	miRNA	NC_000076.6:+:18020587_18020660	2.69
novel_mir421	33	miRNA	NC_000077.6:+:78484668_78484723	1.34
novel_mir426	43	miRNA	NC_000068.7:+:174644614_174644687	1.75
novel_mir429	69	miRNA	NC_000074.6:+:30913879_30913947	2.81
novel_mir180	169	miRNA	NC_000068.7:-:113216976_113217023	6.89
novel_mir431	35	miRNA	NC_000069.6:+:98230560_98230610	1.43
novel_mir432	101	miRNA	NC_000077.6:-:3410316_3410393	4.12
novel_mir433	1633	miRNA	NC_000076.6:-:117966368_117966448	66.54
novel_mir435	26	miRNA	NC_000077.6:+:54438662_54438718	1.06
novel_mir437	52	miRNA	NC_000071.6:+:124636415_124636469	2.12
novel_mir442	37	miRNA	NC_000076.6:+:59323353_59323403	1.51
novel_mir443	17	miRNA	NC_000072.6:+:138828095_138828171	0.69
novel_mir444	24	miRNA	NC_000070.6:+:131716572_131716651	0.98
novel_mir446	26	miRNA	NC_000081.6:-:98869698_98869776	1.06
novel_mir448	114	miRNA	NC_000070.6:+:151956513_151956561	4.65
novel_mir450	39	miRNA	NC_000077.6:+:61018096_61018158	1.59
novel_mir451	136	miRNA	NC_000075.6:+:122006921_122006996	5.54
novel_mir453	58	miRNA	NC_000080.6:+:54271761_54271847	2.36
novel_mir454	29	miRNA	NC_000077.6:-:97981476_97981557	1.18
novel_mir455	175	miRNA	NC_000074.6:-:60759029_60759084	7.13
novel_mir456	12	miRNA	NC_000079.6:-:14043080_14043151	0.49
novel_mir457	36	miRNA	NC_000083.6:-:30717912_30717984	1.47
novel_mir467	358	miRNA	NC_000075.6:-:120602887_120602952	14.59
novel_mir468	18287	miRNA	NC_000084.6:+:75380583_75380647	745.19
novel_mir475	385	miRNA	NC_000076.6:-:120031503_120031575	15.69
novel_mir477	45	miRNA	NC_000082.6:+:38062460_38062545	1.83
novel_mir479	26	miRNA	NC_000070.6:-:137920998_137921052	1.06
novel_mir480	77	miRNA	NC_000083.6:-:10223854_10223928	3.14
novel_mir482	209	miRNA	NC_000073.6:-:83753956_83754030	8.52
novel_mir487	27	miRNA	NC_000077.6:+:97380146_97380217	1.1
novel_mir488	90	miRNA	NC_000071.6:+:30772246_30772325	3.67
novel_mir489	138	miRNA	NC_000077.6:-:6444601_6444689	5.62
novel_mir490	94	miRNA	NC_000068.7:-:157334553_157334592	3.83
novel_mir493	21	miRNA	NC_000077.6:-:119979481_119979570	0.86
novel_mir494	352	miRNA	NC_000075.6:-:59353395_59353472	14.34
novel_mir496	70	miRNA	NC_000071.6:-:21458036_21458107	2.85
novel_mir502	37	miRNA	NC_000074.6:-:122242851_122242911	1.51
novel_mir503	40	miRNA	NC_000083.6:-:57263135_57263190	1.63
novel_mir507	135	miRNA	NC_000073.6:-:112204095_112204164	5.5
novel_mir508	14	miRNA	NC_000083.6:+:28269734_28269797	0.57
novel_mir509	29	miRNA	NC_000082.6:-:34229462_34229534	1.18
novel_mir513	278	miRNA	NC_000067.6:-:127306612_127306655	11.33
novel_mir520	18	miRNA	NC_000074.6:-:124318939_124319001	0.73
novel_mir521	65	miRNA	NC_000074.6:-:84764064_84764144	2.65
novel_mir525	25	miRNA	NC_000070.6:+:139188202_139188256	1.02
novel_mir531	64	miRNA	NC_000078.6:+:103489233_103489292	2.61
novel_mir532	48	miRNA	NC_000069.6:+:96154780_96154853	1.96
novel_mir535	126	miRNA	NC_000078.6:+:105475393_105475484	5.13
novel_mir537	58	miRNA	NC_000067.6:-:168221153_168221210	2.36
novel_mir540	27	miRNA	NC_000079.6:-:100902813_100902887	1.1
novel_mir542	47	miRNA	NC_000083.6:+:11062207_11062293	1.92
novel_mir544	209	miRNA	NC_000077.6:-:119502694_119502743	8.52
novel_mir549	36	miRNA	NC_000069.6:+:90388352_90388444	1.47
novel_mir550	15	miRNA	NC_000079.6:+:6552517_6552591	0.61
novel_mir551	26	miRNA	NC_000067.6:-:35810092_35810164	1.06
novel_mir552	85	miRNA	NC_000070.6:-:141011926_141011977	3.46
novel_mir554	13	miRNA	NC_000074.6:+:108264682_108264741	0.53
novel_mir555	69	miRNA	NC_000070.6:-:124016090_124016164	2.81
novel_mir556	168	miRNA	NC_000074.6:+:84928843_84928915	6.85
novel_mir568	23	miRNA	NC_000069.6:-:142124897_142124964	0.94
novel_mir570	62	miRNA	NC_000081.6:+:76683351_76683399	2.53
novel_mir572	19	miRNA	NC_000067.6:+:187664448_187664514	0.77
novel_mir573	19	miRNA	NC_000084.6:-:46983873_46983920	0.77
novel_mir577	100	miRNA	NC_000075.6:-:90193855_90193927	4.07
novel_mir580	49	miRNA	NC_000072.6:-:89345642_89345714	2
novel_mir581	280	miRNA	NC_000070.6:-:135925402_135925458	11.41
novel_mir585	22	miRNA	NC_000077.6:+:54119298_54119379	0.9
novel_mir587	991	miRNA	NC_000074.6:+:23039294_23039360	40.38
novel_mir227	867	miRNA	NC_000085.6:-:12476813_12476870	35.33
novel_mir589	285	miRNA	NC_000077.6:+:113198918_113198972	11.61
novel_mir590	33	miRNA	NC_000076.6:-:61377387_61377459	1.34
novel_mir592	14	miRNA	NC_000076.6:+:70646557_70646635	0.57
novel_mir594	27	miRNA	NC_000076.6:-:83234908_83234953	1.1
novel_mir595	14	miRNA	NC_000068.7:-:5839142_5839211	0.57
novel_mir596	61	miRNA	NC_000067.6:+:12440152_12440203	2.49
novel_mir598	1882	miRNA	NC_000070.6:+:13750689_13750760	76.69
novel_mir599	31	miRNA	NC_000077.6:+:62677028_62677080	1.26
novel_mir602	28	miRNA	NC_000071.6:+:122934487_122934566	1.14
novel_mir604	77	miRNA	NC_000070.6:+:139546038_139546094	3.14
novel_mir605	149	miRNA	NC_000074.6:+:126729295_126729378	6.07
novel_mir606	22	miRNA	NC_000084.6:+:39822004_39822071	0.9
novel_mir609	14	miRNA	NC_000078.6:-:4162390_4162467	0.57
novel_mir611	20	miRNA	NC_000075.6:-:110768805_110768847	0.81
novel_mir612	37	miRNA	NC_000085.6:-:15336269_15336329	1.51
novel_mir613	25	miRNA	NC_000068.7:+:80435013_80435074	1.02
novel_mir617	42	miRNA	NC_000070.6:+:104510091_104510133	1.71
novel_mir618	6972	miRNA	NC_000069.6:-:156578540_156578613	284.11
novel_mir619	51	miRNA	NC_000070.6:+:116221621_116221695	2.08
novel_mir620	10	miRNA	NC_000073.6:+:28894972_28895016	0.41
novel_mir622	11	miRNA	NC_000068.7:+:14475028_14475070	0.45
novel_mir623	37	miRNA	NC_000078.6:+:8522114_8522164	1.51
novel_mir624	46	miRNA	NC_000076.6:+:94107234_94107299	1.87
novel_mir626	46	miRNA	NC_000076.6:+:52340409_52340480	1.87
novel_mir627	35	miRNA	NC_000069.6:+:27967671_27967728	1.43
novel_mir628	91	miRNA	NC_000080.6:+:92988123_92988201	3.71
novel_mir633	284	miRNA	NC_000075.6:-:123555301_123555350	11.57
novel_mir634	21	miRNA	NC_000067.6:-:92641269_92641347	0.86
novel_mir635	23	miRNA	NC_000072.6:-:134594869_134594929	0.94
novel_mir637	42	miRNA	NC_000082.6:+:91506141_91506208	1.71
novel_mir638	50	miRNA	NC_000073.6:-:44606683_44606742	2.04
novel_mir124	34	miRNA	NC_000083.6:-:36032443_36032517	1.39
novel_mir639	3050	miRNA	NC_000073.6:-:92669817_92669890	124.29
novel_mir443	28	miRNA	NC_000072.6:+:138828060_138828118	1.14
novel_mir645	39	miRNA	NC_000074.6:+:104639936_104639993	1.59
novel_mir646	159	miRNA	NC_000070.6:-:107382085_107382155	6.48
novel_mir650	96	miRNA	NC_000078.6:-:29974873_29974919	3.91
novel_mir653	21	miRNA	NC_000068.7:-:11854588_11854661	0.86
novel_mir655	28	miRNA	NC_000076.6:-:124106330_124106403	1.14
novel_mir659	41	miRNA	NC_000081.6:+:79141553_79141603	1.67
novel_mir660	22	miRNA	NC_000074.6:+:110957818_110957900	0.9
novel_mir662	228	miRNA	NC_000070.6:+:148602605_148602695	9.29
novel_mir671	128	miRNA	NC_000071.6:-:99862021_99862093	5.22
novel_mir675	63	miRNA	NC_000083.6:+:47593517_47593571	2.57
novel_mir679	179	miRNA	NC_000076.6:+:80030891_80030952	7.29
novel_mir680	175	miRNA	NC_000076.6:-:50504371_50504449	7.13
novel_mir683	103	miRNA	NC_000075.6:-:67561177_67561257	4.2
novel_mir684	111	miRNA	NC_000068.7:+:160232649_160232712	4.52
novel_mir685	42	miRNA	NC_000071.6:+:75763914_75763959	1.71
novel_mir686	153	miRNA	NC_000068.7:+:131140811_131140899	6.23
novel_mir691	1332	miRNA	NC_000070.6:-:84797942_84798042	54.28
novel_mir696	24	miRNA	NC_000083.6:-:84186092_84186156	0.98
novel_mir697	48	miRNA	NC_000082.6:+:10570555_10570605	1.96
novel_mir700	714	miRNA	NC_000069.6:-:137950427_137950486	29.1
novel_mir701	158	miRNA	NC_000077.6:-:118709862_118709916	6.44
novel_mir705	13	miRNA	NT_039662.3:+:1265622_1265676	0.53
novel_mir711	742	miRNA	NC_000068.7:+:151751558_151751634	30.24
novel_mir717	37	miRNA	NC_000067.6:-:130715817_130715885	1.51
novel_mir719	27	miRNA	NC_000084.6:-:63865455_63865505	1.1
novel_mir720	20	miRNA	NC_000079.6:+:13390482_13390524	0.81
novel_mir723	149	miRNA	NC_000077.6:-:53088945_53088986	6.07
novel_mir725	20	miRNA	NC_000083.6:-:4265968_4266013	0.81
novel_mir553	82	miRNA	NC_000070.6:+:152349449_152349524	3.34
novel_mir729	342	miRNA	NC_000082.6:-:13928933_13928984	13.94
novel_mir731	15	miRNA	NC_000078.6:+:74205578_74205617	0.61
novel_mir734	365	miRNA	NC_000074.6:-:85548620_85548676	14.87
novel_mir735	30	miRNA	NC_000085.6:-:25647960_25648038	1.22
novel_mir736	147	miRNA	NC_000073.6:-:44263144_44263203	5.99
novel_mir118	136	miRNA	NC_000077.6:-:59475989_59476052	5.54
novel_mir742	31	miRNA	NC_000073.6:+:48402749_48402792	1.26
novel_mir743	43	miRNA	NC_000071.6:+:150183062_150183127	1.75
novel_mir744	24	miRNA	NC_000068.7:+:36168630_36168682	0.98
novel_mir745	10	miRNA	NC_000079.6:-:94832619_94832688	0.41
novel_mir747	23	miRNA	NC_000072.6:+:4110608_4110690	0.94
novel_mir748	19	miRNA	NC_000074.6:+:65821293_65821356	0.77
novel_mir751	26	miRNA	NT_166305.2:+:3409375_3409447	1.06
novel_mir752	127	miRNA	NT_187027.1:+:3202050_3202097	5.18
novel_mir756	103	miRNA	NC_000081.6:+:80349151_80349218	4.2
novel_mir758	54	miRNA	NC_000073.6:-:46105120_46105170	2.2
novel_mir760	22	miRNA	NC_000083.6:+:13321849_13321918	0.9
novel_mir761	32	miRNA	NC_000077.6:-:97832136_97832192	1.3
novel_mir763	205	miRNA	NT_187023.1:+:385762_385817	8.35
novel_mir764	12750	miRNA	NC_000070.6:-:132266162_132266216	519.56
novel_mir767	55	miRNA	NC_000080.6:-:32029946_32029991	2.24
novel_mir768	626	miRNA	NC_000074.6:+:126265787_126265850	25.51
novel_mir769	70	miRNA	NC_000077.6:+:120478734_120478793	2.85
novel_mir767	286	miRNA	NC_000080.6:-:32029973_32030042	11.65
novel_mir771	25	miRNA	NC_000081.6:+:26120476_26120553	1.02
novel_mir772	108	miRNA	NT_095534.1:+:53589_53637	4.4
novel_mir773	295	miRNA	NC_000076.6:-:81345711_81345787	12.02
novel_mir775	29	miRNA	NC_000079.6:+:118128174_118128226	1.18
novel_mir777	64	miRNA	NC_000077.6:+:85264722_85264802	2.61
novel_mir779	33	miRNA	NC_000080.6:-:31148051_31148109	1.34
novel_mir781	48	miRNA	NC_000085.6:+:10224635_10224729	1.96
novel_mir784	62	miRNA	NC_000077.6:+:78183708_78183754	2.53
novel_mir787	21	miRNA	NC_000070.6:-:82934432_82934499	0.86
novel_mir788	49	miRNA	NC_000067.6:+:131278284_131278329	2
novel_mir282	61	miRNA	NC_000076.6:+:80857260_80857325	2.49
novel_mir791	29	miRNA	NC_000077.6:+:97454329_97454386	1.18
novel_mir793	51	miRNA	NC_000072.6:-:5803171_5803229	2.08
novel_mir800	132	miRNA	NC_000083.6:-:44013193_44013231	5.38
novel_mir801	39	miRNA	NC_000072.6:-:125490321_125490384	1.59
novel_mir802	419	miRNA	NC_000071.6:+:56803986_56804049	17.07
novel_mir807	59	miRNA	NC_000067.6:-:14592278_14592344	2.4
novel_mir808	56	miRNA	NC_000081.6:-:75024559_75024629	2.28
novel_mir813	24	miRNA	NC_000074.6:-:119471803_119471865	0.98
novel_mir816	38	miRNA	NC_000072.6:+:108668953_108669019	1.55
novel_mir818	650	miRNA	NC_000073.6:-:144210548_144210603	26.49
novel_mir819	117	miRNA	NC_000077.6:-:121386678_121386739	4.77
novel_mir821	35	miRNA	NC_000070.6:+:133754240_133754310	1.43
novel_mir822	12	miRNA	NC_000077.6:+:107802348_107802407	0.49
novel_mir824	42	miRNA	NC_000069.6:+:83055766_83055828	1.71
novel_mir829	357	miRNA	NC_000071.6:+:76857812_76857865	14.55
novel_mir830	62	miRNA	NC_000082.6:-:38763188_38763236	2.53
novel_mir833	13	miRNA	NC_000068.7:+:157462529_157462574	0.53
novel_mir835	16	miRNA	NC_000083.6:+:84219416_84219493	0.65
novel_mir836	67	miRNA	NC_000076.6:-:92677853_92677932	2.73
novel_mir837	314	miRNA	NC_000070.6:+:8606486_8606563	12.8
novel_mir838	11	miRNA	NC_000067.6:+:90922445_90922495	0.45
novel_mir842	16	miRNA	NC_000082.6:+:5188152_5188235	0.65
novel_mir855	1541	miRNA	NC_000075.6:-:108079010_108079083	62.8
novel_mir315	55	miRNA	NC_000078.6:+:80575609_80575681	2.24
novel_mir859	21	miRNA	NC_000070.6:+:107179298_107179344	0.86
novel_mir862	73	miRNA	NC_000073.6:-:99455449_99455511	2.97
novel_mir863	18	miRNA	NC_000077.6:+:64599366_64599407	0.73
novel_mir864	30	miRNA	NT_187027.1:+:1225999_1226047	1.22
novel_mir866	31	miRNA	NC_000068.7:+:153740617_153740697	1.26
novel_mir227	224	miRNA	NC_000070.6:-:135634617_135634666	9.13
novel_mir871	11	miRNA	NC_000083.6:+:26379407_26379495	0.45
novel_mir877	31	miRNA	NC_000084.6:-:34047480_34047553	1.26
novel_mir879	106	miRNA	NC_000072.6:+:72773361_72773444	4.32
novel_mir883	19	miRNA	NC_000074.6:-:128549916_128549957	0.77
novel_mir887	30	miRNA	NC_000071.6:+:140105612_140105671	1.22
novel_mir894	43	miRNA	NC_000079.6:-:15940170_15940218	1.75
novel_mir895	201	miRNA	NC_000075.6:-:76026100_76026170	8.19
novel_mir898	36	miRNA	NC_000067.6:-:4134715_4134786	1.47
novel_mir227	121	miRNA	NC_000073.6:-:35409644_35409703	4.93
novel_mir900	76	miRNA	NC_000075.6:-:21960610_21960672	3.1
novel_mir901	45	miRNA	NC_000074.6:+:13350569_13350631	1.83
novel_mir903	44	miRNA	NC_000077.6:-:98704208_98704287	1.79
novel_mir904	52	miRNA	NC_000068.7:-:112384829_112384907	2.12
novel_mir905	69	miRNA	NC_000086.7:+:101522533_101522603	2.81
novel_mir906	105	miRNA	NC_000067.6:+:132130697_132130781	4.28
novel_mir908	136	miRNA	NC_000079.6:-:34479004_34479043	5.54
novel_mir912	344	miRNA	NC_000068.7:-:173564818_173564864	14.02
novel_mir914	59	miRNA	NC_000079.6:-:90061724_90061824	2.4
novel_mir916	468	miRNA	NC_000067.6:-:63994402_63994469	19.07
novel_mir917	24	miRNA	NC_000076.6:-:24217004_24217089	0.98
novel_mir918	36	miRNA	NC_000076.6:-:74986773_74986845	1.47
novel_mir354	11	miRNA	NC_000082.6:-:87553491_87553557	0.45
novel_mir926	29	miRNA	NC_000067.6:+:118676607_118676661	1.18
novel_mir927	23	miRNA	NC_000079.6:-:102753809_102753860	0.94
novel_mir168	26	miRNA	NC_000075.6:+:107627252_107627338	1.06
novel_mir929	82	miRNA	NC_000074.6:-:12872235_12872293	3.34
novel_mir930	26	miRNA	NC_000072.6:+:73065998_73066055	1.06
novel_mir934	35	miRNA	NC_000081.6:+:73192568_73192645	1.43
novel_mir935	44	miRNA	NC_000078.6:-:87866088_87866153	1.79
novel_mir944	73	miRNA	NC_000078.6:+:105762199_105762279	2.97
novel_mir946	16	miRNA	NC_000076.6:+:29466384_29466450	0.65
novel_mir950	42	miRNA	NC_000080.6:-:23899561_23899622	1.71
novel_mir956	67	miRNA	NC_000072.6:+:135949253_135949300	2.73
novel_mir959	26	miRNA	NC_000080.6:+:47064451_47064530	1.06
novel_mir961	18	miRNA	NC_000070.6:+:43703307_43703365	0.73
novel_mir962	20	miRNA	NC_000071.6:-:137126892_137126966	0.81
novel_mir963	26	miRNA	NC_000077.6:-:4276340_4276389	1.06
novel_mir967	11	miRNA	NC_000067.6:+:179596312_179596365	0.45
novel_mir969	28	miRNA	NC_000074.6:-:119407582_119407634	1.14
novel_mir902	38	miRNA	NC_000070.6:-:45500827_45500875	1.55
novel_mir970	27	miRNA	NC_000067.6:+:92161767_92161827	1.1
novel_mir973	185	miRNA	NC_000082.6:-:62854163_62854224	7.54
novel_mir975	67	miRNA	NC_000070.6:+:126497507_126497587	2.73
novel_mir984	45	miRNA	NC_000073.6:-:55689411_55689471	1.83
novel_mir987	31	miRNA	NC_000069.6:-:142165226_142165279	1.26
novel_mir991	49	miRNA	NC_000085.6:+:7275585_7275670	2
novel_mir997	110	miRNA	NC_000084.6:-:37855744_37855810	4.48
novel_mir999	24	miRNA	NC_000079.6:+:40558279_40558349	0.98
novel_mir1001	38	miRNA	NC_000068.7:-:181202249_181202326	1.55
novel_mir1003	38	miRNA	NC_000068.7:+:27020790_27020843	1.55
novel_mir1004	366	miRNA	NC_000078.6:-:100088854_100088926	14.91
novel_mir1006	49	miRNA	NC_000080.6:+:48423874_48423949	2
novel_mir1007	10	miRNA	NC_000082.6:+:32414964_32415041	0.41
novel_mir1008	43	miRNA	NC_000073.6:-:113910240_113910304	1.75
novel_mir1009	38	miRNA	NC_000068.7:+:25625360_25625435	1.55
novel_mir1011	277	miRNA	NC_000084.6:-:11143524_11143583	11.29
novel_mir1013	134	miRNA	NT_187027.1:-:1270585_1270645	5.46
novel_mir1016	71	miRNA	NC_000072.6:-:32976401_32976461	2.89
novel_mir1018	26	miRNA	NC_000071.6:+:88941946_88941998	1.06
novel_mir1020	19	miRNA	NC_000072.6:-:113182248_113182297	0.77
novel_mir1023	20	miRNA	NC_000072.6:+:73084653_73084696	0.81
novel_mir1024	20	miRNA	NC_000077.6:-:66235311_66235359	0.81
novel_mir1025	82	miRNA	NC_000084.6:+:42800815_42800882	3.34
novel_mir1028	18	miRNA	NC_000075.6:+:13898558_13898641	0.73
novel_mir1030	2109	miRNA	NC_000077.6:+:11967536_11967586	85.94
novel_mir1039	1110	miRNA	NC_000077.6:+:16508311_16508360	45.23
novel_mir1040	45	miRNA	NC_000081.6:+:88821598_88821652	1.83
novel_mir1049	14	miRNA	NC_000082.6:-:93351804_93351877	0.57
novel_mir1050	30	miRNA	NC_000075.6:+:34745931_34746010	1.22
novel_mir1051	20	miRNA	NC_000086.7:+:169106320_169106392	0.81
novel_mir174	129	miRNA	NC_000071.6:-:99728558_99728632	5.26
novel_mir1053	11	miRNA	NC_000071.6:+:52676141_52676192	0.45
novel_mir1058	22	miRNA	NC_000086.7:+:52278409_52278479	0.9
novel_mir1065	36	miRNA	NC_000071.6:+:114539082_114539130	1.47
novel_mir227	77	miRNA	NW_012132911.1:+:64920_64968	3.14
novel_mir1066	29	miRNA	NC_000070.6:-:48051513_48051558	1.18
novel_mir1068	36	miRNA	NC_000073.6:-:40944632_40944709	1.47
novel_mir1073	31	miRNA	NC_000071.6:+:120318487_120318534	1.26
novel_mir1074	12	miRNA	NC_000076.6:-:127084952_127085016	0.49
novel_mir1077	40	miRNA	NC_000068.7:+:104574868_104574924	1.63
novel_mir1078	38	miRNA	NC_000073.6:+:23728023_23728084	1.55
novel_mir1084	33	miRNA	NC_000069.6:-:146648857_146648904	1.34
novel_mir1085	130	miRNA	NC_000083.6:+:66703455_66703546	5.3
novel_mir1086	3230	miRNA	NC_000085.6:-:46319638_46319697	131.62
novel_mir1088	36	miRNA	NC_000072.6:+:32017991_32018052	1.47
novel_mir1093	19	miRNA	NC_000074.6:+:86523461_86523527	0.77
novel_mir1094	75	miRNA	NC_000073.6:-:125451652_125451706	3.06
novel_mir1101	138	miRNA	NC_000084.6:-:78740467_78740547	5.62
novel_mir1105	15	miRNA	NC_000080.6:-:25560878_25560947	0.61
novel_mir1106	58	miRNA	NC_000067.6:-:164936279_164936315	2.36
novel_mir1107	119	miRNA	NC_000084.6:+:45140527_45140608	4.85
novel_mir1113	24	miRNA	NC_000081.6:+:79934284_79934345	0.98
novel_mir1115	48	miRNA	NC_000067.6:-:42658196_42658246	1.96
novel_mir1119	52	miRNA	NC_000073.6:+:65955559_65955613	2.12
novel_mir1121	25	miRNA	NC_000068.7:+:172577117_172577177	1.02
novel_mir1125	610	miRNA	NC_000081.6:-:36506040_36506113	24.86
novel_mir1129	117	miRNA	NC_000068.7:-:4063424_4063514	4.77
novel_mir905	482	miRNA	NC_000086.7:+:101522578_101522643	19.64
novel_mir1131	28	miRNA	NC_000070.6:-:107349672_107349721	1.14
novel_mir1132	13	miRNA	NC_000077.6:+:78202948_78203006	0.53
novel_mir1133	28	miRNA	NC_000077.6:+:94942817_94942889	1.14
novel_mir1135	33	miRNA	NC_000077.6:-:74407425_74407480	1.34
novel_mir1136	24	miRNA	NC_000071.6:+:117641326_117641399	0.98
novel_mir1142	20	miRNA	NC_000083.6:-:6165579_6165644	0.81
novel_mir1149	43	miRNA	NC_000079.6:-:113226891_113226940	1.75
novel_mir1150	320	miRNA	NC_000079.6:-:73470659_73470735	13.04
novel_mir1160	259	miRNA	NC_000069.6:+:107159414_107159476	10.55
novel_mir1168	31	miRNA	NC_000077.6:-:118379027_118379073	1.26
novel_mir1171	16	miRNA	NC_000074.6:-:121109557_121109614	0.65
novel_mir1172	13	miRNA	NC_000084.6:-:70408736_70408799	0.53
novel_mir1175	70	miRNA	NC_000073.6:-:139397751_139397812	2.85
novel_mir1176	1160	miRNA	NC_000073.6:+:79744777_79744843	47.27
novel_mir858	206	miRNA	NC_000070.6:+:100095844_100095929	8.39
novel_mir332	30	miRNA	NC_000070.6:+:12342414_12342493	1.22
novel_mir1178	787	miRNA	NC_000079.6:-:113691771_113691845	32.07
novel_mir1180	87	miRNA	NC_000067.6:-:63767118_63767168	3.55
novel_mir1051	83	miRNA	NC_000086.7:+:169106371_169106446	3.38
novel_mir1186	24	miRNA	NC_000079.6:-:64184658_64184717	0.98
novel_mir1191	66	miRNA	NC_000083.6:+:29058581_29058651	2.69
novel_mir1193	25	miRNA	NC_000075.6:+:27093041_27093109	1.02
novel_mir1198	21	miRNA	NC_000075.6:-:49122344_49122383	0.86
novel_mir1203	160	miRNA	NC_000068.7:-:168637240_168637283	6.52
novel_mir1204	257	miRNA	NC_000067.6:+:41072009_41072084	10.47
novel_mir1206	40	miRNA	NC_000076.6:+:118386961_118387052	1.63
novel_mir1207	24	miRNA	NC_000082.6:-:94070082_94070138	0.98
novel_mir1208	19	miRNA	NC_000071.6:+:114004855_114004913	0.77
novel_mir1209	36	miRNA	NC_000073.6:-:144759093_144759139	1.47
novel_mir1211	1305	miRNA	NC_000076.6:-:43412389_43412491	53.18
novel_mir1212	78	miRNA	NC_000072.6:-:81452979_81453048	3.18
novel_mir1213	39	miRNA	NC_000076.6:+:117605279_117605354	1.59
novel_mir1214	18	miRNA	NC_000073.6:-:107382914_107382977	0.73
novel_mir1217	35	miRNA	NC_000073.6:-:101417278_101417366	1.43
novel_mir1218	10	miRNA	NC_000075.6:+:45944253_45944323	0.41
novel_mir1221	35	miRNA	NC_000069.6:+:101455663_101455726	1.43
novel_mir1223	14	miRNA	NC_000085.6:+:41030010_41030068	0.57
novel_mir1226	23	miRNA	NC_000071.6:-:140654143_140654217	0.94
novel_mir332	26	miRNA	NC_000073.6:+:118798544_118798627	1.06
novel_mir227	240	miRNA	NC_000073.6:-:30751324_30751387	9.78
novel_mir1229	31	miRNA	NC_000067.6:-:90906939_90907018	1.26
novel_mir1230	41	miRNA	NC_000074.6:-:14958146_14958224	1.67
novel_mir1231	70	miRNA	NC_000084.6:+:24583060_24583130	2.85
novel_mir1232	12	miRNA	NC_000078.6:-:102544179_102544221	0.49
novel_mir1233	82	miRNA	NC_000072.6:-:6459429_6459489	3.34
novel_mir1237	27	miRNA	NC_000071.6:-:56968635_56968705	1.1
novel_mir1239	23	miRNA	NC_000080.6:+:89263332_89263416	0.94
novel_mir1241	67	miRNA	NC_000067.6:-:20557806_20557873	2.73
novel_mir1242	246	miRNA	NC_000072.6:+:93410002_93410054	10.02
novel_mir1244	22	miRNA	NC_000068.7:-:157180254_157180325	0.9
novel_mir1246	12	miRNA	NC_000078.6:+:87098435_87098502	0.49
novel_mir1249	31	miRNA	NC_000068.7:-:3662014_3662067	1.26
novel_mir1250	29	miRNA	NC_000077.6:-:119718494_119718582	1.18
novel_mir1253	27	miRNA	NC_000068.7:-:73440113_73440158	1.1
novel_mir1255	28	miRNA	NC_000069.6:-:130404699_130404751	1.14
novel_mir1258	20	miRNA	NC_000075.6:-:64352597_64352684	0.81
novel_mir1266	27	miRNA	NC_000069.6:+:127646567_127646623	1.1
novel_mir1270	34	miRNA	NC_000078.6:+:70629009_70629066	1.39
novel_mir1275	30	miRNA	NC_000072.6:-:127998200_127998280	1.22
novel_mir1278	18	miRNA	NC_000080.6:-:64557718_64557784	0.73
novel_mir1281	11	miRNA	NC_000077.6:-:110385167_110385235	0.45
novel_mir1282	4389	miRNA	NC_000084.6:-:5602308_5602382	178.85
novel_mir1047	35	miRNA	NC_000077.6:-:5998523_5998598	1.43
novel_mir1286	29	miRNA	NC_000075.6:-:107681411_107681490	1.18
novel_mir1288	38	miRNA	NC_000070.6:+:48367713_48367786	1.55
novel_mir1290	43	miRNA	NC_000070.6:-:150767093_150767140	1.75
novel_mir1291	103	miRNA	NC_000085.6:+:48128493_48128553	4.2
novel_mir1292	21	miRNA	NC_000082.6:-:6377339_6377407	0.86
novel_mir1294	210	miRNA	NC_000086.7:+:150565091_150565173	8.56
novel_mir1295	23	miRNA	NC_000068.7:+:74811215_74811294	0.94
novel_mir1297	19	miRNA	NC_000067.6:-:63110781_63110826	0.77
novel_mir1301	37	miRNA	NC_000082.6:-:20508164_20508229	1.51
novel_mir1302	40	miRNA	NC_000085.6:-:52631597_52631652	1.63
novel_mir1308	25	miRNA	NC_000076.6:+:7334749_7334813	1.02
novel_mir1311	36	miRNA	NC_000073.6:-:30699751_30699787	1.47
novel_mir1312	23	miRNA	NC_000069.6:-:109019806_109019875	0.94
novel_mir1317	22	miRNA	NC_000069.6:-:37987591_37987666	0.9
novel_mir1318	13	miRNA	NC_000071.6:-:74861491_74861559	0.53
novel_mir1212	82	miRNA	NC_000072.6:-:81453029_81453095	3.34
novel_mir1324	36	miRNA	NC_000067.6:-:190992898_190992960	1.47
novel_mir1325	19	miRNA	NC_000068.7:+:6319146_6319209	0.77
novel_mir1326	71	miRNA	NC_000067.6:+:135880358_135880422	2.89
novel_mir1334	45	miRNA	NC_000073.6:-:143926195_143926238	1.83
novel_mir1337	63	miRNA	NC_000069.6:-:27344092_27344157	2.57
novel_mir1339	78	miRNA	NC_000075.6:-:110390188_110390252	3.18
novel_mir1343	17	miRNA	NC_000074.6:-:26983678_26983742	0.69
novel_mir1348	46	miRNA	NC_000076.6:-:41578194_41578252	1.87
novel_mir1351	70	miRNA	NC_000068.7:-:146428224_146428310	2.85
novel_mir1352	1135	miRNA	NC_000072.6:+:147604643_147604718	46.25
novel_mir1354	65	miRNA	NC_000067.6:+:148397864_148397919	2.65
novel_mir1357	31	miRNA	NC_000075.6:-:117264302_117264349	1.26
novel_mir1359	729	miRNA	NC_000084.6:-:26874268_26874351	29.71
novel_mir1365	49	miRNA	NC_000073.6:-:141534450_141534506	2
novel_mir1367	22	miRNA	NC_000076.6:-:77183719_77183792	0.9
novel_mir1368	103	miRNA	NC_000073.6:-:136790436_136790483	4.2
novel_mir1369	29	miRNA	NC_000080.6:-:95706449_95706531	1.18
novel_mir1370	32	miRNA	NC_000081.6:+:46464860_46464912	1.3
novel_mir1371	34	miRNA	NC_000072.6:+:85892963_85893036	1.39
novel_mir1373	37	miRNA	NC_000084.6:+:33634909_33634960	1.51
novel_mir1374	153	miRNA	NC_000070.6:-:153959753_153959840	6.23
novel_mir1376	10	miRNA	NC_000071.6:+:150883813_150883862	0.41
novel_mir1377	52	miRNA	NC_000077.6:-:69226435_69226499	2.12
novel_mir1380	99	miRNA	NC_000070.6:+:127984683_127984746	4.03
novel_mir1381	49	miRNA	NC_000086.7:+:102805139_102805203	2
novel_mir1385	63	miRNA	NC_000072.6:+:84123266_84123321	2.57
novel_mir1389	41	miRNA	NC_000081.6:+:18806681_18806768	1.67
novel_mir1390	51	miRNA	NC_000082.6:-:87494270_87494322	2.08
novel_mir1393	24	miRNA	NC_000072.6:+:89389377_89389455	0.98
novel_mir1399	49	miRNA	NC_000077.6:-:71986464_71986533	2
novel_mir1400	32	miRNA	NC_000075.6:+:30844155_30844201	1.3
novel_mir1403	129	miRNA	NC_000072.6:-:101114298_101114354	5.26
novel_mir1408	30	miRNA	NC_000079.6:-:13845266_13845329	1.22
novel_mir1411	108	miRNA	NC_000079.6:-:63680229_63680308	4.4
novel_mir1414	26	miRNA	NC_000083.6:+:35514712_35514759	1.06
novel_mir1415	22	miRNA	NC_000068.7:+:141231099_141231186	0.9
novel_mir1419	54	miRNA	NC_000078.6:-:4088503_4088567	2.2
novel_mir1424	12	miRNA	NC_000067.6:-:186225899_186225979	0.49
novel_mir1425	21	miRNA	NC_000077.6:-:69609620_69609679	0.86
novel_mir1431	865	miRNA	NC_000084.6:+:62347452_62347512	35.25
novel_mir1441	33	miRNA	NC_000068.7:-:28368134_28368206	1.34
novel_mir1443	81	miRNA	NC_000083.6:+:45772919_45772993	3.3
novel_mir1445	16	miRNA	NC_000070.6:-:32964106_32964190	0.65
novel_mir1446	65	miRNA	NC_000078.6:+:76799627_76799664	2.65
novel_mir1450	173	miRNA	NC_000082.6:+:94335839_94335904	7.05
novel_mir227	24	miRNA	NC_000085.6:+:47753056_47753103	0.98
novel_mir1451	27	miRNA	NC_000077.6:-:106350527_106350578	1.1
novel_mir1456	41	miRNA	NC_000076.6:-:127312380_127312443	1.67
novel_mir1466	46	miRNA	NC_000073.6:+:96797287_96797356	1.87
novel_mir1468	20	miRNA	NC_000068.7:-:167868946_167868999	0.81
novel_mir601	34	miRNA	NC_000083.6:-:6454884_6454957	1.39
novel_mir1472	27	miRNA	NC_000072.6:+:137800531_137800588	1.1
novel_mir1473	48	miRNA	NC_000083.6:+:71740848_71740890	1.96
novel_mir1475	21	miRNA	NC_000069.6:+:7803385_7803446	0.86
novel_mir1477	38	miRNA	NC_000084.6:-:46875349_46875424	1.55
novel_mir1482	29	miRNA	NC_000074.6:-:124053229_124053273	1.18
novel_mir1485	26	miRNA	NC_000068.7:-:75021724_75021772	1.06
novel_mir1487	60	miRNA	NC_000079.6:+:57592470_57592525	2.44
novel_mir1488	151	miRNA	NC_000073.6:-:45030906_45030989	6.15
novel_mir1489	133	miRNA	NC_000079.6:+:13687635_13687725	5.42
novel_mir448	99	miRNA	NC_000070.6:+:151956541_151956624	4.03
novel_mir1495	36	miRNA	NC_000068.7:-:32421147_32421216	1.47
novel_mir1497	81	miRNA	NC_000086.7:-:14615739_14615824	3.3
novel_mir1500	42	miRNA	NC_000077.6:+:85923572_85923654	1.71
novel_mir1502	85	miRNA	NC_000068.7:-:3748926_3748993	3.46
novel_mir1503	127	miRNA	NC_000075.6:-:118888874_118888931	5.18
novel_mir1504	37	miRNA	NC_000068.7:+:91983208_91983284	1.51
novel_mir1507	118	miRNA	NC_000086.7:+:7728029_7728072	4.81
novel_mir1509	27	miRNA	NC_000070.6:-:132055403_132055465	1.1
novel_mir1514	37	miRNA	NC_000084.6:-:37343235_37343308	1.51
novel_mir1516	214	miRNA	NC_000078.6:+:65421010_65421080	8.72
novel_mir1517	31	miRNA	NC_000080.6:-:17782379_17782426	1.26
novel_mir142	232	miRNA	NC_000085.6:-:46044673_46044751	9.45
novel_mir1518	27	miRNA	NT_187024.1:+:73453_73501	1.1
novel_mir1519	35	miRNA	NC_000084.6:+:32419155_32419229	1.43
novel_mir1523	124	miRNA	NC_000067.6:-:159842557_159842618	5.05
novel_mir1527	23	miRNA	NC_000077.6:+:107560200_107560260	0.94
novel_mir1531	224	miRNA	NC_000072.6:-:63079480_63079574	9.13
novel_mir1535	533	miRNA	NC_000071.6:+:39248474_39248514	21.72
novel_mir1540	35	miRNA	NC_000067.6:+:78034248_78034310	1.43
novel_mir1544	57	miRNA	NC_000080.6:-:24975547_24975616	2.32
novel_mir1545	50	miRNA	NC_000076.6:-:40267947_40268036	2.04
novel_mir1546	120	miRNA	NT_187023.1:+:134499_134574	4.89
novel_mir1551	48	miRNA	NC_000077.6:+:88881508_88881555	1.96
novel_mir1552	135	miRNA	NC_000073.6:-:54702419_54702492	5.5
novel_mir1553	12	miRNA	NC_000083.6:+:3346772_3346853	0.49
novel_mir1554	24	miRNA	NC_000075.6:+:51242966_51243042	0.98
novel_mir1557	69	miRNA	NC_000084.6:+:84134505_84134585	2.81
novel_mir1559	17	miRNA	NC_000084.6:-:82493885_82493966	0.69
novel_mir1565	44	miRNA	NC_000075.6:-:113489507_113489552	1.79
novel_mir1566	56	miRNA	NC_000072.6:-:94943283_94943366	2.28
novel_mir227	36	miRNA	NC_000075.6:-:119941103_119941159	1.47
novel_mir1571	123	miRNA	NC_000074.6:-:17289628_17289696	5.01
novel_mir1572	24	miRNA	NC_000076.6:-:126935308_126935392	0.98
novel_mir1574	30	miRNA	NC_000082.6:-:17830366_17830415	1.22
novel_mir1575	1687	miRNA	NC_000079.6:-:56221062_56221119	68.74
novel_mir1576	27	miRNA	NC_000071.6:-:92396987_92397060	1.1
novel_mir1577	14	miRNA	NC_000073.6:-:40525701_40525766	0.57
novel_mir1579	56	miRNA	NC_000086.7:-:36856580_36856650	2.28
novel_mir1583	28	miRNA	NC_000072.6:-:108232979_108233046	1.14
novel_mir1584	22	miRNA	NC_000077.6:-:11394826_11394866	0.9
novel_mir1589	101	miRNA	NC_000069.6:+:95384184_95384270	4.12
novel_mir1593	50	miRNA	NC_000084.6:+:36778854_36778900	2.04
novel_mir1596	335	miRNA	NC_000077.6:+:78845717_78845812	13.65
novel_mir1597	26	miRNA	NC_000073.6:+:113795332_113795404	1.06
novel_mir1598	11	miRNA	NC_000075.6:+:63831217_63831301	0.45
novel_mir1609	22	miRNA	NC_000071.6:-:148127942_148127997	0.9
novel_mir1611	132	miRNA	NC_000086.7:+:67762534_67762608	5.38
novel_mir1619	43	miRNA	NC_000067.6:-:59280049_59280123	1.75
novel_mir1621	32	miRNA	NC_000079.6:-:103355828_103355875	1.3
novel_mir1623	17	miRNA	NC_000074.6:+:93842795_93842878	0.69
novel_mir1624	15	miRNA	NC_000075.6:-:108500119_108500177	0.61
novel_mir1626	13	miRNA	NC_000073.6:-:19665919_19665956	0.53
novel_mir22	13	miRNA	NC_000072.6:-:72807349_72807407	0.53
novel_mir1632	56	miRNA	NC_000067.6:+:125561683_125561739	2.28
novel_mir1634	60	miRNA	NC_000080.6:-:66892527_66892569	2.44
novel_mir1636	16	miRNA	NC_000068.7:+:91763640_91763707	0.65
novel_mir1637	26	miRNA	NC_000073.6:+:102210338_102210419	1.06
novel_mir1638	30	miRNA	NC_000073.6:-:80098871_80098935	1.22
novel_mir1641	65	miRNA	NC_000083.6:+:66130558_66130641	2.65
novel_mir1644	42	miRNA	NC_000081.6:+:86744642_86744707	1.71
novel_mir1646	60	miRNA	NC_000081.6:+:20042889_20042939	2.44
novel_mir1647	58	miRNA	NC_000071.6:+:148398961_148399043	2.36
novel_mir1648	24	miRNA	NC_000073.6:-:126113595_126113675	0.98
novel_mir1652	39	miRNA	NC_000071.6:-:48321155_48321223	1.59
novel_mir1653	187	miRNA	NC_000085.6:+:8691640_8691715	7.62
novel_mir1537	132	miRNA	NC_000074.6:-:104412846_104412915	5.38
novel_mir1657	15	miRNA	NC_000084.6:+:69369494_69369550	0.61
novel_mir1658	22	miRNA	NC_000077.6:+:29468828_29468870	0.9
novel_mir1659	45	miRNA	NC_000075.6:-:55107186_55107249	1.83
novel_mir337	44	miRNA	NC_000074.6:+:84033880_84033963	1.79
novel_mir1667	31	miRNA	NC_000069.6:-:149107186_149107254	1.26
novel_mir1668	64	miRNA	NC_000068.7:+:146832776_146832852	2.61
novel_mir1669	21	miRNA	NC_000069.6:+:112254063_112254116	0.86
novel_mir1670	51	miRNA	NC_000077.6:+:80199178_80199233	2.08
novel_mir1679	43	miRNA	NC_000068.7:+:18065925_18066009	1.75
novel_mir1685	198	miRNA	NC_000079.6:-:95861396_95861446	8.07
novel_mir1691	31	miRNA	NC_000084.6:-:74197050_74197100	1.26
novel_mir1692	15	miRNA	NC_000071.6:+:68747329_68747387	0.61
novel_mir1696	45	miRNA	NC_000074.6:-:88541051_88541094	1.83
novel_mir1698	87	miRNA	NC_000072.6:-:55078581_55078654	3.55
novel_mir1700	36	miRNA	NC_000085.6:+:27118937_27119002	1.47
novel_mir816	31	miRNA	NC_000072.6:+:108668903_108668974	1.26
novel_mir1708	43	miRNA	NC_000085.6:-:7406036_7406105	1.75
novel_mir1709	168	miRNA	NC_000073.6:+:130759319_130759385	6.85
novel_mir1711	94	miRNA	NC_000072.6:+:125875940_125875989	3.83
novel_mir1714	168	miRNA	NC_000070.6:-:108330946_108331005	6.85
novel_mir1719	25	miRNA	NC_000071.6:+:33378000_33378073	1.02
novel_mir1720	326	miRNA	NC_000080.6:-:25292810_25292889	13.28
novel_mir1724	11	miRNA	NC_000071.6:+:140163616_140163657	0.45
novel_mir1728	51	miRNA	NC_000068.7:-:90561578_90561664	2.08
novel_mir1730	220	miRNA	NC_000081.6:-:83817532_83817591	8.96
novel_mir1733	67	miRNA	NC_000077.6:-:117150287_117150335	2.73
novel_mir1740	36	miRNA	NC_000067.6:-:179474908_179474961	1.47
novel_mir1741	10	miRNA	NC_000067.6:-:178711590_178711663	0.41
novel_mir1742	32	miRNA	NC_000072.6:-:80925562_80925614	1.3
novel_mir1744	20	miRNA	NC_000081.6:-:88024592_88024674	0.81
novel_mir1748	33	miRNA	NC_000076.6:-:13811164_13811225	1.34
novel_mir1749	144	miRNA	NC_000072.6:+:134335093_134335171	5.87
novel_mir1750	18	miRNA	NC_000078.6:+:12316111_12316186	0.73
novel_mir1121	25	miRNA	NC_000068.7:+:172577064_172577135	1.02
novel_mir1762	135	miRNA	NC_000086.7:+:96092486_96092561	5.5
novel_mir890	18	miRNA	NC_000079.6:-:75069072_75069141	0.73
novel_mir1773	27	miRNA	NC_000075.6:+:119742991_119743048	1.1
novel_mir1777	18	miRNA	NC_000083.6:+:23661557_23661622	0.73
novel_mir1778	29	miRNA	NC_000071.6:+:148272611_148272647	1.18
novel_mir630	54	miRNA	NC_000068.7:-:82220438_82220505	2.2
novel_mir1779	40	miRNA	NC_000076.6:-:62846307_62846350	1.63
novel_mir1640	144	miRNA	NC_000079.6:-:56115380_56115429	5.87
novel_mir1783	30	miRNA	NC_000082.6:-:30505904_30505951	1.22
novel_mir1787	41	miRNA	NC_000071.6:-:45546271_45546355	1.67
novel_mir1791	30	miRNA	NC_000077.6:+:120489564_120489628	1.22
novel_mir1792	151	miRNA	NC_000068.7:+:160479522_160479574	6.15
novel_mir1793	26	miRNA	NC_000070.6:-:57539707_57539756	1.06
novel_mir1795	28	miRNA	NC_000086.7:-:127664770_127664844	1.14
novel_mir300	16	miRNA	NC_000077.6:-:108075363_108075454	0.65
novel_mir1798	497	miRNA	NC_000086.7:+:69994653_69994706	20.25
novel_mir1804	25	miRNA	NC_000067.6:+:149940407_149940468	1.02
novel_mir1813	168	miRNA	NC_000076.6:-:62349673_62349723	6.85
novel_mir1814	23	miRNA	NC_000075.6:-:56837903_56837992	0.94
novel_mir1817	179	miRNA	NC_000070.6:+:53616975_53617014	7.29
novel_mir1820	37	miRNA	NC_000079.6:-:29386735_29386786	1.51
novel_mir1821	49	miRNA	NC_000076.6:+:29781556_29781599	2
novel_mir1822	45	miRNA	NC_000076.6:+:99196774_99196852	1.83
novel_mir1824	39	miRNA	NC_000083.6:+:72205922_72205982	1.59
novel_mir1827	32	miRNA	NC_000079.6:+:69699211_69699261	1.3
novel_mir1828	25	miRNA	NC_000071.6:-:74766902_74766946	1.02
novel_mir1830	12	miRNA	NC_000072.6:+:67421604_67421651	0.49
novel_mir1831	37	miRNA	NC_000074.6:+:79328267_79328339	1.51
novel_mir1836	11	miRNA	NC_000067.6:+:69694807_69694867	0.45
novel_mir1839	18	miRNA	NC_000068.7:-:171132576_171132646	0.73
novel_mir1840	61	miRNA	NC_000084.6:-:76024631_76024710	2.49
novel_mir1841	40	miRNA	NC_000067.6:-:188891605_188891647	1.63
novel_mir1846	32	miRNA	NC_000086.7:-:147141143_147141232	1.3
novel_mir1848	23	miRNA	NC_000069.6:-:51907760_51907811	0.94
novel_mir1853	23	miRNA	NC_000079.6:-:41020102_41020183	0.94
novel_mir1854	45	miRNA	NC_000068.7:-:167384262_167384316	1.83
novel_mir1861	38	miRNA	NC_000068.7:-:142785883_142785948	1.55
novel_mir1862	30	miRNA	NC_000085.6:+:29754687_29754757	1.22
novel_mir1863	221	miRNA	NC_000084.6:+:12769863_12769950	9.01
novel_mir1864	12	miRNA	NC_000073.6:-:75384473_75384561	0.49
novel_mir1867	111	miRNA	NC_000067.6:+:138701294_138701362	4.52
novel_mir1871	39	miRNA	NC_000074.6:+:111090661_111090739	1.59
novel_mir1873	44	miRNA	NC_000068.7:+:10142922_10142995	1.79
novel_mir1875	21	miRNA	NC_000074.6:-:80836717_80836807	0.86
novel_mir1877	229	miRNA	NC_000067.6:+:125404261_125404325	9.33
novel_mir1882	47	miRNA	NC_000070.6:+:125420344_125420398	1.92
novel_mir1884	30	miRNA	NC_000071.6:+:123203358_123203424	1.22
novel_mir1694	56	miRNA	NT_187025.1:+:452852_452930	2.28
novel_mir1889	63	miRNA	NC_000079.6:-:11147005_11147054	2.57
novel_mir1890	38	miRNA	NC_000074.6:-:76146544_76146595	1.55
novel_mir1894	48	miRNA	NC_000081.6:-:100908654_100908724	1.96
novel_mir1903	31	miRNA	NC_000069.6:-:88147979_88148035	1.26
novel_mir1909	140	miRNA	NC_000085.6:+:30832107_30832180	5.7
novel_mir1910	20	miRNA	NC_000074.6:+:46769621_46769695	0.81
novel_mir1912	46	miRNA	NC_000071.6:+:46441806_46441885	1.87
novel_mir1920	537	miRNA	NC_000077.6:-:113662198_113662258	21.88
novel_mir1924	24	miRNA	NC_000075.6:+:92715363_92715412	0.98
novel_mir1928	34	miRNA	NC_000067.6:+:144083795_144083878	1.39
novel_mir1930	56	miRNA	NC_000075.6:-:31490369_31490445	2.28
novel_mir1946	137	miRNA	NC_000072.6:+:81868897_81868960	5.58
novel_mir1947	39	miRNA	NC_000070.6:+:141522227_141522294	1.59
novel_mir1095	33	miRNA	NC_000077.6:+:85706284_85706335	1.34
novel_mir1953	23	miRNA	NC_000082.6:-:83168706_83168771	0.94
novel_mir1955	51	miRNA	NC_000068.7:-:157920238_157920294	2.08
novel_mir1956	98	miRNA	NC_000068.7:-:32922850_32922933	3.99
novel_mir1958	36	miRNA	NC_000070.6:-:79542830_79542895	1.47
novel_mir1959	39	miRNA	NC_000072.6:-:127754070_127754152	1.59
novel_mir1962	24	miRNA	NC_000082.6:-:34282516_34282605	0.98
novel_mir1966	93	miRNA	NC_000086.7:+:66969560_66969621	3.79
novel_mir1968	14	miRNA	NC_000075.6:-:86570556_86570621	0.57
novel_mir1971	477	miRNA	NC_000071.6:+:99512682_99512765	19.44
novel_mir1974	49	miRNA	NC_000074.6:-:61913047_61913132	2
novel_mir1976	23	miRNA	NT_187004.1:-:2794196_2794263	0.94
novel_mir1977	39	miRNA	NC_000073.6:-:71924765_71924840	1.59
novel_mir1981	26	miRNA	NC_000068.7:-:25294123_25294162	1.06
novel_mir1982	18	miRNA	NC_000069.6:-:96600966_96601032	0.73
novel_mir1985	28	miRNA	NC_000071.6:-:115851818_115851879	1.14
novel_mir1987	28	miRNA	NC_000079.6:-:50990273_50990346	1.14
novel_mir1989	58	miRNA	NC_000080.6:-:68930734_68930782	2.36
novel_mir1990	45	miRNA	NC_000083.6:+:51018466_51018509	1.83
novel_mir1992	60	miRNA	NC_000068.7:+:115550223_115550291	2.44
novel_mir1993	29	miRNA	NC_000077.6:-:95948107_95948149	1.18
novel_mir1995	28	miRNA	NC_000082.6:+:96436912_96436974	1.14
novel_mir1463	31	miRNA	NC_000076.6:-:60540079_60540125	1.26
novel_mir1996	24	miRNA	NC_000079.6:-:48889940_48890006	0.98
novel_mir1997	69	miRNA	NC_000073.6:+:140957677_140957732	2.81
novel_mir2001	27	miRNA	NC_000067.6:+:64748649_64748738	1.1
novel_mir2003	62	miRNA	NC_000075.6:+:113644044_113644117	2.53
novel_mir2009	60	miRNA	NC_000075.6:+:80019767_80019818	2.44
novel_mir2011	12	miRNA	NC_000078.6:+:84284985_84285063	0.49
novel_mir2012	11	miRNA	NT_187023.1:+:1386318_1386363	0.45
novel_mir2015	28	miRNA	NC_000080.6:+:79234808_79234894	1.14
novel_mir2027	49	miRNA	NC_000067.6:-:177402976_177403041	2
novel_mir2029	17	miRNA	NC_000077.6:-:100331017_100331069	0.69
novel_mir2032	30	miRNA	NC_000079.6:+:23985849_23985924	1.22
novel_mir2036	96	miRNA	NC_000080.6:-:114460724_114460799	3.91
novel_mir2038	12	miRNA	NC_000069.6:+:150055820_150055873	0.49
novel_mir2043	26	miRNA	NC_000083.6:-:87570155_87570209	1.06
novel_mir2045	69	miRNA	NC_000079.6:+:95786451_95786520	2.81
novel_mir2047	47	miRNA	NC_000077.6:+:103790201_103790257	1.92
novel_mir2050	39	miRNA	NC_000070.6:+:137331307_137331366	1.59
novel_mir2053	38	miRNA	NC_000070.6:-:137908456_137908519	1.55
novel_mir2054	54	miRNA	NC_000070.6:-:116463625_116463677	2.2
novel_mir2056	23	miRNA	NC_000079.6:-:42812470_42812535	0.94
novel_mir2061	21	miRNA	NC_000078.6:+:76566154_76566196	0.86
novel_mir2064	26	miRNA	NC_000083.6:-:30445219_30445285	1.06
novel_mir2065	1284	miRNA	NC_000083.6:+:12675861_12675908	52.32
novel_mir2068	27	miRNA	NC_000075.6:+:63681566_63681611	1.1
novel_mir2069	19	miRNA	NC_000069.6:-:100287297_100287375	0.77
novel_mir1510	58	miRNA	NC_000070.6:+:66232950_66233024	2.36
novel_mir2079	4780	miRNA	NC_000072.6:+:89094370_89094444	194.78
novel_mir2080	37	miRNA	NC_000071.6:+:91076034_91076103	1.51
novel_mir2099	24	miRNA	NC_000070.6:+:148336601_148336681	0.98
novel_mir2100	44	miRNA	NC_000077.6:+:103273558_103273622	1.79
novel_mir2104	60	miRNA	NC_000084.6:+:30523231_30523276	2.44
novel_mir2109	33	miRNA	NC_000076.6:-:43429195_43429242	1.34
novel_mir2110	27	miRNA	NW_016097321.1:-:125731_125821	1.1
novel_mir2112	29	miRNA	NC_000070.6:-:108339155_108339198	1.18
novel_mir2114	80	miRNA	NC_000086.7:-:20715609_20715669	3.26
novel_mir2115	10	miRNA	NC_000073.6:-:19252633_19252720	0.41
novel_mir2116	15	miRNA	NC_000069.6:-:122777869_122777911	0.61
novel_mir2118	18	miRNA	NC_000067.6:+:36136460_36136502	0.73
novel_mir261	17	miRNA	NC_000073.6:-:121713979_121714052	0.69
novel_mir2121	12	miRNA	NC_000069.6:-:107910471_107910541	0.49
novel_mir2123	157	miRNA	NC_000082.6:+:90507758_90507814	6.4
novel_mir2124	28	miRNA	NC_000069.6:-:9244654_9244729	1.14
novel_mir2129	29	miRNA	NT_166305.2:+:884933_884998	1.18
novel_mir2132	1012	miRNA	NC_000075.6:-:74856116_74856160	41.24
novel_mir2133	21	miRNA	NC_000068.7:+:156952844_156952899	0.86
novel_mir2135	27	miRNA	NC_000069.6:-:124222289_124222350	1.1
novel_mir2141	136	miRNA	NC_000084.6:+:64157903_64157976	5.54
novel_mir2145	29	miRNA	NC_000071.6:-:117577720_117577794	1.18
novel_mir2147	29	miRNA	NC_000078.6:+:30021411_30021468	1.18
novel_mir2150	40	miRNA	NC_000072.6:+:30158201_30158278	1.63
novel_mir2155	29	miRNA	NC_000071.6:+:114355566_114355642	1.18
novel_mir1596	23	miRNA	NC_000070.6:-:3718599_3718661	0.94
novel_mir2163	54	miRNA	NC_000075.6:-:56854629_56854715	2.2
novel_mir2164	11	miRNA	NC_000085.6:+:11588336_11588408	0.45
novel_mir2167	27	miRNA	NC_000086.7:-:96616137_96616224	1.1
novel_mir2169	13	miRNA	NC_000072.6:-:28264234_28264286	0.53
novel_mir2175	57	miRNA	NC_000081.6:-:63716600_63716683	2.32
novel_mir2182	35	miRNA	NC_000067.6:+:39905064_39905125	1.43
novel_mir2183	13	miRNA	NC_000083.6:+:72940346_72940413	0.53
novel_mir2191	89	miRNA	NC_000070.6:-:137555611_137555682	3.63
novel_mir2200	18	miRNA	NC_000071.6:+:136107409_136107476	0.73
novel_mir2202	45	miRNA	NC_000086.7:-:42039161_42039206	1.83
novel_mir2207	25	miRNA	NC_000072.6:+:119270917_119270988	1.02
novel_mir2208	40	miRNA	NC_000070.6:+:17315256_17315337	1.63
novel_mir2210	11	miRNA	NC_000076.6:+:67210413_67210477	0.45
novel_mir2212	36	miRNA	NC_000083.6:+:46612837_46612923	1.47
novel_mir2215	919	miRNA	NC_000074.6:-:84768832_84768894	37.45
novel_mir1850	26	miRNA	NC_000071.6:+:140698913_140698975	1.06
novel_mir2219	50	miRNA	NC_000084.6:-:85360269_85360347	2.04
novel_mir2222	31	miRNA	NC_000067.6:+:171988908_171988959	1.26
novel_mir2223	28	miRNA	NC_000083.6:+:55975938_55975997	1.14
novel_mir2224	41	miRNA	NC_000077.6:-:103901884_103901961	1.67
novel_mir2226	23	miRNA	NC_000077.6:-:25694997_25695066	0.94
novel_mir2228	33	miRNA	NC_000079.6:-:73852248_73852328	1.34
novel_mir2231	33	miRNA	NC_000078.6:-:17589009_17589066	1.34
novel_mir2234	34	miRNA	NC_000073.6:+:121222339_121222383	1.39
novel_mir2243	29	miRNA	NC_000086.7:+:62183113_62183188	1.18
novel_mir2247	20	miRNA	NC_000072.6:-:132797477_132797565	0.81
novel_mir2249	10	miRNA	NC_000075.6:-:45382077_45382159	0.41
novel_mir2256	16	miRNA	NC_000071.6:+:139591285_139591358	0.65
novel_mir2259	25	miRNA	NC_000077.6:+:51868943_51868992	1.02
novel_mir2260	33	miRNA	NC_000077.6:+:119391983_119392048	1.34
novel_mir2261	15	miRNA	NC_000074.6:-:83869362_83869411	0.61
novel_mir2262	49	miRNA	NC_000073.6:-:119057111_119057169	2
novel_mir2264	36	miRNA	NC_000074.6:-:126188186_126188236	1.47
novel_mir2265	27	miRNA	NC_000076.6:-:60506441_60506515	1.1
novel_mir2268	113	miRNA	NC_000072.6:+:33863270_33863348	4.6
novel_mir2273	29	miRNA	NC_000078.6:-:107637427_107637483	1.18
novel_mir2279	30	miRNA	NC_000081.6:-:84842050_84842127	1.22
novel_mir2284	38	miRNA	NC_000077.6:+:51186164_51186217	1.55
novel_mir2287	25	miRNA	NC_000081.6:-:53758265_53758318	1.02
novel_mir2293	19	miRNA	NC_000074.6:-:118855835_118855893	0.77
novel_mir2298	154	miRNA	NC_000080.6:+:45901219_45901312	6.28
novel_mir2299	1240	miRNA	NC_000077.6:-:60176349_60176385	50.53
novel_mir2303	41	miRNA	NC_000075.6:+:42513473_42513563	1.67
novel_mir2308	62	miRNA	NC_000068.7:-:163764148_163764219	2.53
novel_mir2310	29	miRNA	NC_000083.6:+:66627547_66627634	1.18
novel_mir2313	18	miRNA	NC_000073.6:+:47103169_47103213	0.73
novel_mir2315	30	miRNA	NC_000073.6:+:63403801_63403859	1.22
novel_mir2321	98	miRNA	NC_000067.6:-:167673402_167673473	3.99
novel_mir2322	55	miRNA	NC_000068.7:-:51855463_51855517	2.24
novel_mir2330	31	miRNA	NC_000081.6:-:101031659_101031730	1.26
novel_mir1626	10	miRNA	NC_000070.6:-:141158222_141158263	0.41
novel_mir2334	30	miRNA	NC_000068.7:+:167890015_167890102	1.22
novel_mir2346	47	miRNA	NC_000070.6:+:69830444_69830496	1.92
novel_mir2347	13	miRNA	NC_000069.6:-:127202471_127202524	0.53
novel_mir2349	18	miRNA	NC_000082.6:+:17681861_17681933	0.73
novel_mir2350	13	miRNA	NC_000072.6:-:98715409_98715466	0.53
novel_mir2358	32	miRNA	NC_000075.6:+:30916557_30916615	1.3
novel_mir2362	10	miRNA	NC_000067.6:+:21418073_21418124	0.41
novel_mir2370	24	miRNA	NC_000073.6:-:98358354_98358411	0.98
novel_mir2371	24	miRNA	NC_000077.6:-:96279377_96279428	0.98
novel_mir2376	27	miRNA	NC_000067.6:-:132831057_132831126	1.1
novel_mir2377	30	miRNA	NC_000070.6:+:108356503_108356580	1.22
novel_mir2378	66	miRNA	NC_000067.6:+:39593078_39593151	2.69
novel_mir2379	686	miRNA	NC_000069.6:+:127021225_127021312	27.95
novel_mir2383	34	miRNA	NC_000072.6:+:128364525_128364596	1.39
novel_mir2392	28	miRNA	NT_187019.1:+:7630_7695	1.14
novel_mir2394	40	miRNA	NC_000074.6:-:93599819_93599878	1.63
novel_mir2400	23	miRNA	NC_000074.6:+:48444547_48444591	0.94
novel_mir2403	16	miRNA	NC_000084.6:+:34259625_34259668	0.65
novel_mir2031	66	miRNA	NC_000076.6:-:25522357_25522420	2.69
novel_mir2406	22	miRNA	NC_000071.6:-:6293853_6293906	0.9
novel_mir2407	37	miRNA	NC_000075.6:-:34760304_34760377	1.51
novel_mir2409	96	miRNA	NC_000080.6:+:21025294_21025382	3.91
novel_mir2101	258	miRNA	NC_000070.6:+:141778678_141778753	10.51
novel_mir2413	63	miRNA	NC_000073.6:+:116614873_116614936	2.57
novel_mir2414	43	miRNA	NC_000071.6:-:147008706_147008775	1.75
novel_mir2420	23	miRNA	NC_000081.6:+:77696054_77696115	0.94
novel_mir2422	30	miRNA	NC_000071.6:-:21121289_21121348	1.22
novel_mir2423	21	miRNA	NC_000071.6:-:131007185_131007269	0.86
novel_mir2424	48	miRNA	NC_000069.6:+:154293415_154293466	1.96
novel_mir2426	41	miRNA	NC_000076.6:-:74972836_74972924	1.67
novel_mir2428	32	miRNA	NC_000072.6:-:108142019_108142069	1.3
novel_mir2430	14	miRNA	NC_000072.6:-:122528375_122528453	0.57
novel_mir2431	10	miRNA	NC_000073.6:-:128902105_128902156	0.41
novel_mir2433	32	miRNA	NC_000076.6:-:92944472_92944537	1.3
novel_mir2436	20	miRNA	NC_000077.6:+:88365288_88365330	0.81
novel_mir2441	78	miRNA	NC_000071.6:-:42780873_42780934	3.18
novel_mir2443	31	miRNA	NC_000074.6:+:106406914_106406950	1.26
novel_mir2452	28	miRNA	NC_000067.6:+:105548166_105548252	1.14
novel_mir2460	32	miRNA	NT_187064.1:-:36617_36688	1.3
novel_mir238	29	miRNA	NC_000082.6:+:91904184_91904243	1.18
novel_mir2464	29	miRNA	NC_000073.6:-:109614472_109614549	1.18
novel_mir2466	10	miRNA	NC_000069.6:-:57954436_57954495	0.41
novel_mir2468	21	miRNA	NC_000084.6:-:69593756_69593835	0.86
novel_mir2476	209	miRNA	NC_000070.6:+:137527061_137527148	8.52
novel_mir2477	117	miRNA	NC_000085.6:-:52677438_52677524	4.77
novel_mir2483	52	miRNA	NC_000067.6:-:189158873_189158918	2.12
novel_mir712	30	miRNA	NC_000085.6:-:5059824_5059880	1.22
novel_mir2489	265	miRNA	NC_000070.6:-:57566617_57566676	10.8
novel_mir2490	48	miRNA	NC_000079.6:+:109806289_109806366	1.96
novel_mir2495	67	miRNA	NC_000070.6:-:82669122_82669162	2.73
novel_mir2501	29	miRNA	NC_000077.6:+:5105317_5105360	1.18
novel_mir2507	37	miRNA	NC_000068.7:-:125808422_125808479	1.51
novel_mir2513	35	miRNA	NC_000070.6:-:119058697_119058754	1.43
novel_mir2516	40	miRNA	NC_000082.6:+:10345804_10345852	1.63
novel_mir2519	51	miRNA	NC_000071.6:+:134531355_134531438	2.08
novel_mir2527	32	miRNA	NC_000070.6:-:28964147_28964215	1.3
novel_mir2530	29	miRNA	NC_000070.6:+:32993673_32993726	1.18
novel_mir2531	58	miRNA	NC_000079.6:-:118364024_118364093	2.36
novel_mir2535	234	miRNA	NC_000085.6:+:37656771_37656816	9.54
novel_mir2540	39	miRNA	NC_000077.6:-:20296575_20296614	1.59
novel_mir2542	19	miRNA	NC_000075.6:-:42037290_42037341	0.77
novel_mir2544	20	miRNA	NC_000067.6:-:165422087_165422153	0.81
novel_mir2545	32	miRNA	NC_000079.6:+:62410888_62410954	1.3
novel_mir2547	23	miRNA	NC_000085.6:-:50391390_50391452	0.94
novel_mir2548	30	miRNA	NC_000073.6:+:6043313_6043394	1.22
novel_mir2550	18	miRNA	NC_000080.6:-:87154653_87154714	0.73
novel_mir2555	31	miRNA	NC_000081.6:+:94190374_94190447	1.26
novel_mir2558	27	miRNA	NC_000079.6:+:31519384_31519447	1.1
novel_mir2560	32	miRNA	NC_000068.7:+:79397947_79397997	1.3
novel_mir2562	31	miRNA	NC_000081.6:-:57983909_57983988	1.26
novel_mir2564	79	miRNA	NC_000074.6:+:12915946_12916015	3.22
novel_mir2575	29	miRNA	NC_000077.6:-:10817338_10817386	1.18
novel_mir2577	28	miRNA	NC_000084.6:+:13527245_13527291	1.14
novel_mir2587	11	miRNA	NC_000077.6:+:22059056_22059111	0.45
novel_mir2593	32	miRNA	NC_000081.6:-:61507738_61507822	1.3
novel_mir2597	827	miRNA	NC_000075.6:-:12205861_12205966	33.7
novel_mir2598	10	miRNA	NC_000078.6:+:71299305_71299367	0.41
novel_mir2599	17	miRNA	NC_000082.6:-:30484211_30484280	0.69
novel_mir2601	51	miRNA	NC_000068.7:+:80339610_80339691	2.08
novel_mir2602	2968	miRNA	NC_000080.6:-:73487357_73487432	120.95
novel_mir2603	19	miRNA	NC_000070.6:+:114644485_114644542	0.77
novel_mir2605	16	miRNA	NC_000080.6:-:61986342_61986401	0.65
novel_mir606	26	miRNA	NC_000084.6:+:39822048_39822134	1.06
novel_mir2258	32	miRNA	NC_000085.6:-:60280780_60280853	1.3
novel_mir2611	68	miRNA	NC_000085.6:+:36098162_36098249	2.77
novel_mir2615	34	miRNA	NC_000068.7:+:127427768_127427827	1.39
novel_mir2618	290	miRNA	NC_000073.6:-:40412680_40412727	11.82
novel_mir2289	16	miRNA	NC_000078.6:-:18220673_18220729	0.65
novel_mir2621	41	miRNA	NC_000086.7:+:57163657_57163745	1.67
novel_mir2632	20	miRNA	NC_000067.6:+:43257859_43257947	0.81
novel_mir2634	21	miRNA	NC_000069.6:-:109451276_109451356	0.86
novel_mir2637	30	miRNA	NC_000067.6:+:31205749_31205807	1.22
novel_mir2639	13	miRNA	NC_000067.6:+:36105566_36105623	0.53
novel_mir2656	169	miRNA	NC_000070.6:+:122208994_122209048	6.89
novel_mir2657	90	miRNA	NC_000079.6:+:104867323_104867411	3.67
novel_mir227	23	miRNA	NC_000084.6:+:40114498_40114598	0.94
novel_mir2663	38	miRNA	NC_000072.6:-:125364395_125364438	1.55
novel_mir2671	59	miRNA	NC_000068.7:+:74712719_74712763	2.4
novel_mir2676	38	miRNA	NC_000068.7:-:10667795_10667864	1.55
novel_mir2677	37	miRNA	NC_000081.6:-:52036589_52036627	1.51
novel_mir2681	99	miRNA	NC_000075.6:-:53683504_53683553	4.03
novel_mir2682	25	miRNA	NC_000083.6:+:7999013_7999078	1.02
novel_mir2684	22	miRNA	NC_000081.6:-:79917632_79917710	0.9
novel_mir2295	12	miRNA	NC_000084.6:+:64305051_64305102	0.49
novel_mir764	676	miRNA	NC_000072.6:+:115346224_115346315	27.55
novel_mir2694	15	miRNA	NC_000071.6:+:35172063_35172124	0.61
novel_mir2698	34	miRNA	NC_000080.6:+:10043765_10043829	1.39
novel_mir2705	32	miRNA	NC_000078.6:+:117370273_117370362	1.3
novel_mir2707	24	miRNA	NC_000068.7:-:105419648_105419694	0.98
novel_mir2711	38	miRNA	NC_000083.6:-:87773841_87773901	1.55
novel_mir2712	40	miRNA	NC_000077.6:-:63780501_63780564	1.63
novel_mir2714	59	miRNA	NC_000069.6:-:102086514_102086591	2.4
novel_mir2717	26	miRNA	NC_000085.6:-:40301875_40301940	1.06
novel_mir2720	30	miRNA	NC_000082.6:-:35770235_35770319	1.22
novel_mir2722	103	miRNA	NC_000070.6:+:98104812_98104877	4.2
novel_mir238	28	miRNA	NC_000069.6:+:82640636_82640712	1.14
novel_mir2734	36	miRNA	NC_000081.6:-:59145056_59145115	1.47
novel_mir2748	37	miRNA	NC_000071.6:+:36084295_36084351	1.51
novel_mir2750	22	miRNA	NC_000075.6:-:54407222_54407295	0.9
novel_mir2759	47	miRNA	NC_000068.7:+:6209031_6209083	1.92
novel_mir2762	11	miRNA	NC_000071.6:+:141174451_141174519	0.45
novel_mir2764	472	miRNA	NC_000074.6:-:45524752_45524823	19.23
novel_mir2765	18	miRNA	NC_000080.6:+:78748939_78748978	0.73
novel_mir2768	21	miRNA	NC_000067.6:+:170645838_170645901	0.86
novel_mir2773	32	miRNA	NC_000071.6:-:130132701_130132754	1.3
novel_mir2779	79	miRNA	NC_000084.6:+:89170731_89170791	3.22
novel_mir2780	23	miRNA	NC_000079.6:-:61578120_61578185	0.94
novel_mir2783	32	miRNA	NC_000072.6:-:25481753_25481818	1.3
novel_mir2786	24	miRNA	NC_000079.6:-:99830321_99830386	0.98
novel_mir2803	102	miRNA	NW_016097317.1:-:379208_379274	4.16
novel_mir288	36	miRNA	NC_000073.6:+:79217444_79217483	1.47
novel_mir2826	353	miRNA	NC_000068.7:-:14434562_14434626	14.38
novel_mir2828	53	miRNA	NC_000073.6:+:43247046_43247100	2.16
novel_mir2829	43	miRNA	NC_000073.6:-:28699731_28699779	1.75
novel_mir2834	83	miRNA	NC_000077.6:+:80659346_80659428	3.38
novel_mir2838	40	miRNA	NC_000071.6:+:70488535_70488594	1.63
novel_mir2851	34	miRNA	NC_000081.6:-:78658407_78658464	1.39
novel_mir2852	29	miRNA	NC_000074.6:-:129174649_129174698	1.18
novel_mir2649	296	miRNA	NC_000081.6:+:10647205_10647268	12.06
novel_mir2868	28	miRNA	NC_000068.7:+:81609799_81609844	1.14
novel_mir2872	14	miRNA	NC_000072.6:+:61793679_61793757	0.57
novel_mir2874	42	miRNA	NC_000073.6:+:105444641_105444716	1.71
novel_mir2881	96	miRNA	NC_000073.6:+:98685880_98685951	3.91
novel_mir2883	76	miRNA	NC_000068.7:-:161795451_161795514	3.1
novel_mir2887	102	miRNA	NC_000082.6:+:23309161_23309219	4.16
novel_mir2901	55	miRNA	NC_000072.6:+:73965782_73965850	2.24
novel_mir2905	23	miRNA	NC_000067.6:+:87489639_87489707	0.94
novel_mir2906	44	miRNA	NC_000075.6:-:44245848_44245932	1.79
novel_mir2915	29	miRNA	NC_000067.6:-:113839241_113839289	1.18
novel_mir2916	48	miRNA	NC_000070.6:+:84964601_84964673	1.96
novel_mir1167	19	miRNA	NC_000071.6:-:147410096_147410155	0.77
novel_mir2920	38	miRNA	NC_000082.6:-:35612731_35612801	1.55
novel_mir2922	35	miRNA	NC_000076.6:-:92078754_92078843	1.43
novel_mir2925	12	miRNA	NC_000075.6:+:8910873_8910955	0.49
novel_mir2938	25	miRNA	NC_000071.6:+:50059410_50059482	1.02
novel_mir2943	68	miRNA	NC_000079.6:+:5704888_5704962	2.77
novel_mir2946	31	miRNA	NC_000074.6:+:119724390_119724465	1.26
novel_mir2951	11	miRNA	NC_000083.6:-:6951855_6951900	0.45
novel_mir2953	25	miRNA	NC_000085.6:-:48235024_48235070	1.02
novel_mir2958	10	miRNA	NC_000078.6:+:111993427_111993480	0.41
novel_mir2960	15	miRNA	NC_000083.6:-:50231609_50231655	0.61
novel_mir2972	51	miRNA	NC_000083.6:+:26686187_26686270	2.08
novel_mir2973	24	miRNA	NC_000069.6:-:62448357_62448435	0.98
novel_mir2976	60	miRNA	NC_000076.6:-:104061721_104061795	2.44
novel_mir1374	32	miRNA	NC_000070.6:-:153959821_153959869	1.3
novel_mir2984	26	miRNA	NC_000085.6:+:45325540_45325599	1.06
novel_mir2987	34	miRNA	NC_000071.6:+:73167303_73167381	1.39
novel_mir2990	44	miRNA	NC_000067.6:-:37476180_37476266	1.79
novel_mir738	22	miRNA	NC_000082.6:+:30053670_30053758	0.9
novel_mir2993	35	miRNA	NC_000070.6:-:82000039_82000097	1.43
novel_mir2662	118	miRNA	NC_000080.6:+:19203882_19203932	4.81
novel_mir1924	30	miRNA	NC_000075.6:+:92715388_92715442	1.22
novel_mir2999	45	miRNA	NC_000077.6:-:45567919_45568006	1.83
novel_mir3000	52	miRNA	NC_000071.6:+:134749535_134749589	2.12
novel_mir3003	101	miRNA	NC_000067.6:-:22073294_22073387	4.12
novel_mir3009	23	miRNA	NC_000086.7:+:59302104_59302172	0.94
novel_mir3011	16	miRNA	NC_000067.6:+:118900612_118900657	0.65
novel_mir3012	14	miRNA	NC_000069.6:-:108432139_108432198	0.57
novel_mir3017	14	miRNA	NC_000069.6:+:98100999_98101074	0.57
novel_mir3018	55	miRNA	NC_000082.6:-:35759854_35759931	2.24
novel_mir2858	43	miRNA	NC_000075.6:-:106724521_106724607	1.75
novel_mir3025	88	miRNA	NC_000073.6:-:112240870_112240952	3.59
novel_mir3030	120	miRNA	NC_000078.6:+:92533601_92533704	4.89
novel_mir3037	36	miRNA	NC_000084.6:-:43853801_43853885	1.47
novel_mir3044	21	miRNA	NC_000070.6:-:135959641_135959719	0.86
novel_mir3045	67	miRNA	NC_000075.6:-:96251210_96251257	2.73
novel_mir3059	12	miRNA	NC_000068.7:-:80355860_80355926	0.49
novel_mir3063	19	miRNA	NC_000085.6:+:44205265_44205330	0.77
novel_mir3065	603	miRNA	NC_000072.6:+:31005014_31005051	24.57
novel_mir648	34	miRNA	NC_000075.6:+:68781180_68781238	1.39
novel_mir3068	41	miRNA	NC_000080.6:-:22770747_22770813	1.67
novel_mir764	169	miRNA	NC_000076.6:+:65554526_65554604	6.89
novel_mir3071	17	miRNA	NC_000085.6:+:48424635_48424698	0.69
novel_mir3072	12	miRNA	NC_000077.6:+:22034868_22034908	0.49
novel_mir3078	31	miRNA	NC_000071.6:-:139119028_139119086	1.26
novel_mir3088	300	miRNA	NC_000078.6:+:55962344_55962396	12.22
novel_mir3101	35	miRNA	NC_000084.6:+:3544399_3544461	1.43
novel_mir3103	54	miRNA	NC_000071.6:+:120587346_120587401	2.2
novel_mir3105	22	miRNA	NC_000073.6:+:136938703_136938791	0.9
novel_mir3109	20	miRNA	NC_000077.6:-:113155799_113155886	0.81
novel_mir3115	82	miRNA	NC_000074.6:-:94673179_94673238	3.34
novel_mir3120	32	miRNA	NC_000074.6:-:24781664_24781717	1.3
novel_mir3123	36	miRNA	NC_000075.6:+:18755022_18755073	1.47
novel_mir3127	17	miRNA	NC_000074.6:+:32710122_32710197	0.69
novel_mir3129	149	miRNA	NC_000068.7:-:4451027_4451117	6.07
novel_mir3134	14	miRNA	NC_000068.7:+:113667654_113667714	0.57
novel_mir3137	39	miRNA	NC_000067.6:-:12341842_12341899	1.59
novel_mir3139	49	miRNA	NC_000074.6:+:45854756_45854800	2
novel_mir3141	42	miRNA	NC_000080.6:+:104072359_104072416	1.71
novel_mir764	26	miRNA	NC_000077.6:+:6202036_6202077	1.06
novel_mir3151	78	miRNA	NC_000070.6:+:85583202_85583288	3.18
novel_mir3154	26	miRNA	NC_000068.7:-:77897310_77897385	1.06
novel_mir3159	30	miRNA	NC_000067.6:+:152274063_152274127	1.22
novel_mir3162	24	miRNA	NC_000068.7:-:27038010_27038093	0.98
novel_mir3163	39	miRNA	NC_000084.6:+:42161895_42161938	1.59
novel_mir3164	40	miRNA	NC_000068.7:-:129181990_129182035	1.63
novel_mir3165	182	miRNA	NC_000084.6:+:31941687_31941750	7.42
novel_mir3172	33	miRNA	NC_000071.6:+:72801606_72801672	1.34
novel_mir3180	20	miRNA	NC_000068.7:+:163139730_163139804	0.81
novel_mir3183	20	miRNA	NC_000073.6:-:119292789_119292873	0.81
novel_mir3193	85	miRNA	NC_000083.6:+:78814163_78814214	3.46
novel_mir825	15	miRNA	NC_000084.6:-:75532024_75532076	0.61
novel_mir3202	19	miRNA	NC_000068.7:+:166130270_166130317	0.77
novel_mir1738	37	miRNA	NC_000067.6:-:168326705_168326771	1.51
novel_mir1475	25	miRNA	NC_000069.6:+:7803427_7803511	1.02
novel_mir3218	17	miRNA	NC_000075.6:+:72275244_72275308	0.69
novel_mir1916	83	miRNA	NC_000081.6:+:12431943_12432021	3.38
novel_mir3222	29	miRNA	NC_000070.6:-:93083863_93083925	1.18
novel_mir3229	389	miRNA	NC_000081.6:+:72074438_72074488	15.85
novel_mir3234	34	miRNA	NC_000072.6:-:53701953_53702031	1.39
novel_mir3242	40	miRNA	NC_000080.6:+:71457246_71457323	1.63
novel_mir3243	66	miRNA	NC_000072.6:-:85647999_85648073	2.69
novel_mir3245	25	miRNA	NC_000069.6:+:88039882_88039939	1.02
novel_mir3247	51	miRNA	NC_000071.6:+:22036750_22036797	2.08
novel_mir3250	382	miRNA	NC_000079.6:-:37447676_37447757	15.57
novel_mir3251	464	miRNA	NC_000069.6:+:32266594_32266682	18.91
novel_mir3253	74	miRNA	NC_000075.6:+:102731096_102731149	3.02
novel_mir3254	354	miRNA	NC_000082.6:+:76236471_76236538	14.43
novel_mir3259	38	miRNA	NC_000072.6:+:56831699_56831777	1.55
novel_mir3262	28	miRNA	NC_000079.6:-:21036961_21037036	1.14
novel_mir3263	15	miRNA	NC_000075.6:-:65074433_65074504	0.61
novel_mir3289	15	miRNA	NC_000070.6:-:62247987_62248029	0.61
novel_mir809	15	miRNA	NC_000075.6:+:100362815_100362880	0.61
novel_mir3303	38	miRNA	NC_000068.7:-:26239354_26239440	1.55
novel_mir3309	1655	miRNA	NC_000068.7:-:174330027_174330087	67.44
novel_mir3310	16	miRNA	NC_000084.6:-:58523406_58523496	0.65
novel_mir3291	1824	miRNA	NC_000076.6:+:108968899_108968938	74.33
novel_mir3311	36	miRNA	NC_000079.6:+:46094067_46094152	1.47
novel_mir3312	25	miRNA	NC_000082.6:+:30315695_30315766	1.02
novel_mir3315	4160	miRNA	NC_000081.6:-:93336478_93336541	169.52
novel_mir3316	27	miRNA	NC_000078.6:-:12333946_12334027	1.1
novel_mir3317	33	miRNA	NC_000073.6:-:111517999_111518087	1.34
novel_mir3318	30	miRNA	NC_000069.6:+:90647429_90647494	1.22
novel_mir3322	40	miRNA	NC_000068.7:+:90191547_90191620	1.63
novel_mir2753	234	miRNA	NC_000069.6:-:134621011_134621078	9.54
novel_mir3329	30	miRNA	NC_000075.6:-:119022430_119022493	1.22
novel_mir3332	20	miRNA	NT_187023.1:-:2900712_2900762	0.81
novel_mir3334	37	miRNA	NC_000082.6:-:79317529_79317601	1.51
novel_mir3337	28	miRNA	NC_000077.6:+:13793512_13793576	1.14
novel_mir3339	32	miRNA	NC_000080.6:+:45090048_45090097	1.3
novel_mir3340	28	miRNA	NC_000083.6:-:43599810_43599858	1.14
novel_mir1252	20	miRNA	NC_000086.7:+:57985234_57985292	0.81
novel_mir3348	1949	miRNA	NC_000074.6:+:121950789_121950849	79.42
novel_mir3351	131	miRNA	NC_000084.6:+:39427698_39427775	5.34
novel_mir3353	133	miRNA	NC_000076.6:+:7681488_7681561	5.42
novel_mir3360	393	miRNA	NC_000068.7:-:44926947_44927020	16.01
novel_mir3363	16	miRNA	NC_000083.6:+:70934769_70934852	0.65
novel_mir3375	13656	miRNA	NC_000067.6:+:167340412_167340468	556.48
novel_mir3375	35428	miRNA	NC_000082.6:-:11144080_11144136	1443.68
novel_mir3378	264	miRNA	NC_000078.6:-:104150257_104150325	10.76
novel_mir3379	32236	miRNA	NC_000067.6:-:167340422_167340480	1313.61
novel_mir3381	18	miRNA	NC_000076.6:+:34659919_34659988	0.73
novel_mir3382	13	miRNA	NC_000080.6:+:13464881_13464933	0.53
novel_mir3384	158	miRNA	NC_000077.6:+:74724446_74724488	6.44
novel_mir3385	24	miRNA	NC_000077.6:+:74818033_74818074	0.98
novel_mir3387	10	miRNA	NC_000078.6:-:5731005_5731056	0.41
novel_mir3388	27	miRNA	NC_000068.7:+:137273952_137274031	1.1
novel_mir3395	711	miRNA	NC_000084.6:+:77065515_77065578	28.97
novel_mir3396	14	miRNA	NC_000079.6:-:119617571_119617659	0.57
novel_mir3399	77	miRNA	NC_000067.6:-:29222397_29222443	3.14
novel_mir3401	41	miRNA	NC_000067.6:+:172903514_172903601	1.67
novel_mir3406	25	miRNA	NC_000069.6:+:88950612_88950688	1.02
novel_mir3409	27	miRNA	NC_000074.6:+:79965615_79965672	1.1
novel_mir3410	394	miRNA	NC_000075.6:+:106453836_106453898	16.06
novel_mir3411	18	miRNA	NC_000077.6:+:117005981_117006039	0.73
novel_mir3413	411	miRNA	NC_000085.6:-:24030955_24031023	16.75
novel_mir3416	50	miRNA	NC_000077.6:-:68883602_68883669	2.04
novel_mir3421	69	miRNA	NC_000068.7:-:144331650_144331728	2.81
novel_mir3427	24	miRNA	NC_000069.6:-:138880820_138880907	0.98
novel_mir3429	57	miRNA	NC_000081.6:-:93336829_93336913	2.32
novel_mir3430	15	miRNA	NC_000071.6:-:121191341_121191390	0.61
novel_mir3433	21	miRNA	NC_000068.7:-:154569789_154569852	0.86
novel_mir3434	25	miRNA	NC_000071.6:+:88968566_88968629	1.02
novel_mir3436	257	miRNA	NC_000078.6:+:4082598_4082673	10.47
novel_mir3438	3829	miRNA	NC_000081.6:+:68362725_68362784	156.03
novel_mir2361	63	miRNA	NC_000078.6:-:5572281_5572347	2.57
novel_mir3441	449	miRNA	NC_000069.6:+:62159410_62159483	18.3
novel_mir3443	33	miRNA	NC_000070.6:-:144326958_144327033	1.34
novel_mir3447	36	miRNA	NC_000081.6:-:84856140_84856193	1.47
novel_mir3449	18	miRNA	NC_000084.6:-:65885817_65885875	0.73
novel_mir3452	18	miRNA	NW_012132910.1:+:476630_476712	0.73
novel_mir3463	147	miRNA	NC_000072.6:+:140623584_140623639	5.99
novel_mir3465	37	miRNA	NC_000067.6:-:75150035_75150115	1.51
novel_mir3469	163	miRNA	NC_000073.6:-:45793744_45793818	6.64
novel_mir3470	64	miRNA	NC_000072.6:+:113002128_113002187	2.61
novel_mir3471	38	miRNA	NC_000076.6:-:128368840_128368902	1.55
novel_mir3474	10	miRNA	NC_000074.6:-:125294526_125294570	0.41
novel_mir3475	36	miRNA	NC_000067.6:-:3759638_3759680	1.47
novel_mir3476	2726	miRNA	NC_000070.6:-:151861265_151861308	111.08
novel_mir3477	103	miRNA	NC_000082.6:-:18288924_18288997	4.2
novel_mir1411	11	miRNA	NC_000074.6:-:107406539_107406621	0.45
novel_mir3478	20	miRNA	NC_000074.6:-:48235782_48235840	0.81
novel_mir3479	274	miRNA	NC_000083.6:+:39844930_39845006	11.17
novel_mir3480	2199	miRNA	NC_000077.6:-:23307176_23307229	89.61
novel_mir3468	1857	miRNA	NT_166299.2:+:175297_175347	75.67
novel_mir3485	186	miRNA	NC_000071.6:+:138755068_138755124	7.58
novel_mir3486	36	miRNA	NC_000077.6:+:103157679_103157746	1.47
novel_mir164	177	miRNA	NC_000079.6:+:24945930_24945991	7.21
novel_mir3491	31	miRNA	NC_000085.6:-:34547569_34547642	1.26
novel_mir3492	186	miRNA	NC_000083.6:+:12991963_12992024	7.58
novel_mir3494	2549	miRNA	NC_000075.6:+:62344412_62344463	103.87
novel_mir3496	496	miRNA	NC_000070.6:+:119195355_119195418	20.21
novel_mir3498	1773	miRNA	NC_000073.6:-:109865616_109865693	72.25
novel_mir3499	41	miRNA	NC_000069.6:-:85231043_85231086	1.67
novel_mir3500	92	miRNA	NC_000073.6:+:90129986_90130064	3.75
novel_mir3502	3436	miRNA	NC_000071.6:+:29569393_29569469	140.02
novel_mir3503	90	miRNA	NC_000072.6:+:145689623_145689692	3.67
novel_mir3505	287	miRNA	NC_000076.6:+:9675227_9675289	11.7
novel_mir3507	18	miRNA	NC_000085.6:-:18611965_18612015	0.73
novel_mir3508	30	miRNA	NC_000083.6:-:15577469_15577529	1.22
novel_mir3511	57	miRNA	NC_000067.6:+:43445848_43445891	2.32
novel_mir3515	41	miRNA	NW_016097318.1:-:291061_291116	1.67
novel_mir3516	264	miRNA	NC_000082.6:+:64852449_64852498	10.76
novel_mir3519	21	miRNA	NC_000071.6:-:26892598_26892679	0.86
novel_mir3523	1451	miRNA	NC_000072.6:-:99666837_99666902	59.13
novel_mir3524	29	miRNA	NC_000068.7:-:162661186_162661227	1.18
novel_mir3528	33	miRNA	NC_000068.7:+:69994369_69994447	1.34
novel_mir3529	3408	miRNA	NC_000073.6:+:142659401_142659477	138.88
novel_mir3530	35	miRNA	NC_000070.6:-:22023056_22023128	1.43
novel_mir3532	264	miRNA	NC_000068.7:-:24460903_24460976	10.76
novel_mir3535	16	miRNA	NC_000068.7:-:53113732_53113775	0.65
novel_mir3537	1449	miRNA	NC_000083.6:-:4994109_4994166	59.05
novel_mir3538	27	miRNA	NC_000082.6:+:96446133_96446171	1.1
novel_mir3540	734	miRNA	NC_000072.6:-:23839349_23839407	29.91
novel_mir3541	98	miRNA	NC_000073.6:+:127912601_127912650	3.99
novel_mir3542	12	miRNA	NC_000077.6:-:95425053_95425153	0.49
novel_mir3543	1522	miRNA	NC_000069.6:-:126597244_126597304	62.02
novel_mir3544	42	miRNA	NC_000067.6:-:180725825_180725879	1.71
novel_mir3545	152	miRNA	NC_000067.6:+:36068469_36068525	6.19
novel_mir3547	63	miRNA	NC_000072.6:-:87811658_87811700	2.57
novel_mir3551	114	miRNA	NC_000083.6:-:12318733_12318811	4.65
novel_mir3552	34	miRNA	NC_000068.7:-:49935688_49935766	1.39
novel_mir3553	2848	miRNA	NC_000079.6:-:45965204_45965262	116.06
novel_mir3554	177	miRNA	NC_000076.6:+:67127165_67127231	7.21
novel_mir3556	236	miRNA	NC_000078.6:+:80790932_80790998	9.62
novel_mir3557	2136	miRNA	NC_000068.7:-:165234414_165234461	87.04
novel_mir3562	286	miRNA	NC_000070.6:-:108833292_108833350	11.65
novel_mir2997	48	miRNA	NC_000073.6:-:19294856_19294906	1.96
novel_mir3565	890	miRNA	NC_000080.6:-:115042062_115042144	36.27
novel_mir3566	30	miRNA	NC_000084.6:-:9450119_9450193	1.22
novel_mir3567	182	miRNA	NC_000071.6:-:44226543_44226595	7.42
novel_mir3568	23	miRNA	NC_000075.6:+:124105818_124105901	0.94
novel_mir3574	33	miRNA	NC_000083.6:-:34120390_34120461	1.34
novel_mir3576	35	miRNA	NC_000075.6:-:123717493_123717568	1.43
novel_mir3579	3419	miRNA	NC_000073.6:+:4776939_4777004	139.32
novel_mir3580	17	miRNA	NC_000073.6:-:16614655_16614700	0.69
novel_mir3583	43	miRNA	NC_000069.6:-:95995672_95995733	1.75
novel_mir3584	33	miRNA	NC_000073.6:-:73391092_73391148	1.34
novel_mir3589	408	miRNA	NC_000075.6:+:108306522_108306605	16.63
novel_mir3590	720	miRNA	NC_000073.6:-:137321603_137321644	29.34
novel_mir3592	117	miRNA	NC_000069.6:+:33800199_33800269	4.77
novel_mir3597	13000	miRNA	NC_000069.6:-:95930051_95930113	529.75
novel_mir3601	171	miRNA	NC_000070.6:+:78211818_78211888	6.97
novel_mir3602	507	miRNA	NC_000074.6:-:86382294_86382335	20.66
novel_mir3605	52	miRNA	NC_000073.6:-:141436979_141437032	2.12
novel_mir3606	110	miRNA	NC_000083.6:+:39848324_39848401	4.48
novel_mir3607	33203	miRNA	NC_000070.6:+:46344223_46344289	1353.01
novel_mir3609	6514	miRNA	NC_000083.6:-:12992092_12992147	265.44
novel_mir3610	18	miRNA	NC_000068.7:-:18064429_18064488	0.73
novel_mir3611	29	miRNA	NC_000070.6:-:3184925_3185018	1.18
novel_mir3547	474	miRNA	NC_000072.6:-:87811600_87811678	19.32
novel_mir3612	44	miRNA	NC_000071.6:+:124540786_124540857	1.79
novel_mir3613	20	miRNA	NC_000067.6:+:192196377_192196459	0.81
novel_mir3621	53	miRNA	NC_000077.6:-:100473070_100473150	2.16
novel_mir3626	1554	miRNA	NC_000081.6:-:96698820_96698883	63.33
novel_mir3627	98	miRNA	NC_000076.6:+:111010325_111010377	3.99
novel_mir3628	43	miRNA	NC_000073.6:-:105764731_105764767	1.75
novel_mir3630	40551	miRNA	NC_000077.6:+:119055947_119056013	1652.44
novel_mir3633	46	miRNA	NC_000081.6:-:72593303_72593383	1.87
novel_mir3637	347	miRNA	NC_000071.6:+:5694067_5694107	14.14
novel_mir3640	1123	miRNA	NC_000078.6:-:71016520_71016577	45.76
novel_mir3641	5254	miRNA	NC_000073.6:-:16615216_16615306	214.1
novel_mir3642	26	miRNA	NC_000081.6:+:103366734_103366813	1.06
novel_mir3643	14	miRNA	NC_000077.6:-:100492768_100492849	0.57
novel_mir3646	16	miRNA	NC_000073.6:-:29071664_29071748	0.65
novel_mir3648	39	miRNA	NC_000071.6:+:5663988_5664037	1.59
novel_mir3649	14	miRNA	NW_016097318.1:+:37545_37607	0.57
novel_mir3651	81	miRNA	NC_000085.6:-:5840775_5840843	3.3
novel_mir3652	277	miRNA	NC_000083.6:-:35126332_35126404	11.29
novel_mir3654	50	miRNA	NC_000068.7:-:26378218_26378285	2.04
novel_mir3656	432	miRNA	NT_187026.1:-:759748_759816	17.6
novel_mir3659	115	miRNA	NC_000082.6:-:96127510_96127576	4.69
novel_mir3660	58	miRNA	NC_000069.6:+:20154977_20155018	2.36
novel_mir3664	172	miRNA	NC_000077.6:-:113683739_113683795	7.01
novel_mir3666	3346	miRNA	NC_000073.6:+:126081918_126081986	136.35
novel_mir3667	24	miRNA	NC_000069.6:-:95818697_95818748	0.98
novel_mir3348	68	miRNA	NC_000074.6:+:121950826_121950879	2.77
novel_mir3670	184	miRNA	NC_000078.6:+:101028870_101028938	7.5
novel_mir3671	33	miRNA	NT_187005.1:+:893298_893373	1.34
novel_mir3674	137	miRNA	NC_000084.6:-:67724102_67724174	5.58
novel_mir3675	25	miRNA	NC_000072.6:+:117917319_117917369	1.02
novel_mir3677	1802	miRNA	NC_000077.6:+:82781400_82781445	73.43
novel_mir3679	221	miRNA	NC_000067.6:-:64121924_64121976	9.01
novel_mir3680	18	miRNA	NC_000071.6:-:31200573_31200657	0.73
novel_mir3682	40	miRNA	NC_000072.6:-:140607808_140607884	1.63
novel_mir3683	43	miRNA	NC_000080.6:-:18238372_18238419	1.75
novel_mir3685	46	miRNA	NC_000071.6:-:113128225_113128282	1.87
novel_mir3688	118	miRNA	NC_000085.6:-:34527241_34527312	4.81
novel_mir3689	28	miRNA	NC_000074.6:+:106870774_106870838	1.14
novel_mir3690	38	miRNA	NC_000077.6:-:59739312_59739371	1.55
novel_mir3692	1509	miRNA	NC_000073.6:-:30823720_30823777	61.49
novel_mir3693	25	miRNA	NC_000086.7:-:101274202_101274276	1.02
novel_mir3696	15	miRNA	NC_000068.7:+:157561386_157561434	0.61
novel_mir3697	130	miRNA	NC_000085.6:+:43753066_43753107	5.3
novel_mir3698	29	miRNA	NC_000077.6:+:104670019_104670099	1.18
novel_mir3699	433	miRNA	NC_000073.6:+:127708698_127708754	17.64
novel_mir3700	31	miRNA	NC_000073.6:-:18958007_18958075	1.26
novel_mir3703	314	miRNA	NC_000076.6:-:54075678_54075729	12.8
novel_mir3704	1599	miRNA	NC_000071.6:-:52190476_52190522	65.16
novel_mir3705	30	miRNA	NT_187023.1:+:608546_608590	1.22
novel_mir3706	443	miRNA	NC_000077.6:+:23256749_23256800	18.05
novel_mir3707	241	miRNA	NC_000069.6:+:67463998_67464049	9.82
novel_mir3711	38	miRNA	NC_000074.6:+:27435187_27435267	1.55
novel_mir3524	1511	miRNA	NC_000068.7:-:162661135_162661205	61.57
novel_mir3714	16	miRNA	NC_000069.6:+:96016534_96016602	0.65
novel_mir3716	25	miRNA	NC_000071.6:+:115327244_115327287	1.02
novel_mir3717	209	miRNA	NC_000086.7:-:93832003_93832055	8.52
novel_mir3719	171	miRNA	NC_000069.6:+:157534351_157534396	6.97
novel_mir3598	1701	miRNA	NC_000072.6:-:30304196_30304246	69.32
novel_mir3721	29	miRNA	NC_000069.6:+:108199576_108199628	1.18
novel_mir3723	113	miRNA	NC_000067.6:+:134455568_134455621	4.6
novel_mir3724	40	miRNA	NC_000070.6:+:152273989_152274034	1.63
novel_mir3726	27	miRNA	NC_000078.6:-:8499773_8499841	1.1
novel_mir1130	27	miRNA	NC_000072.6:+:32821060_32821146	1.1
novel_mir3737	126	miRNA	NC_000073.6:-:105481805_105481885	5.13
novel_mir3738	134	miRNA	NC_000071.6:+:23434266_23434324	5.46
novel_mir3739	51	miRNA	NC_000076.6:+:40349377_40349437	2.08
novel_mir3740	52	miRNA	NC_000077.6:+:101009506_101009562	2.12
novel_mir3745	86	miRNA	NC_000072.6:+:117907207_117907275	3.5
novel_mir3746	42	miRNA	NC_000076.6:+:85102555_85102622	1.71
novel_mir3749	285	miRNA	NC_000070.6:+:120287330_120287392	11.61
novel_mir3751	165	miRNA	NC_000069.6:-:69696104_69696143	6.72
novel_mir3752	41	miRNA	NC_000080.6:-:50807606_50807672	1.67
novel_mir3754	39	miRNA	NC_000076.6:-:62578043_62578109	1.59
novel_mir3755	100	miRNA	NC_000074.6:+:119503528_119503581	4.07
novel_mir3763	12	miRNA	NC_000076.6:+:127677306_127677367	0.49
novel_mir3764	136	miRNA	NC_000070.6:-:123664712_123664780	5.54
novel_mir3766	27	miRNA	NC_000074.6:-:126736194_126736248	1.1
novel_mir3767	14	miRNA	NC_000075.6:-:98037475_98037550	0.57
novel_mir3770	559	miRNA	NC_000086.7:-:150366929_150367001	22.78
novel_mir3771	846	miRNA	NC_000068.7:-:35582012_35582096	34.47
novel_mir3774	14091	miRNA	NC_000082.6:+:91729459_91729536	574.21
novel_mir3779	1089	miRNA	NC_000086.7:+:13072747_13072799	44.38
novel_mir3783	17	miRNA	NC_000068.7:+:11172207_11172257	0.69
novel_mir3784	730	miRNA	NC_000076.6:+:80656481_80656552	29.75
novel_mir3786	32	miRNA	NT_187012.1:+:201113_201162	1.3
novel_mir3787	35	miRNA	NC_000068.7:-:131179963_131180037	1.43
novel_mir3789	32	miRNA	NC_000083.6:+:56009192_56009282	1.3
novel_mir3790	175	miRNA	NC_000073.6:-:127026155_127026206	7.13
novel_mir3795	40	miRNA	NC_000083.6:-:27113761_27113840	1.63
novel_mir3797	1878	miRNA	NC_000084.6:-:37969762_37969808	76.53
novel_mir3565	298	miRNA	NC_000080.6:-:115042126_115042204	12.14
novel_mir3798	17	miRNA	NC_000068.7:-:5154061_5154117	0.69
novel_mir3800	71	miRNA	NC_000073.6:-:141658801_141658856	2.89
novel_mir3803	306	miRNA	NC_000068.7:-:93642586_93642626	12.47
novel_mir3804	23	miRNA	NC_000076.6:+:81321240_81321297	0.94
novel_mir3805	29	miRNA	NC_000070.6:+:132510174_132510227	1.18
novel_mir3808	207	miRNA	NC_000085.6:-:46500804_46500870	8.44
novel_mir3809	61	miRNA	NT_187005.1:-:1491763_1491817	2.49
novel_mir3812	19	miRNA	NC_000071.6:-:118028768_118028826	0.77
novel_mir3813	32	miRNA	NC_000070.6:-:133608345_133608418	1.3
novel_mir3817	12	miRNA	NC_000071.6:+:129584636_129584706	0.49
novel_mir3821	175	miRNA	NC_000070.6:-:132212037_132212109	7.13
novel_mir3477	993	miRNA	NC_000082.6:-:18288903_18288947	40.46
novel_mir3828	169	miRNA	NC_000082.6:+:49855706_49855773	6.89
novel_mir3835	89	miRNA	NC_000083.6:-:84187859_84187908	3.63
novel_mir3837	124	miRNA	NC_000071.6:-:115731923_115731994	5.05
novel_mir3840	1205	miRNA	NC_000074.6:+:109737295_109737372	49.1
novel_mir3844	196	miRNA	NC_000071.6:-:98185890_98185969	7.99
novel_mir3845	1540	miRNA	NC_000073.6:+:16313992_16314068	62.75
novel_mir3847	556	miRNA	NC_000077.6:+:107547816_107547871	22.66
novel_mir3848	1348	miRNA	NC_000070.6:+:134768028_134768071	54.93
novel_mir3850	3200	miRNA	NC_000071.6:+:107289563_107289603	130.4
novel_mir3851	85	miRNA	NC_000083.6:-:31855526_31855612	3.46
novel_mir3852	29	miRNA	NC_000070.6:-:113304379_113304441	1.18
novel_mir3854	479	miRNA	NC_000071.6:-:35228973_35229045	19.52
novel_mir3468	38	miRNA	NC_000077.6:+:105181832_105181893	1.55
novel_mir3857	944	miRNA	NC_000084.6:-:40219303_40219359	38.47
novel_mir3858	60	miRNA	NC_000067.6:+:87791981_87792046	2.44
novel_mir3859	21	miRNA	NC_000077.6:-:100286984_100287066	0.86
novel_mir3861	34	miRNA	NC_000075.6:-:77512376_77512431	1.39
novel_mir3862	33	miRNA	NC_000085.6:-:47014746_47014803	1.34
novel_mir3863	79	miRNA	NC_000068.7:-:32259939_32260022	3.22
novel_mir3864	59	miRNA	NC_000083.6:-:10319534_10319608	2.4
novel_mir3521	32	miRNA	NC_000067.6:+:37551560_37551604	1.3
novel_mir3706	2205	miRNA	NC_000074.6:-:116733250_116733319	89.85
novel_mir3866	22	miRNA	NC_000067.6:+:125365892_125365973	0.9
novel_mir3869	354	miRNA	NC_000068.7:-:60962377_60962421	14.43
novel_mir3484	145	miRNA	NC_000077.6:-:102318904_102318989	5.91
novel_mir3871	508	miRNA	NC_000069.6:+:103102650_103102732	20.7
novel_mir3872	22	miRNA	NC_000071.6:-:144874698_144874776	0.9
novel_mir3873	928	miRNA	NC_000086.7:-:103165264_103165313	37.82
novel_mir3876	307	miRNA	NC_000068.7:-:157078365_157078415	12.51
novel_mir3880	678	miRNA	NC_000071.6:-:136757538_136757610	27.63
novel_mir3881	24	miRNA	NC_000074.6:-:70895764_70895821	0.98
novel_mir3882	10	miRNA	NC_000084.6:+:52529444_52529497	0.41
novel_mir3884	28	miRNA	NC_000073.6:-:48137690_48137751	1.14
novel_mir3885	267	miRNA	NC_000076.6:-:60819739_60819812	10.88
novel_mir3890	223	miRNA	NT_187003.1:+:1207327_1207384	9.09
novel_mir3893	38	miRNA	NC_000081.6:+:101141204_101141244	1.55
novel_mir3898	31	miRNA	NC_000074.6:-:121294802_121294877	1.26
novel_mir3902	50	miRNA	NC_000071.6:-:108268783_108268835	2.04
novel_mir3903	155	miRNA	NC_000076.6:+:80577088_80577157	6.32
novel_mir3906	359	miRNA	NT_039662.3:-:91964_92037	14.63
novel_mir3908	32	miRNA	NC_000078.6:-:112592495_112592559	1.3
novel_mir3910	36	miRNA	NC_000084.6:+:80207021_80207074	1.47
novel_mir3913	87	miRNA	NC_000070.6:+:138340646_138340727	3.55
novel_mir3914	672	miRNA	NC_000079.6:-:98926217_98926303	27.38
novel_mir3915	24	miRNA	NC_000067.6:+:93190967_93191030	0.98
novel_mir3917	43	miRNA	NC_000077.6:+:98777048_98777096	1.75
novel_mir3919	208	miRNA	NC_000081.6:+:80929240_80929294	8.48
novel_mir3925	54	miRNA	NC_000076.6:+:62286504_62286568	2.2
novel_mir3926	212	miRNA	NC_000075.6:-:21290857_21290920	8.64
novel_mir3927	328	miRNA	NC_000084.6:-:24020684_24020745	13.37
novel_mir3929	102	miRNA	NC_000076.6:+:80142328_80142383	4.16
novel_mir3931	32	miRNA	NC_000083.6:+:74529188_74529276	1.3
novel_mir3934	82	miRNA	NC_000085.6:-:5771337_5771394	3.34
novel_mir3935	35	miRNA	NC_000070.6:-:130123005_130123064	1.43
novel_mir3936	1012	miRNA	NC_000078.6:+:70825459_70825542	41.24
novel_mir3937	13	miRNA	NC_000077.6:+:82185955_82186012	0.53
novel_mir3938	37	miRNA	NC_000073.6:-:109703651_109703718	1.51
novel_mir3948	342	miRNA	NC_000078.6:-:3834108_3834176	13.94
novel_mir3949	19	miRNA	NC_000076.6:+:41663615_41663672	0.77
novel_mir3950	33	miRNA	NC_000076.6:-:37136143_37136203	1.34
novel_mir3951	33	miRNA	NC_000067.6:+:133134969_133135033	1.34
novel_mir3953	33	miRNA	NC_000069.6:-:36571898_36571966	1.34
novel_mir3954	46	miRNA	NC_000079.6:-:55211152_55211234	1.87
novel_mir3958	45	miRNA	NC_000076.6:-:87293523_87293582	1.83
novel_mir3959	20	miRNA	NC_000077.6:+:106501313_106501373	0.81
novel_mir3962	114	miRNA	NC_000067.6:-:167688640_167688711	4.65
novel_mir3963	51	miRNA	NC_000068.7:-:116064174_116064222	2.08
novel_mir3966	15	miRNA	NC_000068.7:-:19446212_19446280	0.61
novel_mir3970	12	miRNA	NC_000069.6:+:73904554_73904621	0.49
novel_mir3972	542	miRNA	NC_000073.6:+:28350928_28350971	22.09
novel_mir3976	10	miRNA	NC_000071.6:-:72763278_72763343	0.41
novel_mir3977	25	miRNA	NC_000071.6:-:120609473_120609555	1.02
novel_mir3979	273	miRNA	NC_000076.6:-:117845846_117845920	11.12
novel_mir3984	19	miRNA	NC_000077.6:-:12450088_12450148	0.77
novel_mir3985	22996	miRNA	NC_000067.6:+:52232367_52232451	937.08
novel_mir3989	87	miRNA	NC_000075.6:+:39439181_39439257	3.55
novel_mir3994	38	miRNA	NC_000072.6:+:31549856_31549911	1.55
novel_mir3996	29	miRNA	NC_000068.7:-:172977990_172978042	1.18
novel_mir3998	15	miRNA	NC_000078.6:+:69197218_69197273	0.61
novel_mir4006	23	miRNA	NC_000078.6:-:80115616_80115676	0.94
novel_mir4008	69	miRNA	NC_000075.6:+:65630597_65630652	2.81
novel_mir4009	835	miRNA	NC_000072.6:-:30304358_30304410	34.03
novel_mir4011	84	miRNA	NC_000070.6:+:53440508_53440581	3.42
novel_mir4016	24	miRNA	NC_000082.6:-:17423627_17423692	0.98
novel_mir4019	113	miRNA	NC_000083.6:+:24850586_24850649	4.6
novel_mir4026	20	miRNA	NC_000081.6:-:101144543_101144594	0.81
novel_mir4027	29	miRNA	NC_000077.6:-:103132536_103132589	1.18
novel_mir4028	70	miRNA	NC_000074.6:+:83997866_83997925	2.85
novel_mir4032	47	miRNA	NC_000072.6:+:134830131_134830200	1.92
novel_mir4033	3681	miRNA	NC_000082.6:+:31898542_31898633	150
novel_mir4034	450	miRNA	NC_000071.6:-:34549871_34549925	18.34
novel_mir4035	12	miRNA	NW_004450260.1:-:95673_95737	0.49
novel_mir4037	102	miRNA	NC_000083.6:-:46383354_46383417	4.16
novel_mir4039	18	miRNA	NC_000067.6:+:132983769_132983828	0.73
novel_mir4040	12	miRNA	NC_000077.6:-:115177814_115177864	0.49
novel_mir4044	162	miRNA	NC_000073.6:+:143460100_143460172	6.6
novel_mir4048	21	miRNA	NC_000080.6:-:78492009_78492089	0.86
novel_mir4054	227	miRNA	NC_000074.6:+:3588149_3588217	9.25
novel_mir4055	990	miRNA	NC_000086.7:-:58038710_58038795	40.34
novel_mir4056	47	miRNA	NC_000083.6:-:26508086_26508141	1.92
novel_mir4058	35	miRNA	NC_000070.6:-:101652358_101652416	1.43
novel_mir4060	220	miRNA	NC_000080.6:+:61682606_61682678	8.96
novel_mir4062	122	miRNA	NC_000070.6:-:45399948_45400037	4.97
novel_mir4064	40	miRNA	NC_000077.6:+:115883315_115883381	1.63
novel_mir4067	772	miRNA	NC_000070.6:-:82505528_82505568	31.46
novel_mir4068	26	miRNA	NC_000076.6:-:52027930_52028010	1.06
novel_mir4073	30	miRNA	NC_000085.6:+:5493574_5493659	1.22
novel_mir4076	26	miRNA	NC_000067.6:-:51761746_51761796	1.06
novel_mir4009	35	miRNA	NC_000073.6:+:39588608_39588676	1.43
novel_mir4085	50	miRNA	NC_000083.6:+:14732415_14732450	2.04
novel_mir4087	39	miRNA	NC_000078.6:-:55836684_55836743	1.59
novel_mir4092	44	miRNA	NC_000082.6:-:49575359_49575405	1.79
novel_mir4093	1157	miRNA	NC_000068.7:-:174438901_174438967	47.15
novel_mir4095	60	miRNA	NC_000074.6:-:47829755_47829837	2.44
novel_mir4097	10	miRNA	NC_000082.6:-:21024729_21024780	0.41
novel_mir3999	70	miRNA	NT_187023.1:-:1142194_1142277	2.85
novel_mir4099	66	miRNA	NC_000076.6:+:117224169_117224256	2.69
novel_mir4101	47	miRNA	NC_000081.6:+:39301195_39301265	1.92
novel_mir4105	1480	miRNA	NC_000077.6:+:5521014_5521077	60.31
novel_mir4106	60	miRNA	NC_000076.6:+:127597265_127597322	2.44
novel_mir4107	48	miRNA	NC_000074.6:-:33025799_33025881	1.96
novel_mir4108	56	miRNA	NC_000075.6:+:77754512_77754575	2.28
novel_mir4111	27	miRNA	NC_000075.6:-:114731456_114731534	1.1
novel_mir4112	22	miRNA	NC_000084.6:+:45559010_45559069	0.9
novel_mir4113	34	miRNA	NC_000079.6:+:58127372_58127425	1.39
novel_mir4114	28	miRNA	NC_000077.6:-:100880368_100880460	1.14
novel_mir4115	95	miRNA	NC_000073.6:-:45376845_45376917	3.87
novel_mir4116	67	miRNA	NC_000080.6:-:99299152_99299221	2.73
novel_mir4011	22	miRNA	NC_000070.6:+:53440445_53440528	0.9
novel_mir4050	96	miRNA	NC_000074.6:+:25979175_25979238	3.91
novel_mir4124	115	miRNA	NC_000083.6:-:28341060_28341128	4.69
novel_mir4125	249	miRNA	NC_000083.6:+:28375972_28376036	10.15
novel_mir4126	97	miRNA	NC_000069.6:-:81036755_81036845	3.95
novel_mir4135	59	miRNA	NC_000072.6:-:55117766_55117835	2.4
novel_mir4136	40	miRNA	NC_000081.6:+:25622556_25622638	1.63
novel_mir4138	14	miRNA	NC_000069.6:-:116423895_116423948	0.57
novel_mir4139	1430	miRNA	NC_000069.6:-:153664048_153664140	58.27
novel_mir4140	451	miRNA	NC_000069.6:+:102685418_102685488	18.38
novel_mir4143	147	miRNA	NC_000071.6:+:35039099_35039179	5.99
novel_mir4149	988	miRNA	NC_000079.6:-:63240013_63240056	40.26
novel_mir4150	135	miRNA	NC_000070.6:+:128550290_128550353	5.5
novel_mir4152	80	miRNA	NC_000067.6:-:191183926_191184016	3.26
novel_mir3544	173	miRNA	NC_000067.6:-:180725796_180725848	7.05
novel_mir4161	23	miRNA	NC_000073.6:+:79593223_79593290	0.94
novel_mir4163	29	miRNA	NC_000073.6:-:141088527_141088579	1.18
novel_mir4164	1323	miRNA	NC_000077.6:+:78261796_78261884	53.91
novel_mir4165	106	miRNA	NC_000086.7:-:37571582_37571637	4.32
novel_mir4168	35	miRNA	NC_000070.6:-:3228698_3228773	1.43
novel_mir4173	12	miRNA	NC_000086.7:+:76645222_76645284	0.49
novel_mir4177	75	miRNA	NC_000068.7:+:79255273_79255337	3.06
novel_mir4180	60	miRNA	NC_000071.6:+:92988905_92988985	2.44
novel_mir4181	13	miRNA	NC_000068.7:-:45039414_45039477	0.53
novel_mir4186	1160	miRNA	NC_000073.6:-:141276639_141276692	47.27
novel_mir4189	32	miRNA	NC_000081.6:+:89125579_89125637	1.3
novel_mir4190	147	miRNA	NT_187005.1:-:1460326_1460363	5.99
novel_mir4191	56	miRNA	NC_000077.6:+:98809858_98809903	2.28
novel_mir4193	2862	miRNA	NC_000085.6:+:46056665_46056719	116.63
novel_mir4196	36	miRNA	NC_000070.6:-:44568218_44568265	1.47
novel_mir43	122	miRNA	NC_000071.6:-:99978498_99978575	4.97
novel_mir4199	34	miRNA	NC_000070.6:-:101002986_101003050	1.39
novel_mir4200	11	miRNA	NC_000074.6:+:45006779_45006819	0.45
novel_mir4202	47	miRNA	NT_187005.1:+:1602532_1602589	1.92
novel_mir4203	41	miRNA	NC_000071.6:+:149353566_149353616	1.67
novel_mir4204	37	miRNA	NC_000075.6:-:121653749_121653805	1.51
novel_mir4209	29	miRNA	NC_000074.6:-:70779581_70779621	1.18
novel_mir4214	17	miRNA	NC_000068.7:+:85004398_85004463	0.69
novel_mir4216	29	miRNA	NC_000071.6:+:32146242_32146286	1.18
novel_mir4218	32	miRNA	NC_000068.7:-:102400842_102400895	1.3
novel_mir4219	47	miRNA	NC_000072.6:-:131388255_131388298	1.92
novel_mir4220	22	miRNA	NC_000083.6:-:25854868_25854937	0.9
novel_mir4222	72	miRNA	NC_000067.6:+:183439171_183439238	2.93
novel_mir4223	29	miRNA	NC_000073.6:-:44304860_44304917	1.18
novel_mir4228	21	miRNA	NC_000076.6:+:60555072_60555126	0.86
novel_mir4229	28	miRNA	NC_000081.6:+:28161124_28161188	1.14
novel_mir4231	17	miRNA	NC_000068.7:+:60770805_60770881	0.69
novel_mir4236	19	miRNA	NC_000085.6:-:47143598_47143683	0.77
novel_mir4237	49	miRNA	NC_000074.6:+:122699071_122699117	2
novel_mir4238	206	miRNA	NC_000084.6:-:35873558_35873644	8.39
novel_mir4241	18	miRNA	NC_000074.6:+:70461598_70461645	0.73
novel_mir4242	32	miRNA	NC_000078.6:+:111790077_111790155	1.3
novel_mir4245	34	miRNA	NC_000080.6:-:69242747_69242789	1.39
novel_mir3557	29	miRNA	NC_000068.7:-:165234440_165234495	1.18
novel_mir4254	33	miRNA	NC_000074.6:-:125941898_125941948	1.34
novel_mir4262	274	miRNA	NC_000075.6:-:43138404_43138467	11.17
novel_mir4265	927	miRNA	NC_000075.6:-:123113143_123113191	37.78
novel_mir4269	4277	miRNA	NC_000075.6:+:58284342_58284412	174.29
novel_mir4271	26	miRNA	NC_000078.6:-:111538558_111538610	1.06
novel_mir4272	149	miRNA	NC_000077.6:+:116843061_116843117	6.07
novel_mir4273	34	miRNA	NC_000076.6:+:41998037_41998117	1.39
novel_mir4279	60	miRNA	NC_000078.6:+:107711396_107711481	2.44
novel_mir4284	90	miRNA	NC_000074.6:+:117155791_117155860	3.67
novel_mir4287	25	miRNA	NC_000084.6:+:61310879_61310935	1.02
novel_mir4290	97	miRNA	NC_000071.6:+:149619415_149619497	3.95
novel_mir4292	30	miRNA	NC_000068.7:+:28750042_28750095	1.22
novel_mir4296	148	miRNA	NC_000077.6:+:23306054_23306112	6.03
novel_mir4297	42	miRNA	NC_000077.6:+:97799620_97799660	1.71
novel_mir4303	26	miRNA	NC_000081.6:+:75998075_75998126	1.06
novel_mir3429	81	miRNA	NC_000081.6:-:93336783_93336847	3.3
novel_mir4312	34	miRNA	NC_000084.6:-:80617460_80617519	1.39
novel_mir4313	579	miRNA	NC_000067.6:-:87756321_87756390	23.59
novel_mir4317	20	miRNA	NC_000078.6:+:29891784_29891837	0.81
novel_mir4319	18	miRNA	NC_000081.6:-:80173274_80173319	0.73
novel_mir4320	34	miRNA	NC_000085.6:-:50030635_50030695	1.39
novel_mir4321	30	miRNA	NC_000078.6:+:3781601_3781672	1.22
novel_mir4322	37	miRNA	NC_000072.6:-:120263358_120263415	1.51
novel_mir3607	6973	miRNA	NC_000070.6:+:46344271_46344312	284.15
novel_mir4325	21	miRNA	NC_000070.6:-:126411832_126411893	0.86
novel_mir4327	30	miRNA	NC_000072.6:-:88013824_88013909	1.22
novel_mir4331	66	miRNA	NC_000071.6:+:67121004_67121052	2.69
novel_mir4333	58	miRNA	NC_000073.6:-:144470548_144470607	2.36
novel_mir4335	33	miRNA	NC_000082.6:+:29579531_29579609	1.34
novel_mir4344	45	miRNA	NC_000085.6:+:44757218_44757270	1.83
novel_mir4345	31	miRNA	NC_000081.6:+:86070249_86070292	1.26
novel_mir4348	52	miRNA	NC_000074.6:-:126590582_126590635	2.12
novel_mir4350	44	miRNA	NC_000083.6:-:27193902_27193966	1.79
novel_mir4355	16	miRNA	NC_000078.6:-:54203257_54203332	0.65
novel_mir4356	34	miRNA	NC_000084.6:-:4844148_4844238	1.39
novel_mir4358	700	miRNA	NC_000083.6:+:49271059_49271138	28.52
novel_mir4361	32	miRNA	NC_000076.6:-:60787740_60787806	1.3
novel_mir4365	84	miRNA	NC_000073.6:-:24496086_24496157	3.42
novel_mir4371	29	miRNA	NC_000082.6:+:96552232_96552321	1.18
novel_mir4375	38	miRNA	NC_000068.7:-:69206089_69206142	1.55
novel_mir4377	42	miRNA	NC_000071.6:+:8368135_8368218	1.71
novel_mir4378	603	miRNA	NC_000077.6:+:117077242_117077326	24.57
novel_mir4382	20	miRNA	NC_000070.6:-:65297386_65297428	0.81
novel_mir4386	26	miRNA	NC_000070.6:+:151463307_151463365	1.06
novel_mir4389	897	miRNA	NC_000068.7:+:163204383_163204451	36.55
novel_mir4390	36	miRNA	NC_000079.6:+:28531766_28531845	1.47
novel_mir4392	53	miRNA	NC_000077.6:-:116581151_116581209	2.16
novel_mir4393	106	miRNA	NC_000079.6:-:19411998_19412060	4.32
novel_mir4396	23	miRNA	NC_000083.6:-:64957959_64958000	0.94
novel_mir4399	18	miRNA	NC_000070.6:-:114451256_114451328	0.73
novel_mir4400	27	miRNA	NC_000068.7:-:168117373_168117413	1.1
novel_mir4407	41	miRNA	NC_000077.6:-:98683040_98683118	1.67
novel_mir4408	33	miRNA	NC_000086.7:+:60892741_60892802	1.34
novel_mir4409	49	miRNA	NC_000084.6:+:69425789_69425834	2
novel_mir4417	23	miRNA	NC_000073.6:-:127273985_127274032	0.94
novel_mir4424	66	miRNA	NC_000067.6:+:36564644_36564718	2.69
novel_mir4429	37	miRNA	NC_000073.6:-:45277513_45277584	1.51
novel_mir4431	58	miRNA	NC_000071.6:+:123037325_123037382	2.36
novel_mir4436	44	miRNA	NC_000075.6:-:15357656_15357705	1.79
novel_mir4441	42	miRNA	NC_000068.7:-:165630118_165630197	1.71
novel_mir4442	21	miRNA	NC_000082.6:-:14981068_14981139	0.86
novel_mir4446	55	miRNA	NC_000073.6:+:16708456_16708505	2.24
novel_mir4451	83	miRNA	NC_000079.6:+:94576521_94576563	3.38
novel_mir4453	37	miRNA	NC_000073.6:+:44467954_44468007	1.51
novel_mir4463	1305	miRNA	NC_000068.7:+:178608670_178608754	53.18
novel_mir4466	26	miRNA	NC_000080.6:+:8105565_8105624	1.06
novel_mir4468	36	miRNA	NC_000067.6:-:36055236_36055323	1.47
novel_mir4475	79	miRNA	NC_000073.6:+:127490879_127490962	3.22
[truncated: 418 more rows]

## Sheet: Model group
sRNA id	Count(17339935)	Type	Description	TPM
mmu-miR-194-5p	44	mature	mir-194	2.54
mmu-miR-152-3p	3	mature	mir-148	0.17
mmu-miR-501-3p	14	mature	mir-500	0.81
mmu-miR-181b-5p	69	mature	mir-181	3.98
mmu-miR-1843a-5p	65	mature	mir-1843	3.75
mmu-miR-8112	369	mature	undef	21.28
mmu-miR-378a-3p	5879	mature	mir-378	339.04
mmu-miR-98-3p	1	mature	let-7	0.06
mmu-miR-1298-5p	8	mature	mir-1298	0.46
mmu-miR-34c-5p	15	mature	mir-34	0.87
mmu-miR-130a-3p	175	mature	mir-130	10.09
mmu-miR-494-3p	1	mature	mir-154	0.06
mmu-miR-142a-3p	19	mature	mir-142	1.1
mmu-miR-17-5p	84	mature	mir-17	4.84
mmu-miR-140-3p	337	mature	mir-140	19.43
mmu-miR-28a-3p	41	mature	mir-28	2.36
mmu-miR-485-5p	26	mature	mir-485	1.5
mmu-miR-701-5p	56	mature	undef	3.23
mmu-miR-215-5p	549	mature	mir-192	31.66
mmu-miR-26b-5p	1224	mature	mir-26	70.59
mmu-miR-375-3p	11632	mature	mir-375	670.82
mmu-miR-34b-5p	9	mature	mir-34	0.52
mmu-miR-7075-3p	16	mature	undef	0.92
mmu-miR-361-5p	77	mature	mir-361	4.44
mmu-miR-379-5p	252	mature	mir-379	14.53
mmu-miR-99b-5p	1929	mature	mir-10	111.25
mmu-miR-9b-3p	86	mature	undef	4.96
mmu-miR-186-5p	159	mature	mir-186	9.17
mmu-miR-199a-3p,mmu-miR-199b-3p	214	mature	mir-199	12.34
mmu-miR-23b-5p	1	mature	mir-23	0.06
mmu-miR-342-5p	4	mature	mir-342	0.23
mmu-let-7f-5p	11708	mature	let-7	675.2
mmu-miR-3097-3p	2	mature	undef	0.12
mmu-miR-322-5p	312	mature	mir-322	17.99
mmu-miR-25-5p	1	mature	mir-25	0.06
mmu-miR-103-3p	10	mature	mir-103	0.58
mmu-miR-5126	26	mature	undef	1.5
mmu-miR-6961-5p	104	mature	undef	6
mmu-miR-376b-5p	1	mature	mir-368	0.06
mmu-miR-210-3p	84	mature	mir-210	4.84
mmu-miR-300-5p	1	mature	mir-154	0.06
mmu-miR-291a-3p	1	mature	mir-290	0.06
mmu-miR-350-3p	54	mature	mir-350	3.11
mmu-miR-32-5p	12	mature	mir-32	0.69
mmu-miR-328-3p	6355	mature	mir-328	366.5
mmu-miR-1943-3p	1	mature	undef	0.06
mmu-miR-467c-5p	15	mature	mir-467	0.87
mmu-miR-200c-3p	327	mature	mir-8	18.86
mmu-miR-652-3p	9279	mature	mir-652	535.12
mmu-miR-126a-3p	7322	mature	mir-126	422.26
mmu-miR-31-3p	6	mature	mir-31	0.35
mmu-miR-92a-1-5p	1	mature	mir-25	0.06
mmu-miR-154-3p	2	mature	mir-154	0.12
mmu-miR-542-5p	119	mature	mir-542	6.86
mmu-miR-429-3p	1981	mature	mir-8	114.24
mmu-miR-10b-5p	371	mature	mir-10	21.4
mmu-miR-12186-5p	215	mature	undef	12.4
mmu-miR-214-3p	15	mature	mir-214	0.87
mmu-miR-26b-3p	1	mature	mir-26	0.06
mmu-miR-487b-3p	53	mature	mir-154	3.06
mmu-let-7a-5p	12269	mature	let-7	707.56
mmu-miR-484	7259	mature	mir-484	418.63
mmu-miR-224-5p	2	mature	mir-224	0.12
mmu-miR-5116	94	mature	undef	5.42
mmu-miR-322-3p	27	mature	mir-322	1.56
mmu-miR-872-5p	2720	mature	mir-872	156.86
mmu-miR-184-3p	108	mature	mir-184	6.23
mmu-miR-500-3p	719	mature	mir-500	41.46
mmu-miR-221-3p	42	mature	mir-221	2.42
mmu-miR-20a-5p	113	mature	mir-17	6.52
mmu-let-7e-5p	61	mature	let-7	3.52
mmu-miR-8116	182	mature	undef	10.5
mmu-miR-17-3p	3	mature	mir-17	0.17
mmu-miR-3077-3p	51	mature	undef	2.94
mmu-miR-193b-5p	1	mature	mir-193	0.06
mmu-miR-425-3p	1295	mature	mir-425	74.68
mmu-miR-1839-5p	786	mature	mir-1839	45.33
mmu-miR-153-3p	6	mature	mir-153	0.35
mmu-miR-709	5	mature	undef	0.29
mmu-miR-326-3p	984	mature	mir-326	56.75
mmu-miR-449a-5p	146	mature	mir-449	8.42
mmu-miR-1843a-3p	2	mature	mir-1843	0.12
mmu-miR-378b	288	mature	mir-378	16.61
mmu-miR-139-3p	67	mature	mir-139	3.86
mmu-miR-204-5p	1321	mature	mir-204	76.18
mmu-miR-433-3p	1	mature	mir-433	0.06
mmu-miR-215-3p	139	mature	mir-192	8.02
mmu-miR-34a-5p	1497	mature	mir-34	86.33
mmu-miR-450b-3p	29	mature	mir-450	1.67
mmu-miR-1a-3p	1976	mature	mir-1	113.96
mmu-miR-669a-3p,mmu-miR-669o-3p	58	mature	mir-467	3.34
mmu-miR-211-5p	7	mature	mir-204	0.4
mmu-miR-503-3p	570	mature	mir-503	32.87
mmu-miR-93-5p	1471	mature	mir-17	84.83
mmu-miR-1964-5p	1	mature	undef	0.06
mmu-miR-190b-5p	30	mature	mir-190	1.73
mmu-miR-324-3p	8	mature	mir-324	0.46
mmu-miR-486b-3p	3428	mature	mir-486	197.69
mmu-miR-574-3p	219	mature	mir-574	12.63
mmu-miR-431-5p	2	mature	mir-431	0.12
mmu-miR-151-5p	635	mature	mir-28	36.62
mmu-miR-339-3p	5	mature	mir-339	0.29
mmu-miR-151-3p	10239	mature	mir-28	590.49
mmu-miR-3079-5p	19	mature	undef	1.1
mmu-miR-133a-3p	232	mature	mir-133	13.38
mmu-miR-10a-5p	1718	mature	mir-10	99.08
mmu-let-7b-5p	10449	mature	let-7	602.6
mmu-miR-183-5p	155	mature	mir-183	8.94
mmu-miR-6956-3p	43	mature	undef	2.48
mmu-miR-499-5p	439	mature	mir-499	25.32
mmu-miR-30e-3p	17	mature	mir-30	0.98
mmu-miR-486a-5p,mmu-miR-486b-5p	34232	mature	mir-486	1974.17
mmu-miR-301a-3p	42	mature	mir-130	2.42
mmu-miR-486a-3p	479	mature	mir-486	27.62
mmu-miR-339-5p	61	mature	mir-339	3.52
mmu-miR-382-5p	150	mature	mir-154	8.65
mmu-miR-1264-5p	3	mature	mir-95	0.17
mmu-miR-200c-5p	2	mature	mir-8	0.12
mmu-miR-297a-5p	65	mature	mir-297	3.75
mmu-miR-369-3p	2	mature	mir-154	0.12
mmu-miR-192-5p	2548	mature	mir-192	146.94
mmu-miR-335-5p	1	mature	mir-335	0.06
mmu-miR-208a-3p	4	mature	mir-208	0.23
mmu-miR-495-3p	1	mature	mir-329	0.06
mmu-miR-425-5p	146	mature	mir-425	8.42
mmu-miR-130b-3p	34	mature	mir-130	1.96
mmu-miR-127-3p	3039	mature	mir-127	175.26
mmu-miR-195a-5p	24	mature	mir-15	1.38
mmu-miR-378c	3	mature	undef	0.17
mmu-miR-338-3p	2	mature	mir-338	0.12
mmu-miR-25-3p	10617	mature	mir-25	612.29
mmu-miR-22-5p	1	mature	mir-22	0.06
mmu-let-7d-3p	2395	mature	let-7	138.12
mmu-miR-30b-5p	548	mature	mir-30	31.6
mmu-miR-28a-5p	92	mature	mir-28	5.31
mmu-miR-141-3p	317	mature	mir-8	18.28
mmu-miR-802-3p	12	mature	mir-802	0.69
mmu-miR-700-5p	76	mature	undef	4.38
mmu-miR-664-3p	1	mature	mir-664	0.06
mmu-miR-19b-3p	423	mature	mir-19	24.39
mmu-miR-676-3p	684	mature	mir-676	39.45
mmu-miR-21a-5p	20585	mature	mir-21	1187.14
mmu-let-7d-5p	2627	mature	let-7	151.5
mmu-miR-340-3p	1	mature	mir-340	0.06
mmu-miR-23b-3p	338	mature	mir-23	19.49
mmu-miR-330-3p	1	mature	mir-330	0.06
mmu-miR-29c-3p	56	mature	mir-29	3.23
mmu-miR-98-5p	503	mature	let-7	29.01
mmu-miR-132-5p	32	mature	mir-132	1.85
mmu-miR-24-2-5p	323	mature	mir-24	18.63
mmu-let-7g-5p	35785	mature	let-7	2063.73
mmu-miR-411-5p	484	mature	mir-379	27.91
mmu-miR-101a-5p	1	mature	mir-101	0.06
mmu-miR-222-3p	122	mature	mir-221	7.04
mmu-miR-7a-1-3p	246	mature	mir-7	14.19
mmu-miR-15b-3p	22	mature	mir-15	1.27
mmu-miR-124-3p	35	mature	mir-124	2.02
mmu-miR-296-5p	337	mature	mir-296	19.43
mmu-miR-874-3p	12	mature	mir-874	0.69
mmu-miR-1983	430	mature	undef	24.8
mmu-miR-92a-3p	13383	mature	mir-25	771.8
mmu-miR-181a-5p	1563	mature	mir-181	90.14
mmu-miR-106b-5p	193	mature	mir-17	11.13
mmu-miR-221-5p	3	mature	mir-221	0.17
mmu-miR-669b-5p	1	mature	mir-467	0.06
mmu-miR-101a-3p	8	mature	mir-101	0.46
mmu-miR-193a-3p	5	mature	mir-193	0.29
mmu-miR-378d	2	mature	undef	0.12
mmu-miR-466i-5p	118	mature	mir-467	6.81
mmu-miR-92b-3p	1125	mature	mir-25	64.88
mmu-miR-493-5p	4	mature	mir-493	0.23
mmu-miR-146a-5p	11158	mature	mir-146	643.49
mmu-miR-365-2-5p	2	mature	mir-365	0.12
mmu-miR-20b-5p	64	mature	mir-17	3.69
mmu-miR-410-3p	61	mature	mir-154	3.52
mmu-miR-540-3p	9	mature	mir-540	0.52
mmu-let-7i-5p	25081	mature	let-7	1446.43
mmu-miR-30a-5p	874	mature	mir-30	50.4
mmu-miR-5129-3p	1	mature	undef	0.06
mmu-miR-27a-3p	9027	mature	mir-27	520.59
mmu-miR-503-5p	48	mature	mir-503	2.77
mmu-miR-21a-3p	1	mature	mir-21	0.06
mmu-miR-30c-2-3p	3	mature	mir-30	0.17
mmu-miR-3965	3	mature	undef	0.17
mmu-miR-181c-5p	249	mature	mir-181	14.36
mmu-miR-467d-5p	2	mature	mir-467	0.12
mmu-miR-299a-3p	1	mature	mir-299	0.06
mmu-miR-22-3p	18303	mature	mir-22	1055.54
mmu-miR-3068-5p	4	mature	mir-3068	0.23
mmu-miR-6538	292	mature	undef	16.84
mmu-miR-323-3p	1	mature	mir-154	0.06
mmu-miR-24-3p	222021	mature	mir-24	12804
mmu-miR-223-5p	207	mature	mir-223	11.94
mmu-miR-451a	100143	mature	mir-451	5775.28
mmu-miR-708-5p	2	mature	mir-708	0.12
mmu-miR-193a-5p	1	mature	mir-193	0.06
mmu-miR-9-5p	7	mature	mir-9	0.4
mmu-miR-328-5p	1	mature	mir-328	0.06
mmu-miR-450b-5p	2	mature	mir-450	0.12
mmu-miR-206-3p	4885	mature	mir-1	281.72
mmu-miR-122-5p	8709	mature	mir-122	502.25
mmu-miR-27a-5p	2	mature	mir-27	0.12
mmu-miR-196a-5p	69	mature	mir-196	3.98
mmu-miR-302a-3p	1	mature	mir-302	0.06
mmu-miR-369-5p	1	mature	mir-154	0.06
mmu-miR-188-5p	1	mature	mir-188	0.06
mmu-miR-134-5p	1	mature	mir-134	0.06
mmu-miR-182-5p	15	mature	mir-182	0.87
mmu-miR-1198-5p	88237	mature	undef	5088.66
mmu-miR-340-5p	130	mature	mir-340	7.5
mmu-miR-19a-3p	33	mature	mir-19	1.9
mmu-miR-434-5p	2	mature	mir-434	0.12
mmu-miR-146b-5p	9	mature	mir-146	0.52
mmu-miR-30a-3p	73	mature	mir-30	4.21
mmu-miR-496a-3p	1	mature	mir-154	0.06
mmu-miR-199a-5p	65	mature	mir-199	3.75
mmu-miR-96-5p	20	mature	mir-96	1.15
mmu-miR-154-5p	444	mature	mir-154	25.61
mmu-miR-125b-1-3p	4	mature	mir-10	0.23
mmu-miR-7a-5p	707	mature	mir-7	40.77
mmu-miR-497a-5p	95	mature	mir-497	5.48
mmu-miR-337-3p	1	mature	mir-337	0.06
mmu-miR-203-3p	85	mature	mir-203	4.9
mmu-miR-335-3p	1	mature	mir-335	0.06
mmu-miR-300-3p	1	mature	mir-154	0.06
mmu-miR-99a-5p	10073	mature	mir-10	580.91
mmu-miR-744-5p	16	mature	mir-744	0.92
mmu-miR-365-3p	44	mature	mir-365	2.54
mmu-miR-341-3p	128	mature	mir-341	7.38
mmu-miR-6978-3p	1	mature	undef	0.06
mmu-miR-1981-5p	1	mature	undef	0.06
mmu-miR-23a-3p	10482	mature	mir-23	604.5
mmu-miR-6948-3p	30	mature	undef	1.73
mmu-miR-100-5p	1374	mature	mir-10	79.24
mmu-miR-155-5p	8	mature	mir-155	0.46
mmu-miR-466h-3p	1	mature	mir-467	0.06
mmu-miR-200b-5p	8	mature	mir-8	0.46
mmu-miR-144-5p	1	mature	mir-144	0.06
mmu-miR-1306-3p	103	mature	mir-1306	5.94
mmu-miR-450a-5p	12	mature	mir-450	0.69
mmu-let-7k	2	mature	undef	0.12
mmu-miR-574-5p	6	mature	mir-574	0.35
mmu-miR-145a-5p	303	mature	mir-145	17.47
mmu-miR-145a-3p	29	mature	mir-145	1.67
mmu-miR-27b-3p	3119	mature	mir-27	179.87
mmu-miR-434-3p	22	mature	mir-434	1.27
mmu-miR-342-3p	128	mature	mir-342	7.38
mmu-miR-7682-3p	29	mature	undef	1.67
mmu-miR-15a-5p	587	mature	mir-15	33.85
mmu-miR-30c-1-3p	1	mature	mir-30	0.06
mmu-miR-149-5p	228	mature	mir-149	13.15
mmu-miR-467a-5p	16	mature	mir-467	0.92
mmu-miR-128-3p	1918	mature	mir-128	110.61
mmu-miR-582-5p	1	mature	mir-582	0.06
mmu-miR-29a-3p	418	mature	mir-29	24.11
mmu-miR-144-3p	650	mature	mir-144	37.49
mmu-miR-455-5p	3	mature	mir-455	0.17
mmu-miR-143-5p	1	mature	mir-143	0.06
mmu-miR-137-3p	1	mature	mir-137	0.06
mmu-miR-3084-5p	25	mature	mir-3084	1.44
mmu-miR-3102-5p.2-5p	2	mature	mir-3102	0.12
mmu-miR-135b-5p	1	mature	mir-135	0.06
mmu-miR-31-5p	52	mature	mir-31	3
mmu-miR-376a-3p	3	mature	mir-368	0.17
mmu-miR-345-5p	1	mature	mir-345	0.06
mmu-miR-872-3p	876	mature	mir-872	50.52
mmu-miR-214-5p	2	mature	mir-214	0.12
mmu-miR-140-5p	379	mature	mir-140	21.86
mmu-miR-3074-2-3p	174	mature	mir-3074	10.03
mmu-miR-148a-3p	358	mature	mir-148	20.65
mmu-let-7f-2-3p	37	mature	let-7	2.13
mmu-miR-344-3p	2	mature	mir-344	0.12
mmu-miR-200b-3p	91	mature	mir-8	5.25
mmu-miR-3535	1	mature	mir-3535	0.06
mmu-miR-1191a	1	mature	undef	0.06
mmu-miR-423-5p	800	mature	mir-423	46.14
mmu-miR-30d-5p	8805	mature	mir-30	507.79
mmu-miR-6971-3p	24	mature	undef	1.38
mmu-miR-320-3p	704	mature	mir-320	40.6
mmu-miR-223-3p	1446	mature	mir-223	83.39
mmu-miR-34b-3p	24	mature	mir-34	1.38
mmu-miR-672-5p	1	mature	mir-672	0.06
mmu-let-7a-1-3p,mmu-let-7c-2-3p	27	mature	let-7	1.56
mmu-miR-196b-5p	6456	mature	mir-196	372.32
mmu-miR-187-3p	115	mature	mir-187	6.63
mmu-miR-30e-5p	78	mature	mir-30	4.5
mmu-miR-187-5p	1	mature	mir-187	0.06
mmu-miR-200a-3p	132	mature	mir-8	7.61
mmu-miR-879-5p	32	mature	mir-879	1.85
mmu-let-7e-3p	1	mature	let-7	0.06
mmu-miR-125a-5p	34	mature	mir-10	1.96
mmu-miR-130b-5p	2	mature	mir-130	0.12
mmu-miR-92b-5p	1	mature	mir-25	0.06
mmu-miR-181d-5p	465	mature	mir-181	26.82
mmu-miR-6980-3p	41	mature	undef	2.36
mmu-miR-148b-3p	91	mature	mir-148	5.25
mmu-miR-3572-3p	6	mature	mir-3572	0.35
mmu-miR-6418-3p	2	mature	undef	0.12
mmu-miR-362-5p	1	mature	mir-362	0.06
mmu-miR-138-5p	56	mature	mir-138	3.23
mmu-miR-351-5p	5	mature	mir-351	0.29
mmu-miR-205-5p	14	mature	mir-205	0.81
mmu-miR-30c-5p	113	mature	mir-30	6.52
mmu-miR-381-3p	5	mature	mir-154	0.29
mmu-miR-136-5p	1	mature	mir-136	0.06
mmu-miR-3087-3p	29	mature	undef	1.67
mmu-miR-193b-3p	594	mature	mir-193	34.26
mmu-miR-181a-1-3p	6	mature	mir-181	0.35
mmu-miR-33-5p	61	mature	mir-33	3.52
mmu-miR-199b-5p	4	mature	mir-199	0.23
mmu-miR-674-5p	4	mature	mir-674	0.23
mmu-miR-139-5p	3190	mature	mir-139	183.97
mmu-miR-142b	17	mature	mir-142	0.98
mmu-miR-490-5p	5	mature	mir-490	0.29
mmu-miR-219a-2-3p	54	mature	mir-219	3.11
mmu-miR-125b-5p	597	mature	mir-10	34.43
mmu-miR-150-5p	7006	mature	mir-150	404.04
mmu-miR-671-5p	2	mature	mir-671	0.12
mmu-let-7i-3p	28	mature	let-7	1.61
mmu-miR-99b-3p	3	mature	mir-10	0.17
mmu-miR-34c-3p	78	mature	mir-34	4.5
mmu-miR-409-3p	2	mature	mir-154	0.12
mmu-miR-877-5p	157	mature	mir-877	9.05
mmu-miR-200a-5p	8	mature	mir-8	0.46
mmu-miR-374b-5p	88	mature	mir-374	5.07
mmu-miR-378a-5p	7	mature	mir-378	0.4
mmu-miR-669o-5p	3	mature	mir-467	0.17
mmu-miR-26a-5p	5180	mature	mir-26	298.73
mmu-miR-99a-3p	2	mature	mir-10	0.12
mmu-miR-16-5p	26685	mature	mir-15	1538.93
mmu-miR-218-5p	172	mature	mir-218	9.92
mmu-miR-203b-5p	3	mature	undef	0.17
mmu-miR-324-5p	2	mature	mir-324	0.12
mmu-miR-126a-5p	297	mature	mir-126	17.13
mmu-miR-350-5p	1	mature	mir-350	0.06
mmu-miR-6954-3p	1	mature	undef	0.06
mmu-miR-143-3p	6266	mature	mir-143	361.36
mmu-let-7c-5p	27891	mature	let-7	1608.48
mmu-miR-208b-3p	1	mature	mir-208	0.06
mmu-miR-7b-5p	1	mature	mir-7	0.06
mmu-miR-101b-3p	228	mature	mir-101	13.15
mmu-miR-185-5p	701	mature	mir-185	40.43
mmu-miR-190a-5p	2	mature	mir-190	0.12
mmu-miR-15b-5p	252	mature	mir-15	14.53
mmu-miR-615-3p	1	mature	mir-615	0.06
mmu-miR-370-3p	1	mature	mir-370	0.06
mmu-miR-191-5p	25403	mature	mir-191	1465
mmu-miR-142a-5p	343	mature	mir-142	19.78
mmu-miR-423-3p	921	mature	mir-423	53.11
mmu-miR-29b-3p	14	mature	mir-29	0.81
novel_mir1	128368	miRNA	NC_000076.6:-:91181413_91181483	7403.03
novel_mir2	4637	miRNA	NC_000071.6:+:123330830_123330893	267.42
novel_mir3	1063	miRNA	NC_000068.7:-:170257941_170258043	61.3
novel_mir4	1080	miRNA	NC_000067.6:+:35999106_35999150	62.28
novel_mir5	76	miRNA	NC_000072.6:+:26101634_26101685	4.38
novel_mir6	3603	miRNA	NC_000086.7:-:153726355_153726415	207.79
novel_mir7	25	miRNA	NC_000071.6:-:60672514_60672591	1.44
novel_mir9	189	miRNA	NC_000070.6:-:132763685_132763752	10.9
novel_mir11	45	miRNA	NC_000068.7:-:162133623_162133675	2.6
novel_mir16	176	miRNA	NC_000067.6:-:188833430_188833485	10.15
novel_mir20	17	miRNA	NC_000068.7:-:112168767_112168826	0.98
novel_mir22	136	miRNA	NT_187009.1:-:923079_923134	7.84
novel_mir23	101	miRNA	NC_000080.6:+:16204958_16205047	5.82
novel_mir25	59	miRNA	NC_000067.6:-:58256258_58256303	3.4
novel_mir26	197	miRNA	NC_000084.6:-:11989788_11989827	11.36
novel_mir27	18	miRNA	NC_000071.6:+:130432237_130432300	1.04
novel_mir30	18	miRNA	NC_000077.6:+:26418196_26418275	1.04
novel_mir35	38	miRNA	NC_000076.6:-:54261755_54261805	2.19
novel_mir36	13	miRNA	NC_000075.6:+:49374384_49374438	0.75
novel_mir37	10	miRNA	NC_000084.6:-:41731992_41732037	0.58
novel_mir38	16	miRNA	NC_000076.6:+:62922968_62923019	0.92
novel_mir43	254	miRNA	NC_000071.6:-:99978470_99978516	14.65
novel_mir44	3282	miRNA	NC_000074.6:+:108374449_108374506	189.27
novel_mir45	216	miRNA	NC_000086.7:-:59616743_59616795	12.46
novel_mir51	141	miRNA	NC_000067.6:+:192310835_192310892	8.13
novel_mir54	102	miRNA	NC_000077.6:-:45980271_45980363	5.88
novel_mir55	11	miRNA	NC_000086.7:+:164078878_164078919	0.63
novel_mir56	29	miRNA	NC_000084.6:+:75463787_75463877	1.67
novel_mir58	20	miRNA	NC_000073.6:-:24553172_24553216	1.15
novel_mir60	539	miRNA	NC_000074.6:-:123155711_123155747	31.08
novel_mir62	12	miRNA	NC_000069.6:-:145758824_145758869	0.69
novel_mir75	10	miRNA	NC_000073.6:+:38156637_38156724	0.58
novel_mir78	147	miRNA	NC_000076.6:-:80549436_80549484	8.48
novel_mir81	133	miRNA	NC_000079.6:+:43481285_43481337	7.67
novel_mir82	187	miRNA	NC_000068.7:+:181459529_181459621	10.78
novel_mir82	41	miRNA	NC_000068.7:+:181459598_181459664	2.36
novel_mir83	165	miRNA	NC_000068.7:-:92183556_92183644	9.52
novel_mir84	157	miRNA	NC_000069.6:+:145758654_145758708	9.05
novel_mir85	30	miRNA	NC_000076.6:+:81559311_81559391	1.73
novel_mir87	1405	miRNA	NC_000081.6:-:102203956_102204024	81.03
novel_mir88	567	miRNA	NC_000068.7:+:163054762_163054825	32.7
novel_mir80	224	miRNA	NC_000083.6:-:5841110_5841167	12.92
novel_mir91	45	miRNA	NC_000073.6:+:81859270_81859350	2.6
novel_mir93	91	miRNA	NC_000077.6:-:3290148_3290225	5.25
novel_mir94	117	miRNA	NC_000069.6:+:95659166_95659229	6.75
novel_mir96	45	miRNA	NC_000086.7:-:20291537_20291606	2.6
novel_mir98	329	miRNA	NC_000083.6:-:46031750_46031799	18.97
novel_mir99	44	miRNA	NC_000081.6:-:98296233_98296276	2.54
novel_mir101	18	miRNA	NC_000084.6:+:41062181_41062221	1.04
novel_mir103	87	miRNA	NC_000081.6:+:48889735_48889810	5.02
novel_mir105	1166	miRNA	NC_000081.6:-:75748234_75748287	67.24
novel_mir106	42	miRNA	NT_187005.1:-:1312610_1312696	2.42
novel_mir107	12	miRNA	NC_000069.6:+:41565789_41565835	0.69
novel_mir108	1633	miRNA	NC_000068.7:+:162660772_162660816	94.18
novel_mir109	26	miRNA	NC_000073.6:-:19664892_19664954	1.5
novel_mir110	145	miRNA	NC_000086.7:+:8074616_8074665	8.36
novel_mir112	10	miRNA	NC_000070.6:+:63261654_63261739	0.58
novel_mir114	26	miRNA	NC_000075.6:-:31281186_31281265	1.5
novel_mir115	10	miRNA	NC_000075.6:+:70679136_70679203	0.58
novel_mir119	502	miRNA	NC_000071.6:-:137531454_137531494	28.95
novel_mir122	47	miRNA	NC_000078.6:+:40446585_40446665	2.71
novel_mir123	16	miRNA	NC_000073.6:-:140857173_140857226	0.92
novel_mir124	68	miRNA	NC_000083.6:-:36032419_36032461	3.92
novel_mir127	247	miRNA	NC_000075.6:-:20642110_20642160	14.24
novel_mir130	17	miRNA	NC_000073.6:-:127232910_127232978	0.98
novel_mir133	221	miRNA	NC_000073.6:-:127614726_127614789	12.75
novel_mir135	13	miRNA	NC_000069.6:+:89090487_89090577	0.75
novel_mir140	2593	miRNA	NC_000068.7:+:164071224_164071286	149.54
novel_mir141	24	miRNA	NC_000073.6:+:99535194_99535252	1.38
novel_mir142	71	miRNA	NC_000085.6:-:46044727_46044800	4.09
novel_mir143	18	miRNA	NC_000068.7:-:156018597_156018666	1.04
novel_mir149	20	miRNA	NC_000068.7:-:31572546_31572628	1.15
novel_mir152	10	miRNA	NC_000071.6:+:111559417_111559476	0.58
novel_mir161	454	miRNA	NC_000077.6:+:119086355_119086420	26.18
novel_mir162	12	miRNA	NC_000077.6:-:97338612_97338698	0.69
novel_mir165	74	miRNA	NC_000070.6:+:141383537_141383591	4.27
novel_mir167	72	miRNA	NC_000075.6:-:102494422_102494483	4.15
novel_mir169	120	miRNA	NC_000068.7:-:165728943_165729012	6.92
novel_mir171	127	miRNA	NC_000081.6:-:99239742_99239814	7.32
novel_mir173	58	miRNA	NC_000079.6:+:98925879_98925954	3.34
novel_mir174	1452	miRNA	NC_000071.6:-:99728614_99728695	83.74
novel_mir177	23	miRNA	NC_000070.6:-:141299757_141299826	1.33
novel_mir178	101	miRNA	NC_000086.7:+:129750677_129750743	5.82
novel_mir179	25	miRNA	NC_000078.6:-:55398665_55398719	1.44
novel_mir180	39	miRNA	NC_000068.7:-:113216923_113217001	2.25
novel_mir181	12	miRNA	NC_000070.6:-:141893114_141893172	0.69
novel_mir182	29	miRNA	NC_000078.6:-:103202973_103203054	1.67
novel_mir183	32	miRNA	NC_000078.6:-:100199358_100199409	1.85
novel_mir186	14	miRNA	NC_000086.7:-:7922264_7922331	0.81
novel_mir187	23163	miRNA	NC_000073.6:-:139894848_139894921	1335.82
novel_mir193	317	miRNA	NC_000086.7:-:73659266_73659307	18.28
novel_mir194	34	miRNA	NC_000073.6:+:131084762_131084837	1.96
novel_mir197	12	miRNA	NC_000068.7:-:156576326_156576401	0.69
novel_mir201	59	miRNA	NC_000074.6:-:123834471_123834536	3.4
novel_mir202	34	miRNA	NC_000072.6:+:132439457_132439516	1.96
novel_mir206	10	miRNA	NC_000067.6:+:178942745_178942799	0.58
novel_mir124	47	miRNA	NT_187009.1:-:17589_17654	2.71
novel_mir212	34	miRNA	NC_000070.6:-:102088016_102088098	1.96
novel_mir215	19	miRNA	NC_000080.6:-:55887309_55887386	1.1
novel_mir226	20	miRNA	NC_000071.6:+:130222295_130222372	1.15
novel_mir227	2158	miRNA	NC_000079.6:-:42052748_42052821	124.45
novel_mir228	35	miRNA	NC_000068.7:+:167217386_167217470	2.02
novel_mir230	50	miRNA	NC_000081.6:-:75672830_75672905	2.88
novel_mir232	1565	miRNA	NC_000071.6:+:34187172_34187219	90.25
novel_mir234	10	miRNA	NC_000083.6:-:33551318_33551398	0.58
novel_mir237	34	miRNA	NC_000076.6:-:26374343_26374407	1.96
novel_mir240	10	miRNA	NC_000071.6:+:134148239_134148325	0.58
novel_mir243	48	miRNA	NC_000076.6:+:61002725_61002790	2.77
novel_mir245	86	miRNA	NC_000077.6:+:106167001_106167077	4.96
novel_mir247	43	miRNA	NC_000073.6:+:79793512_79793584	2.48
novel_mir252	53	miRNA	NC_000068.7:-:172049154_172049202	3.06
novel_mir254	13	miRNA	NC_000070.6:+:152552823_152552914	0.75
novel_mir255	32	miRNA	NC_000067.6:+:191906818_191906885	1.85
novel_mir260	19	miRNA	NC_000073.6:-:75762483_75762575	1.1
novel_mir262	20	miRNA	NC_000075.6:+:52677697_52677771	1.15
novel_mir263	21	miRNA	NC_000071.6:+:120322259_120322317	1.21
novel_mir266	211	miRNA	NC_000071.6:-:114779670_114779754	12.17
novel_mir267	66	miRNA	NC_000071.6:-:33259686_33259738	3.81
novel_mir271	471	miRNA	NC_000070.6:+:134468406_134468448	27.16
novel_mir272	32	miRNA	NC_000072.6:-:37687054_37687104	1.85
novel_mir274	13	miRNA	NT_187064.1:+:48742_48817	0.75
novel_mir279	57	miRNA	NC_000082.6:-:30886410_30886485	3.29
novel_mir280	194	miRNA	NC_000068.7:-:30033123_30033182	11.19
novel_mir97	16	miRNA	NC_000071.6:-:93206163_93206227	0.92
novel_mir282	483	miRNA	NC_000076.6:+:80857300_80857381	27.85
novel_mir285	35	miRNA	NC_000070.6:+:114339859_114339917	2.02
novel_mir288	129	miRNA	NC_000081.6:-:65503600_65503650	7.44
novel_mir292	34	miRNA	NC_000078.6:+:102524484_102524565	1.96
novel_mir295	47	miRNA	NC_000071.6:+:135245800_135245863	2.71
novel_mir296	43	miRNA	NC_000073.6:+:52535830_52535898	2.48
novel_mir299	746	miRNA	NC_000071.6:+:88648018_88648074	43.02
novel_mir312	12	miRNA	NC_000075.6:+:58067584_58067630	0.69
novel_mir313	32	miRNA	NC_000070.6:-:62502116_62502175	1.85
novel_mir318	32	miRNA	NC_000072.6:-:88241368_88241448	1.85
novel_mir319	22	miRNA	NC_000073.6:+:24450551_24450604	1.27
novel_mir322	13	miRNA	NC_000081.6:-:99699844_99699936	0.75
novel_mir323	64	miRNA	NC_000067.6:+:143610248_143610320	3.69
novel_mir324	11	miRNA	NC_000072.6:+:29441442_29441491	0.63
novel_mir325	33	miRNA	NC_000083.6:+:83222927_83222983	1.9
novel_mir327	58	miRNA	NC_000070.6:-:126288482_126288523	3.34
novel_mir329	153	miRNA	NT_039634.4:-:394662_394717	8.82
novel_mir330	49	miRNA	NC_000077.6:+:84958350_84958435	2.83
novel_mir332	48	miRNA	NC_000070.6:+:12342384_12342432	2.77
novel_mir333	11	miRNA	NC_000083.6:+:28028204_28028272	0.63
novel_mir334	85	miRNA	NC_000077.6:-:118825855_118825908	4.9
novel_mir340	11	miRNA	NC_000068.7:-:74661221_74661296	0.63
novel_mir347	78	miRNA	NC_000083.6:-:45349886_45349936	4.5
novel_mir348	18	miRNA	NC_000083.6:-:45970747_45970837	1.04
novel_mir351	12	miRNA	NC_000083.6:-:31845144_31845206	0.69
novel_mir353	14	miRNA	NC_000067.6:-:37614773_37614855	0.81
novel_mir354	202	miRNA	NC_000079.6:-:103643152_103643197	11.65
novel_mir355	31	miRNA	NC_000076.6:+:127984611_127984689	1.79
novel_mir357	37	miRNA	NC_000074.6:+:94418880_94418962	2.13
novel_mir358	608	miRNA	NC_000081.6:-:78876371_78876424	35.06
novel_mir363	695	miRNA	NC_000072.6:+:17307623_17307665	40.08
novel_mir368	15	miRNA	NC_000081.6:-:79506064_79506125	0.87
novel_mir370	102	miRNA	NC_000072.6:+:84058837_84058902	5.88
novel_mir378	152	miRNA	NC_000068.7:-:160408857_160408922	8.77
novel_mir380	13	miRNA	NC_000071.6:-:145114722_145114793	0.75
novel_mir383	11	miRNA	NC_000081.6:-:7568080_7568159	0.63
novel_mir384	21	miRNA	NC_000072.6:+:114072188_114072237	1.21
novel_mir385	36	miRNA	NT_039662.3:+:1411517_1411585	2.08
novel_mir387	18	miRNA	NC_000071.6:-:125141636_125141730	1.04
novel_mir388	35	miRNA	NC_000077.6:-:21989852_21989925	2.02
novel_mir395	61	miRNA	NC_000070.6:-:140479923_140480004	3.52
novel_mir397	11	miRNA	NC_000073.6:+:82260792_82260839	0.63
novel_mir400	14	miRNA	NC_000071.6:-:104068995_104069059	0.81
novel_mir403	13	miRNA	NC_000068.7:+:31279089_31279169	0.75
novel_mir406	17	miRNA	NC_000079.6:+:41605511_41605583	0.98
novel_mir407	19	miRNA	NT_187007.1:-:88413_88477	1.1
novel_mir410	47	miRNA	NC_000081.6:-:97953917_97954005	2.71
novel_mir412	12	miRNA	NC_000079.6:+:105100899_105100960	0.69
novel_mir415	62	miRNA	NC_000071.6:+:121835513_121835575	3.58
novel_mir419	11	miRNA	NC_000076.6:+:18020587_18020660	0.63
novel_mir420	10	miRNA	NC_000078.6:+:106928485_106928536	0.58
novel_mir422	13	miRNA	NC_000069.6:+:122786226_122786303	0.75
novel_mir431	49	miRNA	NC_000069.6:+:98230560_98230610	2.83
novel_mir432	615	miRNA	NC_000077.6:-:3410316_3410393	35.47
novel_mir433	19	miRNA	NC_000076.6:-:117966368_117966448	1.1
novel_mir440	14	miRNA	NC_000074.6:-:120038644_120038688	0.81
novel_mir442	637	miRNA	NC_000076.6:+:59323353_59323403	36.74
novel_mir453	23	miRNA	NC_000080.6:+:54271761_54271847	1.33
novel_mir454	52	miRNA	NC_000077.6:-:97981476_97981557	3
novel_mir455	29	miRNA	NC_000074.6:-:60759029_60759084	1.67
novel_mir458	26	miRNA	NC_000068.7:+:59646071_59646135	1.5
novel_mir459	24	miRNA	NC_000070.6:-:139871903_139871977	1.38
novel_mir461	17	miRNA	NC_000075.6:+:58489348_58489423	0.98
novel_mir463	14	miRNA	NC_000081.6:+:79028412_79028480	0.81
novel_mir465	28	miRNA	NC_000079.6:+:55400791_55400856	1.61
novel_mir467	27	miRNA	NC_000075.6:-:120602887_120602952	1.56
novel_mir468	255	miRNA	NC_000084.6:+:75380583_75380647	14.71
novel_mir469	13	miRNA	NC_000073.6:-:19040590_19040675	0.75
novel_mir470	341	miRNA	NC_000075.6:-:121521670_121521743	19.67
novel_mir475	13	miRNA	NC_000076.6:-:120031503_120031575	0.75
novel_mir484	31	miRNA	NC_000076.6:+:60478732_60478790	1.79
novel_mir486	47	miRNA	NC_000068.7:+:173040479_173040528	2.71
novel_mir490	55	miRNA	NC_000068.7:-:157334553_157334592	3.17
novel_mir500	18	miRNA	NC_000086.7:-:142972772_142972824	1.04
novel_mir515	13	miRNA	NC_000077.6:-:121015197_121015279	0.75
novel_mir516	97	miRNA	NC_000077.6:-:43506720_43506800	5.59
novel_mir526	217	miRNA	NC_000070.6:+:11388018_11388056	12.51
novel_mir532	96	miRNA	NC_000069.6:+:96154780_96154853	5.54
novel_mir543	21	miRNA	NC_000080.6:-:57329447_57329508	1.21
novel_mir544	37	miRNA	NC_000077.6:-:119502694_119502743	2.13
novel_mir546	21	miRNA	NC_000081.6:-:72648262_72648314	1.21
novel_mir550	66	miRNA	NC_000079.6:+:6552517_6552591	3.81
novel_mir553	32	miRNA	NC_000070.6:+:152349430_152349468	1.85
novel_mir554	24	miRNA	NC_000074.6:+:108264682_108264741	1.38
novel_mir555	15	miRNA	NC_000070.6:-:124016090_124016164	0.87
novel_mir557	39	miRNA	NC_000079.6:-:70731754_70731799	2.25
novel_mir558	1026	miRNA	NC_000073.6:+:139299557_139299603	59.17
novel_mir561	29	miRNA	NC_000078.6:+:18399339_18399403	1.67
novel_mir572	11	miRNA	NC_000067.6:+:187664448_187664514	0.63
novel_mir577	81	miRNA	NC_000075.6:-:90193855_90193927	4.67
novel_mir581	24	miRNA	NC_000070.6:-:135925402_135925458	1.38
novel_mir583	42	miRNA	NC_000069.6:+:95987559_95987619	2.42
novel_mir587	69	miRNA	NC_000074.6:+:23039294_23039360	3.98
novel_mir227	43	miRNA	NC_000085.6:-:12476813_12476870	2.48
novel_mir588	12	miRNA	NC_000076.6:+:86452742_86452816	0.69
novel_mir596	1062	miRNA	NC_000067.6:+:12440152_12440203	61.25
novel_mir598	35	miRNA	NC_000070.6:+:13750689_13750760	2.02
novel_mir609	48	miRNA	NC_000078.6:-:4162390_4162467	2.77
novel_mir612	29	miRNA	NC_000085.6:-:15336269_15336329	1.67
novel_mir616	71	miRNA	NC_000079.6:-:101848732_101848784	4.09
novel_mir618	402	miRNA	NC_000069.6:-:156578540_156578613	23.18
novel_mir619	31	miRNA	NC_000070.6:+:116221621_116221695	1.79
novel_mir625	34	miRNA	NC_000078.6:-:113516727_113516778	1.96
novel_mir633	57	miRNA	NC_000075.6:-:123555301_123555350	3.29
novel_mir634	10	miRNA	NC_000067.6:-:92641269_92641347	0.58
novel_mir637	83	miRNA	NC_000082.6:+:91506141_91506208	4.79
novel_mir638	66	miRNA	NC_000073.6:-:44606683_44606742	3.81
novel_mir639	48	miRNA	NC_000073.6:-:92669817_92669890	2.77
novel_mir644	16	miRNA	NC_000070.6:-:107374154_107374196	0.92
novel_mir646	285	miRNA	NC_000070.6:-:107382085_107382155	16.44
novel_mir648	26	miRNA	NC_000075.6:+:68781148_68781198	1.5
novel_mir650	39	miRNA	NC_000078.6:-:29974873_29974919	2.25
novel_mir659	19	miRNA	NC_000081.6:+:79141553_79141603	1.1
novel_mir660	25	miRNA	NC_000074.6:+:110957818_110957900	1.44
novel_mir662	12	miRNA	NC_000070.6:+:148602605_148602695	0.69
novel_mir664	393	miRNA	NC_000067.6:-:180977981_180978027	22.66
novel_mir669	100	miRNA	NC_000072.6:-:85867987_85868066	5.77
novel_mir672	13	miRNA	NC_000071.6:-:148517299_148517355	0.75
novel_mir673	23	miRNA	NC_000068.7:+:130299724_130299777	1.33
novel_mir674	17	miRNA	NT_187007.1:+:327450_327490	0.98
novel_mir681	10	miRNA	NT_166293.1:+:77090_77161	0.58
novel_mir689	406	miRNA	NC_000084.6:+:75235086_75235125	23.41
novel_mir691	50	miRNA	NC_000070.6:-:84797942_84798042	2.88
novel_mir693	111	miRNA	NC_000072.6:-:85186426_85186503	6.4
novel_mir695	19	miRNA	NC_000068.7:+:118597288_118597345	1.1
novel_mir697	11	miRNA	NC_000082.6:+:10570555_10570605	0.63
novel_mir700	362	miRNA	NC_000069.6:-:137950427_137950486	20.88
novel_mir701	34	miRNA	NC_000077.6:-:118709862_118709916	1.96
novel_mir704	18	miRNA	NW_004450262.2:+:165710_165792	1.04
novel_mir706	11	miRNA	NC_000074.6:+:108689313_108689377	0.63
novel_mir717	27	miRNA	NC_000067.6:-:130715817_130715885	1.56
novel_mir720	300	miRNA	NC_000079.6:+:13390482_13390524	17.3
novel_mir722	39	miRNA	NC_000081.6:-:101708860_101708937	2.25
novel_mir727	47	miRNA	NC_000072.6:-:107644025_107644101	2.71
novel_mir734	168	miRNA	NC_000074.6:-:85548620_85548676	9.69
novel_mir735	21	miRNA	NC_000085.6:-:25647960_25648038	1.21
novel_mir737	214	miRNA	NC_000077.6:-:118964475_118964530	12.34
novel_mir742	30	miRNA	NC_000073.6:+:48402749_48402792	1.73
novel_mir750	21	miRNA	NC_000068.7:-:34914584_34914634	1.21
novel_mir751	19	miRNA	NT_166305.2:+:3409375_3409447	1.1
novel_mir752	194	miRNA	NT_187027.1:+:3202050_3202097	11.19
novel_mir754	13	miRNA	NC_000073.6:+:138455565_138455634	0.75
novel_mir758	43	miRNA	NC_000073.6:-:46105120_46105170	2.48
novel_mir761	27	miRNA	NC_000077.6:-:97832136_97832192	1.56
novel_mir764	10874	miRNA	NC_000070.6:-:132266162_132266216	627.11
novel_mir767	34	miRNA	NC_000080.6:-:32029946_32029991	1.96
novel_mir768	191	miRNA	NC_000074.6:+:126265787_126265850	11.02
novel_mir773	26	miRNA	NC_000076.6:-:81345711_81345787	1.5
novel_mir774	334	miRNA	NT_187015.1:+:11889_11939	19.26
novel_mir781	14	miRNA	NC_000085.6:+:10224635_10224729	0.81
novel_mir787	15	miRNA	NC_000070.6:-:82934432_82934499	0.87
novel_mir794	35	miRNA	NC_000068.7:-:36217655_36217707	2.02
novel_mir800	42	miRNA	NC_000083.6:-:44013193_44013231	2.42
novel_mir802	773	miRNA	NC_000071.6:+:56803986_56804049	44.58
novel_mir816	16	miRNA	NC_000072.6:+:108668953_108669019	0.92
novel_mir818	149	miRNA	NC_000073.6:-:144210548_144210603	8.59
novel_mir819	35	miRNA	NC_000077.6:-:121386678_121386739	2.02
novel_mir826	220	miRNA	NC_000070.6:-:8532592_8532670	12.69
novel_mir829	45	miRNA	NC_000071.6:+:76857812_76857865	2.6
novel_mir836	37	miRNA	NC_000076.6:-:92677853_92677932	2.13
novel_mir837	18	miRNA	NC_000070.6:+:8606486_8606563	1.04
novel_mir842	64	miRNA	NC_000082.6:+:5188152_5188235	3.69
novel_mir846	27	miRNA	NC_000071.6:-:114325599_114325679	1.56
novel_mir852	16	miRNA	NC_000077.6:+:55514822_55514876	0.92
novel_mir853	91	miRNA	NC_000073.6:-:125868381_125868451	5.25
novel_mir855	101	miRNA	NC_000075.6:-:108079010_108079083	5.82
novel_mir804	71	miRNA	NC_000083.6:-:27216607_27216664	4.09
novel_mir227	208	miRNA	NC_000070.6:-:135634617_135634666	12
novel_mir869	27	miRNA	NC_000072.6:-:89438643_89438723	1.56
novel_mir870	81	miRNA	NT_187023.1:-:1254037_1254083	4.67
novel_mir878	96	miRNA	NC_000069.6:+:51521758_51521796	5.54
novel_mir880	16	miRNA	NC_000077.6:+:117968516_117968557	0.92
novel_mir882	27	miRNA	NC_000079.6:-:10374331_10374402	1.56
novel_mir884	24	miRNA	NC_000067.6:+:34035600_34035671	1.38
novel_mir890	10	miRNA	NC_000079.6:-:75069122_75069189	0.58
novel_mir892	76	miRNA	NC_000075.6:-:121640467_121640519	4.38
novel_mir897	35	miRNA	NC_000069.6:-:107617417_107617492	2.02
novel_mir899	119	miRNA	NC_000071.6:+:129460913_129460990	6.86
novel_mir907	13	miRNA	NC_000085.6:+:17026962_17027031	0.75
novel_mir908	19	miRNA	NC_000079.6:-:34479004_34479043	1.1
novel_mir909	193	miRNA	NC_000074.6:-:13701532_13701579	11.13
novel_mir912	26	miRNA	NC_000068.7:-:173564818_173564864	1.5
novel_mir861	35	miRNA	NC_000073.6:-:28746063_28746113	2.02
novel_mir916	230	miRNA	NC_000067.6:-:63994402_63994469	13.26
novel_mir354	17	miRNA	NC_000082.6:-:87553491_87553557	0.98
novel_mir926	14	miRNA	NC_000067.6:+:118676607_118676661	0.81
novel_mir168	13	miRNA	NC_000075.6:+:107627252_107627338	0.75
novel_mir935	44	miRNA	NC_000078.6:-:87866088_87866153	2.54
novel_mir942	58	miRNA	NC_000068.7:+:68960892_68960968	3.34
novel_mir947	20	miRNA	NC_000070.6:+:11882669_11882743	1.15
novel_mir964	37	miRNA	NC_000069.6:-:104754993_104755041	2.13
novel_mir972	16	miRNA	NC_000076.6:-:61168681_61168735	0.92
novel_mir973	64	miRNA	NC_000082.6:-:62854163_62854224	3.69
novel_mir984	252	miRNA	NC_000073.6:-:55689411_55689471	14.53
novel_mir991	50	miRNA	NC_000085.6:+:7275585_7275670	2.88
novel_mir999	11	miRNA	NC_000079.6:+:40558279_40558349	0.63
novel_mir1004	15	miRNA	NC_000078.6:-:100088854_100088926	0.87
novel_mir1010	47	miRNA	NC_000071.6:+:114388297_114388362	2.71
novel_mir1011	35	miRNA	NC_000084.6:-:11143524_11143583	2.02
novel_mir1019	18	miRNA	NC_000068.7:+:71755979_71756041	1.04
novel_mir1021	288	miRNA	NC_000085.6:-:8896188_8896255	16.61
novel_mir1025	238	miRNA	NC_000084.6:+:42800815_42800882	13.73
novel_mir1030	178	miRNA	NC_000077.6:+:11967536_11967586	10.27
novel_mir1044	17	miRNA	NC_000081.6:-:74230456_74230495	0.98
novel_mir1045	389	miRNA	NC_000073.6:-:126509798_126509840	22.43
novel_mir1046	1580	miRNA	NC_000076.6:-:7176027_7176111	91.12
novel_mir1051	14	miRNA	NC_000086.7:+:169106320_169106392	0.81
novel_mir1053	17	miRNA	NC_000071.6:+:52676141_52676192	0.98
novel_mir1056	15	miRNA	NC_000072.6:+:119433752_119433811	0.87
novel_mir1060	15	miRNA	NC_000071.6:+:140916506_140916570	0.87
novel_mir1062	68	miRNA	NC_000086.7:-:118296696_118296752	3.92
novel_mir227	1099	miRNA	NW_012132911.1:+:64920_64968	63.38
novel_mir1070	33	miRNA	NC_000067.6:-:170523918_170523967	1.9
novel_mir1072	115	miRNA	NC_000072.6:+:88807982_88808052	6.63
novel_mir1076	15	miRNA	NC_000068.7:-:157814821_157814869	0.87
novel_mir1079	160	miRNA	NC_000081.6:-:72645421_72645502	9.23
novel_mir1085	20	miRNA	NC_000083.6:+:66703455_66703546	1.15
novel_mir1086	39	miRNA	NC_000085.6:-:46319638_46319697	2.25
novel_mir1092	12	miRNA	NC_000077.6:+:119426593_119426660	0.69
novel_mir1094	80	miRNA	NC_000073.6:-:125451652_125451706	4.61
novel_mir1102	22	miRNA	NC_000072.6:+:101250225_101250269	1.27
novel_mir958	13	miRNA	NC_000073.6:+:112023076_112023147	0.75
novel_mir1113	29	miRNA	NC_000081.6:+:79934284_79934345	1.67
novel_mir1122	13	miRNA	NC_000081.6:-:76698432_76698501	0.75
novel_mir1127	17	miRNA	NC_000073.6:-:100677403_100677462	0.98
novel_mir1129	65	miRNA	NC_000068.7:-:4063424_4063514	3.75
novel_mir1130	10	miRNA	NC_000072.6:+:32821012_32821080	0.58
novel_mir905	40	miRNA	NC_000086.7:+:101522578_101522643	2.31
novel_mir1132	11	miRNA	NC_000077.6:+:78202948_78203006	0.63
novel_mir1133	24	miRNA	NC_000077.6:+:94942817_94942889	1.38
novel_mir1141	19	miRNA	NC_000083.6:+:56443413_56443453	1.1
novel_mir1150	5349	miRNA	NC_000079.6:-:73470659_73470735	308.48
novel_mir1154	13	miRNA	NC_000079.6:+:96242342_96242407	0.75
novel_mir1156	10	miRNA	NC_000070.6:-:134222506_134222585	0.58
novel_mir1158	19	miRNA	NC_000073.6:+:29802466_29802550	1.1
novel_mir1160	22	miRNA	NC_000069.6:+:107159414_107159476	1.27
novel_mir1161	30	miRNA	NC_000070.6:+:119952952_119953008	1.73
novel_mir1162	33	miRNA	NC_000081.6:-:99685119_99685171	1.9
novel_mir1165	366	miRNA	NC_000075.6:-:21837062_21837109	21.11
novel_mir1176	68	miRNA	NC_000073.6:+:79744777_79744843	3.92
novel_mir1178	14	miRNA	NC_000079.6:-:113691771_113691845	0.81
novel_mir1185	34	miRNA	NC_000080.6:+:33856817_33856890	1.96
novel_mir1186	10	miRNA	NC_000079.6:-:64184658_64184717	0.58
novel_mir1187	19	miRNA	NC_000082.6:+:22318930_22318975	1.1
novel_mir1192	13	miRNA	NC_000067.6:-:39894900_39894940	0.75
novel_mir1198	10	miRNA	NC_000075.6:-:49122344_49122383	0.58
novel_mir1207	85	miRNA	NC_000082.6:-:94070082_94070138	4.9
novel_mir1208	139	miRNA	NC_000071.6:+:114004855_114004913	8.02
novel_mir1210	86	miRNA	NC_000084.6:+:74502694_74502753	4.96
novel_mir1211	166	miRNA	NC_000076.6:-:43412389_43412491	9.57
novel_mir1212	250	miRNA	NC_000072.6:-:81452979_81453048	14.42
novel_mir1215	76	miRNA	NC_000073.6:+:44386434_44386482	4.38
novel_mir1222	55	miRNA	NC_000071.6:-:60344972_60345028	3.17
novel_mir1223	36	miRNA	NC_000085.6:+:41030010_41030068	2.08
novel_mir1225	242	miRNA	NC_000068.7:+:120036608_120036679	13.96
novel_mir227	120	miRNA	NC_000073.6:-:30751324_30751387	6.92
novel_mir1238	14	miRNA	NC_000076.6:+:108495052_108495113	0.81
novel_mir1239	20	miRNA	NC_000080.6:+:89263332_89263416	1.15
novel_mir1246	15	miRNA	NC_000078.6:+:87098435_87098502	0.87
novel_mir1251	29	miRNA	NC_000073.6:-:25032214_25032290	1.67
novel_mir1266	20	miRNA	NC_000069.6:+:127646567_127646623	1.15
novel_mir1274	28	miRNA	NC_000067.6:+:12639468_12639525	1.61
novel_mir1282	39644	miRNA	NC_000084.6:-:5602308_5602382	2286.28
novel_mir1286	13	miRNA	NC_000075.6:-:107681411_107681490	0.75
novel_mir1299	15	miRNA	NC_000077.6:-:94391261_94391303	0.87
novel_mir1304	16	miRNA	NC_000068.7:-:154806275_154806353	0.92
novel_mir1308	62	miRNA	NC_000076.6:+:7334749_7334813	3.58
novel_mir1312	12	miRNA	NC_000069.6:-:109019806_109019875	0.69
novel_mir1316	13	miRNA	NC_000073.6:+:4770232_4770300	0.75
novel_mir1328	13	miRNA	NC_000082.6:-:87490025_87490078	0.75
novel_mir1345	583	miRNA	NC_000086.7:-:8125400_8125477	33.62
novel_mir1351	28	miRNA	NC_000068.7:-:146428224_146428310	1.61
novel_mir1352	17	miRNA	NC_000072.6:+:147604643_147604718	0.98
novel_mir1358	10	miRNA	NC_000067.6:-:36119703_36119757	0.58
novel_mir1359	39	miRNA	NC_000084.6:-:26874268_26874351	2.25
novel_mir1360	175	miRNA	NC_000081.6:+:96743550_96743627	10.09
novel_mir1368	19	miRNA	NC_000073.6:-:136790436_136790483	1.1
novel_mir1369	176	miRNA	NC_000080.6:-:95706449_95706531	10.15
novel_mir1380	53	miRNA	NC_000070.6:+:127984683_127984746	3.06
novel_mir1381	12	miRNA	NC_000086.7:+:102805139_102805203	0.69
novel_mir1395	37	miRNA	NC_000075.6:+:108613284_108613328	2.13
novel_mir1403	34	miRNA	NC_000072.6:-:101114298_101114354	1.96
novel_mir1407	202	miRNA	NC_000081.6:+:58075574_58075660	11.65
novel_mir1408	46	miRNA	NC_000079.6:-:13845266_13845329	2.65
novel_mir573	113	miRNA	NC_000077.6:-:5559291_5559325	6.52
novel_mir1411	35	miRNA	NC_000079.6:-:63680229_63680308	2.02
novel_mir1424	15	miRNA	NC_000067.6:-:186225899_186225979	0.87
novel_mir1425	39	miRNA	NC_000077.6:-:69609620_69609679	2.25
novel_mir1429	65	miRNA	NC_000067.6:-:167159608_167159669	3.75
novel_mir1431	14	miRNA	NC_000084.6:+:62347452_62347512	0.81
novel_mir1437	27	miRNA	NC_000083.6:-:92627882_92627972	1.56
novel_mir1442	86	miRNA	NC_000067.6:-:11488076_11488138	4.96
novel_mir1450	19	miRNA	NC_000082.6:+:94335839_94335904	1.1
novel_mir227	349	miRNA	NC_000085.6:+:47753056_47753103	20.13
novel_mir1454	232	miRNA	NC_000077.6:-:35366470_35366555	13.38
novel_mir1456	27	miRNA	NC_000076.6:-:127312380_127312443	1.56
novel_mir1458	14	miRNA	NC_000068.7:-:27270265_27270340	0.81
novel_mir1465	37	miRNA	NC_000080.6:-:67638447_67638507	2.13
novel_mir1466	11	miRNA	NC_000073.6:+:96797287_96797356	0.63
novel_mir1469	22	miRNA	NC_000070.6:-:127227072_127227136	1.27
novel_mir1477	21	miRNA	NC_000084.6:-:46875349_46875424	1.21
novel_mir1489	53	miRNA	NC_000079.6:+:13687635_13687725	3.06
novel_mir1491	12	miRNA	NC_000074.6:-:117410523_117410589	0.69
novel_mir1496	126	miRNA	NC_000067.6:+:88398029_88398097	7.27
novel_mir1500	93	miRNA	NC_000077.6:+:85923572_85923654	5.36
novel_mir1502	57	miRNA	NC_000068.7:-:3748926_3748993	3.29
novel_mir1512	10	miRNA	NC_000073.6:-:44630618_44630674	0.58
novel_mir1514	45	miRNA	NC_000084.6:-:37343235_37343308	2.6
novel_mir1520	26	miRNA	NC_000083.6:+:15089099_15089150	1.5
novel_mir1527	21	miRNA	NC_000077.6:+:107560200_107560260	1.21
novel_mir1529	25	miRNA	NC_000067.6:+:134487133_134487208	1.44
novel_mir1531	12	miRNA	NC_000072.6:-:63079480_63079574	0.69
novel_mir1534	44	miRNA	NC_000078.6:+:86161076_86161142	2.54
novel_mir1535	88	miRNA	NC_000071.6:+:39248474_39248514	5.07
novel_mir1538	650	miRNA	NC_000083.6:-:51820104_51820165	37.49
novel_mir1542	47	miRNA	NC_000082.6:-:61723711_61723757	2.71
novel_mir1546	23	miRNA	NT_187023.1:+:134499_134574	1.33
novel_mir1549	10	miRNA	NC_000083.6:-:4507530_4507589	0.58
novel_mir1556	18	miRNA	NC_000073.6:+:83857457_83857522	1.04
novel_mir1559	67	miRNA	NC_000084.6:-:82493885_82493966	3.86
novel_mir1565	40	miRNA	NC_000075.6:-:113489507_113489552	2.31
novel_mir1566	133	miRNA	NC_000072.6:-:94943283_94943366	7.67
novel_mir1569	13	miRNA	NC_000079.6:-:69521799_69521863	0.75
novel_mir1570	54	miRNA	NC_000070.6:-:93638413_93638486	3.11
novel_mir227	28	miRNA	NC_000075.6:-:119941103_119941159	1.61
novel_mir1575	46	miRNA	NC_000079.6:-:56221062_56221119	2.65
novel_mir1578	119	miRNA	NC_000071.6:+:113864723_113864780	6.86
novel_mir1579	19	miRNA	NC_000086.7:-:36856580_36856650	1.1
novel_mir1581	18	miRNA	NC_000082.6:+:95861177_95861258	1.04
novel_mir1584	15	miRNA	NC_000077.6:-:11394826_11394866	0.87
novel_mir1585	68	miRNA	NC_000068.7:-:99653682_99653743	3.92
novel_mir1588	35	miRNA	NC_000071.6:-:72648304_72648386	2.02
novel_mir1589	347	miRNA	NC_000069.6:+:95384184_95384270	20.01
novel_mir1594	32	miRNA	NC_000075.6:+:94705835_94705903	1.85
novel_mir1596	890	miRNA	NC_000077.6:+:78845717_78845812	51.33
novel_mir1597	88	miRNA	NC_000073.6:+:113795332_113795404	5.07
novel_mir1598	36	miRNA	NC_000075.6:+:63831217_63831301	2.08
novel_mir1601	23	miRNA	NC_000075.6:-:69764330_69764379	1.33
novel_mir1603	64	miRNA	NC_000076.6:-:20659024_20659116	3.69
novel_mir1607	346	miRNA	NC_000067.6:+:181015121_181015174	19.95
novel_mir1609	20	miRNA	NC_000071.6:-:148127942_148127997	1.15
novel_mir1611	52	miRNA	NC_000086.7:+:67762534_67762608	3
novel_mir1619	13	miRNA	NC_000067.6:-:59280049_59280123	0.75
novel_mir1620	79	miRNA	NC_000074.6:+:119839920_119839966	4.56
novel_mir1634	134	miRNA	NC_000080.6:-:66892527_66892569	7.73
novel_mir1637	34	miRNA	NC_000073.6:+:102210338_102210419	1.96
novel_mir1646	231	miRNA	NC_000081.6:+:20042889_20042939	13.32
novel_mir1652	102	miRNA	NC_000071.6:-:48321155_48321223	5.88
novel_mir1573	361	miRNA	NC_000069.6:-:93987361_93987434	20.82
novel_mir1657	68	miRNA	NC_000084.6:+:69369494_69369550	3.92
novel_mir1661	47	miRNA	NC_000069.6:-:121768691_121768738	2.71
novel_mir1662	31	miRNA	NC_000081.6:-:101181760_101181829	1.79
novel_mir1663	66	miRNA	NC_000077.6:+:32166964_32167012	3.81
novel_mir1667	38	miRNA	NC_000069.6:-:149107186_149107254	2.19
novel_mir1670	2725	miRNA	NC_000077.6:+:80199178_80199233	157.15
novel_mir1676	13	miRNA	NC_000074.6:-:119497257_119497300	0.75
novel_mir1679	92	miRNA	NC_000068.7:+:18065925_18066009	5.31
novel_mir1681	31	miRNA	NC_000067.6:-:127259123_127259177	1.79
novel_mir1682	33	miRNA	NC_000074.6:-:119486941_119487012	1.9
novel_mir1685	22	miRNA	NC_000079.6:-:95861396_95861446	1.27
novel_mir1701	27	miRNA	NC_000077.6:+:75181683_75181757	1.56
novel_mir1702	62	miRNA	NC_000078.6:+:31670553_31670602	3.58
novel_mir1708	134	miRNA	NC_000085.6:-:7406036_7406105	7.73
novel_mir1710	188	miRNA	NC_000068.7:-:55849439_55849496	10.84
novel_mir1712	21	miRNA	NC_000076.6:-:75818648_75818716	1.21
novel_mir1714	17	miRNA	NC_000070.6:-:108330946_108331005	0.98
novel_mir1730	90	miRNA	NC_000081.6:-:83817532_83817591	5.19
novel_mir1738	13	miRNA	NC_000081.6:+:78017341_78017413	0.75
novel_mir1744	351	miRNA	NC_000081.6:-:88024592_88024674	20.24
novel_mir1750	206	miRNA	NC_000078.6:+:12316111_12316186	11.88
novel_mir1754	11	miRNA	NC_000083.6:+:30688288_30688341	0.63
novel_mir1766	73	miRNA	NC_000073.6:-:18275293_18275365	4.21
novel_mir1768	101	miRNA	NC_000078.6:-:118732919_118732987	5.82
novel_mir1771	24	miRNA	NC_000070.6:+:9534300_9534341	1.38
novel_mir1773	11	miRNA	NC_000075.6:+:119742991_119743048	0.63
novel_mir1780	11	miRNA	NC_000085.6:-:17376799_17376880	0.63
novel_mir1782	10	miRNA	NC_000077.6:+:105447929_105447971	0.58
novel_mir1783	96	miRNA	NC_000082.6:-:30505904_30505951	5.54
novel_mir1786	69	miRNA	NC_000068.7:+:49298470_49298537	3.98
novel_mir1792	631	miRNA	NC_000068.7:+:160479522_160479574	36.39
novel_mir1794	19	miRNA	NC_000068.7:+:121181619_121181659	1.1
novel_mir1798	19	miRNA	NC_000086.7:+:69994653_69994706	1.1
novel_mir1799	18	miRNA	NC_000071.6:+:33540863_33540915	1.04
novel_mir1800	13	miRNA	NC_000076.6:-:21783528_21783573	0.75
novel_mir1811	45	miRNA	NC_000076.6:+:66884407_66884479	2.6
novel_mir1814	829	miRNA	NC_000075.6:-:56837903_56837992	47.81
novel_mir1818	85	miRNA	NC_000070.6:-:124075963_124076018	4.9
novel_mir1819	42	miRNA	NC_000073.6:-:122529889_122529950	2.42
novel_mir1821	100	miRNA	NC_000076.6:+:29781556_29781599	5.77
novel_mir1822	75	miRNA	NC_000076.6:+:99196774_99196852	4.33
novel_mir1828	11	miRNA	NC_000071.6:-:74766902_74766946	0.63
novel_mir1830	18	miRNA	NC_000072.6:+:67421604_67421651	1.04
novel_mir1834	17	miRNA	NC_000082.6:-:12650870_12650921	0.98
novel_mir1846	12	miRNA	NC_000086.7:-:147141143_147141232	0.69
novel_mir1848	40	miRNA	NC_000069.6:-:51907760_51907811	2.31
novel_mir1849	35	miRNA	NC_000086.7:-:134208313_134208379	2.02
novel_mir1850	107	miRNA	NC_000071.6:+:140698861_140698934	6.17
novel_mir1854	30	miRNA	NC_000068.7:-:167384262_167384316	1.73
novel_mir1856	20	miRNA	NC_000080.6:+:24097308_24097380	1.15
novel_mir1862	59	miRNA	NC_000085.6:+:29754687_29754757	3.4
novel_mir1863	126	miRNA	NC_000084.6:+:12769863_12769950	7.27
novel_mir1867	13	miRNA	NC_000067.6:+:138701294_138701362	0.75
novel_mir1876	120	miRNA	NC_000077.6:+:32198553_32198605	6.92
novel_mir1877	15	miRNA	NC_000067.6:+:125404261_125404325	0.87
novel_mir1694	14	miRNA	NT_187025.1:+:452852_452930	0.81
novel_mir1889	42	miRNA	NC_000079.6:-:11147005_11147054	2.42
novel_mir1899	175	miRNA	NC_000075.6:-:86830829_86830887	10.09
novel_mir1902	33	miRNA	NC_000071.6:+:21174358_21174446	1.9
novel_mir1903	368	miRNA	NC_000069.6:-:88147979_88148035	21.22
novel_mir1905	11	miRNA	NC_000067.6:-:134010780_134010852	0.63
novel_mir1911	22	miRNA	NC_000078.6:-:95291925_95291986	1.27
novel_mir1914	13	miRNA	NC_000083.6:-:29683834_29683881	0.75
novel_mir1920	94	miRNA	NC_000077.6:-:113662198_113662258	5.42
novel_mir1923	11	miRNA	NC_000071.6:+:121282071_121282155	0.63
novel_mir1925	175	miRNA	NC_000079.6:+:73113105_73113156	10.09
novel_mir1927	109	miRNA	NC_000072.6:+:45383645_45383732	6.29
novel_mir1932	10	miRNA	NC_000068.7:+:65461321_65461388	0.58
novel_mir1681	148	miRNA	NC_000076.6:+:127706400_127706462	8.54
novel_mir1936	124	miRNA	NC_000074.6:-:117303335_117303381	7.15
novel_mir1946	197	miRNA	NC_000072.6:+:81868897_81868960	11.36
novel_mir1947	66	miRNA	NC_000070.6:+:141522227_141522294	3.81
novel_mir1953	48	miRNA	NC_000082.6:-:83168706_83168771	2.77
novel_mir1958	51	miRNA	NC_000070.6:-:79542830_79542895	2.94
novel_mir1960	146	miRNA	NC_000083.6:-:44214626_44214716	8.42
novel_mir1961	19	miRNA	NC_000072.6:-:64985016_64985097	1.1
novel_mir1964	17	miRNA	NC_000077.6:-:113606245_113606306	0.98
novel_mir1967	117	miRNA	NC_000073.6:+:131149167_131149240	6.75
novel_mir1968	56	miRNA	NC_000075.6:-:86570556_86570621	3.23
novel_mir1971	201	miRNA	NC_000071.6:+:99512682_99512765	11.59
novel_mir1972	55	miRNA	NC_000077.6:-:86562896_86562940	3.17
novel_mir1975	30	miRNA	NC_000071.6:-:29008152_29008194	1.73
novel_mir1982	50	miRNA	NC_000069.6:-:96600966_96601032	2.88
novel_mir1986	164	miRNA	NC_000070.6:+:155905462_155905531	9.46
novel_mir1997	12	miRNA	NC_000073.6:+:140957677_140957732	0.69
novel_mir1999	25	miRNA	NC_000084.6:+:32281582_32281626	1.44
novel_mir2003	13	miRNA	NC_000075.6:+:113644044_113644117	0.75
novel_mir2008	35	miRNA	NC_000073.6:+:36023233_36023312	2.02
novel_mir2009	102	miRNA	NC_000075.6:+:80019767_80019818	5.88
novel_mir2010	14	miRNA	NC_000070.6:+:11349998_11350057	0.81
novel_mir2011	20	miRNA	NC_000078.6:+:84284985_84285063	1.15
novel_mir2012	30	miRNA	NT_187023.1:+:1386318_1386363	1.73
novel_mir2016	27	miRNA	NC_000074.6:-:28095019_28095099	1.56
novel_mir2021	56	miRNA	NC_000072.6:-:92219773_92219826	3.23
novel_mir2026	143	miRNA	NC_000068.7:-:162139153_162139215	8.25
novel_mir2029	66	miRNA	NC_000077.6:-:100331017_100331069	3.81
novel_mir2034	33	miRNA	NC_000077.6:+:5682107_5682159	1.9
novel_mir2036	44	miRNA	NC_000080.6:-:114460724_114460799	2.54
novel_mir2040	167	miRNA	NC_000073.6:+:113929642_113929693	9.63
novel_mir2052	32	miRNA	NC_000076.6:+:110091348_110091433	1.85
novel_mir2065	1984	miRNA	NC_000083.6:+:12675861_12675908	114.42
novel_mir2067	35	miRNA	NC_000072.6:+:29191767_29191804	2.02
novel_mir2074	74	miRNA	NC_000071.6:-:41202920_41202971	4.27
novel_mir2078	64	miRNA	NC_000071.6:+:119296441_119296512	3.69
novel_mir2079	2827	miRNA	NC_000072.6:+:89094370_89094444	163.03
novel_mir2089	42	miRNA	NC_000068.7:-:14213596_14213659	2.42
novel_mir2091	29	miRNA	NC_000074.6:+:75079032_75079095	1.67
novel_mir2103	12	miRNA	NC_000070.6:-:137531708_137531771	0.69
novel_mir2105	54	miRNA	NC_000072.6:-:119813285_119813346	3.11
novel_mir2109	144	miRNA	NC_000076.6:-:43429195_43429242	8.3
novel_mir2113	165	miRNA	NC_000079.6:+:26194534_26194582	9.52
novel_mir2114	51	miRNA	NC_000086.7:-:20715609_20715669	2.94
novel_mir2118	21	miRNA	NC_000067.6:+:36136460_36136502	1.21
novel_mir2124	19	miRNA	NC_000069.6:-:9244654_9244729	1.1
novel_mir2126	14	miRNA	NC_000069.6:+:105324028_105324097	0.81
novel_mir2132	126	miRNA	NC_000075.6:-:74856116_74856160	7.27
novel_mir2135	49	miRNA	NC_000069.6:-:124222289_124222350	2.83
novel_mir2140	12	miRNA	NC_000071.6:+:140586891_140586945	0.69
novel_mir2147	181	miRNA	NC_000078.6:+:30021411_30021468	10.44
novel_mir2158	23	miRNA	NC_000072.6:-:34697779_34697827	1.33
novel_mir2163	20	miRNA	NC_000075.6:-:56854629_56854715	1.15
novel_mir2167	20	miRNA	NC_000086.7:-:96616137_96616224	1.15
novel_mir2169	14	miRNA	NC_000072.6:-:28264234_28264286	0.81
novel_mir2174	28	miRNA	NC_000070.6:+:98352202_98352261	1.61
novel_mir2184	114	miRNA	NC_000085.6:-:56527712_56527774	6.57
novel_mir2191	36	miRNA	NC_000070.6:-:137555611_137555682	2.08
novel_mir2194	13	miRNA	NC_000076.6:+:90691190_90691284	0.75
novel_mir2197	54	miRNA	NC_000070.6:-:140540787_140540866	3.11
novel_mir2199	14	miRNA	NC_000067.6:-:128547661_128547751	0.81
novel_mir2210	194	miRNA	NC_000076.6:+:67210413_67210477	11.19
novel_mir2212	57	miRNA	NC_000083.6:+:46612837_46612923	3.29
novel_mir2213	17	miRNA	NC_000081.6:+:81784985_81785062	0.98
novel_mir2215	87	miRNA	NC_000074.6:-:84768832_84768894	5.02
novel_mir2217	116	miRNA	NC_000068.7:-:153498264_153498319	6.69
novel_mir2219	63	miRNA	NC_000084.6:-:85360269_85360347	3.63
novel_mir2221	22	miRNA	NC_000074.6:-:120357853_120357905	1.27
novel_mir2228	48	miRNA	NC_000079.6:-:73852248_73852328	2.77
novel_mir2233	35	miRNA	NC_000073.6:-:125325343_125325427	2.02
novel_mir2235	10	miRNA	NC_000075.6:+:26569513_26569563	0.58
novel_mir2250	12	miRNA	NC_000069.6:-:8734864_8734912	0.69
novel_mir2268	125	miRNA	NC_000072.6:+:33863270_33863348	7.21
novel_mir2272	16	miRNA	NC_000075.6:-:24727792_24727831	0.92
novel_mir2274	61	miRNA	NC_000075.6:+:58742091_58742128	3.52
novel_mir2277	11	miRNA	NC_000067.6:+:176866200_176866250	0.63
novel_mir2281	20	miRNA	NC_000072.6:-:121212050_121212091	1.15
novel_mir2284	1643	miRNA	NC_000077.6:+:51186164_51186217	94.75
novel_mir2286	30	miRNA	NC_000079.6:-:71933615_71933669	1.73
novel_mir2287	45	miRNA	NC_000081.6:-:53758265_53758318	2.6
novel_mir2290	23	miRNA	NC_000080.6:+:63193639_63193695	1.33
novel_mir2294	68	miRNA	NC_000083.6:+:26542417_26542462	3.92
novel_mir2298	12	miRNA	NC_000080.6:+:45901219_45901312	0.69
novel_mir2308	48	miRNA	NC_000068.7:-:163764148_163764219	2.77
novel_mir2313	21	miRNA	NC_000073.6:+:47103169_47103213	1.21
novel_mir2322	145	miRNA	NC_000068.7:-:51855463_51855517	8.36
novel_mir2327	43	miRNA	NT_187022.1:+:330611_330684	2.48
novel_mir2334	10	miRNA	NC_000068.7:+:167890015_167890102	0.58
novel_mir2343	10	miRNA	NC_000071.6:-:96848435_96848514	0.58
novel_mir2355	725	miRNA	NC_000079.6:+:93394677_93394761	41.81
novel_mir2357	54	miRNA	NC_000073.6:-:142685571_142685643	3.11
novel_mir2360	28	miRNA	NC_000085.6:-:31207819_31207874	1.61
novel_mir2366	46	miRNA	NC_000071.6:+:25426148_25426201	2.65
novel_mir2368	37	miRNA	NC_000068.7:+:161388004_161388055	2.13
novel_mir2372	21	miRNA	NC_000080.6:-:103030224_103030312	1.21
novel_mir2373	32	miRNA	NC_000085.6:-:34000969_34001004	1.85
novel_mir2383	11	miRNA	NC_000072.6:+:128364525_128364596	0.63
novel_mir2403	45	miRNA	NC_000084.6:+:34259625_34259668	2.6
novel_mir2406	33	miRNA	NC_000071.6:-:6293853_6293906	1.9
novel_mir2411	245	miRNA	NC_000070.6:-:152526429_152526483	14.13
novel_mir2422	48	miRNA	NC_000071.6:-:21121289_21121348	2.77
novel_mir2427	21	miRNA	NC_000078.6:-:70182824_70182870	1.21
novel_mir2436	39	miRNA	NC_000077.6:+:88365288_88365330	2.25
novel_mir2438	50	miRNA	NC_000076.6:-:75176824_75176881	2.88
novel_mir2444	35	miRNA	NC_000077.6:-:49991134_49991208	2.02
novel_mir2447	182	miRNA	NC_000076.6:+:29056157_29056233	10.5
novel_mir238	97	miRNA	NC_000082.6:+:91904184_91904243	5.59
novel_mir2464	34	miRNA	NC_000073.6:-:109614472_109614549	1.96
novel_mir2466	33	miRNA	NC_000069.6:-:57954436_57954495	1.9
novel_mir2470	10	miRNA	NC_000069.6:+:57883655_57883695	0.58
novel_mir2474	38	miRNA	NC_000072.6:+:50279244_50279330	2.19
novel_mir2477	13	miRNA	NC_000085.6:-:52677438_52677524	0.75
novel_mir2483	32	miRNA	NC_000067.6:-:189158873_189158918	1.85
novel_mir2489	25	miRNA	NC_000070.6:-:57566617_57566676	1.44
novel_mir2490	121	miRNA	NC_000079.6:+:109806289_109806366	6.98
novel_mir2498	616	miRNA	NC_000077.6:-:23089516_23089573	35.52
novel_mir825	31	miRNA	NC_000075.6:-:120746523_120746624	1.79
novel_mir2513	138	miRNA	NC_000070.6:-:119058697_119058754	7.96
novel_mir2520	20	miRNA	NC_000079.6:+:107628491_107628578	1.15
novel_mir2531	27	miRNA	NC_000079.6:-:118364024_118364093	1.56
novel_mir2533	165	miRNA	NC_000075.6:-:10441370_10441421	9.52
novel_mir2536	22	miRNA	NC_000085.6:+:53670823_53670864	1.27
novel_mir227	595	miRNA	NC_000068.7:-:9959831_9959923	34.31
novel_mir2549	53	miRNA	NC_000069.6:-:40131771_40131813	3.06
novel_mir2554	11	miRNA	NC_000071.6:-:52511371_52511443	0.63
novel_mir2558	11	miRNA	NC_000079.6:+:31519384_31519447	0.63
novel_mir2568	55	miRNA	NC_000071.6:+:146695593_146695678	3.17
novel_mir1180	24	miRNA	NC_000067.6:-:63767150_63767228	1.38
novel_mir2572	104	miRNA	NC_000076.6:+:13426093_13426143	6
novel_mir2584	348	miRNA	NC_000067.6:+:128542595_128542636	20.07
novel_mir2597	868	miRNA	NC_000075.6:-:12205861_12205966	50.06
novel_mir2258	20	miRNA	NC_000085.6:-:60280780_60280853	1.15
novel_mir2612	41	miRNA	NC_000082.6:+:30831738_30831788	2.36
novel_mir2613	36	miRNA	NC_000074.6:+:46832097_46832140	2.08
novel_mir2618	26	miRNA	NC_000073.6:-:40412680_40412727	1.5
novel_mir2622	26	miRNA	NC_000079.6:-:46413678_46413741	1.5
novel_mir2631	41	miRNA	NC_000072.6:+:93526670_93526737	2.36
novel_mir2633	105	miRNA	NC_000072.6:+:40078983_40079068	6.06
novel_mir2634	12	miRNA	NC_000069.6:-:109451276_109451356	0.69
novel_mir2644	26	miRNA	NC_000070.6:-:46748443_46748508	1.5
novel_mir2646	207	miRNA	NC_000075.6:-:51262720_51262766	11.94
novel_mir2653	15	miRNA	NC_000074.6:+:120926842_120926917	0.87
novel_mir2668	44	miRNA	NC_000073.6:-:45217363_45217400	2.54
novel_mir2673	21	miRNA	NC_000073.6:-:77979467_77979537	1.21
novel_mir2675	17	miRNA	NC_000078.6:-:93174540_93174584	0.98
novel_mir2677	14	miRNA	NC_000081.6:-:52036589_52036627	0.81
novel_mir2679	330	miRNA	NC_000074.6:+:117512461_117512496	19.03
novel_mir2686	13	miRNA	NC_000072.6:+:97369577_97369620	0.75
novel_mir2690	88	miRNA	NC_000084.6:-:24952601_24952644	5.07
novel_mir764	861	miRNA	NC_000072.6:+:115346224_115346315	49.65
novel_mir2703	43	miRNA	NC_000077.6:-:35443099_35443153	2.48
novel_mir2708	17	miRNA	NC_000071.6:-:92805694_92805733	0.98
novel_mir2714	28	miRNA	NC_000069.6:-:102086514_102086591	1.61
novel_mir2716	11	miRNA	NC_000073.6:+:3412343_3412407	0.63
novel_mir2722	469	miRNA	NC_000070.6:+:98104812_98104877	27.05
novel_mir2728	124	miRNA	NC_000084.6:+:67128671_67128718	7.15
novel_mir2737	36	miRNA	NC_000081.6:-:81491072_81491134	2.08
novel_mir2747	14	miRNA	NC_000075.6:+:108060688_108060748	0.81
novel_mir2748	11	miRNA	NC_000071.6:+:36084295_36084351	0.63
novel_mir2752	242	miRNA	NC_000073.6:+:55850246_55850305	13.96
novel_mir2764	16	miRNA	NC_000074.6:-:45524752_45524823	0.92
novel_mir2765	553	miRNA	NC_000080.6:+:78748939_78748978	31.89
novel_mir2766	34	miRNA	NC_000076.6:-:63070425_63070506	1.96
novel_mir2771	12	miRNA	NC_000081.6:-:71349989_71350063	0.69
novel_mir2772	18	miRNA	NC_000071.6:+:131158954_131158995	1.04
novel_mir2778	173	miRNA	NC_000070.6:-:153569532_153569583	9.98
novel_mir2779	20	miRNA	NC_000084.6:+:89170731_89170791	1.15
novel_mir2728	15	miRNA	NC_000084.6:+:67128625_67128690	0.87
novel_mir2789	11	miRNA	NC_000076.6:+:60265008_60265061	0.63
novel_mir2792	13	miRNA	NC_000078.6:-:29733010_29733083	0.75
novel_mir2800	153	miRNA	NC_000078.6:-:79079035_79079111	8.82
novel_mir2804	13	miRNA	NC_000070.6:+:34573545_34573613	0.75
novel_mir2805	13	miRNA	NC_000075.6:-:12443895_12443958	0.75
novel_mir2806	79	miRNA	NC_000072.6:-:110652301_110652350	4.56
novel_mir2829	21	miRNA	NC_000073.6:-:28699731_28699779	1.21
novel_mir2837	12	miRNA	NC_000081.6:+:59065784_59065860	0.69
novel_mir2846	104	miRNA	NC_000080.6:-:18409651_18409714	6
novel_mir227	225	miRNA	NC_000073.6:+:75152690_75152766	12.98
novel_mir2853	15	miRNA	NC_000073.6:-:143113334_143113387	0.87
novel_mir2649	77	miRNA	NC_000081.6:+:10647205_10647268	4.44
novel_mir2859	13	miRNA	NC_000068.7:+:37755468_37755555	0.75
novel_mir2860	33	miRNA	NC_000069.6:+:28252794_28252841	1.9
novel_mir2865	60	miRNA	NC_000079.6:+:19695335_19695410	3.46
novel_mir2870	87	miRNA	NC_000074.6:+:11997001_11997092	5.02
novel_mir2874	90	miRNA	NC_000073.6:+:105444641_105444716	5.19
novel_mir2886	114	miRNA	NC_000070.6:+:41328204_41328275	6.57
novel_mir2894	17	miRNA	NC_000083.6:+:66253021_66253081	0.98
novel_mir2898	32	miRNA	NC_000078.6:-:24679912_24679992	1.85
novel_mir2913	149	miRNA	NC_000075.6:-:44446092_44446151	8.59
novel_mir2926	50	miRNA	NC_000074.6:-:12178063_12178114	2.88
novel_mir800	40	miRNA	NC_000068.7:-:51073980_51074081	2.31
novel_mir2931	10	miRNA	NC_000069.6:+:77102936_77103020	0.58
novel_mir2940	60	miRNA	NC_000071.6:+:18286762_18286823	3.46
novel_mir2942	22	miRNA	NC_000081.6:+:102507806_102507896	1.27
novel_mir2958	11	miRNA	NC_000078.6:+:111993427_111993480	0.63
novel_mir2960	32	miRNA	NC_000083.6:-:50231609_50231655	1.85
novel_mir2961	24	miRNA	NC_000078.6:+:109949333_109949399	1.38
novel_mir2976	41	miRNA	NC_000076.6:-:104061721_104061795	2.36
novel_mir2979	14	miRNA	NC_000074.6:+:83783588_83783676	0.81
novel_mir2982	61	miRNA	NC_000070.6:+:37196946_37197024	3.52
novel_mir2986	42	miRNA	NC_000078.6:+:79376776_79376831	2.42
novel_mir2992	18	miRNA	NC_000068.7:-:154541030_154541101	1.04
novel_mir2995	55	miRNA	NC_000067.6:+:189992573_189992615	3.17
novel_mir2999	41	miRNA	NC_000077.6:-:45567919_45568006	2.36
novel_mir3000	48	miRNA	NC_000071.6:+:134749535_134749589	2.77
novel_mir3012	34	miRNA	NC_000069.6:-:108432139_108432198	1.96
novel_mir3015	13	miRNA	NC_000073.6:+:145119759_145119837	0.75
novel_mir3030	91	miRNA	NC_000078.6:+:92533601_92533704	5.25
novel_mir3039	51	miRNA	NC_000070.6:+:139413493_139413532	2.94
novel_mir3057	81	miRNA	NC_000071.6:-:141004577_141004634	4.67
novel_mir3059	37	miRNA	NC_000068.7:-:80355860_80355926	2.13
novel_mir3076	983	miRNA	NC_000079.6:+:110715938_110715978	56.69
novel_mir3077	10	miRNA	NC_000073.6:-:68377634_68377691	0.58
novel_mir3078	10	miRNA	NC_000071.6:-:139119028_139119086	0.58
novel_mir3086	17	miRNA	NC_000067.6:+:192341367_192341422	0.98
novel_mir3088	413	miRNA	NC_000078.6:+:55962344_55962396	23.82
novel_mir3096	99	miRNA	NC_000074.6:+:107119336_107119387	5.71
novel_mir3099	10	miRNA	NC_000067.6:-:40398743_40398803	0.58
novel_mir3101	22	miRNA	NC_000084.6:+:3544399_3544461	1.27
novel_mir3104	18	miRNA	NC_000067.6:+:27717095_27717134	1.04
novel_mir3107	71	miRNA	NC_000067.6:-:72846668_72846739	4.09
novel_mir3110	60	miRNA	NC_000074.6:+:118914727_118914769	3.46
novel_mir3113	77	miRNA	NT_039634.4:+:195734_195812	4.44
novel_mir3125	116	miRNA	NC_000078.6:-:87191349_87191411	6.69
novel_mir3127	30	miRNA	NC_000074.6:+:32710122_32710197	1.73
novel_mir3136	102	miRNA	NC_000070.6:+:40769473_40769523	5.88
novel_mir3141	162	miRNA	NC_000080.6:+:104072359_104072416	9.34
novel_mir3144	97	miRNA	NC_000083.6:+:5113343_5113396	5.59
novel_mir3147	63	miRNA	NC_000067.6:-:27424803_27424878	3.63
novel_mir3151	10	miRNA	NC_000070.6:+:85583202_85583288	0.58
novel_mir3153	26	miRNA	NC_000076.6:-:60918060_60918132	1.5
novel_mir3155	81	miRNA	NT_039662.3:+:29014_29081	4.67
novel_mir3166	13	miRNA	NC_000079.6:-:56947463_56947509	0.75
novel_mir3168	287	miRNA	NC_000079.6:+:106419335_106419374	16.55
novel_mir3179	243	miRNA	NC_000077.6:+:80938419_80938469	14.01
novel_mir3180	132	miRNA	NC_000068.7:+:163139730_163139804	7.61
novel_mir3185	12	miRNA	NC_000069.6:-:138148407_138148496	0.69
novel_mir3190	13	miRNA	NC_000079.6:+:111254909_111254967	0.75
novel_mir3193	65	miRNA	NC_000083.6:+:78814163_78814214	3.75
novel_mir3200	27	miRNA	NC_000083.6:+:8778129_8778179	1.56
novel_mir3206	42	miRNA	NC_000080.6:+:27543522_27543587	2.42
novel_mir1916	14	miRNA	NC_000081.6:+:12431943_12432021	0.81
novel_mir3225	27	miRNA	NC_000077.6:+:76888417_76888453	1.56
novel_mir3231	1412	miRNA	NC_000079.6:-:52935539_52935615	81.43
novel_mir3233	16	miRNA	NC_000085.6:-:55750394_55750466	0.92
novel_mir3235	367	miRNA	NC_000070.6:+:55717650_55717692	21.17
novel_mir3246	17	miRNA	NC_000068.7:-:126567283_126567348	0.98
novel_mir3248	64	miRNA	NC_000080.6:-:99208699_99208774	3.69
novel_mir3250	35	miRNA	NC_000079.6:-:37447676_37447757	2.02
novel_mir3251	10	miRNA	NC_000069.6:+:32266594_32266682	0.58
novel_mir3254	22	miRNA	NC_000082.6:+:76236471_76236538	1.27
novel_mir3265	35	miRNA	NC_000072.6:+:49105189_49105266	2.02
novel_mir3282	20	miRNA	NC_000067.6:+:180932196_180932243	1.15
novel_mir3285	11	miRNA	NC_000068.7:+:83647294_83647361	0.63
novel_mir3309	50	miRNA	NC_000068.7:-:174330027_174330087	2.88
novel_mir3291	273	miRNA	NC_000076.6:+:108968899_108968938	15.74
novel_mir3315	313	miRNA	NC_000081.6:-:93336478_93336541	18.05
novel_mir3325	13	miRNA	NC_000077.6:-:96119549_96119601	0.75
novel_mir3326	427	miRNA	NC_000084.6:+:69756486_69756565	24.63
novel_mir3336	1319	miRNA	NC_000068.7:+:156328044_156328086	76.07
novel_mir3372	167	miRNA	NC_000073.6:+:19230804_19230851	9.63
novel_mir3375	455	miRNA	NC_000067.6:+:167340412_167340468	26.24
novel_mir3375	10285	miRNA	NC_000082.6:-:11144080_11144136	593.14
novel_mir3379	1885	miRNA	NC_000067.6:-:167340422_167340480	108.71
novel_mir3385	10	miRNA	NC_000077.6:+:74818033_74818074	0.58
novel_mir3387	25	miRNA	NC_000078.6:-:5731005_5731056	1.44
novel_mir3393	95	miRNA	NC_000074.6:+:67021967_67022036	5.48
novel_mir3399	47	miRNA	NC_000067.6:-:29222397_29222443	2.71
novel_mir3406	14	miRNA	NC_000069.6:+:88950612_88950688	0.81
novel_mir3412	46	miRNA	NC_000078.6:+:103494544_103494620	2.65
novel_mir3415	90	miRNA	NC_000079.6:-:44444342_44444400	5.19
novel_mir3419	97	miRNA	NC_000073.6:-:79936332_79936378	5.59
novel_mir3420	94	miRNA	NC_000072.6:-:120601114_120601177	5.42
novel_mir3434	12	miRNA	NC_000071.6:+:88968566_88968629	0.69
novel_mir3436	10	miRNA	NC_000078.6:+:4082598_4082673	0.58
novel_mir3438	60	miRNA	NC_000081.6:+:68362725_68362784	3.46
novel_mir3441	140	miRNA	NC_000069.6:+:62159410_62159483	8.07
novel_mir3442	18	miRNA	NC_000074.6:+:104974414_104974456	1.04
novel_mir3446	400	miRNA	NC_000067.6:+:190529734_190529797	23.07
novel_mir3447	21	miRNA	NC_000081.6:-:84856140_84856193	1.21
novel_mir3457	107	miRNA	NC_000074.6:+:62736401_62736456	6.17
novel_mir3463	15	miRNA	NC_000072.6:+:140623584_140623639	0.87
novel_mir3469	54	miRNA	NC_000073.6:-:45793744_45793818	3.11
novel_mir3473	98	miRNA	NC_000067.6:+:182282293_182282373	5.65
novel_mir3476	42	miRNA	NC_000070.6:-:151861265_151861308	2.42
novel_mir3480	23	miRNA	NC_000077.6:-:23307176_23307229	1.33
novel_mir3468	15	miRNA	NT_166299.2:+:175297_175347	0.87
novel_mir3484	46	miRNA	NC_000077.6:-:102318969_102319017	2.65
novel_mir3491	18	miRNA	NC_000085.6:-:34547569_34547642	1.04
novel_mir3494	83	miRNA	NC_000075.6:+:62344412_62344463	4.79
novel_mir3495	39	miRNA	NC_000083.6:-:24438230_24438300	2.25
novel_mir3496	55	miRNA	NC_000070.6:+:119195355_119195418	3.17
novel_mir3498	7702	miRNA	NC_000073.6:-:109865616_109865693	444.18
novel_mir3500	10	miRNA	NC_000073.6:+:90129986_90130064	0.58
novel_mir3502	136	miRNA	NC_000071.6:+:29569393_29569469	7.84
novel_mir3504	35	miRNA	NC_000076.6:-:78097535_78097583	2.02
novel_mir3518	13	miRNA	NC_000079.6:+:102591634_102591707	0.75
novel_mir3529	193	miRNA	NC_000073.6:+:142659401_142659477	11.13
novel_mir3533	16	miRNA	NC_000073.6:+:32963847_32963897	0.92
novel_mir2	10	miRNA	NC_000075.6:-:61434764_61434811	0.58
novel_mir3537	139	miRNA	NC_000083.6:-:4994109_4994166	8.02
novel_mir3540	13	miRNA	NC_000072.6:-:23839349_23839407	0.75
novel_mir3541	10	miRNA	NC_000073.6:+:127912601_127912650	0.58
novel_mir3542	51	miRNA	NC_000077.6:-:95425053_95425153	2.94
novel_mir3543	66	miRNA	NC_000069.6:-:126597244_126597304	3.81
novel_mir3545	27	miRNA	NC_000067.6:+:36068469_36068525	1.56
novel_mir3550	193	miRNA	NC_000080.6:-:102348348_102348390	11.13
novel_mir3553	92	miRNA	NC_000079.6:-:45965204_45965262	5.31
novel_mir3554	33	miRNA	NC_000076.6:+:67127165_67127231	1.9
novel_mir3555	100	miRNA	NC_000068.7:-:171070600_171070661	5.77
novel_mir3557	140	miRNA	NC_000068.7:-:165234414_165234461	8.07
novel_mir3558	27	miRNA	NC_000075.6:+:42126209_42126254	1.56
novel_mir3563	61	miRNA	NC_000082.6:+:27616747_27616798	3.52
novel_mir2997	29	miRNA	NC_000073.6:-:19294856_19294906	1.67
novel_mir3564	14	miRNA	NC_000071.6:+:122158448_122158502	0.81
novel_mir3569	17	miRNA	NC_000070.6:+:152378345_152378415	0.98
novel_mir3578	56	miRNA	NC_000068.7:-:4122053_4122136	3.23
novel_mir3579	188	miRNA	NC_000073.6:+:4776939_4777004	10.84
novel_mir3580	770	miRNA	NC_000073.6:-:16614655_16614700	44.41
novel_mir3582	113	miRNA	NC_000078.6:+:113098863_113098900	6.52
novel_mir3583	368	miRNA	NC_000069.6:-:95995672_95995733	21.22
novel_mir3584	264	miRNA	NC_000073.6:-:73391092_73391148	15.22
novel_mir3587	359	miRNA	NC_000081.6:-:34982598_34982668	20.7
novel_mir3589	96	miRNA	NC_000075.6:+:108306522_108306605	5.54
novel_mir3597	1232	miRNA	NC_000069.6:-:95930051_95930113	71.05
novel_mir3603	21	miRNA	NC_000078.6:+:12668830_12668877	1.21
novel_mir3605	396	miRNA	NC_000073.6:-:141436979_141437032	22.84
novel_mir3606	62	miRNA	NC_000083.6:+:39848324_39848401	3.58
novel_mir3607	4865	miRNA	NC_000070.6:+:46344223_46344289	280.57
novel_mir3609	473	miRNA	NC_000083.6:-:12992092_12992147	27.28
novel_mir1761	39	miRNA	NC_000079.6:+:61649218_61649301	2.25
novel_mir3621	1271	miRNA	NC_000077.6:-:100473070_100473150	73.3
novel_mir3622	16	miRNA	NC_000074.6:-:12431245_12431319	0.92
novel_mir3626	21	miRNA	NC_000081.6:-:96698820_96698883	1.21
novel_mir3630	648	miRNA	NC_000077.6:+:119055947_119056013	37.37
novel_mir3636	307	miRNA	NC_000070.6:-:125906468_125906539	17.7
novel_mir3637	577	miRNA	NC_000071.6:+:5694067_5694107	33.28
novel_mir3638	58	miRNA	NC_000069.6:-:70080672_70080750	3.34
novel_mir3640	17	miRNA	NC_000078.6:-:71016520_71016577	0.98
novel_mir3641	120	miRNA	NC_000073.6:-:16615216_16615306	6.92
novel_mir3642	16	miRNA	NC_000081.6:+:103366734_103366813	0.92
novel_mir3651	11	miRNA	NC_000085.6:-:5840775_5840843	0.63
novel_mir3656	190	miRNA	NT_187026.1:-:759748_759816	10.96
novel_mir3657	76	miRNA	NC_000083.6:+:17138642_17138709	4.38
novel_mir3662	12	miRNA	NC_000072.6:+:135182437_135182484	0.69
novel_mir3666	150	miRNA	NC_000073.6:+:126081918_126081986	8.65
novel_mir3670	20	miRNA	NC_000078.6:+:101028870_101028938	1.15
novel_mir3671	253	miRNA	NT_187005.1:+:893298_893373	14.59
novel_mir3672	17	miRNA	NC_000078.6:+:116281552_116281622	0.98
novel_mir3679	31	miRNA	NC_000067.6:-:64121924_64121976	1.79
novel_mir3680	44	miRNA	NC_000071.6:-:31200573_31200657	2.54
novel_mir3685	13	miRNA	NC_000071.6:-:113128225_113128282	0.75
novel_mir3686	48	miRNA	NC_000070.6:-:129137452_129137521	2.77
novel_mir3689	63	miRNA	NC_000074.6:+:106870774_106870838	3.63
novel_mir3692	20	miRNA	NC_000073.6:-:30823720_30823777	1.15
novel_mir3699	19	miRNA	NC_000073.6:+:127708698_127708754	1.1
novel_mir3704	36	miRNA	NC_000071.6:-:52190476_52190522	2.08
novel_mir3524	542	miRNA	NC_000068.7:-:162661135_162661205	31.26
novel_mir3598	38	miRNA	NC_000072.6:-:30304196_30304246	2.19
novel_mir3722	12	miRNA	NC_000078.6:+:54566985_54567039	0.69
novel_mir3674	24	miRNA	NC_000084.6:-:67724076_67724124	1.38
novel_mir3724	14	miRNA	NC_000070.6:+:152273989_152274034	0.81
novel_mir3731	89	miRNA	NC_000073.6:+:24780619_24780692	5.13
novel_mir3733	62	miRNA	NC_000069.6:-:90519797_90519842	3.58
novel_mir3739	78	miRNA	NC_000076.6:+:40349377_40349437	4.5
novel_mir3741	20	miRNA	NC_000074.6:-:106135352_106135401	1.15
novel_mir3743	94	miRNA	NC_000075.6:-:94538070_94538115	5.42
novel_mir3746	26	miRNA	NC_000076.6:+:85102555_85102622	1.5
novel_mir3747	22	miRNA	NC_000068.7:-:9038743_9038822	1.27
novel_mir3749	68	miRNA	NC_000070.6:+:120287330_120287392	3.92
novel_mir3750	28	miRNA	NC_000080.6:+:54893789_54893825	1.61
novel_mir3751	46	miRNA	NC_000069.6:-:69696104_69696143	2.65
novel_mir3752	84	miRNA	NC_000080.6:-:50807606_50807672	4.84
novel_mir3753	192	miRNA	NC_000074.6:+:113319258_113319319	11.07
novel_mir3754	686	miRNA	NC_000076.6:-:62578043_62578109	39.56
novel_mir3755	18	miRNA	NC_000074.6:+:119503528_119503581	1.04
novel_mir3757	73	miRNA	NC_000070.6:-:98801072_98801145	4.21
novel_mir3767	17	miRNA	NC_000075.6:-:98037475_98037550	0.98
novel_mir3768	18	miRNA	NC_000081.6:+:67135273_67135341	1.04
novel_mir3770	159	miRNA	NC_000086.7:-:150366929_150367001	9.17
novel_mir3771	24	miRNA	NC_000068.7:-:35582012_35582096	1.38
novel_mir3774	1663	miRNA	NC_000082.6:+:91729459_91729536	95.91
novel_mir3593	14	miRNA	NC_000075.6:-:24503065_24503111	0.81
novel_mir3797	26	miRNA	NC_000084.6:-:37969762_37969808	1.5
novel_mir3565	82	miRNA	NC_000080.6:-:115042126_115042204	4.73
novel_mir3803	35	miRNA	NC_000068.7:-:93642586_93642626	2.02
novel_mir3804	13	miRNA	NC_000076.6:+:81321240_81321297	0.75
novel_mir3806	14	miRNA	NC_000076.6:+:128958076_128958128	0.81
novel_mir3817	25	miRNA	NC_000071.6:+:129584636_129584706	1.44
novel_mir3477	19	miRNA	NC_000082.6:-:18288903_18288947	1.1
novel_mir3832	15	miRNA	NC_000085.6:-:41482529_41482582	0.87
novel_mir3838	33	miRNA	NC_000084.6:+:57879172_57879214	1.9
novel_mir3840	46	miRNA	NC_000074.6:+:109737295_109737372	2.65
novel_mir3841	13	miRNA	NC_000081.6:+:79403193_79403260	0.75
novel_mir3845	14	miRNA	NC_000073.6:+:16313992_16314068	0.81
novel_mir3847	145	miRNA	NC_000077.6:+:107547816_107547871	8.36
novel_mir3848	3882	miRNA	NC_000070.6:+:134768028_134768071	223.88
novel_mir3850	48	miRNA	NC_000071.6:+:107289563_107289603	2.77
novel_mir3854	361	miRNA	NC_000071.6:-:35228973_35229045	20.82
novel_mir3857	59	miRNA	NC_000084.6:-:40219303_40219359	3.4
novel_mir3860	16	miRNA	NC_000068.7:-:168647489_168647531	0.92
novel_mir3861	64	miRNA	NC_000075.6:-:77512376_77512431	3.69
novel_mir3706	123	miRNA	NC_000074.6:-:116733250_116733319	7.09
novel_mir3868	33	miRNA	NC_000072.6:+:29545864_29545932	1.9
novel_mir3869	52	miRNA	NC_000068.7:-:60962377_60962421	3
novel_mir3484	12	miRNA	NC_000077.6:-:102318904_102318989	0.69
novel_mir3870	51	miRNA	NC_000072.6:-:88193573_88193631	2.94
novel_mir3871	14	miRNA	NC_000069.6:+:103102650_103102732	0.81
novel_mir3872	21	miRNA	NC_000071.6:-:144874698_144874776	1.21
novel_mir3873	27	miRNA	NC_000086.7:-:103165264_103165313	1.56
novel_mir3878	39	miRNA	NC_000073.6:+:130201920_130201974	2.25
novel_mir3885	93	miRNA	NC_000076.6:-:60819739_60819812	5.36
novel_mir3887	67	miRNA	NC_000069.6:-:10331285_10331333	3.86
novel_mir3890	41	miRNA	NT_187003.1:+:1207327_1207384	2.36
novel_mir3903	13	miRNA	NC_000076.6:+:80577088_80577157	0.75
novel_mir3906	13	miRNA	NT_039662.3:-:91964_92037	0.75
novel_mir3911	62	miRNA	NC_000070.6:-:132261008_132261062	3.58
novel_mir3912	51	miRNA	NC_000077.6:-:99993769_99993839	2.94
novel_mir3914	14	miRNA	NC_000079.6:-:98926217_98926303	0.81
novel_mir3916	41	miRNA	NC_000074.6:-:122460641_122460683	2.36
novel_mir3920	53	miRNA	NC_000079.6:-:54302823_54302870	3.06
novel_mir3922	14	miRNA	NC_000067.6:-:152766002_152766059	0.81
novel_mir3926	10	miRNA	NC_000075.6:-:21290857_21290920	0.58
novel_mir3927	13	miRNA	NC_000084.6:-:24020684_24020745	0.75
novel_mir3935	38	miRNA	NC_000070.6:-:130123005_130123064	2.19
novel_mir3936	122	miRNA	NC_000078.6:+:70825459_70825542	7.04
novel_mir3940	41	miRNA	NC_000071.6:-:61201180_61201242	2.36
novel_mir3948	25	miRNA	NC_000078.6:-:3834108_3834176	1.44
novel_mir3951	65	miRNA	NC_000067.6:+:133134969_133135033	3.75
novel_mir3952	20	miRNA	NC_000071.6:-:53213584_53213639	1.15
novel_mir3965	148	miRNA	NC_000075.6:+:75061412_75061454	8.54
novel_mir3971	17	miRNA	NC_000086.7:+:70401453_70401505	0.98
novel_mir3973	11	miRNA	NC_000072.6:+:28833454_28833507	0.63
novel_mir3977	15	miRNA	NC_000071.6:-:120609473_120609555	0.87
novel_mir3979	138	miRNA	NC_000076.6:-:117845846_117845920	7.96
novel_mir3983	59	miRNA	NC_000068.7:+:152150606_152150670	3.4
novel_mir3985	12513	miRNA	NC_000067.6:+:52232367_52232451	721.63
novel_mir3986	16	miRNA	NC_000075.6:-:114476777_114476843	0.92
novel_mir3987	59	miRNA	NC_000075.6:-:107634364_107634401	3.4
novel_mir3989	49	miRNA	NC_000075.6:+:39439181_39439257	2.83
novel_mir3990	19	miRNA	NC_000083.6:-:86755031_86755101	1.1
novel_mir3999	201	miRNA	NC_000070.6:-:129542635_129542718	11.59
novel_mir4006	83	miRNA	NC_000078.6:-:80115616_80115676	4.79
novel_mir4007	214	miRNA	NC_000074.6:-:106415758_106415806	12.34
novel_mir4010	41	miRNA	NC_000068.7:-:163481822_163481888	2.36
novel_mir4013	11	miRNA	NC_000073.6:-:44491560_44491619	0.63
novel_mir4014	28	miRNA	NC_000067.6:-:39536030_39536118	1.61
novel_mir4015	12	miRNA	NC_000079.6:+:48593283_48593335	0.69
novel_mir4021	43	miRNA	NC_000077.6:+:85843855_85843909	2.48
novel_mir4026	78	miRNA	NC_000081.6:-:101144543_101144594	4.5
novel_mir4033	326	miRNA	NC_000082.6:+:31898542_31898633	18.8
novel_mir4037	142	miRNA	NC_000083.6:-:46383354_46383417	8.19
novel_mir4040	259	miRNA	NC_000077.6:-:115177814_115177864	14.94
novel_mir4044	49	miRNA	NC_000073.6:+:143460100_143460172	2.83
novel_mir4050	163	miRNA	NC_000073.6:-:121034746_121034792	9.4
novel_mir4053	36	miRNA	NC_000070.6:+:43209581_43209626	2.08
novel_mir4055	31	miRNA	NC_000086.7:-:58038710_58038795	1.79
novel_mir4069	14	miRNA	NC_000074.6:+:95716230_95716296	0.81
novel_mir4079	26	miRNA	NC_000074.6:+:125338385_125338453	1.5
novel_mir4080	169	miRNA	NC_000069.6:+:95659229_95659304	9.75
novel_mir4083	470	miRNA	NC_000081.6:-:81889954_81889997	27.11
novel_mir4086	50	miRNA	NC_000076.6:+:79938763_79938829	2.88
novel_mir4092	552	miRNA	NC_000082.6:-:49575359_49575405	31.83
novel_mir4099	117	miRNA	NC_000076.6:+:117224169_117224256	6.75
novel_mir4103	134	miRNA	NC_000074.6:-:120486696_120486744	7.73
novel_mir4105	34	miRNA	NC_000077.6:+:5521014_5521077	1.96
novel_mir4116	11	miRNA	NC_000080.6:-:99299152_99299221	0.63
novel_mir4124	23	miRNA	NC_000083.6:-:28341060_28341128	1.33
novel_mir4125	30	miRNA	NC_000083.6:+:28375972_28376036	1.73
novel_mir4131	21	miRNA	NC_000067.6:-:134333309_134333374	1.21
novel_mir4133	41	miRNA	NT_039662.3:-:1144496_1144576	2.36
novel_mir4135	46	miRNA	NC_000072.6:-:55117766_55117835	2.65
novel_mir4139	44	miRNA	NC_000069.6:-:153664048_153664140	2.54
novel_mir4144	16	miRNA	NC_000073.6:-:19694860_19694946	0.92
novel_mir4145	14	miRNA	NC_000082.6:+:35184750_35184818	0.81
novel_mir4149	33	miRNA	NC_000079.6:-:63240013_63240056	1.9
novel_mir4150	40	miRNA	NC_000070.6:+:128550290_128550353	2.31
novel_mir4155	32	miRNA	NC_000081.6:+:78899778_78899849	1.85
novel_mir4165	34	miRNA	NC_000086.7:-:37571582_37571637	1.96
novel_mir4168	37	miRNA	NC_000070.6:-:3228698_3228773	2.13
novel_mir4178	77	miRNA	NC_000072.6:+:145265198_145265254	4.44
novel_mir4179	35	miRNA	NC_000076.6:-:41599481_41599541	2.02
novel_mir4183	28	miRNA	NC_000077.6:+:118927340_118927413	1.61
novel_mir4186	19	miRNA	NC_000073.6:-:141276639_141276692	1.1
novel_mir4188	421	miRNA	NC_000076.6:+:41994705_41994765	24.28
novel_mir4191	56	miRNA	NC_000077.6:+:98809858_98809903	3.23
novel_mir4193	63	miRNA	NC_000085.6:+:46056665_46056719	3.63
novel_mir4199	11	miRNA	NC_000070.6:-:101002986_101003050	0.63
novel_mir4214	136	miRNA	NC_000068.7:+:85004398_85004463	7.84
novel_mir4216	147	miRNA	NC_000071.6:+:32146242_32146286	8.48
novel_mir4217	2488	miRNA	NC_000076.6:-:85526995_85527031	143.48
novel_mir4221	70	miRNA	NC_000067.6:-:86504142_86504211	4.04
novel_mir4222	42	miRNA	NC_000067.6:+:183439171_183439238	2.42
novel_mir4226	32	miRNA	NC_000071.6:-:113765809_113765868	1.85
novel_mir4232	19	miRNA	NT_187027.1:-:1998543_1998608	1.1
novel_mir4236	26	miRNA	NC_000085.6:-:47143598_47143683	1.5
novel_mir4246	14	miRNA	NC_000073.6:+:96976036_96976089	0.81
novel_mir4247	18	miRNA	NC_000078.6:-:33215823_33215872	1.04
novel_mir4251	103	miRNA	NC_000073.6:-:30251378_30251416	5.94
novel_mir3557	17	miRNA	NC_000068.7:-:165234440_165234495	0.98
novel_mir4254	86	miRNA	NC_000074.6:-:125941898_125941948	4.96
novel_mir4257	608	miRNA	NC_000072.6:+:91772714_91772780	35.06
novel_mir4265	10	miRNA	NC_000075.6:-:123113143_123113191	0.58
novel_mir4269	71	miRNA	NC_000075.6:+:58284342_58284412	4.09
novel_mir4272	45	miRNA	NC_000077.6:+:116843061_116843117	2.6
novel_mir4275	33	miRNA	NC_000070.6:-:141382944_141383013	1.9
novel_mir4278	17	miRNA	NC_000078.6:-:65172441_65172514	0.98
novel_mir4280	34	miRNA	NC_000074.6:-:94429470_94429543	1.96
novel_mir3912	11	miRNA	NC_000077.6:-:99993713_99993790	0.63
novel_mir4294	10	miRNA	NC_000076.6:+:63661041_63661093	0.58
novel_mir4300	407	miRNA	NC_000080.6:-:59715842_59715883	23.47
novel_mir4304	116	miRNA	NC_000077.6:-:119242420_119242487	6.69
novel_mir4308	30	miRNA	NC_000072.6:-:99799658_99799745	1.73
novel_mir4313	51	miRNA	NC_000067.6:-:87756321_87756390	2.94
novel_mir4318	11	miRNA	NC_000075.6:-:110631770_110631850	0.63
novel_mir4321	25	miRNA	NC_000078.6:+:3781601_3781672	1.44
novel_mir4322	309	miRNA	NC_000072.6:-:120263358_120263415	17.82
novel_mir3607	615	miRNA	NC_000070.6:+:46344271_46344312	35.47
novel_mir4323	233	miRNA	NC_000077.6:-:115232011_115232088	13.44
novel_mir4327	12	miRNA	NC_000072.6:-:88013824_88013909	0.69
novel_mir4329	11	miRNA	NC_000086.7:+:8085577_8085642	0.63
novel_mir4333	27	miRNA	NC_000073.6:-:144470548_144470607	1.56
novel_mir4335	10	miRNA	NC_000082.6:+:29579531_29579609	0.58
novel_mir4336	38	miRNA	NC_000077.6:+:62879559_62879633	2.19
novel_mir4350	55	miRNA	NC_000083.6:-:27193902_27193966	3.17
novel_mir4352	153	miRNA	NC_000080.6:+:50062230_50062300	8.82
novel_mir4359	69	miRNA	NC_000072.6:-:115731083_115731151	3.98
novel_mir4363	29	miRNA	NC_000072.6:+:84103589_84103664	1.67
novel_mir4365	40	miRNA	NC_000073.6:-:24496086_24496157	2.31
novel_mir4368	100	miRNA	NC_000072.6:-:83317421_83317473	5.77
novel_mir4369	15	miRNA	NC_000079.6:+:73732271_73732345	0.87
novel_mir4389	315	miRNA	NC_000068.7:+:163204383_163204451	18.17
novel_mir4390	11	miRNA	NC_000079.6:+:28531766_28531845	0.63
novel_mir4392	13	miRNA	NC_000077.6:-:116581151_116581209	0.75
novel_mir4393	21	miRNA	NC_000079.6:-:19411998_19412060	1.21
novel_mir4398	156	miRNA	NC_000072.6:+:32021044_32021104	9
novel_mir4401	36	miRNA	NC_000077.6:+:114066008_114066055	2.08
novel_mir4407	97	miRNA	NC_000077.6:-:98683040_98683118	5.59
novel_mir4409	11	miRNA	NC_000084.6:+:69425789_69425834	0.63
novel_mir4411	203	miRNA	NC_000071.6:-:31023444_31023483	11.71
novel_mir4412	82	miRNA	NC_000070.6:-:134968939_134968999	4.73
novel_mir4413	49	miRNA	NC_000077.6:+:62050751_62050827	2.83
novel_mir4428	23	miRNA	NC_000073.6:+:66294028_66294110	1.33
novel_mir4430	50	miRNA	NC_000069.6:+:87930427_87930477	2.88
novel_mir4431	10	miRNA	NC_000071.6:+:123037325_123037382	0.58
novel_mir4432	33	miRNA	NC_000077.6:-:5389973_5390033	1.9
novel_mir4435	26	miRNA	NC_000077.6:-:115590637_115590707	1.5
novel_mir4441	394	miRNA	NC_000068.7:-:165630118_165630197	22.72
novel_mir4449	70	miRNA	NC_000076.6:-:81378538_81378585	4.04
novel_mir4450	18	miRNA	NC_000075.6:+:100624856_100624945	1.04
novel_mir4451	247	miRNA	NC_000079.6:+:94576521_94576563	14.24
novel_mir4452	60	miRNA	NC_000069.6:+:102238674_102238745	3.46
novel_mir4459	38	miRNA	NC_000071.6:+:137735582_137735668	2.19
novel_mir4462	19	miRNA	NW_004058054.1:+:140653_140738	1.1
novel_mir4463	134	miRNA	NC_000068.7:+:178608670_178608754	7.73
novel_mir4468	18	miRNA	NC_000067.6:-:36055236_36055323	1.04
novel_mir4469	42	miRNA	NC_000078.6:+:13768593_13768656	2.42
novel_mir4473	1779	miRNA	NC_000077.6:+:75594573_75594610	102.6
novel_mir4479	52	miRNA	NC_000074.6:+:99004302_99004363	3
novel_mir4481	36	miRNA	NC_000085.6:-:7232560_7232602	2.08
novel_mir4484	30	miRNA	NC_000083.6:+:31631547_31631600	1.73
novel_mir4485	11	miRNA	NC_000075.6:+:38052246_38052319	0.63
novel_mir4488	38	miRNA	NT_039634.4:+:1339413_1339477	2.19
novel_mir4491	62	miRNA	NC_000073.6:+:45456489_45456533	3.58
novel_mir4501	43	miRNA	NC_000071.6:-:35953481_35953529	2.48
novel_mir4511	48	miRNA	NC_000080.6:+:62290612_62290687	2.77
novel_mir4515	30	miRNA	NC_000079.6:+:93772186_93772251	1.73
novel_mir4520	16	miRNA	NC_000069.6:-:131081070_131081155	0.92
novel_mir4525	36	miRNA	NC_000075.6:-:57272045_57272115	2.08
novel_mir4533	27	miRNA	NC_000071.6:-:118078776_118078839	1.56
novel_mir4542	1029	miRNA	NC_000077.6:+:62519123_62519169	59.34
novel_mir4544	13	miRNA	NC_000073.6:+:139607230_139607287	0.75
novel_mir4545	14	miRNA	NC_000072.6:-:47889753_47889809	0.81
novel_mir4546	87	miRNA	NC_000071.6:+:139816642_139816687	5.02
novel_mir4550	90	miRNA	NC_000082.6:-:22463907_22463980	5.19
novel_mir4556	16	miRNA	NC_000069.6:+:85709566_85709653	0.92
novel_mir4579	24	miRNA	NC_000072.6:-:90836316_90836403	1.38
novel_mir4581	16	miRNA	NC_000076.6:-:60324867_60324915	0.92
novel_mir4587	38	miRNA	NC_000085.6:-:54045659_54045701	2.19
novel_mir4591	37	miRNA	NC_000073.6:-:121919322_121919363	2.13
novel_mir4592	17	miRNA	NC_000074.6:+:107537017_107537086	0.98
novel_mir4596	219	miRNA	NC_000068.7:-:160367245_160367328	12.63
novel_mir4601	22	miRNA	NC_000075.6:+:59972090_59972180	1.27
novel_mir4612	79	miRNA	NW_004058054.1:+:83386_83446	4.56
novel_mir4622	21	miRNA	NC_000076.6:+:18231935_18231996	1.21
novel_mir4626	26	miRNA	NC_000071.6:-:128359757_128359813	1.5
novel_mir4634	13	miRNA	NC_000078.6:+:110199336_110199408	0.75
novel_mir4639	13	miRNA	NC_000078.6:-:85296646_85296724	0.75
novel_mir4643	14	miRNA	NC_000086.7:-:38456339_38456387	0.81
novel_mir4649	27	miRNA	NC_000073.6:-:134296959_134297027	1.56
novel_mir4658	18	miRNA	NC_000079.6:+:72120743_72120812	1.04
novel_mir4661	40	miRNA	NC_000071.6:+:99375086_99375131	2.31
novel_mir4663	116	miRNA	NC_000068.7:-:167619704_167619778	6.69
novel_mir4668	18	miRNA	NC_000073.6:+:137258859_137258918	1.04
novel_mir4669	27	miRNA	NC_000067.6:-:68420054_68420123	1.56
novel_mir4673	44	miRNA	NC_000079.6:-:40482903_40482967	2.54
novel_mir4226	14	miRNA	NC_000071.6:-:113765751_113765829	0.81
novel_mir4676	51	miRNA	NC_000072.6:+:17806751_17806824	2.94
novel_mir4684	16	miRNA	NC_000075.6:+:8017716_8017774	0.92
novel_mir4685	814	miRNA	NC_000075.6:-:22083072_22083135	46.94
novel_mir4687	37	miRNA	NC_000072.6:-:25233812_25233870	2.13
novel_mir4690	35	miRNA	NC_000068.7:+:152082522_152082570	2.02
novel_mir4703	21	miRNA	NC_000075.6:+:64258458_64258538	1.21
novel_mir4705	12	miRNA	NC_000069.6:+:41563777_41563836	0.69
novel_mir4707	31	miRNA	NC_000068.7:+:180118918_180118972	1.79
novel_mir4716	50	miRNA	NC_000068.7:+:32904961_32905025	2.88
novel_mir4718	517	miRNA	NC_000080.6:-:76424881_76424937	29.82
novel_mir4719	10	miRNA	NC_000084.6:+:88972119_88972177	0.58
novel_mir4725	38	miRNA	NC_000071.6:+:76856268_76856332	2.19
novel_mir4733	86	miRNA	NC_000084.6:-:21300610_21300668	4.96
novel_mir4737	66	miRNA	NC_000077.6:+:4867505_4867586	3.81
novel_mir4744	103	miRNA	NC_000068.7:-:69860800_69860878	5.94
novel_mir4746	11	miRNA	NC_000070.6:+:139442771_139442859	0.63
novel_mir4776	32	miRNA	NC_000068.7:+:32305907_32305969	1.85
novel_mir4777	11	miRNA	NC_000076.6:-:18224537_18224582	0.63
novel_mir4792	213	miRNA	NC_000079.6:+:99569285_99569342	12.28
novel_mir4800	112	miRNA	NC_000073.6:-:45644323_45644397	6.46
novel_mir4802	49	miRNA	NC_000068.7:-:181313735_181313791	2.83
novel_mir4808	70	miRNA	NC_000076.6:-:88201323_88201400	4.04
novel_mir4809	16	miRNA	NC_000077.6:+:113174686_113174748	0.92
novel_mir4813	33	miRNA	NC_000071.6:-:63925196_63925251	1.9
novel_mir4822	48	miRNA	NC_000068.7:+:168749187_168749246	2.77
novel_mir4823	21	miRNA	NC_000084.6:+:7003431_7003470	1.21
novel_mir4689	17	miRNA	NC_000071.6:+:143563110_143563163	0.98
novel_mir4851	16	miRNA	NC_000075.6:-:90163871_90163914	0.92
novel_mir4854	85	miRNA	NC_000072.6:+:84099548_84099611	4.9
novel_mir4859	26	miRNA	NC_000073.6:+:117488766_117488855	1.5
novel_mir4868	11	miRNA	NC_000076.6:+:71987219_71987294	0.63
novel_mir4874	5208	miRNA	NC_000071.6:+:137485910_137485996	300.35
novel_mir4882	11	miRNA	NC_000067.6:-:59573593_59573675	0.63
novel_mir4889	25	miRNA	NC_000081.6:-:84602608_84602651	1.44
novel_mir4897	37	miRNA	NC_000068.7:+:151925303_151925356	2.13
novel_mir4912	34	miRNA	NC_000082.6:+:5784581_5784652	1.96
novel_mir4917	25	miRNA	NC_000081.6:+:65930579_65930653	1.44
novel_mir4920	17	miRNA	NC_000068.7:-:172509164_172509211	0.98
novel_mir4926	161	miRNA	NC_000067.6:+:125509225_125509306	9.28
novel_mir4935	10	miRNA	NT_187025.1:-:37062_37139	0.58
novel_mir4945	34	miRNA	NC_000084.6:+:60807942_60808017	1.96
novel_mir4950	252	miRNA	NC_000084.6:+:80329606_80329667	14.53
novel_mir4951	85	miRNA	NC_000083.6:-:15807221_15807269	4.9
novel_mir4956	12	miRNA	NC_000085.6:+:5110088_5110153	0.69
novel_mir4963	48	miRNA	NC_000067.6:-:191008541_191008590	2.77
novel_mir4964	45	miRNA	NC_000077.6:+:54027678_54027726	2.6
novel_mir4966	16	miRNA	NC_000073.6:+:81075904_81075986	0.92
novel_mir4974	14	miRNA	NC_000076.6:+:71245648_71245739	0.81
novel_mir4982	67	miRNA	NC_000072.6:-:11038031_11038092	3.86
novel_mir4987	11	miRNA	NC_000070.6:-:108100470_108100526	0.63
novel_mir4992	27	miRNA	NC_000074.6:+:120300810_120300892	1.56
novel_mir4993	54	miRNA	NC_000070.6:-:97642852_97642928	3.11
novel_mir4994	605	miRNA	NC_000086.7:+:20662930_20663002	34.89
novel_mir4996	257	miRNA	NC_000069.6:+:51487419_51487483	14.82
novel_mir4998	14	miRNA	NC_000068.7:+:74676146_74676207	0.81
novel_mir5006	45	miRNA	NC_000067.6:+:120270461_120270501	2.6
novel_mir5009	15	miRNA	NC_000074.6:-:119471928_119471975	0.87
novel_mir5026	38	miRNA	NC_000072.6:+:54372590_54372679	2.19
novel_mir5043	24	miRNA	NC_000072.6:-:38327698_38327750	1.38
novel_mir5056	14	miRNA	NC_000067.6:-:184471518_184471562	0.81
novel_mir5063	32	miRNA	NC_000074.6:+:94386533_94386592	1.85
novel_mir5065	25	miRNA	NC_000068.7:-:30800578_30800653	1.44
novel_mir5070	27	miRNA	NC_000081.6:+:78559672_78559733	1.56
novel_mir5072	12	miRNA	NC_000077.6:+:102408758_102408805	0.69
novel_mir5076	155	miRNA	NC_000074.6:+:43722546_43722612	8.94
novel_mir5090	94	miRNA	NC_000083.6:-:27020293_27020339	5.42
novel_mir5104	21	miRNA	NC_000080.6:-:25471405_25471493	1.21
novel_mir5108	54	miRNA	NC_000070.6:-:43539127_43539175	3.11
novel_mir5117	55	miRNA	NC_000077.6:-:115849753_115849818	3.17
novel_mir5119	441	miRNA	NC_000081.6:+:86632196_86632246	25.43
novel_mir5123	545	miRNA	NC_000073.6:-:45317071_45317125	31.43
novel_mir5128	13	miRNA	NC_000082.6:-:70109750_70109816	0.75
novel_mir5131	186	miRNA	NC_000077.6:-:117028599_117028652	10.73
novel_mir50	19	miRNA	NC_000075.6:+:44553898_44554003	1.1
novel_mir5137	63	miRNA	NC_000070.6:-:129134963_129135013	3.63
novel_mir5142	128	miRNA	NC_000085.6:-:7151411_7151496	7.38
novel_mir5145	115	miRNA	NC_000077.6:+:86447922_86447967	6.63
novel_mir5154	257	miRNA	NC_000068.7:+:157940517_157940584	14.82
novel_mir5157	52	miRNA	NC_000068.7:+:159471836_159471896	3
novel_mir5166	14	miRNA	NC_000068.7:-:180660414_180660485	0.81
novel_mir5173	18	miRNA	NC_000069.6:-:153563703_153563769	1.04
novel_mir5180	21	miRNA	NC_000079.6:+:24714631_24714718	1.21
novel_mir5181	29	miRNA	NC_000073.6:+:75873305_75873371	1.67
novel_mir5194	27	miRNA	NC_000081.6:+:57777143_57777219	1.56
novel_mir5197	220	miRNA	NC_000070.6:+:149462666_149462743	12.69
novel_mir5205	56	miRNA	NC_000071.6:+:52047284_52047329	3.23
novel_mir5220	13	miRNA	NC_000071.6:+:23936588_23936637	0.75
novel_mir5223	99	miRNA	NC_000075.6:-:78193916_78193974	5.71
novel_mir5233	97	miRNA	NC_000083.6:+:26114911_26114982	5.59
novel_mir5237	19	miRNA	NT_039382.4:+:395467_395551	1.1
novel_mir5257	324	miRNA	NC_000070.6:+:156217299_156217370	18.69
novel_mir5259	45	miRNA	NC_000068.7:+:101772192_101772267	2.6
novel_mir5262	13	miRNA	NC_000068.7:-:163371084_163371159	0.75
novel_mir5272	11	miRNA	NC_000080.6:-:77673148_77673214	0.63
novel_mir5273	63	miRNA	NC_000079.6:-:21250229_21250303	3.63
novel_mir5275	16	miRNA	NC_000077.6:+:24388229_24388311	0.92
novel_mir5280	17	miRNA	NC_000078.6:+:74292657_74292699	0.98
novel_mir5283	77	miRNA	NC_000081.6:-:78770309_78770386	4.44
novel_mir5296	330	miRNA	NC_000081.6:-:58018674_58018745	19.03
novel_mir5298	41	miRNA	NC_000067.6:+:91345016_91345100	2.36
novel_mir5300	54	miRNA	NC_000086.7:-:146069176_146069258	3.11
novel_mir5319	114	miRNA	NC_000067.6:+:72297913_72297968	6.57
novel_mir5328	16	miRNA	NC_000077.6:+:69651022_69651078	0.92
novel_mir5332	44	miRNA	NC_000072.6:+:91141099_91141167	2.54
novel_mir5342	53	miRNA	NC_000077.6:+:59344745_59344789	3.06
novel_mir5354	30	miRNA	NC_000073.6:-:25230876_25230942	1.73
novel_mir5355	11	miRNA	NC_000068.7:-:104739248_104739325	0.63
novel_mir5357	115	miRNA	NC_000074.6:-:72461881_72461952	6.63
novel_mir5377	24	miRNA	NC_000068.7:+:36231085_36231160	1.38
novel_mir5379	143	miRNA	NC_000068.7:-:105517378_105517429	8.25
novel_mir5386	1115	miRNA	NC_000068.7:-:76078840_76078923	64.3
novel_mir5391	486	miRNA	NC_000079.6:+:57990790_57990855	28.03
novel_mir5395	65	miRNA	NC_000075.6:-:37351594_37351669	3.75
novel_mir5401	29	miRNA	NC_000082.6:-:57755361_57755420	1.67
novel_mir5402	12	miRNA	NC_000068.7:+:27949760_27949818	0.69
novel_mir5404	198	miRNA	NC_000068.7:+:164982840_164982917	11.42
novel_mir5412	13	miRNA	NC_000080.6:+:33678902_33678949	0.75
novel_mir5422	309	miRNA	NC_000073.6:-:101438861_101438931	17.82
novel_mir5424	36	miRNA	NC_000083.6:+:25947765_25947848	2.08
novel_mir5433	68	miRNA	NC_000071.6:-:35179258_35179333	3.92
novel_mir5436	60	miRNA	NC_000068.7:-:163480528_163480566	3.46
novel_mir5441	23	miRNA	NC_000075.6:+:14203430_14203506	1.33
novel_mir5447	39	miRNA	NC_000086.7:-:139684805_139684846	2.25
novel_mir5466	20	miRNA	NC_000081.6:-:38078598_38078675	1.15
novel_mir5469	35	miRNA	NC_000081.6:-:64832530_64832568	2.02
novel_mir5485	315	miRNA	NC_000084.6:-:76174894_76174980	18.17
novel_mir5491	53	miRNA	NC_000070.6:-:143108305_143108357	3.06
novel_mir5492	16	miRNA	NC_000077.6:-:114779344_114779398	0.92
novel_mir5494	41	miRNA	NC_000069.6:+:103171752_103171792	2.36
novel_mir5503	65	miRNA	NC_000077.6:-:75444354_75444436	3.75
novel_mir5519	810	miRNA	NC_000081.6:-:64156765_64156829	46.71
novel_mir5521	18	miRNA	NC_000077.6:+:100347944_100348026	1.04
novel_mir5522	30	miRNA	NC_000084.6:-:75448122_75448175	1.73
novel_mir5538	15	miRNA	NC_000071.6:+:33018832_33018916	0.87
novel_mir5541	34	miRNA	NC_000071.6:-:113847270_113847323	1.96
novel_mir5542	272	miRNA	NC_000071.6:-:146955354_146955430	15.69
novel_mir5544	10	miRNA	NC_000076.6:-:85034327_85034387	0.58
novel_mir5545	26	miRNA	NC_000078.6:+:100425335_100425401	1.5
novel_mir5553	21	miRNA	NC_000081.6:+:37138152_37138224	1.21
novel_mir5555	37	miRNA	NC_000070.6:-:134209575_134209620	2.13
novel_mir5557	15	miRNA	NC_000071.6:+:35538236_35538310	0.87
novel_mir5558	575	miRNA	NC_000077.6:-:119182850_119182906	33.16
novel_mir5561	75	miRNA	NC_000069.6:-:96268694_96268751	4.33
novel_mir5572	240	miRNA	NC_000079.6:-:43908577_43908645	13.84
novel_mir5575	22	miRNA	NC_000073.6:+:83865664_83865739	1.27
novel_mir5576	31	miRNA	NC_000072.6:+:6117508_6117550	1.79
novel_mir5579	470	miRNA	NC_000073.6:+:81120522_81120565	27.11
novel_mir5582	11	miRNA	NC_000073.6:-:64461978_64462042	0.63
novel_mir5583	20	miRNA	NC_000070.6:+:63018847_63018926	1.15
novel_mir5588	127	miRNA	NC_000077.6:-:98389760_98389830	7.32
novel_mir5596	16	miRNA	NC_000071.6:-:124162063_124162144	0.92
novel_mir5597	51	miRNA	NC_000077.6:-:83727405_83727468	2.94
novel_mir5599	85	miRNA	NC_000068.7:+:26515660_26515720	4.9
novel_mir5609	36	miRNA	NC_000077.6:+:32284207_32284278	2.08
novel_mir5620	11	miRNA	NC_000077.6:-:68648491_68648568	0.63
novel_mir5630	54	miRNA	NC_000077.6:-:115264361_115264439	3.11
novel_mir5640	10	miRNA	NC_000076.6:+:41621756_41621840	0.58
novel_mir5645	21	miRNA	NC_000072.6:-:145004290_145004353	1.21
novel_mir5646	93	miRNA	NC_000072.6:+:113898569_113898615	5.36
novel_mir5651	141	miRNA	NC_000079.6:+:41478043_41478128	8.13
novel_mir5654	126	miRNA	NC_000075.6:-:58110501_58110589	7.27
novel_mir5666	191	miRNA	NC_000071.6:-:35619812_35619860	11.02
novel_mir5672	17	miRNA	NC_000085.6:-:25178276_25178341	0.98
novel_mir5674	29	miRNA	NC_000081.6:-:101045220_101045264	1.67
novel_mir5681	16	miRNA	NC_000071.6:-:125098438_125098490	0.92
novel_mir5690	18	miRNA	NC_000074.6:-:84977793_84977850	1.04
novel_mir16	19	miRNA	NC_000069.6:+:139420139_139420218	1.1
novel_mir5698	89	miRNA	NC_000072.6:-:113969582_113969640	5.13
novel_mir5702	76	miRNA	NC_000073.6:+:19352317_19352389	4.38
novel_mir5705	138	miRNA	NC_000083.6:+:15759687_15759778	7.96
novel_mir5716	45	miRNA	NC_000073.6:-:96889942_96890008	2.6
novel_mir5721	68	miRNA	NC_000067.6:+:182778734_182778809	3.92
novel_mir3884	42	miRNA	NC_000073.6:-:48137638_48137709	2.42
novel_mir5741	24	miRNA	NC_000076.6:-:81513248_81513323	1.38
novel_mir5743	61	miRNA	NC_000074.6:+:123761657_123761738	3.52
novel_mir5752	171	miRNA	NC_000073.6:+:12925683_12925737	9.86
novel_mir5754	32	miRNA	NC_000081.6:-:75722721_75722785	1.85
novel_mir5762	578	miRNA	NC_000077.6:-:116116754_116116841	33.33
novel_mir5765	18	miRNA	NC_000069.6:+:88419810_88419864	1.04
novel_mir5768	15	miRNA	NC_000070.6:-:154570552_154570605	0.87
novel_mir5778	10	miRNA	NC_000075.6:+:110946846_110946914	0.58
novel_mir5780	85	miRNA	NC_000080.6:+:54920183_54920244	4.9
novel_mir5783	28	miRNA	NC_000075.6:-:84810185_84810240	1.61
novel_mir5786	13	miRNA	NC_000071.6:+:51591770_51591832	0.75
novel_mir5789	74	miRNA	NC_000071.6:-:134241687_134241763	4.27
novel_mir5792	23	miRNA	NC_000082.6:+:31507003_31507069	1.33
novel_mir5793	118	miRNA	NC_000079.6:+:29265737_29265793	6.81
novel_mir5325	15	miRNA	NC_000084.6:-:37962666_37962733	0.87
novel_mir5796	20	miRNA	NC_000080.6:-:64519700_64519760	1.15
novel_mir5797	74	miRNA	NC_000074.6:+:122231386_122231458	4.27
novel_mir5799	2939	miRNA	NC_000077.6:-:69063548_69063586	169.49
novel_mir5800	16	miRNA	NC_000072.6:-:147016236_147016291	0.92
novel_mir5803	1352	miRNA	NC_000068.7:-:92123589_92123671	77.97
novel_mir5807	1035	miRNA	NC_000078.6:+:73085117_73085203	59.69
novel_mir5816	111	miRNA	NC_000079.6:-:103681637_103681672	6.4
novel_mir5817	11	miRNA	NC_000070.6:+:45342866_45342915	0.63
novel_mir5820	19	miRNA	NC_000080.6:-:64633439_64633497	1.1
novel_mir5821	90	miRNA	NC_000071.6:+:130152727_130152786	5.19
novel_mir5822	33	miRNA	NC_000071.6:+:116214441_116214520	1.9
novel_mir5827	217	miRNA	NT_187027.1:+:2238810_2238858	12.51
novel_mir5614	1903	miRNA	NC_000081.6:+:89370419_89370460	109.75
novel_mir5850	48	miRNA	NC_000071.6:+:114009819_114009864	2.77
novel_mir5854	13	miRNA	NC_000073.6:+:112212779_112212831	0.75
novel_mir5856	31	miRNA	NC_000083.6:-:8599652_8599715	1.79
novel_mir5858	109	miRNA	NC_000081.6:-:74006861_74006929	6.29
novel_mir5862	14	miRNA	NC_000073.6:+:64374072_64374139	0.81
novel_mir5882	54	miRNA	NC_000076.6:+:19892211_19892257	3.11
novel_mir5888	78	miRNA	NC_000068.7:-:132053175_132053221	4.5
novel_mir5901	79	miRNA	NC_000079.6:+:59348196_59348284	4.56
novel_mir5907	79	miRNA	NC_000067.6:-:92641696_92641736	4.56
novel_mir5917	19	miRNA	NC_000072.6:-:125082021_125082095	1.1
novel_mir5927	24	miRNA	NC_000086.7:-:48450088_48450147	1.38
novel_mir5928	241	miRNA	NC_000081.6:+:76351326_76351405	13.9
novel_mir5939	46	miRNA	NC_000069.6:-:145164385_145164449	2.65
novel_mir5952	48	miRNA	NC_000073.6:+:45145966_45146041	2.77
novel_mir5956	67	miRNA	NC_000081.6:+:32082394_32082460	3.86
novel_mir5968	10	miRNA	NC_000072.6:+:72166716_72166794	0.58
novel_mir4803	13	miRNA	NC_000071.6:-:30116541_30116632	0.75
novel_mir5979	15	miRNA	NC_000075.6:-:110362462_110362500	0.87
novel_mir5980	41	miRNA	NC_000069.6:-:97525805_97525847	2.36
novel_mir5992	73	miRNA	NC_000076.6:+:81136795_81136853	4.21
novel_mir5994	12	miRNA	NC_000078.6:-:8466807_8466873	0.69
novel_mir5997	16	miRNA	NC_000072.6:-:98510231_98510286	0.92
novel_mir5999	14	miRNA	NC_000080.6:+:69693431_69693487	0.81
novel_mir6000	33	miRNA	NC_000081.6:+:32631367_32631441	1.9
novel_mir6001	13	miRNA	NC_000070.6:-:46800780_46800841	0.75
novel_mir6004	121	miRNA	NC_000080.6:-:117818587_117818640	6.98
novel_mir6006	31	miRNA	NC_000083.6:+:46590109_46590175	1.79
novel_mir6008	34	miRNA	NC_000080.6:+:55526880_55526936	1.96
novel_mir6012	14	miRNA	NC_000077.6:+:119019162_119019223	0.81
novel_mir6013	47	miRNA	NC_000076.6:-:79951614_79951657	2.71
novel_mir6020	11	miRNA	NC_000071.6:-:112230357_112230438	0.63
novel_mir6021	42	miRNA	NC_000071.6:+:136171935_136171991	2.42
novel_mir6029	944	miRNA	NC_000067.6:+:101386469_101386513	54.44
novel_mir4075	15	miRNA	NC_000083.6:+:46680967_46681028	0.87
novel_mir6037	28	miRNA	NC_000085.6:+:5239345_5239415	1.61
novel_mir6045	190	miRNA	NC_000068.7:+:31254808_31254856	10.96
novel_mir6046	123	miRNA	NC_000080.6:+:92920734_92920821	7.09
novel_mir6054	72	miRNA	NC_000078.6:+:27303465_27303528	4.15
novel_mir6074	57	miRNA	NC_000070.6:-:33854360_33854403	3.29
novel_mir6076	12	miRNA	NC_000084.6:+:60204034_60204087	0.69
novel_mir6077	22	miRNA	NC_000077.6:-:118361939_118361981	1.27
novel_mir6080	21	miRNA	NC_000083.6:-:32335822_32335886	1.21
novel_mir6088	21	miRNA	NC_000070.6:+:132748183_132748251	1.21
novel_mir6098	407	miRNA	NC_000067.6:-:75487185_75487254	23.47
novel_mir6099	46	miRNA	NC_000078.6:-:69220659_69220736	2.65
novel_mir6100	158	miRNA	NC_000071.6:-:24501358_24501404	9.11
novel_mir6106	57	miRNA	NC_000073.6:+:101739763_101739811	3.29
novel_mir6109	21	miRNA	NC_000078.6:-:90228038_90228128	1.21
novel_mir6115	101	miRNA	NC_000077.6:-:78415325_78415397	5.82
novel_mir6119	79	miRNA	NC_000084.6:-:61683055_61683117	4.56
novel_mir6127	25	miRNA	NC_000069.6:+:145461405_145461467	1.44
novel_mir6132	164	miRNA	NC_000085.6:-:40562990_40563053	9.46
novel_mir6134	12	miRNA	NC_000070.6:-:139784420_139784505	0.69
novel_mir6135	23	miRNA	NC_000072.6:-:41629424_41629518	1.33
novel_mir6139	21	miRNA	NC_000068.7:-:32377996_32378075	1.21
novel_mir6147	265	miRNA	NC_000077.6:-:43585409_43585471	15.28
novel_mir6151	48	miRNA	NC_000073.6:-:40899992_40900040	2.77

## Sheet: Noni fruit juice group
sRNA id	Count(28219382)	Type	Description	TPM
mmu-miR-1843a-5p	1	mature	mir-1843	0.04
mmu-miR-378a-3p	5072	mature	mir-378	179.73
mmu-miR-130a-3p	384	mature	mir-130	13.61
mmu-miR-17-5p	45	mature	mir-17	1.59
mmu-miR-5620-5p	76	mature	undef	2.69
mmu-miR-28a-3p	37	mature	mir-28	1.31
mmu-miR-485-5p	49	mature	mir-485	1.74
mmu-miR-215-5p	87	mature	mir-192	3.08
mmu-miR-375-3p	9137	mature	mir-375	323.78
mmu-miR-379-5p	1	mature	mir-379	0.04
mmu-miR-6967-3p	65	mature	mir-6967	2.3
mmu-miR-9b-3p	164	mature	undef	5.81
mmu-miR-199a-3p,mmu-miR-199b-3p	2	mature	mir-199	0.07
mmu-let-7f-5p	9221	mature	let-7	326.76
mmu-miR-350-3p	2	mature	mir-350	0.07
mmu-miR-542-5p	222	mature	mir-542	7.87
mmu-miR-429-3p	169	mature	mir-8	5.99
mmu-miR-10b-5p	253	mature	mir-10	8.97
mmu-miR-484	1912	mature	mir-484	67.75
mmu-miR-224-5p	132	mature	mir-224	4.68
mmu-miR-9-3p	1	mature	mir-9	0.04
mmu-miR-184-3p	4	mature	mir-184	0.14
mmu-miR-470-5p	15	mature	mir-743	0.53
mmu-miR-20a-5p	32	mature	mir-17	1.13
mmu-miR-8116	1	mature	undef	0.04
mmu-miR-1839-5p	201	mature	mir-1839	7.12
mmu-miR-672-3p	1	mature	mir-672	0.04
mmu-miR-449a-5p	266	mature	mir-449	9.43
mmu-miR-378b	354	mature	mir-378	12.54
mmu-miR-139-3p	1	mature	mir-139	0.04
mmu-miR-215-3p	1	mature	mir-192	0.04
mmu-miR-34a-5p	145	mature	mir-34	5.14
mmu-miR-1a-3p	6	mature	mir-1	0.21
mmu-miR-211-5p	4	mature	mir-204	0.14
mmu-miR-93-5p	1313	mature	mir-17	46.53
mmu-miR-339-3p	1	mature	mir-339	0.04
mmu-miR-151-3p	360	mature	mir-28	12.76
mmu-miR-183-5p	1	mature	mir-183	0.04
mmu-miR-1247-5p	48	mature	mir-1247	1.7
mmu-miR-301a-3p	55	mature	mir-130	1.95
mmu-miR-486a-3p	395	mature	mir-486	14
mmu-miR-5114	144	mature	undef	5.1
mmu-miR-369-3p	89	mature	mir-154	3.15
mmu-miR-335-5p	48	mature	mir-335	1.7
mmu-miR-425-5p	73	mature	mir-425	2.59
mmu-miR-127-3p	258	mature	mir-127	9.14
mmu-let-7d-3p	2250	mature	let-7	79.73
mmu-miR-7232-3p	1	mature	undef	0.04
mmu-miR-30b-5p	189	mature	mir-30	6.7
mmu-miR-28a-5p	237	mature	mir-28	8.4
mmu-miR-141-3p	81	mature	mir-8	2.87
mmu-miR-21a-5p	8516	mature	mir-21	301.78
mmu-let-7d-5p	3200	mature	let-7	113.4
mmu-miR-23b-3p	4	mature	mir-23	0.14
mmu-miR-98-5p	273	mature	let-7	9.67
mmu-miR-411-5p	69	mature	mir-379	2.45
mmu-miR-124-3p	141	mature	mir-124	5
mmu-miR-466i-5p	281	mature	mir-467	9.96
mmu-miR-92b-3p	978	mature	mir-25	34.66
mmu-let-7i-5p	21859	mature	let-7	774.61
mmu-miR-27a-3p	18271	mature	mir-27	647.46
mmu-miR-181c-5p	80	mature	mir-181	2.83
mmu-miR-22-3p	19689	mature	mir-22	697.71
mmu-miR-212-3p	92	mature	mir-132	3.26
mmu-miR-451a	33134	mature	mir-451	1174.16
mmu-miR-206-3p	473	mature	mir-1	16.76
mmu-miR-182-5p	111	mature	mir-182	3.93
mmu-miR-871-5p	5	mature	mir-743	0.18
mmu-miR-338-5p	1	mature	mir-338	0.04
mmu-miR-363-3p	79	mature	mir-363	2.8
mmu-miR-154-5p	753	mature	mir-154	26.68
mmu-miR-7a-5p	476	mature	mir-7	16.87
mmu-miR-877-3p	58	mature	mir-877	2.06
mmu-miR-181a-2-3p	2	mature	mir-181	0.07
mmu-miR-300-3p	1	mature	mir-154	0.04
mmu-miR-99a-5p	1810	mature	mir-10	64.14
mmu-miR-323-5p	1	mature	mir-154	0.04
mmu-miR-144-5p	1	mature	mir-144	0.04
mmu-miR-450a-5p	1	mature	mir-450	0.04
mmu-miR-145a-3p	1	mature	mir-145	0.04
mmu-miR-434-3p	113	mature	mir-434	4
mmu-miR-1843b-3p	67	mature	mir-1843	2.37
mmu-miR-140-5p	207	mature	mir-140	7.34
mmu-miR-3074-2-3p	133	mature	mir-3074	4.71
mmu-let-7f-2-3p	120	mature	let-7	4.25
mmu-miR-200b-3p	1	mature	mir-8	0.04
mmu-miR-423-5p	639	mature	mir-423	22.64
mmu-miR-1191a	107	mature	undef	3.79
mmu-miR-30d-5p	1505	mature	mir-30	53.33
mmu-miR-320-3p	768	mature	mir-320	27.22
mmu-miR-223-3p	243	mature	mir-223	8.61
mmu-miR-34b-3p	143	mature	mir-34	5.07
mmu-let-7a-1-3p,mmu-let-7c-2-3p	207	mature	let-7	7.34
mmu-miR-196b-5p	741	mature	mir-196	26.26
mmu-miR-187-3p	75	mature	mir-187	2.66
mmu-let-7e-3p	290	mature	let-7	10.28
mmu-miR-130b-5p	1	mature	mir-130	0.04
mmu-miR-3572-3p	54	mature	mir-3572	1.91
mmu-miR-138-5p	2	mature	mir-138	0.07
mmu-miR-381-3p	1	mature	mir-154	0.04
mmu-miR-193b-3p	125	mature	mir-193	4.43
mmu-miR-181a-1-3p	1	mature	mir-181	0.04
mmu-miR-139-5p	3439	mature	mir-139	121.87
mmu-miR-669l-5p	1	mature	mir-467	0.04
mmu-miR-125b-5p	63	mature	mir-10	2.23
mmu-miR-1964-3p	104	mature	undef	3.69
mmu-miR-191-3p	50	mature	mir-191	1.77
mmu-miR-467e-5p	1	mature	mir-467	0.04
mmu-miR-26a-5p	3695	mature	mir-26	130.94
mmu-miR-16-5p	7794	mature	mir-15	276.19
mmu-miR-3470a	1	mature	mir-3470	0.04
mmu-miR-218-5p	19	mature	mir-218	0.67
mmu-miR-370-5p	1	mature	mir-370	0.04
mmu-miR-143-3p	658	mature	mir-143	23.32
mmu-miR-185-5p	508	mature	mir-185	18
mmu-miR-15b-5p	489	mature	mir-15	17.33
mmu-miR-138-2-3p	1	mature	mir-138	0.04
mmu-miR-615-3p	104	mature	mir-615	3.69
mmu-miR-370-3p	1	mature	mir-370	0.04
mmu-miR-423-3p	3326	mature	mir-423	117.86
mmu-miR-194-5p	117	mature	mir-194	4.15
mmu-miR-152-3p	41	mature	mir-148	1.45
mmu-miR-501-3p	83	mature	mir-500	2.94
mmu-miR-181b-5p	1	mature	mir-181	0.04
mmu-miR-8112	921	mature	undef	32.64
mmu-miR-142a-3p	60	mature	mir-142	2.13
mmu-miR-140-3p	90	mature	mir-140	3.19
mmu-miR-26b-5p	215	mature	mir-26	7.62
mmu-miR-7075-3p	3	mature	undef	0.11
mmu-miR-99b-5p	908	mature	mir-10	32.18
mmu-miR-361-5p	24	mature	mir-361	0.85
mmu-miR-186-5p	1	mature	mir-186	0.04
mmu-miR-322-5p	211	mature	mir-322	7.48
mmu-miR-5126	794	mature	undef	28.14
mmu-miR-6961-5p	116	mature	undef	4.11
mmu-miR-471-3p	2	mature	mir-471	0.07
mmu-miR-328-3p	11118	mature	mir-328	393.98
mmu-miR-467c-5p	71	mature	mir-467	2.52
mmu-miR-384-5p	8	mature	mir-384	0.28
mmu-miR-652-3p	4999	mature	mir-652	177.15
mmu-miR-126a-3p	567	mature	mir-126	20.09
mmu-let-7f-1-3p	1	mature	let-7	0.04
mmu-let-7a-5p	15229	mature	let-7	539.66
mmu-miR-202-5p	4	mature	mir-202	0.14
mmu-miR-322-3p	83	mature	mir-322	2.94
mmu-miR-872-5p	878	mature	mir-872	31.11
mmu-miR-500-3p	1	mature	mir-500	0.04
mmu-let-7e-5p	1	mature	let-7	0.04
mmu-miR-425-3p	264	mature	mir-425	9.36
mmu-miR-709	56	mature	undef	1.98
mmu-miR-326-3p	344	mature	mir-326	12.19
mmu-miR-93-3p	55	mature	mir-17	1.95
mmu-miR-204-5p	477	mature	mir-204	16.9
mmu-miR-503-3p	75	mature	mir-503	2.66
mmu-miR-486b-3p	726	mature	mir-486	25.73
mmu-miR-574-3p	579	mature	mir-574	20.52
mmu-miR-1895	84	mature	undef	2.98
mmu-miR-151-5p	412	mature	mir-28	14.6
mmu-miR-133a-3p	63	mature	mir-133	2.23
mmu-miR-10a-5p	2556	mature	mir-10	90.58
mmu-let-7b-5p	1848	mature	let-7	65.49
mmu-miR-499-5p	565	mature	mir-499	20.02
mmu-miR-486a-5p,mmu-miR-486b-5p	5734	mature	mir-486	203.19
mmu-miR-30e-3p	72	mature	mir-30	2.55
mmu-miR-382-5p	1	mature	mir-154	0.04
mmu-miR-192-5p	17062	mature	mir-192	604.62
mmu-miR-378c	3	mature	undef	0.11
mmu-miR-25-3p	11933	mature	mir-25	422.87
mmu-miR-19b-3p	338	mature	mir-19	11.98
mmu-miR-676-3p	531	mature	mir-676	18.82
mmu-let-7g-5p	6721	mature	let-7	238.17
mmu-miR-222-3p	55	mature	mir-221	1.95
mmu-miR-296-5p	136	mature	mir-296	4.82
mmu-miR-128-1-5p	13	mature	mir-128	0.46
mmu-miR-1983	1130	mature	undef	40.04
mmu-miR-181a-5p	355	mature	mir-181	12.58
mmu-miR-92a-3p	11597	mature	mir-25	410.96
mmu-miR-669b-5p	69	mature	mir-467	2.45
mmu-miR-378d	4	mature	undef	0.14
mmu-miR-146a-5p	35806	mature	mir-146	1268.84
mmu-miR-30a-5p	140	mature	mir-30	4.96
mmu-miR-3965	1	mature	undef	0.04
mmu-miR-6538	61	mature	undef	2.16
mmu-miR-24-3p	15136	mature	mir-24	536.37
mmu-miR-223-5p	1	mature	mir-223	0.04
mmu-miR-1199-5p	1	mature	mir-1199	0.04
mmu-miR-9-5p	1	mature	mir-9	0.04
mmu-miR-122-5p	25326	mature	mir-122	897.47
mmu-miR-27a-5p	1	mature	mir-27	0.04
mmu-miR-202-3p	1	mature	mir-202	0.04
mmu-miR-196a-5p	2	mature	mir-196	0.07
mmu-miR-369-5p	2	mature	mir-154	0.07
mmu-miR-134-5p	61	mature	mir-134	2.16
mmu-miR-1198-5p	33328	mature	undef	1181.03
mmu-miR-203-3p	1	mature	mir-203	0.04
mmu-miR-341-3p	344	mature	mir-341	12.19
mmu-miR-298-5p	1	mature	mir-298	0.04
mmu-miR-23a-3p	13024	mature	mir-23	461.53
mmu-miR-6948-3p	56	mature	undef	1.98
mmu-miR-100-5p	578	mature	mir-10	20.48
mmu-miR-145a-5p	10	mature	mir-145	0.35
mmu-miR-27b-3p	2864	mature	mir-27	101.49
mmu-miR-342-3p	1360	mature	mir-342	48.19
mmu-miR-15a-5p	604	mature	mir-15	21.4
mmu-miR-149-5p	134	mature	mir-149	4.75
mmu-miR-128-3p	1375	mature	mir-128	48.73
mmu-miR-29a-3p	282	mature	mir-29	9.99
mmu-miR-144-3p	350	mature	mir-144	12.4
mmu-miR-872-3p	371	mature	mir-872	13.15
mmu-miR-7043-3p	136	mature	undef	4.82
mmu-miR-296-3p	1	mature	mir-296	0.04
mmu-miR-148a-3p	59	mature	mir-148	2.09
mmu-miR-344-3p	54	mature	mir-344	1.91
mmu-miR-1197-3p	1	mature	mir-379	0.04
mmu-miR-652-5p	52	mature	mir-652	1.84
mmu-miR-384-3p	1	mature	mir-384	0.04
mmu-miR-674-3p	67	mature	mir-674	2.37
mmu-miR-181d-5p	1	mature	mir-181	0.04
mmu-miR-201-5p	3	mature	mir-743	0.11
mmu-miR-8114	1	mature	undef	0.04
mmu-miR-33-5p	4	mature	mir-33	0.14
mmu-miR-490-5p	75	mature	mir-490	2.66
mmu-miR-219a-2-3p	71	mature	mir-219	2.52
mmu-miR-150-5p	1409	mature	mir-150	49.93
mmu-miR-34c-3p	1	mature	mir-34	0.04
mmu-miR-409-3p	73	mature	mir-154	2.59
mmu-miR-362-3p	55	mature	mir-362	1.95
mmu-miR-126a-5p	235	mature	mir-126	8.33
mmu-miR-465a-3p,mmu-miR-465b-3p,mmu-miR-465c-3p	4	mature	mir-465	0.14
mmu-miR-1947-5p	1	mature	undef	0.04
mmu-let-7c-5p	6232	mature	let-7	220.84
mmu-miR-383-5p	1	mature	mir-383	0.04
mmu-miR-191-5p	8692	mature	mir-191	308.02
mmu-miR-142a-5p	291	mature	mir-142	10.31
novel_mir1	744	miRNA	NC_000076.6:-:91181413_91181483	26.36
novel_mir2	885	miRNA	NC_000071.6:+:123330830_123330893	31.36
novel_mir3	6062	miRNA	NC_000068.7:-:170257941_170258043	214.82
novel_mir4	11888	miRNA	NC_000067.6:+:35999106_35999150	421.27
novel_mir5	781	miRNA	NC_000072.6:+:26101634_26101685	27.68
novel_mir6	3913	miRNA	NC_000086.7:-:153726355_153726415	138.66
novel_mir7	385	miRNA	NC_000071.6:-:60672514_60672591	13.64
novel_mir8	2428	miRNA	NC_000080.6:-:70418968_70419036	86.04
novel_mir9	85	miRNA	NC_000070.6:-:132763685_132763752	3.01
novel_mir10	180	miRNA	NC_000079.6:+:91491763_91491819	6.38
novel_mir11	397	miRNA	NC_000068.7:-:162133623_162133675	14.07
novel_mir12	1139	miRNA	NC_000077.6:+:118575166_118575257	40.36
novel_mir13	35	miRNA	NC_000076.6:+:58589634_58589675	1.24
novel_mir14	213	miRNA	NC_000083.6:-:59459907_59459992	7.55
novel_mir15	135	miRNA	NC_000074.6:+:6079579_6079660	4.78
novel_mir16	881	miRNA	NC_000067.6:-:188833430_188833485	31.22
novel_mir17	44	miRNA	NC_000077.6:+:69588095_69588135	1.56
novel_mir18	308	miRNA	NC_000071.6:+:136279842_136279882	10.91
novel_mir19	448	miRNA	NC_000082.6:-:61079660_61079706	15.88
novel_mir20	127	miRNA	NC_000068.7:-:112168767_112168826	4.5
novel_mir21	86	miRNA	NC_000085.6:+:44700142_44700213	3.05
novel_mir22	65	miRNA	NT_187009.1:-:923079_923134	2.3
novel_mir23	42	miRNA	NC_000080.6:+:16204958_16205047	1.49
novel_mir25	43	miRNA	NC_000067.6:-:58256258_58256303	1.52
novel_mir26	746	miRNA	NC_000084.6:-:11989788_11989827	26.44
novel_mir27	58	miRNA	NC_000071.6:+:130432237_130432300	2.06
novel_mir28	24	miRNA	NC_000073.6:-:100414179_100414223	0.85
novel_mir29	96	miRNA	NC_000067.6:-:20741914_20741982	3.4
novel_mir30	156	miRNA	NC_000077.6:+:26418196_26418275	5.53
novel_mir31	36	miRNA	NC_000084.6:+:38341328_38341367	1.28
novel_mir33	35	miRNA	NC_000068.7:+:22589657_22589745	1.24
novel_mir34	377	miRNA	NC_000081.6:+:86097541_86097615	13.36
novel_mir37	289	miRNA	NC_000084.6:-:41731992_41732037	10.24
novel_mir38	80	miRNA	NC_000076.6:+:62922968_62923019	2.83
novel_mir39	122	miRNA	NC_000072.6:-:57475877_57475944	4.32
novel_mir40	142	miRNA	NC_000083.6:-:81645144_81645188	5.03
novel_mir41	161	miRNA	NC_000082.6:+:86985695_86985754	5.71
novel_mir42	249	miRNA	NC_000086.7:-:103939332_103939372	8.82
novel_mir43	1522	miRNA	NC_000071.6:-:99978470_99978516	53.93
novel_mir44	242	miRNA	NC_000074.6:+:108374449_108374506	8.58
novel_mir45	162	miRNA	NC_000086.7:-:59616743_59616795	5.74
novel_mir44	129	miRNA	NC_000072.6:+:8202434_8202491	4.57
novel_mir46	94	miRNA	NC_000078.6:+:56930936_56930982	3.33
novel_mir47	83	miRNA	NC_000080.6:-:60413061_60413130	2.94
novel_mir49	459	miRNA	NC_000070.6:-:33273942_33274017	16.27
novel_mir50	427	miRNA	NC_000078.6:-:106554028_106554071	15.13
novel_mir51	71	miRNA	NC_000067.6:+:192310835_192310892	2.52
novel_mir52	244	miRNA	NC_000068.7:-:81275822_81275881	8.65
novel_mir54	1067	miRNA	NC_000077.6:-:45980271_45980363	37.81
novel_mir55	93	miRNA	NC_000086.7:+:164078878_164078919	3.3
novel_mir56	44	miRNA	NC_000084.6:+:75463787_75463877	1.56
novel_mir57	47	miRNA	NC_000067.6:-:27490151_27490206	1.67
novel_mir58	220	miRNA	NC_000073.6:-:24553172_24553216	7.8
novel_mir59	95	miRNA	NC_000077.6:-:44345763_44345845	3.37
novel_mir60	1406	miRNA	NC_000074.6:-:123155711_123155747	49.82
novel_mir61	68	miRNA	NC_000080.6:+:68624305_68624351	2.41
novel_mir62	60	miRNA	NC_000069.6:-:145758824_145758869	2.13
novel_mir63	132	miRNA	NC_000069.6:+:32541808_32541876	4.68
novel_mir64	41	miRNA	NC_000072.6:-:130981407_130981475	1.45
novel_mir64	88	miRNA	NC_000072.6:-:130722507_130722575	3.12
novel_mir65	139	miRNA	NC_000077.6:+:35796631_35796682	4.93
novel_mir66	131	miRNA	NC_000068.7:+:112747955_112748035	4.64
novel_mir67	108	miRNA	NC_000079.6:-:48356360_48356424	3.83
novel_mir68	61	miRNA	NC_000086.7:+:42119817_42119860	2.16
novel_mir69	79	miRNA	NC_000084.6:+:76148901_76148993	2.8
novel_mir70	36	miRNA	NC_000086.7:-:65923024_65923100	1.28
novel_mir71	30	miRNA	NC_000078.6:-:47317213_47317275	1.06
novel_mir72	252	miRNA	NC_000067.6:+:34295813_34295873	8.93
novel_mir73	159	miRNA	NC_000071.6:-:102000383_102000427	5.63
novel_mir75	267	miRNA	NC_000073.6:+:38156637_38156724	9.46
novel_mir76	96	miRNA	NC_000085.6:-:56106171_56106223	3.4
novel_mir77	59	miRNA	NC_000068.7:-:27567714_27567804	2.09
novel_mir78	104	miRNA	NC_000076.6:-:80549436_80549484	3.69
novel_mir79	206	miRNA	NC_000071.6:-:150998995_150999079	7.3
novel_mir80	556	miRNA	NC_000083.6:-:5841146_5841209	19.7
novel_mir81	4726	miRNA	NC_000079.6:+:43481285_43481337	167.47
novel_mir82	3222	miRNA	NC_000068.7:+:181459529_181459621	114.18
novel_mir82	388	miRNA	NC_000068.7:+:181459598_181459664	13.75
novel_mir83	2213	miRNA	NC_000068.7:-:92183556_92183644	78.42
novel_mir84	58	miRNA	NC_000069.6:+:145758654_145758708	2.06
novel_mir85	173	miRNA	NC_000076.6:+:81559311_81559391	6.13
novel_mir87	2632	miRNA	NC_000081.6:-:102203956_102204024	93.27
novel_mir88	1780	miRNA	NC_000068.7:+:163054762_163054825	63.08
novel_mir80	455	miRNA	NC_000083.6:-:5841110_5841167	16.12
novel_mir91	919	miRNA	NC_000073.6:+:81859270_81859350	32.57
novel_mir92	19	miRNA	NC_000074.6:-:22227264_22227341	0.67
novel_mir93	719	miRNA	NC_000077.6:-:3290148_3290225	25.48
novel_mir94	375	miRNA	NC_000069.6:+:95659166_95659229	13.29
novel_mir95	97	miRNA	NC_000078.6:+:55820542_55820616	3.44
novel_mir96	277	miRNA	NC_000086.7:-:20291537_20291606	9.82
novel_mir97	29	miRNA	NC_000080.6:+:56865039_56865092	1.03
novel_mir98	2783	miRNA	NC_000083.6:-:46031750_46031799	98.62
novel_mir99	757	miRNA	NC_000081.6:-:98296233_98296276	26.83
novel_mir100	52	miRNA	NC_000068.7:-:179786094_179786132	1.84
novel_mir101	53	miRNA	NC_000084.6:+:41062181_41062221	1.88
novel_mir103	122	miRNA	NC_000081.6:+:48889735_48889810	4.32
novel_mir105	13891	miRNA	NC_000081.6:-:75748234_75748287	492.25
novel_mir106	354	miRNA	NT_187005.1:-:1312610_1312696	12.54
novel_mir107	139	miRNA	NC_000069.6:+:41565789_41565835	4.93
novel_mir108	12184	miRNA	NC_000068.7:+:162660772_162660816	431.76
novel_mir109	86	miRNA	NC_000073.6:-:19664892_19664954	3.05
novel_mir110	55	miRNA	NC_000086.7:+:8074616_8074665	1.95
novel_mir111	1803	miRNA	NC_000085.6:+:59345354_59345408	63.89
novel_mir112	122	miRNA	NC_000070.6:+:63261654_63261739	4.32
novel_mir114	212	miRNA	NC_000075.6:-:31281186_31281265	7.51
novel_mir115	88	miRNA	NC_000075.6:+:70679136_70679203	3.12
novel_mir116	213	miRNA	NC_000070.6:-:154636176_154636227	7.55
novel_mir117	67	miRNA	NC_000079.6:-:33734334_33734392	2.37
novel_mir119	588	miRNA	NC_000071.6:-:137531454_137531494	20.84
novel_mir120	72	miRNA	NC_000080.6:+:55115699_55115739	2.55
novel_mir121	81	miRNA	NC_000067.6:-:171080305_171080348	2.87
novel_mir122	392	miRNA	NC_000078.6:+:40446585_40446665	13.89
novel_mir123	89	miRNA	NC_000073.6:-:140857173_140857226	3.15
novel_mir125	10	miRNA	NC_000083.6:+:26892796_26892865	0.35
novel_mir124	938	miRNA	NC_000083.6:-:36032419_36032461	33.24
novel_mir127	5124	miRNA	NC_000075.6:-:20642110_20642160	181.58
novel_mir128	116	miRNA	NC_000076.6:-:80742143_80742216	4.11
novel_mir129	56	miRNA	NC_000071.6:+:110363316_110363383	1.98
novel_mir130	59	miRNA	NC_000073.6:-:127232910_127232978	2.09
novel_mir131	63	miRNA	NC_000086.7:+:164467992_164468074	2.23
novel_mir133	1282	miRNA	NC_000073.6:-:127614726_127614789	45.43
novel_mir135	1439	miRNA	NC_000069.6:+:89090487_89090577	50.99
novel_mir136	52	miRNA	NC_000080.6:+:118544280_118544319	1.84
novel_mir137	12	miRNA	NC_000083.6:-:46165578_46165662	0.43
novel_mir138	120	miRNA	NC_000085.6:+:8941905_8941965	4.25
novel_mir139	183	miRNA	NC_000074.6:+:119600779_119600851	6.48
novel_mir140	687	miRNA	NC_000068.7:+:164071224_164071286	24.34
novel_mir95	25	miRNA	NC_000078.6:+:55820596_55820644	0.89
novel_mir141	48	miRNA	NC_000073.6:+:99535194_99535252	1.7
novel_mir142	287	miRNA	NC_000085.6:-:46044727_46044800	10.17
novel_mir143	88	miRNA	NC_000068.7:-:156018597_156018666	3.12
novel_mir144	126	miRNA	NC_000083.6:+:43824957_43825038	4.47
novel_mir145	58	miRNA	NC_000068.7:+:93445084_93445158	2.06
novel_mir146	87	miRNA	NC_000081.6:-:85693780_85693841	3.08
novel_mir147	34	miRNA	NC_000067.6:+:105663991_105664032	1.2
novel_mir148	103	miRNA	NC_000072.6:+:71543896_71543968	3.65
novel_mir149	11	miRNA	NC_000068.7:-:31572546_31572628	0.39
novel_mir150	134	miRNA	NC_000082.6:+:43762434_43762503	4.75
novel_mir151	30	miRNA	NC_000073.6:+:145272609_145272681	1.06
novel_mir152	203	miRNA	NC_000071.6:+:111559417_111559476	7.19
novel_mir153	63	miRNA	NC_000068.7:-:145860270_145860334	2.23
novel_mir155	196	miRNA	NC_000081.6:-:73466760_73466806	6.95
novel_mir159	115	miRNA	NC_000070.6:-:136834899_136834966	4.08
novel_mir160	91	miRNA	NC_000077.6:+:51817207_51817288	3.22
novel_mir161	153	miRNA	NC_000077.6:+:119086355_119086420	5.42
novel_mir162	59	miRNA	NC_000077.6:-:97338612_97338698	2.09
novel_mir166	81	miRNA	NC_000067.6:+:91665025_91665069	2.87
novel_mir168	45	miRNA	NC_000075.6:+:107627215_107627270	1.59
novel_mir169	128	miRNA	NC_000068.7:-:165728943_165729012	4.54
novel_mir170	107	miRNA	NC_000076.6:-:70223176_70223260	3.79
novel_mir171	106	miRNA	NC_000081.6:-:99239742_99239814	3.76
novel_mir172	107	miRNA	NC_000085.6:+:6251617_6251695	3.79
novel_mir173	5282	miRNA	NC_000079.6:+:98925879_98925954	187.18
novel_mir174	852	miRNA	NC_000071.6:-:99728614_99728695	30.19
novel_mir175	44	miRNA	NC_000069.6:-:65392371_65392425	1.56
novel_mir176	976	miRNA	NC_000069.6:-:42177626_42177701	34.59
novel_mir178	547	miRNA	NC_000086.7:+:129750677_129750743	19.38
novel_mir179	113	miRNA	NC_000078.6:-:55398665_55398719	4
novel_mir180	264	miRNA	NC_000068.7:-:113216923_113217001	9.36
novel_mir181	464	miRNA	NC_000070.6:-:141893114_141893172	16.44
novel_mir184	182	miRNA	NC_000077.6:-:95600685_95600771	6.45
novel_mir185	75	miRNA	NC_000074.6:-:122486941_122486997	2.66
novel_mir186	83	miRNA	NC_000086.7:-:7922264_7922331	2.94
novel_mir187	3560	miRNA	NC_000073.6:-:139894848_139894921	126.15
novel_mir188	173	miRNA	NC_000081.6:-:85626253_85626305	6.13
novel_mir189	319	miRNA	NC_000074.6:+:25241394_25241451	11.3
novel_mir191	116	miRNA	NC_000074.6:-:47613368_47613427	4.11
novel_mir192	185	miRNA	NC_000078.6:-:3971138_3971208	6.56
novel_mir193	718	miRNA	NC_000086.7:-:73659266_73659307	25.44
novel_mir194	11	miRNA	NC_000073.6:+:131084762_131084837	0.39
novel_mir196	24	miRNA	NC_000077.6:+:78826787_78826841	0.85
novel_mir197	94	miRNA	NC_000068.7:-:156576326_156576401	3.33
novel_mir198	167	miRNA	NC_000074.6:-:124636231_124636279	5.92
novel_mir201	838	miRNA	NC_000074.6:-:123834471_123834536	29.7
novel_mir202	388	miRNA	NC_000072.6:+:132439457_132439516	13.75
novel_mir203	167	miRNA	NC_000072.6:+:92018966_92019028	5.92
novel_mir205	47	miRNA	NC_000083.6:+:27711211_27711255	1.67
novel_mir206	223	miRNA	NC_000067.6:+:178942745_178942799	7.9
novel_mir207	128	miRNA	NC_000077.6:-:56262597_56262658	4.54
novel_mir209	65	miRNA	NC_000074.6:-:104442546_104442628	2.3
novel_mir210	543	miRNA	NC_000073.6:+:141631188_141631256	19.24
novel_mir211	76	miRNA	NC_000071.6:-:129860354_129860412	2.69
novel_mir212	34	miRNA	NC_000070.6:-:102088016_102088098	1.2
novel_mir213	85	miRNA	NC_000070.6:+:10663875_10663982	3.01
novel_mir214	207	miRNA	NC_000071.6:-:100295342_100295411	7.34
novel_mir215	506	miRNA	NC_000080.6:-:55887309_55887386	17.93
novel_mir217	33	miRNA	NC_000071.6:+:21827536_21827598	1.17
novel_mir105	113	miRNA	NC_000084.6:+:46198854_46198909	4
novel_mir219	77	miRNA	NC_000077.6:-:119870701_119870768	2.73
novel_mir220	178	miRNA	NC_000076.6:-:60781756_60781831	6.31
novel_mir221	145	miRNA	NC_000083.6:-:46912334_46912400	5.14
novel_mir222	350	miRNA	NC_000075.6:-:91365920_91365983	12.4
novel_mir223	96	miRNA	NC_000083.6:-:27751630_27751692	3.4
novel_mir224	62	miRNA	NC_000082.6:-:35717321_35717377	2.2
novel_mir226	138	miRNA	NC_000071.6:+:130222295_130222372	4.89
novel_mir227	5177	miRNA	NC_000079.6:-:42052748_42052821	183.46
novel_mir228	85	miRNA	NC_000068.7:+:167217386_167217470	3.01
novel_mir230	219	miRNA	NC_000081.6:-:75672830_75672905	7.76
novel_mir231	170	miRNA	NC_000068.7:-:164669203_164669274	6.02
novel_mir232	2773	miRNA	NC_000071.6:+:34187172_34187219	98.27
novel_mir233	96	miRNA	NC_000069.6:+:107443551_107443635	3.4
novel_mir234	163	miRNA	NC_000083.6:-:33551318_33551398	5.78
novel_mir235	32	miRNA	NC_000076.6:-:123196934_123197001	1.13
novel_mir236	125	miRNA	NC_000073.6:-:115578074_115578147	4.43
novel_mir237	1151	miRNA	NC_000076.6:-:26374343_26374407	40.79
novel_mir238	115	miRNA	NC_000082.6:+:91904225_91904306	4.08
novel_mir239	73	miRNA	NC_000073.6:-:52005684_52005738	2.59
novel_mir241	72	miRNA	NC_000085.6:-:55192360_55192416	2.55
novel_mir242	238	miRNA	NC_000077.6:-:103339000_103339052	8.43
novel_mir226	44	miRNA	NC_000071.6:+:130222273_130222313	1.56
novel_mir243	17	miRNA	NC_000076.6:+:61002725_61002790	0.6
novel_mir244	87	miRNA	NC_000073.6:-:127117744_127117809	3.08
novel_mir245	163	miRNA	NC_000077.6:+:106167001_106167077	5.78
novel_mir247	50	miRNA	NC_000073.6:+:79793512_79793584	1.77
novel_mir248	86	miRNA	NC_000071.6:-:41860705_41860786	3.05
novel_mir251	356	miRNA	NC_000070.6:-:118455855_118455911	12.62
novel_mir253	58	miRNA	NC_000067.6:-:39391007_39391055	2.06
novel_mir255	107	miRNA	NC_000067.6:+:191906818_191906885	3.79
novel_mir257	372	miRNA	NC_000068.7:+:172830524_172830572	13.18
novel_mir258	44	miRNA	NC_000073.6:-:44866787_44866858	1.56
novel_mir259	46	miRNA	NC_000067.6:-:165691828_165691888	1.63
novel_mir260	239	miRNA	NC_000073.6:-:75762483_75762575	8.47
novel_mir261	10	miRNA	NC_000073.6:-:121713930_121714000	0.35
novel_mir262	43	miRNA	NC_000075.6:+:52677697_52677771	1.52
novel_mir263	95	miRNA	NC_000071.6:+:120322259_120322317	3.37
novel_mir264	59	miRNA	NC_000073.6:+:28506571_28506639	2.09
novel_mir265	32	miRNA	NC_000072.6:+:125236478_125236520	1.13
novel_mir267	83	miRNA	NC_000071.6:-:33259686_33259738	2.94
novel_mir268	231	miRNA	NC_000077.6:-:74724019_74724098	8.19
novel_mir270	92	miRNA	NC_000073.6:+:78807627_78807689	3.26
novel_mir272	244	miRNA	NC_000072.6:-:37687054_37687104	8.65
novel_mir273	30	miRNA	NC_000077.6:-:78035803_78035887	1.06
novel_mir274	468	miRNA	NT_187064.1:+:48742_48817	16.58
novel_mir275	71	miRNA	NC_000070.6:-:155224112_155224189	2.52
novel_mir276	33	miRNA	NC_000070.6:+:126324411_126324474	1.17
novel_mir277	461	miRNA	NC_000075.6:-:20749951_20750033	16.34
novel_mir278	36	miRNA	NC_000077.6:+:117946651_117946701	1.28
novel_mir279	472	miRNA	NC_000082.6:-:30886410_30886485	16.73
novel_mir280	185	miRNA	NC_000068.7:-:30033123_30033182	6.56
novel_mir97	108	miRNA	NC_000071.6:-:93206163_93206227	3.83
novel_mir282	2036	miRNA	NC_000076.6:+:80857300_80857381	72.15
novel_mir283	66	miRNA	NC_000081.6:+:97072263_97072321	2.34
novel_mir284	25	miRNA	NC_000068.7:-:90522887_90522929	0.89
novel_mir285	16235	miRNA	NC_000070.6:+:114339859_114339917	575.31
novel_mir286	89	miRNA	NC_000083.6:-:13405663_13405730	3.15
novel_mir287	116	miRNA	NC_000068.7:+:58487475_58487517	4.11
novel_mir290	31	miRNA	NC_000067.6:+:132515446_132515501	1.1
novel_mir291	36	miRNA	NC_000079.6:+:114155550_114155614	1.28
novel_mir294	43	miRNA	NC_000079.6:+:51296852_51296912	1.52
novel_mir296	24	miRNA	NC_000073.6:+:52535830_52535898	0.85
novel_mir297	64	miRNA	NC_000073.6:-:43344720_43344790	2.27
novel_mir298	501	miRNA	NC_000073.6:-:81934338_81934403	17.75
novel_mir299	29	miRNA	NC_000071.6:+:88648018_88648074	1.03
novel_mir301	126	miRNA	NC_000077.6:+:97463225_97463314	4.47
novel_mir303	99	miRNA	NC_000070.6:-:139265196_139265274	3.51
novel_mir304	97	miRNA	NC_000083.6:+:15236517_15236575	3.44
novel_mir305	40	miRNA	NC_000078.6:-:17060971_17061026	1.42
novel_mir308	44	miRNA	NC_000084.6:-:34275673_34275750	1.56
novel_mir311	96	miRNA	NC_000071.6:+:31068611_31068673	3.4
novel_mir312	34	miRNA	NC_000075.6:+:58067584_58067630	1.2
novel_mir313	48	miRNA	NC_000070.6:-:62502116_62502175	1.7
novel_mir315	108	miRNA	NC_000078.6:+:80575656_80575745	3.83
novel_mir316	35	miRNA	NC_000070.6:-:151761104_151761192	1.24
novel_mir317	193	miRNA	NC_000081.6:+:77354976_77355015	6.84
novel_mir318	123	miRNA	NC_000072.6:-:88241368_88241448	4.36
novel_mir319	126	miRNA	NC_000073.6:+:24450551_24450604	4.47
novel_mir320	14	miRNA	NC_000076.6:+:48243657_48243697	0.5
novel_mir322	64	miRNA	NC_000081.6:-:99699844_99699936	2.27
novel_mir323	199	miRNA	NC_000067.6:+:143610248_143610320	7.05
novel_mir324	80	miRNA	NC_000072.6:+:29441442_29441491	2.83
novel_mir325	71	miRNA	NC_000083.6:+:83222927_83222983	2.52
novel_mir326	172	miRNA	NC_000075.6:+:16863178_16863244	6.1
novel_mir328	48	miRNA	NC_000068.7:-:131902909_131902951	1.7
novel_mir329	107	miRNA	NT_039634.4:-:394662_394717	3.79
novel_mir330	20	miRNA	NC_000077.6:+:84958350_84958435	0.71
novel_mir331	56	miRNA	NC_000068.7:+:32185267_32185356	1.98
novel_mir333	37	miRNA	NC_000083.6:+:28028204_28028272	1.31
novel_mir103	34	miRNA	NC_000081.6:+:48889790_48889842	1.2
novel_mir334	23	miRNA	NC_000077.6:-:118825855_118825908	0.82
novel_mir335	137	miRNA	NC_000068.7:+:122240907_122240973	4.85
novel_mir336	96	miRNA	NC_000077.6:+:7071300_7071348	3.4
novel_mir337	67	miRNA	NC_000074.6:+:84033938_84034009	2.37
novel_mir340	972	miRNA	NC_000068.7:-:74661221_74661296	34.44
novel_mir341	95	miRNA	NC_000073.6:+:141217045_141217116	3.37
novel_mir342	54	miRNA	NC_000085.6:+:44750991_44751064	1.91
novel_mir343	24	miRNA	NC_000073.6:+:98104502_98104581	0.85
novel_mir344	70	miRNA	NC_000075.6:-:20771654_20771701	2.48
novel_mir345	126	miRNA	NC_000073.6:-:113293753_113293829	4.47
novel_mir346	39	miRNA	NC_000074.6:-:94696151_94696210	1.38
novel_mir347	651	miRNA	NC_000083.6:-:45349886_45349936	23.07
novel_mir348	55	miRNA	NC_000083.6:-:45970747_45970837	1.95
novel_mir349	512	miRNA	NC_000074.6:-:70167218_70167293	18.14
novel_mir351	64	miRNA	NC_000083.6:-:31845144_31845206	2.27
novel_mir354	14	miRNA	NC_000079.6:-:103643152_103643197	0.5
novel_mir355	132	miRNA	NC_000076.6:+:127984611_127984689	4.68
novel_mir356	171	miRNA	NC_000069.6:-:66000817_66000865	6.06
novel_mir357	447	miRNA	NC_000074.6:+:94418880_94418962	15.84
novel_mir358	256	miRNA	NC_000081.6:-:78876371_78876424	9.07
novel_mir359	15	miRNA	NC_000079.6:-:96542324_96542391	0.53
novel_mir360	128	miRNA	NC_000084.6:-:68161002_68161049	4.54
novel_mir361	187	miRNA	NC_000068.7:-:35517737_35517815	6.63
novel_mir363	5305	miRNA	NC_000072.6:+:17307623_17307665	187.99
novel_mir364	95	miRNA	NC_000083.6:-:8987034_8987116	3.37
novel_mir365	130	miRNA	NC_000071.6:-:134117579_134117644	4.61
novel_mir369	187	miRNA	NC_000074.6:-:118895103_118895170	6.63
novel_mir370	66	miRNA	NC_000072.6:+:84058837_84058902	2.34
novel_mir371	389	miRNA	NC_000074.6:-:23197486_23197564	13.78
novel_mir372	160	miRNA	NC_000067.6:+:172629990_172630060	5.67
novel_mir374	96	miRNA	NC_000071.6:-:121394267_121394326	3.4
novel_mir377	197	miRNA	NC_000072.6:-:136750683_136750736	6.98
novel_mir380	21	miRNA	NC_000071.6:-:145114722_145114793	0.74
novel_mir381	191	miRNA	NC_000068.7:-:120284154_120284202	6.77
novel_mir382	22	miRNA	NC_000067.6:-:52708667_52708719	0.78
novel_mir383	95	miRNA	NC_000081.6:-:7568080_7568159	3.37
novel_mir384	88	miRNA	NC_000072.6:+:114072188_114072237	3.12
novel_mir385	124	miRNA	NT_039662.3:+:1411517_1411585	4.39
novel_mir386	155	miRNA	NC_000081.6:+:80274225_80274275	5.49
novel_mir387	171	miRNA	NC_000071.6:-:125141636_125141730	6.06
novel_mir388	753	miRNA	NC_000077.6:-:21989852_21989925	26.68
novel_mir389	276	miRNA	NC_000075.6:-:56438153_56438221	9.78
novel_mir344	58	miRNA	NC_000075.6:-:20771681_20771736	2.06
novel_mir390	176	miRNA	NC_000070.6:-:126155558_126155626	6.24
novel_mir392	120	miRNA	NC_000075.6:+:110635080_110635146	4.25
novel_mir393	81	miRNA	NC_000075.6:-:118678988_118679030	2.87
novel_mir394	92	miRNA	NC_000073.6:-:132628682_132628768	3.26
novel_mir395	187	miRNA	NC_000070.6:-:140479923_140480004	6.63
novel_mir398	188	miRNA	NT_187004.1:-:1182701_1182783	6.66
novel_mir401	200	miRNA	NC_000073.6:-:78574928_78574997	7.09
novel_mir403	372	miRNA	NC_000068.7:+:31279089_31279169	13.18
novel_mir404	39	miRNA	NC_000068.7:-:11523151_11523233	1.38
novel_mir405	75	miRNA	NC_000069.6:+:105770272_105770347	2.66
novel_mir140	38	miRNA	NC_000068.7:+:164071264_164071349	1.35
novel_mir406	42	miRNA	NC_000079.6:+:41605511_41605583	1.49
novel_mir407	91	miRNA	NT_187007.1:-:88413_88477	3.22
novel_mir410	134	miRNA	NC_000081.6:-:97953917_97954005	4.75
novel_mir412	144	miRNA	NC_000079.6:+:105100899_105100960	5.1
novel_mir413	32	miRNA	NC_000082.6:+:29314631_29314682	1.13
novel_mir415	33	miRNA	NC_000071.6:+:121835513_121835575	1.17
novel_mir416	118	miRNA	NC_000085.6:+:55599730_55599777	4.18
novel_mir418	108	miRNA	NC_000070.6:-:142859763_142859820	3.83
novel_mir419	27	miRNA	NC_000076.6:+:18020587_18020660	0.96
novel_mir420	123	miRNA	NC_000078.6:+:106928485_106928536	4.36
novel_mir421	189	miRNA	NC_000077.6:+:78484668_78484723	6.7
novel_mir422	204	miRNA	NC_000069.6:+:122786226_122786303	7.23
novel_mir423	75	miRNA	NC_000077.6:-:100894658_100894715	2.66
novel_mir424	93	miRNA	NC_000083.6:-:4329523_4329615	3.3
novel_mir425	80	miRNA	NC_000071.6:-:125222570_125222614	2.83
novel_mir426	12	miRNA	NC_000068.7:+:174644614_174644687	0.43
novel_mir428	84	miRNA	NC_000073.6:-:26410479_26410531	2.98
novel_mir429	61	miRNA	NC_000074.6:+:30913879_30913947	2.16
novel_mir431	35	miRNA	NC_000069.6:+:98230560_98230610	1.24
novel_mir432	220	miRNA	NC_000077.6:-:3410316_3410393	7.8
novel_mir433	117	miRNA	NC_000076.6:-:117966368_117966448	4.15
novel_mir435	53	miRNA	NC_000077.6:+:54438662_54438718	1.88
novel_mir436	85	miRNA	NC_000074.6:+:71297609_71297691	3.01
novel_mir437	28	miRNA	NC_000071.6:+:124636415_124636469	0.99
novel_mir438	106	miRNA	NC_000072.6:-:115803916_115803998	3.76
novel_mir439	151	miRNA	NC_000067.6:-:170682272_170682340	5.35
novel_mir443	143	miRNA	NC_000072.6:+:138828095_138828171	5.07
novel_mir445	76	miRNA	NC_000077.6:-:57300441_57300522	2.69
novel_mir446	155	miRNA	NC_000081.6:-:98869698_98869776	5.49
novel_mir447	73	miRNA	NC_000070.6:+:63426569_63426635	2.59
novel_mir448	115	miRNA	NC_000070.6:+:151956513_151956561	4.08
novel_mir450	37	miRNA	NC_000077.6:+:61018096_61018158	1.31
novel_mir451	72	miRNA	NC_000075.6:+:122006921_122006996	2.55
novel_mir452	33	miRNA	NC_000082.6:+:35811198_35811266	1.17
novel_mir453	223	miRNA	NC_000080.6:+:54271761_54271847	7.9
novel_mir454	61	miRNA	NC_000077.6:-:97981476_97981557	2.16
novel_mir455	113	miRNA	NC_000074.6:-:60759029_60759084	4
novel_mir456	13	miRNA	NC_000079.6:-:14043080_14043151	0.46
novel_mir459	60	miRNA	NC_000070.6:-:139871903_139871977	2.13
novel_mir460	85	miRNA	NC_000074.6:+:101253022_101253096	3.01
novel_mir461	92	miRNA	NC_000075.6:+:58489348_58489423	3.26
novel_mir464	52	miRNA	NC_000086.7:+:25752705_25752781	1.84
novel_mir465	46	miRNA	NC_000079.6:+:55400791_55400856	1.63
novel_mir467	94	miRNA	NC_000075.6:-:120602887_120602952	3.33
novel_mir468	18339	miRNA	NC_000084.6:+:75380583_75380647	649.87
novel_mir471	53	miRNA	NC_000075.6:+:115220074_115220116	1.88
novel_mir472	80	miRNA	NC_000080.6:+:24376980_24377054	2.83
novel_mir474	37	miRNA	NC_000081.6:-:39196976_39197012	1.31
novel_mir475	44	miRNA	NC_000076.6:-:120031503_120031575	1.56
novel_mir476	97	miRNA	NC_000074.6:+:95047129_95047182	3.44
novel_mir477	81	miRNA	NC_000082.6:+:38062460_38062545	2.87
novel_mir479	76	miRNA	NC_000070.6:-:137920998_137921052	2.69
novel_mir480	280	miRNA	NC_000083.6:-:10223854_10223928	9.92
novel_mir482	156	miRNA	NC_000073.6:-:83753956_83754030	5.53
novel_mir483	107	miRNA	NC_000077.6:+:69303191_69303253	3.79
novel_mir484	80	miRNA	NC_000076.6:+:60478732_60478790	2.83
novel_mir178	98	miRNA	NC_000086.7:+:129750624_129750697	3.47
novel_mir487	74	miRNA	NC_000077.6:+:97380146_97380217	2.62
novel_mir488	110	miRNA	NC_000071.6:+:30772246_30772325	3.9
novel_mir489	48	miRNA	NC_000077.6:-:6444601_6444689	1.7
novel_mir490	147	miRNA	NC_000068.7:-:157334553_157334592	5.21
novel_mir491	151	miRNA	NC_000079.6:+:48468962_48469030	5.35
novel_mir493	59	miRNA	NC_000077.6:-:119979481_119979570	2.09
novel_mir494	748	miRNA	NC_000075.6:-:59353395_59353472	26.51
novel_mir495	66	miRNA	NC_000074.6:+:94543419_94543473	2.34
novel_mir496	58	miRNA	NC_000071.6:-:21458036_21458107	2.06
novel_mir497	112	miRNA	NC_000072.6:+:113616239_113616284	3.97
novel_mir498	68	miRNA	NC_000068.7:-:35257096_35257173	2.41
novel_mir499	23	miRNA	NC_000067.6:+:83923253_83923325	0.82
novel_mir500	79	miRNA	NC_000086.7:-:142972772_142972824	2.8
novel_mir502	46	miRNA	NC_000074.6:-:122242851_122242911	1.63
novel_mir504	85	miRNA	NC_000080.6:+:74784796_74784853	3.01
novel_mir505	78	miRNA	NC_000077.6:-:69229122_69229173	2.76
novel_mir506	69	miRNA	NT_187023.1:-:1871965_1872044	2.45
novel_mir507	582	miRNA	NC_000073.6:-:112204095_112204164	20.62
novel_mir508	201	miRNA	NC_000083.6:+:28269734_28269797	7.12
novel_mir509	139	miRNA	NC_000082.6:-:34229462_34229534	4.93
novel_mir511	59	miRNA	NC_000072.6:-:99327967_99328013	2.09
novel_mir512	23	miRNA	NC_000071.6:+:67362370_67362445	0.82
novel_mir513	201	miRNA	NC_000067.6:-:127306612_127306655	7.12
novel_mir514	104	miRNA	NC_000073.6:+:16895126_16895188	3.69
novel_mir516	245	miRNA	NC_000077.6:-:43506720_43506800	8.68
novel_mir517	80	miRNA	NC_000074.6:-:13609997_13610069	2.83
novel_mir519	26	miRNA	NC_000077.6:-:88548858_88548926	0.92
novel_mir520	75	miRNA	NC_000074.6:-:124318939_124319001	2.66
novel_mir521	237	miRNA	NC_000074.6:-:84764064_84764144	8.4
novel_mir522	51	miRNA	NC_000073.6:-:66297168_66297213	1.81
novel_mir523	78	miRNA	NC_000073.6:-:130451454_130451511	2.76
novel_mir524	86	miRNA	NW_016097318.1:+:134727_134805	3.05
novel_mir526	62	miRNA	NC_000070.6:+:11388018_11388056	2.2
novel_mir527	49	miRNA	NC_000078.6:+:103174717_103174795	1.74
novel_mir529	45	miRNA	NC_000074.6:-:4226582_4226639	1.59
novel_mir530	372	miRNA	NC_000074.6:+:119524461_119524514	13.18
novel_mir531	132	miRNA	NC_000078.6:+:103489233_103489292	4.68
novel_mir532	59	miRNA	NC_000069.6:+:96154780_96154853	2.09
novel_mir533	89	miRNA	NC_000071.6:-:135911555_135911627	3.15
novel_mir535	27	miRNA	NC_000078.6:+:105475393_105475484	0.96
novel_mir537	52	miRNA	NC_000067.6:-:168221153_168221210	1.84
novel_mir539	175	miRNA	NC_000071.6:+:24964973_24965021	6.2
novel_mir540	60	miRNA	NC_000079.6:-:100902813_100902887	2.13
novel_mir541	77	miRNA	NC_000067.6:+:155220491_155220564	2.73
novel_mir542	376	miRNA	NC_000083.6:+:11062207_11062293	13.32
novel_mir544	35	miRNA	NC_000077.6:-:119502694_119502743	1.24
novel_mir548	17	miRNA	NC_000073.6:-:109607150_109607228	0.6
novel_mir551	134	miRNA	NC_000067.6:-:35810092_35810164	4.75
novel_mir553	38	miRNA	NC_000070.6:+:152349430_152349468	1.35
novel_mir556	33	miRNA	NC_000074.6:+:84928843_84928915	1.17
novel_mir557	83	miRNA	NC_000079.6:-:70731754_70731799	2.94
novel_mir559	81	miRNA	NC_000075.6:-:107888255_107888310	2.87
novel_mir561	33	miRNA	NC_000078.6:+:18399339_18399403	1.17
novel_mir564	22	miRNA	NT_187005.1:+:34561_34619	0.78
novel_mir565	106	miRNA	NT_187023.1:-:1037583_1037633	3.76
novel_mir566	143	miRNA	NC_000071.6:+:134676121_134676208	5.07
novel_mir567	84	miRNA	NC_000081.6:-:74909000_74909041	2.98
novel_mir568	43	miRNA	NC_000069.6:-:142124897_142124964	1.52
novel_mir569	134	miRNA	NC_000077.6:+:5848001_5848044	4.75
novel_mir570	104	miRNA	NC_000081.6:+:76683351_76683399	3.69
novel_mir572	89	miRNA	NC_000067.6:+:187664448_187664514	3.15
novel_mir576	314	miRNA	NC_000067.6:-:40326083_40326147	11.13
novel_mir577	137	miRNA	NC_000075.6:-:90193855_90193927	4.85
novel_mir578	132	miRNA	NT_166305.2:+:1291253_1291339	4.68
novel_mir581	83	miRNA	NC_000070.6:-:135925402_135925458	2.94
novel_mir582	17	miRNA	NC_000083.6:+:29821355_29821412	0.6
novel_mir583	29	miRNA	NC_000069.6:+:95987559_95987619	1.03
novel_mir585	76	miRNA	NC_000077.6:+:54119298_54119379	2.69
novel_mir586	171	miRNA	NC_000080.6:-:99578379_99578414	6.06
novel_mir587	6933	miRNA	NC_000074.6:+:23039294_23039360	245.68
novel_mir227	666	miRNA	NC_000085.6:-:12476813_12476870	23.6
novel_mir589	237	miRNA	NC_000077.6:+:113198918_113198972	8.4
novel_mir590	14	miRNA	NC_000076.6:-:61377387_61377459	0.5
novel_mir591	102	miRNA	NC_000078.6:+:73000417_73000499	3.61
novel_mir592	53	miRNA	NC_000076.6:+:70646557_70646635	1.88
novel_mir596	664	miRNA	NC_000067.6:+:12440152_12440203	23.53
novel_mir597	28	miRNA	NC_000073.6:-:128715744_128715792	0.99
novel_mir602	51	miRNA	NC_000071.6:+:122934487_122934566	1.81
novel_mir603	125	miRNA	NC_000071.6:+:112351609_112351690	4.43
novel_mir605	66	miRNA	NC_000074.6:+:126729295_126729378	2.34
novel_mir607	99	miRNA	NC_000069.6:-:120878810_120878890	3.51
novel_mir608	61	miRNA	NC_000077.6:-:47887154_47887204	2.16
novel_mir609	55	miRNA	NC_000078.6:-:4162390_4162467	1.95
novel_mir610	40	miRNA	NC_000070.6:-:9052133_9052207	1.42
novel_mir612	102	miRNA	NC_000085.6:-:15336269_15336329	3.61
novel_mir613	53	miRNA	NC_000068.7:+:80435013_80435074	1.88
novel_mir616	50	miRNA	NC_000079.6:-:101848732_101848784	1.77
novel_mir617	312	miRNA	NC_000070.6:+:104510091_104510133	11.06
novel_mir618	692	miRNA	NC_000069.6:-:156578540_156578613	24.52
novel_mir619	88	miRNA	NC_000070.6:+:116221621_116221695	3.12
novel_mir620	22	miRNA	NC_000073.6:+:28894972_28895016	0.78
novel_mir621	73	miRNA	NC_000068.7:-:73308542_73308623	2.59
novel_mir622	26	miRNA	NC_000068.7:+:14475028_14475070	0.92
novel_mir625	43	miRNA	NC_000078.6:-:113516727_113516778	1.52
novel_mir626	165	miRNA	NC_000076.6:+:52340409_52340480	5.85
novel_mir627	106	miRNA	NC_000069.6:+:27967671_27967728	3.76
novel_mir628	158	miRNA	NC_000080.6:+:92988123_92988201	5.6
novel_mir523	85	miRNA	NC_000073.6:-:130451488_130451546	3.01
novel_mir630	93	miRNA	NC_000070.6:-:152575707_152575751	3.3
novel_mir631	40	miRNA	NC_000072.6:+:97449692_97449770	1.42
novel_mir632	111	miRNA	NC_000067.6:-:194503774_194503834	3.93
novel_mir633	3625	miRNA	NC_000075.6:-:123555301_123555350	128.46
novel_mir636	57	miRNA	NC_000067.6:-:87036528_87036581	2.02
novel_mir637	38	miRNA	NC_000082.6:+:91506141_91506208	1.35
novel_mir639	1052	miRNA	NC_000073.6:-:92669817_92669890	37.28
novel_mir640	108	miRNA	NC_000073.6:-:101382701_101382787	3.83
novel_mir642	88	miRNA	NC_000081.6:+:79319470_79319522	3.12
novel_mir643	82	miRNA	NC_000078.6:-:32232695_32232766	2.91
novel_mir644	80	miRNA	NC_000070.6:-:107374154_107374196	2.83
novel_mir645	89	miRNA	NC_000074.6:+:104639936_104639993	3.15
novel_mir647	138	miRNA	NC_000083.6:+:64685333_64685398	4.89
novel_mir648	36	miRNA	NC_000075.6:+:68781148_68781198	1.28
novel_mir650	62	miRNA	NC_000078.6:-:29974873_29974919	2.2
novel_mir652	39	miRNA	NC_000071.6:-:117343720_117343765	1.38
novel_mir653	98	miRNA	NC_000068.7:-:11854588_11854661	3.47
novel_mir654	11	miRNA	NC_000073.6:+:135477584_135477654	0.39
novel_mir655	76	miRNA	NC_000076.6:-:124106330_124106403	2.69
novel_mir656	55	miRNA	NC_000076.6:+:84048839_84048904	1.95
novel_mir657	19	miRNA	NC_000068.7:+:52931708_52931791	0.67
novel_mir658	85	miRNA	NC_000074.6:+:117763127_117763198	3.01
novel_mir659	33	miRNA	NC_000081.6:+:79141553_79141603	1.17
novel_mir661	69	miRNA	NC_000068.7:-:102916232_102916307	2.45
novel_mir527	56	miRNA	NC_000078.6:+:103174669_103174747	1.98
novel_mir662	39	miRNA	NC_000070.6:+:148602605_148602695	1.38
novel_mir663	165	miRNA	NC_000072.6:-:95597302_95597357	5.85
novel_mir664	40	miRNA	NC_000067.6:-:180977981_180978027	1.42
novel_mir665	134	miRNA	NC_000067.6:+:136727667_136727736	4.75
novel_mir666	41	miRNA	NC_000079.6:+:50047219_50047294	1.45
novel_mir667	38	miRNA	NC_000087.7:-:90739685_90739740	1.35
novel_mir671	126	miRNA	NC_000071.6:-:99862021_99862093	4.47
novel_mir674	69	miRNA	NT_187007.1:+:327450_327490	2.45
novel_mir676	84	miRNA	NC_000068.7:+:174264137_174264209	2.98
novel_mir677	104	miRNA	NC_000074.6:-:95972557_95972613	3.69
novel_mir679	60	miRNA	NC_000076.6:+:80030891_80030952	2.13
novel_mir680	110	miRNA	NC_000076.6:-:50504371_50504449	3.9
novel_mir681	77	miRNA	NT_166293.1:+:77090_77161	2.73
novel_mir356	13	miRNA	NC_000069.6:-:66000769_66000837	0.46
novel_mir683	585	miRNA	NC_000075.6:-:67561177_67561257	20.73
novel_mir684	75	miRNA	NC_000068.7:+:160232649_160232712	2.66
novel_mir686	219	miRNA	NC_000068.7:+:131140811_131140899	7.76
novel_mir687	98	miRNA	NC_000077.6:+:73237398_73237451	3.47
novel_mir688	322	miRNA	NC_000079.6:+:52639529_52639586	11.41
novel_mir690	28	miRNA	NC_000072.6:-:127017651_127017738	0.99
novel_mir691	1284	miRNA	NC_000070.6:-:84797942_84798042	45.5
novel_mir692	53	miRNA	NC_000071.6:+:124835254_124835336	1.88
novel_mir693	42	miRNA	NC_000072.6:-:85186426_85186503	1.49
novel_mir695	26	miRNA	NC_000068.7:+:118597288_118597345	0.92
novel_mir697	43	miRNA	NC_000082.6:+:10570555_10570605	1.52
novel_mir698	79	miRNA	NC_000072.6:+:72674992_72675069	2.8
novel_mir699	13	miRNA	NC_000080.6:+:63446885_63446930	0.46
novel_mir700	1269	miRNA	NC_000069.6:-:137950427_137950486	44.97
novel_mir701	53	miRNA	NC_000077.6:-:118709862_118709916	1.88
novel_mir702	139	miRNA	NC_000072.6:+:113280680_113280730	4.93
novel_mir703	110	miRNA	NC_000074.6:+:71470454_71470523	3.9
novel_mir704	232	miRNA	NW_004450262.2:+:165710_165792	8.22
novel_mir706	44	miRNA	NC_000074.6:+:108689313_108689377	1.56
novel_mir707	72	miRNA	NC_000069.6:-:38852849_38852925	2.55
novel_mir709	38	miRNA	NC_000070.6:+:40636828_40636901	1.35
novel_mir710	49	miRNA	NC_000073.6:+:116197378_116197445	1.74
novel_mir711	943	miRNA	NC_000068.7:+:151751558_151751634	33.42
novel_mir712	274	miRNA	NC_000085.6:-:5059859_5059936	9.71
novel_mir713	168	miRNA	NC_000077.6:-:105949753_105949827	5.95
novel_mir714	121	miRNA	NC_000073.6:+:25359933_25359971	4.29
novel_mir715	119	miRNA	NC_000071.6:+:122172008_122172048	4.22
novel_mir716	173	miRNA	NC_000084.6:+:52179540_52179584	6.13
novel_mir718	53	miRNA	NC_000068.7:-:124673343_124673415	1.88
novel_mir719	67	miRNA	NC_000084.6:-:63865455_63865505	2.37
novel_mir722	47	miRNA	NC_000081.6:-:101708860_101708937	1.67
novel_mir723	1008	miRNA	NC_000077.6:-:53088945_53088986	35.72
novel_mir725	75	miRNA	NC_000083.6:-:4265968_4266013	2.66
novel_mir726	68	miRNA	NC_000067.6:+:171284975_171285055	2.41
novel_mir727	102	miRNA	NC_000072.6:-:107644025_107644101	3.61
novel_mir553	112	miRNA	NC_000070.6:+:152349449_152349524	3.97
novel_mir728	56	miRNA	NC_000079.6:-:30261181_30261247	1.98
novel_mir729	328	miRNA	NC_000082.6:-:13928933_13928984	11.62
novel_mir730	88	miRNA	NC_000070.6:-:63056510_63056583	3.12
novel_mir731	50	miRNA	NC_000078.6:+:74205578_74205617	1.77
novel_mir733	95	miRNA	NC_000085.6:+:46320912_46320974	3.37
novel_mir734	75	miRNA	NC_000074.6:-:85548620_85548676	2.66
novel_mir736	30	miRNA	NC_000073.6:-:44263144_44263203	1.06
novel_mir737	94	miRNA	NC_000077.6:-:118964475_118964530	3.33
novel_mir118	88	miRNA	NC_000077.6:-:59475989_59476052	3.12
novel_mir741	49	miRNA	NC_000077.6:+:95242186_95242221	1.74
novel_mir743	41	miRNA	NC_000071.6:+:150183062_150183127	1.45
novel_mir744	55	miRNA	NC_000068.7:+:36168630_36168682	1.95
novel_mir746	56	miRNA	NC_000070.6:+:127533932_127533979	1.98
novel_mir747	229	miRNA	NC_000072.6:+:4110608_4110690	8.11
novel_mir748	102	miRNA	NC_000074.6:+:65821293_65821356	3.61
novel_mir749	43	miRNA	NC_000081.6:+:73762484_73762572	1.52
novel_mir751	18	miRNA	NT_166305.2:+:3409375_3409447	0.64
novel_mir752	79	miRNA	NT_187027.1:+:3202050_3202097	2.8
novel_mir754	61	miRNA	NC_000073.6:+:138455565_138455634	2.16
novel_mir755	399	miRNA	NC_000068.7:-:26350946_26350999	14.14
novel_mir756	157	miRNA	NC_000081.6:+:80349151_80349218	5.56
novel_mir758	21	miRNA	NC_000073.6:-:46105120_46105170	0.74
novel_mir759	160	miRNA	NC_000081.6:-:85554448_85554514	5.67
novel_mir760	27	miRNA	NC_000083.6:+:13321849_13321918	0.96
novel_mir761	38	miRNA	NC_000077.6:-:97832136_97832192	1.35
novel_mir762	13	miRNA	NC_000068.7:-:179818946_179819016	0.46
novel_mir764	259653	miRNA	NC_000070.6:-:132266162_132266216	9201.23
novel_mir767	36	miRNA	NC_000080.6:-:32029946_32029991	1.28
novel_mir768	807	miRNA	NC_000074.6:+:126265787_126265850	28.6
novel_mir769	549	miRNA	NC_000077.6:+:120478734_120478793	19.45
novel_mir770	57	miRNA	NC_000072.6:-:83810077_83810141	2.02
novel_mir767	40	miRNA	NC_000080.6:-:32029973_32030042	1.42
novel_mir772	59	miRNA	NT_095534.1:+:53589_53637	2.09
novel_mir773	532	miRNA	NC_000076.6:-:81345711_81345787	18.85
novel_mir774	15	miRNA	NT_187015.1:+:11889_11939	0.53
novel_mir775	80	miRNA	NC_000079.6:+:118128174_118128226	2.83
novel_mir776	142	miRNA	NC_000076.6:-:69393304_69393375	5.03
novel_mir777	118	miRNA	NC_000077.6:+:85264722_85264802	4.18
novel_mir779	173	miRNA	NC_000080.6:-:31148051_31148109	6.13
novel_mir780	106	miRNA	NC_000073.6:-:16460370_16460413	3.76
novel_mir781	65	miRNA	NC_000085.6:+:10224635_10224729	2.3
novel_mir782	79	miRNA	NC_000083.6:-:32788016_32788073	2.8
novel_mir783	21	miRNA	NC_000069.6:+:37921275_37921344	0.74
novel_mir784	49	miRNA	NC_000077.6:+:78183708_78183754	1.74
novel_mir785	54	miRNA	NC_000076.6:-:70902564_70902649	1.91
novel_mir787	86	miRNA	NC_000070.6:-:82934432_82934499	3.05
novel_mir788	10	miRNA	NC_000067.6:+:131278284_131278329	0.35
novel_mir789	36	miRNA	NC_000083.6:+:79188498_79188547	1.28
novel_mir282	55	miRNA	NC_000076.6:+:80857260_80857325	1.95
novel_mir790	80	miRNA	NC_000083.6:-:29941889_29941964	2.83
novel_mir791	53	miRNA	NC_000077.6:+:97454329_97454386	1.88
novel_mir792	48	miRNA	NC_000085.6:+:5568113_5568154	1.7
novel_mir795	134	miRNA	NC_000068.7:+:26264905_26264966	4.75
novel_mir797	176	miRNA	NC_000075.6:-:44266164_44266244	6.24
novel_mir798	139	miRNA	NC_000071.6:+:120156245_120156318	4.93
novel_mir799	175	miRNA	NC_000079.6:+:4629192_4629256	6.2
novel_mir800	344	miRNA	NC_000083.6:-:44013193_44013231	12.19
novel_mir801	138	miRNA	NC_000072.6:-:125490321_125490384	4.89
novel_mir802	140	miRNA	NC_000071.6:+:56803986_56804049	4.96
novel_mir804	23	miRNA	NC_000083.6:-:27216589_27216625	0.82
novel_mir805	55	miRNA	NC_000077.6:+:120872667_120872730	1.95
novel_mir806	158	miRNA	NC_000076.6:+:8444863_8444906	5.6
novel_mir807	112	miRNA	NC_000067.6:-:14592278_14592344	3.97
novel_mir808	332	miRNA	NC_000081.6:-:75024559_75024629	11.76
novel_mir812	41	miRNA	NC_000068.7:-:116577384_116577431	1.45
novel_mir813	56	miRNA	NC_000074.6:-:119471803_119471865	1.98
novel_mir815	42	miRNA	NC_000082.6:+:70679548_70679608	1.49
novel_mir816	62	miRNA	NC_000072.6:+:108668953_108669019	2.2
novel_mir818	1910	miRNA	NC_000073.6:-:144210548_144210603	67.68
novel_mir819	215	miRNA	NC_000077.6:-:121386678_121386739	7.62
novel_mir820	123	miRNA	NC_000073.6:-:125625300_125625351	4.36
novel_mir822	95	miRNA	NC_000077.6:+:107802348_107802407	3.37
novel_mir823	48	miRNA	NC_000068.7:+:9873945_9874019	1.7
novel_mir825	83	miRNA	NC_000075.6:-:120746497_120746542	2.94
novel_mir826	52	miRNA	NC_000070.6:-:8532592_8532670	1.84
novel_mir829	224	miRNA	NC_000071.6:+:76857812_76857865	7.94
novel_mir830	63	miRNA	NC_000082.6:-:38763188_38763236	2.23
novel_mir831	98	miRNA	NC_000069.6:+:152702197_152702275	3.47
novel_mir832	77	miRNA	NC_000076.6:+:77095241_77095287	2.73
novel_mir833	131	miRNA	NC_000068.7:+:157462529_157462574	4.64
novel_mir835	66	miRNA	NC_000083.6:+:84219416_84219493	2.34
novel_mir836	66	miRNA	NC_000076.6:-:92677853_92677932	2.34
novel_mir837	102	miRNA	NC_000070.6:+:8606486_8606563	3.61
novel_mir840	57	miRNA	NC_000068.7:+:157461186_157461243	2.02
novel_mir841	96	miRNA	NC_000067.6:-:24908377_24908439	3.4
novel_mir842	38	miRNA	NC_000082.6:+:5188152_5188235	1.35
novel_mir843	188	miRNA	NC_000073.6:-:44842151_44842215	6.66
novel_mir846	218	miRNA	NC_000071.6:-:114325599_114325679	7.73
novel_mir847	12	miRNA	NC_000071.6:-:142721329_142721382	0.43
novel_mir849	152	miRNA	NC_000067.6:+:119904942_119905008	5.39
novel_mir851	125	miRNA	NC_000070.6:+:142142533_142142573	4.43
novel_mir853	79	miRNA	NC_000073.6:-:125868381_125868451	2.8
novel_mir854	81	miRNA	NC_000068.7:+:179508972_179509010	2.87
novel_mir855	157	miRNA	NC_000075.6:-:108079010_108079083	5.56
novel_mir857	102	miRNA	NC_000068.7:-:118066151_118066220	3.61
novel_mir315	94	miRNA	NC_000078.6:+:80575609_80575681	3.33
novel_mir859	57	miRNA	NC_000070.6:+:107179298_107179344	2.02
novel_mir861	211	miRNA	NC_000077.6:-:100794289_100794393	7.48
novel_mir863	138	miRNA	NC_000077.6:+:64599366_64599407	4.89
novel_mir864	132	miRNA	NT_187027.1:+:1225999_1226047	4.68
novel_mir865	49	miRNA	NC_000074.6:+:123427437_123427497	1.74
novel_mir866	77	miRNA	NC_000068.7:+:153740617_153740697	2.73
novel_mir227	319	miRNA	NC_000070.6:-:135634617_135634666	11.3
novel_mir867	107	miRNA	NC_000074.6:-:118786835_118786881	3.79
novel_mir868	36	miRNA	NC_000081.6:-:31341532_31341575	1.28
novel_mir771	33	miRNA	NC_000081.6:+:26120413_26120497	1.17
novel_mir869	231	miRNA	NC_000072.6:-:89438643_89438723	8.19
novel_mir870	80	miRNA	NT_187023.1:-:1254037_1254083	2.83
novel_mir871	88	miRNA	NC_000083.6:+:26379407_26379495	3.12
novel_mir51	38	miRNA	NC_000083.6:+:49572137_49572197	1.35
novel_mir873	79	miRNA	NC_000083.6:-:30523568_30523660	2.8
novel_mir874	43	miRNA	NC_000067.6:+:181154064_181154138	1.52
novel_mir875	43	miRNA	NC_000085.6:+:53621131_53621180	1.52
novel_mir878	94	miRNA	NC_000069.6:+:51521758_51521796	3.33
novel_mir879	184	miRNA	NC_000072.6:+:72773361_72773444	6.52
novel_mir881	54	miRNA	NC_000076.6:+:90689065_90689114	1.91
novel_mir882	18	miRNA	NC_000079.6:-:10374331_10374402	0.64
novel_mir883	73	miRNA	NC_000074.6:-:128549916_128549957	2.59
novel_mir257	11	miRNA	NC_000068.7:+:172830497_172830543	0.39
novel_mir884	85	miRNA	NC_000067.6:+:34035600_34035671	3.01
novel_mir886	42	miRNA	NC_000079.6:+:85626849_85626929	1.49
novel_mir889	24	miRNA	NC_000072.6:-:138168798_138168865	0.85
novel_mir890	99	miRNA	NC_000079.6:-:75069122_75069189	3.51
novel_mir891	35	miRNA	NC_000085.6:+:34252603_34252679	1.24
novel_mir895	523	miRNA	NC_000075.6:-:76026100_76026170	18.53
novel_mir896	21	miRNA	NC_000071.6:+:134675881_134675943	0.74
novel_mir897	47	miRNA	NC_000069.6:-:107617417_107617492	1.67
novel_mir898	138	miRNA	NC_000067.6:-:4134715_4134786	4.89
novel_mir899	69	miRNA	NC_000071.6:+:129460913_129460990	2.45
novel_mir227	204	miRNA	NC_000073.6:-:35409644_35409703	7.23
novel_mir900	47	miRNA	NC_000075.6:-:21960610_21960672	1.67
novel_mir901	88	miRNA	NC_000074.6:+:13350569_13350631	3.12
novel_mir903	37	miRNA	NC_000077.6:-:98704208_98704287	1.31
novel_mir905	348	miRNA	NC_000086.7:+:101522533_101522603	12.33
novel_mir906	123	miRNA	NC_000067.6:+:132130697_132130781	4.36
novel_mir908	31	miRNA	NC_000079.6:-:34479004_34479043	1.1
novel_mir911	72	miRNA	NC_000072.6:+:99919775_99919841	2.55
novel_mir912	42	miRNA	NC_000068.7:-:173564818_173564864	1.49
novel_mir913	90	miRNA	NC_000078.6:+:106262465_106262548	3.19
novel_mir914	106	miRNA	NC_000079.6:-:90061724_90061824	3.76
novel_mir861	62	miRNA	NC_000073.6:-:28746063_28746113	2.2
novel_mir916	28	miRNA	NC_000067.6:-:63994402_63994469	0.99
novel_mir917	105	miRNA	NC_000076.6:-:24217004_24217089	3.72
novel_mir918	83	miRNA	NC_000076.6:-:74986773_74986845	2.94
novel_mir919	41	miRNA	NC_000077.6:+:115430732_115430782	1.45
novel_mir920	25	miRNA	NC_000075.6:+:109029280_109029330	0.89
novel_mir921	36	miRNA	NC_000078.6:-:16731542_16731633	1.28
novel_mir901	41	miRNA	NC_000074.6:+:13350611_13350665	1.45
novel_mir926	29	miRNA	NC_000067.6:+:118676607_118676661	1.03
novel_mir168	51	miRNA	NC_000075.6:+:107627252_107627338	1.81
novel_mir928	111	miRNA	NC_000085.6:+:49022493_49022544	3.93
novel_mir929	90	miRNA	NC_000074.6:-:12872235_12872293	3.19
novel_mir931	45	miRNA	NC_000073.6:-:35201251_35201324	1.59
novel_mir934	39	miRNA	NC_000081.6:+:73192568_73192645	1.38
novel_mir935	47	miRNA	NC_000078.6:-:87866088_87866153	1.67
novel_mir936	65	miRNA	NC_000075.6:-:15438867_15438924	2.3
novel_mir937	39	miRNA	NC_000075.6:-:47102430_47102501	1.38
novel_mir939	36	miRNA	NC_000077.6:-:54704154_54704216	1.28
novel_mir940	102	miRNA	NC_000074.6:+:110178736_110178787	3.61
novel_mir941	218	miRNA	NC_000076.6:+:67245266_67245323	7.73
novel_mir943	54	miRNA	NC_000077.6:+:27825563_27825636	1.91
novel_mir944	110	miRNA	NC_000078.6:+:105762199_105762279	3.9
novel_mir945	99	miRNA	NC_000070.6:+:55931199_55931260	3.51
novel_mir948	64	miRNA	NC_000077.6:-:60924986_60925068	2.27
novel_mir952	99	miRNA	NC_000071.6:+:28400485_28400555	3.51
novel_mir953	65	miRNA	NC_000067.6:-:55646073_55646152	2.3
novel_mir955	53	miRNA	NC_000074.6:+:122039927_122039978	1.88
novel_mir956	256	miRNA	NC_000072.6:+:135949253_135949300	9.07
novel_mir959	51	miRNA	NC_000080.6:+:47064451_47064530	1.81
novel_mir961	54	miRNA	NC_000070.6:+:43703307_43703365	1.91
novel_mir962	105	miRNA	NC_000071.6:-:137126892_137126966	3.72
novel_mir963	154	miRNA	NC_000077.6:-:4276340_4276389	5.46
novel_mir964	51	miRNA	NC_000069.6:-:104754993_104755041	1.81
novel_mir967	79	miRNA	NC_000067.6:+:179596312_179596365	2.8
novel_mir969	345	miRNA	NC_000074.6:-:119407582_119407634	12.23
novel_mir971	55	miRNA	NC_000080.6:+:101327686_101327755	1.95
novel_mir972	117	miRNA	NC_000076.6:-:61168681_61168735	4.15
novel_mir973	103	miRNA	NC_000082.6:-:62854163_62854224	3.65
novel_mir975	401	miRNA	NC_000070.6:+:126497507_126497587	14.21
novel_mir976	63	miRNA	NC_000073.6:-:121121883_121121942	2.23
novel_mir978	128	miRNA	NC_000068.7:-:166147192_166147250	4.54
novel_mir979	57	miRNA	NC_000074.6:+:103087369_103087434	2.02
novel_mir980	58	miRNA	NC_000070.6:-:43444186_43444239	2.06
novel_mir981	28	miRNA	NC_000076.6:+:67490466_67490515	0.99
novel_mir983	33	miRNA	NC_000071.6:-:77746729_77746767	1.17
novel_mir984	1209	miRNA	NC_000073.6:-:55689411_55689471	42.84
novel_mir986	105	miRNA	NC_000078.6:-:87076191_87076251	3.72
novel_mir989	136	miRNA	NC_000074.6:-:86529042_86529093	4.82
novel_mir990	108	miRNA	NC_000074.6:-:56814126_56814204	3.83
novel_mir994	61	miRNA	NC_000078.6:+:76245084_76245144	2.16
novel_mir997	45	miRNA	NC_000084.6:-:37855744_37855810	1.59
novel_mir998	137	miRNA	NC_000079.6:-:48952965_48953031	4.85
novel_mir999	120	miRNA	NC_000079.6:+:40558279_40558349	4.25
novel_mir1000	95	miRNA	NC_000075.6:+:65098783_65098840	3.37
novel_mir1001	67	miRNA	NC_000068.7:-:181202249_181202326	2.37
novel_mir1002	40	miRNA	NC_000068.7:+:36024737_36024786	1.42
novel_mir1004	514	miRNA	NC_000078.6:-:100088854_100088926	18.21
novel_mir519	38	miRNA	NT_187003.1:-:1693278_1693346	1.35
novel_mir1005	161	miRNA	NC_000076.6:+:24173467_24173520	5.71
novel_mir1007	110	miRNA	NC_000082.6:+:32414964_32415041	3.9
novel_mir1009	151	miRNA	NC_000068.7:+:25625360_25625435	5.35
novel_mir1010	13	miRNA	NC_000071.6:+:114388297_114388362	0.46
novel_mir1011	300	miRNA	NC_000084.6:-:11143524_11143583	10.63
novel_mir1012	12	miRNA	NC_000075.6:+:23445929_23445978	0.43
novel_mir1013	116	miRNA	NT_187027.1:-:1270585_1270645	4.11
novel_mir1016	139	miRNA	NC_000072.6:-:32976401_32976461	4.93
novel_mir1017	28	miRNA	NC_000073.6:-:99356160_99356201	0.99
novel_mir1020	54	miRNA	NC_000072.6:-:113182248_113182297	1.91
novel_mir1021	12	miRNA	NC_000085.6:-:8896188_8896255	0.43
novel_mir1023	208	miRNA	NC_000072.6:+:73084653_73084696	7.37
novel_mir1025	87	miRNA	NC_000084.6:+:42800815_42800882	3.08
novel_mir1027	29	miRNA	NC_000077.6:+:114560639_114560709	1.03
novel_mir1028	51	miRNA	NC_000075.6:+:13898558_13898641	1.81
novel_mir1030	61	miRNA	NC_000077.6:+:11967536_11967586	2.16
novel_mir1032	325	miRNA	NC_000085.6:-:36941962_36942011	11.52
novel_mir1034	154	miRNA	NC_000077.6:+:57564081_57564154	5.46
novel_mir1036	234	miRNA	NC_000086.7:-:127790359_127790429	8.29
novel_mir1037	130	miRNA	NC_000081.6:-:75802608_75802698	4.61
novel_mir1038	47	miRNA	NC_000067.6:+:113710012_113710066	1.67
novel_mir1039	253	miRNA	NC_000077.6:+:16508311_16508360	8.97
novel_mir1042	76	miRNA	NC_000083.6:-:68571979_68572049	2.69
novel_mir1047	48	miRNA	NC_000077.6:-:5998461_5998505	1.7
novel_mir1049	174	miRNA	NC_000082.6:-:93351804_93351877	6.17
novel_mir1050	85	miRNA	NC_000075.6:+:34745931_34746010	3.01
novel_mir1051	270	miRNA	NC_000086.7:+:169106320_169106392	9.57
novel_mir174	22	miRNA	NC_000071.6:-:99728558_99728632	0.78
novel_mir1052	90	miRNA	NC_000070.6:+:13416203_13416274	3.19
novel_mir1053	254	miRNA	NC_000071.6:+:52676141_52676192	9
novel_mir1054	12	miRNA	NC_000076.6:+:62556212_62556286	0.43
novel_mir1055	83	miRNA	NC_000080.6:-:47548383_47548441	2.94
novel_mir1058	31	miRNA	NC_000086.7:+:52278409_52278479	1.1
novel_mir1062	107	miRNA	NC_000086.7:-:118296696_118296752	3.79
novel_mir1063	39	miRNA	NC_000071.6:-:27069043_27069101	1.38
novel_mir227	18	miRNA	NW_012132911.1:+:64920_64968	0.64
novel_mir1067	126	miRNA	NC_000071.6:-:34332224_34332302	4.47
novel_mir1068	18	miRNA	NC_000073.6:-:40944632_40944709	0.64
novel_mir1069	147	miRNA	NC_000075.6:+:22126369_22126442	5.21
novel_mir1070	39	miRNA	NC_000067.6:-:170523918_170523967	1.38
novel_mir1072	47	miRNA	NC_000072.6:+:88807982_88808052	1.67
novel_mir1073	64	miRNA	NC_000071.6:+:120318487_120318534	2.27
novel_mir1074	42	miRNA	NC_000076.6:-:127084952_127085016	1.49
novel_mir1075	79	miRNA	NC_000068.7:-:92497958_92498044	2.8
novel_mir1077	71	miRNA	NC_000068.7:+:104574868_104574924	2.52
novel_mir1079	118	miRNA	NC_000081.6:-:72645421_72645502	4.18
novel_mir1080	81	miRNA	NC_000068.7:-:157069311_157069384	2.87
novel_mir1081	78	miRNA	NC_000068.7:+:127595690_127595759	2.76
novel_mir1082	24	miRNA	NC_000068.7:+:169498527_169498575	0.85
novel_mir1085	61	miRNA	NC_000083.6:+:66703455_66703546	2.16
novel_mir1086	2570	miRNA	NC_000085.6:-:46319638_46319697	91.07
novel_mir1087	105	miRNA	NC_000077.6:+:120285575_120285643	3.72
novel_mir1088	66	miRNA	NC_000072.6:+:32017991_32018052	2.34
novel_mir1090	15	miRNA	NC_000072.6:-:101278593_101278639	0.53
novel_mir1091	59	miRNA	NC_000082.6:-:4788439_4788487	2.09
novel_mir1092	48	miRNA	NC_000077.6:+:119426593_119426660	1.7
novel_mir1094	390	miRNA	NC_000073.6:-:125451652_125451706	13.82
novel_mir1096	49	miRNA	NC_000081.6:+:91459221_91459289	1.74
novel_mir1097	168	miRNA	NC_000067.6:+:35523534_35523607	5.95
novel_mir1098	46	miRNA	NC_000070.6:+:138272414_138272487	1.63
novel_mir1099	51	miRNA	NC_000078.6:+:24793394_24793475	1.81
novel_mir1101	120	miRNA	NC_000084.6:-:78740467_78740547	4.25
novel_mir1102	51	miRNA	NC_000072.6:+:101250225_101250269	1.81
novel_mir958	39	miRNA	NC_000073.6:+:112023076_112023147	1.38
novel_mir1106	77	miRNA	NC_000067.6:-:164936279_164936315	2.73
novel_mir1107	105	miRNA	NC_000084.6:+:45140527_45140608	3.72
novel_mir1110	140	miRNA	NC_000067.6:+:188524683_188524745	4.96
novel_mir1111	42	miRNA	NC_000069.6:-:67374140_67374200	1.49
novel_mir1113	79	miRNA	NC_000081.6:+:79934284_79934345	2.8
novel_mir1114	96	miRNA	NC_000074.6:-:118341268_118341361	3.4
novel_mir1115	108	miRNA	NC_000067.6:-:42658196_42658246	3.83
novel_mir1116	68	miRNA	NC_000070.6:-:137309114_137309201	2.41
novel_mir1117	39	miRNA	NC_000070.6:-:138242330_138242422	1.38
novel_mir1118	50	miRNA	NC_000083.6:-:25079257_25079316	1.77
novel_mir1120	170	miRNA	NC_000077.6:-:119543505_119543564	6.02
novel_mir1121	36	miRNA	NC_000068.7:+:172577117_172577177	1.28
novel_mir1124	74	miRNA	NC_000081.6:+:83836514_83836556	2.62
novel_mir1125	369	miRNA	NC_000081.6:-:36506040_36506113	13.08
novel_mir1128	77	miRNA	NC_000068.7:+:57700426_57700515	2.73
novel_mir1129	881	miRNA	NC_000068.7:-:4063424_4063514	31.22
novel_mir1130	52	miRNA	NC_000072.6:+:32821012_32821080	1.84
novel_mir905	461	miRNA	NC_000086.7:+:101522578_101522643	16.34
novel_mir1132	45	miRNA	NC_000077.6:+:78202948_78203006	1.59
novel_mir1133	118	miRNA	NC_000077.6:+:94942817_94942889	4.18
novel_mir1137	57	miRNA	NC_000076.6:+:41673805_41673844	2.02
novel_mir1138	25	miRNA	NC_000083.6:-:42671369_42671451	0.89
novel_mir1142	69	miRNA	NC_000083.6:-:6165579_6165644	2.45
novel_mir1143	56	miRNA	NC_000073.6:-:127599927_127599965	1.98
novel_mir1145	138	miRNA	NC_000084.6:+:21343669_21343742	4.89
novel_mir1148	78	miRNA	NC_000083.6:-:91204114_91204164	2.76
novel_mir1150	861	miRNA	NC_000079.6:-:73470659_73470735	30.51
novel_mir1151	37	miRNA	NC_000068.7:+:107399682_107399769	1.31
novel_mir1152	174	miRNA	NC_000067.6:-:84037591_84037645	6.17
novel_mir1154	59	miRNA	NC_000079.6:+:96242342_96242407	2.09
novel_mir1155	36	miRNA	NC_000076.6:-:31772824_31772881	1.28
novel_mir1156	176	miRNA	NC_000070.6:-:134222506_134222585	6.24
novel_mir1157	47	miRNA	NC_000085.6:-:11249872_11249941	1.67
novel_mir1158	319	miRNA	NC_000073.6:+:29802466_29802550	11.3
novel_mir1160	59	miRNA	NC_000069.6:+:107159414_107159476	2.09
novel_mir1161	45	miRNA	NC_000070.6:+:119952952_119953008	1.59
novel_mir1162	11	miRNA	NC_000081.6:-:99685119_99685171	0.39
novel_mir1164	108	miRNA	NC_000074.6:+:121877420_121877466	3.83
novel_mir1166	240	miRNA	NC_000072.6:+:60414914_60414980	8.5
novel_mir1169	80	miRNA	NT_039634.4:-:1331376_1331429	2.83
novel_mir1171	334	miRNA	NC_000074.6:-:121109557_121109614	11.84
novel_mir1174	13	miRNA	NC_000069.6:+:27401636_27401703	0.46
novel_mir1176	172	miRNA	NC_000073.6:+:79744777_79744843	6.1
novel_mir1177	71	miRNA	NC_000081.6:-:98904919_98904966	2.52
novel_mir858	101	miRNA	NC_000070.6:+:100095844_100095929	3.58
novel_mir332	102	miRNA	NC_000070.6:+:12342414_12342493	3.61
novel_mir1178	213	miRNA	NC_000079.6:-:113691771_113691845	7.55
novel_mir1180	20	miRNA	NC_000067.6:-:63767118_63767168	0.71
novel_mir1051	59	miRNA	NC_000086.7:+:169106371_169106446	2.09
novel_mir1181	24	miRNA	NC_000069.6:-:103920700_103920765	0.85
novel_mir1183	189	miRNA	NC_000084.6:+:74594891_74594955	6.7
novel_mir1184	69	miRNA	NC_000083.6:+:83875991_83876033	2.45
novel_mir1185	74	miRNA	NC_000080.6:+:33856817_33856890	2.62
novel_mir1186	46	miRNA	NC_000079.6:-:64184658_64184717	1.63
novel_mir1188	58	miRNA	NC_000077.6:+:98204366_98204416	2.06
novel_mir1189	50	miRNA	NC_000081.6:+:85037796_85037850	1.77
novel_mir1191	88	miRNA	NC_000083.6:+:29058581_29058651	3.12
novel_mir1194	58	miRNA	NC_000070.6:-:126722999_126723058	2.06
novel_mir1195	57	miRNA	NC_000086.7:-:117578867_117578909	2.02
novel_mir1196	117	miRNA	NC_000076.6:-:117429865_117429923	4.15
novel_mir1197	84	miRNA	NC_000068.7:-:157750552_157750617	2.98
novel_mir1198	436	miRNA	NC_000075.6:-:49122344_49122383	15.45
novel_mir1200	107	miRNA	NC_000073.6:-:40894196_40894262	3.79
novel_mir1201	11	miRNA	NC_000079.6:+:57361548_57361617	0.39
novel_mir1202	42	miRNA	NC_000080.6:-:121323878_121323961	1.49
novel_mir1203	216	miRNA	NC_000068.7:-:168637240_168637283	7.65
novel_mir1204	258	miRNA	NC_000067.6:+:41072009_41072084	9.14
novel_mir1206	68	miRNA	NC_000076.6:+:118386961_118387052	2.41
novel_mir1208	182	miRNA	NC_000071.6:+:114004855_114004913	6.45
novel_mir1210	48	miRNA	NC_000084.6:+:74502694_74502753	1.7
novel_mir1211	21153	miRNA	NC_000076.6:-:43412389_43412491	749.59
novel_mir1212	160	miRNA	NC_000072.6:-:81452979_81453048	5.67
novel_mir1213	16	miRNA	NC_000076.6:+:117605279_117605354	0.57
novel_mir1214	34	miRNA	NC_000073.6:-:107382914_107382977	1.2
novel_mir993	28	miRNA	NC_000076.6:+:84096603_84096674	0.99
novel_mir495	79	miRNA	NC_000071.6:+:113907022_113907108	2.8
novel_mir1216	25	miRNA	NC_000079.6:-:113628974_113629050	0.89
novel_mir1218	125	miRNA	NC_000075.6:+:45944253_45944323	4.43
novel_mir1221	148	miRNA	NC_000069.6:+:101455663_101455726	5.24
novel_mir1222	49	miRNA	NC_000071.6:-:60344972_60345028	1.74
novel_mir1224	31	miRNA	NC_000068.7:-:118462912_118462973	1.1
novel_mir1225	35	miRNA	NC_000068.7:+:120036608_120036679	1.24
novel_mir1226	16	miRNA	NC_000071.6:-:140654143_140654217	0.57
novel_mir227	215	miRNA	NC_000073.6:-:30751324_30751387	7.62
novel_mir1229	36	miRNA	NC_000067.6:-:90906939_90907018	1.28
novel_mir1230	30	miRNA	NC_000074.6:-:14958146_14958224	1.06
novel_mir1235	98	miRNA	NC_000069.6:-:7498653_7498706	3.47
novel_mir1239	40	miRNA	NC_000080.6:+:89263332_89263416	1.42
novel_mir1240	60	miRNA	NC_000077.6:-:59425655_59425713	2.13
novel_mir1241	70	miRNA	NC_000067.6:-:20557806_20557873	2.48
novel_mir1242	158	miRNA	NC_000072.6:+:93410002_93410054	5.6
novel_mir1244	128	miRNA	NC_000068.7:-:157180254_157180325	4.54
novel_mir1245	190	miRNA	NC_000082.6:+:35404643_35404707	6.73
novel_mir1246	95	miRNA	NC_000078.6:+:87098435_87098502	3.37
novel_mir1247	29	miRNA	NC_000073.6:+:145035113_145035155	1.03
novel_mir1249	78	miRNA	NC_000068.7:-:3662014_3662067	2.76
novel_mir1252	139	miRNA	NC_000086.7:+:57985168_57985256	4.93
novel_mir1254	77	miRNA	NC_000077.6:-:98930764_98930813	2.73
novel_mir1255	51	miRNA	NC_000069.6:-:130404699_130404751	1.81
novel_mir1257	40	miRNA	NC_000086.7:+:70185891_70185943	1.42
novel_mir1259	37	miRNA	NC_000075.6:-:62939212_62939277	1.31
novel_mir1260	57	miRNA	NC_000078.6:+:25215496_25215570	2.02
novel_mir1261	24	miRNA	NC_000080.6:+:43706397_43706464	0.85
novel_mir1262	56	miRNA	NC_000085.6:-:46645139_46645180	1.98
novel_mir1263	90	miRNA	NC_000076.6:+:13089096_13089152	3.19
novel_mir1264	44	miRNA	NC_000068.7:-:155673473_155673559	1.56
novel_mir1265	85	miRNA	NC_000083.6:+:26579794_26579851	3.01
novel_mir1266	42	miRNA	NC_000069.6:+:127646567_127646623	1.49
novel_mir1267	91	miRNA	NC_000075.6:-:117042198_117042249	3.22
novel_mir1269	100	miRNA	NC_000074.6:-:31105812_31105879	3.54
novel_mir1271	123	miRNA	NC_000069.6:-:127748909_127748979	4.36
novel_mir1273	47	miRNA	NC_000081.6:+:30920320_30920372	1.67
novel_mir1274	60	miRNA	NC_000067.6:+:12639468_12639525	2.13
novel_mir1276	47	miRNA	NC_000067.6:-:59284709_59284796	1.67
novel_mir1277	76	miRNA	NC_000082.6:-:31876478_31876553	2.69
novel_mir1278	200	miRNA	NC_000080.6:-:64557718_64557784	7.09
novel_mir1281	134	miRNA	NC_000077.6:-:110385167_110385235	4.75
novel_mir1282	1978	miRNA	NC_000084.6:-:5602308_5602382	70.09
novel_mir1284	68	miRNA	NC_000076.6:-:43984876_43984927	2.41
novel_mir1285	176	miRNA	NC_000080.6:+:62488725_62488777	6.24
novel_mir1286	53	miRNA	NC_000075.6:-:107681411_107681490	1.88
novel_mir1287	72	miRNA	NC_000079.6:-:40133630_40133691	2.55
novel_mir1289	34	miRNA	NC_000070.6:+:101420626_101420670	1.2
novel_mir1290	31	miRNA	NC_000070.6:-:150767093_150767140	1.1
novel_mir1294	114	miRNA	NC_000086.7:+:150565091_150565173	4.04
novel_mir1300	58	miRNA	NC_000081.6:+:37307740_37307797	2.06
novel_mir1301	51	miRNA	NC_000082.6:-:20508164_20508229	1.81
novel_mir1303	319	miRNA	NC_000072.6:+:73610204_73610271	11.3
novel_mir1304	110	miRNA	NC_000068.7:-:154806275_154806353	3.9
novel_mir1305	40	miRNA	NC_000072.6:-:122718393_122718448	1.42
novel_mir1306	37	miRNA	NC_000067.6:+:24176270_24176344	1.31
novel_mir1307	124	miRNA	NC_000076.6:-:45363484_45363545	4.39
novel_mir1308	110	miRNA	NC_000076.6:+:7334749_7334813	3.9
novel_mir1311	146	miRNA	NC_000073.6:-:30699751_30699787	5.17
novel_mir1312	124	miRNA	NC_000069.6:-:109019806_109019875	4.39
novel_mir1313	67	miRNA	NC_000067.6:-:154189051_154189121	2.37
novel_mir1314	83	miRNA	NC_000077.6:-:115780615_115780684	2.94
novel_mir1317	51	miRNA	NC_000069.6:-:37987591_37987666	1.81
novel_mir1318	112	miRNA	NC_000071.6:-:74861491_74861559	3.97
novel_mir1321	141	miRNA	NC_000075.6:-:120430094_120430137	5
novel_mir1322	282	miRNA	NC_000067.6:-:75031273_75031354	9.99
novel_mir1323	90	miRNA	NC_000077.6:-:99284800_99284867	3.19
novel_mir1325	83	miRNA	NC_000068.7:+:6319146_6319209	2.94
novel_mir1327	94	miRNA	NC_000067.6:+:132975789_132975861	3.33
novel_mir1328	79	miRNA	NC_000082.6:-:87490025_87490078	2.8
novel_mir1332	25	miRNA	NC_000079.6:-:39782213_39782286	0.89
novel_mir1333	18	miRNA	NC_000071.6:+:12667145_12667213	0.64
novel_mir1336	91	miRNA	NC_000081.6:-:74564805_74564885	3.22
novel_mir1338	55	miRNA	NC_000076.6:-:33413781_33413854	1.95
novel_mir1339	30	miRNA	NC_000075.6:-:110390188_110390252	1.06
novel_mir1340	96	miRNA	NC_000080.6:+:62041337_62041393	3.4
novel_mir1341	73	miRNA	NC_000081.6:+:101552880_101552937	2.59
novel_mir1342	108	miRNA	NC_000080.6:-:104592831_104592897	3.83
novel_mir1343	30	miRNA	NC_000074.6:-:26983678_26983742	1.06
novel_mir1344	84	miRNA	NC_000075.6:-:20859656_20859726	2.98
novel_mir1345	36	miRNA	NC_000086.7:-:8125400_8125477	1.28
novel_mir1346	114	miRNA	NC_000071.6:+:139865754_139865817	4.04
novel_mir1348	133	miRNA	NC_000076.6:-:41578194_41578252	4.71
novel_mir1349	166	miRNA	NC_000074.6:-:24261120_24261196	5.88
novel_mir1350	188	miRNA	NC_000070.6:+:125404011_125404100	6.66
novel_mir1351	318	miRNA	NC_000068.7:-:146428224_146428310	11.27
novel_mir1352	309	miRNA	NC_000072.6:+:147604643_147604718	10.95
novel_mir1353	86	miRNA	NC_000083.6:+:13663899_13663946	3.05
novel_mir1357	44	miRNA	NC_000075.6:-:117264302_117264349	1.56
novel_mir1358	27	miRNA	NC_000067.6:-:36119703_36119757	0.96
novel_mir1359	877	miRNA	NC_000084.6:-:26874268_26874351	31.08
novel_mir1360	380	miRNA	NC_000081.6:+:96743550_96743627	13.47
novel_mir1361	41	miRNA	NC_000072.6:+:119360324_119360397	1.45
novel_mir1362	42	miRNA	NC_000070.6:+:24724266_24724342	1.49
novel_mir1363	46	miRNA	NC_000070.6:+:63740136_63740204	1.63
novel_mir1364	77	miRNA	NC_000069.6:-:89271449_89271496	2.73
novel_mir1366	61	miRNA	NC_000083.6:-:4439339_4439410	2.16
novel_mir1367	151	miRNA	NC_000076.6:-:77183719_77183792	5.35
novel_mir1368	824	miRNA	NC_000073.6:-:136790436_136790483	29.2
novel_mir1370	580	miRNA	NC_000081.6:+:46464860_46464912	20.55
novel_mir1371	316	miRNA	NC_000072.6:+:85892963_85893036	11.2
novel_mir1372	48	miRNA	NC_000075.6:-:56401873_56401959	1.7
novel_mir1375	85	miRNA	NC_000083.6:+:17063970_17064051	3.01
novel_mir1377	156	miRNA	NC_000077.6:-:69226435_69226499	5.53
novel_mir1378	99	miRNA	NC_000071.6:+:144827955_144827993	3.51
novel_mir1380	420	miRNA	NC_000070.6:+:127984683_127984746	14.88
novel_mir1381	175	miRNA	NC_000086.7:+:102805139_102805203	6.2
novel_mir1384	198	miRNA	NC_000073.6:+:44907766_44907811	7.02
novel_mir1385	69	miRNA	NC_000072.6:+:84123266_84123321	2.45
novel_mir1388	37	miRNA	NC_000078.6:+:109708193_109708244	1.31
novel_mir1349	32	miRNA	NC_000074.6:-:24261176_24261221	1.13
novel_mir1389	249	miRNA	NC_000081.6:+:18806681_18806768	8.82
novel_mir1390	139	miRNA	NC_000082.6:-:87494270_87494322	4.93
novel_mir1391	135	miRNA	NC_000073.6:-:67139171_67139238	4.78
novel_mir1393	94	miRNA	NC_000072.6:+:89389377_89389455	3.33
novel_mir1394	42	miRNA	NC_000073.6:+:127877322_127877380	1.49
novel_mir1396	139	miRNA	NC_000069.6:-:38661797_38661872	4.93
novel_mir1399	55	miRNA	NC_000077.6:-:71986464_71986533	1.95
novel_mir1400	76	miRNA	NC_000075.6:+:30844155_30844201	2.69
novel_mir1401	56	miRNA	NC_000068.7:+:158815140_158815190	1.98
novel_mir1402	66	miRNA	NC_000073.6:-:112546033_112546098	2.34
novel_mir1403	144	miRNA	NC_000072.6:-:101114298_101114354	5.1
novel_mir1404	43	miRNA	NT_114985.3:-:1548728_1548801	1.52
novel_mir1405	166	miRNA	NC_000075.6:+:108405905_108405958	5.88
novel_mir1407	187	miRNA	NC_000081.6:+:58075574_58075660	6.63
novel_mir1408	108	miRNA	NC_000079.6:-:13845266_13845329	3.83
novel_mir573	51	miRNA	NC_000077.6:-:5559291_5559325	1.81
novel_mir1409	71	miRNA	NC_000084.6:-:81820915_81820967	2.52
novel_mir1411	12	miRNA	NC_000079.6:-:63680229_63680308	0.43
novel_mir1413	137	miRNA	NC_000076.6:-:106474712_106474788	4.85
novel_mir1414	81	miRNA	NC_000083.6:+:35514712_35514759	2.87
novel_mir1415	157	miRNA	NC_000068.7:+:141231099_141231186	5.56
novel_mir1417	55	miRNA	NC_000067.6:-:170148288_170148352	1.95
novel_mir1418	40	miRNA	NC_000073.6:+:137783918_137784001	1.42
novel_mir1419	48	miRNA	NC_000078.6:-:4088503_4088567	1.7
novel_mir1421	45	miRNA	NC_000077.6:+:52075416_52075479	1.59
novel_mir1423	15	miRNA	NC_000070.6:+:135054602_135054654	0.53
novel_mir1425	127	miRNA	NC_000077.6:-:69609620_69609679	4.5
novel_mir1426	70	miRNA	NC_000085.6:-:58673240_58673283	2.48
novel_mir1427	128	miRNA	NC_000072.6:+:28501079_28501137	4.54
novel_mir1428	45	miRNA	NC_000068.7:-:6389131_6389210	1.59
novel_mir1430	50	miRNA	NC_000078.6:-:86059306_86059358	1.77
novel_mir1431	540	miRNA	NC_000084.6:+:62347452_62347512	19.14
novel_mir1432	26	miRNA	NC_000070.6:-:85419112_85419156	0.92
novel_mir1434	84	miRNA	NC_000079.6:-:27801892_27801962	2.98
novel_mir1435	155	miRNA	NC_000081.6:+:90225680_90225747	5.49
novel_mir1436	44	miRNA	NC_000073.6:+:131948242_131948317	1.56
novel_mir1437	49	miRNA	NC_000083.6:-:92627882_92627972	1.74
novel_mir1439	107	miRNA	NC_000070.6:-:85491168_85491230	3.79
novel_mir1440	38	miRNA	NC_000078.6:-:84651105_84651193	1.35
novel_mir1443	74	miRNA	NC_000083.6:+:45772919_45772993	2.62
novel_mir1445	223	miRNA	NC_000070.6:-:32964106_32964190	7.9
novel_mir1447	200	miRNA	NC_000079.6:+:73776410_73776474	7.09
novel_mir1448	133	miRNA	NC_000071.6:-:140567785_140567830	4.71
novel_mir1449	71	miRNA	NC_000082.6:-:29978077_29978122	2.52
novel_mir1451	31	miRNA	NC_000077.6:-:106350527_106350578	1.1
novel_mir1452	98	miRNA	NC_000084.6:-:39164068_39164135	3.47
novel_mir1456	87	miRNA	NC_000076.6:-:127312380_127312443	3.08
novel_mir1457	61	miRNA	NC_000073.6:+:127312032_127312086	2.16
novel_mir1458	69	miRNA	NC_000068.7:-:27270265_27270340	2.45
novel_mir1460	49	miRNA	NC_000077.6:-:4234832_4234892	1.74
novel_mir1461	69	miRNA	NC_000080.6:+:14093231_14093290	2.45
novel_mir1464	23	miRNA	NC_000082.6:+:95536003_95536084	0.82
novel_mir1465	62	miRNA	NC_000080.6:-:67638447_67638507	2.2
novel_mir1466	104	miRNA	NC_000073.6:+:96797287_96797356	3.69
novel_mir1467	39	miRNA	NC_000074.6:+:109397245_109397301	1.38
novel_mir1468	134	miRNA	NC_000068.7:-:167868946_167868999	4.75
novel_mir1469	63	miRNA	NC_000070.6:-:127227072_127227136	2.23
novel_mir1471	34	miRNA	NC_000078.6:+:15959380_15959450	1.2
novel_mir1473	38	miRNA	NC_000083.6:+:71740848_71740890	1.35
novel_mir1475	29	miRNA	NC_000069.6:+:7803385_7803446	1.03
novel_mir1478	62	miRNA	NC_000068.7:+:156411524_156411577	2.2
novel_mir1479	38	miRNA	NC_000069.6:+:131090550_131090637	1.35
novel_mir1480	70	miRNA	NC_000075.6:+:8210430_8210506	2.48
novel_mir1482	120	miRNA	NC_000074.6:-:124053229_124053273	4.25
novel_mir1485	63	miRNA	NC_000068.7:-:75021724_75021772	2.23
novel_mir1486	35	miRNA	NC_000077.6:+:25640573_25640664	1.24
novel_mir1487	41	miRNA	NC_000079.6:+:57592470_57592525	1.45
novel_mir1489	112	miRNA	NC_000079.6:+:13687635_13687725	3.97
novel_mir1490	63	miRNA	NC_000082.6:-:10770958_10771005	2.23
novel_mir1491	48	miRNA	NC_000074.6:-:117410523_117410589	1.7
novel_mir448	186	miRNA	NC_000070.6:+:151956541_151956624	6.59
novel_mir1492	49	miRNA	NC_000077.6:-:102461677_102461767	1.74
novel_mir1494	30	miRNA	NC_000068.7:+:173717569_173717620	1.06
novel_mir1495	132	miRNA	NC_000068.7:-:32421147_32421216	4.68
novel_mir1496	51	miRNA	NC_000067.6:+:88398029_88398097	1.81
novel_mir1497	135	miRNA	NC_000086.7:-:14615739_14615824	4.78
novel_mir1499	22	miRNA	NC_000080.6:+:48019403_48019492	0.78
novel_mir1500	47	miRNA	NC_000077.6:+:85923572_85923654	1.67
novel_mir1501	49	miRNA	NC_000080.6:+:26815882_26815958	1.74
novel_mir1503	125	miRNA	NC_000075.6:-:118888874_118888931	4.43
novel_mir1506	33	miRNA	NC_000079.6:-:68900422_68900486	1.17
novel_mir1507	47	miRNA	NC_000086.7:+:7728029_7728072	1.67
novel_mir1508	36	miRNA	NC_000080.6:-:74641843_74641926	1.28
novel_mir1510	143	miRNA	NC_000070.6:+:66232901_66232974	5.07
novel_mir408	65	miRNA	NC_000071.6:-:136431958_136432023	2.3
novel_mir1512	72	miRNA	NC_000073.6:-:44630618_44630674	2.55
novel_mir1513	36	miRNA	NC_000079.6:-:3317223_3317294	1.28
novel_mir1514	227	miRNA	NC_000084.6:-:37343235_37343308	8.04
novel_mir1516	34	miRNA	NC_000078.6:+:65421010_65421080	1.2
novel_mir1517	102	miRNA	NC_000080.6:-:17782379_17782426	3.61
novel_mir142	15	miRNA	NC_000085.6:-:46044673_46044751	0.53
novel_mir1518	229	miRNA	NT_187024.1:+:73453_73501	8.11
novel_mir1519	26	miRNA	NC_000084.6:+:32419155_32419229	0.92
novel_mir1523	97	miRNA	NC_000067.6:-:159842557_159842618	3.44
novel_mir1526	36	miRNA	NC_000067.6:+:93976223_93976276	1.28
novel_mir1530	153	miRNA	NC_000069.6:-:135102007_135102097	5.42
novel_mir1531	390	miRNA	NC_000072.6:-:63079480_63079574	13.82
novel_mir1535	12386	miRNA	NC_000071.6:+:39248474_39248514	438.92
novel_mir1536	94	miRNA	NC_000079.6:-:45339554_45339621	3.33
novel_mir1540	142	miRNA	NC_000067.6:+:78034248_78034310	5.03
novel_mir1541	132	miRNA	NC_000082.6:-:8545466_8545517	4.68
novel_mir1543	52	miRNA	NC_000082.6:-:44370333_44370419	1.84
novel_mir1544	105	miRNA	NC_000080.6:-:24975547_24975616	3.72
novel_mir1546	85	miRNA	NT_187023.1:+:134499_134574	3.01
novel_mir1549	208	miRNA	NC_000083.6:-:4507530_4507589	7.37
novel_mir1552	64	miRNA	NC_000073.6:-:54702419_54702492	2.27
novel_mir1553	132	miRNA	NC_000083.6:+:3346772_3346853	4.68
novel_mir1554	26	miRNA	NC_000075.6:+:51242966_51243042	0.92
novel_mir1556	19	miRNA	NC_000073.6:+:83857457_83857522	0.67
novel_mir1557	435	miRNA	NC_000084.6:+:84134505_84134585	15.41
novel_mir1558	52	miRNA	NC_000083.6:-:24739494_24739568	1.84
novel_mir1561	44	miRNA	NC_000067.6:-:138672706_138672757	1.56
novel_mir1563	124	miRNA	NC_000069.6:+:67183260_67183317	4.39
novel_mir1565	599	miRNA	NC_000075.6:-:113489507_113489552	21.23
novel_mir1566	56	miRNA	NC_000072.6:-:94943283_94943366	1.98
novel_mir1567	40	miRNA	NC_000070.6:+:128862017_128862061	1.42
novel_mir1568	42	miRNA	NC_000078.6:-:38984322_38984409	1.49
novel_mir1569	19	miRNA	NC_000079.6:-:69521799_69521863	0.67
novel_mir1570	15	miRNA	NC_000070.6:-:93638413_93638486	0.53
novel_mir227	57	miRNA	NC_000075.6:-:119941103_119941159	2.02
novel_mir1571	217	miRNA	NC_000074.6:-:17289628_17289696	7.69
novel_mir1572	61	miRNA	NC_000076.6:-:126935308_126935392	2.16
novel_mir1573	124	miRNA	NC_000069.6:-:94098121_94098184	4.39
novel_mir1575	315	miRNA	NC_000079.6:-:56221062_56221119	11.16
novel_mir1577	31	miRNA	NC_000073.6:-:40525701_40525766	1.1
novel_mir1579	35	miRNA	NC_000086.7:-:36856580_36856650	1.24
novel_mir1581	76	miRNA	NC_000082.6:+:95861177_95861258	2.69
novel_mir1582	40	miRNA	NC_000084.6:-:83948349_83948421	1.42
novel_mir1586	62	miRNA	NC_000079.6:+:27494555_27494610	2.2
novel_mir1587	62	miRNA	NC_000068.7:+:17838373_17838437	2.2
novel_mir1588	78	miRNA	NC_000071.6:-:72648304_72648386	2.76
novel_mir1589	358	miRNA	NC_000069.6:+:95384184_95384270	12.69
novel_mir1592	51	miRNA	NC_000068.7:-:34402361_34402437	1.81
novel_mir1593	46	miRNA	NC_000084.6:+:36778854_36778900	1.63
novel_mir1594	56	miRNA	NC_000075.6:+:94705835_94705903	1.98
novel_mir1595	62	miRNA	NC_000073.6:-:98505271_98505330	2.2
novel_mir1596	203	miRNA	NC_000077.6:+:78845717_78845812	7.19
novel_mir1598	38	miRNA	NC_000075.6:+:63831217_63831301	1.35
novel_mir1600	98	miRNA	NC_000081.6:-:84718069_84718118	3.47
novel_mir1601	52	miRNA	NC_000075.6:-:69764330_69764379	1.84
novel_mir1605	37	miRNA	NC_000067.6:-:38693976_38694047	1.31
novel_mir1606	29	miRNA	NC_000078.6:-:110199657_110199724	1.03
novel_mir1607	54	miRNA	NC_000067.6:+:181015121_181015174	1.91
novel_mir1610	95	miRNA	NC_000075.6:-:87167037_87167093	3.37
novel_mir1611	393	miRNA	NC_000086.7:+:67762534_67762608	13.93
novel_mir1613	38	miRNA	NC_000072.6:-:128389410_128389463	1.35
novel_mir1614	78	miRNA	NC_000078.6:+:91002011_91002078	2.76
novel_mir1615	11	miRNA	NC_000076.6:-:80075945_80076015	0.39
novel_mir1619	99	miRNA	NC_000067.6:-:59280049_59280123	3.51
novel_mir1620	145	miRNA	NC_000074.6:+:119839920_119839966	5.14
novel_mir479	49	miRNA	NC_000070.6:+:84333133_84333182	1.74
novel_mir1621	91	miRNA	NC_000079.6:-:103355828_103355875	3.22
novel_mir1622	194	miRNA	NC_000080.6:-:105485103_105485163	6.87
novel_mir1623	100	miRNA	NC_000074.6:+:93842795_93842878	3.54
novel_mir1624	64	miRNA	NC_000075.6:-:108500119_108500177	2.27
novel_mir1628	120	miRNA	NC_000086.7:+:76347467_76347538	4.25
novel_mir22	157	miRNA	NC_000072.6:-:72807349_72807407	5.56
novel_mir1632	128	miRNA	NC_000067.6:+:125561683_125561739	4.54
novel_mir1634	22	miRNA	NC_000080.6:-:66892527_66892569	0.78
novel_mir1637	109	miRNA	NC_000073.6:+:102210338_102210419	3.86
novel_mir1638	64	miRNA	NC_000073.6:-:80098871_80098935	2.27
novel_mir1639	39	miRNA	NC_000069.6:+:96561451_96561507	1.38
novel_mir1643	66	miRNA	NC_000078.6:+:4281507_4281551	2.34
novel_mir1644	160	miRNA	NC_000081.6:+:86744642_86744707	5.67
novel_mir1645	97	miRNA	NC_000077.6:-:22748446_22748488	3.44
novel_mir1646	173	miRNA	NC_000081.6:+:20042889_20042939	6.13
novel_mir1647	71	miRNA	NC_000071.6:+:148398961_148399043	2.52
novel_mir1649	120	miRNA	NC_000068.7:+:168385171_168385223	4.25
novel_mir1651	64	miRNA	NC_000071.6:-:137672578_137672622	2.27
novel_mir1655	75	miRNA	NC_000070.6:+:33906579_33906663	2.66
novel_mir1656	64	miRNA	NC_000083.6:+:85415748_85415827	2.27
novel_mir1657	64	miRNA	NC_000084.6:+:69369494_69369550	2.27
novel_mir1659	60	miRNA	NC_000075.6:-:55107186_55107249	2.13
novel_mir1662	80	miRNA	NC_000081.6:-:101181760_101181829	2.83
novel_mir1664	165	miRNA	NC_000081.6:+:78557539_78557588	5.85
novel_mir1667	13	miRNA	NC_000069.6:-:149107186_149107254	0.46
novel_mir1668	36	miRNA	NC_000068.7:+:146832776_146832852	1.28
novel_mir1669	65	miRNA	NC_000069.6:+:112254063_112254116	2.3
novel_mir1670	695	miRNA	NC_000077.6:+:80199178_80199233	24.63
novel_mir1672	47	miRNA	NC_000077.6:+:91830156_91830216	1.67
novel_mir1674	34	miRNA	NC_000077.6:+:39883552_39883637	1.2
novel_mir1675	12	miRNA	NC_000075.6:+:7864530_7864568	0.43
novel_mir1677	18	miRNA	NC_000082.6:-:8535012_8535079	0.64
novel_mir1679	37	miRNA	NC_000068.7:+:18065925_18066009	1.31
novel_mir1680	11	miRNA	NC_000077.6:-:110818788_110818833	0.39
novel_mir1681	257	miRNA	NC_000067.6:-:127259123_127259177	9.11
novel_mir1683	138	miRNA	NC_000074.6:+:126365146_126365195	4.89
novel_mir1684	152	miRNA	NC_000073.6:-:105765509_105765582	5.39
novel_mir1685	181	miRNA	NC_000079.6:-:95861396_95861446	6.41
novel_mir1688	19	miRNA	NC_000078.6:-:26116297_26116351	0.67
novel_mir1689	35	miRNA	NC_000077.6:-:118282936_118283010	1.24
novel_mir1690	95	miRNA	NC_000072.6:+:70911830_70911911	3.37
novel_mir1691	101	miRNA	NC_000084.6:-:74197050_74197100	3.58
novel_mir1692	272	miRNA	NC_000071.6:+:68747329_68747387	9.64
novel_mir1693	28	miRNA	NC_000069.6:-:6317195_6317247	0.99
novel_mir1695	100	miRNA	NC_000076.6:-:60777536_60777581	3.54
novel_mir1698	151	miRNA	NC_000072.6:-:55078581_55078654	5.35
novel_mir1700	114	miRNA	NC_000085.6:+:27118937_27119002	4.04
novel_mir816	89	miRNA	NC_000072.6:+:108668903_108668974	3.15
novel_mir1705	78	miRNA	NC_000079.6:-:30708779_30708850	2.76
novel_mir1706	89	miRNA	NC_000077.6:-:31563868_31563950	3.15
novel_mir1707	46	miRNA	NC_000077.6:-:53920752_53920796	1.63
novel_mir1708	100	miRNA	NC_000085.6:-:7406036_7406105	3.54
novel_mir1709	41	miRNA	NC_000073.6:+:130759319_130759385	1.45
novel_mir1710	19	miRNA	NC_000068.7:-:55849439_55849496	0.67
novel_mir1711	138	miRNA	NC_000072.6:+:125875940_125875989	4.89
novel_mir1712	40	miRNA	NC_000076.6:-:75818648_75818716	1.42
novel_mir1714	55	miRNA	NC_000070.6:-:108330946_108331005	1.95
novel_mir1715	63	miRNA	NC_000082.6:-:87501873_87501918	2.23
novel_mir1716	53	miRNA	NC_000080.6:+:32656211_32656289	1.88
novel_mir1718	137	miRNA	NC_000081.6:-:99554336_99554415	4.85
novel_mir1719	37	miRNA	NC_000071.6:+:33378000_33378073	1.31
novel_mir1721	65	miRNA	NC_000070.6:+:140004805_140004883	2.3
novel_mir1723	160	miRNA	NC_000071.6:+:31805498_31805553	5.67
novel_mir1724	70	miRNA	NC_000071.6:+:140163616_140163657	2.48
novel_mir1725	57	miRNA	NC_000084.6:+:63929218_63929295	2.02
novel_mir1727	106	miRNA	NC_000068.7:-:22987767_22987853	3.76
novel_mir1728	119	miRNA	NC_000068.7:-:90561578_90561664	4.22
novel_mir1729	75	miRNA	NC_000068.7:+:164108760_164108830	2.66
novel_mir1730	95	miRNA	NC_000081.6:-:83817532_83817591	3.37
novel_mir1733	77	miRNA	NC_000077.6:-:117150287_117150335	2.73
novel_mir1734	101	miRNA	NC_000068.7:-:75608170_75608259	3.58
novel_mir1736	39	miRNA	NC_000071.6:-:14214070_14214131	1.38
novel_mir1737	82	miRNA	NC_000085.6:+:6165026_6165066	2.91
novel_mir1739	114	miRNA	NC_000083.6:+:81745536_81745615	4.04
novel_mir1744	41	miRNA	NC_000081.6:-:88024592_88024674	1.45
novel_mir1746	58	miRNA	NC_000070.6:+:138370580_138370633	2.06
novel_mir1747	179	miRNA	NC_000075.6:-:43481248_43481296	6.34
novel_mir1748	36	miRNA	NC_000076.6:-:13811164_13811225	1.28
novel_mir1749	10	miRNA	NC_000072.6:+:134335093_134335171	0.35
novel_mir1752	24	miRNA	NC_000072.6:+:71324078_71324123	0.85
novel_mir1753	102	miRNA	NC_000081.6:-:67441651_67441713	3.61
novel_mir1755	35	miRNA	NC_000083.6:+:64277830_64277898	1.24
novel_mir1757	84	miRNA	NC_000068.7:-:115979384_115979430	2.98
novel_mir1758	33	miRNA	NC_000068.7:-:152003393_152003466	1.17
novel_mir1760	163	miRNA	NC_000085.6:-:3463792_3463855	5.78
novel_mir1762	140	miRNA	NC_000086.7:+:96092486_96092561	4.96
novel_mir1763	11	miRNA	NC_000083.6:+:56256040_56256113	0.39
novel_mir1764	94	miRNA	NC_000070.6:-:42872105_42872193	3.33
novel_mir1765	45	miRNA	NC_000069.6:-:143748381_143748445	1.59
novel_mir1767	44	miRNA	NC_000067.6:+:125368361_125368426	1.56
novel_mir1768	114	miRNA	NC_000078.6:-:118732919_118732987	4.04
novel_mir1769	68	miRNA	NC_000069.6:+:136706222_136706282	2.41
novel_mir1770	90	miRNA	NC_000078.6:+:86420824_86420895	3.19
novel_mir1771	68	miRNA	NC_000070.6:+:9534300_9534341	2.41
novel_mir1772	55	miRNA	NC_000072.6:+:113180333_113180414	1.95
novel_mir1773	40	miRNA	NC_000075.6:+:119742991_119743048	1.42
novel_mir1775	73	miRNA	NC_000077.6:-:34273716_34273762	2.59
novel_mir1777	42	miRNA	NC_000083.6:+:23661557_23661622	1.49
novel_mir1778	58	miRNA	NC_000071.6:+:148272611_148272647	2.06
novel_mir1781	12	miRNA	NC_000086.7:+:102031551_102031619	0.43
novel_mir1783	72	miRNA	NC_000082.6:-:30505904_30505951	2.55
novel_mir1785	98	miRNA	NC_000068.7:+:57298252_57298310	3.47
novel_mir1786	46	miRNA	NC_000068.7:+:49298470_49298537	1.63
novel_mir1787	123	miRNA	NC_000071.6:-:45546271_45546355	4.36
novel_mir1790	350	miRNA	NC_000085.6:-:41797104_41797151	12.4
novel_mir1791	46	miRNA	NC_000077.6:+:120489564_120489628	1.63
novel_mir1792	130	miRNA	NC_000068.7:+:160479522_160479574	4.61
novel_mir1784	14	miRNA	NC_000067.6:-:165689967_165690024	0.5
novel_mir1795	139	miRNA	NC_000086.7:-:127664770_127664844	4.93
novel_mir1797	32	miRNA	NC_000067.6:+:47794932_47795009	1.13
novel_mir300	32	miRNA	NC_000077.6:-:108075363_108075454	1.13
novel_mir1798	262	miRNA	NC_000086.7:+:69994653_69994706	9.28
novel_mir1799	96	miRNA	NC_000071.6:+:33540863_33540915	3.4
novel_mir1800	106	miRNA	NC_000076.6:-:21783528_21783573	3.76
novel_mir1803	28	miRNA	NC_000068.7:-:148817833_148817889	0.99
novel_mir1805	51	miRNA	NC_000086.7:-:134577268_134577319	1.81
novel_mir1336	257	miRNA	NC_000081.6:-:74564867_74564946	9.11
novel_mir1809	52	miRNA	NC_000076.6:-:22382144_22382223	1.84
novel_mir615	56	miRNA	NC_000074.6:+:69816183_69816235	1.98
novel_mir937	57	miRNA	NC_000075.6:-:47102390_47102450	2.02
novel_mir1812	83	miRNA	NC_000070.6:+:10841863_10841922	2.94
novel_mir1813	96	miRNA	NC_000076.6:-:62349673_62349723	3.4
novel_mir1814	34	miRNA	NC_000075.6:-:56837903_56837992	1.2
novel_mir1815	115	miRNA	NC_000071.6:+:123172180_123172264	4.08
novel_mir1817	39	miRNA	NC_000070.6:+:53616975_53617014	1.38
novel_mir1820	59	miRNA	NC_000079.6:-:29386735_29386786	2.09
novel_mir1821	94	miRNA	NC_000076.6:+:29781556_29781599	3.33
novel_mir1824	67	miRNA	NC_000083.6:+:72205922_72205982	2.37
novel_mir1825	47	miRNA	NC_000082.6:+:14000225_14000301	1.67
novel_mir1826	260	miRNA	NC_000079.6:-:54198995_54199059	9.21
novel_mir1831	151	miRNA	NC_000074.6:+:79328267_79328339	5.35
novel_mir1834	42	miRNA	NC_000082.6:-:12650870_12650921	1.49
novel_mir1835	79	miRNA	NC_000067.6:-:9629142_9629190	2.8
novel_mir1836	30	miRNA	NC_000067.6:+:69694807_69694867	1.06
novel_mir1837	33	miRNA	NC_000075.6:+:25511870_25511949	1.17
novel_mir1838	41	miRNA	NC_000072.6:+:142495038_142495092	1.45
novel_mir1839	37	miRNA	NC_000068.7:-:171132576_171132646	1.31
novel_mir1840	26	miRNA	NC_000084.6:-:76024631_76024710	0.92
novel_mir1844	158	miRNA	NC_000074.6:-:96435852_96435897	5.6
novel_mir1849	125	miRNA	NC_000086.7:-:134208313_134208379	4.43
novel_mir1850	53	miRNA	NC_000071.6:+:140698861_140698934	1.88
novel_mir1851	19	miRNA	NC_000076.6:+:36811148_36811212	0.67
novel_mir1852	36	miRNA	NC_000081.6:-:79188029_79188101	1.28
novel_mir1853	73	miRNA	NC_000079.6:-:41020102_41020183	2.59
novel_mir1854	211	miRNA	NC_000068.7:-:167384262_167384316	7.48
novel_mir1855	57	miRNA	NC_000078.6:+:112409298_112409358	2.02
novel_mir1857	11	miRNA	NC_000080.6:-:61905660_61905716	0.39
novel_mir1858	100	miRNA	NC_000075.6:-:69699888_69699938	3.54
novel_mir1860	158	miRNA	NC_000073.6:-:128191716_128191766	5.6
novel_mir1861	72	miRNA	NC_000068.7:-:142785883_142785948	2.55
novel_mir1862	31	miRNA	NC_000085.6:+:29754687_29754757	1.1
novel_mir1863	3784	miRNA	NC_000084.6:+:12769863_12769950	134.09
novel_mir1864	80	miRNA	NC_000073.6:-:75384473_75384561	2.83
novel_mir1867	59	miRNA	NC_000067.6:+:138701294_138701362	2.09
novel_mir1868	17	miRNA	NC_000075.6:+:12405837_12405911	0.6
novel_mir1869	122	miRNA	NC_000077.6:-:60913264_60913333	4.32
novel_mir1870	132	miRNA	NC_000070.6:+:125674936_125675016	4.68
novel_mir1871	102	miRNA	NC_000074.6:+:111090661_111090739	3.61
novel_mir1873	10	miRNA	NC_000068.7:+:10142922_10142995	0.35
novel_mir1874	62	miRNA	NC_000070.6:+:52814726_52814799	2.2
novel_mir1876	53	miRNA	NC_000077.6:+:32198553_32198605	1.88
novel_mir1877	48	miRNA	NC_000067.6:+:125404261_125404325	1.7
novel_mir1878	29	miRNA	NC_000071.6:-:114181472_114181548	1.03
novel_mir1884	26	miRNA	NC_000071.6:+:123203358_123203424	0.92
novel_mir1886	79	miRNA	NC_000074.6:-:58995716_58995790	2.8
novel_mir1888	79	miRNA	NC_000072.6:-:76689042_76689115	2.8
novel_mir1694	57	miRNA	NT_187025.1:+:452852_452930	2.02
novel_mir1889	72	miRNA	NC_000079.6:-:11147005_11147054	2.55
novel_mir1891	40	miRNA	NC_000079.6:-:34149358_34149432	1.42
novel_mir1893	33	miRNA	NC_000067.6:-:172088926_172089003	1.17
novel_mir1894	188	miRNA	NC_000081.6:-:100908654_100908724	6.66
novel_mir1898	107	miRNA	NC_000067.6:+:89458016_89458084	3.79
novel_mir1902	122	miRNA	NC_000071.6:+:21174358_21174446	4.32
novel_mir1904	47	miRNA	NC_000080.6:-:55609729_55609813	1.67
novel_mir1907	162	miRNA	NC_000071.6:+:30704586_30704674	5.74
novel_mir1909	21	miRNA	NC_000085.6:+:30832107_30832180	0.74
novel_mir1911	43	miRNA	NC_000078.6:-:95291925_95291986	1.52
novel_mir1912	35	miRNA	NC_000071.6:+:46441806_46441885	1.24
novel_mir1914	41	miRNA	NC_000083.6:-:29683834_29683881	1.45
novel_mir1915	51	miRNA	NC_000082.6:-:50289273_50289315	1.81
novel_mir1922	30	miRNA	NC_000083.6:-:55247876_55247923	1.06
novel_mir1923	120	miRNA	NC_000071.6:+:121282071_121282155	4.25
novel_mir1925	140	miRNA	NC_000079.6:+:73113105_73113156	4.96
novel_mir1926	135	miRNA	NC_000083.6:+:66616251_66616340	4.78
novel_mir1927	46	miRNA	NC_000072.6:+:45383645_45383732	1.63
novel_mir1928	159	miRNA	NC_000067.6:+:144083795_144083878	5.63
novel_mir1930	335	miRNA	NC_000075.6:-:31490369_31490445	11.87
novel_mir1681	50	miRNA	NC_000076.6:+:127706400_127706462	1.77
novel_mir715	61	miRNA	NC_000071.6:+:122172030_122172072	2.16
novel_mir1940	368	miRNA	NC_000071.6:-:28288476_28288535	13.04
novel_mir1941	16	miRNA	NC_000068.7:+:160685584_160685644	0.57
novel_mir1943	43	miRNA	NC_000073.6:+:142682416_142682470	1.52
novel_mir1946	570	miRNA	NC_000072.6:+:81868897_81868960	20.2
novel_mir1947	40	miRNA	NC_000070.6:+:141522227_141522294	1.42
novel_mir1948	22	miRNA	NC_000071.6:-:96996820_96996884	0.78
novel_mir1950	23	miRNA	NC_000081.6:+:60288046_60288107	0.82
novel_mir1095	71	miRNA	NC_000077.6:+:85706284_85706335	2.52
novel_mir1952	89	miRNA	NC_000070.6:-:18796182_18796250	3.15
novel_mir1954	21	miRNA	NC_000068.7:+:7052122_7052207	0.74
novel_mir1956	1498	miRNA	NC_000068.7:-:32922850_32922933	53.08
novel_mir1958	73	miRNA	NC_000070.6:-:79542830_79542895	2.59
novel_mir1959	36	miRNA	NC_000072.6:-:127754070_127754152	1.28
novel_mir1960	26	miRNA	NC_000083.6:-:44214626_44214716	0.92
novel_mir1961	99	miRNA	NC_000072.6:-:64985016_64985097	3.51
novel_mir1964	64	miRNA	NC_000077.6:-:113606245_113606306	2.27
novel_mir1965	67	miRNA	NC_000067.6:+:174590738_174590804	2.37
novel_mir1967	150	miRNA	NC_000073.6:+:131149167_131149240	5.32
novel_mir1970	37	miRNA	NC_000069.6:+:108456774_108456834	1.31
novel_mir1971	4505	miRNA	NC_000071.6:+:99512682_99512765	159.64
novel_mir1974	348	miRNA	NC_000074.6:-:61913047_61913132	12.33
novel_mir1976	51	miRNA	NT_187004.1:-:2794196_2794263	1.81
novel_mir1978	23	miRNA	NC_000077.6:+:7426726_7426779	0.82
novel_mir1981	187	miRNA	NC_000068.7:-:25294123_25294162	6.63
novel_mir1982	33	miRNA	NC_000069.6:-:96600966_96601032	1.17
novel_mir1983	113	miRNA	NC_000071.6:-:106164833_106164893	4
novel_mir1984	32	miRNA	NC_000078.6:-:40014291_40014363	1.13
novel_mir1986	68	miRNA	NC_000070.6:+:155905462_155905531	2.41
novel_mir1989	36	miRNA	NC_000080.6:-:68930734_68930782	1.28
novel_mir1990	107	miRNA	NC_000083.6:+:51018466_51018509	3.79
novel_mir1991	106	miRNA	NC_000076.6:+:42653341_42653409	3.76
novel_mir1992	36	miRNA	NC_000068.7:+:115550223_115550291	1.28
novel_mir1995	99	miRNA	NC_000082.6:+:96436912_96436974	3.51
novel_mir1997	661	miRNA	NC_000073.6:+:140957677_140957732	23.42
novel_mir1998	49	miRNA	NC_000071.6:+:10876374_10876463	1.74
novel_mir1999	42	miRNA	NC_000084.6:+:32281582_32281626	1.49
novel_mir2000	33	miRNA	NC_000077.6:+:78655782_78655866	1.17
novel_mir2001	106	miRNA	NC_000067.6:+:64748649_64748738	3.76
novel_mir2002	42	miRNA	NC_000067.6:+:37729637_37729692	1.49
novel_mir2008	90	miRNA	NC_000073.6:+:36023233_36023312	3.19
novel_mir2009	125	miRNA	NC_000075.6:+:80019767_80019818	4.43
novel_mir2010	48	miRNA	NC_000070.6:+:11349998_11350057	1.7
novel_mir2014	33	miRNA	NC_000077.6:-:98432580_98432627	1.17
novel_mir2015	75	miRNA	NC_000080.6:+:79234808_79234894	2.66
novel_mir2019	172	miRNA	NC_000071.6:-:148534520_148534585	6.1
novel_mir2020	67	miRNA	NC_000074.6:-:120968759_120968824	2.37
novel_mir824	32	miRNA	NC_000069.6:+:83055712_83055786	1.13
novel_mir2021	79	miRNA	NC_000072.6:-:92219773_92219826	2.8
novel_mir2023	21	miRNA	NC_000073.6:-:132314744_132314833	0.74
novel_mir2024	62	miRNA	NC_000071.6:-:114879457_114879521	2.2
novel_mir2026	142	miRNA	NC_000068.7:-:162139153_162139215	5.03
novel_mir2027	30	miRNA	NC_000067.6:-:177402976_177403041	1.06
novel_mir2031	20	miRNA	NC_000076.6:-:25522398_25522476	0.71
novel_mir2033	57	miRNA	NC_000086.7:+:42374873_42374948	2.02
novel_mir2034	321	miRNA	NC_000077.6:+:5682107_5682159	11.38
novel_mir2036	1095	miRNA	NC_000080.6:-:114460724_114460799	38.8
novel_mir483	80	miRNA	NC_000077.6:+:69303165_69303215	2.83
novel_mir2038	26	miRNA	NC_000069.6:+:150055820_150055873	0.92
novel_mir2040	98	miRNA	NC_000073.6:+:113929642_113929693	3.47
novel_mir2041	107	miRNA	NC_000075.6:-:123492507_123492568	3.79
novel_mir2042	85	miRNA	NC_000071.6:-:139158007_139158072	3.01
novel_mir2043	19	miRNA	NC_000083.6:-:87570155_87570209	0.67
novel_mir2045	230	miRNA	NC_000079.6:+:95786451_95786520	8.15
novel_mir2048	29	miRNA	NC_000067.6:+:20839042_20839097	1.03
novel_mir2049	72	miRNA	NC_000067.6:+:82339641_82339684	2.55
novel_mir2050	43	miRNA	NC_000070.6:+:137331307_137331366	1.52
novel_mir2053	74	miRNA	NC_000070.6:-:137908456_137908519	2.62
novel_mir2055	308	miRNA	NC_000074.6:-:118861392_118861476	10.91
novel_mir2057	90	miRNA	NC_000080.6:-:96200033_96200073	3.19
novel_mir2058	79	miRNA	NC_000071.6:-:134976716_134976779	2.8
novel_mir2059	66	miRNA	NC_000084.6:-:49362584_49362647	2.34
novel_mir2061	53	miRNA	NC_000078.6:+:76566154_76566196	1.88
novel_mir2062	100	miRNA	NC_000079.6:+:23423883_23423964	3.54
novel_mir2063	125	miRNA	NC_000086.7:+:23552540_23552608	4.43
novel_mir2064	169	miRNA	NC_000083.6:-:30445219_30445285	5.99
novel_mir2065	423	miRNA	NC_000083.6:+:12675861_12675908	14.99
novel_mir2066	109	miRNA	NC_000075.6:+:27243871_27243945	3.86
novel_mir2067	43	miRNA	NC_000072.6:+:29191767_29191804	1.52
novel_mir2069	41	miRNA	NC_000069.6:-:100287297_100287375	1.45
novel_mir2071	46	miRNA	NC_000070.6:-:153426691_153426741	1.63
novel_mir2073	112	miRNA	NC_000073.6:+:118722419_118722491	3.97
novel_mir2076	52	miRNA	NC_000077.6:+:93699585_93699631	1.84
novel_mir1510	200	miRNA	NC_000070.6:+:66232950_66233024	7.09
novel_mir2079	5229	miRNA	NC_000072.6:+:89094370_89094444	185.3
novel_mir1540	60	miRNA	NC_000071.6:-:133778321_133778375	2.13
novel_mir2082	66	miRNA	NC_000069.6:+:33290925_33290982	2.34
novel_mir2085	60	miRNA	NC_000073.6:-:141882208_141882281	2.13
novel_mir2088	479	miRNA	NC_000076.6:+:117658844_117658882	16.97
novel_mir2089	196	miRNA	NC_000068.7:-:14213596_14213659	6.95
novel_mir2090	52	miRNA	NC_000085.6:-:25241298_25241360	1.84
novel_mir2091	86	miRNA	NC_000074.6:+:75079032_75079095	3.05
novel_mir2094	51	miRNA	NC_000068.7:+:180270465_180270536	1.81
novel_mir2100	70	miRNA	NC_000077.6:+:103273558_103273622	2.48
novel_mir2101	72	miRNA	NC_000070.6:+:141778733_141778819	2.55
novel_mir2102	104	miRNA	NC_000077.6:+:120360371_120360435	3.69
novel_mir2106	50	miRNA	NC_000071.6:+:33442759_33442812	1.77
novel_mir2107	203	miRNA	NC_000070.6:+:29046519_29046577	7.19
novel_mir2108	30	miRNA	NC_000079.6:-:36403309_36403364	1.06
novel_mir2109	127	miRNA	NC_000076.6:-:43429195_43429242	4.5
novel_mir2110	148	miRNA	NW_016097321.1:-:125731_125821	5.24
novel_mir1105	29	miRNA	NC_000080.6:-:25560842_25560899	1.03
novel_mir2113	152	miRNA	NC_000079.6:+:26194534_26194582	5.39
novel_mir2114	952	miRNA	NC_000086.7:-:20715609_20715669	33.74
novel_mir2115	91	miRNA	NC_000073.6:-:19252633_19252720	3.22
novel_mir2117	113	miRNA	NC_000073.6:+:62005176_62005231	4
novel_mir2119	51	miRNA	NC_000075.6:-:121536011_121536082	1.81
novel_mir261	34	miRNA	NC_000073.6:-:121713979_121714052	1.2
novel_mir2121	60	miRNA	NC_000069.6:-:107910471_107910541	2.13
novel_mir2123	185	miRNA	NC_000082.6:+:90507758_90507814	6.56
novel_mir2124	36	miRNA	NC_000069.6:-:9244654_9244729	1.28
novel_mir2127	44	miRNA	NC_000083.6:-:71457078_71457163	1.56
novel_mir2128	85	miRNA	NC_000080.6:-:55385370_55385431	3.01
novel_mir2130	45	miRNA	NC_000069.6:-:120874639_120874699	1.59
novel_mir2131	71	miRNA	NC_000077.6:-:59286910_59286958	2.52
novel_mir2132	138	miRNA	NC_000075.6:-:74856116_74856160	4.89
novel_mir2135	394	miRNA	NC_000069.6:-:124222289_124222350	13.96
novel_mir2137	51	miRNA	NC_000083.6:-:23763288_23763372	1.81
novel_mir2140	65	miRNA	NC_000071.6:+:140586891_140586945	2.3
novel_mir2143	127	miRNA	NC_000067.6:-:64884209_64884260	4.5
novel_mir2144	86	miRNA	NC_000085.6:+:4585370_4585449	3.05
novel_mir1591	75	miRNA	NC_000068.7:+:93831895_93831958	2.66
novel_mir2145	54	miRNA	NC_000071.6:-:117577720_117577794	1.91
novel_mir2146	49	miRNA	NC_000085.6:+:56893160_56893237	1.74
novel_mir2147	42	miRNA	NC_000078.6:+:30021411_30021468	1.49
novel_mir2149	60	miRNA	NC_000071.6:+:103918971_103919033	2.13
novel_mir2151	55	miRNA	NC_000073.6:-:123046417_123046478	1.95
novel_mir2153	58	miRNA	NC_000069.6:+:74803967_74804032	2.06
novel_mir2154	66	miRNA	NC_000084.6:-:23785112_23785168	2.34
novel_mir2155	43	miRNA	NC_000071.6:+:114355566_114355642	1.52
novel_mir1596	91	miRNA	NC_000070.6:-:3718599_3718661	3.22
novel_mir2156	72	miRNA	NC_000072.6:+:51565526_51565581	2.55
novel_mir2157	37	miRNA	NC_000078.6:-:27152498_27152568	1.31
novel_mir2161	343	miRNA	NC_000083.6:-:66084019_66084058	12.15
novel_mir1866	49	miRNA	NC_000076.6:-:81152806_81152867	1.74
novel_mir2168	248	miRNA	NC_000068.7:-:138416372_138416444	8.79
novel_mir2169	36	miRNA	NC_000072.6:-:28264234_28264286	1.28
novel_mir2170	40	miRNA	NC_000080.6:+:35050220_35050277	1.42
novel_mir2171	132	miRNA	NC_000085.6:+:15907240_15907295	4.68
novel_mir2172	430	miRNA	NC_000070.6:+:23610381_23610443	15.24
novel_mir2173	15	miRNA	NC_000085.6:+:44821515_44821574	0.53
novel_mir2175	123	miRNA	NC_000081.6:-:63716600_63716683	4.36
novel_mir2177	47	miRNA	NC_000079.6:+:113761817_113761876	1.67
novel_mir2178	52	miRNA	NC_000073.6:+:117489531_117489577	1.84
novel_mir2179	95	miRNA	NC_000083.6:-:65073485_65073577	3.37
novel_mir2180	65	miRNA	NC_000067.6:+:110153789_110153859	2.3
novel_mir2181	50	miRNA	NC_000077.6:+:62873755_62873816	1.77
novel_mir2183	92	miRNA	NC_000083.6:+:72940346_72940413	3.26
novel_mir2184	32	miRNA	NC_000085.6:-:56527712_56527774	1.13
novel_mir2185	41	miRNA	NC_000082.6:-:9731057_9731100	1.45
novel_mir675	59	miRNA	NC_000070.6:-:139346254_139346308	2.09
novel_mir764	33	miRNA	NC_000074.6:+:117732017_117732100	1.17
novel_mir1067	30	miRNA	NC_000071.6:-:34332278_34332331	1.06
novel_mir2187	180	miRNA	NC_000076.6:-:66624067_66624106	6.38
novel_mir2189	16	miRNA	NC_000075.6:-:98666949_98667008	0.57
novel_mir2191	43	miRNA	NC_000070.6:-:137555611_137555682	1.52
novel_mir2192	63	miRNA	NC_000078.6:+:110669941_110670022	2.23
novel_mir2195	51	miRNA	NC_000071.6:+:117562518_117562569	1.81
novel_mir2198	35	miRNA	NC_000075.6:+:95656995_95657047	1.24
novel_mir2199	48	miRNA	NC_000067.6:-:128547661_128547751	1.7
novel_mir2203	53	miRNA	NC_000081.6:-:78447555_78447606	1.88
novel_mir2204	86	miRNA	NC_000083.6:+:3246292_3246339	3.05
novel_mir2205	41	miRNA	NC_000080.6:-:114317525_114317604	1.45
novel_mir2208	117	miRNA	NC_000070.6:+:17315256_17315337	4.15
novel_mir2211	79	miRNA	NC_000069.6:+:83549512_83549579	2.8
novel_mir2214	58	miRNA	NC_000067.6:-:118844614_118844659	2.06
novel_mir2215	1625	miRNA	NC_000074.6:-:84768832_84768894	57.58
novel_mir1850	41	miRNA	NC_000071.6:+:140698913_140698975	1.45
novel_mir2218	27	miRNA	NC_000080.6:+:9204213_9204263	0.96
novel_mir2221	51	miRNA	NC_000074.6:-:120357853_120357905	1.81
novel_mir2223	10	miRNA	NC_000083.6:+:55975938_55975997	0.35
novel_mir2224	59	miRNA	NC_000077.6:-:103901884_103901961	2.09
novel_mir2225	15	miRNA	NC_000078.6:-:9388772_9388828	0.53
novel_mir2226	56	miRNA	NC_000077.6:-:25694997_25695066	1.98
novel_mir2227	76	miRNA	NC_000078.6:-:31221154_31221222	2.69
novel_mir2228	39	miRNA	NC_000079.6:-:73852248_73852328	1.38
novel_mir2229	56	miRNA	NC_000084.6:+:80115742_80115793	1.98
novel_mir2230	25	miRNA	NC_000082.6:+:39020195_39020240	0.89
novel_mir2232	40	miRNA	NC_000070.6:+:42875113_42875173	1.42
novel_mir2234	56	miRNA	NC_000073.6:+:121222339_121222383	1.98
novel_mir2235	501	miRNA	NC_000075.6:+:26569513_26569563	17.75
novel_mir2236	46	miRNA	NC_000069.6:+:26843411_26843487	1.63
novel_mir2238	48	miRNA	NC_000073.6:-:84754062_84754123	1.7
novel_mir2239	346	miRNA	NC_000068.7:-:93169986_93170058	12.26
novel_mir2240	87	miRNA	NC_000073.6:-:65095793_65095843	3.08
novel_mir2246	51	miRNA	NC_000068.7:-:32992439_32992492	1.81
novel_mir2247	68	miRNA	NC_000072.6:-:132797477_132797565	2.41
novel_mir2248	62	miRNA	NC_000068.7:-:169417222_169417280	2.2
novel_mir2250	36	miRNA	NC_000069.6:-:8734864_8734912	1.28
novel_mir2253	40	miRNA	NC_000077.6:-:108180358_108180425	1.42
novel_mir2254	117	miRNA	NC_000079.6:+:60507716_60507797	4.15
novel_mir2257	101	miRNA	NC_000082.6:+:5355972_5356027	3.58
novel_mir2258	30	miRNA	NC_000071.6:-:128854507_128854579	1.06
novel_mir2259	78	miRNA	NC_000077.6:+:51868943_51868992	2.76
novel_mir2260	100	miRNA	NC_000077.6:+:119391983_119392048	3.54
novel_mir2262	114	miRNA	NC_000073.6:-:119057111_119057169	4.04
novel_mir2263	18	miRNA	NC_000072.6:+:10166354_10166454	0.64
novel_mir2264	44	miRNA	NC_000074.6:-:126188186_126188236	1.56
novel_mir2265	52	miRNA	NC_000076.6:-:60506441_60506515	1.84
novel_mir2268	273	miRNA	NC_000072.6:+:33863270_33863348	9.67
novel_mir2269	52	miRNA	NC_000076.6:+:122787290_122787347	1.84
novel_mir2270	151	miRNA	NC_000070.6:+:139430009_139430071	5.35
novel_mir2271	35	miRNA	NC_000069.6:-:44214570_44214626	1.24
novel_mir2272	11	miRNA	NC_000075.6:-:24727792_24727831	0.39
novel_mir2274	39	miRNA	NC_000075.6:+:58742091_58742128	1.38
novel_mir2275	67	miRNA	NC_000075.6:-:119568816_119568895	2.37
novel_mir2276	80	miRNA	NC_000071.6:+:122112465_122112529	2.83
novel_mir2279	196	miRNA	NC_000081.6:-:84842050_84842127	6.95
novel_mir2280	58	miRNA	NC_000075.6:-:71469020_71469079	2.06
novel_mir2282	101	miRNA	NC_000077.6:-:103072911_103072955	3.58
novel_mir2283	32	miRNA	NC_000079.6:+:11360348_11360397	1.13
novel_mir2284	42	miRNA	NC_000077.6:+:51186164_51186217	1.49
novel_mir2286	51	miRNA	NC_000079.6:-:71933615_71933669	1.81
novel_mir2289	45	miRNA	NC_000078.6:+:21603068_21603120	1.59
novel_mir2292	41	miRNA	NC_000069.6:-:84389662_84389746	1.45
novel_mir2295	50	miRNA	NC_000084.6:+:64304999_64305074	1.77
novel_mir2296	82	miRNA	NC_000071.6:-:86488128_86488192	2.91
novel_mir2297	127	miRNA	NT_187004.1:-:968225_968291	4.5
novel_mir2298	631	miRNA	NC_000080.6:+:45901219_45901312	22.36
novel_mir2299	408	miRNA	NC_000077.6:-:60176349_60176385	14.46
novel_mir2301	103	miRNA	NC_000074.6:+:47404637_47404708	3.65
novel_mir2302	68	miRNA	NC_000067.6:+:64708482_64708553	2.41
novel_mir2303	55	miRNA	NC_000075.6:+:42513473_42513563	1.95
novel_mir2305	165	miRNA	NC_000071.6:-:143526104_143526161	5.85
novel_mir2306	38	miRNA	NC_000085.6:-:54962668_54962734	1.35
novel_mir2307	23	miRNA	NC_000073.6:-:5068833_5068881	0.82
novel_mir2309	96	miRNA	NC_000080.6:+:103030360_103030432	3.4
novel_mir2311	85	miRNA	NC_000068.7:-:69532219_69532301	3.01
novel_mir2312	181	miRNA	NC_000070.6:-:121725458_121725539	6.41
novel_mir2315	207	miRNA	NC_000073.6:+:63403801_63403859	7.34
novel_mir2316	90	miRNA	NC_000067.6:-:22242579_22242643	3.19
novel_mir2317	36	miRNA	NC_000067.6:-:175573670_175573747	1.28
novel_mir2319	58	miRNA	NC_000086.7:+:105614101_105614148	2.06
novel_mir2321	62	miRNA	NC_000067.6:-:167673402_167673473	2.2
novel_mir22	215	miRNA	NC_000069.6:+:57508654_57508710	7.62
novel_mir2324	57	miRNA	NC_000078.6:-:82030109_82030158	2.02
novel_mir2326	44	miRNA	NC_000079.6:-:36280530_36280577	1.56
novel_mir2328	40	miRNA	NC_000085.6:+:29659779_29659854	1.42
novel_mir2329	27	miRNA	NC_000077.6:-:16805217_16805301	0.96
novel_mir2330	58	miRNA	NC_000081.6:-:101031659_101031730	2.06
novel_mir1626	241	miRNA	NC_000070.6:-:141158222_141158263	8.54
novel_mir2331	36	miRNA	NC_000077.6:-:89528156_89528230	1.28
novel_mir2332	70	miRNA	NT_187025.1:+:711896_711960	2.48
novel_mir2334	100	miRNA	NC_000068.7:+:167890015_167890102	3.54
novel_mir2336	10	miRNA	NC_000067.6:-:104991730_104991780	0.35
novel_mir2337	210	miRNA	NC_000082.6:+:23420894_23420944	7.44
novel_mir2338	105	miRNA	NC_000072.6:-:81257860_81257915	3.72
novel_mir2340	66	miRNA	NC_000080.6:-:122377221_122377267	2.34
novel_mir2341	42	miRNA	NC_000077.6:-:99249098_99249173	1.49
novel_mir2342	37	miRNA	NC_000073.6:+:38145783_38145866	1.31
novel_mir2343	48	miRNA	NC_000071.6:-:96848435_96848514	1.7
novel_mir2344	123	miRNA	NC_000073.6:+:16744177_16744223	4.36
novel_mir2346	770	miRNA	NC_000070.6:+:69830444_69830496	27.29
novel_mir2348	43	miRNA	NC_000073.6:-:71345045_71345102	1.52
novel_mir2349	111	miRNA	NC_000082.6:+:17681861_17681933	3.93
novel_mir2350	34	miRNA	NC_000072.6:-:98715409_98715466	1.2
novel_mir2352	128	miRNA	NC_000067.6:+:45331124_45331175	4.54
novel_mir2353	94	miRNA	NC_000068.7:-:155258647_155258705	3.33
novel_mir2357	66	miRNA	NC_000073.6:-:142685571_142685643	2.34
novel_mir2358	231	miRNA	NC_000075.6:+:30916557_30916615	8.19
novel_mir2359	92	miRNA	NC_000077.6:-:23178006_23178063	3.26
novel_mir2360	87	miRNA	NC_000085.6:-:31207819_31207874	3.08
novel_mir2361	44	miRNA	NC_000078.6:-:5572214_5572302	1.56
novel_mir2364	83	miRNA	NC_000071.6:-:143220343_143220410	2.94
novel_mir2365	64	miRNA	NC_000067.6:-:37452519_37452567	2.27
novel_mir2368	154	miRNA	NC_000068.7:+:161388004_161388055	5.46
novel_mir2369	34	miRNA	NC_000075.6:-:98617166_98617231	1.2
novel_mir2370	199	miRNA	NC_000073.6:-:98358354_98358411	7.05
novel_mir2372	10	miRNA	NC_000080.6:-:103030224_103030312	0.35
novel_mir2377	43	miRNA	NC_000070.6:+:108356503_108356580	1.52
novel_mir2378	148	miRNA	NC_000067.6:+:39593078_39593151	5.24
novel_mir2379	611	miRNA	NC_000069.6:+:127021225_127021312	21.65
novel_mir2382	51	miRNA	NC_000073.6:-:82994038_82994095	1.81
novel_mir2383	32	miRNA	NC_000072.6:+:128364525_128364596	1.13
novel_mir2385	77	miRNA	NC_000078.6:-:8879435_8879508	2.73
novel_mir2386	124	miRNA	NC_000081.6:-:13680779_13680856	4.39
novel_mir893	46	miRNA	NC_000069.6:-:48588180_48588262	1.63
novel_mir2390	82	miRNA	NC_000069.6:-:144316170_144316224	2.91
novel_mir2392	53	miRNA	NT_187019.1:+:7630_7695	1.88
novel_mir2393	41	miRNA	NC_000080.6:-:16591229_16591276	1.45
novel_mir2394	429	miRNA	NC_000074.6:-:93599819_93599878	15.2
novel_mir2396	158	miRNA	NC_000079.6:+:43495251_43495294	5.6
novel_mir2397	53	miRNA	NC_000082.6:+:35462603_35462670	1.88
novel_mir2398	104	miRNA	NC_000075.6:-:42572340_42572426	3.69
novel_mir2402	45	miRNA	NC_000075.6:-:119052551_119052603	1.59
novel_mir2403	235	miRNA	NC_000084.6:+:34259625_34259668	8.33
novel_mir2404	20	miRNA	NC_000074.6:-:39938631_39938686	0.71
novel_mir2031	147	miRNA	NC_000076.6:-:25522357_25522420	5.21
novel_mir2406	710	miRNA	NC_000071.6:-:6293853_6293906	25.16
novel_mir2407	71	miRNA	NC_000075.6:-:34760304_34760377	2.52
novel_mir2408	70	miRNA	NC_000081.6:+:45223561_45223634	2.48
novel_mir2409	28	miRNA	NC_000080.6:+:21025294_21025382	0.99
novel_mir2101	73	miRNA	NC_000070.6:+:141778678_141778753	2.59
novel_mir2412	425	miRNA	NC_000067.6:+:37021187_37021231	15.06
novel_mir2413	301	miRNA	NC_000073.6:+:116614873_116614936	10.67
novel_mir2414	165	miRNA	NC_000071.6:-:147008706_147008775	5.85
novel_mir2415	41	miRNA	NC_000085.6:-:59799462_59799503	1.45
novel_mir2418	96	miRNA	NC_000076.6:-:75900860_75900936	3.4
novel_mir2419	19	miRNA	NC_000073.6:+:56305629_56305686	0.67
novel_mir2420	38	miRNA	NC_000081.6:+:77696054_77696115	1.35
novel_mir2421	99	miRNA	NC_000070.6:+:62879185_62879268	3.51
novel_mir2422	24	miRNA	NC_000071.6:-:21121289_21121348	0.85
novel_mir2423	170	miRNA	NC_000071.6:-:131007185_131007269	6.02
novel_mir2425	68	miRNA	NC_000072.6:+:114476752_114476801	2.41
novel_mir2426	192	miRNA	NC_000076.6:-:74972836_74972924	6.8
novel_mir2407	31	miRNA	NC_000075.6:-:34760355_34760442	1.1
novel_mir2429	42	miRNA	NC_000075.6:-:55125810_55125859	1.49
novel_mir2430	14	miRNA	NC_000072.6:-:122528375_122528453	0.5
novel_mir2433	59	miRNA	NC_000076.6:-:92944472_92944537	2.09
novel_mir2435	31	miRNA	NT_187025.1:-:403008_403068	1.1
novel_mir2436	104	miRNA	NC_000077.6:+:88365288_88365330	3.69
novel_mir2437	18	miRNA	NC_000082.6:-:29394108_29394187	0.64
novel_mir2438	119	miRNA	NC_000076.6:-:75176824_75176881	4.22
novel_mir2439	40	miRNA	NC_000067.6:+:92611783_92611849	1.42
novel_mir2440	75	miRNA	NC_000069.6:+:9585348_9585434	2.66
novel_mir2442	101	miRNA	NC_000069.6:-:38229699_38229760	3.58
novel_mir2444	134	miRNA	NC_000077.6:-:49991134_49991208	4.75
novel_mir2446	26	miRNA	NC_000071.6:-:57720452_57720519	0.92
novel_mir2447	30	miRNA	NC_000076.6:+:29056157_29056233	1.06
novel_mir2448	78	miRNA	NC_000077.6:+:117579414_117579467	2.76
novel_mir2449	68	miRNA	NC_000080.6:-:29216277_29216354	2.41
novel_mir2450	66	miRNA	NC_000072.6:+:125533648_125533689	2.34
novel_mir2453	45	miRNA	NC_000073.6:-:121227734_121227807	1.59
novel_mir2454	164	miRNA	NC_000080.6:+:36754890_36754940	5.81
novel_mir2456	65	miRNA	NC_000084.6:+:88013643_88013703	2.3
novel_mir2459	167	miRNA	NC_000070.6:+:111424678_111424742	5.92
novel_mir238	84	miRNA	NC_000082.6:+:91904184_91904243	2.98
novel_mir2461	10	miRNA	NC_000080.6:-:59567836_59567914	0.35
novel_mir1255	58	miRNA	NC_000069.6:-:130404730_130404812	2.06
novel_mir2462	13	miRNA	NC_000071.6:+:88839107_88839174	0.46
novel_mir2463	47	miRNA	NC_000077.6:-:72658834_72658907	1.67
novel_mir2466	93	miRNA	NC_000069.6:-:57954436_57954495	3.3
novel_mir2467	37	miRNA	NC_000077.6:-:64921942_64922006	1.31
novel_mir2469	61	miRNA	NC_000086.7:+:149679448_149679503	2.16
novel_mir2470	89	miRNA	NC_000069.6:+:57883655_57883695	3.15
novel_mir2473	54	miRNA	NC_000086.7:+:70438136_70438192	1.91
novel_mir2474	31	miRNA	NC_000072.6:+:50279244_50279330	1.1
novel_mir2475	51	miRNA	NC_000073.6:-:119504208_119504264	1.81
novel_mir2476	35	miRNA	NC_000070.6:+:137527061_137527148	1.24
novel_mir2477	141	miRNA	NC_000085.6:-:52677438_52677524	5
novel_mir2478	116	miRNA	NC_000075.6:+:87855058_87855128	4.11
novel_mir2480	45	miRNA	NC_000067.6:-:99273849_99273910	1.59
novel_mir2481	138	miRNA	NC_000073.6:+:123238817_123238907	4.89
novel_mir712	38	miRNA	NC_000085.6:-:5059824_5059880	1.35
novel_mir2485	39	miRNA	NC_000075.6:-:87902282_87902372	1.38
novel_mir2486	35	miRNA	NC_000069.6:+:126592884_126592953	1.24
novel_mir2487	65	miRNA	NC_000076.6:+:38468571_38468621	2.3
novel_mir2489	796	miRNA	NC_000070.6:-:57566617_57566676	28.21
novel_mir2490	51	miRNA	NC_000079.6:+:109806289_109806366	1.81
novel_mir2491	112	miRNA	NC_000072.6:-:39116351_39116436	3.97
novel_mir2493	51	miRNA	NC_000070.6:-:126121753_126121794	1.81
novel_mir2494	41	miRNA	NC_000075.6:-:9909060_9909146	1.45
novel_mir2495	118	miRNA	NC_000070.6:-:82669122_82669162	4.18
novel_mir2236	113	miRNA	NC_000069.6:+:26843359_26843433	4
novel_mir2497	69	miRNA	NC_000074.6:+:17708504_17708574	2.45
novel_mir2498	12	miRNA	NC_000077.6:-:23089516_23089573	0.43
novel_mir2502	46	miRNA	NC_000068.7:+:173671032_173671119	1.63
novel_mir2504	61	miRNA	NC_000072.6:+:58063461_58063542	2.16
novel_mir2505	176	miRNA	NC_000076.6:-:17710262_17710351	6.24
novel_mir825	46	miRNA	NC_000075.6:-:120746523_120746624	1.63
novel_mir2506	89	miRNA	NC_000071.6:+:124158686_124158729	3.15
novel_mir2508	47	miRNA	NC_000080.6:-:96538585_96538650	1.67
novel_mir2511	63	miRNA	NC_000086.7:+:41506901_41506959	2.23
novel_mir2514	98	miRNA	NC_000076.6:-:59563277_59563328	3.47
novel_mir2516	31	miRNA	NC_000082.6:+:10345804_10345852	1.1
novel_mir2517	75	miRNA	NC_000078.6:+:25073652_25073732	2.66
novel_mir2519	50	miRNA	NC_000071.6:+:134531355_134531438	1.77
novel_mir2521	100	miRNA	NC_000068.7:-:90489271_90489350	3.54
novel_mir2522	89	miRNA	NC_000071.6:-:72971598_72971657	3.15
novel_mir2526	22	miRNA	NC_000079.6:+:94827896_94827974	0.78
novel_mir2527	54	miRNA	NC_000070.6:-:28964147_28964215	1.91
novel_mir2528	65	miRNA	NC_000081.6:+:93560463_93560512	2.3
novel_mir2529	31	miRNA	NC_000076.6:+:81267552_81267617	1.1
novel_mir2531	73	miRNA	NC_000079.6:-:118364024_118364093	2.59
novel_mir2535	130	miRNA	NC_000085.6:+:37656771_37656816	4.61
novel_mir2536	95	miRNA	NC_000085.6:+:53670823_53670864	3.37
novel_mir227	116	miRNA	NC_000068.7:-:9959831_9959923	4.11
novel_mir2537	111	miRNA	NC_000069.6:-:116313040_116313106	3.93
novel_mir2538	108	miRNA	NC_000084.6:+:39336672_39336745	3.83
novel_mir2135	42	miRNA	NC_000069.6:-:124222330_124222398	1.49
novel_mir2540	74	miRNA	NC_000077.6:-:20296575_20296614	2.62
novel_mir2541	51	miRNA	NC_000080.6:+:55569077_55569142	1.81
novel_mir2544	55	miRNA	NC_000067.6:-:165422087_165422153	1.95
novel_mir2546	29	miRNA	NC_000085.6:+:43053359_43053435	1.03
novel_mir2547	13	miRNA	NC_000085.6:-:50391390_50391452	0.46
novel_mir2548	72	miRNA	NC_000073.6:+:6043313_6043394	2.55
novel_mir2549	45	miRNA	NC_000069.6:-:40131771_40131813	1.59
novel_mir2550	169	miRNA	NC_000080.6:-:87154653_87154714	5.99
novel_mir2551	96	miRNA	NC_000074.6:-:71028064_71028126	3.4
novel_mir2554	71	miRNA	NC_000071.6:-:52511371_52511443	2.52
novel_mir2555	118	miRNA	NC_000081.6:+:94190374_94190447	4.18
novel_mir2558	42	miRNA	NC_000079.6:+:31519384_31519447	1.49
novel_mir2560	45	miRNA	NC_000068.7:+:79397947_79397997	1.59
novel_mir2561	50	miRNA	NC_000071.6:-:25483798_25483862	1.77
novel_mir2563	107	miRNA	NC_000077.6:+:76288938_76288980	3.79
novel_mir2564	101	miRNA	NC_000074.6:+:12915946_12916015	3.58
novel_mir2565	169	miRNA	NC_000085.6:-:43667973_43668031	5.99
novel_mir2568	29	miRNA	NC_000071.6:+:146695593_146695678	1.03
novel_mir2572	57	miRNA	NC_000076.6:+:13426093_13426143	2.02
novel_mir2573	46	miRNA	NC_000075.6:+:39058115_39058185	1.63
novel_mir2575	58	miRNA	NC_000077.6:-:10817338_10817386	2.06
novel_mir2577	75	miRNA	NC_000084.6:+:13527245_13527291	2.66
novel_mir2579	45	miRNA	NC_000081.6:+:97763101_97763174	1.59
novel_mir2580	24	miRNA	NC_000069.6:+:85653929_85654002	0.85
novel_mir2582	14	miRNA	NC_000068.7:-:167424643_167424719	0.5
novel_mir2583	21	miRNA	NC_000080.6:-:109340677_109340760	0.74
novel_mir2585	47	miRNA	NC_000070.6:+:123836483_123836559	1.67
novel_mir2586	142	miRNA	NC_000069.6:-:28699889_28699938	5.03
novel_mir2590	74	miRNA	NC_000071.6:-:115293876_115293954	2.62
novel_mir2591	123	miRNA	NC_000079.6:+:51332925_51333006	4.36
novel_mir2592	12	miRNA	NC_000067.6:+:178884216_178884263	0.43
novel_mir2593	64	miRNA	NC_000081.6:-:61507738_61507822	2.27
novel_mir2594	81	miRNA	NC_000071.6:-:129009705_129009752	2.87
novel_mir2596	33	miRNA	NC_000072.6:-:17405115_17405178	1.17
novel_mir2597	1781	miRNA	NC_000075.6:-:12205861_12205966	63.11
novel_mir2598	122	miRNA	NC_000078.6:+:71299305_71299367	4.32
[truncated: 1,897 more rows]

## Sheet: Positive control group
sRNA id	Count(24939378)	Type	Description	TPM
mmu-miR-1843a-5p	20	mature	mir-1843	0.8
mmu-miR-378a-3p	852	mature	mir-378	34.16
mmu-miR-130a-3p	3	mature	mir-130	0.12
mmu-miR-17-5p	8	mature	mir-17	0.32
mmu-miR-28a-3p	45	mature	mir-28	1.8
mmu-miR-485-5p	26	mature	mir-485	1.04
mmu-miR-215-5p	200	mature	mir-192	8.02
mmu-miR-375-3p	1864	mature	mir-375	74.74
mmu-miR-379-5p	37	mature	mir-379	1.48
mmu-miR-9b-3p	28	mature	undef	1.12
mmu-miR-199a-3p,mmu-miR-199b-3p	21	mature	mir-199	0.84
mmu-miR-23b-5p	2	mature	mir-23	0.08
mmu-let-7f-5p	1430	mature	let-7	57.34
mmu-miR-8107	4	mature	undef	0.16
mmu-miR-350-3p	3	mature	mir-350	0.12
mmu-miR-1943-3p	1	mature	undef	0.04
mmu-miR-298-3p	3	mature	mir-298	0.12
mmu-miR-542-5p	41	mature	mir-542	1.64
mmu-miR-429-3p	946	mature	mir-8	37.93
mmu-miR-10b-5p	372	mature	mir-10	14.92
mmu-miR-204-3p	5	mature	mir-204	0.2
mmu-miR-487b-3p	7	mature	mir-154	0.28
mmu-miR-598-3p	1	mature	mir-598	0.04
mmu-miR-484	877	mature	mir-484	35.17
mmu-miR-224-5p	41	mature	mir-224	1.64
mmu-miR-3057-5p	10	mature	undef	0.4
mmu-miR-9-3p	5	mature	mir-9	0.2
mmu-miR-184-3p	44	mature	mir-184	1.76
mmu-miR-470-5p	13	mature	mir-743	0.52
mmu-miR-221-3p	4	mature	mir-221	0.16
mmu-miR-15a-3p	1	mature	mir-15	0.04
mmu-miR-20a-5p	14	mature	mir-17	0.56
mmu-miR-8116	11	mature	undef	0.44
mmu-miR-1839-5p	81	mature	mir-1839	3.25
mmu-miR-744-3p	3	mature	mir-744	0.12
mmu-miR-449a-5p	37	mature	mir-449	1.48
mmu-miR-378b	63	mature	mir-378	2.53
mmu-miR-139-3p	4	mature	mir-139	0.16
mmu-miR-433-3p	1	mature	mir-433	0.04
mmu-miR-215-3p	33	mature	mir-192	1.32
mmu-miR-34a-5p	606	mature	mir-34	24.3
mmu-miR-1a-3p	237	mature	mir-1	9.5
mmu-miR-7667-5p	1	mature	undef	0.04
mmu-miR-93-5p	411	mature	mir-17	16.48
mmu-miR-339-3p	6	mature	mir-339	0.24
mmu-miR-151-3p	100	mature	mir-28	4.01
mmu-miR-183-5p	13	mature	mir-183	0.52
mmu-miR-5099	2	mature	undef	0.08
mmu-miR-1247-5p	2	mature	mir-1247	0.08
mmu-miR-301a-3p	12	mature	mir-130	0.48
mmu-miR-486a-3p	60	mature	mir-486	2.41
mmu-miR-5114	2	mature	undef	0.08
mmu-miR-297a-5p	49	mature	mir-297	1.96
mmu-miR-425-5p	61	mature	mir-425	2.45
mmu-miR-127-3p	317	mature	mir-127	12.71
mmu-miR-7058-5p	1	mature	undef	0.04
mmu-let-7d-3p	250	mature	let-7	10.02
mmu-miR-7232-3p	1	mature	undef	0.04
mmu-miR-30b-5p	1072	mature	mir-30	42.98
mmu-miR-28a-5p	1	mature	mir-28	0.04
mmu-miR-675-3p	20	mature	mir-675	0.8
mmu-miR-141-3p	37	mature	mir-8	1.48
mmu-miR-18b-5p	2	mature	mir-17	0.08
mmu-miR-21a-5p	9804	mature	mir-21	393.11
mmu-let-7d-5p	421	mature	let-7	16.88
mmu-miR-23b-3p	9	mature	mir-23	0.36
mmu-miR-98-5p	94	mature	let-7	3.77
mmu-miR-24-2-5p	37	mature	mir-24	1.48
mmu-miR-411-5p	132	mature	mir-379	5.29
mmu-miR-6546-3p	7	mature	undef	0.28
mmu-miR-124-3p	3	mature	mir-124	0.12
mmu-miR-106b-5p	3	mature	mir-17	0.12
mmu-miR-1193-3p	1	mature	mir-1193	0.04
mmu-miR-101a-3p	1	mature	mir-101	0.04
mmu-miR-193a-3p	1	mature	mir-193	0.04
mmu-miR-466i-5p	13	mature	mir-467	0.52
mmu-miR-92b-3p	105	mature	mir-25	4.21
mmu-miR-203b-3p	1	mature	undef	0.04
mmu-miR-20b-5p	2	mature	mir-17	0.08
mmu-miR-410-3p	4	mature	mir-154	0.16
mmu-let-7i-5p	3079	mature	let-7	123.46
mmu-miR-27a-3p	2190	mature	mir-27	87.81
mmu-miR-21a-3p	1	mature	mir-21	0.04
mmu-miR-181c-5p	137	mature	mir-181	5.49
mmu-miR-22-3p	12856	mature	mir-22	515.49
mmu-miR-212-3p	4	mature	mir-132	0.16
mmu-miR-451a	26468	mature	mir-451	1061.29
mmu-miR-206-3p	570	mature	mir-1	22.86
mmu-miR-346-5p	4	mature	mir-346	0.16
mmu-miR-188-5p	3	mature	mir-188	0.12
mmu-miR-182-5p	1	mature	mir-182	0.04
mmu-miR-871-5p	5	mature	mir-743	0.2
mmu-miR-338-5p	2	mature	mir-338	0.08
mmu-miR-30a-3p	13	mature	mir-30	0.52
mmu-miR-154-5p	31	mature	mir-154	1.24
mmu-miR-7a-5p	308	mature	mir-7	12.35
mmu-miR-877-3p	11	mature	mir-877	0.44
mmu-miR-181a-2-3p	1	mature	mir-181	0.04
mmu-miR-300-3p	1	mature	mir-154	0.04
mmu-miR-99a-5p	2938	mature	mir-10	117.81
mmu-miR-1249-3p	1	mature	mir-1249	0.04
mmu-miR-1b-5p	1	mature	mir-1	0.04
mmu-miR-6943-3p	1	mature	undef	0.04
mmu-miR-450a-5p	8	mature	mir-450	0.32
mmu-miR-574-5p	3	mature	mir-574	0.12
mmu-miR-145a-3p	7	mature	mir-145	0.28
mmu-miR-434-3p	12	mature	mir-434	0.48
mmu-miR-182-3p	7	mature	mir-182	0.28
mmu-miR-3084-5p	6	mature	mir-3084	0.24
mmu-miR-135b-5p	1	mature	mir-135	0.04
mmu-miR-140-5p	91	mature	mir-140	3.65
mmu-miR-3074-2-3p	34	mature	mir-3074	1.36
mmu-miR-200b-3p	4	mature	mir-8	0.16
mmu-miR-423-5p	26	mature	mir-423	1.04
mmu-miR-1191a	10	mature	undef	0.4
mmu-miR-30d-5p	995	mature	mir-30	39.9
mmu-miR-320-3p	139	mature	mir-320	5.57
mmu-miR-223-3p	415	mature	mir-223	16.64
mmu-miR-34b-3p	4	mature	mir-34	0.16
mmu-let-7a-1-3p,mmu-let-7c-2-3p	18	mature	let-7	0.72
mmu-miR-196b-5p	894	mature	mir-196	35.85
mmu-miR-192-3p	1	mature	mir-192	0.04
mmu-miR-30e-5p	4	mature	mir-30	0.16
mmu-miR-187-3p	43	mature	mir-187	1.72
mmu-miR-466g	1	mature	mir-467	0.04
mmu-let-7e-3p	21	mature	let-7	0.84
mmu-miR-7024-5p	1	mature	undef	0.04
mmu-miR-125a-5p	2	mature	mir-10	0.08
mmu-miR-130b-5p	3	mature	mir-130	0.12
mmu-miR-138-5p	18	mature	mir-138	0.72
mmu-miR-30c-5p	1	mature	mir-30	0.04
mmu-miR-381-3p	9	mature	mir-154	0.36
mmu-miR-193b-3p	90	mature	mir-193	3.61
mmu-miR-543-5p	1	mature	mir-329	0.04
mmu-miR-181a-1-3p	1	mature	mir-181	0.04
mmu-miR-139-5p	761	mature	mir-139	30.51
mmu-miR-669l-5p	2	mature	mir-467	0.08
mmu-miR-125b-5p	12	mature	mir-10	0.48
mmu-miR-1964-3p	33	mature	undef	1.32
mmu-miR-877-5p	15	mature	mir-877	0.6
mmu-miR-374b-5p	22	mature	mir-374	0.88
mmu-miR-191-3p	19	mature	mir-191	0.76
mmu-miR-467e-5p	5	mature	mir-467	0.2
mmu-miR-26a-5p	840	mature	mir-26	33.68
mmu-miR-16-5p	5151	mature	mir-15	206.54
mmu-miR-3470a	3	mature	mir-3470	0.12
mmu-miR-218-5p	43	mature	mir-218	1.72
mmu-miR-143-3p	1430	mature	mir-143	57.34
mmu-miR-101b-3p	146	mature	mir-101	5.85
mmu-miR-185-5p	244	mature	mir-185	9.78
mmu-miR-15b-5p	14	mature	mir-15	0.56
mmu-miR-138-2-3p	1	mature	mir-138	0.04
mmu-miR-615-3p	7	mature	mir-615	0.28
mmu-miR-122-3p	1	mature	mir-122	0.04
mmu-miR-129b-5p	2	mature	mir-129	0.08
mmu-miR-423-3p	1255	mature	mir-423	50.32
mmu-miR-30d-3p	1	mature	mir-30	0.04
mmu-miR-194-5p	3	mature	mir-194	0.12
mmu-miR-501-3p	7	mature	mir-500	0.28
mmu-miR-181b-5p	1	mature	mir-181	0.04
mmu-miR-8112	15	mature	undef	0.6
mmu-miR-219a-5p	1	mature	mir-219	0.04
mmu-miR-421-5p	2	mature	mir-95	0.08
mmu-miR-98-3p	1	mature	let-7	0.04
mmu-miR-142a-3p	3	mature	mir-142	0.12
mmu-miR-140-3p	61	mature	mir-140	2.45
mmu-miR-6991-3p	2	mature	undef	0.08
mmu-miR-26b-5p	103	mature	mir-26	4.13
mmu-miR-34b-5p	1	mature	mir-34	0.04
mmu-miR-361-5p	2	mature	mir-361	0.08
mmu-miR-99b-5p	230	mature	mir-10	9.22
mmu-miR-186-5p	4	mature	mir-186	0.16
mmu-miR-342-5p	1	mature	mir-342	0.04
mmu-miR-322-5p	15	mature	mir-322	0.6
mmu-miR-5126	73	mature	undef	2.93
mmu-miR-6961-5p	7	mature	undef	0.28
mmu-miR-669c-5p	14	mature	mir-467	0.56
mmu-miR-471-3p	2	mature	mir-471	0.08
mmu-miR-210-3p	3	mature	mir-210	0.12
mmu-miR-328-3p	1800	mature	mir-328	72.18
mmu-miR-200c-3p	1	mature	mir-8	0.04
mmu-miR-467c-5p	3	mature	mir-467	0.12
mmu-miR-8091	1	mature	undef	0.04
mmu-miR-384-5p	4	mature	mir-384	0.16
mmu-miR-652-3p	3562	mature	mir-652	142.83
mmu-miR-126a-3p	682	mature	mir-126	27.35
mmu-miR-214-3p	3	mature	mir-214	0.12
mmu-let-7a-5p	1708	mature	let-7	68.49
mmu-miR-202-5p	3	mature	mir-202	0.12
mmu-miR-322-3p	7	mature	mir-322	0.28
mmu-miR-872-5p	208	mature	mir-872	8.34
mmu-miR-500-3p	5	mature	mir-500	0.2
mmu-let-7e-5p	4	mature	let-7	0.16
mmu-miR-425-3p	68	mature	mir-425	2.73
mmu-miR-153-3p	1	mature	mir-153	0.04
mmu-miR-5103	7	mature	undef	0.28
mmu-miR-326-3p	147	mature	mir-326	5.89
mmu-miR-3470b	1	mature	mir-3470	0.04
mmu-miR-93-3p	1	mature	mir-17	0.04
mmu-miR-204-5p	151	mature	mir-204	6.05
mmu-miR-210-5p	1	mature	mir-210	0.04
mmu-miR-450b-3p	9	mature	mir-450	0.36
mmu-miR-503-3p	46	mature	mir-503	1.84
mmu-miR-190b-5p	7	mature	mir-190	0.28
mmu-miR-486b-3p	97	mature	mir-486	3.89
mmu-miR-574-3p	209	mature	mir-574	8.38
mmu-miR-151-5p	203	mature	mir-28	8.14
mmu-miR-6900-3p	1	mature	undef	0.04
mmu-miR-133a-3p	32	mature	mir-133	1.28
mmu-miR-10a-5p	1202	mature	mir-10	48.2
mmu-let-7b-5p	987	mature	let-7	39.58
mmu-miR-702-3p	1	mature	mir-702	0.04
mmu-miR-499-5p	63	mature	mir-499	2.53
mmu-miR-486a-5p,mmu-miR-486b-5p	1779	mature	mir-486	71.33
mmu-miR-30e-3p	5	mature	mir-30	0.2
mmu-miR-339-5p	4	mature	mir-339	0.16
mmu-miR-382-5p	11	mature	mir-154	0.44
mmu-miR-192-5p	2435	mature	mir-192	97.64
mmu-miR-5123	1	mature	undef	0.04
mmu-miR-378c	3	mature	undef	0.12
mmu-miR-25-3p	3559	mature	mir-25	142.71
mmu-miR-22-5p	1	mature	mir-22	0.04
mmu-miR-802-3p	3	mature	mir-802	0.12
mmu-miR-19b-3p	65	mature	mir-19	2.61
mmu-miR-676-3p	266	mature	mir-676	10.67
mmu-miR-330-3p	1	mature	mir-330	0.04
mmu-miR-132-5p	4	mature	mir-132	0.16
mmu-let-7g-5p	4098	mature	let-7	164.32
mmu-miR-669e-5p	1	mature	mir-467	0.04
mmu-miR-222-3p	49	mature	mir-221	1.96
mmu-miR-1934-5p	2	mature	undef	0.08
mmu-miR-7a-1-3p	104	mature	mir-7	4.17
mmu-miR-15b-3p	4	mature	mir-15	0.16
mmu-miR-296-5p	72	mature	mir-296	2.89
mmu-miR-128-1-5p	1	mature	mir-128	0.04
mmu-miR-1983	153	mature	undef	6.13
mmu-miR-181a-5p	131	mature	mir-181	5.25
mmu-miR-92a-3p	1435	mature	mir-25	57.54
mmu-miR-669b-5p	18	mature	mir-467	0.72
mmu-miR-146a-5p	12132	mature	mir-146	486.46
mmu-miR-30a-5p	38	mature	mir-30	1.52
mmu-miR-3068-5p	1	mature	mir-3068	0.04
mmu-miR-6538	9	mature	undef	0.36
mmu-miR-24-3p	9287	mature	mir-24	372.38
mmu-miR-223-5p	66	mature	mir-223	2.65
mmu-miR-1199-5p	1	mature	mir-1199	0.04
mmu-miR-193a-5p	1	mature	mir-193	0.04
mmu-miR-9-5p	1	mature	mir-9	0.04
mmu-miR-219a-1-3p	2	mature	mir-219	0.08
mmu-miR-450a-2-3p	2	mature	mir-450	0.08
mmu-miR-122-5p	9545	mature	mir-122	382.73
mmu-miR-1247-3p	8	mature	mir-1247	0.32
mmu-miR-27a-5p	1	mature	mir-27	0.04
mmu-miR-196a-5p	13	mature	mir-196	0.52
mmu-miR-369-5p	11	mature	mir-154	0.44
mmu-miR-134-5p	12	mature	mir-134	0.48
mmu-miR-1198-5p	5963	mature	undef	239.1
mmu-miR-532-5p	6	mature	mir-188	0.24
mmu-miR-6933-5p	4	mature	undef	0.16
mmu-miR-341-5p	1	mature	mir-341	0.04
mmu-miR-146b-5p	5	mature	mir-146	0.2
mmu-miR-203-3p	15	mature	mir-203	0.6
mmu-miR-365-3p	8	mature	mir-365	0.32
mmu-miR-341-3p	100	mature	mir-341	4.01
mmu-miR-1981-5p	2	mature	undef	0.08
mmu-miR-23a-3p	2806	mature	mir-23	112.51
mmu-miR-100-5p	500	mature	mir-10	20.05
mmu-miR-155-5p	2	mature	mir-155	0.08
mmu-miR-466h-3p	1	mature	mir-467	0.04
mmu-miR-3084-3p	3	mature	mir-3084	0.12
mmu-miR-3473b	1	mature	mir-3473	0.04
mmu-miR-1306-3p	23	mature	mir-1306	0.92
mmu-miR-669f-5p	1	mature	mir-467	0.04
mmu-miR-145a-5p	139	mature	mir-145	5.57
mmu-miR-27b-3p	712	mature	mir-27	28.55
mmu-miR-342-3p	129	mature	mir-342	5.17
mmu-miR-7682-3p	2	mature	undef	0.08
mmu-miR-15a-5p	100	mature	mir-15	4.01
mmu-miR-149-5p	77	mature	mir-149	3.09
mmu-miR-3095-3p	4	mature	undef	0.16
mmu-miR-467a-5p	5	mature	mir-467	0.2
mmu-miR-128-3p	510	mature	mir-128	20.45
mmu-miR-29a-3p	21	mature	mir-29	0.84
mmu-miR-144-3p	18	mature	mir-144	0.72
mmu-miR-1970	3	mature	undef	0.12
mmu-miR-3102-5p.2-5p	3	mature	mir-3102	0.12
mmu-miR-31-5p	27	mature	mir-31	1.08
mmu-miR-872-3p	61	mature	mir-872	2.45
mmu-miR-7043-3p	7	mature	undef	0.28
mmu-miR-195a-3p	2	mature	mir-15	0.08
mmu-miR-7658-3p	1	mature	undef	0.04
mmu-miR-148a-3p	57	mature	mir-148	2.29
mmu-miR-652-5p	1	mature	mir-652	0.04
mmu-miR-18a-5p	1	mature	mir-17	0.04
mmu-miR-6971-3p	2	mature	undef	0.08
mmu-miR-672-5p	2	mature	mir-672	0.08
mmu-miR-200a-3p	40	mature	mir-8	1.6
mmu-miR-103-2-5p	1	mature	mir-103	0.04
mmu-miR-181d-5p	76	mature	mir-181	3.05
mmu-miR-148b-3p	2	mature	mir-148	0.08
mmu-miR-201-5p	1	mature	mir-743	0.04
mmu-miR-351-5p	8	mature	mir-351	0.32
mmu-miR-7240-5p	2	mature	undef	0.08
mmu-miR-205-5p	20	mature	mir-205	0.8
mmu-miR-33-5p	17	mature	mir-33	0.68
mmu-miR-490-5p	40	mature	mir-490	1.6
mmu-miR-219a-2-3p	36	mature	mir-219	1.44
mmu-miR-7689-3p	2	mature	undef	0.08
mmu-miR-150-5p	1037	mature	mir-150	41.58
mmu-miR-547-3p	1	mature	mir-547	0.04
mmu-miR-671-5p	9	mature	mir-671	0.36
mmu-miR-99b-3p	6	mature	mir-10	0.24
mmu-miR-34c-3p	4	mature	mir-34	0.16
mmu-miR-409-3p	9	mature	mir-154	0.36
mmu-miR-465c-5p	1	mature	mir-465	0.04
mmu-miR-410-5p	1	mature	mir-154	0.04
mmu-miR-378a-5p	11	mature	mir-378	0.44
mmu-miR-6959-5p	2	mature	undef	0.08
mmu-miR-5104b-5p	4	mature	undef	0.16
mmu-miR-203b-5p	1	mature	undef	0.04
mmu-miR-712-3p	2	mature	undef	0.08
mmu-miR-126a-5p	6	mature	mir-126	0.24
mmu-miR-350-5p	1	mature	mir-350	0.04
mmu-miR-465a-3p,mmu-miR-465b-3p,mmu-miR-465c-3p	10	mature	mir-465	0.4
mmu-miR-129-5p	4	mature	mir-129	0.16
mmu-let-7c-5p	1675	mature	let-7	67.16
mmu-miR-1947-5p	4	mature	undef	0.16
mmu-miR-191-5p	7475	mature	mir-191	299.73
mmu-miR-142a-5p	8	mature	mir-142	0.32
mmu-miR-29b-3p	2	mature	mir-29	0.08
mmu-miR-18a-3p	13	mature	mir-17	0.52
novel_mir1	26472	miRNA	NC_000076.6:-:91181413_91181483	1061.45
novel_mir2	41	miRNA	NC_000071.6:+:123330830_123330893	1.64
novel_mir3	103	miRNA	NC_000068.7:-:170257941_170258043	4.13
novel_mir4	148	miRNA	NC_000067.6:+:35999106_35999150	5.93
novel_mir6	410	miRNA	NC_000086.7:-:153726355_153726415	16.44
novel_mir7	23	miRNA	NC_000071.6:-:60672514_60672591	0.92
novel_mir8	10	miRNA	NC_000080.6:-:70418968_70419036	0.4
novel_mir11	68	miRNA	NC_000068.7:-:162133623_162133675	2.73
novel_mir12	20	miRNA	NC_000077.6:+:118575166_118575257	0.8
novel_mir16	53	miRNA	NC_000067.6:-:188833430_188833485	2.13
novel_mir20	56	miRNA	NC_000068.7:-:112168767_112168826	2.25
novel_mir22	22	miRNA	NT_187009.1:-:923079_923134	0.88
novel_mir33	12	miRNA	NC_000068.7:+:22589657_22589745	0.48
novel_mir43	178	miRNA	NC_000071.6:-:99978470_99978516	7.14
novel_mir50	11	miRNA	NC_000078.6:-:106554028_106554071	0.44
novel_mir54	140	miRNA	NC_000077.6:-:45980271_45980363	5.61
novel_mir60	237	miRNA	NC_000074.6:-:123155711_123155747	9.5
novel_mir62	101	miRNA	NC_000069.6:-:145758824_145758869	4.05
novel_mir70	12	miRNA	NC_000086.7:-:65923024_65923100	0.48
novel_mir78	799	miRNA	NC_000076.6:-:80549436_80549484	32.04
novel_mir80	17	miRNA	NC_000083.6:-:5841146_5841209	0.68
novel_mir81	549	miRNA	NC_000079.6:+:43481285_43481337	22.01
novel_mir82	92	miRNA	NC_000068.7:+:181459529_181459621	3.69
novel_mir82	79	miRNA	NC_000068.7:+:181459598_181459664	3.17
novel_mir83	191	miRNA	NC_000068.7:-:92183556_92183644	7.66
novel_mir85	23	miRNA	NC_000076.6:+:81559311_81559391	0.92
novel_mir86	15	miRNA	NC_000073.6:-:80390965_80391057	0.6
novel_mir87	233	miRNA	NC_000081.6:-:102203956_102204024	9.34
novel_mir88	679	miRNA	NC_000068.7:+:163054762_163054825	27.23
novel_mir80	1339	miRNA	NC_000083.6:-:5841110_5841167	53.69
novel_mir91	86	miRNA	NC_000073.6:+:81859270_81859350	3.45
novel_mir94	84	miRNA	NC_000069.6:+:95659166_95659229	3.37
novel_mir96	19	miRNA	NC_000086.7:-:20291537_20291606	0.76
novel_mir98	380	miRNA	NC_000083.6:-:46031750_46031799	15.24
novel_mir99	21	miRNA	NC_000081.6:-:98296233_98296276	0.84
novel_mir102	63	miRNA	NC_000085.6:-:3455465_3455513	2.53
novel_mir105	1839	miRNA	NC_000081.6:-:75748234_75748287	73.74
novel_mir106	145	miRNA	NT_187005.1:-:1312610_1312696	5.81
novel_mir108	1580	miRNA	NC_000068.7:+:162660772_162660816	63.35
novel_mir110	10	miRNA	NC_000086.7:+:8074616_8074665	0.4
novel_mir111	10	miRNA	NC_000085.6:+:59345354_59345408	0.4
novel_mir112	26	miRNA	NC_000070.6:+:63261654_63261739	1.04
novel_mir118	17	miRNA	NC_000075.6:-:108649316_108649362	0.68
novel_mir119	149	miRNA	NC_000071.6:-:137531454_137531494	5.97
novel_mir122	27	miRNA	NC_000078.6:+:40446585_40446665	1.08
novel_mir124	540	miRNA	NC_000083.6:-:36032419_36032461	21.65
novel_mir127	739	miRNA	NC_000075.6:-:20642110_20642160	29.63
novel_mir130	27	miRNA	NC_000073.6:-:127232910_127232978	1.08
novel_mir132	10	miRNA	NC_000071.6:-:93093102_93093171	0.4
novel_mir133	284	miRNA	NC_000073.6:-:127614726_127614789	11.39
novel_mir135	272	miRNA	NC_000069.6:+:89090487_89090577	10.91
novel_mir140	140	miRNA	NC_000068.7:+:164071224_164071286	5.61
novel_mir144	23	miRNA	NC_000083.6:+:43824957_43825038	0.92
novel_mir169	1019	miRNA	NC_000068.7:-:165728943_165729012	40.86
novel_mir170	25	miRNA	NC_000076.6:-:70223176_70223260	1
novel_mir171	15	miRNA	NC_000081.6:-:99239742_99239814	0.6
novel_mir172	13	miRNA	NC_000085.6:+:6251617_6251695	0.52
novel_mir173	511	miRNA	NC_000079.6:+:98925879_98925954	20.49
novel_mir174	346	miRNA	NC_000071.6:-:99728614_99728695	13.87
novel_mir176	516	miRNA	NC_000069.6:-:42177626_42177701	20.69
novel_mir178	20	miRNA	NC_000086.7:+:129750677_129750743	0.8
novel_mir179	88	miRNA	NC_000078.6:-:55398665_55398719	3.53
novel_mir181	140	miRNA	NC_000070.6:-:141893114_141893172	5.61
novel_mir183	38	miRNA	NC_000078.6:-:100199358_100199409	1.52
novel_mir184	16	miRNA	NC_000077.6:-:95600685_95600771	0.64
novel_mir187	1527	miRNA	NC_000073.6:-:139894848_139894921	61.23
novel_mir193	360	miRNA	NC_000086.7:-:73659266_73659307	14.44
novel_mir197	31	miRNA	NC_000068.7:-:156576326_156576401	1.24
novel_mir201	89	miRNA	NC_000074.6:-:123834471_123834536	3.57
novel_mir210	39	miRNA	NC_000073.6:+:141631188_141631256	1.56
novel_mir215	79	miRNA	NC_000080.6:-:55887309_55887386	3.17
novel_mir219	39	miRNA	NC_000077.6:-:119870701_119870768	1.56
novel_mir222	82	miRNA	NC_000075.6:-:91365920_91365983	3.29
novel_mir226	12	miRNA	NC_000071.6:+:130222295_130222372	0.48
novel_mir232	401	miRNA	NC_000071.6:+:34187172_34187219	16.08
novel_mir233	14	miRNA	NC_000069.6:+:107443551_107443635	0.56
novel_mir234	61	miRNA	NC_000083.6:-:33551318_33551398	2.45
novel_mir235	11	miRNA	NC_000076.6:-:123196934_123197001	0.44
novel_mir237	101	miRNA	NC_000076.6:-:26374343_26374407	4.05
novel_mir226	15	miRNA	NC_000071.6:+:130222273_130222313	0.6
novel_mir255	1025	miRNA	NC_000067.6:+:191906818_191906885	41.1
novel_mir260	19	miRNA	NC_000073.6:-:75762483_75762575	0.76
novel_mir265	13	miRNA	NC_000072.6:+:125236478_125236520	0.52
novel_mir267	16	miRNA	NC_000071.6:-:33259686_33259738	0.64
novel_mir271	265	miRNA	NC_000070.6:+:134468406_134468448	10.63
novel_mir272	195	miRNA	NC_000072.6:-:37687054_37687104	7.82
novel_mir277	13	miRNA	NC_000075.6:-:20749951_20750033	0.52
novel_mir279	39	miRNA	NC_000082.6:-:30886410_30886485	1.56
novel_mir280	11	miRNA	NC_000068.7:-:30033123_30033182	0.44
novel_mir282	1901	miRNA	NC_000076.6:+:80857300_80857381	76.22
novel_mir285	184	miRNA	NC_000070.6:+:114339859_114339917	7.38
novel_mir288	56	miRNA	NC_000081.6:-:65503600_65503650	2.25
novel_mir307	364	miRNA	NC_000071.6:-:64802449_64802506	14.6
novel_mir316	10	miRNA	NC_000070.6:-:151761104_151761192	0.4
novel_mir319	102	miRNA	NC_000073.6:+:24450551_24450604	4.09
novel_mir336	12	miRNA	NC_000077.6:+:7071300_7071348	0.48
novel_mir340	50	miRNA	NC_000068.7:-:74661221_74661296	2
novel_mir345	11	miRNA	NC_000073.6:-:113293753_113293829	0.44
novel_mir347	103	miRNA	NC_000083.6:-:45349886_45349936	4.13
novel_mir348	65	miRNA	NC_000083.6:-:45970747_45970837	2.61
novel_mir349	23	miRNA	NC_000074.6:-:70167218_70167293	0.92
novel_mir355	59	miRNA	NC_000076.6:+:127984611_127984689	2.37
novel_mir357	198	miRNA	NC_000074.6:+:94418880_94418962	7.94
novel_mir359	73	miRNA	NC_000079.6:-:96542324_96542391	2.93
novel_mir363	262	miRNA	NC_000072.6:+:17307623_17307665	10.51
novel_mir373	21	miRNA	NC_000078.6:-:33325970_33326020	0.84
novel_mir389	21	miRNA	NC_000075.6:-:56438153_56438221	0.84
novel_mir394	24	miRNA	NC_000073.6:-:132628682_132628768	0.96
novel_mir395	41	miRNA	NC_000070.6:-:140479923_140480004	1.64
novel_mir398	10	miRNA	NT_187004.1:-:1182701_1182783	0.4
novel_mir406	61	miRNA	NC_000079.6:+:41605511_41605583	2.45
novel_mir422	15	miRNA	NC_000069.6:+:122786226_122786303	0.6
novel_mir433	142	miRNA	NC_000076.6:-:117966368_117966448	5.69
novel_mir451	14	miRNA	NC_000075.6:+:122006921_122006996	0.56
novel_mir455	69	miRNA	NC_000074.6:-:60759029_60759084	2.77
novel_mir461	38	miRNA	NC_000075.6:+:58489348_58489423	1.52
novel_mir463	114	miRNA	NC_000081.6:+:79028412_79028480	4.57
novel_mir467	61	miRNA	NC_000075.6:-:120602887_120602952	2.45
novel_mir468	1293	miRNA	NC_000084.6:+:75380583_75380647	51.85
novel_mir475	21	miRNA	NC_000076.6:-:120031503_120031575	0.84
novel_mir476	30	miRNA	NC_000074.6:+:95047129_95047182	1.2
novel_mir494	12	miRNA	NC_000075.6:-:59353395_59353472	0.48
novel_mir501	15	miRNA	NC_000079.6:-:63347860_63347945	0.6
novel_mir508	32	miRNA	NC_000083.6:+:28269734_28269797	1.28
novel_mir544	220	miRNA	NC_000077.6:-:119502694_119502743	8.82
novel_mir558	34	miRNA	NC_000073.6:+:139299557_139299603	1.36
novel_mir577	12	miRNA	NC_000075.6:-:90193855_90193927	0.48
novel_mir587	824	miRNA	NC_000074.6:+:23039294_23039360	33.04
novel_mir594	11	miRNA	NC_000076.6:-:83234908_83234953	0.44
novel_mir596	36	miRNA	NC_000067.6:+:12440152_12440203	1.44
novel_mir598	67	miRNA	NC_000070.6:+:13750689_13750760	2.69
novel_mir604	10	miRNA	NC_000070.6:+:139546038_139546094	0.4
novel_mir611	23	miRNA	NC_000075.6:-:110768805_110768847	0.92
novel_mir612	31	miRNA	NC_000085.6:-:15336269_15336329	1.24
novel_mir618	4430	miRNA	NC_000069.6:-:156578540_156578613	177.63
novel_mir626	14	miRNA	NC_000076.6:+:52340409_52340480	0.56
novel_mir628	14	miRNA	NC_000080.6:+:92988123_92988201	0.56
novel_mir633	45	miRNA	NC_000075.6:-:123555301_123555350	1.8
novel_mir639	426	miRNA	NC_000073.6:-:92669817_92669890	17.08
novel_mir650	10	miRNA	NC_000078.6:-:29974873_29974919	0.4
novel_mir679	35	miRNA	NC_000076.6:+:80030891_80030952	1.4
novel_mir680	32	miRNA	NC_000076.6:-:50504371_50504449	1.28
novel_mir684	123	miRNA	NC_000068.7:+:160232649_160232712	4.93
novel_mir696	126	miRNA	NC_000083.6:-:84186092_84186156	5.05
novel_mir700	807	miRNA	NC_000069.6:-:137950427_137950486	32.36
novel_mir701	48	miRNA	NC_000077.6:-:118709862_118709916	1.92
novel_mir711	108	miRNA	NC_000068.7:+:151751558_151751634	4.33
novel_mir727	111	miRNA	NC_000072.6:-:107644025_107644101	4.45
novel_mir553	31	miRNA	NC_000070.6:+:152349449_152349524	1.24
novel_mir729	52	miRNA	NC_000082.6:-:13928933_13928984	2.09
novel_mir764	3497	miRNA	NC_000070.6:-:132266162_132266216	140.22
novel_mir768	13	miRNA	NC_000074.6:+:126265787_126265850	0.52
novel_mir772	111	miRNA	NT_095534.1:+:53589_53637	4.45
novel_mir785	13	miRNA	NC_000076.6:-:70902564_70902649	0.52
novel_mir800	33	miRNA	NC_000083.6:-:44013193_44013231	1.32
novel_mir802	31	miRNA	NC_000071.6:+:56803986_56804049	1.24
novel_mir837	146	miRNA	NC_000070.6:+:8606486_8606563	5.85
novel_mir855	49	miRNA	NC_000075.6:-:108079010_108079083	1.96
novel_mir315	91	miRNA	NC_000078.6:+:80575609_80575681	3.65
novel_mir859	19	miRNA	NC_000070.6:+:107179298_107179344	0.76
novel_mir870	175	miRNA	NT_187023.1:-:1254037_1254083	7.02
novel_mir878	18	miRNA	NC_000069.6:+:51521758_51521796	0.72
novel_mir879	76	miRNA	NC_000072.6:+:72773361_72773444	3.05
novel_mir880	138	miRNA	NC_000077.6:+:117968516_117968557	5.53
novel_mir897	34	miRNA	NC_000069.6:-:107617417_107617492	1.36
novel_mir905	36	miRNA	NC_000086.7:+:101522533_101522603	1.44
novel_mir906	48	miRNA	NC_000067.6:+:132130697_132130781	1.92
novel_mir909	24	miRNA	NC_000074.6:-:13701532_13701579	0.96
novel_mir912	11	miRNA	NC_000068.7:-:173564818_173564864	0.44
novel_mir916	12	miRNA	NC_000067.6:-:63994402_63994469	0.48
novel_mir922	57	miRNA	NC_000081.6:-:86270247_86270288	2.29
novel_mir972	35	miRNA	NC_000076.6:-:61168681_61168735	1.4
novel_mir978	13	miRNA	NC_000068.7:-:166147192_166147250	0.52
novel_mir994	55	miRNA	NC_000078.6:+:76245084_76245144	2.21
novel_mir1004	248	miRNA	NC_000078.6:-:100088854_100088926	9.94
novel_mir1011	67	miRNA	NC_000084.6:-:11143524_11143583	2.69
novel_mir1016	13	miRNA	NC_000072.6:-:32976401_32976461	0.52
novel_mir1030	647	miRNA	NC_000077.6:+:11967536_11967586	25.94
novel_mir1039	27	miRNA	NC_000077.6:+:16508311_16508360	1.08
novel_mir1068	11	miRNA	NC_000073.6:-:40944632_40944709	0.44
novel_mir1086	351	miRNA	NC_000085.6:-:46319638_46319697	14.07
novel_mir1094	14	miRNA	NC_000073.6:-:125451652_125451706	0.56
novel_mir1108	30	miRNA	NC_000079.6:+:45405007_45405060	1.2
novel_mir1125	57	miRNA	NC_000081.6:-:36506040_36506113	2.29
novel_mir1129	13	miRNA	NC_000068.7:-:4063424_4063514	0.52
novel_mir905	851	miRNA	NC_000086.7:+:101522578_101522643	34.12
novel_mir1136	31	miRNA	NC_000071.6:+:117641326_117641399	1.24
novel_mir1149	10	miRNA	NC_000079.6:-:113226891_113226940	0.4
novel_mir1150	107	miRNA	NC_000079.6:-:73470659_73470735	4.29
novel_mir1160	15	miRNA	NC_000069.6:+:107159414_107159476	0.6
novel_mir1170	27	miRNA	NC_000068.7:+:3202598_3202669	1.08
novel_mir1176	444	miRNA	NC_000073.6:+:79744777_79744843	17.8
novel_mir858	47	miRNA	NC_000070.6:+:100095844_100095929	1.88
novel_mir1178	143	miRNA	NC_000079.6:-:113691771_113691845	5.73
novel_mir1186	38	miRNA	NC_000079.6:-:64184658_64184717	1.52
novel_mir1204	22	miRNA	NC_000067.6:+:41072009_41072084	0.88
novel_mir1211	307	miRNA	NC_000076.6:-:43412389_43412491	12.31
novel_mir1242	32	miRNA	NC_000072.6:+:93410002_93410054	1.28
novel_mir1246	36	miRNA	NC_000078.6:+:87098435_87098502	1.44
novel_mir1282	78	miRNA	NC_000084.6:-:5602308_5602382	3.13
novel_mir1304	17	miRNA	NC_000068.7:-:154806275_154806353	0.68
novel_mir1311	17	miRNA	NC_000073.6:-:30699751_30699787	0.68
novel_mir1318	12	miRNA	NC_000071.6:-:74861491_74861559	0.48
novel_mir1348	13	miRNA	NC_000076.6:-:41578194_41578252	0.52
novel_mir1352	79	miRNA	NC_000072.6:+:147604643_147604718	3.17
novel_mir1377	47	miRNA	NC_000077.6:-:69226435_69226499	1.88
novel_mir1380	10	miRNA	NC_000070.6:+:127984683_127984746	0.4
novel_mir1381	12	miRNA	NC_000086.7:+:102805139_102805203	0.48
novel_mir1415	10	miRNA	NC_000068.7:+:141231099_141231186	0.4
novel_mir1431	295	miRNA	NC_000084.6:+:62347452_62347512	11.83
novel_mir1443	10	miRNA	NC_000083.6:+:45772919_45772993	0.4
novel_mir1489	13	miRNA	NC_000079.6:+:13687635_13687725	0.52
novel_mir448	13	miRNA	NC_000070.6:+:151956541_151956624	0.52
novel_mir1500	10	miRNA	NC_000077.6:+:85923572_85923654	0.4
novel_mir1502	296	miRNA	NC_000068.7:-:3748926_3748993	11.87
novel_mir1516	16	miRNA	NC_000078.6:+:65421010_65421080	0.64
novel_mir1531	35	miRNA	NC_000072.6:-:63079480_63079574	1.4
novel_mir1535	196	miRNA	NC_000071.6:+:39248474_39248514	7.86
novel_mir1544	10	miRNA	NC_000080.6:-:24975547_24975616	0.4
novel_mir1549	15	miRNA	NC_000083.6:-:4507530_4507589	0.6
novel_mir1575	173	miRNA	NC_000079.6:-:56221062_56221119	6.94
novel_mir1577	48	miRNA	NC_000073.6:-:40525701_40525766	1.92
novel_mir1589	11	miRNA	NC_000069.6:+:95384184_95384270	0.44
novel_mir1596	10	miRNA	NC_000077.6:+:78845717_78845812	0.4
novel_mir1597	65	miRNA	NC_000073.6:+:113795332_113795404	2.61
novel_mir1537	114	miRNA	NC_000074.6:-:104412846_104412915	4.57
novel_mir1667	13	miRNA	NC_000069.6:-:149107186_149107254	0.52
novel_mir1670	443	miRNA	NC_000077.6:+:80199178_80199233	17.76
novel_mir1673	11	miRNA	NC_000081.6:+:101251369_101251446	0.44
novel_mir1685	15	miRNA	NC_000079.6:-:95861396_95861446	0.6
novel_mir1711	23	miRNA	NC_000072.6:+:125875940_125875989	0.92
novel_mir1714	18	miRNA	NC_000070.6:-:108330946_108331005	0.72
novel_mir1730	51	miRNA	NC_000081.6:-:83817532_83817591	2.04
novel_mir1762	20	miRNA	NC_000086.7:+:96092486_96092561	0.8
novel_mir1640	16	miRNA	NC_000079.6:-:56115380_56115429	0.64
novel_mir1792	120	miRNA	NC_000068.7:+:160479522_160479574	4.81
novel_mir1798	51	miRNA	NC_000086.7:+:69994653_69994706	2.04
novel_mir1813	332	miRNA	NC_000076.6:-:62349673_62349723	13.31
novel_mir1853	16	miRNA	NC_000079.6:-:41020102_41020183	0.64
novel_mir1863	32	miRNA	NC_000084.6:+:12769863_12769950	1.28
novel_mir1909	10	miRNA	NC_000085.6:+:30832107_30832180	0.4
novel_mir1920	40	miRNA	NC_000077.6:-:113662198_113662258	1.6
novel_mir1946	41	miRNA	NC_000072.6:+:81868897_81868960	1.64
novel_mir1956	12	miRNA	NC_000068.7:-:32922850_32922933	0.48
novel_mir1959	24	miRNA	NC_000072.6:-:127754070_127754152	0.96
novel_mir1971	123	miRNA	NC_000071.6:+:99512682_99512765	4.93
novel_mir1986	71	miRNA	NC_000070.6:+:155905462_155905531	2.85
novel_mir2003	11	miRNA	NC_000075.6:+:113644044_113644117	0.44
novel_mir2036	17	miRNA	NC_000080.6:-:114460724_114460799	0.68
novel_mir2060	37	miRNA	NC_000081.6:-:76408632_76408714	1.48
novel_mir2065	52	miRNA	NC_000083.6:+:12675861_12675908	2.09
novel_mir2079	1495	miRNA	NC_000072.6:+:89094370_89094444	59.95
novel_mir2090	10	miRNA	NC_000085.6:-:25241298_25241360	0.4
novel_mir2123	10	miRNA	NC_000082.6:+:90507758_90507814	0.4
novel_mir2132	644	miRNA	NC_000075.6:-:74856116_74856160	25.82
novel_mir2150	17	miRNA	NC_000072.6:+:30158201_30158278	0.68
novel_mir2215	420	miRNA	NC_000074.6:-:84768832_84768894	16.84
novel_mir2299	13	miRNA	NC_000077.6:-:60176349_60176385	0.52
novel_mir2321	16	miRNA	NC_000067.6:-:167673402_167673473	0.64
novel_mir2379	87	miRNA	NC_000069.6:+:127021225_127021312	3.49
novel_mir2383	31	miRNA	NC_000072.6:+:128364525_128364596	1.24
novel_mir2409	24	miRNA	NC_000080.6:+:21025294_21025382	0.96
novel_mir2101	32	miRNA	NC_000070.6:+:141778678_141778753	1.28
novel_mir2414	38	miRNA	NC_000071.6:-:147008706_147008775	1.52
novel_mir2465	14	miRNA	NC_000076.6:-:68280181_68280262	0.56
novel_mir2476	10	miRNA	NC_000070.6:+:137527061_137527148	0.4
novel_mir2489	346	miRNA	NC_000070.6:-:57566617_57566676	13.87
novel_mir2490	29	miRNA	NC_000079.6:+:109806289_109806366	1.16
novel_mir2519	15	miRNA	NC_000071.6:+:134531355_134531438	0.6
novel_mir2521	32	miRNA	NC_000068.7:-:90489271_90489350	1.28
novel_mir2535	180	miRNA	NC_000085.6:+:37656771_37656816	7.22
novel_mir2556	48	miRNA	NC_000074.6:-:53964497_53964539	1.92
novel_mir2597	20	miRNA	NC_000075.6:-:12205861_12205966	0.8
novel_mir2601	10	miRNA	NC_000068.7:+:80339610_80339691	0.4
novel_mir606	176	miRNA	NC_000084.6:+:39822048_39822134	7.06
novel_mir2618	191	miRNA	NC_000073.6:-:40412680_40412727	7.66
novel_mir2646	11	miRNA	NC_000075.6:-:51262720_51262766	0.44
novel_mir2648	33	miRNA	NC_000068.7:+:107539719_107539797	1.32
novel_mir2671	20	miRNA	NC_000068.7:+:74712719_74712763	0.8
novel_mir764	53	miRNA	NC_000072.6:+:115346224_115346315	2.13
novel_mir2743	39	miRNA	NC_000070.6:-:147897790_147897839	1.56
novel_mir2764	41	miRNA	NC_000074.6:-:45524752_45524823	1.64
novel_mir2779	10	miRNA	NC_000084.6:+:89170731_89170791	0.4
novel_mir2826	73	miRNA	NC_000068.7:-:14434562_14434626	2.93
novel_mir2881	11	miRNA	NC_000073.6:+:98685880_98685951	0.44
novel_mir2323	87	miRNA	NC_000067.6:+:34486407_34486458	3.49
novel_mir2887	46	miRNA	NC_000082.6:+:23309161_23309219	1.84
novel_mir2935	196	miRNA	NC_000069.6:+:147178099_147178167	7.86
novel_mir2958	11	miRNA	NC_000078.6:+:111993427_111993480	0.44
novel_mir2972	11	miRNA	NC_000083.6:+:26686187_26686270	0.44
novel_mir2984	20	miRNA	NC_000085.6:+:45325540_45325599	0.8
novel_mir2991	63	miRNA	NC_000077.6:+:113349672_113349751	2.53
novel_mir2999	111	miRNA	NC_000077.6:-:45567919_45568006	4.45
novel_mir3000	24	miRNA	NC_000071.6:+:134749535_134749589	0.96
novel_mir3044	15	miRNA	NC_000070.6:-:135959641_135959719	0.6
novel_mir3065	152	miRNA	NC_000072.6:+:31005014_31005051	6.09
novel_mir3088	168	miRNA	NC_000078.6:+:55962344_55962396	6.74
novel_mir3136	43	miRNA	NC_000070.6:+:40769473_40769523	1.72
novel_mir3139	109	miRNA	NC_000074.6:+:45854756_45854800	4.37
novel_mir3154	12	miRNA	NC_000068.7:-:77897310_77897385	0.48
novel_mir3185	112	miRNA	NC_000069.6:-:138148407_138148496	4.49
novel_mir3193	8388	miRNA	NC_000083.6:+:78814163_78814214	336.34
novel_mir1916	19	miRNA	NC_000081.6:+:12431943_12432021	0.76
novel_mir3229	211	miRNA	NC_000081.6:+:72074438_72074488	8.46
novel_mir3233	10	miRNA	NC_000085.6:-:55750394_55750466	0.4
novel_mir3247	148	miRNA	NC_000071.6:+:22036750_22036797	5.93
novel_mir3250	89	miRNA	NC_000079.6:-:37447676_37447757	3.57
novel_mir3251	53	miRNA	NC_000069.6:+:32266594_32266682	2.13
novel_mir3254	194	miRNA	NC_000082.6:+:76236471_76236538	7.78
novel_mir3309	47	miRNA	NC_000068.7:-:174330027_174330087	1.88
novel_mir3291	639	miRNA	NC_000076.6:+:108968899_108968938	25.62
novel_mir3315	110	miRNA	NC_000081.6:-:93336478_93336541	4.41
novel_mir2753	94	miRNA	NC_000069.6:-:134621011_134621078	3.77
novel_mir3348	10	miRNA	NC_000074.6:+:121950789_121950849	0.4
novel_mir3360	55	miRNA	NC_000068.7:-:44926947_44927020	2.21
novel_mir3375	634	miRNA	NC_000067.6:+:167340412_167340468	25.42
novel_mir3375	8952	miRNA	NC_000082.6:-:11144080_11144136	358.95
novel_mir3379	1673	miRNA	NC_000067.6:-:167340422_167340480	67.08
novel_mir3384	19	miRNA	NC_000077.6:+:74724446_74724488	0.76
novel_mir3386	90	miRNA	NC_000076.6:-:54010399_54010480	3.61
novel_mir3395	117	miRNA	NC_000084.6:+:77065515_77065578	4.69
novel_mir3399	11	miRNA	NC_000067.6:-:29222397_29222443	0.44
novel_mir3406	29	miRNA	NC_000069.6:+:88950612_88950688	1.16
novel_mir3410	14	miRNA	NC_000075.6:+:106453836_106453898	0.56
novel_mir3413	11	miRNA	NC_000085.6:-:24030955_24031023	0.44
novel_mir3415	25	miRNA	NC_000079.6:-:44444342_44444400	1
novel_mir3436	273	miRNA	NC_000078.6:+:4082598_4082673	10.95
novel_mir3438	130	miRNA	NC_000081.6:+:68362725_68362784	5.21
novel_mir2361	11	miRNA	NC_000078.6:-:5572281_5572347	0.44
novel_mir3468	11	miRNA	NC_000070.6:+:146263382_146263430	0.44
novel_mir3469	67	miRNA	NC_000073.6:-:45793744_45793818	2.69
novel_mir3476	104	miRNA	NC_000070.6:-:151861265_151861308	4.17
novel_mir3477	21	miRNA	NC_000082.6:-:18288924_18288997	0.84
novel_mir3479	34	miRNA	NC_000083.6:+:39844930_39845006	1.36
novel_mir3480	130	miRNA	NC_000077.6:-:23307176_23307229	5.21
novel_mir3468	36	miRNA	NT_166299.2:+:175297_175347	1.44
novel_mir3492	23	miRNA	NC_000083.6:+:12991963_12992024	0.92
novel_mir3494	61	miRNA	NC_000075.6:+:62344412_62344463	2.45
novel_mir3496	32	miRNA	NC_000070.6:+:119195355_119195418	1.28
novel_mir3498	719	miRNA	NC_000073.6:-:109865616_109865693	28.83
novel_mir3502	64	miRNA	NC_000071.6:+:29569393_29569469	2.57
novel_mir3511	17	miRNA	NC_000067.6:+:43445848_43445891	0.68
novel_mir3522	55	miRNA	NC_000077.6:-:120237082_120237141	2.21
novel_mir3529	39	miRNA	NC_000073.6:+:142659401_142659477	1.56
novel_mir3532	173	miRNA	NC_000068.7:-:24460903_24460976	6.94
novel_mir3537	36	miRNA	NC_000083.6:-:4994109_4994166	1.44
novel_mir3540	44	miRNA	NC_000072.6:-:23839349_23839407	1.76
novel_mir3543	199	miRNA	NC_000069.6:-:126597244_126597304	7.98
novel_mir3544	19	miRNA	NC_000067.6:-:180725825_180725879	0.76
novel_mir3545	119	miRNA	NC_000067.6:+:36068469_36068525	4.77
novel_mir3553	144	miRNA	NC_000079.6:-:45965204_45965262	5.77
novel_mir3557	193	miRNA	NC_000068.7:-:165234414_165234461	7.74
novel_mir3562	10	miRNA	NC_000070.6:-:108833292_108833350	0.4
novel_mir2997	19	miRNA	NC_000073.6:-:19294856_19294906	0.76
novel_mir3565	31	miRNA	NC_000080.6:-:115042062_115042144	1.24
novel_mir3579	138	miRNA	NC_000073.6:+:4776939_4777004	5.53
novel_mir3589	259	miRNA	NC_000075.6:+:108306522_108306605	10.39
novel_mir3590	232	miRNA	NC_000073.6:-:137321603_137321644	9.3
novel_mir3597	2283	miRNA	NC_000069.6:-:95930051_95930113	91.54
novel_mir3601	17	miRNA	NC_000070.6:+:78211818_78211888	0.68
novel_mir3602	15	miRNA	NC_000074.6:-:86382294_86382335	0.6
novel_mir3607	1637	miRNA	NC_000070.6:+:46344223_46344289	65.64
novel_mir3609	334	miRNA	NC_000083.6:-:12992092_12992147	13.39
novel_mir3547	33	miRNA	NC_000072.6:-:87811600_87811678	1.32
novel_mir3621	16	miRNA	NC_000077.6:-:100473070_100473150	0.64
novel_mir3623	25	miRNA	NC_000067.6:-:76081419_76081506	1
novel_mir3626	77	miRNA	NC_000081.6:-:96698820_96698883	3.09
novel_mir3628	115	miRNA	NC_000073.6:-:105764731_105764767	4.61
novel_mir3630	2065	miRNA	NC_000077.6:+:119055947_119056013	82.8
novel_mir3640	37	miRNA	NC_000078.6:-:71016520_71016577	1.48
novel_mir3641	195	miRNA	NC_000073.6:-:16615216_16615306	7.82
novel_mir3651	11	miRNA	NC_000085.6:-:5840775_5840843	0.44
novel_mir3652	76	miRNA	NC_000083.6:-:35126332_35126404	3.05
novel_mir3659	178	miRNA	NC_000082.6:-:96127510_96127576	7.14
novel_mir3660	29	miRNA	NC_000069.6:+:20154977_20155018	1.16
novel_mir3666	77	miRNA	NC_000073.6:+:126081918_126081986	3.09
novel_mir3670	20	miRNA	NC_000078.6:+:101028870_101028938	0.8
novel_mir3672	16	miRNA	NC_000078.6:+:116281552_116281622	0.64
novel_mir3674	52	miRNA	NC_000084.6:-:67724102_67724174	2.09
novel_mir3677	71	miRNA	NC_000077.6:+:82781400_82781445	2.85
novel_mir3678	11	miRNA	NC_000070.6:+:16013796_16013857	0.44
novel_mir3679	592	miRNA	NC_000067.6:-:64121924_64121976	23.74
novel_mir3686	11	miRNA	NC_000070.6:-:129137452_129137521	0.44
novel_mir3688	36	miRNA	NC_000085.6:-:34527241_34527312	1.44
novel_mir3692	235	miRNA	NC_000073.6:-:30823720_30823777	9.42
novel_mir3693	12	miRNA	NC_000086.7:-:101274202_101274276	0.48
novel_mir3697	14	miRNA	NC_000085.6:+:43753066_43753107	0.56
novel_mir3699	282	miRNA	NC_000073.6:+:127708698_127708754	11.31
novel_mir3703	10	miRNA	NC_000076.6:-:54075678_54075729	0.4
novel_mir3704	106	miRNA	NC_000071.6:-:52190476_52190522	4.25
novel_mir3524	3814	miRNA	NC_000068.7:-:162661135_162661205	152.93
novel_mir3598	13	miRNA	NC_000072.6:-:30304196_30304246	0.52
novel_mir3724	89	miRNA	NC_000070.6:+:152273989_152274034	3.57
novel_mir3737	29	miRNA	NC_000073.6:-:105481805_105481885	1.16
novel_mir3738	13	miRNA	NC_000071.6:+:23434266_23434324	0.52
novel_mir3749	41	miRNA	NC_000070.6:+:120287330_120287392	1.64
novel_mir3751	425	miRNA	NC_000069.6:-:69696104_69696143	17.04
novel_mir3769	12	miRNA	NC_000077.6:-:97744935_97744995	0.48
novel_mir3770	26	miRNA	NC_000086.7:-:150366929_150367001	1.04
novel_mir3771	697	miRNA	NC_000068.7:-:35582012_35582096	27.95
novel_mir3774	2892	miRNA	NC_000082.6:+:91729459_91729536	115.96
novel_mir3779	98	miRNA	NC_000086.7:+:13072747_13072799	3.93
novel_mir3784	13	miRNA	NC_000076.6:+:80656481_80656552	0.52
novel_mir3795	37	miRNA	NC_000083.6:-:27113761_27113840	1.48
novel_mir3797	41	miRNA	NC_000084.6:-:37969762_37969808	1.64
novel_mir3565	10	miRNA	NC_000080.6:-:115042126_115042204	0.4
novel_mir3805	11	miRNA	NC_000070.6:+:132510174_132510227	0.44
novel_mir3477	74	miRNA	NC_000082.6:-:18288903_18288947	2.97
novel_mir3828	14	miRNA	NC_000082.6:+:49855706_49855773	0.56
novel_mir3832	14	miRNA	NC_000085.6:-:41482529_41482582	0.56
novel_mir3840	104	miRNA	NC_000074.6:+:109737295_109737372	4.17
novel_mir3844	12	miRNA	NC_000071.6:-:98185890_98185969	0.48
novel_mir3845	126	miRNA	NC_000073.6:+:16313992_16314068	5.05
novel_mir3847	28	miRNA	NC_000077.6:+:107547816_107547871	1.12
novel_mir3848	20	miRNA	NC_000070.6:+:134768028_134768071	0.8
novel_mir3850	253	miRNA	NC_000071.6:+:107289563_107289603	10.14
novel_mir3854	287	miRNA	NC_000071.6:-:35228973_35229045	11.51
novel_mir3857	54	miRNA	NC_000084.6:-:40219303_40219359	2.17
novel_mir3858	17	miRNA	NC_000067.6:+:87791981_87792046	0.68
novel_mir3863	21	miRNA	NC_000068.7:-:32259939_32260022	0.84
novel_mir3521	10	miRNA	NC_000067.6:+:37551560_37551604	0.4
novel_mir3706	3227	miRNA	NC_000074.6:-:116733250_116733319	129.39
novel_mir3869	154	miRNA	NC_000068.7:-:60962377_60962421	6.17
novel_mir3873	89	miRNA	NC_000086.7:-:103165264_103165313	3.57
novel_mir3880	17	miRNA	NC_000071.6:-:136757538_136757610	0.68
novel_mir3898	10	miRNA	NC_000074.6:-:121294802_121294877	0.4
novel_mir3903	12	miRNA	NC_000076.6:+:80577088_80577157	0.48
novel_mir3914	73	miRNA	NC_000079.6:-:98926217_98926303	2.93
novel_mir3915	16	miRNA	NC_000067.6:+:93190967_93191030	0.64
novel_mir3919	23	miRNA	NC_000081.6:+:80929240_80929294	0.92
novel_mir3926	12	miRNA	NC_000075.6:-:21290857_21290920	0.48
novel_mir3927	12	miRNA	NC_000084.6:-:24020684_24020745	0.48
novel_mir3929	17	miRNA	NC_000076.6:+:80142328_80142383	0.68
novel_mir3936	45	miRNA	NC_000078.6:+:70825459_70825542	1.8
novel_mir3948	37	miRNA	NC_000078.6:-:3834108_3834176	1.48
novel_mir3962	80	miRNA	NC_000067.6:-:167688640_167688711	3.21
novel_mir3979	25	miRNA	NC_000076.6:-:117845846_117845920	1
novel_mir3985	1375	miRNA	NC_000067.6:+:52232367_52232451	55.13
novel_mir3986	51	miRNA	NC_000075.6:-:114476777_114476843	2.04
novel_mir3989	16	miRNA	NC_000075.6:+:39439181_39439257	0.64
novel_mir4009	84	miRNA	NC_000072.6:-:30304358_30304410	3.37
novel_mir4019	10	miRNA	NC_000083.6:+:24850586_24850649	0.4
novel_mir4033	3112	miRNA	NC_000082.6:+:31898542_31898633	124.78
novel_mir4034	44	miRNA	NC_000071.6:-:34549871_34549925	1.76
novel_mir4044	38	miRNA	NC_000073.6:+:143460100_143460172	1.52
novel_mir4055	20	miRNA	NC_000086.7:-:58038710_58038795	0.8
novel_mir4067	74	miRNA	NC_000070.6:-:82505528_82505568	2.97
novel_mir4068	14	miRNA	NC_000076.6:-:52027930_52028010	0.56
novel_mir4009	29	miRNA	NC_000073.6:+:39588608_39588676	1.16
novel_mir4093	32	miRNA	NC_000068.7:-:174438901_174438967	1.28
novel_mir4105	56	miRNA	NC_000077.6:+:5521014_5521077	2.25
novel_mir4136	465	miRNA	NC_000081.6:+:25622556_25622638	18.65
novel_mir4139	801	miRNA	NC_000069.6:-:153664048_153664140	32.12
novel_mir4140	23	miRNA	NC_000069.6:+:102685418_102685488	0.92
novel_mir4143	39	miRNA	NC_000071.6:+:35039099_35039179	1.56
novel_mir4149	25	miRNA	NC_000079.6:-:63240013_63240056	1
novel_mir4150	21	miRNA	NC_000070.6:+:128550290_128550353	0.84
novel_mir3544	58	miRNA	NC_000067.6:-:180725796_180725848	2.33
novel_mir4164	31	miRNA	NC_000077.6:+:78261796_78261884	1.24
novel_mir4165	18	miRNA	NC_000086.7:-:37571582_37571637	0.72
novel_mir4186	348	miRNA	NC_000073.6:-:141276639_141276692	13.95
novel_mir4190	39	miRNA	NT_187005.1:-:1460326_1460363	1.56
novel_mir4193	354	miRNA	NC_000085.6:+:46056665_46056719	14.19
novel_mir4236	23	miRNA	NC_000085.6:-:47143598_47143683	0.92
novel_mir4242	11	miRNA	NC_000078.6:+:111790077_111790155	0.44
novel_mir4257	18	miRNA	NC_000072.6:+:91772714_91772780	0.72
novel_mir4264	21	miRNA	NC_000085.6:+:47855080_47855149	0.84
novel_mir4265	55	miRNA	NC_000075.6:-:123113143_123113191	2.21
novel_mir4269	612	miRNA	NC_000075.6:+:58284342_58284412	24.54
novel_mir4272	128	miRNA	NC_000077.6:+:116843061_116843117	5.13
novel_mir3607	674	miRNA	NC_000070.6:+:46344271_46344312	27.03
novel_mir4325	40	miRNA	NC_000070.6:-:126411832_126411893	1.6
novel_mir4358	35	miRNA	NC_000083.6:+:49271059_49271138	1.4
novel_mir4387	14	miRNA	NC_000076.6:-:39649223_39649305	0.56
novel_mir4389	28	miRNA	NC_000068.7:+:163204383_163204451	1.12
novel_mir4402	40	miRNA	NC_000068.7:+:91183273_91183329	1.6
novel_mir4407	21	miRNA	NC_000077.6:-:98683040_98683118	0.84
novel_mir4409	1147	miRNA	NC_000084.6:+:69425789_69425834	45.99
novel_mir4417	10	miRNA	NC_000073.6:-:127273985_127274032	0.4
novel_mir4430	11	miRNA	NC_000069.6:+:87930427_87930477	0.44
novel_mir4431	95	miRNA	NC_000071.6:+:123037325_123037382	3.81
novel_mir4463	711	miRNA	NC_000068.7:+:178608670_178608754	28.51
novel_mir4464	44	miRNA	NT_187001.1:+:75454_75500	1.76
novel_mir4468	1039	miRNA	NC_000067.6:-:36055236_36055323	41.66
novel_mir4475	15	miRNA	NC_000073.6:+:127490879_127490962	0.6
novel_mir3808	10	miRNA	NC_000085.6:-:46500851_46500893	0.4
novel_mir4487	10	miRNA	NC_000067.6:+:119483591_119483656	0.4
novel_mir4500	30	miRNA	NC_000074.6:-:123256553_123256601	1.2
novel_mir4509	82	miRNA	NC_000070.6:+:125761834_125761896	3.29
novel_mir4510	13	miRNA	NC_000071.6:+:125441269_125441328	0.52
novel_mir4515	192	miRNA	NC_000079.6:+:93772186_93772251	7.7
novel_mir4533	400	miRNA	NC_000071.6:-:118078776_118078839	16.04
novel_mir4540	13	miRNA	NC_000069.6:+:144362628_144362690	0.52
novel_mir4542	12301	miRNA	NC_000077.6:+:62519123_62519169	493.24
novel_mir4572	18	miRNA	NC_000085.6:-:7139432_7139521	0.72
novel_mir4574	17	miRNA	NC_000081.6:+:84949078_84949137	0.68
novel_mir4579	25	miRNA	NC_000072.6:-:90836316_90836403	1
novel_mir4607	79	miRNA	NC_000077.6:-:102199258_102199346	3.17
novel_mir4626	40	miRNA	NC_000071.6:-:128359757_128359813	1.6
novel_mir4638	12	miRNA	NC_000076.6:-:7867676_7867738	0.48
novel_mir4652	10	miRNA	NC_000068.7:-:118110660_118110716	0.4
novel_mir4658	251	miRNA	NC_000079.6:+:72120743_72120812	10.06
novel_mir4668	218	miRNA	NC_000073.6:+:137258859_137258918	8.74
novel_mir3551	231	miRNA	NC_000083.6:-:12318671_12318755	9.26
novel_mir4719	16	miRNA	NC_000084.6:+:88972119_88972177	0.64
novel_mir4746	29	miRNA	NC_000070.6:+:139442771_139442859	1.16
novel_mir4757	30	miRNA	NC_000083.6:-:25964095_25964164	1.2
novel_mir4809	22	miRNA	NC_000077.6:+:113174686_113174748	0.88
novel_mir4874	1671	miRNA	NC_000071.6:+:137485910_137485996	67
novel_mir4889	12	miRNA	NC_000081.6:-:84602608_84602651	0.48
novel_mir4451	17	miRNA	NC_000069.6:+:28196038_28196087	0.68
novel_mir4925	17	miRNA	NC_000076.6:-:80151471_80151528	0.68
novel_mir4926	20	miRNA	NC_000067.6:+:125509225_125509306	0.8
novel_mir4935	18	miRNA	NT_187025.1:-:37062_37139	0.72
novel_mir4964	11	miRNA	NC_000077.6:+:54027678_54027726	0.44
novel_mir4978	10	miRNA	NC_000069.6:-:29851108_29851183	0.4
novel_mir4990	51	miRNA	NT_187004.1:-:1553633_1553697	2.04
novel_mir4995	22	miRNA	NC_000083.6:-:31746637_31746704	0.88
novel_mir5012	14	miRNA	NC_000071.6:+:110176538_110176597	0.56
novel_mir5107	23	miRNA	NC_000077.6:+:100626079_100626151	0.92
novel_mir5166	32	miRNA	NC_000068.7:-:180660414_180660485	1.28
novel_mir5173	60	miRNA	NC_000069.6:-:153563703_153563769	2.41
novel_mir5183	23	miRNA	NC_000069.6:-:19040461_19040542	0.92
novel_mir5220	11	miRNA	NC_000071.6:+:23936588_23936637	0.44
novel_mir5226	34	miRNA	NC_000068.7:-:116067274_116067345	1.36
novel_mir5233	25	miRNA	NC_000083.6:+:26114911_26114982	1
novel_mir5247	13	miRNA	NC_000068.7:-:180013828_180013905	0.52
novel_mir5251	25	miRNA	NC_000086.7:+:36804325_36804391	1
novel_mir5254	11	miRNA	NC_000077.6:-:104190816_104190867	0.44
novel_mir5257	82	miRNA	NC_000070.6:+:156217299_156217370	3.29
novel_mir5262	72	miRNA	NC_000068.7:-:163371084_163371159	2.89
novel_mir5269	74	miRNA	NC_000068.7:+:179497459_179497532	2.97
novel_mir5318	23	miRNA	NC_000079.6:+:51526663_51526733	0.92
novel_mir5362	10	miRNA	NC_000081.6:-:58434731_58434806	0.4
novel_mir5389	16	miRNA	NT_109318.2:+:139158_139240	0.64
novel_mir5390	32	miRNA	NC_000078.6:+:83061611_83061679	1.28
novel_mir5436	10	miRNA	NC_000068.7:-:163480528_163480566	0.4
novel_mir5466	100	miRNA	NC_000081.6:-:38078598_38078675	4.01
novel_mir5499	10	miRNA	NC_000071.6:-:115173312_115173358	0.4
novel_mir5503	25	miRNA	NC_000077.6:-:75444354_75444436	1
novel_mir5519	1871	miRNA	NC_000081.6:-:64156765_64156829	75.02
novel_mir5531	13	miRNA	NC_000083.6:+:23699447_23699498	0.52
novel_mir5538	260	miRNA	NC_000071.6:+:33018832_33018916	10.43
novel_mir5542	440	miRNA	NC_000071.6:-:146955354_146955430	17.64
novel_mir5561	1846	miRNA	NC_000069.6:-:96268694_96268751	74.02
novel_mir5565	31	miRNA	NC_000075.6:-:64533650_64533724	1.24
novel_mir5586	31	miRNA	NC_000077.6:-:86757482_86757543	1.24
novel_mir5596	12	miRNA	NC_000071.6:-:124162063_124162144	0.48
novel_mir5620	10	miRNA	NC_000077.6:-:68648491_68648568	0.4
novel_mir5702	90	miRNA	NC_000073.6:+:19352317_19352389	3.61
novel_mir4383	27	miRNA	NC_000083.6:-:51831935_51831986	1.08
novel_mir5745	31	miRNA	NC_000075.6:-:43173581_43173641	1.24
novel_mir5754	67	miRNA	NC_000081.6:-:75722721_75722785	2.69
novel_mir5762	252	miRNA	NC_000077.6:-:116116754_116116841	10.1
novel_mir5775	13	miRNA	NC_000070.6:-:131791956_131792004	0.52
novel_mir5781	15	miRNA	NC_000068.7:+:156020779_156020837	0.6
novel_mir5795	12	miRNA	NC_000075.6:+:66255505_66255576	0.48
novel_mir5799	1203	miRNA	NC_000077.6:-:69063548_69063586	48.24
novel_mir5803	4812	miRNA	NC_000068.7:-:92123589_92123671	192.95
novel_mir5807	806	miRNA	NC_000078.6:+:73085117_73085203	32.32
novel_mir5829	19	miRNA	NC_000084.6:+:75916679_75916742	0.76
novel_mir5614	9585	miRNA	NC_000081.6:+:89370419_89370460	384.33
novel_mir5850	2285	miRNA	NC_000071.6:+:114009819_114009864	91.62
novel_mir5875	42	miRNA	NC_000077.6:-:5520832_5520914	1.68
novel_mir5888	5772	miRNA	NC_000068.7:-:132053175_132053221	231.44
novel_mir5889	170	miRNA	NC_000077.6:-:102433217_102433293	6.82
novel_mir5924	35	miRNA	NC_000071.6:-:142348060_142348119	1.4
novel_mir5927	544	miRNA	NC_000086.7:-:48450088_48450147	21.81
novel_mir5928	43	miRNA	NC_000081.6:+:76351326_76351405	1.72
novel_mir5931	93	miRNA	NC_000068.7:-:166578126_166578219	3.73
novel_mir5947	12	miRNA	NC_000086.7:+:134489107_134489174	0.48
novel_mir5952	11	miRNA	NC_000073.6:+:45145966_45146041	0.44
novel_mir5992	17	miRNA	NC_000076.6:+:81136795_81136853	0.68
novel_mir6008	603	miRNA	NC_000080.6:+:55526880_55526936	24.18
novel_mir6059	31	miRNA	NC_000072.6:+:88311986_88312075	1.24
novel_mir6067	14	miRNA	NC_000068.7:-:135658782_135658843	0.56
novel_mir6077	708	miRNA	NC_000077.6:-:118361939_118361981	28.39
novel_mir6098	22	miRNA	NC_000067.6:-:75487185_75487254	0.88
novel_mir6102	11	miRNA	NC_000071.6:+:138756523_138756580	0.44
novel_mir3819	11	miRNA	NC_000073.6:+:6156234_6156283	0.44
novel_mir6133	26	miRNA	NC_000076.6:-:81144491_81144552	1.04
