# Supplementary material for: MicroRNAs Involved in the Therapeutic Functions of Noni (Morinda citrifolia L.) Fruit Juice in the Treatment of Acute Gouty Arthritis in Mice Induced with Monosodium Urate
Source: Foods. 2021 Jul 15;10(7):1638. doi: 10.3390/foods10071638 (PMC8308103; doi:10.3390/foods10071638)
Supplement: Supplementary file 1 [file foods-10-01638-s001.zip › Table S3.xls]

## Sheet: normal control vs model groups
miRNA id	Count(JK5)	Count(JM5)	TPM(JK5)	TPM(JM5)	log2 Ratio(JM5/JK5)	Up-Down-Regulation(JM5/JK5)	P-value	FDR
novel_mir4217	0	2488	0.001	143.48	17.1305	Up	0	0
novel_mir4473	0	1779	0.001	102.6	16.6467	Up	0	0
novel_mir1046	0	1580	0.001	91.12	16.4755	Up	0	0
novel_mir3231	0	1412	0.001	81.43	16.3133	Up	0	0
novel_mir3336	0	1319	0.001	76.07	16.215	Up	0	0
novel_mir5386	0	1115	0.001	64.3	15.9725	Up	0	0
novel_mir558	0	1026	0.001	59.17	15.8526	Up	0	0
novel_mir3076	0	983	0.001	56.69	15.7908	Up	0	0
novel_mir4685	0	814	0.001	46.94	15.5185	Up	0	0
novel_mir299	0	746	0.001	43.02	15.3927	Up	1.70178e-286	3.94267e-285
novel_mir2355	0	725	0.001	41.81	15.3516	Up	1.87515e-278	4.25124e-277
novel_mir1538	0	650	0.001	37.49	15.1942	Up	9.8841e-250	2.10551e-248
novel_mir2498	0	616	0.001	35.52	15.1163	Up	1.03641e-236	2.15004e-235
novel_mir4257	0	608	0.001	35.06	15.0975	Up	1.20005e-233	2.4574e-232
novel_mir4994	0	605	0.001	34.89	15.0905	Up	1.69074e-232	3.39646e-231
novel_mir1345	0	583	0.001	33.62	15.037	Up	4.49954e-224	8.76168e-223
novel_mir5558	0	575	0.001	33.16	15.0172	Up	5.20998e-221	9.96173e-220
novel_mir5123	0	545	0.001	31.43	14.9399	Up	1.60545e-209	3.01521e-208
novel_mir4718	0	517	0.001	29.82	14.864	Up	8.48086e-199	1.56501e-197
novel_mir5579	0	470	0.001	27.11	14.7265	Up	8.46246e-181	1.45188e-179
novel_mir4083	0	470	0.001	27.11	14.7265	Up	8.46246e-181	1.44408e-179
novel_mir3326	0	427	0.001	24.63	14.5881	Up	2.48154e-164	3.91861e-163
novel_mir4188	0	421	0.001	24.28	14.5675	Up	4.92574e-162	7.58947e-161
novel_mir4300	0	407	0.001	23.47	14.5185	Up	1.13212e-156	1.70301e-155
novel_mir689	0	406	0.001	23.41	14.5148	Up	2.73434e-156	4.09377e-155
novel_mir3446	0	400	0.001	23.07	14.4937	Up	5.42756e-154	7.9755e-153
novel_mir664	0	393	0.001	22.66	14.4679	Up	2.60204e-151	3.73705e-150
novel_mir1045	0	389	0.001	22.43	14.4531	Up	8.8542e-150	1.26023e-148
novel_mir3235	0	367	0.001	21.17	14.3697	Up	2.35636e-141	3.22374e-140
novel_mir1165	0	366	0.001	21.11	14.3656	Up	5.69114e-141	7.75265e-140
novel_mir1573	0	361	0.001	20.82	14.3457	Up	4.67726e-139	6.29052e-138
novel_mir3587	0	359	0.001	20.7	14.3373	Up	2.7284e-138	3.65398e-137
novel_mir2584	0	348	0.001	20.07	14.2928	Up	4.45096e-134	5.88639e-133
novel_mir1607	0	346	0.001	19.95	14.2841	Up	2.5964e-133	3.40536e-132
novel_mir470	0	341	0.001	19.67	14.2637	Up	2.13386e-131	2.77577e-130
novel_mir774	0	334	0.001	19.26	14.2333	Up	1.023e-128	1.31992e-127
novel_mir2679	0	330	0.001	19.03	14.216	Up	3.48106e-127	4.47323e-126
novel_mir5485	0	315	0.001	18.17	14.1493	Up	1.93237e-121	2.44357e-120
novel_mir3636	0	307	0.001	17.7	14.1115	Up	2.23748e-118	2.785e-117
mmu-miR-378b	0	288	0.001	16.61	14.0198	Up	4.22644e-111	5.06216e-110
novel_mir1021	0	288	0.001	16.61	14.0198	Up	4.22644e-111	5.04313e-110
novel_mir3168	0	287	0.001	16.55	14.0145	Up	1.02078e-110	1.21347e-109
novel_mir6147	0	265	0.001	15.28	13.8994	Up	2.7166e-102	3.03609e-101
novel_mir5154	0	257	0.001	14.82	13.8553	Up	3.14552e-99	3.49087e-98
novel_mir4996	0	257	0.001	14.82	13.8553	Up	3.14552e-99	3.4787e-98
novel_mir4950	0	252	0.001	14.53	13.8267	Up	2.58516e-97	2.8392e-96
novel_mir2411	0	245	0.001	14.13	13.7865	Up	1.23936e-94	1.34257e-93
novel_mir3179	0	243	0.001	14.01	13.7742	Up	7.2296e-94	7.80502e-93
novel_mir1225	0	242	0.001	13.96	13.769	Up	1.74612e-93	1.8787e-92
novel_mir2752	0	242	0.001	13.96	13.769	Up	1.74612e-93	1.87236e-92
novel_mir5572	0	240	0.001	13.84	13.7566	Up	1.01857e-92	1.08488e-91
novel_mir4323	0	233	0.001	13.44	13.7142	Up	4.88316e-90	5.04858e-89
novel_mir1454	0	232	0.001	13.38	13.7078	Up	1.1794e-89	1.21146e-88
novel_mir826	0	220	0.001	12.69	13.6314	Up	4.6469e-85	4.66749e-84
novel_mir526	0	217	0.001	12.51	13.6108	Up	6.54696e-84	6.55522e-83
novel_mir5827	0	217	0.001	12.51	13.6108	Up	6.54696e-84	6.53461e-83
novel_mir45	0	216	0.001	12.46	13.605	Up	1.58124e-83	1.57331e-82
mmu-miR-12186-5p	0	215	0.001	12.4	13.5981	Up	3.81906e-83	3.77623e-82
novel_mir4007	0	214	0.001	12.34	13.5911	Up	9.22394e-83	9.09217e-82
novel_mir737	0	214	0.001	12.34	13.5911	Up	9.22394e-83	9.06402e-82
novel_mir4792	0	213	0.001	12.28	13.584	Up	2.2278e-82	2.1757e-81
novel_mir2646	0	207	0.001	11.94	13.5435	Up	4.42208e-80	4.26616e-79
novel_mir4411	0	203	0.001	11.71	13.5155	Up	1.50474e-78	1.43425e-77
novel_mir1407	0	202	0.001	11.65	13.508	Up	3.6343e-78	3.45367e-77
novel_mir280	0	194	0.001	11.19	13.4499	Up	4.20814e-75	3.89406e-74
novel_mir3550	0	193	0.001	11.13	13.4422	Up	1.01636e-74	9.35053e-74
novel_mir909	0	193	0.001	11.13	13.4422	Up	1.01636e-74	9.32351e-74
novel_mir3753	0	192	0.001	11.07	13.4344	Up	2.45474e-74	2.24534e-73
novel_mir5666	0	191	0.001	11.02	13.4278	Up	5.92878e-74	5.40746e-73
novel_mir6045	0	190	0.001	10.96	13.42	Up	1.43194e-73	1.30228e-72
novel_mir9	0	189	0.001	10.9	13.412	Up	3.45846e-73	3.12739e-72
novel_mir1710	0	188	0.001	10.84	13.4041	Up	8.35298e-73	7.53192e-72
novel_mir5131	0	186	0.001	10.73	13.3894	Up	4.87258e-72	4.38118e-71
novel_mir2447	0	182	0.001	10.5	13.3581	Up	1.65803e-70	1.46183e-69
novel_mir1360	0	175	0.001	10.09	13.3006	Up	7.94886e-68	6.95033e-67
novel_mir1925	0	175	0.001	10.09	13.3006	Up	7.94886e-68	6.93123e-67
novel_mir1899	0	175	0.001	10.09	13.3006	Up	7.94886e-68	6.91224e-67
novel_mir2778	0	173	0.001	9.98	13.2848	Up	4.63684e-67	3.98844e-66
novel_mir5752	0	171	0.001	9.86	13.2674	Up	2.70482e-66	2.30164e-65
novel_mir4080	0	169	0.001	9.75	13.2512	Up	1.57782e-65	1.32838e-64
novel_mir3372	0	167	0.001	9.63	13.2333	Up	9.20394e-65	7.64746e-64
novel_mir2040	0	167	0.001	9.63	13.2333	Up	9.20394e-65	7.62749e-64
novel_mir2533	0	165	0.001	9.52	13.2167	Up	5.36898e-64	4.4148e-63
novel_mir2113	0	165	0.001	9.52	13.2167	Up	5.36898e-64	4.4034e-63
novel_mir6132	0	164	0.001	9.46	13.2076	Up	1.29673e-63	1.06078e-62
novel_mir1986	0	164	0.001	9.46	13.2076	Up	1.29673e-63	1.05805e-62
novel_mir4926	0	161	0.001	9.28	13.1799	Up	1.82695e-62	1.48305e-61
novel_mir1079	0	160	0.001	9.23	13.1721	Up	4.4125e-62	3.56368e-61
novel_mir6100	0	158	0.001	9.11	13.1532	Up	2.57396e-61	2.04756e-60
novel_mir4398	0	156	0.001	9	13.1357	Up	1.50148e-60	1.19142e-59
novel_mir5076	0	155	0.001	8.94	13.1261	Up	3.62642e-60	2.84907e-59
novel_mir2800	0	153	0.001	8.82	13.1066	Up	2.11542e-59	1.64165e-58
novel_mir4352	0	153	0.001	8.82	13.1066	Up	2.11542e-59	1.63764e-58
novel_mir378	0	152	0.001	8.77	13.0984	Up	5.1092e-59	3.93607e-58
novel_mir2913	0	149	0.001	8.59	13.0684	Up	7.1983e-58	5.49216e-57
novel_mir1681	0	148	0.001	8.54	13.06	Up	1.73855e-57	1.31385e-56
novel_mir3965	0	148	0.001	8.54	13.06	Up	1.73855e-57	1.31073e-56
novel_mir1960	0	146	0.001	8.42	13.0396	Up	1.01416e-56	7.62781e-56
novel_mir2026	0	143	0.001	8.25	13.0102	Up	1.42883e-55	1.05961e-54
novel_mir5379	0	143	0.001	8.25	13.0102	Up	1.42883e-55	1.05714e-54
novel_mir5651	0	141	0.001	8.13	12.989	Up	8.33488e-55	6.08159e-54
novel_mir51	0	141	0.001	8.13	12.989	Up	8.33488e-55	6.06764e-54
novel_mir5705	0	138	0.001	7.96	12.9586	Up	1.17429e-53	8.43257e-53
novel_mir4103	0	134	0.001	7.73	12.9163	Up	3.99586e-52	2.83733e-51
mmu-miR-340-5p	0	130	0.001	7.5	12.8727	Up	1.3597e-50	9.52693e-50
novel_mir5142	0	128	0.001	7.38	12.8494	Up	7.93162e-50	5.49672e-49
novel_mir1496	0	126	0.001	7.27	12.8277	Up	4.62678e-49	3.15815e-48
novel_mir1936	0	124	0.001	7.15	12.8037	Up	2.69896e-48	1.81494e-47
novel_mir6046	0	123	0.001	7.09	12.7916	Up	6.51862e-48	4.365e-47
novel_mir6004	0	121	0.001	6.98	12.769	Up	3.80252e-47	2.53023e-46
novel_mir1876	0	120	0.001	6.92	12.7566	Up	9.18398e-47	6.07291e-46
novel_mir899	0	119	0.001	6.86	12.744	Up	2.21814e-46	1.46066e-45
novel_mir1578	0	119	0.001	6.86	12.744	Up	2.21814e-46	1.45763e-45
novel_mir5793	0	118	0.001	6.81	12.7334	Up	5.35734e-46	3.49162e-45
novel_mir1967	0	117	0.001	6.75	12.7207	Up	1.29392e-45	8.39857e-45
novel_mir3125	0	116	0.001	6.69	12.7078	Up	3.12512e-45	2.02019e-44
novel_mir4304	0	116	0.001	6.69	12.7078	Up	3.12512e-45	2.01608e-44
novel_mir2217	0	116	0.001	6.69	12.7078	Up	3.12512e-45	2.01199e-44
novel_mir1072	0	115	0.001	6.63	12.6948	Up	7.54788e-45	4.83979e-44
novel_mir5357	0	115	0.001	6.63	12.6948	Up	7.54788e-45	4.83003e-44
novel_mir5319	0	114	0.001	6.57	12.6817	Up	1.82299e-44	1.16188e-43
novel_mir2886	0	114	0.001	6.57	12.6817	Up	1.82299e-44	1.15955e-43
novel_mir2184	0	114	0.001	6.57	12.6817	Up	1.82299e-44	1.15723e-43
novel_mir3582	0	113	0.001	6.52	12.6707	Up	4.40292e-44	2.78384e-43
novel_mir5816	0	111	0.001	6.4	12.6439	Up	2.56838e-43	1.6079e-42
novel_mir693	0	111	0.001	6.4	12.6439	Up	2.56838e-43	1.60473e-42
novel_mir1927	0	109	0.001	6.29	12.6188	Up	1.49822e-42	9.2337e-42
novel_mir5858	0	109	0.001	6.29	12.6188	Up	1.49822e-42	9.21581e-42
novel_mir3457	0	107	0.001	6.17	12.5911	Up	8.73964e-42	5.33454e-41
novel_mir2633	0	105	0.001	6.06	12.5651	Up	5.09814e-41	3.05888e-40
novel_mir2572	0	104	0.001	6	12.5507	Up	1.23132e-40	7.33245e-40
mmu-miR-6961-5p	0	104	0.001	6	12.5507	Up	1.23132e-40	7.31872e-40
novel_mir2846	0	104	0.001	6	12.5507	Up	1.23132e-40	7.30504e-40
mmu-miR-1306-3p	0	103	0.001	5.94	12.5362	Up	2.97392e-40	1.748e-39
novel_mir4251	0	103	0.001	5.94	12.5362	Up	2.97392e-40	1.74477e-39
novel_mir3136	0	102	0.001	5.88	12.5216	Up	7.1827e-40	4.1678e-39
novel_mir370	0	102	0.001	5.88	12.5216	Up	7.1827e-40	4.1602e-39
novel_mir1768	0	101	0.001	5.82	12.5068	Up	1.73479e-39	9.95698e-39
novel_mir4368	0	100	0.001	5.77	12.4944	Up	4.1899e-39	2.37478e-38
novel_mir669	0	100	0.001	5.77	12.4944	Up	4.1899e-39	2.37054e-38
novel_mir3555	0	100	0.001	5.77	12.4944	Up	4.1899e-39	2.36632e-38
novel_mir3096	0	99	0.001	5.71	12.4793	Up	1.01196e-38	5.70508e-38
novel_mir3473	0	98	0.001	5.65	12.464	Up	2.44412e-38	1.36819e-37
novel_mir516	0	97	0.001	5.59	12.4486	Up	5.9031e-38	3.29287e-37
novel_mir3144	0	97	0.001	5.59	12.4486	Up	5.9031e-38	3.28709e-37
novel_mir3419	0	97	0.001	5.59	12.4486	Up	5.9031e-38	3.28134e-37
novel_mir878	0	96	0.001	5.54	12.4357	Up	1.42574e-37	7.8564e-37
mmu-miR-497a-5p	0	95	0.001	5.48	12.42	Up	3.44348e-37	1.88767e-36
novel_mir3393	0	95	0.001	5.48	12.42	Up	3.44348e-37	1.88441e-36
novel_mir5090	0	94	0.001	5.42	12.4041	Up	8.3168e-37	4.52012e-36
mmu-miR-5116	0	94	0.001	5.42	12.4041	Up	8.3168e-37	4.5124e-36
novel_mir3743	0	94	0.001	5.42	12.4041	Up	8.3168e-37	4.5047e-36
novel_mir3420	0	94	0.001	5.42	12.4041	Up	8.3168e-37	4.49702e-36
mmu-miR-28a-5p	0	92	0.001	5.31	12.3745	Up	4.85148e-36	2.588e-35
novel_mir853	0	91	0.001	5.25	12.3581	Up	1.17174e-35	6.17793e-35
mmu-miR-200b-3p	0	91	0.001	5.25	12.3581	Up	1.17174e-35	6.16769e-35
novel_mir5821	0	90	0.001	5.19	12.3415	Up	2.83004e-35	1.48718e-34
novel_mir3415	0	90	0.001	5.19	12.3415	Up	2.83004e-35	1.48472e-34
novel_mir3731	0	89	0.001	5.13	12.3247	Up	6.83518e-35	3.55653e-34
novel_mir2690	0	88	0.001	5.07	12.3078	Up	1.65085e-34	8.4924e-34
novel_mir4546	0	87	0.001	5.02	12.2935	Up	3.9872e-34	2.04449e-33
novel_mir2870	0	87	0.001	5.02	12.2935	Up	3.9872e-34	2.04119e-33
novel_mir1442	0	86	0.001	4.96	12.2761	Up	9.62998e-34	4.89049e-33
novel_mir1210	0	86	0.001	4.96	12.2761	Up	9.62998e-34	4.88268e-33
novel_mir4854	0	85	0.001	4.9	12.2586	Up	2.32586e-33	1.17365e-32
novel_mir1818	0	85	0.001	4.9	12.2586	Up	2.32586e-33	1.17179e-32
novel_mir5599	0	85	0.001	4.9	12.2586	Up	2.32586e-33	1.16993e-32
mmu-miR-210-3p	0	84	0.001	4.84	12.2408	Up	5.6175e-33	2.81229e-32
novel_mir4412	0	82	0.001	4.73	12.2076	Up	3.27688e-32	1.61503e-31
novel_mir3057	0	81	0.001	4.67	12.1892	Up	7.91442e-32	3.87063e-31
novel_mir870	0	81	0.001	4.67	12.1892	Up	7.91442e-32	3.86467e-31
novel_mir3155	0	81	0.001	4.67	12.1892	Up	7.91442e-32	3.85874e-31
novel_mir6119	0	79	0.001	4.56	12.1548	Up	4.61676e-31	2.2102e-30
novel_mir5901	0	79	0.001	4.56	12.1548	Up	4.61676e-31	2.20687e-30
novel_mir1620	0	79	0.001	4.56	12.1548	Up	4.61676e-31	2.20355e-30
novel_mir5907	0	79	0.001	4.56	12.1548	Up	4.61676e-31	2.20024e-30
novel_mir2806	0	79	0.001	4.56	12.1548	Up	4.61676e-31	2.19694e-30
novel_mir4612	0	79	0.001	4.56	12.1548	Up	4.61676e-31	2.19365e-30
novel_mir4178	0	77	0.001	4.44	12.1163	Up	2.6931e-30	1.26823e-29
novel_mir3113	0	77	0.001	4.44	12.1163	Up	2.6931e-30	1.26636e-29
mmu-miR-700-5p	0	76	0.001	4.38	12.0967	Up	6.50448e-30	3.04952e-29
novel_mir1215	0	76	0.001	4.38	12.0967	Up	6.50448e-30	3.04502e-29
novel_mir3657	0	76	0.001	4.38	12.0967	Up	6.50448e-30	3.04053e-29
novel_mir892	0	76	0.001	4.38	12.0967	Up	6.50448e-30	3.03606e-29
novel_mir5797	0	74	0.001	4.27	12.06	Up	3.79428e-29	1.75044e-28
novel_mir165	0	74	0.001	4.27	12.06	Up	3.79428e-29	1.7479e-28
novel_mir5789	0	74	0.001	4.27	12.06	Up	3.79428e-29	1.74537e-28
novel_mir2074	0	74	0.001	4.27	12.06	Up	3.79428e-29	1.74284e-28
novel_mir1766	0	73	0.001	4.21	12.0396	Up	9.16408e-29	4.18515e-28
novel_mir3757	0	73	0.001	4.21	12.0396	Up	9.16408e-29	4.17914e-28
novel_mir5992	0	73	0.001	4.21	12.0396	Up	9.16408e-29	4.17314e-28
novel_mir6054	0	72	0.001	4.15	12.0189	Up	2.21334e-28	1.00216e-27
novel_mir167	0	72	0.001	4.15	12.0189	Up	2.21334e-28	1.00073e-27
novel_mir3107	0	71	0.001	4.09	11.9979	Up	5.34572e-28	2.39651e-27
novel_mir804	0	71	0.001	4.09	11.9979	Up	5.34572e-28	2.39313e-27
novel_mir616	0	71	0.001	4.09	11.9979	Up	5.34572e-28	2.38976e-27
novel_mir4221	0	70	0.001	4.04	11.9801	Up	1.29111e-27	5.73949e-27
novel_mir4449	0	70	0.001	4.04	11.9801	Up	1.29111e-27	5.73146e-27
novel_mir1786	0	69	0.001	3.98	11.9586	Up	3.11834e-27	1.36519e-26
novel_mir4359	0	69	0.001	3.98	11.9586	Up	3.11834e-27	1.36331e-26
novel_mir5721	0	68	0.001	3.92	11.9366	Up	7.5315e-27	3.26571e-26
novel_mir2294	0	68	0.001	3.92	11.9366	Up	7.5315e-27	3.26125e-26
novel_mir1585	0	68	0.001	3.92	11.9366	Up	7.5315e-27	3.25681e-26
novel_mir1062	0	68	0.001	3.92	11.9366	Up	7.5315e-27	3.25238e-26
novel_mir5433	0	68	0.001	3.92	11.9366	Up	7.5315e-27	3.24796e-26
novel_mir5956	0	67	0.001	3.86	11.9144	Up	1.81903e-26	7.82332e-26
novel_mir3887	0	67	0.001	3.86	11.9144	Up	1.81903e-26	7.81273e-26
novel_mir1663	0	66	0.001	3.81	11.8956	Up	4.39338e-26	1.87932e-25
novel_mir1429	0	65	0.001	3.75	11.8727	Up	1.0611e-25	4.5026e-25
mmu-miR-199a-5p	0	65	0.001	3.75	11.8727	Up	1.0611e-25	4.49659e-25
novel_mir5395	0	65	0.001	3.75	11.8727	Up	1.0611e-25	4.49059e-25
mmu-miR-20b-5p	0	64	0.001	3.69	11.8494	Up	2.56282e-25	1.08026e-24
novel_mir3248	0	64	0.001	3.69	11.8494	Up	2.56282e-25	1.07883e-24
novel_mir1603	0	64	0.001	3.69	11.8494	Up	2.56282e-25	1.0774e-24
novel_mir2078	0	64	0.001	3.69	11.8494	Up	2.56282e-25	1.07598e-24
novel_mir5137	0	63	0.001	3.63	11.8258	Up	6.18978e-25	2.58505e-24
novel_mir3147	0	63	0.001	3.63	11.8258	Up	6.18978e-25	2.58165e-24
novel_mir5273	0	63	0.001	3.63	11.8258	Up	6.18978e-25	2.57826e-24
novel_mir3911	0	62	0.001	3.58	11.8057	Up	1.49497e-24	6.1624e-24
novel_mir3733	0	62	0.001	3.58	11.8057	Up	1.49497e-24	6.15441e-24
novel_mir1702	0	62	0.001	3.58	11.8057	Up	1.49497e-24	6.14643e-24
novel_mir4491	0	62	0.001	3.58	11.8057	Up	1.49497e-24	6.13848e-24
novel_mir2982	0	61	0.001	3.52	11.7814	Up	3.6107e-24	1.47116e-23
mmu-let-7e-5p	0	61	0.001	3.52	11.7814	Up	3.6107e-24	1.46928e-23
novel_mir3563	0	61	0.001	3.52	11.7814	Up	3.6107e-24	1.4674e-23
mmu-miR-410-3p	0	61	0.001	3.52	11.7814	Up	3.6107e-24	1.46552e-23
novel_mir2274	0	61	0.001	3.52	11.7814	Up	3.6107e-24	1.46365e-23
novel_mir3110	0	60	0.001	3.46	11.7566	Up	8.7207e-24	3.50818e-23
novel_mir2940	0	60	0.001	3.46	11.7566	Up	8.7207e-24	3.50373e-23
novel_mir2865	0	60	0.001	3.46	11.7566	Up	8.7207e-24	3.4993e-23
novel_mir4452	0	60	0.001	3.46	11.7566	Up	8.7207e-24	3.49489e-23
novel_mir5436	0	60	0.001	3.46	11.7566	Up	8.7207e-24	3.49048e-23
novel_mir3987	0	59	0.001	3.4	11.7313	Up	2.10624e-23	8.32529e-23
novel_mir3983	0	59	0.001	3.4	11.7313	Up	2.10624e-23	8.31493e-23
mmu-miR-669a-3p,mmu-miR-669o-3p	0	58	0.001	3.34	11.7056	Up	5.08708e-23	1.99832e-22
novel_mir3638	0	58	0.001	3.34	11.7056	Up	5.08708e-23	1.99585e-22
novel_mir942	0	58	0.001	3.34	11.7056	Up	5.08708e-23	1.99338e-22
novel_mir6074	0	57	0.001	3.29	11.6839	Up	1.22865e-22	4.77908e-22
novel_mir6106	0	57	0.001	3.29	11.6839	Up	1.22865e-22	4.77323e-22
mmu-miR-701-5p	0	56	0.001	3.23	11.6573	Up	2.96746e-22	1.14305e-21
novel_mir5205	0	56	0.001	3.23	11.6573	Up	2.96746e-22	1.14166e-21
novel_mir3578	0	56	0.001	3.23	11.6573	Up	2.96746e-22	1.14028e-21
mmu-miR-29c-3p	0	56	0.001	3.23	11.6573	Up	2.96746e-22	1.1389e-21
novel_mir2021	0	56	0.001	3.23	11.6573	Up	2.96746e-22	1.13753e-21
novel_mir1972	0	55	0.001	3.17	11.6303	Up	7.16712e-22	2.72436e-21
novel_mir1222	0	55	0.001	3.17	11.6303	Up	7.16712e-22	2.72111e-21
novel_mir2995	0	55	0.001	3.17	11.6303	Up	7.16712e-22	2.71785e-21
novel_mir2568	0	55	0.001	3.17	11.6303	Up	7.16712e-22	2.71461e-21
novel_mir2357	0	54	0.001	3.11	11.6027	Up	1.73102e-21	6.49441e-21
novel_mir5630	0	54	0.001	3.11	11.6027	Up	1.73102e-21	6.48674e-21
novel_mir5108	0	54	0.001	3.11	11.6027	Up	1.73102e-21	6.47909e-21
novel_mir2197	0	54	0.001	3.11	11.6027	Up	1.73102e-21	6.47146e-21
novel_mir5300	0	54	0.001	3.11	11.6027	Up	1.73102e-21	6.46385e-21
novel_mir2105	0	54	0.001	3.11	11.6027	Up	1.73102e-21	6.45625e-21
novel_mir1570	0	54	0.001	3.11	11.6027	Up	1.73102e-21	6.44867e-21
novel_mir5342	0	53	0.001	3.06	11.5793	Up	4.18082e-21	1.54661e-20
novel_mir252	0	53	0.001	3.06	11.5793	Up	4.18082e-21	1.54481e-20
novel_mir2549	0	53	0.001	3.06	11.5793	Up	4.18082e-21	1.54301e-20
novel_mir3920	0	53	0.001	3.06	11.5793	Up	4.18082e-21	1.54122e-20
novel_mir4479	0	52	0.001	3	11.5507	Up	1.00977e-20	3.69665e-20
novel_mir5157	0	52	0.001	3	11.5507	Up	1.00977e-20	3.69239e-20
novel_mir3870	0	51	0.001	2.94	11.5216	Up	2.43882e-20	8.85677e-20
mmu-miR-3077-3p	0	51	0.001	2.94	11.5216	Up	2.43882e-20	8.84665e-20
novel_mir3039	0	51	0.001	2.94	11.5216	Up	2.43882e-20	8.83655e-20
novel_mir4676	0	51	0.001	2.94	11.5216	Up	2.43882e-20	8.82647e-20
novel_mir2438	0	50	0.001	2.88	11.4919	Up	5.8903e-20	2.11971e-19
novel_mir4086	0	50	0.001	2.88	11.4919	Up	5.8903e-20	2.11731e-19
novel_mir4430	0	50	0.001	2.88	11.4919	Up	5.8903e-20	2.11491e-19
novel_mir2926	0	50	0.001	2.88	11.4919	Up	5.8903e-20	2.11252e-19
novel_mir4716	0	50	0.001	2.88	11.4919	Up	5.8903e-20	2.11014e-19
novel_mir4413	0	49	0.001	2.83	11.4666	Up	1.42265e-19	5.03398e-19
novel_mir4802	0	49	0.001	2.83	11.4666	Up	1.42265e-19	5.02837e-19
novel_mir4822	0	48	0.001	2.77	11.4357	Up	3.43602e-19	1.19845e-18
novel_mir4511	0	48	0.001	2.77	11.4357	Up	3.43602e-19	1.19714e-18
mmu-miR-503-5p	0	48	0.001	2.77	11.4357	Up	3.43602e-19	1.19583e-18
novel_mir3686	0	48	0.001	2.77	11.4357	Up	3.43602e-19	1.19452e-18
novel_mir243	0	48	0.001	2.77	11.4357	Up	3.43602e-19	1.19321e-18
novel_mir1010	0	47	0.001	2.71	11.4041	Up	8.29878e-19	2.85377e-18
novel_mir6013	0	47	0.001	2.71	11.4041	Up	8.29878e-19	2.85068e-18
novel_mir1542	0	47	0.001	2.71	11.4041	Up	8.29878e-19	2.8476e-18
novel_mir1661	0	47	0.001	2.71	11.4041	Up	8.29878e-19	2.84453e-18
novel_mir295	0	47	0.001	2.71	11.4041	Up	8.29878e-19	2.84146e-18
novel_mir486	0	47	0.001	2.71	11.4041	Up	8.29878e-19	2.8384e-18
novel_mir727	0	47	0.001	2.71	11.4041	Up	8.29878e-19	2.83534e-18
novel_mir2366	0	46	0.001	2.65	11.3718	Up	2.00434e-18	6.76785e-18
novel_mir3412	0	46	0.001	2.65	11.3718	Up	2.00434e-18	6.76065e-18
novel_mir5939	0	46	0.001	2.65	11.3718	Up	2.00434e-18	6.75348e-18
novel_mir6099	0	46	0.001	2.65	11.3718	Up	2.00434e-18	6.74632e-18
novel_mir5259	0	45	0.001	2.6	11.3443	Up	4.84096e-18	1.61739e-17
novel_mir5006	0	45	0.001	2.6	11.3443	Up	4.84096e-18	1.61569e-17
novel_mir5716	0	45	0.001	2.6	11.3443	Up	4.84096e-18	1.61399e-17
novel_mir1811	0	45	0.001	2.6	11.3443	Up	4.84096e-18	1.6123e-17
novel_mir4673	0	44	0.001	2.54	11.3106	Up	1.1692e-17	3.88185e-17
novel_mir1534	0	44	0.001	2.54	11.3106	Up	1.1692e-17	3.87779e-17
novel_mir2668	0	44	0.001	2.54	11.3106	Up	1.1692e-17	3.87374e-17
novel_mir247	0	43	0.001	2.48	11.2761	Up	2.8239e-17	9.26893e-17
novel_mir2327	0	43	0.001	2.48	11.2761	Up	2.8239e-17	9.25936e-17
novel_mir2703	0	43	0.001	2.48	11.2761	Up	2.8239e-17	9.2498e-17
novel_mir4021	0	43	0.001	2.48	11.2761	Up	2.8239e-17	9.24027e-17
novel_mir296	0	43	0.001	2.48	11.2761	Up	2.8239e-17	9.23075e-17
mmu-miR-6956-3p	0	43	0.001	2.48	11.2761	Up	2.8239e-17	9.22125e-17
novel_mir4501	0	43	0.001	2.48	11.2761	Up	2.8239e-17	9.21178e-17
novel_mir4469	0	42	0.001	2.42	11.2408	Up	6.82036e-17	2.19552e-16
novel_mir2089	0	42	0.001	2.42	11.2408	Up	6.82036e-17	2.1933e-16
novel_mir1819	0	42	0.001	2.42	11.2408	Up	6.82036e-17	2.19108e-16
novel_mir2986	0	42	0.001	2.42	11.2408	Up	6.82036e-17	2.18886e-16
novel_mir3206	0	42	0.001	2.42	11.2408	Up	6.82036e-17	2.18665e-16
novel_mir583	0	42	0.001	2.42	11.2408	Up	6.82036e-17	2.18444e-16
novel_mir5980	0	41	0.001	2.36	11.2046	Up	1.64727e-16	5.23893e-16
novel_mir2612	0	41	0.001	2.36	11.2046	Up	1.64727e-16	5.23368e-16
novel_mir3940	0	41	0.001	2.36	11.2046	Up	1.64727e-16	5.22845e-16
novel_mir4133	0	41	0.001	2.36	11.2046	Up	1.64727e-16	5.22322e-16
novel_mir4010	0	41	0.001	2.36	11.2046	Up	1.64727e-16	5.21801e-16
novel_mir3916	0	41	0.001	2.36	11.2046	Up	1.64727e-16	5.21281e-16
novel_mir2631	0	41	0.001	2.36	11.2046	Up	1.64727e-16	5.20762e-16
mmu-miR-6980-3p	0	41	0.001	2.36	11.2046	Up	1.64727e-16	5.20244e-16
novel_mir4661	0	40	0.001	2.31	11.1737	Up	3.97854e-16	1.23319e-15
novel_mir1761	0	39	0.001	2.25	11.1357	Up	9.60912e-16	2.91302e-15
novel_mir3878	0	39	0.001	2.25	11.1357	Up	9.60912e-16	2.91024e-15
novel_mir5447	0	39	0.001	2.25	11.1357	Up	9.60912e-16	2.90747e-15
novel_mir557	0	39	0.001	2.25	11.1357	Up	9.60912e-16	2.9047e-15
novel_mir3495	0	39	0.001	2.25	11.1357	Up	9.60912e-16	2.90194e-15
novel_mir722	0	39	0.001	2.25	11.1357	Up	9.60912e-16	2.89918e-15
novel_mir2474	0	38	0.001	2.19	11.0967	Up	2.32082e-15	6.9232e-15
novel_mir4336	0	38	0.001	2.19	11.0967	Up	2.32082e-15	6.9167e-15
novel_mir4587	0	38	0.001	2.19	11.0967	Up	2.32082e-15	6.91021e-15
novel_mir5026	0	38	0.001	2.19	11.0967	Up	2.32082e-15	6.90373e-15
novel_mir4459	0	38	0.001	2.19	11.0967	Up	2.32082e-15	6.89727e-15
novel_mir1395	0	37	0.001	2.13	11.0566	Up	5.60532e-15	1.63223e-14
novel_mir5555	0	37	0.001	2.13	11.0566	Up	5.60532e-15	1.63073e-14
novel_mir1465	0	37	0.001	2.13	11.0566	Up	5.60532e-15	1.62924e-14
novel_mir4591	0	37	0.001	2.13	11.0566	Up	5.60532e-15	1.62775e-14
novel_mir964	0	37	0.001	2.13	11.0566	Up	5.60532e-15	1.62626e-14
novel_mir4897	0	37	0.001	2.13	11.0566	Up	5.60532e-15	1.62477e-14
novel_mir4687	0	37	0.001	2.13	11.0566	Up	5.60532e-15	1.62329e-14
novel_mir2368	0	37	0.001	2.13	11.0566	Up	5.60532e-15	1.62181e-14
novel_mir4481	0	36	0.001	2.08	11.0224	Up	1.35381e-14	3.87467e-14
novel_mir4053	0	36	0.001	2.08	11.0224	Up	1.35381e-14	3.87118e-14
novel_mir4525	0	36	0.001	2.08	11.0224	Up	1.35381e-14	3.86769e-14
novel_mir4401	0	36	0.001	2.08	11.0224	Up	1.35381e-14	3.86421e-14
novel_mir2613	0	36	0.001	2.08	11.0224	Up	1.35381e-14	3.86074e-14
novel_mir2737	0	36	0.001	2.08	11.0224	Up	1.35381e-14	3.85728e-14
novel_mir794	0	35	0.001	2.02	10.9801	Up	3.26978e-14	9.14386e-14
novel_mir4179	0	35	0.001	2.02	10.9801	Up	3.26978e-14	9.13581e-14
novel_mir2444	0	35	0.001	2.02	10.9801	Up	3.26978e-14	9.12778e-14
novel_mir3504	0	35	0.001	2.02	10.9801	Up	3.26978e-14	9.11976e-14
novel_mir2067	0	35	0.001	2.02	10.9801	Up	3.26978e-14	9.11175e-14
novel_mir1849	0	35	0.001	2.02	10.9801	Up	3.26978e-14	9.10376e-14
novel_mir4690	0	35	0.001	2.02	10.9801	Up	3.26978e-14	9.09578e-14
novel_mir5469	0	35	0.001	2.02	10.9801	Up	3.26978e-14	9.08781e-14
novel_mir2008	0	35	0.001	2.02	10.9801	Up	3.26978e-14	9.07986e-14
novel_mir897	0	35	0.001	2.02	10.9801	Up	3.26978e-14	9.07192e-14
novel_mir861	0	35	0.001	2.02	10.9801	Up	3.26978e-14	9.064e-14
novel_mir228	0	35	0.001	2.02	10.9801	Up	3.26978e-14	9.05609e-14
novel_mir3265	0	35	0.001	2.02	10.9801	Up	3.26978e-14	9.0482e-14
novel_mir1588	0	35	0.001	2.02	10.9801	Up	3.26978e-14	9.04032e-14
novel_mir2233	0	35	0.001	2.02	10.9801	Up	3.26978e-14	9.03245e-14
novel_mir625	0	34	0.001	1.96	10.9366	Up	7.89726e-14	2.14056e-13
novel_mir4280	0	34	0.001	1.96	10.9366	Up	7.89726e-14	2.13873e-13
novel_mir5541	0	34	0.001	1.96	10.9366	Up	7.89726e-14	2.13691e-13
novel_mir4945	0	34	0.001	1.96	10.9366	Up	7.89726e-14	2.13509e-13
novel_mir2766	0	34	0.001	1.96	10.9366	Up	7.89726e-14	2.13327e-13
novel_mir1185	0	34	0.001	1.96	10.9366	Up	7.89726e-14	2.13145e-13
novel_mir1682	0	33	0.001	1.9	10.8918	Up	1.90737e-13	5.08739e-13
novel_mir1902	0	33	0.001	1.9	10.8918	Up	1.90737e-13	5.08312e-13
novel_mir3868	0	33	0.001	1.9	10.8918	Up	1.90737e-13	5.07886e-13
novel_mir1070	0	33	0.001	1.9	10.8918	Up	1.90737e-13	5.0746e-13
novel_mir3838	0	33	0.001	1.9	10.8918	Up	1.90737e-13	5.07035e-13
novel_mir4275	0	33	0.001	1.9	10.8918	Up	1.90737e-13	5.06611e-13
novel_mir325	0	33	0.001	1.9	10.8918	Up	1.90737e-13	5.06187e-13
novel_mir2860	0	33	0.001	1.9	10.8918	Up	1.90737e-13	5.05764e-13
novel_mir6000	0	33	0.001	1.9	10.8918	Up	1.90737e-13	5.05342e-13
novel_mir4432	0	33	0.001	1.9	10.8918	Up	1.90737e-13	5.04921e-13
novel_mir1162	0	33	0.001	1.9	10.8918	Up	1.90737e-13	5.045e-13
novel_mir2034	0	33	0.001	1.9	10.8918	Up	1.90737e-13	5.0408e-13
novel_mir2052	0	32	0.001	1.85	10.8533	Up	4.60674e-13	1.20048e-12
novel_mir318	0	32	0.001	1.85	10.8533	Up	4.60674e-13	1.19949e-12
mmu-miR-132-5p	0	32	0.001	1.85	10.8533	Up	4.60674e-13	1.19851e-12
mmu-miR-879-5p	0	32	0.001	1.85	10.8533	Up	4.60674e-13	1.19753e-12
novel_mir2898	0	32	0.001	1.85	10.8533	Up	4.60674e-13	1.19655e-12
novel_mir2373	0	32	0.001	1.85	10.8533	Up	4.60674e-13	1.19557e-12
novel_mir1594	0	32	0.001	1.85	10.8533	Up	4.60674e-13	1.19459e-12
novel_mir4776	0	32	0.001	1.85	10.8533	Up	4.60674e-13	1.19362e-12
novel_mir5856	0	31	0.001	1.79	10.8057	Up	1.11263e-12	2.8434e-12
novel_mir1662	0	31	0.001	1.79	10.8057	Up	1.11263e-12	2.84111e-12
novel_mir4707	0	31	0.001	1.79	10.8057	Up	1.11263e-12	2.83883e-12
novel_mir484	0	31	0.001	1.79	10.8057	Up	1.11263e-12	2.83655e-12
novel_mir5576	0	31	0.001	1.79	10.8057	Up	1.11263e-12	2.83427e-12
novel_mir6006	0	31	0.001	1.79	10.8057	Up	1.11263e-12	2.832e-12
mmu-miR-190b-5p	0	30	0.001	1.73	10.7566	Up	2.68726e-12	6.74258e-12
novel_mir4308	0	30	0.001	1.73	10.7566	Up	2.68726e-12	6.73725e-12
novel_mir2286	0	30	0.001	1.73	10.7566	Up	2.68726e-12	6.73194e-12
novel_mir1975	0	30	0.001	1.73	10.7566	Up	2.68726e-12	6.72663e-12
novel_mir5354	0	30	0.001	1.73	10.7566	Up	2.68726e-12	6.72133e-12
novel_mir1161	0	30	0.001	1.73	10.7566	Up	2.68726e-12	6.71603e-12
novel_mir5522	0	30	0.001	1.73	10.7566	Up	2.68726e-12	6.71075e-12
novel_mir4484	0	30	0.001	1.73	10.7566	Up	2.68726e-12	6.70547e-12
novel_mir5401	0	29	0.001	1.67	10.7056	Up	6.49038e-12	1.58709e-11
novel_mir5181	0	29	0.001	1.67	10.7056	Up	6.49038e-12	1.58587e-11
novel_mir561	0	29	0.001	1.67	10.7056	Up	6.49038e-12	1.58465e-11
mmu-miR-3087-3p	0	29	0.001	1.67	10.7056	Up	6.49038e-12	1.58343e-11
novel_mir5674	0	29	0.001	1.67	10.7056	Up	6.49038e-12	1.58222e-11
novel_mir1251	0	29	0.001	1.67	10.7056	Up	6.49038e-12	1.581e-11
novel_mir56	0	29	0.001	1.67	10.7056	Up	6.49038e-12	1.57979e-11
mmu-miR-450b-3p	0	29	0.001	1.67	10.7056	Up	6.49038e-12	1.57858e-11
novel_mir2091	0	29	0.001	1.67	10.7056	Up	6.49038e-12	1.57737e-11
mmu-miR-7682-3p	0	29	0.001	1.67	10.7056	Up	6.49038e-12	1.57616e-11
novel_mir4363	0	29	0.001	1.67	10.7056	Up	6.49038e-12	1.57496e-11
novel_mir1274	0	28	0.001	1.61	10.6528	Up	1.56758e-11	3.71582e-11
novel_mir4014	0	28	0.001	1.61	10.6528	Up	1.56758e-11	3.71305e-11
novel_mir2174	0	28	0.001	1.61	10.6528	Up	1.56758e-11	3.71028e-11
novel_mir2360	0	28	0.001	1.61	10.6528	Up	1.56758e-11	3.70752e-11
novel_mir465	0	28	0.001	1.61	10.6528	Up	1.56758e-11	3.70476e-11
novel_mir6037	0	28	0.001	1.61	10.6528	Up	1.56758e-11	3.702e-11
novel_mir5783	0	28	0.001	1.61	10.6528	Up	1.56758e-11	3.69925e-11
novel_mir4183	0	28	0.001	1.61	10.6528	Up	1.56758e-11	3.6965e-11
novel_mir3750	0	28	0.001	1.61	10.6528	Up	1.56758e-11	3.69375e-11
novel_mir869	0	27	0.001	1.56	10.6073	Up	3.78606e-11	8.80363e-11
novel_mir1437	0	27	0.001	1.56	10.6073	Up	3.78606e-11	8.79718e-11
novel_mir4992	0	27	0.001	1.56	10.6073	Up	3.78606e-11	8.79075e-11
novel_mir882	0	27	0.001	1.56	10.6073	Up	3.78606e-11	8.78432e-11
novel_mir2016	0	27	0.001	1.56	10.6073	Up	3.78606e-11	8.77791e-11
novel_mir5194	0	27	0.001	1.56	10.6073	Up	3.78606e-11	8.7715e-11
novel_mir3225	0	27	0.001	1.56	10.6073	Up	3.78606e-11	8.7651e-11
novel_mir1701	0	27	0.001	1.56	10.6073	Up	3.78606e-11	8.75871e-11
novel_mir3200	0	27	0.001	1.56	10.6073	Up	3.78606e-11	8.75233e-11
novel_mir4649	0	27	0.001	1.56	10.6073	Up	3.78606e-11	8.74596e-11
novel_mir3558	0	27	0.001	1.56	10.6073	Up	3.78606e-11	8.7396e-11
novel_mir846	0	27	0.001	1.56	10.6073	Up	3.78606e-11	8.73325e-11
novel_mir5070	0	27	0.001	1.56	10.6073	Up	3.78606e-11	8.72691e-11
novel_mir4669	0	27	0.001	1.56	10.6073	Up	3.78606e-11	8.72058e-11
novel_mir2644	0	26	0.001	1.5	10.5507	Up	9.1442e-11	2.05842e-10
novel_mir4859	0	26	0.001	1.5	10.5507	Up	9.1442e-11	2.05696e-10
novel_mir4435	0	26	0.001	1.5	10.5507	Up	9.1442e-11	2.0555e-10
novel_mir4079	0	26	0.001	1.5	10.5507	Up	9.1442e-11	2.05405e-10
novel_mir1520	0	26	0.001	1.5	10.5507	Up	9.1442e-11	2.05259e-10
novel_mir109	0	26	0.001	1.5	10.5507	Up	9.1442e-11	2.05114e-10
novel_mir3153	0	26	0.001	1.5	10.5507	Up	9.1442e-11	2.0497e-10
novel_mir458	0	26	0.001	1.5	10.5507	Up	9.1442e-11	2.04825e-10
novel_mir2622	0	26	0.001	1.5	10.5507	Up	9.1442e-11	2.0468e-10
novel_mir5545	0	26	0.001	1.5	10.5507	Up	9.1442e-11	2.04536e-10
novel_mir5065	0	25	0.001	1.44	10.4919	Up	2.20854e-10	4.81119e-10
novel_mir1999	0	25	0.001	1.44	10.4919	Up	2.20854e-10	4.80789e-10
novel_mir4889	0	25	0.001	1.44	10.4919	Up	2.20854e-10	4.8046e-10
novel_mir4917	0	25	0.001	1.44	10.4919	Up	2.20854e-10	4.80131e-10
novel_mir1529	0	25	0.001	1.44	10.4919	Up	2.20854e-10	4.79802e-10
novel_mir6127	0	25	0.001	1.44	10.4919	Up	2.20854e-10	4.79474e-10
novel_mir1771	0	24	0.001	1.38	10.4305	Up	5.33412e-10	1.13933e-09
novel_mir5043	0	24	0.001	1.38	10.4305	Up	5.33412e-10	1.13857e-09
mmu-miR-6971-3p	0	24	0.001	1.38	10.4305	Up	5.33412e-10	1.1378e-09
novel_mir884	0	24	0.001	1.38	10.4305	Up	5.33412e-10	1.13704e-09
novel_mir2961	0	24	0.001	1.38	10.4305	Up	5.33412e-10	1.13627e-09
novel_mir5741	0	24	0.001	1.38	10.4305	Up	5.33412e-10	1.13551e-09
novel_mir459	0	24	0.001	1.38	10.4305	Up	5.33412e-10	1.13475e-09
novel_mir1601	0	23	0.001	1.33	10.3772	Up	1.28831e-09	2.62796e-09
novel_mir4428	0	23	0.001	1.33	10.3772	Up	1.28831e-09	2.62627e-09
novel_mir6135	0	23	0.001	1.33	10.3772	Up	1.28831e-09	2.62459e-09
novel_mir2158	0	23	0.001	1.33	10.3772	Up	1.28831e-09	2.6229e-09
novel_mir177	0	23	0.001	1.33	10.3772	Up	1.28831e-09	2.62122e-09
novel_mir2290	0	23	0.001	1.33	10.3772	Up	1.28831e-09	2.61954e-09
novel_mir5441	0	23	0.001	1.33	10.3772	Up	1.28831e-09	2.61787e-09
novel_mir673	0	23	0.001	1.33	10.3772	Up	1.28831e-09	2.61619e-09
novel_mir5792	0	23	0.001	1.33	10.3772	Up	1.28831e-09	2.61452e-09
novel_mir1469	0	22	0.001	1.27	10.3106	Up	3.11158e-09	6.07016e-09
novel_mir4601	0	22	0.001	1.27	10.3106	Up	3.11158e-09	6.06643e-09
novel_mir1911	0	22	0.001	1.27	10.3106	Up	3.11158e-09	6.06271e-09
novel_mir2942	0	22	0.001	1.27	10.3106	Up	3.11158e-09	6.05899e-09
novel_mir2536	0	22	0.001	1.27	10.3106	Up	3.11158e-09	6.05528e-09
novel_mir1102	0	22	0.001	1.27	10.3106	Up	3.11158e-09	6.05157e-09
novel_mir5575	0	22	0.001	1.27	10.3106	Up	3.11158e-09	6.04786e-09
novel_mir3747	0	22	0.001	1.27	10.3106	Up	3.11158e-09	6.04416e-09
novel_mir2221	0	22	0.001	1.27	10.3106	Up	3.11158e-09	6.04046e-09
novel_mir3603	0	21	0.001	1.21	10.2408	Up	7.51518e-09	1.42492e-08
novel_mir384	0	21	0.001	1.21	10.2408	Up	7.51518e-09	1.42407e-08
novel_mir5645	0	21	0.001	1.21	10.2408	Up	7.51518e-09	1.42322e-08
novel_mir1712	0	21	0.001	1.21	10.2408	Up	7.51518e-09	1.42237e-08
novel_mir2427	0	21	0.001	1.21	10.2408	Up	7.51518e-09	1.42152e-08
novel_mir5553	0	21	0.001	1.21	10.2408	Up	7.51518e-09	1.42068e-08
novel_mir546	0	21	0.001	1.21	10.2408	Up	7.51518e-09	1.41983e-08
novel_mir4622	0	21	0.001	1.21	10.2408	Up	7.51518e-09	1.41899e-08
novel_mir4131	0	21	0.001	1.21	10.2408	Up	7.51518e-09	1.41814e-08
novel_mir6109	0	21	0.001	1.21	10.2408	Up	7.51518e-09	1.4173e-08
novel_mir2372	0	21	0.001	1.21	10.2408	Up	7.51518e-09	1.41646e-08
novel_mir543	0	21	0.001	1.21	10.2408	Up	7.51518e-09	1.41562e-08
novel_mir6088	0	21	0.001	1.21	10.2408	Up	7.51518e-09	1.41478e-08
novel_mir5180	0	21	0.001	1.21	10.2408	Up	7.51518e-09	1.41394e-08
novel_mir2673	0	21	0.001	1.21	10.2408	Up	7.51518e-09	1.4131e-08
novel_mir6080	0	21	0.001	1.21	10.2408	Up	7.51518e-09	1.41227e-08
novel_mir263	0	21	0.001	1.21	10.2408	Up	7.51518e-09	1.41143e-08
novel_mir750	0	21	0.001	1.21	10.2408	Up	7.51518e-09	1.4106e-08
novel_mir3741	0	20	0.001	1.15	10.1674	Up	1.81509e-08	3.29205e-08
novel_mir3282	0	20	0.001	1.15	10.1674	Up	1.81509e-08	3.29017e-08
novel_mir5796	0	20	0.001	1.15	10.1674	Up	1.81509e-08	3.2883e-08
novel_mir947	0	20	0.001	1.15	10.1674	Up	1.81509e-08	3.28642e-08
novel_mir3952	0	20	0.001	1.15	10.1674	Up	1.81509e-08	3.28455e-08
novel_mir5583	0	20	0.001	1.15	10.1674	Up	1.81509e-08	3.28268e-08
novel_mir1856	0	20	0.001	1.15	10.1674	Up	1.81509e-08	3.28081e-08
novel_mir149	0	20	0.001	1.15	10.1674	Up	1.81509e-08	3.27894e-08
novel_mir2520	0	20	0.001	1.15	10.1674	Up	1.81509e-08	3.27707e-08
novel_mir2281	0	20	0.001	1.15	10.1674	Up	1.81509e-08	3.27521e-08
novel_mir3990	0	19	0.001	1.1	10.1033	Up	4.38386e-08	7.58276e-08
novel_mir1187	0	19	0.001	1.1	10.1033	Up	4.38386e-08	7.57863e-08
mmu-miR-3079-5p	0	19	0.001	1.1	10.1033	Up	4.38386e-08	7.57451e-08
novel_mir1158	0	19	0.001	1.1	10.1033	Up	4.38386e-08	7.57039e-08
novel_mir4462	0	19	0.001	1.1	10.1033	Up	4.38386e-08	7.56627e-08
mmu-miR-142a-3p	0	19	0.001	1.1	10.1033	Up	4.38386e-08	7.56216e-08
novel_mir1141	0	19	0.001	1.1	10.1033	Up	4.38386e-08	7.55805e-08
novel_mir1961	0	19	0.001	1.1	10.1033	Up	4.38386e-08	7.55395e-08
novel_mir5820	0	19	0.001	1.1	10.1033	Up	4.38386e-08	7.54985e-08
novel_mir695	0	19	0.001	1.1	10.1033	Up	4.38386e-08	7.54575e-08
novel_mir1794	0	19	0.001	1.1	10.1033	Up	4.38386e-08	7.54166e-08
novel_mir5237	0	19	0.001	1.1	10.1033	Up	4.38386e-08	7.53758e-08
novel_mir4232	0	19	0.001	1.1	10.1033	Up	4.38386e-08	7.5335e-08
novel_mir1581	0	18	0.001	1.04	10.0224	Up	1.0588e-07	1.78758e-07
novel_mir3442	0	18	0.001	1.04	10.0224	Up	1.0588e-07	1.78663e-07
novel_mir1556	0	18	0.001	1.04	10.0224	Up	1.0588e-07	1.78568e-07
novel_mir704	0	18	0.001	1.04	10.0224	Up	1.0588e-07	1.78473e-07
novel_mir5690	0	18	0.001	1.04	10.0224	Up	1.0588e-07	1.78378e-07
novel_mir3104	0	18	0.001	1.04	10.0224	Up	1.0588e-07	1.78283e-07
novel_mir30	0	18	0.001	1.04	10.0224	Up	1.0588e-07	1.78189e-07
novel_mir5765	0	18	0.001	1.04	10.0224	Up	1.0588e-07	1.78095e-07
novel_mir3768	0	18	0.001	1.04	10.0224	Up	1.0588e-07	1.78e-07
novel_mir500	0	18	0.001	1.04	10.0224	Up	1.0588e-07	1.77906e-07
novel_mir2992	0	18	0.001	1.04	10.0224	Up	1.0588e-07	1.77812e-07
novel_mir4668	0	18	0.001	1.04	10.0224	Up	1.0588e-07	1.77718e-07
novel_mir4450	0	18	0.001	1.04	10.0224	Up	1.0588e-07	1.77624e-07
novel_mir387	0	18	0.001	1.04	10.0224	Up	1.0588e-07	1.7753e-07
novel_mir1019	0	18	0.001	1.04	10.0224	Up	1.0588e-07	1.77436e-07
novel_mir4247	0	18	0.001	1.04	10.0224	Up	1.0588e-07	1.77343e-07
novel_mir1799	0	18	0.001	1.04	10.0224	Up	1.0588e-07	1.77249e-07
novel_mir5521	0	18	0.001	1.04	10.0224	Up	1.0588e-07	1.77156e-07
novel_mir2772	0	18	0.001	1.04	10.0224	Up	1.0588e-07	1.77062e-07
novel_mir2213	0	17	0.001	0.98	9.93664	Up	2.55726e-07	4.08904e-07
novel_mir1044	0	17	0.001	0.98	9.93664	Up	2.55726e-07	4.08698e-07
novel_mir4920	0	17	0.001	0.98	9.93664	Up	2.55726e-07	4.08492e-07
novel_mir3971	0	17	0.001	0.98	9.93664	Up	2.55726e-07	4.08287e-07
novel_mir1964	0	17	0.001	0.98	9.93664	Up	2.55726e-07	4.08082e-07
novel_mir4278	0	17	0.001	0.98	9.93664	Up	2.55726e-07	4.07877e-07
mmu-miR-142b	0	17	0.001	0.98	9.93664	Up	2.55726e-07	4.07672e-07
novel_mir2708	0	17	0.001	0.98	9.93664	Up	2.55726e-07	4.07467e-07
novel_mir4689	0	17	0.001	0.98	9.93664	Up	2.55726e-07	4.07263e-07
novel_mir4592	0	17	0.001	0.98	9.93664	Up	2.55726e-07	4.07058e-07
novel_mir3086	0	17	0.001	0.98	9.93664	Up	2.55726e-07	4.06854e-07
novel_mir5280	0	17	0.001	0.98	9.93664	Up	2.55726e-07	4.0665e-07
novel_mir2675	0	17	0.001	0.98	9.93664	Up	2.55726e-07	4.06447e-07
novel_mir2894	0	17	0.001	0.98	9.93664	Up	2.55726e-07	4.06243e-07
novel_mir5672	0	17	0.001	0.98	9.93664	Up	2.55726e-07	4.0604e-07
novel_mir3569	0	17	0.001	0.98	9.93664	Up	2.55726e-07	4.05837e-07
novel_mir3672	0	17	0.001	0.98	9.93664	Up	2.55726e-07	4.05634e-07
novel_mir674	0	17	0.001	0.98	9.93664	Up	2.55726e-07	4.05432e-07
novel_mir1834	0	17	0.001	0.98	9.93664	Up	2.55726e-07	4.05229e-07
novel_mir3246	0	17	0.001	0.98	9.93664	Up	2.55726e-07	4.05027e-07
novel_mir461	0	17	0.001	0.98	9.93664	Up	2.55726e-07	4.04825e-07
novel_mir1127	0	17	0.001	0.98	9.93664	Up	2.55726e-07	4.04623e-07
novel_mir5492	0	16	0.001	0.92	9.84549	Up	6.17636e-07	9.56281e-07
novel_mir4556	0	16	0.001	0.92	9.84549	Up	6.17636e-07	9.55815e-07
novel_mir852	0	16	0.001	0.92	9.84549	Up	6.17636e-07	9.55349e-07
novel_mir3533	0	16	0.001	0.92	9.84549	Up	6.17636e-07	9.54884e-07
novel_mir3233	0	16	0.001	0.92	9.84549	Up	6.17636e-07	9.54419e-07
novel_mir3986	0	16	0.001	0.92	9.84549	Up	6.17636e-07	9.53955e-07
mmu-miR-467a-5p	0	16	0.001	0.92	9.84549	Up	6.17636e-07	9.53491e-07
novel_mir644	0	16	0.001	0.92	9.84549	Up	6.17636e-07	9.53027e-07
novel_mir38	0	16	0.001	0.92	9.84549	Up	6.17636e-07	9.52564e-07
novel_mir3860	0	16	0.001	0.92	9.84549	Up	6.17636e-07	9.52101e-07
novel_mir5681	0	16	0.001	0.92	9.84549	Up	6.17636e-07	9.51639e-07
novel_mir4851	0	16	0.001	0.92	9.84549	Up	6.17636e-07	9.51177e-07
novel_mir972	0	16	0.001	0.92	9.84549	Up	6.17636e-07	9.50716e-07
novel_mir5275	0	16	0.001	0.92	9.84549	Up	6.17636e-07	9.50255e-07
novel_mir1304	0	16	0.001	0.92	9.84549	Up	6.17636e-07	9.49795e-07
novel_mir5328	0	16	0.001	0.92	9.84549	Up	6.17636e-07	9.49335e-07
novel_mir3622	0	16	0.001	0.92	9.84549	Up	6.17636e-07	9.48875e-07
novel_mir880	0	16	0.001	0.92	9.84549	Up	6.17636e-07	9.48416e-07
novel_mir4581	0	16	0.001	0.92	9.84549	Up	6.17636e-07	9.47958e-07
novel_mir4684	0	16	0.001	0.92	9.84549	Up	6.17636e-07	9.475e-07
novel_mir2272	0	16	0.001	0.92	9.84549	Up	6.17636e-07	9.47042e-07
novel_mir5800	0	16	0.001	0.92	9.84549	Up	6.17636e-07	9.46585e-07
novel_mir4966	0	16	0.001	0.92	9.84549	Up	6.17636e-07	9.46128e-07
novel_mir5768	0	15	0.001	0.87	9.76487	Up	1.49173e-06	2.19405e-06
novel_mir5979	0	15	0.001	0.87	9.76487	Up	1.49173e-06	2.19304e-06
novel_mir1076	0	15	0.001	0.87	9.76487	Up	1.49173e-06	2.19202e-06
novel_mir5009	0	15	0.001	0.87	9.76487	Up	1.49173e-06	2.19101e-06
novel_mir1056	0	15	0.001	0.87	9.76487	Up	1.49173e-06	2.18999e-06
novel_mir2728	0	15	0.001	0.87	9.76487	Up	1.49173e-06	2.18898e-06
novel_mir4369	0	15	0.001	0.87	9.76487	Up	1.49173e-06	2.18797e-06
novel_mir4075	0	15	0.001	0.87	9.76487	Up	1.49173e-06	2.18696e-06
novel_mir3832	0	15	0.001	0.87	9.76487	Up	1.49173e-06	2.18595e-06
novel_mir2853	0	15	0.001	0.87	9.76487	Up	1.49173e-06	2.18494e-06
mmu-miR-214-3p	0	15	0.001	0.87	9.76487	Up	1.49173e-06	2.18393e-06
novel_mir368	0	15	0.001	0.87	9.76487	Up	1.49173e-06	2.18292e-06
novel_mir1060	0	15	0.001	0.87	9.76487	Up	1.49173e-06	2.18192e-06
novel_mir2653	0	15	0.001	0.87	9.76487	Up	1.49173e-06	2.18091e-06
novel_mir5557	0	15	0.001	0.87	9.76487	Up	1.49173e-06	2.17991e-06
novel_mir1299	0	15	0.001	0.87	9.76487	Up	1.49173e-06	2.17891e-06
novel_mir5999	0	14	0.001	0.81	9.66178	Up	3.60288e-06	5.08698e-06
novel_mir1238	0	14	0.001	0.81	9.66178	Up	3.60288e-06	5.08472e-06
novel_mir4069	0	14	0.001	0.81	9.66178	Up	3.60288e-06	5.08246e-06
novel_mir4145	0	14	0.001	0.81	9.66178	Up	3.60288e-06	5.0802e-06
novel_mir5862	0	14	0.001	0.81	9.66178	Up	3.60288e-06	5.07795e-06
novel_mir4998	0	14	0.001	0.81	9.66178	Up	3.60288e-06	5.0757e-06
novel_mir2199	0	14	0.001	0.81	9.66178	Up	3.60288e-06	5.07344e-06
novel_mir2010	0	14	0.001	0.81	9.66178	Up	3.60288e-06	5.07119e-06
novel_mir4545	0	14	0.001	0.81	9.66178	Up	3.60288e-06	5.06895e-06
novel_mir3922	0	14	0.001	0.81	9.66178	Up	3.60288e-06	5.0667e-06
novel_mir2979	0	14	0.001	0.81	9.66178	Up	3.60288e-06	5.06446e-06
novel_mir3564	0	14	0.001	0.81	9.66178	Up	3.60288e-06	5.06221e-06
novel_mir2747	0	14	0.001	0.81	9.66178	Up	3.60288e-06	5.05997e-06
novel_mir4246	0	14	0.001	0.81	9.66178	Up	3.60288e-06	5.05774e-06
novel_mir3806	0	14	0.001	0.81	9.66178	Up	3.60288e-06	5.0555e-06
novel_mir5056	0	14	0.001	0.81	9.66178	Up	3.60288e-06	5.05327e-06
novel_mir4974	0	14	0.001	0.81	9.66178	Up	3.60288e-06	5.05103e-06
novel_mir4643	0	14	0.001	0.81	9.66178	Up	3.60288e-06	5.0488e-06
novel_mir6012	0	14	0.001	0.81	9.66178	Up	3.60288e-06	5.04658e-06
novel_mir3593	0	14	0.001	0.81	9.66178	Up	3.60288e-06	5.04435e-06
novel_mir400	0	14	0.001	0.81	9.66178	Up	3.60288e-06	5.04213e-06
novel_mir1458	0	14	0.001	0.81	9.66178	Up	3.60288e-06	5.0399e-06
novel_mir2126	0	14	0.001	0.81	9.66178	Up	3.60288e-06	5.03768e-06
novel_mir4226	0	14	0.001	0.81	9.66178	Up	3.60288e-06	5.03547e-06
novel_mir463	0	14	0.001	0.81	9.66178	Up	3.60288e-06	5.03325e-06
novel_mir440	0	14	0.001	0.81	9.66178	Up	3.60288e-06	5.03103e-06
novel_mir2194	0	13	0.001	0.75	9.55075	Up	8.7018e-06	1.19307e-05
novel_mir1316	0	13	0.001	0.75	9.55075	Up	8.7018e-06	1.19255e-05
novel_mir754	0	13	0.001	0.75	9.55075	Up	8.7018e-06	1.19204e-05
novel_mir5786	0	13	0.001	0.75	9.55075	Up	8.7018e-06	1.19152e-05
novel_mir1800	0	13	0.001	0.75	9.55075	Up	8.7018e-06	1.19101e-05
novel_mir907	0	13	0.001	0.75	9.55075	Up	8.7018e-06	1.1905e-05
novel_mir2686	0	13	0.001	0.75	9.55075	Up	8.7018e-06	1.18998e-05
novel_mir3190	0	13	0.001	0.75	9.55075	Up	8.7018e-06	1.18947e-05
novel_mir4634	0	13	0.001	0.75	9.55075	Up	8.7018e-06	1.18896e-05
novel_mir4544	0	13	0.001	0.75	9.55075	Up	8.7018e-06	1.18845e-05
novel_mir2805	0	13	0.001	0.75	9.55075	Up	8.7018e-06	1.18794e-05
novel_mir5128	0	13	0.001	0.75	9.55075	Up	8.7018e-06	1.18743e-05
novel_mir5412	0	13	0.001	0.75	9.55075	Up	8.7018e-06	1.18692e-05
novel_mir515	0	13	0.001	0.75	9.55075	Up	8.7018e-06	1.18641e-05
novel_mir4639	0	13	0.001	0.75	9.55075	Up	8.7018e-06	1.1859e-05
novel_mir5854	0	13	0.001	0.75	9.55075	Up	8.7018e-06	1.18539e-05
novel_mir6001	0	13	0.001	0.75	9.55075	Up	8.7018e-06	1.18488e-05
novel_mir3166	0	13	0.001	0.75	9.55075	Up	8.7018e-06	1.18437e-05
novel_mir3325	0	13	0.001	0.75	9.55075	Up	8.7018e-06	1.18386e-05
novel_mir403	0	13	0.001	0.75	9.55075	Up	8.7018e-06	1.18336e-05
novel_mir422	0	13	0.001	0.75	9.55075	Up	8.7018e-06	1.18285e-05
novel_mir3841	0	13	0.001	0.75	9.55075	Up	8.7018e-06	1.18234e-05
novel_mir2859	0	13	0.001	0.75	9.55075	Up	8.7018e-06	1.18184e-05
novel_mir1328	0	13	0.001	0.75	9.55075	Up	8.7018e-06	1.18133e-05
novel_mir36	0	13	0.001	0.75	9.55075	Up	8.7018e-06	1.18083e-05
novel_mir3015	0	13	0.001	0.75	9.55075	Up	8.7018e-06	1.18032e-05
novel_mir1122	0	13	0.001	0.75	9.55075	Up	8.7018e-06	1.17982e-05
novel_mir1676	0	13	0.001	0.75	9.55075	Up	8.7018e-06	1.17931e-05
novel_mir1192	0	13	0.001	0.75	9.55075	Up	8.7018e-06	1.17881e-05
novel_mir2804	0	13	0.001	0.75	9.55075	Up	8.7018e-06	1.17831e-05
novel_mir958	0	13	0.001	0.75	9.55075	Up	8.7018e-06	1.1778e-05
novel_mir672	0	13	0.001	0.75	9.55075	Up	8.7018e-06	1.1773e-05
novel_mir1914	0	13	0.001	0.75	9.55075	Up	8.7018e-06	1.1768e-05
novel_mir2792	0	13	0.001	0.75	9.55075	Up	8.7018e-06	1.1763e-05
novel_mir1154	0	13	0.001	0.75	9.55075	Up	8.7018e-06	1.1758e-05
novel_mir3518	0	13	0.001	0.75	9.55075	Up	8.7018e-06	1.1753e-05
novel_mir1569	0	13	0.001	0.75	9.55075	Up	8.7018e-06	1.1748e-05
novel_mir469	0	13	0.001	0.75	9.55075	Up	8.7018e-06	1.1743e-05
novel_mir1491	0	12	0.001	0.69	9.43045	Up	2.10168e-05	2.75082e-05
novel_mir588	0	12	0.001	0.69	9.43045	Up	2.10168e-05	2.74968e-05
novel_mir4015	0	12	0.001	0.69	9.43045	Up	2.10168e-05	2.74855e-05
novel_mir6076	0	12	0.001	0.69	9.43045	Up	2.10168e-05	2.74742e-05
novel_mir3662	0	12	0.001	0.69	9.43045	Up	2.10168e-05	2.74629e-05
novel_mir5072	0	12	0.001	0.69	9.43045	Up	2.10168e-05	2.74516e-05
mmu-miR-874-3p	0	12	0.001	0.69	9.43045	Up	2.10168e-05	2.74403e-05
novel_mir412	0	12	0.001	0.69	9.43045	Up	2.10168e-05	2.7429e-05
novel_mir2140	0	12	0.001	0.69	9.43045	Up	2.10168e-05	2.74177e-05
novel_mir2837	0	12	0.001	0.69	9.43045	Up	2.10168e-05	2.74065e-05
novel_mir2250	0	12	0.001	0.69	9.43045	Up	2.10168e-05	2.73952e-05
novel_mir6134	0	12	0.001	0.69	9.43045	Up	2.10168e-05	2.7384e-05
mmu-miR-802-3p	0	12	0.001	0.69	9.43045	Up	2.10168e-05	2.73727e-05
novel_mir2103	0	12	0.001	0.69	9.43045	Up	2.10168e-05	2.73615e-05
novel_mir5402	0	12	0.001	0.69	9.43045	Up	2.10168e-05	2.73503e-05
novel_mir3185	0	12	0.001	0.69	9.43045	Up	2.10168e-05	2.73391e-05
novel_mir1092	0	12	0.001	0.69	9.43045	Up	2.10168e-05	2.73279e-05
novel_mir312	0	12	0.001	0.69	9.43045	Up	2.10168e-05	2.73167e-05
novel_mir5994	0	12	0.001	0.69	9.43045	Up	2.10168e-05	2.73055e-05
novel_mir2771	0	12	0.001	0.69	9.43045	Up	2.10168e-05	2.72943e-05
mmu-miR-32-5p	0	12	0.001	0.69	9.43045	Up	2.10168e-05	2.72832e-05
novel_mir3722	0	12	0.001	0.69	9.43045	Up	2.10168e-05	2.7272e-05
novel_mir4705	0	12	0.001	0.69	9.43045	Up	2.10168e-05	2.72609e-05
novel_mir162	0	12	0.001	0.69	9.43045	Up	2.10168e-05	2.72497e-05
novel_mir4956	0	12	0.001	0.69	9.43045	Up	2.10168e-05	2.72386e-05
novel_mir4777	0	11	0.001	0.63	9.29921	Up	5.07606e-05	6.40104e-05
novel_mir5582	0	11	0.001	0.63	9.29921	Up	5.07606e-05	6.3985e-05
novel_mir1923	0	11	0.001	0.63	9.29921	Up	5.07606e-05	6.39596e-05
novel_mir5355	0	11	0.001	0.63	9.29921	Up	5.07606e-05	6.39342e-05
novel_mir5272	0	11	0.001	0.63	9.29921	Up	5.07606e-05	6.39088e-05
novel_mir383	0	11	0.001	0.63	9.29921	Up	5.07606e-05	6.38835e-05
novel_mir4987	0	11	0.001	0.63	9.29921	Up	5.07606e-05	6.38582e-05
novel_mir2554	0	11	0.001	0.63	9.29921	Up	5.07606e-05	6.38329e-05
novel_mir706	0	11	0.001	0.63	9.29921	Up	5.07606e-05	6.38076e-05
novel_mir1754	0	11	0.001	0.63	9.29921	Up	5.07606e-05	6.37823e-05
novel_mir2789	0	11	0.001	0.63	9.29921	Up	5.07606e-05	6.37571e-05
novel_mir1905	0	11	0.001	0.63	9.29921	Up	5.07606e-05	6.37319e-05
novel_mir6020	0	11	0.001	0.63	9.29921	Up	5.07606e-05	6.37067e-05
novel_mir3912	0	11	0.001	0.63	9.29921	Up	5.07606e-05	6.36815e-05
novel_mir1780	0	11	0.001	0.63	9.29921	Up	5.07606e-05	6.36563e-05
novel_mir397	0	11	0.001	0.63	9.29921	Up	5.07606e-05	6.36312e-05
novel_mir4329	0	11	0.001	0.63	9.29921	Up	5.07606e-05	6.36061e-05
novel_mir4013	0	11	0.001	0.63	9.29921	Up	5.07606e-05	6.3581e-05
novel_mir324	0	11	0.001	0.63	9.29921	Up	5.07606e-05	6.35559e-05
novel_mir4318	0	11	0.001	0.63	9.29921	Up	5.07606e-05	6.35308e-05
novel_mir2277	0	11	0.001	0.63	9.29921	Up	5.07606e-05	6.35058e-05
novel_mir4485	0	11	0.001	0.63	9.29921	Up	5.07606e-05	6.34808e-05
novel_mir3973	0	11	0.001	0.63	9.29921	Up	5.07606e-05	6.34557e-05
novel_mir2716	0	11	0.001	0.63	9.29921	Up	5.07606e-05	6.34308e-05
novel_mir3285	0	11	0.001	0.63	9.29921	Up	5.07606e-05	6.34058e-05
mmu-miR-103-3p	0	10	0.001	0.58	9.17991	Up	0.000122598	0.000150825
novel_mir5968	0	10	0.001	0.58	9.17991	Up	0.000122598	0.000150766
novel_mir5640	0	10	0.001	0.58	9.17991	Up	0.000122598	0.000150708
novel_mir1932	0	10	0.001	0.58	9.17991	Up	0.000122598	0.000150649
novel_mir2931	0	10	0.001	0.58	9.17991	Up	0.000122598	0.000150591
novel_mir1782	0	10	0.001	0.58	9.17991	Up	0.000122598	0.000150533
novel_mir4294	0	10	0.001	0.58	9.17991	Up	0.000122598	0.000150475
novel_mir2343	0	10	0.001	0.58	9.17991	Up	0.000122598	0.000150416
novel_mir1512	0	10	0.001	0.58	9.17991	Up	0.000122598	0.000150358
novel_mir5544	0	10	0.001	0.58	9.17991	Up	0.000122598	0.0001503
novel_mir1358	0	10	0.001	0.58	9.17991	Up	0.000122598	0.000150242
novel_mir420	0	10	0.001	0.58	9.17991	Up	0.000122598	0.000150184
novel_mir240	0	10	0.001	0.58	9.17991	Up	0.000122598	0.000150126
novel_mir4719	0	10	0.001	0.58	9.17991	Up	0.000122598	0.000150068
novel_mir75	0	10	0.001	0.58	9.17991	Up	0.000122598	0.000150011
novel_mir1549	0	10	0.001	0.58	9.17991	Up	0.000122598	0.000149953
novel_mir681	0	10	0.001	0.58	9.17991	Up	0.000122598	0.000149895
novel_mir2470	0	10	0.001	0.58	9.17991	Up	0.000122598	0.000149837
novel_mir3077	0	10	0.001	0.58	9.17991	Up	0.000122598	0.00014978
novel_mir2235	0	10	0.001	0.58	9.17991	Up	0.000122598	0.000149722
novel_mir3099	0	10	0.001	0.58	9.17991	Up	0.000122598	0.000149664
novel_mir1156	0	10	0.001	0.58	9.17991	Up	0.000122598	0.000149607
mmu-miR-540-3p	0	9	0.001	0.52	9.02237	Up	0.000296104	0.000353056
mmu-miR-1298-5p	0	8	0.001	0.46	8.84549	Up	0.000715158	0.00083514
mmu-miR-200b-5p	0	8	0.001	0.46	8.84549	Up	0.000715158	0.000834833
mmu-miR-200a-5p	0	8	0.001	0.46	8.84549	Up	0.000715158	0.000834526
mmu-miR-101a-3p	0	8	0.001	0.46	8.84549	Up	0.000715158	0.00083422
mmu-miR-6538	3	292	0.12	16.84	7.13271	Up	1.07694e-106	1.23848e-105
mmu-miR-382-5p	2	150	0.08	8.65	6.75656	Up	1.20102e-54	8.7033e-54
mmu-miR-181b-5p	1	69	0.04	3.98	6.63662	Up	1.31024e-25	5.53755e-25
mmu-miR-30c-5p	2	113	0.08	6.52	6.34873	Up	1.0208e-40	6.09027e-40
mmu-miR-23b-3p	6	338	0.24	19.49	6.34356	Up	2.76242e-119	3.46558e-118
mmu-miR-151-3p	180	10239	7.33	590.49	6.33196	Up	0	0
novel_mir1670	51	2725	2.08	157.15	6.23941	Up	0	0
novel_mir1	2470	128368	100.65	7403.03	6.2007	Up	0	0
novel_mir3580	17	770	0.69	44.41	6.00814	Up	5.18636e-265	1.15115e-263
novel_mir2284	38	1643	1.55	94.75	5.93379	Up	0	0
novel_mir1596	23	890	0.94	51.33	5.771	Up	2.0983e-301	5.08397e-300
novel_mir6029	26	944	1.06	54.44	5.68253	Up	0	0
novel_mir1814	23	829	0.94	47.81	5.66851	Up	9.64402e-279	2.20217e-277
novel_mir764	26	861	1.06	49.65	5.54966	Up	1.14079e-286	2.66241e-285
novel_mir5799	90	2939	3.67	169.49	5.52928	Up	0	0
novel_mir2765	18	553	0.73	31.89	5.44906	Up	4.81988e-183	8.31429e-182
mmu-miR-6948-3p	1	30	0.04	1.73	5.43463	Up	5.1501e-11	1.17263e-10
novel_mir44	134	3282	5.46	189.27	5.1154	Up	0	0
novel_mir3621	53	1271	2.16	73.3	5.08471	Up	0	0
novel_mir358	26	608	1.06	35.06	5.04769	Up	1.25382e-193	2.27407e-192
mmu-miR-500-3p	32	719	1.3	41.46	4.99514	Up	3.05262e-227	6.05563e-226
novel_mir5391	22	486	0.9	28.03	4.9609	Up	1.01018e-153	1.47079e-152
novel_mir4040	12	259	0.49	14.94	4.93025	Up	2.44396e-82	2.37221e-81
mmu-miR-96-5p	1	20	0.04	1.15	4.84549	Up	2.415e-07	3.86351e-07
novel_mir1744	20	351	0.81	20.24	4.64314	Up	4.7162e-107	5.44335e-106
novel_mir3754	39	686	1.59	39.56	4.63694	Up	9.74228e-208	1.81894e-206
novel_mir2210	11	194	0.45	11.19	4.63614	Up	6.63068e-60	5.17095e-59
novel_mir596	61	1062	2.49	61.25	4.62049	Up	0	0
mmu-miR-125a-5p	2	34	0.08	1.96	4.61471	Up	1.87812e-11	4.41895e-11
novel_mir442	37	637	1.51	36.74	4.60473	Up	3.24878e-192	5.85888e-191
mmu-miR-1a-3p	116	1976	4.73	113.96	4.59054	Up	0	0
novel_mir1150	320	5349	13.04	308.48	4.56416	Up	0	0
mmu-miR-24-3p	13518	222021	550.86	12804	4.53877	Up	0	0
mmu-miR-341-3p	8	128	0.33	7.38	4.48308	Up	2.87952e-39	1.64381e-38
novel_mir5197	14	220	0.57	12.69	4.47659	Up	3.3121e-66	2.80336e-65
mmu-miR-467c-5p	1	15	0.04	0.87	4.44294	Up	1.54773e-05	2.05888e-05
mmu-miR-182-5p	1	15	0.04	0.87	4.44294	Up	1.54773e-05	2.05802e-05
mmu-miR-34c-5p	1	15	0.04	0.87	4.44294	Up	1.54773e-05	2.05716e-05
novel_mir720	20	300	0.81	17.3	4.41671	Up	7.76514e-89	7.8743e-88
mmu-miR-126a-3p	522	7322	21.27	422.26	4.31124	Up	0	0
novel_mir5422	23	309	0.94	17.82	4.24469	Up	3.4209e-89	3.4913e-88
novel_mir4092	44	552	1.79	31.83	4.15236	Up	2.23302e-155	3.32751e-154
novel_mir5404	16	198	0.65	11.42	4.13498	Up	1.42323e-56	1.06541e-55
novel_mir1903	31	368	1.26	21.22	4.07393	Up	1.12274e-102	1.26368e-101
mmu-miR-200c-3p	28	327	1.14	18.86	4.04822	Up	5.0205e-91	5.2418e-90
novel_mir5257	28	324	1.14	18.69	4.03516	Up	5.5314e-90	5.70022e-89
mmu-miR-411-5p	42	484	1.71	27.91	4.02871	Up	1.92003e-133	2.52871e-132
novel_mir1750	18	206	0.73	11.88	4.02449	Up	1.27988e-57	9.69534e-57
mmu-miR-125b-5p	52	597	2.12	34.43	4.02153	Up	5.04526e-164	7.8885e-163
novel_mir174	129	1452	5.26	83.74	3.99278	Up	0	0
novel_mir22	13	136	0.53	7.84	3.88679	Up	1.28897e-37	7.11513e-37
novel_mir227	23	225	0.94	12.98	3.78749	Up	4.90212e-60	3.83235e-59
novel_mir105	122	1166	4.97	67.24	3.758	Up	9.74892e-302	2.38024e-300
novel_mir4441	42	394	1.71	22.72	3.73189	Up	1.53115e-102	1.71727e-101
novel_mir1282	4389	39644	178.85	2286.28	3.67618	Up	0	0
novel_mir3583	43	368	1.75	21.22	3.6	Up	5.22152e-93	5.58017e-92
novel_mir4322	37	309	1.51	17.82	3.56088	Up	1.05208e-77	9.9681e-77
mmu-miR-199a-3p,mmu-miR-199b-3p	26	214	1.06	12.34	3.54121	Up	4.86722e-54	3.51104e-53
novel_mir4214	17	136	0.69	7.84	3.50619	Up	1.4707e-34	7.59026e-34
novel_mir3584	33	264	1.34	15.22	3.50566	Up	1.28149e-65	1.08177e-64
novel_mir282	61	483	2.49	27.85	3.48346	Up	3.37758e-118	4.17138e-117
mmu-miR-127-3p	393	3039	16.01	175.26	3.45245	Up	0	0
novel_mir3671	33	253	1.34	14.59	3.44467	Up	5.63816e-62	4.54201e-61
novel_mir3605	52	396	2.12	22.84	3.42943	Up	8.18672e-96	8.89885e-95
novel_mir1208	19	139	0.77	8.02	3.38067	Up	3.75514e-34	1.92861e-33
novel_mir5296	48	330	1.96	19.03	3.27935	Up	5.97884e-77	5.63111e-76
novel_mir3180	20	132	0.81	7.61	3.2319	Up	3.2874e-31	1.58094e-30
novel_mir329	23	153	0.94	8.82	3.23005	Up	4.74452e-36	2.53948e-35
mmu-miR-196b-5p	989	6456	40.3	372.32	3.20769	Up	0	0
mmu-miR-1198-5p	13722	88237	559.17	5088.66	3.18593	Up	0	0
mmu-miR-143-3p	988	6266	40.26	361.36	3.16602	Up	0	0
novel_mir2147	29	181	1.18	10.44	3.14526	Up	3.18898e-41	1.91701e-40
mmu-miR-206-3p	792	4885	32.27	281.72	3.126	Up	0	0
novel_mir432	101	615	4.12	35.47	3.10588	Up	1.68629e-134	2.23945e-133
novel_mir1369	29	176	1.18	10.15	3.10462	Up	1.24618e-39	7.16555e-39
novel_mir573	19	113	0.77	6.52	3.08194	Up	9.30166e-26	3.96288e-25
mmu-miR-297a-5p	11	65	0.45	3.75	3.05889	Up	2.2387e-15	6.68451e-15
novel_mir25	10	59	0.41	3.4	3.05184	Up	4.50098e-14	1.22733e-13
novel_mir984	45	252	1.83	14.53	2.98912	Up	5.83242e-54	4.19776e-53
mmu-miR-378a-3p	1066	5879	43.44	339.04	2.96436	Up	0	0
mmu-miR-503-3p	105	570	4.28	32.87	2.94109	Up	5.3034e-118	6.52442e-117
novel_mir5503	12	65	0.49	3.75	2.93604	Up	8.62768e-15	2.47821e-14
novel_mir5119	84	441	3.42	25.43	2.89446	Up	3.9364e-90	4.08305e-89
novel_mir4216	29	147	1.18	8.48	2.84528	Up	1.39772e-30	6.60171e-30
mmu-let-7c-5p	5498	27891	224.04	1608.48	2.84387	Up	0	0
novel_mir4596	44	219	1.79	12.63	2.81882	Up	2.38962e-44	1.5139e-43
novel_mir5654	26	126	1.06	7.27	2.77789	Up	8.2118e-26	3.50326e-25
novel_mir3030	19	91	0.77	5.25	2.76939	Up	6.18974e-19	2.13314e-18
mmu-miR-877-5p	33	157	1.34	9.05	2.75568	Up	1.82785e-31	8.817e-31
mmu-miR-872-3p	189	876	7.7	50.52	2.71392	Up	3.0001e-165	4.76116e-164
novel_mir2722	103	469	4.2	27.05	2.68717	Up	2.11436e-88	2.13725e-87
novel_mir1657	15	68	0.61	3.92	2.68397	Up	4.32246e-14	1.18068e-13
novel_mir550	15	66	0.61	3.81	2.64291	Up	1.70551e-13	4.55281e-13
novel_mir2109	33	144	1.34	8.3	2.63088	Up	1.37141e-27	6.07942e-27
novel_mir3498	1773	7702	72.25	444.18	2.62007	Up	0	0
novel_mir110	34	145	1.39	8.36	2.58842	Up	2.16912e-27	9.5622e-27
novel_mir3542	12	51	0.49	2.94	2.58496	Up	1.55684e-10	3.42441e-10
novel_mir3	251	1063	10.23	61.3	2.58308	Up	3.14302e-189	5.57315e-188
novel_mir1792	151	631	6.15	36.39	2.56488	Up	3.92446e-112	4.71827e-111
mmu-miR-101b-3p	55	228	2.24	13.15	2.55349	Up	2.0567e-41	1.24579e-40
novel_mir1850	26	107	1.06	6.17	2.54121	Up	3.60742e-20	1.30409e-19
mmu-miR-122-5p	2134	8709	86.96	502.25	2.52998	Up	0	0
novel_mir842	16	64	0.65	3.69	2.50511	Up	2.00042e-12	5.03516e-12
novel_mir1968	14	56	0.57	3.23	2.5025	Up	4.82778e-11	1.10003e-10
novel_mir1559	17	67	0.69	3.86	2.48393	Up	7.93622e-13	2.04627e-12
novel_mir2513	35	138	1.43	7.96	2.47675	Up	6.91174e-25	2.87145e-24
novel_mir4026	20	78	0.81	4.5	2.47393	Up	1.31867e-14	3.77748e-14
novel_mir2029	17	66	0.69	3.81	2.46512	Up	1.53801e-12	3.91158e-12
novel_mir4550	23	90	0.94	5.19	2.465	Up	1.14318e-16	3.63938e-16
novel_mir3141	42	162	1.71	9.34	2.44943	Up	1.58482e-28	7.1963e-28
novel_mir1646	60	231	2.44	13.32	2.44864	Up	6.08374e-40	3.55613e-39
mmu-miR-30a-5p	228	874	9.29	50.4	2.43967	Up	8.73064e-146	1.2154e-144
mmu-miR-126a-5p	78	297	3.18	17.13	2.42943	Up	1.72543e-50	1.20363e-49
novel_mir4733	23	86	0.94	4.96	2.39961	Up	1.57294e-15	4.72776e-15
novel_mir5588	34	127	1.39	7.32	2.39676	Up	3.25094e-22	1.24319e-21
mmu-miR-379-5p	68	252	2.77	14.53	2.39108	Up	2.7669e-42	1.69867e-41
novel_mir6098	112	407	4.56	23.47	2.36371	Up	2.73462e-66	2.32077e-65
novel_mir4006	23	83	0.94	4.79	2.34929	Up	1.09688e-14	3.14497e-14
novel_mir288	36	129	1.47	7.44	2.33949	Up	6.6952e-22	2.54803e-21
mmu-let-7g-5p	10012	35785	407.99	2063.73	2.33865	Up	0	0
novel_mir1207	24	85	0.98	4.9	2.32193	Up	8.16988e-15	2.35097e-14
mmu-miR-21a-5p	5831	20585	237.61	1187.14	2.32082	Up	0	0
mmu-miR-187-3p	33	115	1.34	6.63	2.30678	Up	2.65784e-19	9.32153e-19
novel_mir238	28	97	1.14	5.59	2.29381	Up	1.92166e-16	6.06298e-16
novel_mir609	14	48	0.57	2.77	2.28085	Up	8.96306e-09	1.65592e-08
novel_mir1589	101	347	4.12	20.01	2.28	Up	1.95619e-54	1.41434e-53
mmu-miR-872-5p	801	2720	32.64	156.86	2.26476	Up	0	0
novel_mir4951	25	85	1.02	4.9	2.26421	Up	2.14674e-14	6.06206e-14
novel_mir1597	26	88	1.06	5.07	2.25792	Up	8.3739e-15	2.4075e-14
mmu-miR-8116	54	182	2.2	10.5	2.25481	Up	6.49274e-29	2.96945e-28
mmu-miR-484	2157	7259	87.9	418.63	2.25174	Up	0	0
novel_mir5646	28	93	1.14	5.36	2.2332	Up	2.38424e-15	7.0725e-15
mmu-miR-486a-5p,mmu-miR-486b-5p	10330	34232	420.95	1974.17	2.22953	Up	0	0
novel_mir2466	10	33	0.41	1.9	2.2123	Up	2.80892e-06	4.0287e-06
novel_mir1598	11	36	0.45	2.08	2.20859	Up	1.0678e-06	1.60169e-06
mmu-miR-652-3p	2848	9279	116.06	535.12	2.20499	Up	0	0
mmu-miR-141-3p	98	317	3.99	18.28	2.19581	Up	1.48328e-47	9.91141e-47
mmu-miR-181a-5p	487	1563	19.85	90.14	2.18303	Up	9.07976e-226	1.77896e-224
novel_mir1783	30	96	1.22	5.54	2.183	Up	2.32662e-15	6.90804e-15
novel_mir1411	11	35	0.45	2.02	2.16636	Up	2.00088e-06	2.87887e-06
novel_mir1708	43	134	1.75	7.73	2.14311	Up	2.0539e-20	7.49319e-20
mmu-miR-429-3p	638	1981	26	114.24	2.13548	Up	1.4537e-277	3.27238e-276
novel_mir3059	12	37	0.49	2.13	2.12	Up	1.41394e-06	2.08157e-06
novel_mir1212	82	250	3.34	14.42	2.11015	Up	4.83602e-36	2.5841e-35
mmu-miR-24-2-5p	106	323	4.32	18.63	2.10852	Up	4.69428e-46	3.06577e-45
novel_mir6021	14	42	0.57	2.42	2.08597	Up	3.78132e-07	5.8689e-07
mmu-miR-29a-3p	140	418	5.7	24.11	2.0806	Up	4.86382e-58	3.71994e-57
mmu-miR-30d-5p	2957	8805	120.5	507.79	2.0752	Up	0	0
novel_mir4451	83	247	3.38	14.24	2.07485	Up	6.84738e-35	3.55705e-34
mmu-miR-1843a-5p	22	65	0.9	3.75	2.05889	Up	3.25796e-10	7.05854e-10
mmu-miR-322-5p	107	312	4.36	17.99	2.0448	Up	7.60276e-43	4.70393e-42
mmu-miR-142a-5p	118	343	4.81	19.78	2.03993	Up	8.44286e-47	5.5945e-46
novel_mir1025	82	238	3.34	13.73	2.03941	Up	6.08542e-33	3.04175e-32
mmu-miR-499-5p	152	439	6.19	25.32	2.03227	Up	4.62684e-59	3.57314e-58
novel_mir3848	1348	3882	54.93	223.88	2.02706	Up	0	0
novel_mir3999	70	201	2.85	11.59	2.02385	Up	8.35466e-28	3.72439e-27
mmu-let-7f-5p	4089	11708	166.63	675.2	2.01867	Up	0	0
mmu-miR-361-5p	27	77	1.1	4.44	2.01306	Up	1.67372e-11	3.94094e-11
novel_mir2403	16	45	0.65	2.6	2	Up	3.33984e-07	5.27396e-07
novel_mir212	12	34	0.49	1.96	2	Up	8.76168e-06	1.18188e-05
novel_mir1982	18	50	0.73	2.88	1.9801	Up	8.84712e-08	1.49525e-07
mmu-miR-139-3p	24	67	0.98	3.86	1.97775	Up	5.20442e-10	1.11238e-09
novel_mir5223	36	99	1.47	5.71	1.95767	Up	6.24474e-14	1.70136e-13
novel_mir5145	42	115	1.71	6.63	1.95501	Up	6.97388e-16	2.13248e-15
novel_mir2012	11	30	0.45	1.73	1.94278	Up	4.20202e-05	5.35846e-05
mmu-let-7b-5p	3854	10449	157.05	602.6	1.93998	Up	0	0
mmu-miR-22-3p	6905	18303	281.38	1055.54	1.90739	Up	0	0
novel_mir2322	55	145	2.24	8.36	1.9	Up	6.02836e-19	2.07978e-18
novel_mir5	29	76	1.18	4.38	1.89214	Up	1.45264e-10	3.19742e-10
novel_mir4254	33	86	1.34	4.96	1.88811	Up	1.0415e-11	2.50055e-11
mmu-miR-150-5p	2681	7006	109.25	404.04	1.88686	Up	0	0
novel_mir1652	39	102	1.59	5.88	1.88679	Up	1.14879e-13	3.0953e-13
mmu-let-7a-5p	4701	12269	191.56	707.56	1.88506	Up	0	0
mmu-miR-30e-5p	30	78	1.22	4.5	1.88304	Up	9.97366e-11	2.22932e-10
mmu-miR-375-3p	4474	11632	182.31	670.82	1.87953	Up	0	0
novel_mir1223	14	36	0.57	2.08	1.86755	Up	1.31687e-05	1.75325e-05
novel_mir2490	48	121	1.96	6.98	1.83237	Up	2.23084e-15	6.66731e-15
novel_mir4744	41	103	1.67	5.94	1.83061	Up	2.90122e-13	7.62291e-13
novel_mir3387	10	25	0.41	1.44	1.81237	Up	0.000357604	0.000425904
novel_mir1308	25	62	1.02	3.58	1.81139	Up	1.9445e-08	3.50473e-08
novel_mir3680	18	44	0.73	2.54	1.79886	Up	2.74652e-06	3.94098e-06
mmu-miR-151-5p	260	635	10.59	36.62	1.78993	Up	2.37918e-71	2.12121e-70
novel_mir3012	14	34	0.57	1.96	1.78182	Up	4.0855e-05	5.21197e-05
novel_mir1566	56	133	2.28	7.67	1.75019	Up	9.30206e-16	2.83347e-15
mmu-miR-223-3p	611	1446	24.9	83.39	1.74373	Up	2.32756e-154	3.43613e-153
novel_mir4407	41	97	1.67	5.59	1.743	Up	7.68802e-12	1.86273e-11
novel_mir23	43	101	1.75	5.82	1.73366	Up	3.53708e-12	8.76401e-12
novel_mir5698	38	89	1.55	5.13	1.72669	Up	7.22184e-11	1.62799e-10
mmu-miR-296-5p	146	337	5.95	19.43	1.70732	Up	2.62316e-36	1.40878e-35
mmu-let-7i-5p	10887	25081	443.64	1446.43	1.70504	Up	0	0
novel_mir3689	28	63	1.14	3.63	1.67094	Up	8.97316e-08	1.51574e-07
novel_mir1634	60	134	2.44	7.73	1.66359	Up	7.89848e-15	2.28322e-14
novel_mir4982	30	67	1.22	3.86	1.66172	Up	4.05322e-08	7.1631e-08
novel_mir5780	38	85	1.55	4.9	1.66051	Up	5.99614e-10	1.27303e-09
mmu-miR-145a-5p	136	303	5.54	17.47	1.65692	Up	1.79298e-31	8.66197e-31
mmu-miR-30a-3p	33	73	1.34	4.21	1.65159	Up	1.23126e-08	2.27078e-08
novel_mir1500	42	93	1.71	5.36	1.64824	Up	1.23733e-10	2.72538e-10
mmu-miR-26a-5p	2359	5180	96.13	298.73	1.63578	Up	0	0
mmu-miR-34a-5p	690	1497	28.12	86.33	1.61827	Up	1.56177e-143	2.16465e-142
novel_mir4993	25	54	1.02	3.11	1.60835	Up	1.42959e-06	2.10362e-06
novel_mir2874	42	90	1.71	5.19	1.60174	Up	5.78044e-10	1.22805e-09
novel_mir1679	43	92	1.75	5.31	1.60136	Up	3.88704e-10	8.31366e-10
novel_mir2960	15	32	0.61	1.85	1.60064	Up	0.000237196	0.00028367
mmu-miR-148b-3p	43	91	1.75	5.25	1.58496	Up	6.45134e-10	1.34361e-09
novel_mir43	122	254	4.97	14.65	1.55958	Up	1.6706e-24	6.85077e-24
novel_mir1953	23	48	0.94	2.77	1.55915	Up	8.96354e-06	1.20859e-05
novel_mir825	15	31	0.61	1.79	1.55308	Up	0.000398722	0.000470812
mmu-miR-15b-5p	123	252	5.01	14.53	1.53615	Up	8.0408e-24	3.23877e-23
novel_mir3752	41	84	1.67	4.84	1.53516	Up	6.4229e-09	1.22001e-08
mmu-miR-487b-3p	26	53	1.06	3.06	1.52947	Up	4.39194e-06	6.13017e-06
novel_mir1821	49	100	2	5.77	1.52857	Up	2.64898e-10	5.74308e-10
novel_mir334	42	85	1.71	4.9	1.51879	Up	7.05722e-09	1.33889e-08
novel_mir532	48	96	1.96	5.54	1.49903	Up	1.05033e-09	2.14666e-09
novel_mir637	42	83	1.71	4.79	1.48603	Up	1.87276e-08	3.37735e-08
novel_mir3951	33	65	1.34	3.75	1.48466	Up	6.94336e-07	1.042e-06
mmu-miR-339-5p	31	61	1.26	3.52	1.48215	Up	1.55615e-06	2.27195e-06
novel_mir1862	30	59	1.22	3.4	1.47865	Up	2.33128e-06	3.3497e-06
novel_mir2436	20	39	0.81	2.25	1.47393	Up	0.000137509	0.000166268
mmu-miR-183-5p	79	155	3.22	8.94	1.47321	Up	2.0465e-14	5.78414e-14
mmu-miR-425-3p	661	1295	26.94	74.68	1.47097	Up	3.76352e-108	4.35964e-107
novel_mir4963	25	48	1.02	2.77	1.44132	Up	2.88434e-05	3.68703e-05
mmu-miR-365-3p	23	44	0.94	2.54	1.4341	Up	6.53096e-05	8.1451e-05
novel_mir78	78	147	3.18	8.48	1.41504	Up	5.09736e-13	1.31966e-12
novel_mir3861	34	64	1.39	3.69	1.40854	Up	1.95256e-06	2.81063e-06
mmu-miR-185-5p	374	701	15.24	40.43	1.40756	Up	1.275e-55	9.47737e-55
mmu-miR-326-3p	531	984	21.64	56.75	1.39092	Up	5.55304e-76	5.18393e-75
mmu-miR-203-3p	46	85	1.87	4.9	1.38974	Up	6.46618e-08	1.11059e-07
novel_mir1425	21	39	0.86	2.25	1.38752	Up	0.000239878	0.000286769
novel_mir332	26	48	1.06	2.77	1.38582	Up	4.97684e-05	6.27841e-05
mmu-miR-7a-5p	383	707	15.61	40.77	1.38504	Up	8.89922e-55	6.46364e-54
novel_mir802	419	773	17.07	44.58	1.38493	Up	1.14532e-59	8.90995e-59
novel_mir2135	27	49	1.1	2.83	1.3633	Up	5.28732e-05	6.60187e-05
novel_mir385	20	36	0.81	2.08	1.36059	Up	0.000580818	0.000684051
novel_mir2287	25	45	1.02	2.6	1.34994	Up	0.000119259	0.000146773
novel_mir454	29	52	1.18	3	1.34618	Up	3.72976e-05	4.76389e-05
novel_mir646	159	285	6.48	16.44	1.34314	Up	4.50076e-22	1.717e-21
mmu-miR-33-5p	34	61	1.39	3.52	1.34049	Up	7.85848e-06	1.07838e-05
mmu-miR-486b-3p	1929	3428	78.61	197.69	1.33046	Up	1.35107e-242	2.83994e-241
mmu-miR-99a-5p	5670	10073	231.05	580.91	1.33011	Up	0	0
novel_mir4099	66	117	2.69	6.75	1.32728	Up	8.80526e-10	1.82905e-09
novel_mir6115	57	101	2.32	5.82	1.32689	Up	1.25117e-08	2.30616e-08
novel_mir5597	29	51	1.18	2.94	1.31703	Up	5.88384e-05	7.34381e-05
novel_mir1848	23	40	0.94	2.31	1.29716	Up	0.000426458	0.000503189
novel_mir266	122	211	4.97	12.17	1.29201	Up	7.6711e-16	2.34116e-15
mmu-let-7d-5p	1527	2627	62.22	151.5	1.28387	Up	2.65288e-176	4.36282e-175
novel_mir2009	60	102	2.44	5.88	1.26894	Up	3.44268e-08	6.0875e-08
novel_mir4050	96	163	3.91	9.4	1.26549	Up	3.2202e-12	7.98509e-12
mmu-miR-574-3p	129	219	5.26	12.63	1.26372	Up	6.70038e-16	2.05082e-15
novel_mir1947	39	66	1.59	3.81	1.26076	Up	9.90558e-06	1.32102e-05
mmu-miR-181d-5p	276	465	11.25	26.82	1.25338	Up	1.47849e-31	7.16446e-31
novel_mir1822	45	75	1.83	4.33	1.24252	Up	3.38644e-06	4.78352e-06
novel_mir3637	347	577	14.14	33.28	1.23487	Up	7.32266e-38	4.06331e-37
mmu-miR-204-5p	799	1321	32.56	76.18	1.22631	Up	1.7379e-83	1.72378e-82
novel_mir84	95	157	3.87	9.05	1.22558	Up	2.5548e-11	5.9537e-11
mmu-miR-26b-5p	744	1224	30.32	70.59	1.21919	Up	8.6018e-77	8.07755e-76
mmu-miR-223-5p	128	207	5.22	11.94	1.19368	Up	6.26676e-14	1.70589e-13
novel_mir5117	34	55	1.39	3.17	1.1894	Up	0.00010993	0.000135449
novel_mir2422	30	48	1.22	2.77	1.183	Up	0.000350672	0.000417805
novel_mir323	40	64	1.63	3.69	1.17875	Up	3.66176e-05	4.67892e-05
novel_mir2212	36	57	1.47	3.29	1.16227	Up	0.000115541	0.000142252
mmu-miR-100-5p	882	1374	35.94	79.24	1.14064	Up	2.19472e-77	2.07323e-76
mmu-miR-200a-3p	85	132	3.46	7.61	1.13712	Up	8.7719e-09	1.64551e-08
novel_mir2065	1284	1984	52.32	114.42	1.1289	Up	4.58448e-109	5.36942e-108
mmu-miR-148a-3p	232	358	9.45	20.65	1.12776	Up	4.8809e-21	1.79305e-20
mmu-miR-92b-3p	731	1125	29.79	64.88	1.12295	Up	3.73696e-62	3.02579e-61
novel_mir1408	30	46	1.22	2.65	1.11911	Up	0.000802462	0.000935027
novel_mir3739	51	78	2.08	4.5	1.11334	Up	1.34494e-05	1.78987e-05
novel_mir752	127	194	5.18	11.19	1.11119	Up	7.12546e-12	1.72775e-11
mmu-miR-98-5p	333	503	13.57	29.01	1.09613	Up	1.07871e-27	4.80201e-27
novel_mir161	301	454	12.27	26.18	1.09333	Up	4.41388e-25	1.84824e-24
mmu-miR-139-5p	2123	3190	86.51	183.97	1.08853	Up	3.4159e-164	5.36736e-163
mmu-miR-219a-2-3p	37	54	1.51	3.11	1.04237	Up	0.000578622	0.000681717
mmu-miR-1839-5p	544	786	22.17	45.33	1.03186	Up	1.78924e-38	1.00514e-37
novel_mir1946	137	197	5.58	11.36	1.02563	Up	1.05707e-10	2.35946e-10
mmu-miR-215-3p	97	139	3.95	8.02	1.02175	Up	6.5299e-08	1.12092e-07
mmu-miR-486a-3p	334	479	13.61	27.62	1.02105	Up	1.03451e-23	4.13544e-23
novel_mir2602	2968	0	120.95	0.001	-16.8841	Down	0	0
novel_mir3677	1802	0	73.43	0.001	-16.1641	Down	0	0
mmu-miR-532-5p	1664	0	67.81	0.001	-16.0492	Down	0	0
novel_mir3523	1451	0	59.13	0.001	-15.8516	Down	0	0
novel_mir4164	1323	0	53.91	0.001	-15.7183	Down	8e-308	1.98375e-306
novel_mir2299	1240	0	50.53	0.001	-15.6249	Down	1.68279e-288	4.01593e-287
novel_mir4093	1157	0	47.15	0.001	-15.525	Down	3.11124e-269	6.95428e-268
novel_mir1039	1110	0	45.23	0.001	-15.465	Down	2.52992e-258	5.46256e-257
novel_mir3779	1089	0	44.38	0.001	-15.4376	Down	1.89611e-253	4.06639e-252
novel_mir128	974	0	39.69	0.001	-15.2765	Down	9.39654e-227	1.85246e-225
novel_mir301	855	0	34.84	0.001	-15.0885	Down	3.95002e-199	7.33179e-198
novel_mir4067	772	0	31.46	0.001	-14.9412	Down	7.30298e-180	1.23296e-178
novel_mir5931	764	0	31.13	0.001	-14.926	Down	5.25474e-178	8.82463e-177
novel_mir12	761	0	31.01	0.001	-14.9204	Down	2.61182e-177	4.34027e-176
novel_mir711	742	0	30.24	0.001	-14.8842	Down	6.7211e-173	1.09399e-171
novel_mir3784	730	0	29.75	0.001	-14.8606	Down	4.1022e-170	6.60933e-169
novel_mir3590	720	0	29.34	0.001	-14.8406	Down	8.59666e-168	1.37807e-166
novel_mir3395	711	0	28.97	0.001	-14.8223	Down	1.05563e-165	1.6837e-164
novel_mir4358	700	0	28.52	0.001	-14.7997	Down	3.77534e-163	5.87398e-162
novel_mir2379	686	0	27.95	0.001	-14.7706	Down	6.71114e-160	1.02904e-158
novel_mir3880	678	0	27.63	0.001	-14.7539	Down	4.82888e-158	7.29851e-157
novel_mir5565	665	0	27.1	0.001	-14.726	Down	5.02984e-155	7.46015e-154
novel_mir298	655	0	26.69	0.001	-14.704	Down	1.05407e-152	1.52767e-151
novel_mir359	638	0	26	0.001	-14.6662	Down	9.31324e-149	1.31965e-147
novel_mir1125	610	0	24.86	0.001	-14.6015	Down	2.94292e-142	4.04365e-141
novel_mir4378	603	0	24.57	0.001	-14.5846	Down	1.24079e-140	1.68302e-139
novel_mir3065	603	0	24.57	0.001	-14.5846	Down	1.24079e-140	1.67586e-139
novel_mir188	563	0	22.94	0.001	-14.4856	Down	2.39304e-131	3.10021e-130
novel_mir3972	542	0	22.09	0.001	-14.4311	Down	1.79353e-126	2.29543e-125
novel_mir3602	507	0	20.66	0.001	-14.3346	Down	2.3895e-118	2.96261e-117
novel_mir3547	474	0	19.32	0.001	-14.2378	Down	1.09305e-110	1.29453e-109
novel_mir3551	473	0	19.27	0.001	-14.2341	Down	1.8654e-110	2.20104e-109
novel_mir86	466	0	18.99	0.001	-14.213	Down	7.86488e-109	9.144e-108
novel_mir4509	455	0	18.54	0.001	-14.1784	Down	2.81278e-106	3.22302e-105
novel_mir4140	451	0	18.38	0.001	-14.1658	Down	2.38596e-105	2.71435e-104
novel_mir4034	450	0	18.34	0.001	-14.1627	Down	4.07186e-105	4.59932e-104
novel_mir3413	411	0	16.75	0.001	-14.0319	Down	4.60168e-96	5.01915e-95
novel_mir3410	394	0	16.06	0.001	-13.9712	Down	4.06582e-92	4.31602e-91
novel_mir3360	393	0	16.01	0.001	-13.9667	Down	6.93872e-92	7.29255e-91
novel_mir3229	389	0	15.85	0.001	-13.9522	Down	5.8858e-91	6.12509e-90
novel_mir42	383	0	15.61	0.001	-13.9302	Down	1.4541e-89	1.48881e-88
novel_mir2826	353	0	14.38	0.001	-13.8118	Down	1.33824e-82	1.31098e-81
novel_mir494	352	0	14.34	0.001	-13.8078	Down	2.28384e-82	2.22359e-81
novel_mir220	349	0	14.22	0.001	-13.7956	Down	1.13517e-81	1.09848e-80
novel_mir729	342	0	13.94	0.001	-13.7669	Down	4.78606e-80	4.60332e-79
novel_mir1720	326	0	13.28	0.001	-13.697	Down	2.47788e-76	2.32e-75
novel_mir176	322	0	13.12	0.001	-13.6795	Down	2.10186e-75	1.95639e-74
novel_mir3703	314	0	12.8	0.001	-13.6439	Down	1.51236e-73	1.3715e-72
novel_mir5251	307	0	12.51	0.001	-13.6108	Down	6.3764e-72	5.71715e-71
novel_mir3876	307	0	12.51	0.001	-13.6108	Down	6.3764e-72	5.70104e-71
novel_mir5745	298	0	12.14	0.001	-13.5675	Down	7.82992e-70	6.88426e-69
novel_mir3505	287	0	11.7	0.001	-13.5142	Down	2.80028e-67	2.41524e-66
novel_mir3562	286	0	11.65	0.001	-13.508	Down	4.77896e-67	4.09957e-66
novel_mir589	285	0	11.61	0.001	-13.5031	Down	8.15578e-67	6.97748e-66
novel_mir222	284	0	11.57	0.001	-13.4981	Down	1.39186e-66	1.18757e-65
novel_mir513	278	0	11.33	0.001	-13.4679	Down	3.43862e-65	2.87973e-64
novel_mir3652	277	0	11.29	0.001	-13.4628	Down	5.86834e-65	4.90161e-64
novel_mir3479	274	0	11.17	0.001	-13.4473	Down	2.91682e-64	2.41093e-63
novel_mir4262	274	0	11.17	0.001	-13.4473	Down	2.91682e-64	2.40467e-63
novel_mir41	269	0	10.96	0.001	-13.42	Down	4.22248e-63	3.43645e-62
novel_mir3378	264	0	10.76	0.001	-13.3934	Down	6.11256e-62	4.91171e-61
novel_mir3516	264	0	10.76	0.001	-13.3934	Down	6.11256e-62	4.89931e-61
novel_mir3532	264	0	10.76	0.001	-13.3934	Down	6.11256e-62	4.88697e-61
novel_mir2101	258	0	10.51	0.001	-13.3595	Down	1.51012e-60	1.19529e-59
novel_mir1204	257	0	10.47	0.001	-13.354	Down	2.57716e-60	2.0348e-59
novel_mir4500	256	0	10.43	0.001	-13.3485	Down	4.3982e-60	3.44689e-59
novel_mir1242	246	0	10.02	0.001	-13.2906	Down	9.21696e-58	7.0155e-57
novel_mir3707	241	0	9.82	0.001	-13.2615	Down	1.33427e-56	1.00118e-55
novel_mir3556	236	0	9.62	0.001	-13.2318	Down	1.93153e-55	1.42574e-54
novel_mir235	236	0	9.62	0.001	-13.2318	Down	1.93153e-55	1.42243e-54
novel_mir111	234	0	9.54	0.001	-13.2198	Down	5.62554e-55	4.13321e-54
novel_mir2753	234	0	9.54	0.001	-13.2198	Down	5.62554e-55	4.12366e-54
novel_mir2535	234	0	9.54	0.001	-13.2198	Down	5.62554e-55	4.11416e-54
novel_mir5420	228	0	9.29	0.001	-13.1815	Down	1.3898e-53	9.9576e-53
novel_mir4054	227	0	9.25	0.001	-13.1752	Down	2.37182e-53	1.69553e-52
novel_mir233	224	0	9.13	0.001	-13.1564	Down	1.1789e-52	8.38975e-52
novel_mir4060	220	0	8.96	0.001	-13.1293	Down	1.00001e-51	7.08486e-51
novel_mir1516	214	0	8.72	0.001	-13.0901	Down	2.47054e-50	1.71963e-49
novel_mir1294	210	0	8.56	0.001	-13.0634	Down	2.09564e-49	1.44914e-48
novel_mir482	209	0	8.52	0.001	-13.0566	Down	3.57642e-49	2.46238e-48
novel_mir3717	209	0	8.52	0.001	-13.0566	Down	3.57642e-49	2.45705e-48
novel_mir2476	209	0	8.52	0.001	-13.0566	Down	3.57642e-49	2.45174e-48
novel_mir3919	208	0	8.48	0.001	-13.0498	Down	6.1035e-49	4.15719e-48
novel_mir4238	206	0	8.39	0.001	-13.0345	Down	1.77763e-48	1.2056e-47
novel_mir316	206	0	8.39	0.001	-13.0345	Down	1.77763e-48	1.20303e-47
novel_mir858	206	0	8.39	0.001	-13.0345	Down	1.77763e-48	1.20047e-47
novel_mir763	205	0	8.35	0.001	-13.0276	Down	3.0337e-48	2.03572e-47
novel_mir895	201	0	8.19	0.001	-12.9996	Down	2.57334e-47	1.71592e-46
novel_mir3844	196	0	7.99	0.001	-12.964	Down	3.72524e-46	2.43792e-45
novel_mir32	189	0	7.7	0.001	-12.9106	Down	1.57063e-44	1.00306e-43
novel_mir1653	187	0	7.62	0.001	-12.8956	Down	4.57444e-44	2.88654e-43
novel_mir3492	186	0	7.58	0.001	-12.888	Down	7.80672e-44	4.91637e-43
novel_mir3485	186	0	7.58	0.001	-12.888	Down	7.80672e-44	4.90664e-43
novel_mir345	184	0	7.5	0.001	-12.8727	Down	2.27368e-43	1.42622e-42
novel_mir3567	182	0	7.42	0.001	-12.8572	Down	6.62208e-43	4.12937e-42
novel_mir5920	182	0	7.42	0.001	-12.8572	Down	6.62208e-43	4.12127e-42
novel_mir3165	182	0	7.42	0.001	-12.8572	Down	6.62208e-43	4.11321e-42
novel_mir1817	179	0	7.29	0.001	-12.8317	Down	3.29146e-42	2.01681e-41
novel_mir679	179	0	7.29	0.001	-12.8317	Down	3.29146e-42	2.01293e-41
novel_mir164	177	0	7.21	0.001	-12.8158	Down	9.58628e-42	5.84009e-41
novel_mir268	176	0	7.17	0.001	-12.8078	Down	1.63599e-41	9.9476e-41
novel_mir4784	176	0	7.17	0.001	-12.8078	Down	1.63599e-41	9.92858e-41
novel_mir3790	175	0	7.13	0.001	-12.7997	Down	2.79198e-41	1.68795e-40
novel_mir680	175	0	7.13	0.001	-12.7997	Down	2.79198e-41	1.68474e-40
novel_mir3821	175	0	7.13	0.001	-12.7997	Down	2.79198e-41	1.68155e-40
novel_mir3544	173	0	7.05	0.001	-12.7834	Down	8.1316e-41	4.86058e-40
novel_mir3664	172	0	7.01	0.001	-12.7752	Down	1.38774e-40	8.20238e-40
novel_mir3719	171	0	6.97	0.001	-12.7669	Down	2.36832e-40	1.39722e-39
novel_mir3601	171	0	6.97	0.001	-12.7669	Down	2.36832e-40	1.39463e-39
novel_mir4383	170	0	6.93	0.001	-12.7586	Down	4.04176e-40	2.36689e-39
novel_mir2656	169	0	6.89	0.001	-12.7503	Down	6.89766e-40	4.0171e-39
novel_mir3828	169	0	6.89	0.001	-12.7503	Down	6.89766e-40	4.00974e-39
novel_mir1813	168	0	6.85	0.001	-12.7419	Down	1.17715e-39	6.80561e-39
novel_mir556	168	0	6.85	0.001	-12.7419	Down	1.17715e-39	6.79324e-39
novel_mir1709	168	0	6.85	0.001	-12.7419	Down	1.17715e-39	6.78091e-39
novel_mir4607	167	0	6.81	0.001	-12.7334	Down	2.00892e-39	1.15096e-38
novel_mir307	166	0	6.76	0.001	-12.7228	Down	3.42844e-39	1.95016e-38
novel_mir5226	166	0	6.76	0.001	-12.7228	Down	3.42844e-39	1.94667e-38
novel_mir5389	160	0	6.52	0.001	-12.6707	Down	8.47e-38	4.69176e-37
novel_mir1203	160	0	6.52	0.001	-12.6707	Down	8.47e-38	4.68359e-37
novel_mir3384	158	0	6.44	0.001	-12.6528	Down	2.46686e-37	1.35464e-36
novel_mir2123	157	0	6.4	0.001	-12.6439	Down	4.20996e-37	2.29595e-36
novel_mir686	153	0	6.23	0.001	-12.605	Down	3.5711e-36	1.91464e-35
novel_mir4563	152	0	6.19	0.001	-12.5957	Down	6.09444e-36	3.23474e-35
novel_mir1488	151	0	6.15	0.001	-12.5864	Down	1.04008e-35	5.49286e-35
novel_mir723	149	0	6.07	0.001	-12.5675	Down	3.0292e-35	1.58658e-34
novel_mir605	149	0	6.07	0.001	-12.5675	Down	3.0292e-35	1.58397e-34
novel_mir3129	149	0	6.07	0.001	-12.5675	Down	3.0292e-35	1.58136e-34
novel_mir4296	148	0	6.03	0.001	-12.5579	Down	5.16964e-35	2.69432e-34
novel_mir4190	147	0	5.99	0.001	-12.5483	Down	8.82248e-35	4.57558e-34
novel_mir736	147	0	5.99	0.001	-12.5483	Down	8.82248e-35	4.56812e-34
novel_mir4143	147	0	5.99	0.001	-12.5483	Down	8.82248e-35	4.56068e-34
novel_mir328	146	0	5.95	0.001	-12.5387	Down	1.50564e-34	7.75798e-34
novel_mir1749	144	0	5.87	0.001	-12.5191	Down	4.38516e-34	2.2413e-33
novel_mir1640	144	0	5.87	0.001	-12.5191	Down	4.38516e-34	2.2377e-33
novel_mir394	142	0	5.79	0.001	-12.4993	Down	1.27717e-33	6.46527e-33
novel_mir1909	140	0	5.7	0.001	-12.4767	Down	3.71972e-33	1.8681e-32
novel_mir1101	138	0	5.62	0.001	-12.4564	Down	1.08336e-32	5.39809e-32
novel_mir489	138	0	5.62	0.001	-12.4564	Down	1.08336e-32	5.38963e-32
novel_mir3764	136	0	5.54	0.001	-12.4357	Down	3.15526e-32	1.56726e-31
novel_mir311	136	0	5.54	0.001	-12.4357	Down	3.15526e-32	1.56481e-31
novel_mir118	136	0	5.54	0.001	-12.4357	Down	3.15526e-32	1.56237e-31
novel_mir451	136	0	5.54	0.001	-12.4357	Down	3.15526e-32	1.55994e-31
novel_mir2141	136	0	5.54	0.001	-12.4357	Down	3.15526e-32	1.55751e-31
novel_mir507	135	0	5.5	0.001	-12.4252	Down	5.38476e-32	2.6457e-31
novel_mir1762	135	0	5.5	0.001	-12.4252	Down	5.38476e-32	2.64161e-31
novel_mir1552	135	0	5.5	0.001	-12.4252	Down	5.38476e-32	2.63754e-31
novel_mir1013	134	0	5.46	0.001	-12.4147	Down	9.18964e-32	4.46676e-31
novel_mir3738	134	0	5.46	0.001	-12.4147	Down	9.18964e-32	4.45993e-31
novel_mir3353	133	0	5.42	0.001	-12.4041	Down	1.5683e-31	7.5881e-31
novel_mir1537	132	0	5.38	0.001	-12.3934	Down	2.67646e-31	1.28909e-30
novel_mir3351	131	0	5.34	0.001	-12.3826	Down	4.56764e-31	2.18998e-30
novel_mir3697	130	0	5.3	0.001	-12.3718	Down	7.79514e-31	3.69832e-30
novel_mir4978	129	0	5.26	0.001	-12.3608	Down	1.33032e-30	6.29273e-30
novel_mir671	128	0	5.22	0.001	-12.3498	Down	2.27032e-30	1.07073e-29
novel_mir1503	127	0	5.18	0.001	-12.3387	Down	3.87452e-30	1.81919e-29
novel_mir3737	126	0	5.13	0.001	-12.3247	Down	6.61224e-30	3.08183e-29
novel_mir535	126	0	5.13	0.001	-12.3247	Down	6.61224e-30	3.07731e-29
novel_mir5947	125	0	5.09	0.001	-12.3134	Down	1.12845e-29	5.24405e-29
novel_mir1523	124	0	5.05	0.001	-12.3021	Down	1.9258e-29	8.92335e-29
novel_mir3837	124	0	5.05	0.001	-12.3021	Down	1.9258e-29	8.91034e-29
novel_mir1571	123	0	5.01	0.001	-12.2906	Down	3.28658e-29	1.51843e-28
novel_mir4062	122	0	4.97	0.001	-12.279	Down	5.60886e-29	2.56891e-28
novel_mir153	121	0	4.93	0.001	-12.2674	Down	9.57208e-29	4.35269e-28
novel_mir5247	120	0	4.89	0.001	-12.2556	Down	1.63357e-28	7.40706e-28
novel_mir1107	119	0	4.85	0.001	-12.2438	Down	2.78784e-28	1.25869e-27
novel_mir2662	118	0	4.81	0.001	-12.2318	Down	4.75774e-28	2.14504e-27
novel_mir1507	118	0	4.81	0.001	-12.2318	Down	4.75774e-28	2.142e-27
novel_mir148	118	0	4.81	0.001	-12.2318	Down	4.75774e-28	2.13896e-27
novel_mir3688	118	0	4.81	0.001	-12.2318	Down	4.75774e-28	2.13594e-27
novel_mir3592	117	0	4.77	0.001	-12.2198	Down	8.11954e-28	3.62467e-27
novel_mir343	115	0	4.69	0.001	-12.1954	Down	2.3648e-27	1.04104e-26
novel_mir398	115	0	4.69	0.001	-12.1954	Down	2.3648e-27	1.03959e-26
novel_mir3659	115	0	4.69	0.001	-12.1954	Down	2.3648e-27	1.03816e-26
novel_mir6125	114	0	4.65	0.001	-12.183	Down	4.03576e-27	1.75955e-26
novel_mir3962	114	0	4.65	0.001	-12.183	Down	4.03576e-27	1.75713e-26
novel_mir4019	113	0	4.6	0.001	-12.1674	Down	6.88742e-27	2.99461e-26
novel_mir3723	113	0	4.6	0.001	-12.1674	Down	6.88742e-27	2.99052e-26
novel_mir684	111	0	4.52	0.001	-12.1421	Down	2.00594e-26	8.60386e-26
novel_mir997	110	0	4.48	0.001	-12.1293	Down	3.42334e-26	1.46635e-25
novel_mir5853	109	0	4.44	0.001	-12.1163	Down	5.84228e-26	2.49575e-25
novel_mir5183	108	0	4.4	0.001	-12.1033	Down	9.97042e-26	4.24211e-25
novel_mir772	108	0	4.4	0.001	-12.1033	Down	9.97042e-26	4.23643e-25
novel_mir879	106	0	4.32	0.001	-12.0768	Down	2.90386e-25	1.21755e-24
novel_mir906	105	0	4.28	0.001	-12.0634	Down	4.95572e-25	2.07239e-24
novel_mir683	103	0	4.2	0.001	-12.0362	Down	1.44334e-24	5.98064e-24
novel_mir1291	103	0	4.2	0.001	-12.0362	Down	1.44334e-24	5.97285e-24
novel_mir4624	103	0	4.2	0.001	-12.0362	Down	1.44334e-24	5.96507e-24
novel_mir756	103	0	4.2	0.001	-12.0362	Down	1.44334e-24	5.95731e-24
novel_mir3929	102	0	4.16	0.001	-12.0224	Down	2.4632e-24	1.0088e-23
novel_mir2803	102	0	4.16	0.001	-12.0224	Down	2.4632e-24	1.0075e-23
novel_mir4574	102	0	4.16	0.001	-12.0224	Down	2.4632e-24	1.0062e-23
novel_mir2887	102	0	4.16	0.001	-12.0224	Down	2.4632e-24	1.00491e-23
novel_mir3003	101	0	4.12	0.001	-12.0084	Down	4.20372e-24	1.70186e-23
novel_mir92	101	0	4.12	0.001	-12.0084	Down	4.20372e-24	1.6997e-23
novel_mir389	100	0	4.07	0.001	-11.9908	Down	7.17404e-24	2.89332e-23
novel_mir2681	99	0	4.03	0.001	-11.9766	Down	1.22432e-23	4.88805e-23
novel_mir31	99	0	4.03	0.001	-11.9766	Down	1.22432e-23	4.88191e-23
novel_mir448	99	0	4.03	0.001	-11.9766	Down	1.22432e-23	4.87578e-23
novel_mir5680	99	0	4.03	0.001	-11.9766	Down	1.22432e-23	4.86967e-23
novel_mir3627	98	0	3.99	0.001	-11.9622	Down	2.08942e-23	8.28977e-23
novel_mir1956	98	0	3.99	0.001	-11.9622	Down	2.08942e-23	8.27942e-23
novel_mir2321	98	0	3.99	0.001	-11.9622	Down	2.08942e-23	8.2691e-23
novel_mir4290	97	0	3.95	0.001	-11.9476	Down	3.5658e-23	1.40594e-22
novel_mir4126	97	0	3.95	0.001	-11.9476	Down	3.5658e-23	1.4042e-22
novel_mir2409	96	0	3.91	0.001	-11.933	Down	6.0854e-23	2.38163e-22
novel_mir2881	96	0	3.91	0.001	-11.933	Down	6.0854e-23	2.3787e-22
novel_mir172	95	0	3.87	0.001	-11.9181	Down	1.03853e-22	4.04952e-22
novel_mir4115	95	0	3.87	0.001	-11.9181	Down	1.03853e-22	4.04455e-22
novel_mir4990	94	0	3.83	0.001	-11.9031	Down	1.77236e-22	6.86034e-22
novel_mir1711	94	0	3.83	0.001	-11.9031	Down	1.77236e-22	6.85198e-22
novel_mir1966	93	0	3.79	0.001	-11.888	Down	3.0247e-22	1.15807e-21
mmu-miR-1843b-3p	92	0	3.75	0.001	-11.8727	Down	5.16196e-22	1.96687e-21
novel_mir628	91	0	3.71	0.001	-11.8572	Down	8.8094e-22	3.33266e-21
novel_mir4518	91	0	3.71	0.001	-11.8572	Down	8.8094e-22	3.32869e-21
novel_mir3503	90	0	3.67	0.001	-11.8416	Down	1.50341e-21	5.67399e-21
novel_mir488	90	0	3.67	0.001	-11.8416	Down	1.50341e-21	5.66725e-21
novel_mir2657	90	0	3.67	0.001	-11.8416	Down	1.50341e-21	5.66053e-21
novel_mir4284	90	0	3.67	0.001	-11.8416	Down	1.50341e-21	5.65382e-21
novel_mir189	89	0	3.63	0.001	-11.8258	Down	2.56572e-21	9.53583e-21
novel_mir5177	89	0	3.63	0.001	-11.8258	Down	2.56572e-21	9.52467e-21
novel_mir3835	89	0	3.63	0.001	-11.8258	Down	2.56572e-21	9.51355e-21
novel_mir3025	88	0	3.59	0.001	-11.8098	Down	4.37866e-21	1.61228e-20
novel_mir204	88	0	3.59	0.001	-11.8098	Down	4.37866e-21	1.61041e-20
novel_mir3913	87	0	3.55	0.001	-11.7936	Down	7.4726e-21	2.74197e-20
novel_mir1698	87	0	3.55	0.001	-11.7936	Down	7.4726e-21	2.7388e-20
novel_mir3745	86	0	3.5	0.001	-11.7731	Down	1.27527e-20	4.6579e-20
novel_mir552	85	0	3.46	0.001	-11.7566	Down	2.17638e-20	7.93092e-20
novel_mir382	85	0	3.46	0.001	-11.7566	Down	2.17638e-20	7.92182e-20
novel_mir3851	85	0	3.46	0.001	-11.7566	Down	2.17638e-20	7.91275e-20
novel_mir150	84	0	3.42	0.001	-11.7398	Down	3.7142e-20	1.34117e-19
novel_mir4745	84	0	3.42	0.001	-11.7398	Down	3.7142e-20	1.33964e-19
novel_mir239	84	0	3.42	0.001	-11.7398	Down	3.7142e-20	1.33812e-19
novel_mir5586	83	0	3.38	0.001	-11.7228	Down	6.33866e-20	2.2682e-19
novel_mir2834	83	0	3.38	0.001	-11.7228	Down	6.33866e-20	2.26564e-19
novel_mir3115	82	0	3.34	0.001	-11.7056	Down	1.08175e-19	3.86219e-19
novel_mir3934	82	0	3.34	0.001	-11.7056	Down	1.08175e-19	3.85785e-19
novel_mir5804	82	0	3.34	0.001	-11.7056	Down	1.08175e-19	3.85352e-19
novel_mir5608	82	0	3.34	0.001	-11.7056	Down	1.08175e-19	3.8492e-19
novel_mir929	82	0	3.34	0.001	-11.7056	Down	1.08175e-19	3.84489e-19
novel_mir1233	82	0	3.34	0.001	-11.7056	Down	1.08175e-19	3.84059e-19
novel_mir144	81	0	3.3	0.001	-11.6883	Down	1.84612e-19	6.51064e-19
novel_mir1443	81	0	3.3	0.001	-11.6883	Down	1.84612e-19	6.50342e-19
novel_mir1497	81	0	3.3	0.001	-11.6883	Down	1.84612e-19	6.49621e-19
novel_mir3429	81	0	3.3	0.001	-11.6883	Down	1.84612e-19	6.48901e-19
novel_mir154	81	0	3.3	0.001	-11.6883	Down	1.84612e-19	6.48183e-19
novel_mir4152	80	0	3.26	0.001	-11.6707	Down	3.15058e-19	1.10253e-18
novel_mir126	80	0	3.26	0.001	-11.6707	Down	3.15058e-19	1.10132e-18
novel_mir6150	80	0	3.26	0.001	-11.6707	Down	3.15058e-19	1.1001e-18
novel_mir265	79	0	3.22	0.001	-11.6528	Down	5.37678e-19	1.86309e-18
novel_mir2564	79	0	3.22	0.001	-11.6528	Down	5.37678e-19	1.86106e-18
novel_mir3863	79	0	3.22	0.001	-11.6528	Down	5.37678e-19	1.85903e-18
novel_mir4475	79	0	3.22	0.001	-11.6528	Down	5.37678e-19	1.85701e-18
novel_mir2441	78	0	3.18	0.001	-11.6348	Down	9.176e-19	3.13168e-18
mmu-miR-212-3p	78	0	3.18	0.001	-11.6348	Down	9.176e-19	3.12832e-18
novel_mir95	78	0	3.18	0.001	-11.6348	Down	9.176e-19	3.12496e-18
novel_mir1339	78	0	3.18	0.001	-11.6348	Down	9.176e-19	3.12161e-18
novel_mir342	78	0	3.18	0.001	-11.6348	Down	9.176e-19	3.11827e-18
novel_mir604	77	0	3.14	0.001	-11.6165	Down	1.56598e-18	5.31026e-18
novel_mir480	77	0	3.14	0.001	-11.6165	Down	1.56598e-18	5.3046e-18
novel_mir5505	77	0	3.14	0.001	-11.6165	Down	1.56598e-18	5.29894e-18
novel_mir145	76	0	3.1	0.001	-11.5981	Down	2.6725e-18	8.98572e-18
novel_mir900	76	0	3.1	0.001	-11.5981	Down	2.6725e-18	8.97621e-18
novel_mir2883	76	0	3.1	0.001	-11.5981	Down	2.6725e-18	8.96672e-18
novel_mir5291	76	0	3.1	0.001	-11.5981	Down	2.6725e-18	8.95725e-18
novel_mir4177	75	0	3.06	0.001	-11.5793	Down	4.56088e-18	1.52542e-17
novel_mir5107	74	0	3.02	0.001	-11.5603	Down	7.78358e-18	2.58963e-17
novel_mir3253	74	0	3.02	0.001	-11.5603	Down	7.78358e-18	2.58692e-17
novel_mir862	73	0	2.97	0.001	-11.5362	Down	1.32834e-17	4.39642e-17
novel_mir944	73	0	2.97	0.001	-11.5362	Down	1.32834e-17	4.39184e-17
novel_mir258	73	0	2.97	0.001	-11.5362	Down	1.32834e-17	4.38727e-17
novel_mir5269	72	0	2.93	0.001	-11.5167	Down	2.26694e-17	7.47949e-17
novel_mir4695	72	0	2.93	0.001	-11.5167	Down	2.26694e-17	7.47172e-17
novel_mir346	72	0	2.93	0.001	-11.5167	Down	2.26694e-17	7.46397e-17
novel_mir132	72	0	2.93	0.001	-11.5167	Down	2.26694e-17	7.45624e-17
novel_mir1326	71	0	2.89	0.001	-11.4969	Down	3.86878e-17	1.26073e-16
novel_mir190	71	0	2.89	0.001	-11.4969	Down	3.86878e-17	1.25944e-16
novel_mir5543	71	0	2.89	0.001	-11.4969	Down	3.86878e-17	1.25815e-16
novel_mir1016	71	0	2.89	0.001	-11.4969	Down	3.86878e-17	1.25686e-16
novel_mir3800	71	0	2.89	0.001	-11.4969	Down	3.86878e-17	1.25557e-16
novel_mir5584	70	0	2.85	0.001	-11.4767	Down	6.60244e-17	2.13838e-16
novel_mir1231	70	0	2.85	0.001	-11.4767	Down	6.60244e-17	2.1362e-16
novel_mir496	70	0	2.85	0.001	-11.4767	Down	6.60244e-17	2.13403e-16
novel_mir4028	70	0	2.85	0.001	-11.4767	Down	6.60244e-17	2.13186e-16
novel_mir769	70	0	2.85	0.001	-11.4767	Down	6.60244e-17	2.12969e-16
novel_mir1175	70	0	2.85	0.001	-11.4767	Down	6.60244e-17	2.12753e-16
novel_mir2045	69	0	2.81	0.001	-11.4564	Down	1.12677e-16	3.60522e-16
novel_mir429	69	0	2.81	0.001	-11.4564	Down	1.12677e-16	3.60159e-16
novel_mir1557	69	0	2.81	0.001	-11.4564	Down	1.12677e-16	3.59796e-16
novel_mir4008	69	0	2.81	0.001	-11.4564	Down	1.12677e-16	3.59435e-16
novel_mir3421	69	0	2.81	0.001	-11.4564	Down	1.12677e-16	3.59074e-16
novel_mir364	68	0	2.77	0.001	-11.4357	Down	1.92295e-16	6.061e-16
novel_mir166	68	0	2.77	0.001	-11.4357	Down	1.92295e-16	6.05499e-16
novel_mir3348	68	0	2.77	0.001	-11.4357	Down	1.92295e-16	6.04899e-16
novel_mir5600	68	0	2.77	0.001	-11.4357	Down	1.92295e-16	6.043e-16
novel_mir2943	68	0	2.77	0.001	-11.4357	Down	1.92295e-16	6.03702e-16
novel_mir4794	68	0	2.77	0.001	-11.4357	Down	1.92295e-16	6.03106e-16
novel_mir2611	68	0	2.77	0.001	-11.4357	Down	1.92295e-16	6.0251e-16
novel_mir1241	67	0	2.73	0.001	-11.4147	Down	3.2817e-16	1.02723e-15
novel_mir4570	67	0	2.73	0.001	-11.4147	Down	3.2817e-16	1.02622e-15
novel_mir956	67	0	2.73	0.001	-11.4147	Down	3.2817e-16	1.02521e-15
novel_mir975	67	0	2.73	0.001	-11.4147	Down	3.2817e-16	1.0242e-15
novel_mir2495	67	0	2.73	0.001	-11.4147	Down	3.2817e-16	1.02319e-15
novel_mir4779	67	0	2.73	0.001	-11.4147	Down	3.2817e-16	1.02219e-15
novel_mir1733	67	0	2.73	0.001	-11.4147	Down	3.2817e-16	1.02119e-15
novel_mir139	67	0	2.73	0.001	-11.4147	Down	3.2817e-16	1.02019e-15
novel_mir3045	67	0	2.73	0.001	-11.4147	Down	3.2817e-16	1.01919e-15
novel_mir3243	66	0	2.69	0.001	-11.3934	Down	5.60054e-16	1.73088e-15
novel_mir401	66	0	2.69	0.001	-11.3934	Down	5.60054e-16	1.72919e-15
novel_mir66	66	0	2.69	0.001	-11.3934	Down	5.60054e-16	1.72751e-15
novel_mir1191	66	0	2.69	0.001	-11.3934	Down	5.60054e-16	1.72584e-15
novel_mir2378	66	0	2.69	0.001	-11.3934	Down	5.60054e-16	1.72416e-15
novel_mir257	66	0	2.69	0.001	-11.3934	Down	5.60054e-16	1.72249e-15
novel_mir2031	66	0	2.69	0.001	-11.3934	Down	5.60054e-16	1.72082e-15
novel_mir4424	66	0	2.69	0.001	-11.3934	Down	5.60054e-16	1.71916e-15
novel_mir4331	66	0	2.69	0.001	-11.3934	Down	5.60054e-16	1.7175e-15
novel_mir5892	66	0	2.69	0.001	-11.3934	Down	5.60054e-16	1.71584e-15
novel_mir1446	65	0	2.65	0.001	-11.3718	Down	9.55788e-16	2.9086e-15
novel_mir1641	65	0	2.65	0.001	-11.3718	Down	9.55788e-16	2.90582e-15
novel_mir521	65	0	2.65	0.001	-11.3718	Down	9.55788e-16	2.90303e-15
novel_mir1354	65	0	2.65	0.001	-11.3718	Down	9.55788e-16	2.90026e-15
novel_mir3470	64	0	2.61	0.001	-11.3498	Down	1.63114e-15	4.89806e-15
novel_mir1668	64	0	2.61	0.001	-11.3498	Down	1.63114e-15	4.89343e-15
novel_mir777	64	0	2.61	0.001	-11.3498	Down	1.63114e-15	4.88881e-15
novel_mir531	64	0	2.61	0.001	-11.3498	Down	1.63114e-15	4.8842e-15
novel_mir675	63	0	2.57	0.001	-11.3276	Down	2.7837e-15	8.24204e-15
novel_mir5042	63	0	2.57	0.001	-11.3276	Down	2.7837e-15	8.23436e-15
novel_mir2361	63	0	2.57	0.001	-11.3276	Down	2.7837e-15	8.22669e-15
novel_mir1385	63	0	2.57	0.001	-11.3276	Down	2.7837e-15	8.21904e-15
novel_mir3808	63	0	2.57	0.001	-11.3276	Down	2.7837e-15	8.2114e-15
novel_mir2413	63	0	2.57	0.001	-11.3276	Down	2.7837e-15	8.20377e-15
novel_mir6034	63	0	2.57	0.001	-11.3276	Down	2.7837e-15	8.19616e-15
novel_mir1337	63	0	2.57	0.001	-11.3276	Down	2.7837e-15	8.18857e-15
novel_mir336	63	0	2.57	0.001	-11.3276	Down	2.7837e-15	8.18099e-15
novel_mir830	62	0	2.53	0.001	-11.3049	Down	4.75068e-15	1.39359e-14
novel_mir160	62	0	2.53	0.001	-11.3049	Down	4.75068e-15	1.3923e-14
novel_mir4837	62	0	2.53	0.001	-11.3049	Down	4.75068e-15	1.39102e-14
novel_mir784	62	0	2.53	0.001	-11.3049	Down	4.75068e-15	1.38974e-14
novel_mir5852	62	0	2.53	0.001	-11.3049	Down	4.75068e-15	1.38846e-14
novel_mir570	62	0	2.53	0.001	-11.3049	Down	4.75068e-15	1.38718e-14
novel_mir5339	61	0	2.49	0.001	-11.2819	Down	8.1075e-15	2.34151e-14
novel_mir1840	61	0	2.49	0.001	-11.2819	Down	8.1075e-15	2.33938e-14
novel_mir5307	61	0	2.49	0.001	-11.2819	Down	8.1075e-15	2.33726e-14
novel_mir3809	61	0	2.49	0.001	-11.2819	Down	8.1075e-15	2.33514e-14
novel_mir2104	60	0	2.44	0.001	-11.2527	Down	1.38362e-14	3.93867e-14
novel_mir3858	60	0	2.44	0.001	-11.2527	Down	1.38362e-14	3.93515e-14
novel_mir1487	60	0	2.44	0.001	-11.2527	Down	1.38362e-14	3.93162e-14
novel_mir4095	60	0	2.44	0.001	-11.2527	Down	1.38362e-14	3.92811e-14
novel_mir4106	60	0	2.44	0.001	-11.2527	Down	1.38362e-14	3.9246e-14
novel_mir1992	60	0	2.44	0.001	-11.2527	Down	1.38362e-14	3.92109e-14
novel_mir4279	60	0	2.44	0.001	-11.2527	Down	1.38362e-14	3.91759e-14
novel_mir4180	60	0	2.44	0.001	-11.2527	Down	1.38362e-14	3.9141e-14
novel_mir219	59	0	2.4	0.001	-11.2288	Down	2.36128e-14	6.65014e-14
novel_mir2671	59	0	2.4	0.001	-11.2288	Down	2.36128e-14	6.64424e-14
novel_mir5846	59	0	2.4	0.001	-11.2288	Down	2.36128e-14	6.63835e-14
novel_mir807	59	0	2.4	0.001	-11.2288	Down	2.36128e-14	6.63248e-14
mmu-miR-1964-3p	59	0	2.4	0.001	-11.2288	Down	2.36128e-14	6.62662e-14
novel_mir5234	59	0	2.4	0.001	-11.2288	Down	2.36128e-14	6.62076e-14
novel_mir3864	59	0	2.4	0.001	-11.2288	Down	2.36128e-14	6.61492e-14
novel_mir914	59	0	2.4	0.001	-11.2288	Down	2.36128e-14	6.60909e-14
novel_mir1106	58	0	2.36	0.001	-11.2046	Down	4.02978e-14	1.11029e-13
novel_mir302	58	0	2.36	0.001	-11.2046	Down	4.02978e-14	1.10933e-13
novel_mir303	58	0	2.36	0.001	-11.2046	Down	4.02978e-14	1.10836e-13
novel_mir537	58	0	2.36	0.001	-11.2046	Down	4.02978e-14	1.1074e-13
novel_mir3660	58	0	2.36	0.001	-11.2046	Down	4.02978e-14	1.10645e-13
novel_mir196	58	0	2.36	0.001	-11.2046	Down	4.02978e-14	1.10549e-13
novel_mir1989	58	0	2.36	0.001	-11.2046	Down	4.02978e-14	1.10454e-13
novel_mir5352	58	0	2.36	0.001	-11.2046	Down	4.02978e-14	1.10358e-13
novel_mir1510	58	0	2.36	0.001	-11.2046	Down	4.02978e-14	1.10263e-13
novel_mir1647	58	0	2.36	0.001	-11.2046	Down	4.02978e-14	1.10168e-13
novel_mir2175	57	0	2.32	0.001	-11.1799	Down	6.8772e-14	1.87046e-13
novel_mir1544	57	0	2.32	0.001	-11.1799	Down	6.8772e-14	1.86886e-13
novel_mir3511	57	0	2.32	0.001	-11.1799	Down	6.8772e-14	1.86726e-13
novel_mir306	57	0	2.32	0.001	-11.1799	Down	6.8772e-14	1.86566e-13
novel_mir4108	56	0	2.28	0.001	-11.1548	Down	1.17366e-13	3.15963e-13
novel_mir1632	56	0	2.28	0.001	-11.1548	Down	1.17366e-13	3.15695e-13
novel_mir5833	56	0	2.28	0.001	-11.1548	Down	1.17366e-13	3.15428e-13
novel_mir5051	56	0	2.28	0.001	-11.1548	Down	1.17366e-13	3.15161e-13
novel_mir1930	56	0	2.28	0.001	-11.1548	Down	1.17366e-13	3.14895e-13
novel_mir808	56	0	2.28	0.001	-11.1548	Down	1.17366e-13	3.14629e-13
novel_mir6093	56	0	2.28	0.001	-11.1548	Down	1.17366e-13	3.14363e-13
novel_mir4446	55	0	2.24	0.001	-11.1293	Down	2.00298e-13	5.28907e-13
novel_mir2901	55	0	2.24	0.001	-11.1293	Down	2.00298e-13	5.28467e-13
novel_mir5477	55	0	2.24	0.001	-11.1293	Down	2.00298e-13	5.28028e-13
novel_mir315	55	0	2.24	0.001	-11.1293	Down	2.00298e-13	5.2759e-13
novel_mir3018	55	0	2.24	0.001	-11.1293	Down	2.00298e-13	5.27152e-13
novel_mir5884	54	0	2.2	0.001	-11.1033	Down	3.41826e-13	8.97399e-13
novel_mir2054	54	0	2.2	0.001	-11.1033	Down	3.41826e-13	8.96658e-13
novel_mir1419	54	0	2.2	0.001	-11.1033	Down	3.41826e-13	8.95917e-13
novel_mir5467	54	0	2.2	0.001	-11.1033	Down	3.41826e-13	8.95178e-13
novel_mir3925	54	0	2.2	0.001	-11.1033	Down	3.41826e-13	8.9444e-13
novel_mir5091	54	0	2.2	0.001	-11.1033	Down	3.41826e-13	8.93703e-13
novel_mir630	54	0	2.2	0.001	-11.1033	Down	3.41826e-13	8.92968e-13
novel_mir3103	54	0	2.2	0.001	-11.1033	Down	3.41826e-13	8.92233e-13
novel_mir5929	53	0	2.16	0.001	-11.0768	Down	5.8336e-13	1.50903e-12
novel_mir2828	53	0	2.16	0.001	-11.0768	Down	5.8336e-13	1.50781e-12
novel_mir248	52	0	2.12	0.001	-11.0498	Down	9.95562e-13	2.56487e-12
novel_mir3740	52	0	2.12	0.001	-11.0498	Down	9.95562e-13	2.56278e-12
novel_mir1119	52	0	2.12	0.001	-11.0498	Down	9.95562e-13	2.56071e-12
novel_mir5021	52	0	2.12	0.001	-11.0498	Down	9.95562e-13	2.55863e-12
novel_mir5294	52	0	2.12	0.001	-11.0498	Down	9.95562e-13	2.55656e-12
novel_mir1377	52	0	2.12	0.001	-11.0498	Down	9.95562e-13	2.5545e-12
novel_mir4985	52	0	2.12	0.001	-11.0498	Down	9.95562e-13	2.55243e-12
novel_mir4348	52	0	2.12	0.001	-11.0498	Down	9.95562e-13	2.55037e-12
novel_mir437	52	0	2.12	0.001	-11.0498	Down	9.95562e-13	2.54832e-12
novel_mir904	52	0	2.12	0.001	-11.0498	Down	9.95562e-13	2.54626e-12
novel_mir293	51	0	2.08	0.001	-11.0224	Down	1.69903e-12	4.31762e-12
novel_mir3963	51	0	2.08	0.001	-11.0224	Down	1.69903e-12	4.31417e-12
novel_mir1955	51	0	2.08	0.001	-11.0224	Down	1.69903e-12	4.31072e-12
novel_mir4860	51	0	2.08	0.001	-11.0224	Down	1.69903e-12	4.30728e-12
novel_mir793	51	0	2.08	0.001	-11.0224	Down	1.69903e-12	4.30384e-12
novel_mir2601	51	0	2.08	0.001	-11.0224	Down	1.69903e-12	4.30041e-12
novel_mir1728	51	0	2.08	0.001	-11.0224	Down	1.69903e-12	4.29698e-12
novel_mir4925	51	0	2.08	0.001	-11.0224	Down	1.69903e-12	4.29356e-12
novel_mir3247	51	0	2.08	0.001	-11.0224	Down	1.69903e-12	4.29014e-12
novel_mir2519	51	0	2.08	0.001	-11.0224	Down	1.69903e-12	4.28673e-12
novel_mir2972	51	0	2.08	0.001	-11.0224	Down	1.69903e-12	4.28333e-12
novel_mir1390	51	0	2.08	0.001	-11.0224	Down	1.69903e-12	4.27993e-12
novel_mir3902	50	0	2.04	0.001	-10.9944	Down	2.89956e-12	7.22954e-12
novel_mir1545	50	0	2.04	0.001	-10.9944	Down	2.89956e-12	7.22386e-12
novel_mir1593	50	0	2.04	0.001	-10.9944	Down	2.89956e-12	7.2182e-12
novel_mir4085	50	0	2.04	0.001	-10.9944	Down	2.89956e-12	7.21254e-12
novel_mir3416	50	0	2.04	0.001	-10.9944	Down	2.89956e-12	7.20689e-12
novel_mir4910	50	0	2.04	0.001	-10.9944	Down	2.89956e-12	7.20125e-12
novel_mir3654	50	0	2.04	0.001	-10.9944	Down	2.89956e-12	7.19562e-12
novel_mir3139	49	0	2	0.001	-10.9658	Down	4.94838e-12	1.22417e-11
novel_mir1006	49	0	2	0.001	-10.9658	Down	4.94838e-12	1.22322e-11
novel_mir788	49	0	2	0.001	-10.9658	Down	4.94838e-12	1.22227e-11
novel_mir1974	49	0	2	0.001	-10.9658	Down	4.94838e-12	1.22132e-11
novel_mir2027	49	0	2	0.001	-10.9658	Down	4.94838e-12	1.22037e-11
novel_mir5316	49	0	2	0.001	-10.9658	Down	4.94838e-12	1.21942e-11
novel_mir580	49	0	2	0.001	-10.9658	Down	4.94838e-12	1.21848e-11
novel_mir2262	49	0	2	0.001	-10.9658	Down	4.94838e-12	1.21753e-11
novel_mir4237	49	0	2	0.001	-10.9658	Down	4.94838e-12	1.21659e-11
novel_mir1365	49	0	2	0.001	-10.9658	Down	4.94838e-12	1.21565e-11
novel_mir1399	49	0	2	0.001	-10.9658	Down	4.94838e-12	1.21471e-11
novel_mir5327	49	0	2	0.001	-10.9658	Down	4.94838e-12	1.21377e-11
novel_mir5411	49	0	2	0.001	-10.9658	Down	4.94838e-12	1.21283e-11
novel_mir5767	49	0	2	0.001	-10.9658	Down	4.94838e-12	1.21189e-11
novel_mir4564	48	0	1.96	0.001	-10.9366	Down	8.4449e-12	2.043e-11
novel_mir1894	48	0	1.96	0.001	-10.9366	Down	8.4449e-12	2.04144e-11
novel_mir1115	48	0	1.96	0.001	-10.9366	Down	8.4449e-12	2.03989e-11
novel_mir1551	48	0	1.96	0.001	-10.9366	Down	8.4449e-12	2.03834e-11
novel_mir4107	48	0	1.96	0.001	-10.9366	Down	8.4449e-12	2.03679e-11
novel_mir2916	48	0	1.96	0.001	-10.9366	Down	8.4449e-12	2.03524e-11
novel_mir2424	48	0	1.96	0.001	-10.9366	Down	8.4449e-12	2.0337e-11
novel_mir5869	48	0	1.96	0.001	-10.9366	Down	8.4449e-12	2.03215e-11
novel_mir52	48	0	1.96	0.001	-10.9366	Down	8.4449e-12	2.03061e-11
novel_mir1473	48	0	1.96	0.001	-10.9366	Down	8.4449e-12	2.02908e-11
novel_mir1882	47	0	1.92	0.001	-10.9069	Down	1.4412e-11	3.45758e-11
novel_mir264	47	0	1.92	0.001	-10.9069	Down	1.4412e-11	3.45497e-11
novel_mir2047	47	0	1.92	0.001	-10.9069	Down	1.4412e-11	3.45236e-11
novel_mir4202	47	0	1.92	0.001	-10.9069	Down	1.4412e-11	3.44976e-11
novel_mir5058	47	0	1.92	0.001	-10.9069	Down	1.4412e-11	3.44716e-11
novel_mir2346	47	0	1.92	0.001	-10.9069	Down	1.4412e-11	3.44456e-11
novel_mir4751	47	0	1.92	0.001	-10.9069	Down	1.4412e-11	3.44197e-11
novel_mir5373	47	0	1.92	0.001	-10.9069	Down	1.4412e-11	3.43938e-11
novel_mir4219	47	0	1.92	0.001	-10.9069	Down	1.4412e-11	3.4368e-11
novel_mir249	47	0	1.92	0.001	-10.9069	Down	1.4412e-11	3.43422e-11
novel_mir4032	47	0	1.92	0.001	-10.9069	Down	1.4412e-11	3.43164e-11
novel_mir4101	47	0	1.92	0.001	-10.9069	Down	1.4412e-11	3.42907e-11
novel_mir542	47	0	1.92	0.001	-10.9069	Down	1.4412e-11	3.4265e-11
novel_mir4056	47	0	1.92	0.001	-10.9069	Down	1.4412e-11	3.42394e-11
mmu-miR-7044-3p	47	0	1.92	0.001	-10.9069	Down	1.4412e-11	3.42138e-11
novel_mir2759	47	0	1.92	0.001	-10.9069	Down	1.4412e-11	3.41882e-11
novel_mir4551	46	0	1.87	0.001	-10.8688	Down	2.45956e-11	5.7827e-11
novel_mir3633	46	0	1.87	0.001	-10.8688	Down	2.45956e-11	5.77842e-11
novel_mir626	46	0	1.87	0.001	-10.8688	Down	2.45956e-11	5.77414e-11
novel_mir1348	46	0	1.87	0.001	-10.8688	Down	2.45956e-11	5.76988e-11
novel_mir3954	46	0	1.87	0.001	-10.8688	Down	2.45956e-11	5.76562e-11
novel_mir1912	46	0	1.87	0.001	-10.8688	Down	2.45956e-11	5.76136e-11
novel_mir4900	46	0	1.87	0.001	-10.8688	Down	2.45956e-11	5.75711e-11
novel_mir5343	46	0	1.87	0.001	-10.8688	Down	2.45956e-11	5.75287e-11
novel_mir624	46	0	1.87	0.001	-10.8688	Down	2.45956e-11	5.74863e-11
novel_mir4955	46	0	1.87	0.001	-10.8688	Down	2.45956e-11	5.7444e-11
novel_mir5303	46	0	1.87	0.001	-10.8688	Down	2.45956e-11	5.74018e-11
novel_mir5971	46	0	1.87	0.001	-10.8688	Down	2.45956e-11	5.73596e-11
novel_mir4791	45	0	1.83	0.001	-10.8376	Down	4.19748e-11	9.6612e-11
novel_mir1990	45	0	1.83	0.001	-10.8376	Down	4.19748e-11	9.6542e-11
novel_mir4344	45	0	1.83	0.001	-10.8376	Down	4.19748e-11	9.64721e-11
novel_mir4752	45	0	1.83	0.001	-10.8376	Down	4.19748e-11	9.64023e-11
novel_mir4599	45	0	1.83	0.001	-10.8376	Down	4.19748e-11	9.63326e-11
novel_mir4970	45	0	1.83	0.001	-10.8376	Down	4.19748e-11	9.6263e-11
novel_mir1040	45	0	1.83	0.001	-10.8376	Down	4.19748e-11	9.61935e-11
novel_mir2202	45	0	1.83	0.001	-10.8376	Down	4.19748e-11	9.61241e-11
novel_mir3958	45	0	1.83	0.001	-10.8376	Down	4.19748e-11	9.60548e-11
novel_mir1696	45	0	1.83	0.001	-10.8376	Down	4.19748e-11	9.59856e-11
novel_mir901	45	0	1.83	0.001	-10.8376	Down	4.19748e-11	9.59165e-11
novel_mir477	45	0	1.83	0.001	-10.8376	Down	4.19748e-11	9.58475e-11
novel_mir1334	45	0	1.83	0.001	-10.8376	Down	4.19748e-11	9.57786e-11
novel_mir1659	45	0	1.83	0.001	-10.8376	Down	4.19748e-11	9.57098e-11
novel_mir2906	44	0	1.79	0.001	-10.8057	Down	7.1634e-11	1.62637e-10
novel_mir3612	44	0	1.79	0.001	-10.8057	Down	7.1634e-11	1.62521e-10
novel_mir2100	44	0	1.79	0.001	-10.8057	Down	7.1634e-11	1.62405e-10
novel_mir2990	44	0	1.79	0.001	-10.8057	Down	7.1634e-11	1.62289e-10
novel_mir4436	44	0	1.79	0.001	-10.8057	Down	7.1634e-11	1.62173e-10
novel_mir381	44	0	1.79	0.001	-10.8057	Down	7.1634e-11	1.62057e-10
novel_mir1873	44	0	1.79	0.001	-10.8057	Down	7.1634e-11	1.61942e-10
novel_mir5162	44	0	1.79	0.001	-10.8057	Down	7.1634e-11	1.61827e-10
novel_mir337	44	0	1.79	0.001	-10.8057	Down	7.1634e-11	1.61711e-10
novel_mir903	44	0	1.79	0.001	-10.8057	Down	7.1634e-11	1.61597e-10
novel_mir743	43	0	1.75	0.001	-10.7731	Down	1.22251e-10	2.7268e-10
novel_mir4726	43	0	1.75	0.001	-10.7731	Down	1.22251e-10	2.72488e-10
novel_mir894	43	0	1.75	0.001	-10.7731	Down	1.22251e-10	2.72297e-10
novel_mir3683	43	0	1.75	0.001	-10.7731	Down	1.22251e-10	2.72106e-10
novel_mir5453	43	0	1.75	0.001	-10.7731	Down	1.22251e-10	2.71915e-10
novel_mir3628	43	0	1.75	0.001	-10.7731	Down	1.22251e-10	2.71725e-10
mmu-miR-7052-3p	43	0	1.75	0.001	-10.7731	Down	1.22251e-10	2.71535e-10
novel_mir4554	43	0	1.75	0.001	-10.7731	Down	1.22251e-10	2.71345e-10
novel_mir2858	43	0	1.75	0.001	-10.7731	Down	1.22251e-10	2.71155e-10
novel_mir1149	43	0	1.75	0.001	-10.7731	Down	1.22251e-10	2.70966e-10
novel_mir5044	43	0	1.75	0.001	-10.7731	Down	1.22251e-10	2.70777e-10
novel_mir426	43	0	1.75	0.001	-10.7731	Down	1.22251e-10	2.70588e-10
novel_mir2414	43	0	1.75	0.001	-10.7731	Down	1.22251e-10	2.704e-10
novel_mir1008	43	0	1.75	0.001	-10.7731	Down	1.22251e-10	2.70211e-10
mmu-miR-203b-3p	43	0	1.75	0.001	-10.7731	Down	1.22251e-10	2.70023e-10
novel_mir1290	43	0	1.75	0.001	-10.7731	Down	1.22251e-10	2.69835e-10
novel_mir185	43	0	1.75	0.001	-10.7731	Down	1.22251e-10	2.69648e-10
novel_mir3917	43	0	1.75	0.001	-10.7731	Down	1.22251e-10	2.69461e-10
novel_mir5986	42	0	1.71	0.001	-10.7398	Down	2.08632e-10	4.58586e-10
novel_mir5309	42	0	1.71	0.001	-10.7398	Down	2.08632e-10	4.58268e-10
novel_mir617	42	0	1.71	0.001	-10.7398	Down	2.08632e-10	4.57952e-10
novel_mir685	42	0	1.71	0.001	-10.7398	Down	2.08632e-10	4.57635e-10
novel_mir4377	42	0	1.71	0.001	-10.7398	Down	2.08632e-10	4.57319e-10
novel_mir1644	42	0	1.71	0.001	-10.7398	Down	2.08632e-10	4.57003e-10
novel_mir5348	42	0	1.71	0.001	-10.7398	Down	2.08632e-10	4.56688e-10
novel_mir4666	42	0	1.71	0.001	-10.7398	Down	2.08632e-10	4.56374e-10
novel_mir5775	42	0	1.71	0.001	-10.7398	Down	2.08632e-10	4.56059e-10
novel_mir824	42	0	1.71	0.001	-10.7398	Down	2.08632e-10	4.55745e-10
novel_mir950	42	0	1.71	0.001	-10.7398	Down	2.08632e-10	4.55432e-10
novel_mir5626	42	0	1.71	0.001	-10.7398	Down	2.08632e-10	4.55119e-10
novel_mir4297	42	0	1.71	0.001	-10.7398	Down	2.08632e-10	4.54806e-10
novel_mir3401	41	0	1.67	0.001	-10.7056	Down	3.56052e-10	7.70879e-10
novel_mir2426	41	0	1.67	0.001	-10.7056	Down	3.56052e-10	7.70354e-10
novel_mir1230	41	0	1.67	0.001	-10.7056	Down	3.56052e-10	7.69829e-10
novel_mir2224	41	0	1.67	0.001	-10.7056	Down	3.56052e-10	7.69305e-10
novel_mir3515	41	0	1.67	0.001	-10.7056	Down	3.56052e-10	7.68782e-10
novel_mir4203	41	0	1.67	0.001	-10.7056	Down	3.56052e-10	7.68259e-10
novel_mir284	41	0	1.67	0.001	-10.7056	Down	3.56052e-10	7.67737e-10
novel_mir2303	41	0	1.67	0.001	-10.7056	Down	3.56052e-10	7.67216e-10
novel_mir4730	41	0	1.67	0.001	-10.7056	Down	3.56052e-10	7.66695e-10
novel_mir2621	41	0	1.67	0.001	-10.7056	Down	3.56052e-10	7.66176e-10
novel_mir3499	41	0	1.67	0.001	-10.7056	Down	3.56052e-10	7.65657e-10
novel_mir4555	41	0	1.67	0.001	-10.7056	Down	3.56052e-10	7.65138e-10
novel_mir1389	41	0	1.67	0.001	-10.7056	Down	3.56052e-10	7.6462e-10
novel_mir3068	41	0	1.67	0.001	-10.7056	Down	3.56052e-10	7.64103e-10
mmu-miR-877-3p	41	0	1.67	0.001	-10.7056	Down	3.56052e-10	7.63587e-10
novel_mir1787	41	0	1.67	0.001	-10.7056	Down	3.56052e-10	7.63072e-10
novel_mir4755	41	0	1.67	0.001	-10.7056	Down	3.56052e-10	7.62557e-10
novel_mir2394	40	0	1.63	0.001	-10.6707	Down	6.07638e-10	1.2892e-09
novel_mir1206	40	0	1.63	0.001	-10.6707	Down	6.07638e-10	1.28834e-09
novel_mir5570	40	0	1.63	0.001	-10.6707	Down	6.07638e-10	1.28748e-09
novel_mir3682	40	0	1.63	0.001	-10.6707	Down	6.07638e-10	1.28662e-09
novel_mir4064	40	0	1.63	0.001	-10.6707	Down	6.07638e-10	1.28576e-09
novel_mir1841	40	0	1.63	0.001	-10.6707	Down	6.07638e-10	1.28491e-09
novel_mir2838	40	0	1.63	0.001	-10.6707	Down	6.07638e-10	1.28405e-09
novel_mir2208	40	0	1.63	0.001	-10.6707	Down	6.07638e-10	1.2832e-09
novel_mir1779	40	0	1.63	0.001	-10.6707	Down	6.07638e-10	1.28234e-09
mmu-miR-7091-3p	40	0	1.63	0.001	-10.6707	Down	6.07638e-10	1.28149e-09
novel_mir4136	40	0	1.63	0.001	-10.6707	Down	6.07638e-10	1.28064e-09
novel_mir2712	40	0	1.63	0.001	-10.6707	Down	6.07638e-10	1.27979e-09
novel_mir4814	40	0	1.63	0.001	-10.6707	Down	6.07638e-10	1.27894e-09
novel_mir1077	40	0	1.63	0.001	-10.6707	Down	6.07638e-10	1.27809e-09
novel_mir4840	40	0	1.63	0.001	-10.6707	Down	6.07638e-10	1.27725e-09
novel_mir3795	40	0	1.63	0.001	-10.6707	Down	6.07638e-10	1.2764e-09
novel_mir1302	40	0	1.63	0.001	-10.6707	Down	6.07638e-10	1.27556e-09
novel_mir4980	40	0	1.63	0.001	-10.6707	Down	6.07638e-10	1.27471e-09
novel_mir2516	40	0	1.63	0.001	-10.6707	Down	6.07638e-10	1.27387e-09
novel_mir3164	40	0	1.63	0.001	-10.6707	Down	6.07638e-10	1.27303e-09
novel_mir4984	40	0	1.63	0.001	-10.6707	Down	6.07638e-10	1.27219e-09
novel_mir2150	40	0	1.63	0.001	-10.6707	Down	6.07638e-10	1.27135e-09
novel_mir304	40	0	1.63	0.001	-10.6707	Down	6.07638e-10	1.27052e-09
novel_mir3242	40	0	1.63	0.001	-10.6707	Down	6.07638e-10	1.26968e-09
novel_mir4773	40	0	1.63	0.001	-10.6707	Down	6.07638e-10	1.26884e-09
novel_mir503	40	0	1.63	0.001	-10.6707	Down	6.07638e-10	1.26801e-09
novel_mir3322	40	0	1.63	0.001	-10.6707	Down	6.07638e-10	1.26718e-09
novel_mir134	39	0	1.59	0.001	-10.6348	Down	1.03699e-09	2.14985e-09
novel_mir6026	39	0	1.59	0.001	-10.6348	Down	1.03699e-09	2.14845e-09
novel_mir5500	39	0	1.59	0.001	-10.6348	Down	1.03699e-09	2.14704e-09
novel_mir1824	39	0	1.59	0.001	-10.6348	Down	1.03699e-09	2.14564e-09
novel_mir4087	39	0	1.59	0.001	-10.6348	Down	1.03699e-09	2.14425e-09
novel_mir4653	39	0	1.59	0.001	-10.6348	Down	1.03699e-09	2.14285e-09
mmu-miR-9-3p	39	0	1.59	0.001	-10.6348	Down	1.03699e-09	2.14146e-09
novel_mir645	39	0	1.59	0.001	-10.6348	Down	1.03699e-09	2.14006e-09
novel_mir1959	39	0	1.59	0.001	-10.6348	Down	1.03699e-09	2.13867e-09
novel_mir1213	39	0	1.59	0.001	-10.6348	Down	1.03699e-09	2.13729e-09
novel_mir450	39	0	1.59	0.001	-10.6348	Down	1.03699e-09	2.1359e-09
novel_mir251	39	0	1.59	0.001	-10.6348	Down	1.03699e-09	2.13451e-09
novel_mir801	39	0	1.59	0.001	-10.6348	Down	1.03699e-09	2.13313e-09
novel_mir1871	39	0	1.59	0.001	-10.6348	Down	1.03699e-09	2.13175e-09
novel_mir137	39	0	1.59	0.001	-10.6348	Down	1.03699e-09	2.13037e-09
novel_mir3163	39	0	1.59	0.001	-10.6348	Down	1.03699e-09	2.12899e-09
novel_mir2050	39	0	1.59	0.001	-10.6348	Down	1.03699e-09	2.12761e-09
novel_mir3137	39	0	1.59	0.001	-10.6348	Down	1.03699e-09	2.12624e-09
novel_mir1977	39	0	1.59	0.001	-10.6348	Down	1.03699e-09	2.12487e-09
novel_mir2540	39	0	1.59	0.001	-10.6348	Down	1.03699e-09	2.1235e-09
novel_mir3648	39	0	1.59	0.001	-10.6348	Down	1.03699e-09	2.12213e-09
novel_mir5692	39	0	1.59	0.001	-10.6348	Down	1.03699e-09	2.12076e-09
novel_mir4890	38	0	1.55	0.001	-10.5981	Down	1.76973e-09	3.58922e-09
novel_mir3471	38	0	1.55	0.001	-10.5981	Down	1.76973e-09	3.58693e-09
novel_mir3711	38	0	1.55	0.001	-10.5981	Down	1.76973e-09	3.58464e-09
novel_mir5587	38	0	1.55	0.001	-10.5981	Down	1.76973e-09	3.58235e-09
novel_mir5659	38	0	1.55	0.001	-10.5981	Down	1.76973e-09	3.58007e-09
novel_mir2663	38	0	1.55	0.001	-10.5981	Down	1.76973e-09	3.57779e-09
novel_mir5192	38	0	1.55	0.001	-10.5981	Down	1.76973e-09	3.57551e-09
novel_mir2053	38	0	1.55	0.001	-10.5981	Down	1.76973e-09	3.57324e-09
novel_mir3303	38	0	1.55	0.001	-10.5981	Down	1.76973e-09	3.57097e-09
novel_mir1001	38	0	1.55	0.001	-10.5981	Down	1.76973e-09	3.5687e-09
novel_mir1003	38	0	1.55	0.001	-10.5981	Down	1.76973e-09	3.56643e-09
novel_mir1861	38	0	1.55	0.001	-10.5981	Down	1.76973e-09	3.56417e-09
novel_mir3259	38	0	1.55	0.001	-10.5981	Down	1.76973e-09	3.56191e-09
novel_mir2711	38	0	1.55	0.001	-10.5981	Down	1.76973e-09	3.55965e-09
novel_mir1009	38	0	1.55	0.001	-10.5981	Down	1.76973e-09	3.5574e-09
novel_mir902	38	0	1.55	0.001	-10.5981	Down	1.76973e-09	3.55515e-09
novel_mir1078	38	0	1.55	0.001	-10.5981	Down	1.76973e-09	3.5529e-09
novel_mir3994	38	0	1.55	0.001	-10.5981	Down	1.76973e-09	3.55065e-09
novel_mir4375	38	0	1.55	0.001	-10.5981	Down	1.76973e-09	3.54841e-09
novel_mir155	38	0	1.55	0.001	-10.5981	Down	1.76973e-09	3.54617e-09
novel_mir5097	38	0	1.55	0.001	-10.5981	Down	1.76973e-09	3.54393e-09
novel_mir2920	38	0	1.55	0.001	-10.5981	Down	1.76973e-09	3.5417e-09
novel_mir191	38	0	1.55	0.001	-10.5981	Down	1.76973e-09	3.53946e-09
novel_mir4767	38	0	1.55	0.001	-10.5981	Down	1.76973e-09	3.53724e-09
novel_mir1890	38	0	1.55	0.001	-10.5981	Down	1.76973e-09	3.53501e-09
novel_mir6069	38	0	1.55	0.001	-10.5981	Down	1.76973e-09	3.53279e-09
novel_mir1288	38	0	1.55	0.001	-10.5981	Down	1.76973e-09	3.53057e-09
novel_mir5416	38	0	1.55	0.001	-10.5981	Down	1.76973e-09	3.52835e-09
novel_mir3893	38	0	1.55	0.001	-10.5981	Down	1.76973e-09	3.52613e-09
novel_mir2676	38	0	1.55	0.001	-10.5981	Down	1.76973e-09	3.52392e-09
novel_mir3690	38	0	1.55	0.001	-10.5981	Down	1.76973e-09	3.52171e-09
novel_mir4453	37	0	1.51	0.001	-10.5603	Down	3.02022e-09	5.99136e-09
novel_mir2507	37	0	1.51	0.001	-10.5603	Down	3.02022e-09	5.98762e-09
novel_mir4429	37	0	1.51	0.001	-10.5603	Down	3.02022e-09	5.98388e-09
novel_mir1831	37	0	1.51	0.001	-10.5603	Down	3.02022e-09	5.98015e-09
novel_mir5016	37	0	1.51	0.001	-10.5603	Down	3.02022e-09	5.97642e-09
novel_mir1373	37	0	1.51	0.001	-10.5603	Down	3.02022e-09	5.9727e-09
novel_mir289	37	0	1.51	0.001	-10.5603	Down	3.02022e-09	5.96898e-09
novel_mir623	37	0	1.51	0.001	-10.5603	Down	3.02022e-09	5.96526e-09
novel_mir3938	37	0	1.51	0.001	-10.5603	Down	3.02022e-09	5.96155e-09
novel_mir175	37	0	1.51	0.001	-10.5603	Down	3.02022e-09	5.95785e-09
novel_mir2407	37	0	1.51	0.001	-10.5603	Down	3.02022e-09	5.95415e-09
novel_mir4573	37	0	1.51	0.001	-10.5603	Down	3.02022e-09	5.95045e-09
novel_mir4204	37	0	1.51	0.001	-10.5603	Down	3.02022e-09	5.94676e-09
novel_mir5115	37	0	1.51	0.001	-10.5603	Down	3.02022e-09	5.94307e-09
novel_mir5410	37	0	1.51	0.001	-10.5603	Down	3.02022e-09	5.93939e-09
novel_mir502	37	0	1.51	0.001	-10.5603	Down	3.02022e-09	5.93571e-09
novel_mir1301	37	0	1.51	0.001	-10.5603	Down	3.02022e-09	5.93204e-09
novel_mir4686	37	0	1.51	0.001	-10.5603	Down	3.02022e-09	5.92837e-09
novel_mir3334	37	0	1.51	0.001	-10.5603	Down	3.02022e-09	5.92471e-09
novel_mir225	37	0	1.51	0.001	-10.5603	Down	3.02022e-09	5.92105e-09
novel_mir4807	37	0	1.51	0.001	-10.5603	Down	3.02022e-09	5.91739e-09
novel_mir1820	37	0	1.51	0.001	-10.5603	Down	3.02022e-09	5.91374e-09
novel_mir4489	37	0	1.51	0.001	-10.5603	Down	3.02022e-09	5.9101e-09
novel_mir3465	37	0	1.51	0.001	-10.5603	Down	3.02022e-09	5.90646e-09
novel_mir8	37	0	1.51	0.001	-10.5603	Down	3.02022e-09	5.90282e-09
novel_mir2080	37	0	1.51	0.001	-10.5603	Down	3.02022e-09	5.89919e-09
novel_mir1504	37	0	1.51	0.001	-10.5603	Down	3.02022e-09	5.89556e-09
novel_mir3486	36	0	1.47	0.001	-10.5216	Down	5.1543e-09	9.99374e-09
novel_mir47	36	0	1.47	0.001	-10.5216	Down	5.1543e-09	9.98764e-09
novel_mir5794	36	0	1.47	0.001	-10.5216	Down	5.1543e-09	9.98154e-09
novel_mir3910	36	0	1.47	0.001	-10.5216	Down	5.1543e-09	9.97546e-09
novel_mir5514	36	0	1.47	0.001	-10.5216	Down	5.1543e-09	9.96938e-09
novel_mir918	36	0	1.47	0.001	-10.5216	Down	5.1543e-09	9.96331e-09
novel_mir3037	36	0	1.47	0.001	-10.5216	Down	5.1543e-09	9.95724e-09
novel_mir3311	36	0	1.47	0.001	-10.5216	Down	5.1543e-09	9.95119e-09
novel_mir1495	36	0	1.47	0.001	-10.5216	Down	5.1543e-09	9.94514e-09
novel_mir2264	36	0	1.47	0.001	-10.5216	Down	5.1543e-09	9.93909e-09
novel_mir1088	36	0	1.47	0.001	-10.5216	Down	5.1543e-09	9.93306e-09
novel_mir4196	36	0	1.47	0.001	-10.5216	Down	5.1543e-09	9.92703e-09
novel_mir1324	36	0	1.47	0.001	-10.5216	Down	5.1543e-09	9.92101e-09
novel_mir1700	36	0	1.47	0.001	-10.5216	Down	5.1543e-09	9.915e-09
novel_mir5236	36	0	1.47	0.001	-10.5216	Down	5.1543e-09	9.90899e-09
novel_mir1311	36	0	1.47	0.001	-10.5216	Down	5.1543e-09	9.903e-09
novel_mir1065	36	0	1.47	0.001	-10.5216	Down	5.1543e-09	9.897e-09
novel_mir5551	36	0	1.47	0.001	-10.5216	Down	5.1543e-09	9.89102e-09
mmu-miR-12192-5p	36	0	1.47	0.001	-10.5216	Down	5.1543e-09	9.88504e-09
novel_mir549	36	0	1.47	0.001	-10.5216	Down	5.1543e-09	9.87907e-09
novel_mir457	36	0	1.47	0.001	-10.5216	Down	5.1543e-09	9.87311e-09
novel_mir5346	36	0	1.47	0.001	-10.5216	Down	5.1543e-09	9.86716e-09
novel_mir3123	36	0	1.47	0.001	-10.5216	Down	5.1543e-09	9.86121e-09
novel_mir6163	36	0	1.47	0.001	-10.5216	Down	5.1543e-09	9.85527e-09
novel_mir1209	36	0	1.47	0.001	-10.5216	Down	5.1543e-09	9.84934e-09
novel_mir217	36	0	1.47	0.001	-10.5216	Down	5.1543e-09	9.84341e-09
novel_mir3475	36	0	1.47	0.001	-10.5216	Down	5.1543e-09	9.83749e-09
novel_mir2734	36	0	1.47	0.001	-10.5216	Down	5.1543e-09	9.83158e-09
novel_mir898	36	0	1.47	0.001	-10.5216	Down	5.1543e-09	9.82567e-09
novel_mir1068	36	0	1.47	0.001	-10.5216	Down	5.1543e-09	9.81978e-09
novel_mir4728	36	0	1.47	0.001	-10.5216	Down	5.1543e-09	9.81389e-09
novel_mir1740	36	0	1.47	0.001	-10.5216	Down	5.1543e-09	9.808e-09
novel_mir270	36	0	1.47	0.001	-10.5216	Down	5.1543e-09	9.80213e-09
novel_mir199	35	0	1.43	0.001	-10.4818	Down	8.79634e-09	1.64912e-08
novel_mir1221	35	0	1.43	0.001	-10.4818	Down	8.79634e-09	1.64815e-08
novel_mir5520	35	0	1.43	0.001	-10.4818	Down	8.79634e-09	1.64717e-08
novel_mir1540	35	0	1.43	0.001	-10.4818	Down	8.79634e-09	1.6462e-08
novel_mir5322	35	0	1.43	0.001	-10.4818	Down	8.79634e-09	1.64523e-08
novel_mir3530	35	0	1.43	0.001	-10.4818	Down	8.79634e-09	1.64426e-08
novel_mir5527	35	0	1.43	0.001	-10.4818	Down	8.79634e-09	1.6433e-08
novel_mir2922	35	0	1.43	0.001	-10.4818	Down	8.79634e-09	1.64233e-08
novel_mir4846	35	0	1.43	0.001	-10.4818	Down	8.79634e-09	1.64136e-08
novel_mir821	35	0	1.43	0.001	-10.4818	Down	8.79634e-09	1.6404e-08
novel_mir3576	35	0	1.43	0.001	-10.4818	Down	8.79634e-09	1.63944e-08
novel_mir1047	35	0	1.43	0.001	-10.4818	Down	8.79634e-09	1.63847e-08
novel_mir5823	35	0	1.43	0.001	-10.4818	Down	8.79634e-09	1.63751e-08
novel_mir934	35	0	1.43	0.001	-10.4818	Down	8.79634e-09	1.63655e-08
novel_mir5031	35	0	1.43	0.001	-10.4818	Down	8.79634e-09	1.63559e-08
novel_mir1519	35	0	1.43	0.001	-10.4818	Down	8.79634e-09	1.63464e-08
novel_mir278	35	0	1.43	0.001	-10.4818	Down	8.79634e-09	1.63368e-08
novel_mir3787	35	0	1.43	0.001	-10.4818	Down	8.79634e-09	1.63272e-08
novel_mir4058	35	0	1.43	0.001	-10.4818	Down	8.79634e-09	1.63177e-08
novel_mir627	35	0	1.43	0.001	-10.4818	Down	8.79634e-09	1.63082e-08
novel_mir2993	35	0	1.43	0.001	-10.4818	Down	8.79634e-09	1.62986e-08
novel_mir5080	35	0	1.43	0.001	-10.4818	Down	8.79634e-09	1.62891e-08
novel_mir1217	35	0	1.43	0.001	-10.4818	Down	8.79634e-09	1.62796e-08
novel_mir4009	35	0	1.43	0.001	-10.4818	Down	8.79634e-09	1.62702e-08
novel_mir2182	35	0	1.43	0.001	-10.4818	Down	8.79634e-09	1.62607e-08
novel_mir3234	34	0	1.39	0.001	-10.4409	Down	1.50118e-08	2.76538e-08
novel_mir4831	34	0	1.39	0.001	-10.4409	Down	1.50118e-08	2.76377e-08
novel_mir5282	34	0	1.39	0.001	-10.4409	Down	1.50118e-08	2.76217e-08
novel_mir2698	34	0	1.39	0.001	-10.4409	Down	1.50118e-08	2.76057e-08
novel_mir4967	34	0	1.39	0.001	-10.4409	Down	1.50118e-08	2.75897e-08
novel_mir361	34	0	1.39	0.001	-10.4409	Down	1.50118e-08	2.75738e-08
novel_mir3552	34	0	1.39	0.001	-10.4409	Down	1.50118e-08	2.75578e-08
mmu-miR-138-1-3p	34	0	1.39	0.001	-10.4409	Down	1.50118e-08	2.75419e-08
novel_mir5125	34	0	1.39	0.001	-10.4409	Down	1.50118e-08	2.7526e-08
novel_mir4273	34	0	1.39	0.001	-10.4409	Down	1.50118e-08	2.75101e-08
novel_mir1270	34	0	1.39	0.001	-10.4409	Down	1.50118e-08	2.74942e-08
novel_mir601	34	0	1.39	0.001	-10.4409	Down	1.50118e-08	2.74783e-08
novel_mir2615	34	0	1.39	0.001	-10.4409	Down	1.50118e-08	2.74625e-08
novel_mir5464	34	0	1.39	0.001	-10.4409	Down	1.50118e-08	2.74467e-08
novel_mir5831	34	0	1.39	0.001	-10.4409	Down	1.50118e-08	2.74309e-08
novel_mir2851	34	0	1.39	0.001	-10.4409	Down	1.50118e-08	2.74151e-08
novel_mir2987	34	0	1.39	0.001	-10.4409	Down	1.50118e-08	2.73993e-08
novel_mir4312	34	0	1.39	0.001	-10.4409	Down	1.50118e-08	2.73836e-08
novel_mir1371	34	0	1.39	0.001	-10.4409	Down	1.50118e-08	2.73679e-08
mmu-miR-191-3p	34	0	1.39	0.001	-10.4409	Down	1.50118e-08	2.73522e-08
novel_mir1928	34	0	1.39	0.001	-10.4409	Down	1.50118e-08	2.73365e-08
novel_mir2234	34	0	1.39	0.001	-10.4409	Down	1.50118e-08	2.73208e-08
novel_mir4320	34	0	1.39	0.001	-10.4409	Down	1.50118e-08	2.73051e-08
novel_mir4113	34	0	1.39	0.001	-10.4409	Down	1.50118e-08	2.72895e-08
novel_mir269	34	0	1.39	0.001	-10.4409	Down	1.50118e-08	2.72739e-08
novel_mir4356	34	0	1.39	0.001	-10.4409	Down	1.50118e-08	2.72583e-08
novel_mir4245	34	0	1.39	0.001	-10.4409	Down	1.50118e-08	2.72427e-08
novel_mir3172	33	0	1.34	0.001	-10.388	Down	2.56192e-08	4.61233e-08
novel_mir421	33	0	1.34	0.001	-10.388	Down	2.56192e-08	4.60971e-08
novel_mir5529	33	0	1.34	0.001	-10.388	Down	2.56192e-08	4.6071e-08
novel_mir3443	33	0	1.34	0.001	-10.388	Down	2.56192e-08	4.60449e-08
novel_mir1441	33	0	1.34	0.001	-10.388	Down	2.56192e-08	4.60189e-08
novel_mir3528	33	0	1.34	0.001	-10.388	Down	2.56192e-08	4.59928e-08
novel_mir1095	33	0	1.34	0.001	-10.388	Down	2.56192e-08	4.59668e-08
novel_mir3574	33	0	1.34	0.001	-10.388	Down	2.56192e-08	4.59409e-08
novel_mir590	33	0	1.34	0.001	-10.388	Down	2.56192e-08	4.59149e-08
novel_mir396	33	0	1.34	0.001	-10.388	Down	2.56192e-08	4.5889e-08
novel_mir3953	33	0	1.34	0.001	-10.388	Down	2.56192e-08	4.58631e-08
novel_mir5855	33	0	1.34	0.001	-10.388	Down	2.56192e-08	4.58373e-08
novel_mir6031	33	0	1.34	0.001	-10.388	Down	2.56192e-08	4.58115e-08
novel_mir6083	33	0	1.34	0.001	-10.388	Down	2.56192e-08	4.57857e-08
novel_mir3317	33	0	1.34	0.001	-10.388	Down	2.56192e-08	4.57599e-08
novel_mir3950	33	0	1.34	0.001	-10.388	Down	2.56192e-08	4.57342e-08
novel_mir5278	33	0	1.34	0.001	-10.388	Down	2.56192e-08	4.57085e-08
novel_mir1748	33	0	1.34	0.001	-10.388	Down	2.56192e-08	4.56828e-08
novel_mir3862	33	0	1.34	0.001	-10.388	Down	2.56192e-08	4.56571e-08
novel_mir253	33	0	1.34	0.001	-10.388	Down	2.56192e-08	4.56315e-08
novel_mir6028	33	0	1.34	0.001	-10.388	Down	2.56192e-08	4.56059e-08
novel_mir2231	33	0	1.34	0.001	-10.388	Down	2.56192e-08	4.55803e-08
novel_mir1135	33	0	1.34	0.001	-10.388	Down	2.56192e-08	4.55548e-08
novel_mir2260	33	0	1.34	0.001	-10.388	Down	2.56192e-08	4.55293e-08
novel_mir4408	33	0	1.34	0.001	-10.388	Down	2.56192e-08	4.55038e-08
novel_mir4706	33	0	1.34	0.001	-10.388	Down	2.56192e-08	4.54784e-08
novel_mir779	33	0	1.34	0.001	-10.388	Down	2.56192e-08	4.5453e-08
novel_mir1084	33	0	1.34	0.001	-10.388	Down	2.56192e-08	4.54276e-08
novel_mir6025	32	0	1.3	0.001	-10.3443	Down	4.37216e-08	7.72245e-08
novel_mir1374	32	0	1.3	0.001	-10.3443	Down	4.37216e-08	7.71815e-08
novel_mir3339	32	0	1.3	0.001	-10.3443	Down	4.37216e-08	7.71386e-08
novel_mir2560	32	0	1.3	0.001	-10.3443	Down	4.37216e-08	7.70958e-08
novel_mir1621	32	0	1.3	0.001	-10.3443	Down	4.37216e-08	7.70529e-08
novel_mir2460	32	0	1.3	0.001	-10.3443	Down	4.37216e-08	7.70102e-08
novel_mir3813	32	0	1.3	0.001	-10.3443	Down	4.37216e-08	7.69675e-08
novel_mir5749	32	0	1.3	0.001	-10.3443	Down	4.37216e-08	7.69248e-08
novel_mir4907	32	0	1.3	0.001	-10.3443	Down	4.37216e-08	7.68822e-08
novel_mir2428	32	0	1.3	0.001	-10.3443	Down	4.37216e-08	7.68396e-08
novel_mir2705	32	0	1.3	0.001	-10.3443	Down	4.37216e-08	7.67971e-08
novel_mir4218	32	0	1.3	0.001	-10.3443	Down	4.37216e-08	7.67546e-08
novel_mir1827	32	0	1.3	0.001	-10.3443	Down	4.37216e-08	7.67122e-08
novel_mir4361	32	0	1.3	0.001	-10.3443	Down	4.37216e-08	7.66698e-08
novel_mir3120	32	0	1.3	0.001	-10.3443	Down	4.37216e-08	7.66275e-08
novel_mir1370	32	0	1.3	0.001	-10.3443	Down	4.37216e-08	7.65852e-08
novel_mir2773	32	0	1.3	0.001	-10.3443	Down	4.37216e-08	7.65429e-08
novel_mir5727	32	0	1.3	0.001	-10.3443	Down	4.37216e-08	7.65007e-08
novel_mir2593	32	0	1.3	0.001	-10.3443	Down	4.37216e-08	7.64586e-08
novel_mir2783	32	0	1.3	0.001	-10.3443	Down	4.37216e-08	7.64165e-08
novel_mir5004	32	0	1.3	0.001	-10.3443	Down	4.37216e-08	7.63744e-08
novel_mir4189	32	0	1.3	0.001	-10.3443	Down	4.37216e-08	7.63324e-08
novel_mir2527	32	0	1.3	0.001	-10.3443	Down	4.37216e-08	7.62905e-08
novel_mir1400	32	0	1.3	0.001	-10.3443	Down	4.37216e-08	7.62485e-08
novel_mir3789	32	0	1.3	0.001	-10.3443	Down	4.37216e-08	7.62067e-08
novel_mir1742	32	0	1.3	0.001	-10.3443	Down	4.37216e-08	7.61649e-08
novel_mir3521	32	0	1.3	0.001	-10.3443	Down	4.37216e-08	7.61231e-08
novel_mir3908	32	0	1.3	0.001	-10.3443	Down	4.37216e-08	7.60813e-08
novel_mir3786	32	0	1.3	0.001	-10.3443	Down	4.37216e-08	7.60396e-08
novel_mir3931	32	0	1.3	0.001	-10.3443	Down	4.37216e-08	7.5998e-08
novel_mir2545	32	0	1.3	0.001	-10.3443	Down	4.37216e-08	7.59564e-08
novel_mir5911	32	0	1.3	0.001	-10.3443	Down	4.37216e-08	7.59149e-08
novel_mir2358	32	0	1.3	0.001	-10.3443	Down	4.37216e-08	7.58734e-08
novel_mir4242	32	0	1.3	0.001	-10.3443	Down	4.37216e-08	7.58319e-08
novel_mir5641	32	0	1.3	0.001	-10.3443	Down	4.37216e-08	7.57905e-08
novel_mir2433	32	0	1.3	0.001	-10.3443	Down	4.37216e-08	7.57491e-08
novel_mir131	32	0	1.3	0.001	-10.3443	Down	4.37216e-08	7.57078e-08
mmu-miR-16-2-3p	32	0	1.3	0.001	-10.3443	Down	4.37216e-08	7.56665e-08
novel_mir2555	31	0	1.26	0.001	-10.2992	Down	7.46152e-08	1.28015e-07
novel_mir5330	31	0	1.26	0.001	-10.2992	Down	7.46152e-08	1.27946e-07
novel_mir2222	31	0	1.26	0.001	-10.2992	Down	7.46152e-08	1.27877e-07
novel_mir1691	31	0	1.26	0.001	-10.2992	Down	7.46152e-08	1.27808e-07
novel_mir205	31	0	1.26	0.001	-10.2992	Down	7.46152e-08	1.27739e-07
novel_mir5887	31	0	1.26	0.001	-10.2992	Down	7.46152e-08	1.2767e-07
novel_mir1463	31	0	1.26	0.001	-10.2992	Down	7.46152e-08	1.27602e-07
novel_mir3898	31	0	1.26	0.001	-10.2992	Down	7.46152e-08	1.27533e-07
novel_mir877	31	0	1.26	0.001	-10.2992	Down	7.46152e-08	1.27464e-07
novel_mir2443	31	0	1.26	0.001	-10.2992	Down	7.46152e-08	1.27396e-07
novel_mir1229	31	0	1.26	0.001	-10.2992	Down	7.46152e-08	1.27327e-07
novel_mir1357	31	0	1.26	0.001	-10.2992	Down	7.46152e-08	1.27259e-07
novel_mir1168	31	0	1.26	0.001	-10.2992	Down	7.46152e-08	1.2719e-07
novel_mir4345	31	0	1.26	0.001	-10.2992	Down	7.46152e-08	1.27122e-07
novel_mir5746	31	0	1.26	0.001	-10.2992	Down	7.46152e-08	1.27054e-07
novel_mir866	31	0	1.26	0.001	-10.2992	Down	7.46152e-08	1.26986e-07
novel_mir5713	31	0	1.26	0.001	-10.2992	Down	7.46152e-08	1.26918e-07
novel_mir3700	31	0	1.26	0.001	-10.2992	Down	7.46152e-08	1.2685e-07
novel_mir987	31	0	1.26	0.001	-10.2992	Down	7.46152e-08	1.26782e-07
novel_mir1249	31	0	1.26	0.001	-10.2992	Down	7.46152e-08	1.26714e-07
novel_mir2330	31	0	1.26	0.001	-10.2992	Down	7.46152e-08	1.26646e-07
novel_mir4828	31	0	1.26	0.001	-10.2992	Down	7.46152e-08	1.26579e-07
novel_mir2946	31	0	1.26	0.001	-10.2992	Down	7.46152e-08	1.26511e-07
novel_mir1073	31	0	1.26	0.001	-10.2992	Down	7.46152e-08	1.26443e-07
novel_mir1517	31	0	1.26	0.001	-10.2992	Down	7.46152e-08	1.26376e-07
novel_mir2562	31	0	1.26	0.001	-10.2992	Down	7.46152e-08	1.26309e-07
novel_mir599	31	0	1.26	0.001	-10.2992	Down	7.46152e-08	1.26241e-07
novel_mir2720	30	0	1.22	0.001	-10.2527	Down	1.27338e-07	2.1261e-07
novel_mir4073	30	0	1.22	0.001	-10.2527	Down	1.27338e-07	2.12498e-07
novel_mir1924	30	0	1.22	0.001	-10.2527	Down	1.27338e-07	2.12386e-07
novel_mir712	30	0	1.22	0.001	-10.2527	Down	1.27338e-07	2.12275e-07
novel_mir1275	30	0	1.22	0.001	-10.2527	Down	1.27338e-07	2.12163e-07
novel_mir4838	30	0	1.22	0.001	-10.2527	Down	1.27338e-07	2.12052e-07
novel_mir3705	30	0	1.22	0.001	-10.2527	Down	1.27338e-07	2.11941e-07
novel_mir3329	30	0	1.22	0.001	-10.2527	Down	1.27338e-07	2.1183e-07
novel_mir3159	30	0	1.22	0.001	-10.2527	Down	1.27338e-07	2.11719e-07
novel_mir5906	30	0	1.22	0.001	-10.2527	Down	1.27338e-07	2.11608e-07
novel_mir887	30	0	1.22	0.001	-10.2527	Down	1.27338e-07	2.11497e-07
novel_mir1791	30	0	1.22	0.001	-10.2527	Down	1.27338e-07	2.11386e-07
novel_mir1574	30	0	1.22	0.001	-10.2527	Down	1.27338e-07	2.11276e-07
novel_mir1050	30	0	1.22	0.001	-10.2527	Down	1.27338e-07	2.11166e-07
novel_mir4292	30	0	1.22	0.001	-10.2527	Down	1.27338e-07	2.11055e-07
novel_mir1884	30	0	1.22	0.001	-10.2527	Down	1.27338e-07	2.10945e-07
novel_mir2637	30	0	1.22	0.001	-10.2527	Down	1.27338e-07	2.10835e-07
novel_mir3566	30	0	1.22	0.001	-10.2527	Down	1.27338e-07	2.10725e-07
novel_mir90	30	0	1.22	0.001	-10.2527	Down	1.27338e-07	2.10615e-07
novel_mir3508	30	0	1.22	0.001	-10.2527	Down	1.27338e-07	2.10506e-07
novel_mir4521	30	0	1.22	0.001	-10.2527	Down	1.27338e-07	2.10396e-07
novel_mir3318	30	0	1.22	0.001	-10.2527	Down	1.27338e-07	2.10287e-07
novel_mir5886	30	0	1.22	0.001	-10.2527	Down	1.27338e-07	2.10177e-07
novel_mir4692	30	0	1.22	0.001	-10.2527	Down	1.27338e-07	2.10068e-07
novel_mir4894	30	0	1.22	0.001	-10.2527	Down	1.27338e-07	2.09959e-07
novel_mir2032	30	0	1.22	0.001	-10.2527	Down	1.27338e-07	2.0985e-07
novel_mir864	30	0	1.22	0.001	-10.2527	Down	1.27338e-07	2.09741e-07
novel_mir5344	30	0	1.22	0.001	-10.2527	Down	1.27338e-07	2.09632e-07
novel_mir1638	30	0	1.22	0.001	-10.2527	Down	1.27338e-07	2.09523e-07
novel_mir2548	30	0	1.22	0.001	-10.2527	Down	1.27338e-07	2.09415e-07
novel_mir4549	30	0	1.22	0.001	-10.2527	Down	1.27338e-07	2.09306e-07
novel_mir2377	30	0	1.22	0.001	-10.2527	Down	1.27338e-07	2.09198e-07
novel_mir2315	30	0	1.22	0.001	-10.2527	Down	1.27338e-07	2.0909e-07
novel_mir2279	30	0	1.22	0.001	-10.2527	Down	1.27338e-07	2.08982e-07
novel_mir5007	29	0	1.18	0.001	-10.2046	Down	2.17314e-07	3.56094e-07
novel_mir2145	29	0	1.18	0.001	-10.2046	Down	2.17314e-07	3.55911e-07
novel_mir5693	29	0	1.18	0.001	-10.2046	Down	2.17314e-07	3.55727e-07
novel_mir3698	29	0	1.18	0.001	-10.2046	Down	2.17314e-07	3.55544e-07
novel_mir3805	29	0	1.18	0.001	-10.2046	Down	2.17314e-07	3.5536e-07
novel_mir2243	29	0	1.18	0.001	-10.2046	Down	2.17314e-07	3.55177e-07
novel_mir2501	29	0	1.18	0.001	-10.2046	Down	2.17314e-07	3.54995e-07
novel_mir2155	29	0	1.18	0.001	-10.2046	Down	2.17314e-07	3.54812e-07
novel_mir184	29	0	1.18	0.001	-10.2046	Down	2.17314e-07	3.5463e-07
mmu-miR-6953-3p	29	0	1.18	0.001	-10.2046	Down	2.17314e-07	3.54447e-07
novel_mir791	29	0	1.18	0.001	-10.2046	Down	2.17314e-07	3.54265e-07
novel_mir775	29	0	1.18	0.001	-10.2046	Down	2.17314e-07	3.54083e-07
novel_mir4163	29	0	1.18	0.001	-10.2046	Down	2.17314e-07	3.53902e-07
novel_mir2530	29	0	1.18	0.001	-10.2046	Down	2.17314e-07	3.5372e-07
novel_mir4223	29	0	1.18	0.001	-10.2046	Down	2.17314e-07	3.53539e-07
novel_mir2129	29	0	1.18	0.001	-10.2046	Down	2.17314e-07	3.53358e-07
novel_mir2273	29	0	1.18	0.001	-10.2046	Down	2.17314e-07	3.53177e-07
novel_mir5227	29	0	1.18	0.001	-10.2046	Down	2.17314e-07	3.52996e-07
novel_mir509	29	0	1.18	0.001	-10.2046	Down	2.17314e-07	3.52816e-07
novel_mir2915	29	0	1.18	0.001	-10.2046	Down	2.17314e-07	3.52635e-07
novel_mir5916	29	0	1.18	0.001	-10.2046	Down	2.17314e-07	3.52455e-07
novel_mir2112	29	0	1.18	0.001	-10.2046	Down	2.17314e-07	3.52275e-07
novel_mir3852	29	0	1.18	0.001	-10.2046	Down	2.17314e-07	3.52095e-07
novel_mir210	29	0	1.18	0.001	-10.2046	Down	2.17314e-07	3.51916e-07
novel_mir1250	29	0	1.18	0.001	-10.2046	Down	2.17314e-07	3.51736e-07
novel_mir1066	29	0	1.18	0.001	-10.2046	Down	2.17314e-07	3.51557e-07
novel_mir1778	29	0	1.18	0.001	-10.2046	Down	2.17314e-07	3.51378e-07
novel_mir409	29	0	1.18	0.001	-10.2046	Down	2.17314e-07	3.51199e-07
novel_mir3611	29	0	1.18	0.001	-10.2046	Down	2.17314e-07	3.5102e-07
novel_mir5341	29	0	1.18	0.001	-10.2046	Down	2.17314e-07	3.50842e-07
novel_mir2310	29	0	1.18	0.001	-10.2046	Down	2.17314e-07	3.50663e-07
novel_mir3222	29	0	1.18	0.001	-10.2046	Down	2.17314e-07	3.50485e-07
novel_mir1993	29	0	1.18	0.001	-10.2046	Down	2.17314e-07	3.50307e-07
novel_mir2575	29	0	1.18	0.001	-10.2046	Down	2.17314e-07	3.50129e-07
novel_mir2852	29	0	1.18	0.001	-10.2046	Down	2.17314e-07	3.49952e-07
novel_mir4656	29	0	1.18	0.001	-10.2046	Down	2.17314e-07	3.49774e-07
novel_mir4371	29	0	1.18	0.001	-10.2046	Down	2.17314e-07	3.49597e-07
novel_mir146	29	0	1.18	0.001	-10.2046	Down	2.17314e-07	3.4942e-07
novel_mir4771	29	0	1.18	0.001	-10.2046	Down	2.17314e-07	3.49243e-07
novel_mir4027	29	0	1.18	0.001	-10.2046	Down	2.17314e-07	3.49066e-07
novel_mir4209	29	0	1.18	0.001	-10.2046	Down	2.17314e-07	3.4889e-07
novel_mir1482	29	0	1.18	0.001	-10.2046	Down	2.17314e-07	3.48713e-07
novel_mir3996	29	0	1.18	0.001	-10.2046	Down	2.17314e-07	3.48537e-07
novel_mir4660	29	0	1.18	0.001	-10.2046	Down	2.17314e-07	3.48361e-07
novel_mir3721	29	0	1.18	0.001	-10.2046	Down	2.17314e-07	3.48185e-07
novel_mir310	28	0	1.14	0.001	-10.1548	Down	3.7087e-07	5.8506e-07
novel_mir5310	28	0	1.14	0.001	-10.1548	Down	3.7087e-07	5.8477e-07
novel_mir1987	28	0	1.14	0.001	-10.1548	Down	3.7087e-07	5.84479e-07
novel_mir4759	28	0	1.14	0.001	-10.1548	Down	3.7087e-07	5.84189e-07
novel_mir1255	28	0	1.14	0.001	-10.1548	Down	3.7087e-07	5.83899e-07
novel_mir2452	28	0	1.14	0.001	-10.1548	Down	3.7087e-07	5.8361e-07
novel_mir5678	28	0	1.14	0.001	-10.1548	Down	3.7087e-07	5.83321e-07
novel_mir3262	28	0	1.14	0.001	-10.1548	Down	3.7087e-07	5.83032e-07
novel_mir2223	28	0	1.14	0.001	-10.1548	Down	3.7087e-07	5.82743e-07
novel_mir3337	28	0	1.14	0.001	-10.1548	Down	3.7087e-07	5.82455e-07
novel_mir213	28	0	1.14	0.001	-10.1548	Down	3.7087e-07	5.82167e-07
novel_mir4995	28	0	1.14	0.001	-10.1548	Down	3.7087e-07	5.81879e-07
novel_mir2577	28	0	1.14	0.001	-10.1548	Down	3.7087e-07	5.81592e-07
novel_mir321	28	0	1.14	0.001	-10.1548	Down	3.7087e-07	5.81304e-07
novel_mir602	28	0	1.14	0.001	-10.1548	Down	3.7087e-07	5.81017e-07
novel_mir4114	28	0	1.14	0.001	-10.1548	Down	3.7087e-07	5.80731e-07
novel_mir1985	28	0	1.14	0.001	-10.1548	Down	3.7087e-07	5.80444e-07
novel_mir157	28	0	1.14	0.001	-10.1548	Down	3.7087e-07	5.80158e-07
novel_mir2868	28	0	1.14	0.001	-10.1548	Down	3.7087e-07	5.79873e-07
novel_mir1995	28	0	1.14	0.001	-10.1548	Down	3.7087e-07	5.79587e-07
novel_mir1795	28	0	1.14	0.001	-10.1548	Down	3.7087e-07	5.79302e-07
novel_mir655	28	0	1.14	0.001	-10.1548	Down	3.7087e-07	5.79017e-07
novel_mir1583	28	0	1.14	0.001	-10.1548	Down	3.7087e-07	5.78732e-07
novel_mir3340	28	0	1.14	0.001	-10.1548	Down	3.7087e-07	5.78448e-07
novel_mir4229	28	0	1.14	0.001	-10.1548	Down	3.7087e-07	5.78164e-07
novel_mir969	28	0	1.14	0.001	-10.1548	Down	3.7087e-07	5.7788e-07
novel_mir2392	28	0	1.14	0.001	-10.1548	Down	3.7087e-07	5.77596e-07
novel_mir1131	28	0	1.14	0.001	-10.1548	Down	3.7087e-07	5.77313e-07
novel_mir443	28	0	1.14	0.001	-10.1548	Down	3.7087e-07	5.7703e-07
novel_mir21	28	0	1.14	0.001	-10.1548	Down	3.7087e-07	5.76747e-07
novel_mir2015	28	0	1.14	0.001	-10.1548	Down	3.7087e-07	5.76465e-07
mmu-miR-7043-3p	28	0	1.14	0.001	-10.1548	Down	3.7087e-07	5.76183e-07
novel_mir4632	28	0	1.14	0.001	-10.1548	Down	3.7087e-07	5.75901e-07
novel_mir5027	27	0	1.1	0.001	-10.1033	Down	6.32926e-07	9.69082e-07
novel_mir5062	27	0	1.1	0.001	-10.1033	Down	6.32926e-07	9.68615e-07
novel_mir487	27	0	1.1	0.001	-10.1033	Down	6.32926e-07	9.68148e-07
mmu-miR-5114	27	0	1.1	0.001	-10.1033	Down	6.32926e-07	9.67682e-07
novel_mir3766	27	0	1.1	0.001	-10.1033	Down	6.32926e-07	9.67216e-07
novel_mir2265	27	0	1.1	0.001	-10.1033	Down	6.32926e-07	9.6675e-07
novel_mir2068	27	0	1.1	0.001	-10.1033	Down	6.32926e-07	9.66285e-07
novel_mir4582	27	0	1.1	0.001	-10.1033	Down	6.32926e-07	9.65821e-07
novel_mir594	27	0	1.1	0.001	-10.1033	Down	6.32926e-07	9.65357e-07
novel_mir1576	27	0	1.1	0.001	-10.1033	Down	6.32926e-07	9.64893e-07
novel_mir1253	27	0	1.1	0.001	-10.1033	Down	6.32926e-07	9.6443e-07
novel_mir366	27	0	1.1	0.001	-10.1033	Down	6.32926e-07	9.63967e-07
novel_mir3409	27	0	1.1	0.001	-10.1033	Down	6.32926e-07	9.63505e-07
novel_mir3388	27	0	1.1	0.001	-10.1033	Down	6.32926e-07	9.63043e-07
novel_mir3538	27	0	1.1	0.001	-10.1033	Down	6.32926e-07	9.62581e-07
novel_mir2110	27	0	1.1	0.001	-10.1033	Down	6.32926e-07	9.6212e-07
novel_mir283	27	0	1.1	0.001	-10.1033	Down	6.32926e-07	9.6166e-07
novel_mir89	27	0	1.1	0.001	-10.1033	Down	6.32926e-07	9.612e-07
novel_mir4514	27	0	1.1	0.001	-10.1033	Down	6.32926e-07	9.6074e-07
novel_mir3726	27	0	1.1	0.001	-10.1033	Down	6.32926e-07	9.60281e-07
novel_mir2001	27	0	1.1	0.001	-10.1033	Down	6.32926e-07	9.59822e-07
novel_mir4973	27	0	1.1	0.001	-10.1033	Down	6.32926e-07	9.59363e-07
novel_mir4400	27	0	1.1	0.001	-10.1033	Down	6.32926e-07	9.58906e-07
novel_mir1509	27	0	1.1	0.001	-10.1033	Down	6.32926e-07	9.58448e-07
novel_mir4855	27	0	1.1	0.001	-10.1033	Down	6.32926e-07	9.57991e-07
novel_mir970	27	0	1.1	0.001	-10.1033	Down	6.32926e-07	9.57534e-07
novel_mir719	27	0	1.1	0.001	-10.1033	Down	6.32926e-07	9.57078e-07
novel_mir1451	27	0	1.1	0.001	-10.1033	Down	6.32926e-07	9.56622e-07
novel_mir3316	27	0	1.1	0.001	-10.1033	Down	6.32926e-07	9.56167e-07
novel_mir4111	27	0	1.1	0.001	-10.1033	Down	6.32926e-07	9.55712e-07
novel_mir1237	27	0	1.1	0.001	-10.1033	Down	6.32926e-07	9.55258e-07
novel_mir4991	27	0	1.1	0.001	-10.1033	Down	6.32926e-07	9.54804e-07
novel_mir4680	27	0	1.1	0.001	-10.1033	Down	6.32926e-07	9.5435e-07
novel_mir1518	27	0	1.1	0.001	-10.1033	Down	6.32926e-07	9.53897e-07
novel_mir1472	27	0	1.1	0.001	-10.1033	Down	6.32926e-07	9.53444e-07
novel_mir5761	27	0	1.1	0.001	-10.1033	Down	6.32926e-07	9.52992e-07
novel_mir3604	27	0	1.1	0.001	-10.1033	Down	6.32926e-07	9.5254e-07
novel_mir2376	27	0	1.1	0.001	-10.1033	Down	6.32926e-07	9.52089e-07
novel_mir5053	27	0	1.1	0.001	-10.1033	Down	6.32926e-07	9.51638e-07
novel_mir540	27	0	1.1	0.001	-10.1033	Down	6.32926e-07	9.51187e-07
novel_mir4975	27	0	1.1	0.001	-10.1033	Down	6.32926e-07	9.50737e-07
novel_mir4386	26	0	1.06	0.001	-10.0498	Down	1.08015e-06	1.61946e-06
novel_mir2717	26	0	1.06	0.001	-10.0498	Down	1.08015e-06	1.6187e-06
[truncated: 671 more rows]

## Sheet: normal control vs fruit juice
miRNA id	Count(JK5)	Count(JN1)	TPM(JK5)	TPM(JN1)	log2 Ratio(JN1/JK5)	Up-Down-Regulation(JN1/JK5)	P-value	FDR
novel_mir4385	0	1210	0.001	42.88	15.388	Up	0	0
novel_mir2860	0	851	0.001	30.16	14.8803	Up	5.86224e-232	2.54838e-230
novel_mir4850	0	834	0.001	29.55	14.8509	Up	2.4426e-227	1.04179e-225
novel_mir4889	0	650	0.001	23.03	14.4912	Up	2.45628e-177	8.6084e-176
novel_mir2845	0	616	0.001	21.83	14.414	Up	4.26438e-168	1.41759e-166
novel_mir349	0	512	0.001	18.14	14.1469	Up	7.80002e-140	2.1903e-138
novel_mir2235	0	501	0.001	17.75	14.1155	Up	7.60976e-137	2.08507e-135
novel_mir2088	0	479	0.001	16.97	14.0507	Up	7.24306e-131	1.87119e-129
novel_mir277	0	461	0.001	16.34	13.9961	Up	5.6424e-126	1.4251e-124
novel_mir49	0	459	0.001	16.27	13.9899	Up	1.97228e-125	4.9537e-124
novel_mir5383	0	456	0.001	16.16	13.9801	Up	1.28892e-124	3.18426e-123
novel_mir4464	0	431	0.001	15.27	13.8984	Up	8.01738e-118	1.90771e-116
novel_mir2172	0	430	0.001	15.24	13.8956	Up	1.49894e-117	3.54802e-116
novel_mir5501	0	426	0.001	15.1	13.8823	Up	1.83145e-116	4.31249e-115
novel_mir2412	0	425	0.001	15.06	13.8784	Up	3.4241e-116	8.02091e-115
novel_mir2970	0	417	0.001	14.78	13.8514	Up	5.1117e-114	1.1731e-112
novel_mir3228	0	414	0.001	14.67	13.8406	Up	3.34058e-113	7.55138e-112
novel_mir755	0	399	0.001	14.14	13.7875	Up	3.98204e-109	8.61378e-108
novel_mir3161	0	396	0.001	14.03	13.7762	Up	2.60234e-108	5.60247e-107
novel_mir371	0	389	0.001	13.78	13.7503	Up	2.07792e-106	4.41046e-105
novel_mir1360	0	380	0.001	13.47	13.7175	Up	5.79964e-104	1.21954e-102
novel_mir2832	0	377	0.001	13.36	13.7056	Up	3.79016e-103	7.82434e-102
novel_mir530	0	372	0.001	13.18	13.6861	Up	8.65802e-102	1.75529e-100
novel_mir403	0	372	0.001	13.18	13.6861	Up	8.65802e-102	1.74745e-100
novel_mir1940	0	368	0.001	13.04	13.6707	Up	1.05786e-100	2.12559e-99
novel_mir6013	0	359	0.001	12.72	13.6348	Up	2.95256e-98	5.85462e-97
mmu-miR-378b	0	354	0.001	12.54	13.6142	Up	6.74466e-97	1.32003e-95
novel_mir1790	0	350	0.001	12.4	13.5981	Up	8.2408e-96	1.57201e-94
novel_mir4996	0	347	0.001	12.3	13.5864	Up	5.3855e-95	1.02302e-93
novel_mir2719	0	347	0.001	12.3	13.5864	Up	5.3855e-95	1.01874e-93
novel_mir2239	0	346	0.001	12.26	13.5817	Up	1.00688e-94	1.89672e-93
novel_mir2161	0	343	0.001	12.15	13.5687	Up	6.58016e-94	1.22929e-92
novel_mir5771	0	343	0.001	12.15	13.5687	Up	6.58016e-94	1.22423e-92
novel_mir4154	0	340	0.001	12.05	13.5567	Up	4.30024e-93	7.96778e-92
novel_mir3965	0	339	0.001	12.01	13.5519	Up	8.0398e-93	1.48359e-91
novel_mir5057	0	325	0.001	11.52	13.4919	Up	5.12598e-89	9.1599e-88
novel_mir1032	0	325	0.001	11.52	13.4919	Up	5.12598e-89	9.12384e-88
novel_mir4397	0	325	0.001	11.52	13.4919	Up	5.12598e-89	9.08806e-88
novel_mir688	0	322	0.001	11.41	13.478	Up	3.34992e-88	5.91601e-87
novel_mir2034	0	321	0.001	11.38	13.4742	Up	6.26306e-88	1.09749e-86
novel_mir1158	0	319	0.001	11.3	13.464	Up	2.18922e-87	3.80672e-86
novel_mir1303	0	319	0.001	11.3	13.464	Up	2.18922e-87	3.79213e-86
novel_mir576	0	314	0.001	11.13	13.4422	Up	5.00096e-86	8.49975e-85
novel_mir2055	0	308	0.001	10.91	13.4134	Up	2.13584e-84	3.58964e-83
novel_mir18	0	308	0.001	10.91	13.4134	Up	2.13584e-84	3.57635e-83
novel_mir4942	0	298	0.001	10.56	13.3663	Up	1.11453e-81	1.81905e-80
novel_mir5067	0	294	0.001	10.42	13.3471	Up	1.36176e-80	2.19875e-79
novel_mir5994	0	293	0.001	10.38	13.3415	Up	2.54596e-80	4.09619e-79
novel_mir5755	0	287	0.001	10.17	13.312	Up	1.08734e-78	1.71883e-77
novel_mir3650	0	287	0.001	10.17	13.312	Up	1.08734e-78	1.71284e-77
novel_mir5081	0	287	0.001	10.17	13.312	Up	1.08734e-78	1.7069e-77
novel_mir5783	0	280	0.001	9.92	13.2761	Up	8.68224e-77	1.33059e-75
novel_mir5957	0	280	0.001	9.92	13.2761	Up	8.68224e-77	1.32609e-75
novel_mir3687	0	279	0.001	9.89	13.2718	Up	1.62324e-76	2.47094e-75
novel_mir4065	0	279	0.001	9.89	13.2718	Up	1.62324e-76	2.46265e-75
novel_mir3084	0	277	0.001	9.82	13.2615	Up	5.67398e-76	8.55069e-75
novel_mir5589	0	273	0.001	9.67	13.2393	Up	6.93262e-75	1.0344e-73
novel_mir5642	0	270	0.001	9.57	13.2243	Up	4.53058e-74	6.71566e-73
novel_mir75	0	267	0.001	9.46	13.2076	Up	2.96082e-73	4.332e-72
novel_mir6045	0	263	0.001	9.32	13.1861	Up	3.6176e-72	5.22529e-71
novel_mir1826	0	260	0.001	9.21	13.169	Up	2.36416e-71	3.38239e-70
novel_mir5398	0	258	0.001	9.14	13.158	Up	8.26384e-71	1.17119e-69
novel_mir5738	0	258	0.001	9.14	13.158	Up	8.26384e-71	1.16753e-69
novel_mir1336	0	257	0.001	9.11	13.1532	Up	1.54502e-70	2.16927e-69
novel_mir4022	0	252	0.001	8.93	13.1244	Up	3.52936e-69	4.8061e-68
novel_mir72	0	252	0.001	8.93	13.1244	Up	3.52936e-69	4.79166e-68
novel_mir4799	0	251	0.001	8.89	13.118	Up	6.59854e-69	8.90507e-68
novel_mir2168	0	248	0.001	8.79	13.1016	Up	4.31226e-68	5.78508e-67
novel_mir5281	0	247	0.001	8.75	13.0951	Up	8.06228e-68	1.07839e-66
novel_mir4719	0	247	0.001	8.75	13.0951	Up	8.06228e-68	1.07521e-66
novel_mir4263	0	246	0.001	8.72	13.0901	Up	1.50734e-67	2.00431e-66
novel_mir516	0	245	0.001	8.68	13.0835	Up	2.81814e-67	3.73631e-66
novel_mir1166	0	240	0.001	8.5	13.0532	Up	6.4376e-66	8.46058e-65
novel_mir242	0	238	0.001	8.43	13.0413	Up	2.25024e-65	2.94879e-64
novel_mir6046	0	238	0.001	8.43	13.0413	Up	2.25024e-65	2.94027e-64
mmu-miR-28a-5p	0	237	0.001	8.4	13.0362	Up	4.20708e-65	5.46558e-64
novel_mir3210	0	236	0.001	8.36	13.0293	Up	7.86562e-65	1.01892e-63
novel_mir1036	0	234	0.001	8.29	13.0172	Up	2.7494e-64	3.55144e-63
novel_mir704	0	232	0.001	8.22	13.0049	Up	9.61042e-64	1.23785e-62
novel_mir3098	0	232	0.001	8.22	13.0049	Up	9.61042e-64	1.23434e-62
novel_mir869	0	231	0.001	8.19	12.9996	Up	1.79678e-63	2.28823e-62
novel_mir4046	0	226	0.001	8.01	12.9676	Up	4.10446e-62	5.14024e-61
novel_mir4211	0	225	0.001	7.97	12.9604	Up	7.67376e-62	9.55732e-61
novel_mir5359	0	221	0.001	7.83	12.9348	Up	9.376e-61	1.15501e-59
novel_mir2913	0	221	0.001	7.83	12.9348	Up	9.376e-61	1.15187e-59
novel_mir3533	0	220	0.001	7.8	12.9293	Up	1.75295e-60	2.14192e-59
novel_mir4336	0	219	0.001	7.76	12.9218	Up	3.27734e-60	3.99376e-59
novel_mir4920	0	218	0.001	7.73	12.9163	Up	6.12738e-60	7.44674e-59
novel_mir941	0	218	0.001	7.73	12.9163	Up	6.12738e-60	7.42678e-59
novel_mir846	0	218	0.001	7.73	12.9163	Up	6.12738e-60	7.40692e-59
novel_mir5824	0	215	0.001	7.62	12.8956	Up	4.00434e-59	4.78932e-58
novel_mir2914	0	215	0.001	7.62	12.8956	Up	4.00434e-59	4.77668e-58
novel_mir3015	0	213	0.001	7.55	12.8823	Up	1.3997e-58	1.66091e-57
novel_mir3899	0	212	0.001	7.51	12.8746	Up	2.6169e-58	3.08099e-57
novel_mir2337	0	210	0.001	7.44	12.8611	Up	9.1473e-58	1.0686e-56
novel_mir4194	0	209	0.001	7.41	12.8553	Up	1.71019e-57	1.98761e-56
novel_mir4532	0	209	0.001	7.41	12.8553	Up	1.71019e-57	1.98251e-56
novel_mir1549	0	208	0.001	7.37	12.8474	Up	3.1974e-57	3.69704e-56
novel_mir4402	0	207	0.001	7.34	12.8416	Up	5.97792e-57	6.89443e-56
novel_mir79	0	206	0.001	7.3	12.8337	Up	1.11764e-56	1.27597e-55
novel_mir2818	0	205	0.001	7.26	12.8258	Up	2.08956e-56	2.36764e-55
novel_mir422	0	204	0.001	7.23	12.8198	Up	3.90668e-56	4.37181e-55
novel_mir2107	0	203	0.001	7.19	12.8118	Up	7.30398e-56	8.13332e-55
novel_mir2754	0	200	0.001	7.09	12.7916	Up	4.77328e-55	5.25061e-54
novel_mir4051	0	200	0.001	7.09	12.7916	Up	4.77328e-55	5.23786e-54
novel_mir1447	0	200	0.001	7.09	12.7916	Up	4.77328e-55	5.22518e-54
novel_mir2706	0	199	0.001	7.05	12.7834	Up	8.92418e-55	9.72198e-54
novel_mir3781	0	199	0.001	7.05	12.7834	Up	8.92418e-55	9.69861e-54
novel_mir5536	0	198	0.001	7.02	12.7773	Up	1.66848e-54	1.80892e-53
novel_mir1384	0	198	0.001	7.02	12.7773	Up	1.66848e-54	1.80459e-53
novel_mir377	0	197	0.001	6.98	12.769	Up	3.11942e-54	3.34986e-53
novel_mir5998	0	197	0.001	6.98	12.769	Up	3.11942e-54	3.34192e-53
novel_mir2089	0	196	0.001	6.95	12.7628	Up	5.8321e-54	6.23332e-53
novel_mir5499	0	196	0.001	6.95	12.7628	Up	5.8321e-54	6.21861e-53
novel_mir1622	0	194	0.001	6.87	12.7461	Up	2.03858e-53	2.15841e-52
novel_mir317	0	193	0.001	6.84	12.7398	Up	3.81138e-53	4.00727e-52
novel_mir1245	0	190	0.001	6.73	12.7164	Up	2.4908e-52	2.60669e-51
novel_mir2969	0	189	0.001	6.7	12.7099	Up	4.65684e-52	4.8399e-51
novel_mir1183	0	189	0.001	6.7	12.7099	Up	4.65684e-52	4.8288e-51
novel_mir843	0	188	0.001	6.66	12.7013	Up	8.7065e-52	9.00734e-51
novel_mir1350	0	188	0.001	6.66	12.7013	Up	8.7065e-52	8.98678e-51
novel_mir1407	0	187	0.001	6.63	12.6948	Up	1.62778e-51	1.67636e-50
novel_mir3655	0	187	0.001	6.63	12.6948	Up	1.62778e-51	1.67255e-50
novel_mir4257	0	187	0.001	6.63	12.6948	Up	1.62778e-51	1.66875e-50
novel_mir369	0	187	0.001	6.63	12.6948	Up	1.62778e-51	1.66498e-50
novel_mir280	0	185	0.001	6.56	12.6795	Up	5.68984e-51	5.78062e-50
novel_mir192	0	185	0.001	6.56	12.6795	Up	5.68984e-51	5.76766e-50
novel_mir5459	0	183	0.001	6.48	12.6618	Up	1.98886e-50	1.99815e-49
novel_mir5864	0	183	0.001	6.48	12.6618	Up	1.98886e-50	1.99371e-49
novel_mir2312	0	181	0.001	6.41	12.6461	Up	6.952e-50	6.92291e-49
novel_mir2187	0	180	0.001	6.38	12.6393	Up	1.29976e-49	1.28864e-48
novel_mir4232	0	180	0.001	6.38	12.6393	Up	1.29976e-49	1.28582e-48
novel_mir1747	0	179	0.001	6.34	12.6303	Up	2.43004e-49	2.38313e-48
novel_mir4572	0	176	0.001	6.24	12.6073	Up	1.58808e-48	1.54071e-47
novel_mir1285	0	176	0.001	6.24	12.6073	Up	1.58808e-48	1.53741e-47
novel_mir390	0	176	0.001	6.24	12.6073	Up	1.58808e-48	1.53412e-47
novel_mir797	0	176	0.001	6.24	12.6073	Up	1.58808e-48	1.53085e-47
novel_mir2505	0	176	0.001	6.24	12.6073	Up	1.58808e-48	1.52759e-47
novel_mir1156	0	176	0.001	6.24	12.6073	Up	1.58808e-48	1.52435e-47
novel_mir3455	0	175	0.001	6.2	12.5981	Up	2.9691e-48	2.83791e-47
novel_mir539	0	175	0.001	6.2	12.5981	Up	2.9691e-48	2.83192e-47
novel_mir5019	0	175	0.001	6.2	12.5981	Up	2.9691e-48	2.82596e-47
novel_mir799	0	175	0.001	6.2	12.5981	Up	2.9691e-48	2.82002e-47
novel_mir1152	0	174	0.001	6.17	12.5911	Up	5.55106e-48	5.25028e-47
novel_mir4547	0	173	0.001	6.13	12.5817	Up	1.03784e-47	9.79553e-47
novel_mir716	0	173	0.001	6.13	12.5817	Up	1.03784e-47	9.77512e-47
novel_mir2019	0	172	0.001	6.1	12.5746	Up	1.94035e-47	1.82377e-46
novel_mir3273	0	172	0.001	6.1	12.5746	Up	1.94035e-47	1.81999e-46
novel_mir326	0	172	0.001	6.1	12.5746	Up	1.94035e-47	1.81622e-46
novel_mir4729	0	172	0.001	6.1	12.5746	Up	1.94035e-47	1.81247e-46
novel_mir586	0	171	0.001	6.06	12.5651	Up	3.62772e-47	3.36084e-46
novel_mir5271	0	171	0.001	6.06	12.5651	Up	3.62772e-47	3.35397e-46
novel_mir4259	0	171	0.001	6.06	12.5651	Up	3.62772e-47	3.34713e-46
novel_mir387	0	171	0.001	6.06	12.5651	Up	3.62772e-47	3.34031e-46
novel_mir6059	0	171	0.001	6.06	12.5651	Up	3.62772e-47	3.33352e-46
novel_mir231	0	170	0.001	6.02	12.5555	Up	6.78242e-47	6.21974e-46
novel_mir1120	0	170	0.001	6.02	12.5555	Up	6.78242e-47	6.20715e-46
novel_mir2565	0	169	0.001	5.99	12.5483	Up	1.26805e-46	1.15816e-45
novel_mir4295	0	168	0.001	5.95	12.5387	Up	2.37078e-46	2.1566e-45
novel_mir713	0	168	0.001	5.95	12.5387	Up	2.37078e-46	2.15227e-45
novel_mir1097	0	168	0.001	5.95	12.5387	Up	2.37078e-46	2.14796e-45
novel_mir203	0	167	0.001	5.92	12.5314	Up	4.43244e-46	3.99981e-45
novel_mir2459	0	167	0.001	5.92	12.5314	Up	4.43244e-46	3.99184e-45
novel_mir2620	0	167	0.001	5.92	12.5314	Up	4.43244e-46	3.98391e-45
novel_mir2971	0	167	0.001	5.92	12.5314	Up	4.43244e-46	3.976e-45
novel_mir5350	0	166	0.001	5.88	12.5216	Up	8.28694e-46	7.36056e-45
novel_mir1405	0	166	0.001	5.88	12.5216	Up	8.28694e-46	7.34613e-45
novel_mir4987	0	166	0.001	5.88	12.5216	Up	8.28694e-46	7.33175e-45
novel_mir5473	0	166	0.001	5.88	12.5216	Up	8.28694e-46	7.31743e-45
novel_mir1664	0	165	0.001	5.85	12.5142	Up	1.54934e-45	1.36541e-44
novel_mir663	0	165	0.001	5.85	12.5142	Up	1.54934e-45	1.36276e-44
novel_mir2305	0	165	0.001	5.85	12.5142	Up	1.54934e-45	1.36011e-44
novel_mir5669	0	165	0.001	5.85	12.5142	Up	1.54934e-45	1.35747e-44
novel_mir2454	0	164	0.001	5.81	12.5043	Up	2.89668e-45	2.52816e-44
novel_mir3905	0	164	0.001	5.81	12.5043	Up	2.89668e-45	2.52329e-44
novel_mir1760	0	163	0.001	5.78	12.4969	Up	5.41566e-45	4.69946e-44
novel_mir1907	0	162	0.001	5.74	12.4868	Up	1.01252e-44	8.75259e-44
novel_mir45	0	162	0.001	5.74	12.4868	Up	1.01252e-44	8.73588e-44
novel_mir5486	0	162	0.001	5.74	12.4868	Up	1.01252e-44	8.71924e-44
novel_mir5099	0	162	0.001	5.74	12.4868	Up	1.01252e-44	8.70267e-44
novel_mir1005	0	161	0.001	5.71	12.4793	Up	1.89302e-44	1.60871e-43
novel_mir4021	0	161	0.001	5.71	12.4793	Up	1.89302e-44	1.6057e-43
novel_mir759	0	160	0.001	5.67	12.4691	Up	3.53922e-44	2.98523e-43
novel_mir2962	0	160	0.001	5.67	12.4691	Up	3.53922e-44	2.97967e-43
novel_mir5639	0	160	0.001	5.67	12.4691	Up	3.53922e-44	2.97413e-43
novel_mir372	0	160	0.001	5.67	12.4691	Up	3.53922e-44	2.96861e-43
novel_mir1723	0	160	0.001	5.67	12.4691	Up	3.53922e-44	2.96311e-43
novel_mir73	0	159	0.001	5.63	12.4589	Up	6.617e-44	5.50929e-43
novel_mir1844	0	158	0.001	5.6	12.4512	Up	1.23712e-43	1.02813e-42
novel_mir1860	0	158	0.001	5.6	12.4512	Up	1.23712e-43	1.02625e-42
novel_mir806	0	158	0.001	5.6	12.4512	Up	1.23712e-43	1.02437e-42
novel_mir2396	0	158	0.001	5.6	12.4512	Up	1.23712e-43	1.02249e-42
novel_mir3036	0	157	0.001	5.56	12.4409	Up	2.31294e-43	1.90124e-42
novel_mir3415	0	157	0.001	5.56	12.4409	Up	2.31294e-43	1.89779e-42
novel_mir4635	0	156	0.001	5.53	12.4331	Up	4.32432e-43	3.54171e-42
novel_mir30	0	156	0.001	5.53	12.4331	Up	4.32432e-43	3.53531e-42
novel_mir5995	0	156	0.001	5.53	12.4331	Up	4.32432e-43	3.52893e-42
novel_mir1435	0	155	0.001	5.49	12.4226	Up	8.08482e-43	6.5622e-42
novel_mir5562	0	155	0.001	5.49	12.4226	Up	8.08482e-43	6.55044e-42
novel_mir386	0	155	0.001	5.49	12.4226	Up	8.08482e-43	6.53872e-42
novel_mir5142	0	154	0.001	5.46	12.4147	Up	1.51155e-42	1.2138e-41
novel_mir1034	0	154	0.001	5.46	12.4147	Up	1.51155e-42	1.21165e-41
novel_mir2368	0	154	0.001	5.46	12.4147	Up	1.51155e-42	1.20951e-41
novel_mir4558	0	153	0.001	5.42	12.4041	Up	2.82602e-42	2.25334e-41
novel_mir1530	0	153	0.001	5.42	12.4041	Up	2.82602e-42	2.24937e-41
novel_mir2757	0	153	0.001	5.42	12.4041	Up	2.82602e-42	2.24542e-41
novel_mir5370	0	153	0.001	5.42	12.4041	Up	2.82602e-42	2.24148e-41
novel_mir849	0	152	0.001	5.39	12.3961	Up	5.28356e-42	4.16149e-41
novel_mir2113	0	152	0.001	5.39	12.3961	Up	5.28356e-42	4.15426e-41
novel_mir1684	0	152	0.001	5.39	12.3961	Up	5.28356e-42	4.14704e-41
novel_mir2270	0	151	0.001	5.35	12.3853	Up	9.87824e-42	7.72656e-41
novel_mir4783	0	151	0.001	5.35	12.3853	Up	9.87824e-42	7.71322e-41
novel_mir4989	0	151	0.001	5.35	12.3853	Up	9.87824e-42	7.69992e-41
novel_mir439	0	151	0.001	5.35	12.3853	Up	9.87824e-42	7.68666e-41
novel_mir491	0	151	0.001	5.35	12.3853	Up	9.87824e-42	7.67346e-41
novel_mir1967	0	150	0.001	5.32	12.3772	Up	1.84685e-41	1.42485e-40
novel_mir3248	0	150	0.001	5.32	12.3772	Up	1.84685e-41	1.42242e-40
novel_mir5962	0	150	0.001	5.32	12.3772	Up	1.84685e-41	1.42e-40
novel_mir5569	0	149	0.001	5.28	12.3663	Up	3.4529e-41	2.64138e-40
novel_mir6011	0	149	0.001	5.28	12.3663	Up	3.4529e-41	2.63692e-40
novel_mir3702	0	149	0.001	5.28	12.3663	Up	3.4529e-41	2.63247e-40
novel_mir5064	0	148	0.001	5.24	12.3554	Up	6.4556e-41	4.90517e-40
novel_mir4787	0	148	0.001	5.24	12.3554	Up	6.4556e-41	4.89694e-40
novel_mir1069	0	147	0.001	5.21	12.3471	Up	1.20695e-40	9.14005e-40
novel_mir4507	0	146	0.001	5.17	12.3359	Up	2.25652e-40	1.70597e-39
novel_mir1620	0	145	0.001	5.14	12.3276	Up	4.21884e-40	3.1842e-39
novel_mir221	0	145	0.001	5.14	12.3276	Up	4.21884e-40	3.1789e-39
novel_mir5217	0	144	0.001	5.1	12.3163	Up	7.8876e-40	5.92356e-39
novel_mir412	0	144	0.001	5.1	12.3163	Up	7.8876e-40	5.91374e-39
novel_mir4945	0	144	0.001	5.1	12.3163	Up	7.8876e-40	5.90395e-39
novel_mir2770	0	144	0.001	5.1	12.3163	Up	7.8876e-40	5.89419e-39
novel_mir5508	0	143	0.001	5.07	12.3078	Up	1.47468e-39	1.09836e-38
novel_mir566	0	143	0.001	5.07	12.3078	Up	1.47468e-39	1.09655e-38
novel_mir4294	0	143	0.001	5.07	12.3078	Up	1.47468e-39	1.09475e-38
novel_mir2586	0	142	0.001	5.03	12.2963	Up	2.75708e-39	2.0434e-38
novel_mir40	0	142	0.001	5.03	12.2963	Up	2.75708e-39	2.04006e-38
novel_mir3901	0	142	0.001	5.03	12.2963	Up	2.75708e-39	2.03673e-38
novel_mir3338	0	142	0.001	5.03	12.2963	Up	2.75708e-39	2.0334e-38
novel_mir776	0	142	0.001	5.03	12.2963	Up	2.75708e-39	2.03009e-38
novel_mir2026	0	142	0.001	5.03	12.2963	Up	2.75708e-39	2.02679e-38
novel_mir1321	0	141	0.001	5	12.2877	Up	5.15468e-39	3.75876e-38
novel_mir3257	0	141	0.001	5	12.2877	Up	5.15468e-39	3.75271e-38
novel_mir2877	0	140	0.001	4.96	12.2761	Up	9.63728e-39	6.98239e-38
novel_mir1925	0	140	0.001	4.96	12.2761	Up	9.63728e-39	6.97122e-38
novel_mir1110	0	140	0.001	4.96	12.2761	Up	9.63728e-39	6.96009e-38
novel_mir2817	0	139	0.001	4.93	12.2674	Up	1.8018e-38	1.29506e-37
novel_mir65	0	139	0.001	4.93	12.2674	Up	1.8018e-38	1.29301e-37
novel_mir1396	0	139	0.001	4.93	12.2674	Up	1.8018e-38	1.29096e-37
novel_mir4962	0	139	0.001	4.93	12.2674	Up	1.8018e-38	1.28892e-37
novel_mir5043	0	139	0.001	4.93	12.2674	Up	1.8018e-38	1.28688e-37
novel_mir702	0	139	0.001	4.93	12.2674	Up	1.8018e-38	1.28485e-37
novel_mir3522	0	139	0.001	4.93	12.2674	Up	1.8018e-38	1.28283e-37
novel_mir798	0	139	0.001	4.93	12.2674	Up	1.8018e-38	1.28081e-37
novel_mir3400	0	138	0.001	4.89	12.2556	Up	3.36868e-38	2.36855e-37
novel_mir1683	0	138	0.001	4.89	12.2556	Up	3.36868e-38	2.36488e-37
novel_mir2481	0	138	0.001	4.89	12.2556	Up	3.36868e-38	2.36121e-37
novel_mir647	0	138	0.001	4.89	12.2556	Up	3.36868e-38	2.35755e-37
novel_mir4071	0	138	0.001	4.89	12.2556	Up	3.36868e-38	2.35391e-37
novel_mir4705	0	138	0.001	4.89	12.2556	Up	3.36868e-38	2.35028e-37
novel_mir1145	0	138	0.001	4.89	12.2556	Up	3.36868e-38	2.34666e-37
novel_mir1413	0	137	0.001	4.85	12.2438	Up	6.29812e-38	4.36046e-37
novel_mir335	0	137	0.001	4.85	12.2438	Up	6.29812e-38	4.35379e-37
novel_mir998	0	137	0.001	4.85	12.2438	Up	6.29812e-38	4.34715e-37
novel_mir1718	0	137	0.001	4.85	12.2438	Up	6.29812e-38	4.34052e-37
novel_mir2758	0	136	0.001	4.82	12.2348	Up	1.17751e-37	8.07817e-37
novel_mir989	0	136	0.001	4.82	12.2348	Up	1.17751e-37	8.06593e-37
novel_mir5789	0	136	0.001	4.82	12.2348	Up	1.17751e-37	8.05373e-37
novel_mir15	0	135	0.001	4.78	12.2228	Up	2.20148e-37	1.50119e-36
novel_mir4913	0	135	0.001	4.78	12.2228	Up	2.20148e-37	1.49893e-36
novel_mir1926	0	135	0.001	4.78	12.2228	Up	2.20148e-37	1.49668e-36
novel_mir1391	0	135	0.001	4.78	12.2228	Up	2.20148e-37	1.49443e-36
novel_mir3830	0	134	0.001	4.75	12.2137	Up	4.11594e-37	2.78149e-36
novel_mir569	0	134	0.001	4.75	12.2137	Up	4.11594e-37	2.77734e-36
novel_mir2444	0	134	0.001	4.75	12.2137	Up	4.11594e-37	2.7732e-36
novel_mir4902	0	134	0.001	4.75	12.2137	Up	4.11594e-37	2.76907e-36
novel_mir795	0	134	0.001	4.75	12.2137	Up	4.11594e-37	2.76496e-36
novel_mir5573	0	134	0.001	4.75	12.2137	Up	4.11594e-37	2.76086e-36
novel_mir665	0	134	0.001	4.75	12.2137	Up	4.11594e-37	2.75677e-36
novel_mir1448	0	133	0.001	4.71	12.2015	Up	7.69522e-37	5.14646e-36
novel_mir5139	0	133	0.001	4.71	12.2015	Up	7.69522e-37	5.13886e-36
novel_mir1870	0	132	0.001	4.68	12.1923	Up	1.43871e-36	9.56531e-36
novel_mir1541	0	132	0.001	4.68	12.1923	Up	1.43871e-36	9.55126e-36
novel_mir2171	0	132	0.001	4.68	12.1923	Up	1.43871e-36	9.53725e-36
novel_mir5434	0	132	0.001	4.68	12.1923	Up	1.43871e-36	9.52329e-36
novel_mir578	0	132	0.001	4.68	12.1923	Up	1.43871e-36	9.50937e-36
novel_mir63	0	132	0.001	4.68	12.1923	Up	1.43871e-36	9.49549e-36
novel_mir2626	0	131	0.001	4.64	12.1799	Up	2.68984e-36	1.76499e-35
novel_mir3424	0	131	0.001	4.64	12.1799	Up	2.68984e-36	1.76243e-35
novel_mir4519	0	131	0.001	4.64	12.1799	Up	2.68984e-36	1.75988e-35
novel_mir1037	0	130	0.001	4.61	12.1706	Up	5.02896e-36	3.27607e-35
novel_mir5338	0	130	0.001	4.61	12.1706	Up	5.02896e-36	3.27136e-35
novel_mir365	0	130	0.001	4.61	12.1706	Up	5.02896e-36	3.26666e-35
novel_mir4381	0	129	0.001	4.57	12.158	Up	9.4022e-36	6.08117e-35
novel_mir3119	0	129	0.001	4.57	12.158	Up	9.4022e-36	6.07248e-35
novel_mir5308	0	129	0.001	4.57	12.158	Up	9.4022e-36	6.06382e-35
novel_mir3345	0	128	0.001	4.54	12.1485	Up	1.75785e-35	1.12887e-34
novel_mir3560	0	128	0.001	4.54	12.1485	Up	1.75785e-35	1.12727e-34
novel_mir207	0	128	0.001	4.54	12.1485	Up	1.75785e-35	1.12567e-34
novel_mir1427	0	128	0.001	4.54	12.1485	Up	1.75785e-35	1.12408e-34
novel_mir4170	0	128	0.001	4.54	12.1485	Up	1.75785e-35	1.12249e-34
novel_mir2352	0	128	0.001	4.54	12.1485	Up	1.75785e-35	1.12091e-34
novel_mir360	0	128	0.001	4.54	12.1485	Up	1.75785e-35	1.11933e-34
novel_mir978	0	128	0.001	4.54	12.1485	Up	1.75785e-35	1.11776e-34
novel_mir3111	0	128	0.001	4.54	12.1485	Up	1.75785e-35	1.11619e-34
novel_mir3233	0	127	0.001	4.5	12.1357	Up	3.2865e-35	2.07228e-34
novel_mir2297	0	127	0.001	4.5	12.1357	Up	3.2865e-35	2.0694e-34
novel_mir2627	0	127	0.001	4.5	12.1357	Up	3.2865e-35	2.06652e-34
novel_mir2143	0	127	0.001	4.5	12.1357	Up	3.2865e-35	2.06365e-34
novel_mir5333	0	127	0.001	4.5	12.1357	Up	3.2865e-35	2.06079e-34
novel_mir5462	0	127	0.001	4.5	12.1357	Up	3.2865e-35	2.05793e-34
novel_mir2862	0	127	0.001	4.5	12.1357	Up	3.2865e-35	2.05509e-34
novel_mir5521	0	127	0.001	4.5	12.1357	Up	3.2865e-35	2.05225e-34
novel_mir603	0	125	0.001	4.43	12.1131	Up	1.14879e-34	7.10487e-34
novel_mir851	0	125	0.001	4.43	12.1131	Up	1.14879e-34	7.09517e-34
novel_mir1849	0	125	0.001	4.43	12.1131	Up	1.14879e-34	7.08549e-34
novel_mir2629	0	125	0.001	4.43	12.1131	Up	1.14879e-34	7.07583e-34
novel_mir236	0	125	0.001	4.43	12.1131	Up	1.14879e-34	7.06621e-34
novel_mir2063	0	125	0.001	4.43	12.1131	Up	1.14879e-34	7.05661e-34
novel_mir3944	0	124	0.001	4.39	12.1	Up	2.14778e-34	1.31041e-33
novel_mir1573	0	124	0.001	4.39	12.1	Up	2.14778e-34	1.30864e-33
novel_mir1307	0	124	0.001	4.39	12.1	Up	2.14778e-34	1.30688e-33
novel_mir2386	0	124	0.001	4.39	12.1	Up	2.14778e-34	1.30512e-33
novel_mir4338	0	124	0.001	4.39	12.1	Up	2.14778e-34	1.30337e-33
novel_mir1563	0	124	0.001	4.39	12.1	Up	2.14778e-34	1.30162e-33
novel_mir3373	0	123	0.001	4.36	12.0901	Up	4.01554e-34	2.43029e-33
novel_mir2344	0	123	0.001	4.36	12.0901	Up	4.01554e-34	2.42704e-33
novel_mir318	0	123	0.001	4.36	12.0901	Up	4.01554e-34	2.4238e-33
novel_mir820	0	123	0.001	4.36	12.0901	Up	4.01554e-34	2.42057e-33
novel_mir420	0	123	0.001	4.36	12.0901	Up	4.01554e-34	2.41734e-33
novel_mir1271	0	123	0.001	4.36	12.0901	Up	4.01554e-34	2.41413e-33
novel_mir2591	0	123	0.001	4.36	12.0901	Up	4.01554e-34	2.41092e-33
novel_mir2923	0	123	0.001	4.36	12.0901	Up	4.01554e-34	2.40773e-33
novel_mir2813	0	123	0.001	4.36	12.0901	Up	4.01554e-34	2.40454e-33
novel_mir1902	0	122	0.001	4.32	12.0768	Up	7.50752e-34	4.48369e-33
novel_mir3661	0	122	0.001	4.32	12.0768	Up	7.50752e-34	4.47777e-33
novel_mir4221	0	122	0.001	4.32	12.0768	Up	7.50752e-34	4.47187e-33
novel_mir5376	0	122	0.001	4.32	12.0768	Up	7.50752e-34	4.46599e-33
novel_mir5648	0	122	0.001	4.32	12.0768	Up	7.50752e-34	4.46012e-33
novel_mir3007	0	122	0.001	4.32	12.0768	Up	7.50752e-34	4.45426e-33
novel_mir2801	0	122	0.001	4.32	12.0768	Up	7.50752e-34	4.44843e-33
novel_mir1869	0	122	0.001	4.32	12.0768	Up	7.50752e-34	4.4426e-33
novel_mir5593	0	121	0.001	4.29	12.0668	Up	1.40362e-33	8.28427e-33
novel_mir4401	0	121	0.001	4.29	12.0668	Up	1.40362e-33	8.27347e-33
novel_mir4078	0	121	0.001	4.29	12.0668	Up	1.40362e-33	8.26269e-33
novel_mir4131	0	121	0.001	4.29	12.0668	Up	1.40362e-33	8.25195e-33
novel_mir6120	0	121	0.001	4.29	12.0668	Up	1.40362e-33	8.24123e-33
novel_mir714	0	121	0.001	4.29	12.0668	Up	1.40362e-33	8.23054e-33
novel_mir4374	0	121	0.001	4.29	12.0668	Up	1.40362e-33	8.21988e-33
novel_mir1923	0	120	0.001	4.25	12.0532	Up	2.62422e-33	1.52888e-32
novel_mir1649	0	120	0.001	4.25	12.0532	Up	2.62422e-33	1.52691e-32
novel_mir4559	0	120	0.001	4.25	12.0532	Up	2.62422e-33	1.52495e-32
novel_mir1628	0	120	0.001	4.25	12.0532	Up	2.62422e-33	1.52299e-32
novel_mir3058	0	120	0.001	4.25	12.0532	Up	2.62422e-33	1.52104e-32
novel_mir138	0	120	0.001	4.25	12.0532	Up	2.62422e-33	1.51909e-32
novel_mir3414	0	120	0.001	4.25	12.0532	Up	2.62422e-33	1.51715e-32
novel_mir4762	0	119	0.001	4.22	12.043	Up	4.90628e-33	2.82564e-32
novel_mir2989	0	119	0.001	4.22	12.043	Up	4.90628e-33	2.82205e-32
novel_mir2438	0	119	0.001	4.22	12.043	Up	4.90628e-33	2.81846e-32
novel_mir5975	0	119	0.001	4.22	12.043	Up	4.90628e-33	2.81488e-32
novel_mir4797	0	119	0.001	4.22	12.043	Up	4.90628e-33	2.81132e-32
novel_mir3900	0	119	0.001	4.22	12.043	Up	4.90628e-33	2.80776e-32
novel_mir4870	0	119	0.001	4.22	12.043	Up	4.90628e-33	2.80421e-32
novel_mir3293	0	118	0.001	4.18	12.0293	Up	9.17288e-33	5.223e-32
novel_mir416	0	118	0.001	4.18	12.0293	Up	9.17288e-33	5.21643e-32
novel_mir1079	0	118	0.001	4.18	12.0293	Up	9.17288e-33	5.20987e-32
novel_mir5088	0	118	0.001	4.18	12.0293	Up	9.17288e-33	5.20334e-32
novel_mir4513	0	117	0.001	4.15	12.0189	Up	1.71497e-32	9.67965e-32
novel_mir1196	0	117	0.001	4.15	12.0189	Up	1.71497e-32	9.66758e-32
novel_mir3909	0	117	0.001	4.15	12.0189	Up	1.71497e-32	9.65554e-32
novel_mir2254	0	117	0.001	4.15	12.0189	Up	1.71497e-32	9.64353e-32
novel_mir972	0	117	0.001	4.15	12.0189	Up	1.71497e-32	9.63155e-32
novel_mir2752	0	117	0.001	4.15	12.0189	Up	1.71497e-32	9.6196e-32
novel_mir3223	0	116	0.001	4.11	12.0049	Up	3.20634e-32	1.7852e-31
novel_mir3264	0	116	0.001	4.11	12.0049	Up	3.20634e-32	1.78301e-31
novel_mir6007	0	116	0.001	4.11	12.0049	Up	3.20634e-32	1.78082e-31
mmu-miR-6961-5p	0	116	0.001	4.11	12.0049	Up	3.20634e-32	1.77863e-31
novel_mir4614	0	116	0.001	4.11	12.0049	Up	3.20634e-32	1.77645e-31
novel_mir5751	0	116	0.001	4.11	12.0049	Up	3.20634e-32	1.77428e-31
novel_mir287	0	116	0.001	4.11	12.0049	Up	3.20634e-32	1.77211e-31
novel_mir2478	0	116	0.001	4.11	12.0049	Up	3.20634e-32	1.76995e-31
novel_mir1815	0	115	0.001	4.08	11.9944	Up	5.99462e-32	3.29303e-31
novel_mir5840	0	115	0.001	4.08	11.9944	Up	5.99462e-32	3.28904e-31
novel_mir3874	0	115	0.001	4.08	11.9944	Up	5.99462e-32	3.28505e-31
novel_mir5388	0	115	0.001	4.08	11.9944	Up	5.99462e-32	3.28107e-31
novel_mir4083	0	115	0.001	4.08	11.9944	Up	5.99462e-32	3.27711e-31
novel_mir5949	0	115	0.001	4.08	11.9944	Up	5.99462e-32	3.27315e-31
novel_mir1346	0	114	0.001	4.04	11.9801	Up	1.12076e-31	6.09011e-31
novel_mir3203	0	114	0.001	4.04	11.9801	Up	1.12076e-31	6.0828e-31
novel_mir1768	0	114	0.001	4.04	11.9801	Up	1.12076e-31	6.07551e-31
novel_mir3116	0	114	0.001	4.04	11.9801	Up	1.12076e-31	6.06823e-31
novel_mir5386	0	114	0.001	4.04	11.9801	Up	1.12076e-31	6.06097e-31
novel_mir5679	0	113	0.001	4	11.9658	Up	2.0954e-31	1.12777e-30
novel_mir4576	0	113	0.001	4	11.9658	Up	2.0954e-31	1.12643e-30
novel_mir2117	0	113	0.001	4	11.9658	Up	2.0954e-31	1.1251e-30
novel_mir1983	0	113	0.001	4	11.9658	Up	2.0954e-31	1.12376e-30
novel_mir2236	0	113	0.001	4	11.9658	Up	2.0954e-31	1.12243e-30
novel_mir497	0	112	0.001	3.97	11.9549	Up	3.9176e-31	2.08862e-30
novel_mir4796	0	112	0.001	3.97	11.9549	Up	3.9176e-31	2.08616e-30
novel_mir2073	0	112	0.001	3.97	11.9549	Up	3.9176e-31	2.0837e-30
novel_mir2491	0	112	0.001	3.97	11.9549	Up	3.9176e-31	2.08125e-30
novel_mir3810	0	111	0.001	3.93	11.9403	Up	7.3244e-31	3.87294e-30
novel_mir2654	0	111	0.001	3.93	11.9403	Up	7.3244e-31	3.86841e-30
novel_mir2537	0	111	0.001	3.93	11.9403	Up	7.3244e-31	3.8639e-30
novel_mir632	0	111	0.001	3.93	11.9403	Up	7.3244e-31	3.8594e-30
novel_mir5407	0	111	0.001	3.93	11.9403	Up	7.3244e-31	3.8549e-30
novel_mir3762	0	111	0.001	3.93	11.9403	Up	7.3244e-31	3.85042e-30
novel_mir4687	0	111	0.001	3.93	11.9403	Up	7.3244e-31	3.84595e-30
novel_mir928	0	111	0.001	3.93	11.9403	Up	7.3244e-31	3.84149e-30
novel_mir5232	0	111	0.001	3.93	11.9403	Up	7.3244e-31	3.83704e-30
novel_mir5105	0	110	0.001	3.9	11.9293	Up	1.36938e-30	7.14068e-30
novel_mir703	0	110	0.001	3.9	11.9293	Up	1.36938e-30	7.13245e-30
novel_mir4994	0	110	0.001	3.9	11.9293	Up	1.36938e-30	7.12424e-30
novel_mir1304	0	110	0.001	3.9	11.9293	Up	1.36938e-30	7.11605e-30
novel_mir2746	0	110	0.001	3.9	11.9293	Up	1.36938e-30	7.10788e-30
novel_mir3439	0	109	0.001	3.86	11.9144	Up	2.56022e-30	1.31981e-29
novel_mir2935	0	109	0.001	3.86	11.9144	Up	2.56022e-30	1.31831e-29
novel_mir2066	0	109	0.001	3.86	11.9144	Up	2.56022e-30	1.31681e-29
novel_mir1342	0	108	0.001	3.83	11.9031	Up	4.78662e-30	2.45355e-29
novel_mir418	0	108	0.001	3.83	11.9031	Up	4.78662e-30	2.45077e-29
novel_mir640	0	108	0.001	3.83	11.9031	Up	4.78662e-30	2.448e-29
novel_mir67	0	108	0.001	3.83	11.9031	Up	4.78662e-30	2.44523e-29
novel_mir5890	0	108	0.001	3.83	11.9031	Up	4.78662e-30	2.44247e-29
novel_mir3768	0	108	0.001	3.83	11.9031	Up	4.78662e-30	2.43972e-29
novel_mir2538	0	108	0.001	3.83	11.9031	Up	4.78662e-30	2.43697e-29
novel_mir2687	0	108	0.001	3.83	11.9031	Up	4.78662e-30	2.43423e-29
novel_mir3668	0	108	0.001	3.83	11.9031	Up	4.78662e-30	2.4315e-29
novel_mir4819	0	108	0.001	3.83	11.9031	Up	4.78662e-30	2.42877e-29
novel_mir1164	0	108	0.001	3.83	11.9031	Up	4.78662e-30	2.42604e-29
novel_mir990	0	108	0.001	3.83	11.9031	Up	4.78662e-30	2.42333e-29
novel_mir3347	0	108	0.001	3.83	11.9031	Up	4.78662e-30	2.42062e-29
novel_mir5010	0	108	0.001	3.83	11.9031	Up	4.78662e-30	2.41791e-29
novel_mir3555	0	108	0.001	3.83	11.9031	Up	4.78662e-30	2.41521e-29
novel_mir5718	0	107	0.001	3.79	11.888	Up	8.94912e-30	4.49045e-29
novel_mir1439	0	107	0.001	3.79	11.888	Up	8.94912e-30	4.48547e-29
novel_mir1200	0	107	0.001	3.79	11.888	Up	8.94912e-30	4.48051e-29
novel_mir2041	0	107	0.001	3.79	11.888	Up	8.94912e-30	4.47555e-29
novel_mir2563	0	107	0.001	3.79	11.888	Up	8.94912e-30	4.4706e-29
novel_mir1898	0	107	0.001	3.79	11.888	Up	8.94912e-30	4.46567e-29
novel_mir170	0	107	0.001	3.79	11.888	Up	8.94912e-30	4.46075e-29
novel_mir3260	0	107	0.001	3.79	11.888	Up	8.94912e-30	4.45583e-29
novel_mir5025	0	107	0.001	3.79	11.888	Up	8.94912e-30	4.45093e-29
novel_mir867	0	107	0.001	3.79	11.888	Up	8.94912e-30	4.44604e-29
novel_mir5507	0	107	0.001	3.79	11.888	Up	8.94912e-30	4.44116e-29
novel_mir1062	0	107	0.001	3.79	11.888	Up	8.94912e-30	4.43629e-29
novel_mir1800	0	106	0.001	3.76	11.8765	Up	1.67314e-29	8.25794e-29
novel_mir780	0	106	0.001	3.76	11.8765	Up	1.67314e-29	8.24894e-29
novel_mir4511	0	106	0.001	3.76	11.8765	Up	1.67314e-29	8.23995e-29
novel_mir4672	0	106	0.001	3.76	11.8765	Up	1.67314e-29	8.23098e-29
novel_mir5705	0	106	0.001	3.76	11.8765	Up	1.67314e-29	8.22204e-29
novel_mir438	0	106	0.001	3.76	11.8765	Up	1.67314e-29	8.21311e-29
novel_mir565	0	106	0.001	3.76	11.8765	Up	1.67314e-29	8.2042e-29
novel_mir1727	0	106	0.001	3.76	11.8765	Up	1.67314e-29	8.19531e-29
novel_mir5524	0	106	0.001	3.76	11.8765	Up	1.67314e-29	8.18644e-29
novel_mir1991	0	106	0.001	3.76	11.8765	Up	1.67314e-29	8.17759e-29
novel_mir4109	0	105	0.001	3.72	11.8611	Up	3.12814e-29	1.5256e-28
novel_mir1087	0	105	0.001	3.72	11.8611	Up	3.12814e-29	1.52396e-28
novel_mir986	0	105	0.001	3.72	11.8611	Up	3.12814e-29	1.52232e-28
novel_mir2942	0	105	0.001	3.72	11.8611	Up	3.12814e-29	1.52068e-28
novel_mir4862	0	105	0.001	3.72	11.8611	Up	3.12814e-29	1.51905e-28
novel_mir5431	0	105	0.001	3.72	11.8611	Up	3.12814e-29	1.51742e-28
novel_mir2338	0	105	0.001	3.72	11.8611	Up	3.12814e-29	1.51579e-28
novel_mir5576	0	105	0.001	3.72	11.8611	Up	3.12814e-29	1.51417e-28
novel_mir514	0	104	0.001	3.69	11.8494	Up	5.8484e-29	2.80686e-28
novel_mir2102	0	104	0.001	3.69	11.8494	Up	5.8484e-29	2.80388e-28
novel_mir677	0	104	0.001	3.69	11.8494	Up	5.8484e-29	2.80091e-28
novel_mir2398	0	104	0.001	3.69	11.8494	Up	5.8484e-29	2.79795e-28
novel_mir3404	0	104	0.001	3.69	11.8494	Up	5.8484e-29	2.79499e-28
novel_mir2511	0	103	0.001	3.65	11.8337	Up	1.09343e-28	5.21454e-28
novel_mir5982	0	103	0.001	3.65	11.8337	Up	1.09343e-28	5.20905e-28
novel_mir5245	0	103	0.001	3.65	11.8337	Up	1.09343e-28	5.20357e-28
novel_mir4856	0	103	0.001	3.65	11.8337	Up	1.09343e-28	5.19809e-28
novel_mir2301	0	103	0.001	3.65	11.8337	Up	1.09343e-28	5.19263e-28
novel_mir940	0	102	0.001	3.61	11.8178	Up	2.04428e-28	9.66756e-28
novel_mir3212	0	102	0.001	3.61	11.8178	Up	2.04428e-28	9.65746e-28
novel_mir591	0	102	0.001	3.61	11.8178	Up	2.04428e-28	9.64738e-28
novel_mir1753	0	102	0.001	3.61	11.8178	Up	2.04428e-28	9.63732e-28
novel_mir4121	0	102	0.001	3.61	11.8178	Up	2.04428e-28	9.62728e-28
novel_mir727	0	102	0.001	3.61	11.8178	Up	2.04428e-28	9.61726e-28
novel_mir5908	0	102	0.001	3.61	11.8178	Up	2.04428e-28	9.60727e-28
novel_mir2282	0	101	0.001	3.58	11.8057	Up	3.82204e-28	1.79062e-27
novel_mir2442	0	101	0.001	3.58	11.8057	Up	3.82204e-28	1.78876e-27
novel_mir4919	0	101	0.001	3.58	11.8057	Up	3.82204e-28	1.78691e-27
novel_mir4820	0	101	0.001	3.58	11.8057	Up	3.82204e-28	1.78507e-27
novel_mir2257	0	101	0.001	3.58	11.8057	Up	3.82204e-28	1.78322e-27
novel_mir3377	0	101	0.001	3.58	11.8057	Up	3.82204e-28	1.78139e-27
novel_mir5258	0	101	0.001	3.58	11.8057	Up	3.82204e-28	1.77955e-27
novel_mir1734	0	101	0.001	3.58	11.8057	Up	3.82204e-28	1.77772e-27
novel_mir4735	0	101	0.001	3.58	11.8057	Up	3.82204e-28	1.77589e-27
novel_mir4261	0	100	0.001	3.54	11.7895	Up	7.14574e-28	3.30326e-27
novel_mir5868	0	100	0.001	3.54	11.7895	Up	7.14574e-28	3.29989e-27
novel_mir4506	0	100	0.001	3.54	11.7895	Up	7.14574e-28	3.29652e-27
novel_mir2062	0	100	0.001	3.54	11.7895	Up	7.14574e-28	3.29316e-27
novel_mir2521	0	100	0.001	3.54	11.7895	Up	7.14574e-28	3.28981e-27
novel_mir1695	0	100	0.001	3.54	11.7895	Up	7.14574e-28	3.28646e-27
novel_mir5820	0	100	0.001	3.54	11.7895	Up	7.14574e-28	3.28312e-27
novel_mir3425	0	100	0.001	3.54	11.7895	Up	7.14574e-28	3.27979e-27
novel_mir1858	0	100	0.001	3.54	11.7895	Up	7.14574e-28	3.27646e-27
novel_mir1269	0	100	0.001	3.54	11.7895	Up	7.14574e-28	3.27314e-27
novel_mir2421	0	99	0.001	3.51	11.7773	Up	1.33598e-27	6.09481e-27
novel_mir5457	0	99	0.001	3.51	11.7773	Up	1.33598e-27	6.08867e-27
novel_mir1378	0	99	0.001	3.51	11.7773	Up	1.33598e-27	6.08253e-27
novel_mir5696	0	99	0.001	3.51	11.7773	Up	1.33598e-27	6.07642e-27
novel_mir1961	0	99	0.001	3.51	11.7773	Up	1.33598e-27	6.07031e-27
novel_mir607	0	99	0.001	3.51	11.7773	Up	1.33598e-27	6.06421e-27
novel_mir952	0	99	0.001	3.51	11.7773	Up	1.33598e-27	6.05813e-27
novel_mir3843	0	99	0.001	3.51	11.7773	Up	1.33598e-27	6.05206e-27
novel_mir4618	0	99	0.001	3.51	11.7773	Up	1.33598e-27	6.046e-27
novel_mir5671	0	99	0.001	3.51	11.7773	Up	1.33598e-27	6.03996e-27
novel_mir1452	0	98	0.001	3.47	11.7607	Up	2.49776e-27	1.12139e-26
novel_mir1785	0	98	0.001	3.47	11.7607	Up	2.49776e-27	1.12028e-26
novel_mir3167	0	98	0.001	3.47	11.7607	Up	2.49776e-27	1.11916e-26
novel_mir2514	0	98	0.001	3.47	11.7607	Up	2.49776e-27	1.11806e-26
novel_mir831	0	98	0.001	3.47	11.7607	Up	2.49776e-27	1.11695e-26
novel_mir1235	0	98	0.001	3.47	11.7607	Up	2.49776e-27	1.11585e-26
novel_mir687	0	98	0.001	3.47	11.7607	Up	2.49776e-27	1.11475e-26
novel_mir5989	0	98	0.001	3.47	11.7607	Up	2.49776e-27	1.11365e-26
novel_mir3578	0	98	0.001	3.47	11.7607	Up	2.49776e-27	1.11255e-26
novel_mir2040	0	98	0.001	3.47	11.7607	Up	2.49776e-27	1.11145e-26
novel_mir4363	0	98	0.001	3.47	11.7607	Up	2.49776e-27	1.11036e-26
novel_mir6035	0	98	0.001	3.47	11.7607	Up	2.49776e-27	1.10927e-26
novel_mir1600	0	98	0.001	3.47	11.7607	Up	2.49776e-27	1.10818e-26
novel_mir4176	0	97	0.001	3.44	11.7482	Up	4.66986e-27	2.06378e-26
novel_mir5212	0	97	0.001	3.44	11.7482	Up	4.66986e-27	2.06176e-26
novel_mir476	0	97	0.001	3.44	11.7482	Up	4.66986e-27	2.05975e-26
novel_mir5977	0	97	0.001	3.44	11.7482	Up	4.66986e-27	2.05774e-26
novel_mir1645	0	97	0.001	3.44	11.7482	Up	4.66986e-27	2.05574e-26
novel_mir4372	0	97	0.001	3.44	11.7482	Up	4.66986e-27	2.05374e-26
novel_mir2892	0	97	0.001	3.44	11.7482	Up	4.66986e-27	2.05174e-26
novel_mir1114	0	96	0.001	3.4	11.7313	Up	8.73084e-27	3.82112e-26
novel_mir2418	0	96	0.001	3.4	11.7313	Up	8.73084e-27	3.81742e-26
novel_mir4738	0	96	0.001	3.4	11.7313	Up	8.73084e-27	3.81373e-26
novel_mir2799	0	96	0.001	3.4	11.7313	Up	8.73084e-27	3.81005e-26
novel_mir223	0	96	0.001	3.4	11.7313	Up	8.73084e-27	3.80638e-26
novel_mir5683	0	96	0.001	3.4	11.7313	Up	8.73084e-27	3.80271e-26
novel_mir2551	0	96	0.001	3.4	11.7313	Up	8.73084e-27	3.79905e-26
novel_mir4754	0	96	0.001	3.4	11.7313	Up	8.73084e-27	3.7954e-26
novel_mir2309	0	96	0.001	3.4	11.7313	Up	8.73084e-27	3.79175e-26
novel_mir374	0	96	0.001	3.4	11.7313	Up	8.73084e-27	3.78811e-26
novel_mir76	0	96	0.001	3.4	11.7313	Up	8.73084e-27	3.78448e-26
novel_mir3241	0	96	0.001	3.4	11.7313	Up	8.73084e-27	3.78086e-26
novel_mir1799	0	96	0.001	3.4	11.7313	Up	8.73084e-27	3.77724e-26
novel_mir841	0	96	0.001	3.4	11.7313	Up	8.73084e-27	3.77363e-26
novel_mir1340	0	96	0.001	3.4	11.7313	Up	8.73084e-27	3.77002e-26
novel_mir3815	0	96	0.001	3.4	11.7313	Up	8.73084e-27	3.76642e-26
novel_mir4529	0	96	0.001	3.4	11.7313	Up	8.73084e-27	3.76283e-26
novel_mir5210	0	95	0.001	3.37	11.7185	Up	1.63233e-26	7.01499e-26
novel_mir383	0	95	0.001	3.37	11.7185	Up	1.63233e-26	7.00833e-26
novel_mir1610	0	95	0.001	3.37	11.7185	Up	1.63233e-26	7.00168e-26
novel_mir59	0	95	0.001	3.37	11.7185	Up	1.63233e-26	6.99505e-26
novel_mir2536	0	95	0.001	3.37	11.7185	Up	1.63233e-26	6.98842e-26
novel_mir5760	0	95	0.001	3.37	11.7185	Up	1.63233e-26	6.98181e-26
novel_mir1000	0	95	0.001	3.37	11.7185	Up	1.63233e-26	6.97521e-26
novel_mir2824	0	95	0.001	3.37	11.7185	Up	1.63233e-26	6.96862e-26
novel_mir733	0	95	0.001	3.37	11.7185	Up	1.63233e-26	6.96205e-26
novel_mir263	0	95	0.001	3.37	11.7185	Up	1.63233e-26	6.95549e-26
novel_mir1690	0	95	0.001	3.37	11.7185	Up	1.63233e-26	6.94894e-26
novel_mir5682	0	95	0.001	3.37	11.7185	Up	1.63233e-26	6.9424e-26
novel_mir2179	0	95	0.001	3.37	11.7185	Up	1.63233e-26	6.93588e-26
novel_mir878	0	94	0.001	3.33	11.7013	Up	3.05184e-26	1.28827e-25
novel_mir5263	0	94	0.001	3.33	11.7013	Up	3.05184e-26	1.28707e-25
novel_mir46	0	94	0.001	3.33	11.7013	Up	3.05184e-26	1.28587e-25
novel_mir737	0	94	0.001	3.33	11.7013	Up	3.05184e-26	1.28467e-25
novel_mir5946	0	94	0.001	3.33	11.7013	Up	3.05184e-26	1.28348e-25
novel_mir4309	0	94	0.001	3.33	11.7013	Up	3.05184e-26	1.28228e-25
novel_mir1536	0	94	0.001	3.33	11.7013	Up	3.05184e-26	1.28109e-25
novel_mir2353	0	94	0.001	3.33	11.7013	Up	3.05184e-26	1.2799e-25
novel_mir1764	0	94	0.001	3.33	11.7013	Up	3.05184e-26	1.27872e-25
novel_mir1327	0	94	0.001	3.33	11.7013	Up	3.05184e-26	1.27753e-25
novel_mir424	0	93	0.001	3.3	11.6883	Up	5.70576e-26	2.38188e-25
novel_mir3981	0	93	0.001	3.3	11.6883	Up	5.70576e-26	2.37968e-25
novel_mir2912	0	93	0.001	3.3	11.6883	Up	5.70576e-26	2.37749e-25
novel_mir6076	0	92	0.001	3.26	11.6707	Up	1.06676e-25	4.42865e-25
novel_mir4171	0	92	0.001	3.26	11.6707	Up	1.06676e-25	4.42459e-25
novel_mir5046	0	92	0.001	3.26	11.6707	Up	1.06676e-25	4.42054e-25
novel_mir3732	0	92	0.001	3.26	11.6707	Up	1.06676e-25	4.41649e-25
novel_mir2795	0	92	0.001	3.26	11.6707	Up	1.06676e-25	4.41245e-25
novel_mir461	0	92	0.001	3.26	11.6707	Up	1.06676e-25	4.40841e-25
novel_mir2359	0	92	0.001	3.26	11.6707	Up	1.06676e-25	4.40439e-25
novel_mir4891	0	91	0.001	3.22	11.6528	Up	1.99442e-25	8.2195e-25
novel_mir1267	0	91	0.001	3.22	11.6528	Up	1.99442e-25	8.21201e-25
novel_mir2660	0	91	0.001	3.22	11.6528	Up	1.99442e-25	8.20454e-25
novel_mir5446	0	91	0.001	3.22	11.6528	Up	1.99442e-25	8.19708e-25
novel_mir3437	0	91	0.001	3.22	11.6528	Up	1.99442e-25	8.18964e-25
novel_mir3298	0	91	0.001	3.22	11.6528	Up	1.99442e-25	8.18221e-25
novel_mir5203	0	91	0.001	3.22	11.6528	Up	1.99442e-25	8.17479e-25
novel_mir2815	0	91	0.001	3.22	11.6528	Up	1.99442e-25	8.16738e-25
novel_mir1263	0	90	0.001	3.19	11.6393	Up	3.7288e-25	1.51873e-24
novel_mir2767	0	90	0.001	3.19	11.6393	Up	3.7288e-25	1.51736e-24
novel_mir1323	0	90	0.001	3.19	11.6393	Up	3.7288e-25	1.516e-24
novel_mir2316	0	90	0.001	3.19	11.6393	Up	3.7288e-25	1.51464e-24
novel_mir5270	0	90	0.001	3.19	11.6393	Up	3.7288e-25	1.51328e-24
novel_mir1770	0	90	0.001	3.19	11.6393	Up	3.7288e-25	1.51192e-24
novel_mir4648	0	90	0.001	3.19	11.6393	Up	3.7288e-25	1.51056e-24
novel_mir5213	0	90	0.001	3.19	11.6393	Up	3.7288e-25	1.50921e-24
novel_mir2008	0	90	0.001	3.19	11.6393	Up	3.7288e-25	1.50786e-24
novel_mir913	0	90	0.001	3.19	11.6393	Up	3.7288e-25	1.50652e-24
novel_mir3435	0	90	0.001	3.19	11.6393	Up	3.7288e-25	1.50517e-24
novel_mir2057	0	90	0.001	3.19	11.6393	Up	3.7288e-25	1.50383e-24
novel_mir1052	0	90	0.001	3.19	11.6393	Up	3.7288e-25	1.50249e-24
novel_mir533	0	89	0.001	3.15	11.6211	Up	6.97144e-25	2.79662e-24
novel_mir5739	0	89	0.001	3.15	11.6211	Up	6.97144e-25	2.79414e-24
novel_mir1706	0	89	0.001	3.15	11.6211	Up	6.97144e-25	2.79166e-24
novel_mir2522	0	89	0.001	3.15	11.6211	Up	6.97144e-25	2.78919e-24
novel_mir1952	0	89	0.001	3.15	11.6211	Up	6.97144e-25	2.78673e-24
mmu-miR-369-3p	0	89	0.001	3.15	11.6211	Up	6.97144e-25	2.78427e-24
novel_mir2470	0	89	0.001	3.15	11.6211	Up	6.97144e-25	2.78181e-24
novel_mir5078	0	89	0.001	3.15	11.6211	Up	6.97144e-25	2.77935e-24
novel_mir2506	0	89	0.001	3.15	11.6211	Up	6.97144e-25	2.77691e-24
novel_mir4965	0	89	0.001	3.15	11.6211	Up	6.97144e-25	2.77446e-24
novel_mir4826	0	89	0.001	3.15	11.6211	Up	6.97144e-25	2.77202e-24
novel_mir4012	0	89	0.001	3.15	11.6211	Up	6.97144e-25	2.76959e-24
novel_mir64	0	88	0.001	3.12	11.6073	Up	1.30339e-24	5.1554e-24
novel_mir384	0	88	0.001	3.12	11.6073	Up	1.30339e-24	5.1509e-24
novel_mir5465	0	88	0.001	3.12	11.6073	Up	1.30339e-24	5.1464e-24
novel_mir3352	0	88	0.001	3.12	11.6073	Up	1.30339e-24	5.14191e-24
novel_mir642	0	88	0.001	3.12	11.6073	Up	1.30339e-24	5.13742e-24
novel_mir730	0	88	0.001	3.12	11.6073	Up	1.30339e-24	5.13295e-24
novel_mir3114	0	88	0.001	3.12	11.6073	Up	1.30339e-24	5.12848e-24
novel_mir4585	0	88	0.001	3.12	11.6073	Up	1.30339e-24	5.12402e-24
novel_mir3286	0	88	0.001	3.12	11.6073	Up	1.30339e-24	5.11957e-24
novel_mir5742	0	88	0.001	3.12	11.6073	Up	1.30339e-24	5.11513e-24
novel_mir2691	0	88	0.001	3.12	11.6073	Up	1.30339e-24	5.11069e-24
novel_mir4440	0	87	0.001	3.08	11.5887	Up	2.43684e-24	9.49737e-24
novel_mir4499	0	87	0.001	3.08	11.5887	Up	2.43684e-24	9.48919e-24
novel_mir2857	0	87	0.001	3.08	11.5887	Up	2.43684e-24	9.48103e-24
novel_mir4311	0	87	0.001	3.08	11.5887	Up	2.43684e-24	9.47288e-24
novel_mir3591	0	87	0.001	3.08	11.5887	Up	2.43684e-24	9.46474e-24
novel_mir2360	0	87	0.001	3.08	11.5887	Up	2.43684e-24	9.45661e-24
novel_mir5385	0	87	0.001	3.08	11.5887	Up	2.43684e-24	9.4485e-24
novel_mir2240	0	87	0.001	3.08	11.5887	Up	2.43684e-24	9.44041e-24
novel_mir244	0	87	0.001	3.08	11.5887	Up	2.43684e-24	9.43232e-24
novel_mir6162	0	87	0.001	3.08	11.5887	Up	2.43684e-24	9.42425e-24
novel_mir5972	0	87	0.001	3.08	11.5887	Up	2.43684e-24	9.4162e-24
novel_mir2678	0	87	0.001	3.08	11.5887	Up	2.43684e-24	9.40816e-24
novel_mir1353	0	86	0.001	3.05	11.5746	Up	4.55596e-24	1.75447e-23
novel_mir2931	0	86	0.001	3.05	11.5746	Up	4.55596e-24	1.75298e-23
novel_mir109	0	86	0.001	3.05	11.5746	Up	4.55596e-24	1.75149e-23
novel_mir4364	0	86	0.001	3.05	11.5746	Up	4.55596e-24	1.75e-23
novel_mir4869	0	86	0.001	3.05	11.5746	Up	4.55596e-24	1.74851e-23
novel_mir2144	0	86	0.001	3.05	11.5746	Up	4.55596e-24	1.74703e-23
novel_mir4337	0	86	0.001	3.05	11.5746	Up	4.55596e-24	1.74555e-23
novel_mir4864	0	86	0.001	3.05	11.5746	Up	4.55596e-24	1.74407e-23
novel_mir2091	0	86	0.001	3.05	11.5746	Up	4.55596e-24	1.7426e-23
novel_mir524	0	86	0.001	3.05	11.5746	Up	4.55596e-24	1.74112e-23
novel_mir2204	0	86	0.001	3.05	11.5746	Up	4.55596e-24	1.73965e-23
novel_mir4675	0	86	0.001	3.05	11.5746	Up	4.55596e-24	1.73819e-23
novel_mir4328	0	86	0.001	3.05	11.5746	Up	4.55596e-24	1.73672e-23
novel_mir2988	0	86	0.001	3.05	11.5746	Up	4.55596e-24	1.73526e-23
novel_mir5695	0	86	0.001	3.05	11.5746	Up	4.55596e-24	1.7338e-23
novel_mir4201	0	85	0.001	3.01	11.5555	Up	8.51788e-24	3.21984e-23
novel_mir9	0	85	0.001	3.01	11.5555	Up	8.51788e-24	3.21715e-23
novel_mir436	0	85	0.001	3.01	11.5555	Up	8.51788e-24	3.21447e-23
novel_mir5101	0	85	0.001	3.01	11.5555	Up	8.51788e-24	3.21179e-23
novel_mir6124	0	85	0.001	3.01	11.5555	Up	8.51788e-24	3.20911e-23
novel_mir3765	0	85	0.001	3.01	11.5555	Up	8.51788e-24	3.20644e-23
novel_mir5677	0	85	0.001	3.01	11.5555	Up	8.51788e-24	3.20377e-23
novel_mir4293	0	85	0.001	3.01	11.5555	Up	8.51788e-24	3.20111e-23
novel_mir523	0	85	0.001	3.01	11.5555	Up	8.51788e-24	3.19845e-23
novel_mir6114	0	85	0.001	3.01	11.5555	Up	8.51788e-24	3.1958e-23
novel_mir1375	0	85	0.001	3.01	11.5555	Up	8.51788e-24	3.19315e-23
novel_mir460	0	85	0.001	3.01	11.5555	Up	8.51788e-24	3.1905e-23
novel_mir884	0	85	0.001	3.01	11.5555	Up	8.51788e-24	3.18786e-23
novel_mir2042	0	85	0.001	3.01	11.5555	Up	8.51788e-24	3.18522e-23
novel_mir658	0	85	0.001	3.01	11.5555	Up	8.51788e-24	3.18259e-23
novel_mir2311	0	85	0.001	3.01	11.5555	Up	8.51788e-24	3.17996e-23
novel_mir2128	0	85	0.001	3.01	11.5555	Up	8.51788e-24	3.17734e-23
novel_mir2646	0	85	0.001	3.01	11.5555	Up	8.51788e-24	3.17472e-23
novel_mir228	0	85	0.001	3.01	11.5555	Up	8.51788e-24	3.1721e-23
novel_mir1265	0	85	0.001	3.01	11.5555	Up	8.51788e-24	3.16949e-23
novel_mir504	0	85	0.001	3.01	11.5555	Up	8.51788e-24	3.16689e-23
novel_mir2623	0	85	0.001	3.01	11.5555	Up	8.51788e-24	3.16428e-23
mmu-miR-1895	0	84	0.001	2.98	11.5411	Up	1.59252e-23	5.89179e-23
novel_mir3918	0	84	0.001	2.98	11.5411	Up	1.59252e-23	5.88697e-23
novel_mir4406	0	84	0.001	2.98	11.5411	Up	1.59252e-23	5.88216e-23
novel_mir2940	0	84	0.001	2.98	11.5411	Up	1.59252e-23	5.87736e-23
novel_mir3235	0	84	0.001	2.98	11.5411	Up	1.59252e-23	5.87257e-23
novel_mir4977	0	84	0.001	2.98	11.5411	Up	1.59252e-23	5.86778e-23
novel_mir567	0	84	0.001	2.98	11.5411	Up	1.59252e-23	5.863e-23
novel_mir4281	0	84	0.001	2.98	11.5411	Up	1.59252e-23	5.85823e-23
novel_mir4428	0	84	0.001	2.98	11.5411	Up	1.59252e-23	5.85347e-23
novel_mir5039	0	84	0.001	2.98	11.5411	Up	1.59252e-23	5.84871e-23
novel_mir3635	0	84	0.001	2.98	11.5411	Up	1.59252e-23	5.84396e-23
novel_mir428	0	84	0.001	2.98	11.5411	Up	1.59252e-23	5.83923e-23
novel_mir5970	0	84	0.001	2.98	11.5411	Up	1.59252e-23	5.83449e-23
novel_mir1344	0	84	0.001	2.98	11.5411	Up	1.59252e-23	5.82977e-23
novel_mir5041	0	84	0.001	2.98	11.5411	Up	1.59252e-23	5.82505e-23
novel_mir4205	0	84	0.001	2.98	11.5411	Up	1.59252e-23	5.82034e-23
novel_mir5071	0	84	0.001	2.98	11.5411	Up	1.59252e-23	5.81564e-23
novel_mir1757	0	84	0.001	2.98	11.5411	Up	1.59252e-23	5.81095e-23
novel_mir1434	0	84	0.001	2.98	11.5411	Up	1.59252e-23	5.80626e-23
novel_mir676	0	84	0.001	2.98	11.5411	Up	1.59252e-23	5.80158e-23
novel_mir3052	0	84	0.001	2.98	11.5411	Up	1.59252e-23	5.79691e-23
novel_mir3324	0	83	0.001	2.94	11.5216	Up	2.9774e-23	1.07773e-22
novel_mir1055	0	83	0.001	2.94	11.5216	Up	2.9774e-23	1.07687e-22
novel_mir5611	0	83	0.001	2.94	11.5216	Up	2.9774e-23	1.07601e-22
novel_mir5878	0	83	0.001	2.94	11.5216	Up	2.9774e-23	1.07515e-22
novel_mir3617	0	83	0.001	2.94	11.5216	Up	2.9774e-23	1.07429e-22
novel_mir4134	0	83	0.001	2.94	11.5216	Up	2.9774e-23	1.07343e-22
novel_mir4090	0	83	0.001	2.94	11.5216	Up	2.9774e-23	1.07258e-22
novel_mir557	0	83	0.001	2.94	11.5216	Up	2.9774e-23	1.07172e-22
novel_mir1314	0	83	0.001	2.94	11.5216	Up	2.9774e-23	1.07087e-22
novel_mir2364	0	83	0.001	2.94	11.5216	Up	2.9774e-23	1.07002e-22
novel_mir1812	0	83	0.001	2.94	11.5216	Up	2.9774e-23	1.06917e-22
novel_mir643	0	82	0.001	2.91	11.5068	Up	5.56658e-23	1.99102e-22
novel_mir2814	0	82	0.001	2.91	11.5068	Up	5.56658e-23	1.98945e-22
novel_mir5752	0	82	0.001	2.91	11.5068	Up	5.56658e-23	1.98788e-22
novel_mir4958	0	82	0.001	2.91	11.5068	Up	5.56658e-23	1.98631e-22
novel_mir2296	0	82	0.001	2.91	11.5068	Up	5.56658e-23	1.98474e-22
novel_mir3287	0	82	0.001	2.91	11.5068	Up	5.56658e-23	1.98318e-22
novel_mir3261	0	82	0.001	2.91	11.5068	Up	5.56658e-23	1.98161e-22
novel_mir2784	0	82	0.001	2.91	11.5068	Up	5.56658e-23	1.98006e-22
novel_mir2390	0	82	0.001	2.91	11.5068	Up	5.56658e-23	1.9785e-22
novel_mir2710	0	82	0.001	2.91	11.5068	Up	5.56658e-23	1.97694e-22
novel_mir1737	0	82	0.001	2.91	11.5068	Up	5.56658e-23	1.97539e-22
novel_mir5625	0	82	0.001	2.91	11.5068	Up	5.56658e-23	1.97384e-22
novel_mir3708	0	82	0.001	2.91	11.5068	Up	5.56658e-23	1.9723e-22
novel_mir3736	0	82	0.001	2.91	11.5068	Up	5.56658e-23	1.97075e-22
novel_mir5894	0	82	0.001	2.91	11.5068	Up	5.56658e-23	1.96921e-22
novel_mir4865	0	82	0.001	2.91	11.5068	Up	5.56658e-23	1.96767e-22
novel_mir121	0	81	0.001	2.87	11.4868	Up	1.04074e-22	3.66446e-22
novel_mir1080	0	81	0.001	2.87	11.4868	Up	1.04074e-22	3.66161e-22
novel_mir5610	0	81	0.001	2.87	11.4868	Up	1.04074e-22	3.65876e-22
novel_mir3199	0	81	0.001	2.87	11.4868	Up	1.04074e-22	3.65592e-22
novel_mir5069	0	81	0.001	2.87	11.4868	Up	1.04074e-22	3.65308e-22
novel_mir5913	0	81	0.001	2.87	11.4868	Up	1.04074e-22	3.65025e-22
novel_mir854	0	81	0.001	2.87	11.4868	Up	1.04074e-22	3.64742e-22
novel_mir559	0	81	0.001	2.87	11.4868	Up	1.04074e-22	3.64459e-22
novel_mir2594	0	81	0.001	2.87	11.4868	Up	1.04074e-22	3.64177e-22
novel_mir4423	0	81	0.001	2.87	11.4868	Up	1.04074e-22	3.63895e-22
novel_mir393	0	81	0.001	2.87	11.4868	Up	1.04074e-22	3.63614e-22
novel_mir4249	0	80	0.001	2.83	11.4666	Up	1.94578e-22	6.74088e-22
novel_mir5901	0	80	0.001	2.83	11.4666	Up	1.94578e-22	6.73572e-22
novel_mir790	0	80	0.001	2.83	11.4666	Up	1.94578e-22	6.73057e-22
novel_mir5090	0	80	0.001	2.83	11.4666	Up	1.94578e-22	6.72542e-22
novel_mir2775	0	80	0.001	2.83	11.4666	Up	1.94578e-22	6.72029e-22
novel_mir644	0	80	0.001	2.83	11.4666	Up	1.94578e-22	6.71516e-22
novel_mir3178	0	80	0.001	2.83	11.4666	Up	1.94578e-22	6.71003e-22
novel_mir38	0	80	0.001	2.83	11.4666	Up	1.94578e-22	6.70492e-22
novel_mir1662	0	80	0.001	2.83	11.4666	Up	1.94578e-22	6.69981e-22
novel_mir5163	0	80	0.001	2.83	11.4666	Up	1.94578e-22	6.69471e-22
novel_mir5077	0	80	0.001	2.83	11.4666	Up	1.94578e-22	6.68962e-22
novel_mir3361	0	80	0.001	2.83	11.4666	Up	1.94578e-22	6.68454e-22
novel_mir5279	0	80	0.001	2.83	11.4666	Up	1.94578e-22	6.67946e-22
novel_mir2276	0	80	0.001	2.83	11.4666	Up	1.94578e-22	6.6744e-22
novel_mir483	0	80	0.001	2.83	11.4666	Up	1.94578e-22	6.66934e-22
novel_mir3090	0	80	0.001	2.83	11.4666	Up	1.94578e-22	6.66428e-22
novel_mir5260	0	80	0.001	2.83	11.4666	Up	1.94578e-22	6.65924e-22
novel_mir4380	0	80	0.001	2.83	11.4666	Up	1.94578e-22	6.6542e-22
novel_mir517	0	80	0.001	2.83	11.4666	Up	1.94578e-22	6.64917e-22
novel_mir5948	0	80	0.001	2.83	11.4666	Up	1.94578e-22	6.64415e-22
novel_mir484	0	80	0.001	2.83	11.4666	Up	1.94578e-22	6.63913e-22
novel_mir870	0	80	0.001	2.83	11.4666	Up	1.94578e-22	6.63413e-22
novel_mir5498	0	80	0.001	2.83	11.4666	Up	1.94578e-22	6.62913e-22
novel_mir472	0	80	0.001	2.83	11.4666	Up	1.94578e-22	6.62414e-22
novel_mir324	0	80	0.001	2.83	11.4666	Up	1.94578e-22	6.61915e-22
novel_mir1169	0	80	0.001	2.83	11.4666	Up	1.94578e-22	6.61418e-22
novel_mir5003	0	80	0.001	2.83	11.4666	Up	1.94578e-22	6.60921e-22
novel_mir4030	0	80	0.001	2.83	11.4666	Up	1.94578e-22	6.60424e-22
novel_mir425	0	80	0.001	2.83	11.4666	Up	1.94578e-22	6.59929e-22
novel_mir4057	0	80	0.001	2.83	11.4666	Up	1.94578e-22	6.59434e-22
novel_mir2788	0	79	0.001	2.8	11.4512	Up	3.63786e-22	1.22646e-21
novel_mir5806	0	79	0.001	2.8	11.4512	Up	3.63786e-22	1.22554e-21
novel_mir1075	0	79	0.001	2.8	11.4512	Up	3.63786e-22	1.22463e-21
novel_mir3281	0	79	0.001	2.8	11.4512	Up	3.63786e-22	1.22372e-21
novel_mir2211	0	79	0.001	2.8	11.4512	Up	3.63786e-22	1.22281e-21
novel_mir2947	0	79	0.001	2.8	11.4512	Up	3.63786e-22	1.2219e-21
novel_mir873	0	79	0.001	2.8	11.4512	Up	3.63786e-22	1.22099e-21
novel_mir495	0	79	0.001	2.8	11.4512	Up	3.63786e-22	1.22009e-21
novel_mir69	0	79	0.001	2.8	11.4512	Up	3.63786e-22	1.21918e-21
novel_mir698	0	79	0.001	2.8	11.4512	Up	3.63786e-22	1.21828e-21
novel_mir500	0	79	0.001	2.8	11.4512	Up	3.63786e-22	1.21738e-21
mmu-miR-363-3p	0	79	0.001	2.8	11.4512	Up	3.63786e-22	1.21648e-21
novel_mir6148	0	79	0.001	2.8	11.4512	Up	3.63786e-22	1.21558e-21
novel_mir2726	0	79	0.001	2.8	11.4512	Up	3.63786e-22	1.21468e-21
novel_mir6081	0	79	0.001	2.8	11.4512	Up	3.63786e-22	1.21378e-21
novel_mir3186	0	79	0.001	2.8	11.4512	Up	3.63786e-22	1.21289e-21
novel_mir1835	0	79	0.001	2.8	11.4512	Up	3.63786e-22	1.21199e-21
novel_mir1886	0	79	0.001	2.8	11.4512	Up	3.63786e-22	1.2111e-21
novel_mir2058	0	79	0.001	2.8	11.4512	Up	3.63786e-22	1.21021e-21
novel_mir5476	0	79	0.001	2.8	11.4512	Up	3.63786e-22	1.20932e-21
novel_mir782	0	79	0.001	2.8	11.4512	Up	3.63786e-22	1.20843e-21
novel_mir5190	0	79	0.001	2.8	11.4512	Up	3.63786e-22	1.20755e-21
novel_mir4208	0	79	0.001	2.8	11.4512	Up	3.63786e-22	1.20666e-21
novel_mir853	0	79	0.001	2.8	11.4512	Up	3.63786e-22	1.20577e-21
novel_mir1888	0	79	0.001	2.8	11.4512	Up	3.63786e-22	1.20489e-21
novel_mir6064	0	79	0.001	2.8	11.4512	Up	3.63786e-22	1.20401e-21
novel_mir2021	0	79	0.001	2.8	11.4512	Up	3.63786e-22	1.20313e-21
novel_mir3376	0	79	0.001	2.8	11.4512	Up	3.63786e-22	1.20225e-21
novel_mir2644	0	78	0.001	2.76	11.4305	Up	6.80138e-22	2.23792e-21
novel_mir1148	0	78	0.001	2.76	11.4305	Up	6.80138e-22	2.23629e-21
novel_mir4893	0	78	0.001	2.76	11.4305	Up	6.80138e-22	2.23467e-21
novel_mir5437	0	78	0.001	2.76	11.4305	Up	6.80138e-22	2.23305e-21
novel_mir4023	0	78	0.001	2.76	11.4305	Up	6.80138e-22	2.23143e-21
novel_mir5748	0	78	0.001	2.76	11.4305	Up	6.80138e-22	2.22981e-21
novel_mir1081	0	78	0.001	2.76	11.4305	Up	6.80138e-22	2.22819e-21
novel_mir2929	0	78	0.001	2.76	11.4305	Up	6.80138e-22	2.22658e-21
novel_mir1614	0	78	0.001	2.76	11.4305	Up	6.80138e-22	2.22497e-21
novel_mir1705	0	78	0.001	2.76	11.4305	Up	6.80138e-22	2.22336e-21
novel_mir4628	0	78	0.001	2.76	11.4305	Up	6.80138e-22	2.22175e-21
novel_mir2448	0	78	0.001	2.76	11.4305	Up	6.80138e-22	2.22015e-21
novel_mir2628	0	78	0.001	2.76	11.4305	Up	6.80138e-22	2.21855e-21
novel_mir5066	0	78	0.001	2.76	11.4305	Up	6.80138e-22	2.21695e-21
novel_mir5033	0	78	0.001	2.76	11.4305	Up	6.80138e-22	2.21535e-21
novel_mir5160	0	78	0.001	2.76	11.4305	Up	6.80138e-22	2.21375e-21
novel_mir1588	0	78	0.001	2.76	11.4305	Up	6.80138e-22	2.21216e-21
novel_mir3205	0	78	0.001	2.76	11.4305	Up	6.80138e-22	2.21057e-21
novel_mir505	0	78	0.001	2.76	11.4305	Up	6.80138e-22	2.20898e-21
novel_mir5811	0	77	0.001	2.73	11.4147	Up	1.2716e-21	4.11517e-21
novel_mir5784	0	77	0.001	2.73	11.4147	Up	1.2716e-21	4.11223e-21
novel_mir832	0	77	0.001	2.73	11.4147	Up	1.2716e-21	4.10929e-21
novel_mir1128	0	77	0.001	2.73	11.4147	Up	1.2716e-21	4.10635e-21
novel_mir4636	0	77	0.001	2.73	11.4147	Up	1.2716e-21	4.10342e-21
novel_mir5239	0	77	0.001	2.73	11.4147	Up	1.2716e-21	4.1005e-21
novel_mir541	0	77	0.001	2.73	11.4147	Up	1.2716e-21	4.09757e-21
novel_mir681	0	77	0.001	2.73	11.4147	Up	1.2716e-21	4.09465e-21
novel_mir1364	0	77	0.001	2.73	11.4147	Up	1.2716e-21	4.09174e-21
novel_mir5120	0	77	0.001	2.73	11.4147	Up	1.2716e-21	4.08883e-21
novel_mir2385	0	77	0.001	2.73	11.4147	Up	1.2716e-21	4.08592e-21
novel_mir2876	0	77	0.001	2.73	11.4147	Up	1.2716e-21	4.08302e-21
novel_mir1254	0	77	0.001	2.73	11.4147	Up	1.2716e-21	4.08012e-21
novel_mir1581	0	76	0.001	2.69	11.3934	Up	2.3774e-21	7.60129e-21
novel_mir211	0	76	0.001	2.69	11.3934	Up	2.3774e-21	7.59592e-21
novel_mir5509	0	76	0.001	2.69	11.3934	Up	2.3774e-21	7.59055e-21
novel_mir3718	0	76	0.001	2.69	11.3934	Up	2.3774e-21	7.5852e-21
novel_mir5084	0	76	0.001	2.69	11.3934	Up	2.3774e-21	7.57985e-21
novel_mir3833	0	76	0.001	2.69	11.3934	Up	2.3774e-21	7.57451e-21
novel_mir445	0	76	0.001	2.69	11.3934	Up	2.3774e-21	7.56917e-21
novel_mir4227	0	76	0.001	2.69	11.3934	Up	2.3774e-21	7.56385e-21
novel_mir2227	0	76	0.001	2.69	11.3934	Up	2.3774e-21	7.55853e-21
novel_mir1042	0	76	0.001	2.69	11.3934	Up	2.3774e-21	7.55322e-21
novel_mir1277	0	76	0.001	2.69	11.3934	Up	2.3774e-21	7.54791e-21
novel_mir2807	0	75	0.001	2.66	11.3772	Up	4.44482e-21	1.40623e-20
novel_mir5699	0	75	0.001	2.66	11.3772	Up	4.44482e-21	1.40525e-20
novel_mir4921	0	75	0.001	2.66	11.3772	Up	4.44482e-21	1.40426e-20
novel_mir405	0	75	0.001	2.66	11.3772	Up	4.44482e-21	1.40328e-20
novel_mir423	0	75	0.001	2.66	11.3772	Up	4.44482e-21	1.40231e-20
novel_mir3673	0	75	0.001	2.66	11.3772	Up	4.44482e-21	1.40133e-20
novel_mir2440	0	75	0.001	2.66	11.3772	Up	4.44482e-21	1.40035e-20
novel_mir1729	0	75	0.001	2.66	11.3772	Up	4.44482e-21	1.39938e-20
novel_mir1655	0	75	0.001	2.66	11.3772	Up	4.44482e-21	1.3984e-20
novel_mir4905	0	75	0.001	2.66	11.3772	Up	4.44482e-21	1.39743e-20
novel_mir5480	0	75	0.001	2.66	11.3772	Up	4.44482e-21	1.39646e-20
novel_mir1591	0	75	0.001	2.66	11.3772	Up	4.44482e-21	1.39549e-20
novel_mir2517	0	75	0.001	2.66	11.3772	Up	4.44482e-21	1.39452e-20
novel_mir6070	0	75	0.001	2.66	11.3772	Up	4.44482e-21	1.39355e-20
novel_mir5650	0	75	0.001	2.66	11.3772	Up	4.44482e-21	1.39259e-20
novel_mir4074	0	74	0.001	2.62	11.3554	Up	8.31012e-21	2.59104e-20
novel_mir4438	0	74	0.001	2.62	11.3554	Up	8.31012e-21	2.58925e-20
novel_mir2590	0	74	0.001	2.62	11.3554	Up	8.31012e-21	2.58747e-20
novel_mir3616	0	74	0.001	2.62	11.3554	Up	8.31012e-21	2.58569e-20
novel_mir5384	0	74	0.001	2.62	11.3554	Up	8.31012e-21	2.58391e-20
novel_mir4780	0	74	0.001	2.62	11.3554	Up	8.31012e-21	2.58213e-20
novel_mir3709	0	74	0.001	2.62	11.3554	Up	8.31012e-21	2.58036e-20
novel_mir5798	0	74	0.001	2.62	11.3554	Up	8.31012e-21	2.57859e-20
novel_mir5560	0	74	0.001	2.62	11.3554	Up	8.31012e-21	2.57682e-20
novel_mir1124	0	74	0.001	2.62	11.3554	Up	8.31012e-21	2.57506e-20
novel_mir4159	0	74	0.001	2.62	11.3554	Up	8.31012e-21	2.57329e-20
novel_mir1185	0	74	0.001	2.62	11.3554	Up	8.31012e-21	2.57153e-20
novel_mir5924	0	74	0.001	2.62	11.3554	Up	8.31012e-21	2.56977e-20
novel_mir5786	0	73	0.001	2.59	11.3387	Up	1.55367e-20	4.78159e-20
novel_mir621	0	73	0.001	2.59	11.3387	Up	1.55367e-20	4.77833e-20
novel_mir5472	0	73	0.001	2.59	11.3387	Up	1.55367e-20	4.77509e-20
novel_mir5138	0	73	0.001	2.59	11.3387	Up	1.55367e-20	4.77184e-20
novel_mir2760	0	73	0.001	2.59	11.3387	Up	1.55367e-20	4.7686e-20
novel_mir4052	0	73	0.001	2.59	11.3387	Up	1.55367e-20	4.76537e-20
novel_mir2839	0	73	0.001	2.59	11.3387	Up	1.55367e-20	4.76214e-20
novel_mir3150	0	73	0.001	2.59	11.3387	Up	1.55367e-20	4.75891e-20
novel_mir3143	0	73	0.001	2.59	11.3387	Up	1.55367e-20	4.75569e-20
novel_mir5644	0	73	0.001	2.59	11.3387	Up	1.55367e-20	4.75247e-20
novel_mir2692	0	73	0.001	2.59	11.3387	Up	1.55367e-20	4.74926e-20
novel_mir447	0	73	0.001	2.59	11.3387	Up	1.55367e-20	4.74605e-20
novel_mir5335	0	73	0.001	2.59	11.3387	Up	1.55367e-20	4.74284e-20
novel_mir3299	0	73	0.001	2.59	11.3387	Up	1.55367e-20	4.73964e-20
novel_mir5624	0	73	0.001	2.59	11.3387	Up	1.55367e-20	4.73645e-20
novel_mir1775	0	73	0.001	2.59	11.3387	Up	1.55367e-20	4.73326e-20
novel_mir1341	0	73	0.001	2.59	11.3387	Up	1.55367e-20	4.73007e-20
novel_mir3279	0	73	0.001	2.59	11.3387	Up	1.55367e-20	4.72689e-20
novel_mir4069	0	72	0.001	2.55	11.3163	Up	2.90476e-20	8.78423e-20
novel_mir2156	0	72	0.001	2.55	11.3163	Up	2.90476e-20	8.77836e-20
novel_mir3461	0	72	0.001	2.55	11.3163	Up	2.90476e-20	8.77249e-20
novel_mir1287	0	72	0.001	2.55	11.3163	Up	2.90476e-20	8.76664e-20
novel_mir5876	0	72	0.001	2.55	11.3163	Up	2.90476e-20	8.76079e-20
novel_mir4764	0	72	0.001	2.55	11.3163	Up	2.90476e-20	8.75495e-20
novel_mir3695	0	72	0.001	2.55	11.3163	Up	2.90476e-20	8.74911e-20
novel_mir1512	0	72	0.001	2.55	11.3163	Up	2.90476e-20	8.74329e-20
novel_mir5932	0	72	0.001	2.55	11.3163	Up	2.90476e-20	8.73747e-20
novel_mir6155	0	72	0.001	2.55	11.3163	Up	2.90476e-20	8.73166e-20
novel_mir3269	0	72	0.001	2.55	11.3163	Up	2.90476e-20	8.72586e-20
novel_mir707	0	72	0.001	2.55	11.3163	Up	2.90476e-20	8.72007e-20
novel_mir911	0	72	0.001	2.55	11.3163	Up	2.90476e-20	8.71428e-20
novel_mir5429	0	72	0.001	2.55	11.3163	Up	2.90476e-20	8.7085e-20
novel_mir2049	0	72	0.001	2.55	11.3163	Up	2.90476e-20	8.70273e-20
novel_mir4450	0	72	0.001	2.55	11.3163	Up	2.90476e-20	8.69697e-20
novel_mir241	0	72	0.001	2.55	11.3163	Up	2.90476e-20	8.69121e-20
novel_mir2994	0	72	0.001	2.55	11.3163	Up	2.90476e-20	8.68546e-20
novel_mir5704	0	72	0.001	2.55	11.3163	Up	2.90476e-20	8.67972e-20
novel_mir120	0	72	0.001	2.55	11.3163	Up	2.90476e-20	8.67399e-20
novel_mir2730	0	72	0.001	2.55	11.3163	Up	2.90476e-20	8.66826e-20
novel_mir1177	0	71	0.001	2.52	11.2992	Up	5.4308e-20	1.61318e-19
novel_mir6039	0	71	0.001	2.52	11.2992	Up	5.4308e-20	1.61212e-19
novel_mir4536	0	71	0.001	2.52	11.2992	Up	5.4308e-20	1.61107e-19
novel_mir4697	0	71	0.001	2.52	11.2992	Up	5.4308e-20	1.61001e-19
novel_mir275	0	71	0.001	2.52	11.2992	Up	5.4308e-20	1.60895e-19
novel_mir2554	0	71	0.001	2.52	11.2992	Up	5.4308e-20	1.6079e-19
novel_mir4588	0	71	0.001	2.52	11.2992	Up	5.4308e-20	1.60685e-19
novel_mir4282	0	71	0.001	2.52	11.2992	Up	5.4308e-20	1.6058e-19
novel_mir5461	0	71	0.001	2.52	11.2992	Up	5.4308e-20	1.60475e-19
novel_mir2816	0	71	0.001	2.52	11.2992	Up	5.4308e-20	1.6037e-19
novel_mir3753	0	71	0.001	2.52	11.2992	Up	5.4308e-20	1.60265e-19
novel_mir3136	0	71	0.001	2.52	11.2992	Up	5.4308e-20	1.60161e-19
novel_mir1409	0	71	0.001	2.52	11.2992	Up	5.4308e-20	1.60056e-19
novel_mir2131	0	71	0.001	2.52	11.2992	Up	5.4308e-20	1.59952e-19
novel_mir4127	0	71	0.001	2.52	11.2992	Up	5.4308e-20	1.59848e-19
novel_mir325	0	71	0.001	2.52	11.2992	Up	5.4308e-20	1.59744e-19
novel_mir1449	0	71	0.001	2.52	11.2992	Up	5.4308e-20	1.5964e-19
novel_mir2823	0	71	0.001	2.52	11.2992	Up	5.4308e-20	1.59536e-19
novel_mir4979	0	71	0.001	2.52	11.2992	Up	5.4308e-20	1.59433e-19
novel_mir2875	0	71	0.001	2.52	11.2992	Up	5.4308e-20	1.59329e-19
novel_mir3778	0	71	0.001	2.52	11.2992	Up	5.4308e-20	1.59226e-19
novel_mir5923	0	70	0.001	2.48	11.2761	Up	1.01535e-19	2.96155e-19
novel_mir3160	0	70	0.001	2.48	11.2761	Up	1.01535e-19	2.95964e-19
novel_mir2408	0	70	0.001	2.48	11.2761	Up	1.01535e-19	2.95773e-19
novel_mir2332	0	70	0.001	2.48	11.2761	Up	1.01535e-19	2.95583e-19
novel_mir3458	0	70	0.001	2.48	11.2761	Up	1.01535e-19	2.95392e-19
novel_mir1480	0	70	0.001	2.48	11.2761	Up	1.01535e-19	2.95202e-19
novel_mir1426	0	70	0.001	2.48	11.2761	Up	1.01535e-19	2.95013e-19
novel_mir3304	0	70	0.001	2.48	11.2761	Up	1.01535e-19	2.94823e-19
novel_mir6130	0	70	0.001	2.48	11.2761	Up	1.01535e-19	2.94634e-19
novel_mir2825	0	70	0.001	2.48	11.2761	Up	1.01535e-19	2.94445e-19
novel_mir4677	0	70	0.001	2.48	11.2761	Up	1.01535e-19	2.94256e-19
novel_mir4684	0	70	0.001	2.48	11.2761	Up	1.01535e-19	2.94068e-19
novel_mir2666	0	70	0.001	2.48	11.2761	Up	1.01535e-19	2.93879e-19
novel_mir4483	0	70	0.001	2.48	11.2761	Up	1.01535e-19	2.93691e-19
novel_mir5774	0	70	0.001	2.48	11.2761	Up	1.01535e-19	2.93504e-19
novel_mir5859	0	69	0.001	2.45	11.2586	Up	1.89832e-19	5.46642e-19
novel_mir506	0	69	0.001	2.45	11.2586	Up	1.89832e-19	5.46295e-19
novel_mir661	0	69	0.001	2.45	11.2586	Up	1.89832e-19	5.45947e-19
mmu-miR-669b-5p	0	69	0.001	2.45	11.2586	Up	1.89832e-19	5.456e-19
novel_mir2617	0	69	0.001	2.45	11.2586	Up	1.89832e-19	5.45253e-19
novel_mir5272	0	69	0.001	2.45	11.2586	Up	1.89832e-19	5.44907e-19
novel_mir3156	0	69	0.001	2.45	11.2586	Up	1.89832e-19	5.44561e-19
novel_mir5547	0	69	0.001	2.45	11.2586	Up	1.89832e-19	5.44216e-19
novel_mir4288	0	69	0.001	2.45	11.2586	Up	1.89832e-19	5.43871e-19
novel_mir5211	0	69	0.001	2.45	11.2586	Up	1.89832e-19	5.43527e-19
novel_mir1197	0	69	0.001	2.45	11.2586	Up	1.89832e-19	5.43183e-19
novel_mir1184	0	69	0.001	2.45	11.2586	Up	1.89832e-19	5.42839e-19
novel_mir6043	0	69	0.001	2.45	11.2586	Up	1.89832e-19	5.42496e-19
novel_mir5250	0	69	0.001	2.45	11.2586	Up	1.89832e-19	5.42153e-19
novel_mir3982	0	69	0.001	2.45	11.2586	Up	1.89832e-19	5.41811e-19
novel_mir3599	0	69	0.001	2.45	11.2586	Up	1.89832e-19	5.41469e-19
novel_mir4804	0	69	0.001	2.45	11.2586	Up	1.89832e-19	5.41128e-19
novel_mir3301	0	69	0.001	2.45	11.2586	Up	1.89832e-19	5.40787e-19
novel_mir2497	0	69	0.001	2.45	11.2586	Up	1.89832e-19	5.40446e-19
novel_mir5592	0	69	0.001	2.45	11.2586	Up	1.89832e-19	5.40106e-19
novel_mir2600	0	69	0.001	2.45	11.2586	Up	1.89832e-19	5.39766e-19
novel_mir674	0	69	0.001	2.45	11.2586	Up	1.89832e-19	5.39427e-19
novel_mir4002	0	69	0.001	2.45	11.2586	Up	1.89832e-19	5.39088e-19
novel_mir1458	0	69	0.001	2.45	11.2586	Up	1.89832e-19	5.3875e-19
novel_mir899	0	69	0.001	2.45	11.2586	Up	1.89832e-19	5.38412e-19
novel_mir4584	0	69	0.001	2.45	11.2586	Up	1.89832e-19	5.38074e-19
novel_mir1461	0	69	0.001	2.45	11.2586	Up	1.89832e-19	5.37737e-19
novel_mir5513	0	69	0.001	2.45	11.2586	Up	1.89832e-19	5.37401e-19
novel_mir5396	0	69	0.001	2.45	11.2586	Up	1.89832e-19	5.37064e-19
novel_mir1771	0	68	0.001	2.41	11.2348	Up	3.54912e-19	9.99102e-19
novel_mir4014	0	68	0.001	2.41	11.2348	Up	3.54912e-19	9.9848e-19
novel_mir1769	0	68	0.001	2.41	11.2348	Up	3.54912e-19	9.97859e-19
novel_mir498	0	68	0.001	2.41	11.2348	Up	3.54912e-19	9.97239e-19
novel_mir2449	0	68	0.001	2.41	11.2348	Up	3.54912e-19	9.96619e-19
novel_mir1986	0	68	0.001	2.41	11.2348	Up	3.54912e-19	9.96001e-19
novel_mir1116	0	68	0.001	2.41	11.2348	Up	3.54912e-19	9.95383e-19
novel_mir5320	0	68	0.001	2.41	11.2348	Up	3.54912e-19	9.94766e-19
novel_mir5860	0	68	0.001	2.41	11.2348	Up	3.54912e-19	9.94149e-19
novel_mir3249	0	68	0.001	2.41	11.2348	Up	3.54912e-19	9.93534e-19
novel_mir2822	0	68	0.001	2.41	11.2348	Up	3.54912e-19	9.92919e-19
novel_mir5134	0	68	0.001	2.41	11.2348	Up	3.54912e-19	9.92305e-19
novel_mir726	0	68	0.001	2.41	11.2348	Up	3.54912e-19	9.91692e-19
novel_mir61	0	68	0.001	2.41	11.2348	Up	3.54912e-19	9.91079e-19
novel_mir2302	0	68	0.001	2.41	11.2348	Up	3.54912e-19	9.90467e-19
novel_mir1284	0	68	0.001	2.41	11.2348	Up	3.54912e-19	9.89856e-19
novel_mir2425	0	68	0.001	2.41	11.2348	Up	3.54912e-19	9.89246e-19
novel_mir2932	0	68	0.001	2.41	11.2348	Up	3.54912e-19	9.88637e-19
novel_mir4565	0	68	0.001	2.41	11.2348	Up	3.54912e-19	9.88028e-19
novel_mir6042	0	68	0.001	2.41	11.2348	Up	3.54912e-19	9.8742e-19
novel_mir4709	0	67	0.001	2.37	11.2107	Up	6.6355e-19	1.83705e-18
novel_mir2638	0	67	0.001	2.37	11.2107	Up	6.6355e-19	1.83593e-18
novel_mir6091	0	67	0.001	2.37	11.2107	Up	6.6355e-19	1.83481e-18
novel_mir5182	0	67	0.001	2.37	11.2107	Up	6.6355e-19	1.83369e-18
novel_mir2909	0	67	0.001	2.37	11.2107	Up	6.6355e-19	1.83257e-18
novel_mir3897	0	67	0.001	2.37	11.2107	Up	6.6355e-19	1.83145e-18
novel_mir1965	0	67	0.001	2.37	11.2107	Up	6.6355e-19	1.83033e-18
novel_mir5214	0	67	0.001	2.37	11.2107	Up	6.6355e-19	1.82921e-18
novel_mir2275	0	67	0.001	2.37	11.2107	Up	6.6355e-19	1.8281e-18
mmu-miR-674-3p	0	67	0.001	2.37	11.2107	Up	6.6355e-19	1.82699e-18
novel_mir117	0	67	0.001	2.37	11.2107	Up	6.6355e-19	1.82587e-18
novel_mir5121	0	67	0.001	2.37	11.2107	Up	6.6355e-19	1.82476e-18
novel_mir5504	0	67	0.001	2.37	11.2107	Up	6.6355e-19	1.82365e-18
novel_mir1313	0	67	0.001	2.37	11.2107	Up	6.6355e-19	1.82255e-18
novel_mir3729	0	67	0.001	2.37	11.2107	Up	6.6355e-19	1.82144e-18
novel_mir5539	0	67	0.001	2.37	11.2107	Up	6.6355e-19	1.82033e-18
novel_mir2718	0	67	0.001	2.37	11.2107	Up	6.6355e-19	1.81923e-18
novel_mir2020	0	67	0.001	2.37	11.2107	Up	6.6355e-19	1.81813e-18
novel_mir4694	0	67	0.001	2.37	11.2107	Up	6.6355e-19	1.81703e-18
novel_mir2059	0	66	0.001	2.34	11.1923	Up	1.24058e-18	3.38483e-18
novel_mir6104	0	66	0.001	2.34	11.1923	Up	1.24058e-18	3.38279e-18
novel_mir2154	0	66	0.001	2.34	11.1923	Up	1.24058e-18	3.38075e-18
novel_mir4316	0	66	0.001	2.34	11.1923	Up	1.24058e-18	3.37872e-18
novel_mir5149	0	66	0.001	2.34	11.1923	Up	1.24058e-18	3.37668e-18
novel_mir2357	0	66	0.001	2.34	11.1923	Up	1.24058e-18	3.37465e-18
novel_mir3087	0	66	0.001	2.34	11.1923	Up	1.24058e-18	3.37262e-18
novel_mir6136	0	66	0.001	2.34	11.1923	Up	1.24058e-18	3.3706e-18
novel_mir5605	0	66	0.001	2.34	11.1923	Up	1.24058e-18	3.36857e-18
novel_mir3033	0	66	0.001	2.34	11.1923	Up	1.24058e-18	3.36655e-18
novel_mir1402	0	66	0.001	2.34	11.1923	Up	1.24058e-18	3.36453e-18
novel_mir1643	0	66	0.001	2.34	11.1923	Up	1.24058e-18	3.36251e-18
novel_mir4785	0	66	0.001	2.34	11.1923	Up	1.24058e-18	3.3605e-18
novel_mir2082	0	66	0.001	2.34	11.1923	Up	1.24058e-18	3.35849e-18
novel_mir6022	0	66	0.001	2.34	11.1923	Up	1.24058e-18	3.35648e-18
novel_mir2450	0	66	0.001	2.34	11.1923	Up	1.24058e-18	3.35447e-18
novel_mir4477	0	66	0.001	2.34	11.1923	Up	1.24058e-18	3.35246e-18
novel_mir4569	0	66	0.001	2.34	11.1923	Up	1.24058e-18	3.35046e-18
novel_mir3419	0	66	0.001	2.34	11.1923	Up	1.24058e-18	3.34846e-18
novel_mir5109	0	66	0.001	2.34	11.1923	Up	1.24058e-18	3.34646e-18
novel_mir370	0	66	0.001	2.34	11.1923	Up	1.24058e-18	3.34447e-18
novel_mir2340	0	66	0.001	2.34	11.1923	Up	1.24058e-18	3.34247e-18
novel_mir4605	0	66	0.001	2.34	11.1923	Up	1.24058e-18	3.34048e-18
novel_mir4362	0	65	0.001	2.3	11.1674	Up	2.31942e-18	6.2232e-18
novel_mir4702	0	65	0.001	2.3	11.1674	Up	2.31942e-18	6.21951e-18
novel_mir2140	0	65	0.001	2.3	11.1674	Up	2.31942e-18	6.21583e-18
novel_mir5356	0	65	0.001	2.3	11.1674	Up	2.31942e-18	6.21214e-18
novel_mir2456	0	65	0.001	2.3	11.1674	Up	2.31942e-18	6.20847e-18
novel_mir4875	0	65	0.001	2.3	11.1674	Up	2.31942e-18	6.20479e-18
novel_mir5393	0	65	0.001	2.3	11.1674	Up	2.31942e-18	6.20112e-18
novel_mir2528	0	65	0.001	2.3	11.1674	Up	2.31942e-18	6.19746e-18
novel_mir408	0	65	0.001	2.3	11.1674	Up	2.31942e-18	6.1938e-18
novel_mir1721	0	65	0.001	2.3	11.1674	Up	2.31942e-18	6.19014e-18
novel_mir3408	0	65	0.001	2.3	11.1674	Up	2.31942e-18	6.18649e-18
novel_mir2487	0	65	0.001	2.3	11.1674	Up	2.31942e-18	6.18284e-18
novel_mir1322	0	65	0.001	2.3	11.1674	Up	2.31942e-18	6.1792e-18
novel_mir209	0	65	0.001	2.3	11.1674	Up	2.31942e-18	6.17556e-18
novel_mir953	0	65	0.001	2.3	11.1674	Up	2.31942e-18	6.17192e-18
novel_mir936	0	65	0.001	2.3	11.1674	Up	2.31942e-18	6.16829e-18
novel_mir5759	0	65	0.001	2.3	11.1674	Up	2.31942e-18	6.16467e-18
novel_mir1656	0	64	0.001	2.27	11.1485	Up	4.3364e-18	1.1485e-17
novel_mir1964	0	64	0.001	2.27	11.1485	Up	4.3364e-18	1.14783e-17
novel_mir4015	0	64	0.001	2.27	11.1485	Up	4.3364e-18	1.14715e-17
novel_mir4822	0	64	0.001	2.27	11.1485	Up	4.3364e-18	1.14648e-17
novel_mir5414	0	64	0.001	2.27	11.1485	Up	4.3364e-18	1.14581e-17
novel_mir5400	0	64	0.001	2.27	11.1485	Up	4.3364e-18	1.14514e-17
novel_mir948	0	64	0.001	2.27	11.1485	Up	4.3364e-18	1.14448e-17
novel_mir6102	0	64	0.001	2.27	11.1485	Up	4.3364e-18	1.14381e-17
novel_mir5898	0	64	0.001	2.27	11.1485	Up	4.3364e-18	1.14314e-17
novel_mir4308	0	64	0.001	2.27	11.1485	Up	4.3364e-18	1.14247e-17
novel_mir3005	0	64	0.001	2.27	11.1485	Up	4.3364e-18	1.14181e-17
novel_mir3135	0	64	0.001	2.27	11.1485	Up	4.3364e-18	1.14114e-17
novel_mir5896	0	64	0.001	2.27	11.1485	Up	4.3364e-18	1.14048e-17
novel_mir2365	0	64	0.001	2.27	11.1485	Up	4.3364e-18	1.13982e-17
novel_mir3760	0	64	0.001	2.27	11.1485	Up	4.3364e-18	1.13916e-17
novel_mir1651	0	64	0.001	2.27	11.1485	Up	4.3364e-18	1.13849e-17
novel_mir3701	0	64	0.001	2.27	11.1485	Up	4.3364e-18	1.13783e-17
novel_mir5381	0	64	0.001	2.27	11.1485	Up	4.3364e-18	1.13717e-17
novel_mir6142	0	63	0.001	2.23	11.1228	Up	8.10742e-18	2.11626e-17
novel_mir976	0	63	0.001	2.23	11.1228	Up	8.10742e-18	2.11504e-17
novel_mir1469	0	63	0.001	2.23	11.1228	Up	8.10742e-18	2.11382e-17
novel_mir3846	0	63	0.001	2.23	11.1228	Up	8.10742e-18	2.1126e-17
novel_mir4619	0	63	0.001	2.23	11.1228	Up	8.10742e-18	2.11139e-17
novel_mir4024	0	63	0.001	2.23	11.1228	Up	8.10742e-18	2.11017e-17
novel_mir3069	0	63	0.001	2.23	11.1228	Up	8.10742e-18	2.10896e-17
novel_mir1490	0	63	0.001	2.23	11.1228	Up	8.10742e-18	2.10774e-17
novel_mir3741	0	63	0.001	2.23	11.1228	Up	8.10742e-18	2.10653e-17
novel_mir2192	0	63	0.001	2.23	11.1228	Up	8.10742e-18	2.10532e-17
novel_mir5454	0	63	0.001	2.23	11.1228	Up	8.10742e-18	2.10411e-17
novel_mir3819	0	63	0.001	2.23	11.1228	Up	8.10742e-18	2.10291e-17
novel_mir1715	0	63	0.001	2.23	11.1228	Up	8.10742e-18	2.1017e-17
novel_mir5546	0	63	0.001	2.23	11.1228	Up	8.10742e-18	2.1005e-17
novel_mir2869	0	63	0.001	2.23	11.1228	Up	8.10742e-18	2.09929e-17
novel_mir4260	0	63	0.001	2.23	11.1228	Up	8.10742e-18	2.09809e-17
novel_mir4917	0	63	0.001	2.23	11.1228	Up	8.10742e-18	2.09689e-17
novel_mir3403	0	63	0.001	2.23	11.1228	Up	8.10742e-18	2.09569e-17
novel_mir1595	0	62	0.001	2.2	11.1033	Up	1.51577e-17	3.89143e-17
novel_mir6107	0	62	0.001	2.2	11.1033	Up	1.51577e-17	3.88922e-17
novel_mir1587	0	62	0.001	2.2	11.1033	Up	1.51577e-17	3.88702e-17
novel_mir5238	0	62	0.001	2.2	11.1033	Up	1.51577e-17	3.88482e-17
novel_mir1874	0	62	0.001	2.2	11.1033	Up	1.51577e-17	3.88261e-17
novel_mir1465	0	62	0.001	2.2	11.1033	Up	1.51577e-17	3.88042e-17
novel_mir5966	0	62	0.001	2.2	11.1033	Up	1.51577e-17	3.87822e-17
novel_mir2024	0	62	0.001	2.2	11.1033	Up	1.51577e-17	3.87603e-17
novel_mir6057	0	62	0.001	2.2	11.1033	Up	1.51577e-17	3.87384e-17
novel_mir2248	0	62	0.001	2.2	11.1033	Up	1.51577e-17	3.87165e-17
novel_mir5188	0	62	0.001	2.2	11.1033	Up	1.51577e-17	3.86946e-17
novel_mir4041	0	62	0.001	2.2	11.1033	Up	1.51577e-17	3.86728e-17
novel_mir224	0	62	0.001	2.2	11.1033	Up	1.51577e-17	3.8651e-17
novel_mir2944	0	62	0.001	2.2	11.1033	Up	1.51577e-17	3.86292e-17
novel_mir2934	0	62	0.001	2.2	11.1033	Up	1.51577e-17	3.86074e-17
novel_mir5394	0	62	0.001	2.2	11.1033	Up	1.51577e-17	3.85857e-17
novel_mir526	0	62	0.001	2.2	11.1033	Up	1.51577e-17	3.8564e-17
novel_mir6131	0	62	0.001	2.2	11.1033	Up	1.51577e-17	3.85423e-17
novel_mir861	0	62	0.001	2.2	11.1033	Up	1.51577e-17	3.85206e-17
novel_mir3079	0	62	0.001	2.2	11.1033	Up	1.51577e-17	3.8499e-17
novel_mir1478	0	62	0.001	2.2	11.1033	Up	1.51577e-17	3.84773e-17
novel_mir4598	0	62	0.001	2.2	11.1033	Up	1.51577e-17	3.84557e-17
novel_mir3355	0	62	0.001	2.2	11.1033	Up	1.51577e-17	3.84342e-17
novel_mir1586	0	62	0.001	2.2	11.1033	Up	1.51577e-17	3.84126e-17
novel_mir3445	0	62	0.001	2.2	11.1033	Up	1.51577e-17	3.83911e-17
novel_mir3236	0	62	0.001	2.2	11.1033	Up	1.51577e-17	3.83696e-17
novel_mir754	0	61	0.001	2.16	11.0768	Up	2.83392e-17	7.12182e-17
novel_mir2616	0	61	0.001	2.16	11.0768	Up	2.83392e-17	7.11786e-17
novel_mir994	0	61	0.001	2.16	11.0768	Up	2.83392e-17	7.11391e-17
novel_mir2469	0	61	0.001	2.16	11.0768	Up	2.83392e-17	7.10996e-17
mmu-miR-134-5p	0	61	0.001	2.16	11.0768	Up	2.83392e-17	7.10602e-17
novel_mir5734	0	61	0.001	2.16	11.0768	Up	2.83392e-17	7.10208e-17
novel_mir2928	0	61	0.001	2.16	11.0768	Up	2.83392e-17	7.09815e-17
novel_mir4560	0	61	0.001	2.16	11.0768	Up	2.83392e-17	7.09422e-17
novel_mir5008	0	61	0.001	2.16	11.0768	Up	2.83392e-17	7.09029e-17
novel_mir608	0	61	0.001	2.16	11.0768	Up	2.83392e-17	7.08637e-17
novel_mir3144	0	61	0.001	2.16	11.0768	Up	2.83392e-17	7.08245e-17
novel_mir2504	0	61	0.001	2.16	11.0768	Up	2.83392e-17	7.07854e-17
novel_mir5246	0	61	0.001	2.16	11.0768	Up	2.83392e-17	7.07463e-17
novel_mir3453	0	61	0.001	2.16	11.0768	Up	2.83392e-17	7.07072e-17
novel_mir715	0	61	0.001	2.16	11.0768	Up	2.83392e-17	7.06682e-17
novel_mir68	0	61	0.001	2.16	11.0768	Up	2.83392e-17	7.06293e-17
novel_mir1457	0	61	0.001	2.16	11.0768	Up	2.83392e-17	7.05904e-17
novel_mir4347	0	61	0.001	2.16	11.0768	Up	2.83392e-17	7.05515e-17
novel_mir1366	0	61	0.001	2.16	11.0768	Up	2.83392e-17	7.05127e-17
novel_mir5100	0	61	0.001	2.16	11.0768	Up	2.83392e-17	7.04739e-17
novel_mir1274	0	60	0.001	2.13	11.0566	Up	5.29834e-17	1.30681e-16
novel_mir3019	0	60	0.001	2.13	11.0566	Up	5.29834e-17	1.3061e-16
novel_mir1240	0	60	0.001	2.13	11.0566	Up	5.29834e-17	1.30538e-16
novel_mir5809	0	60	0.001	2.13	11.0566	Up	5.29834e-17	1.30467e-16
mmu-miR-142a-3p	0	60	0.001	2.13	11.0566	Up	5.29834e-17	1.30396e-16
novel_mir2831	0	60	0.001	2.13	11.0566	Up	5.29834e-17	1.30325e-16
novel_mir4723	0	60	0.001	2.13	11.0566	Up	5.29834e-17	1.30254e-16
novel_mir3585	0	60	0.001	2.13	11.0566	Up	5.29834e-17	1.30184e-16
novel_mir2149	0	60	0.001	2.13	11.0566	Up	5.29834e-17	1.30113e-16
novel_mir5387	0	60	0.001	2.13	11.0566	Up	5.29834e-17	1.30042e-16
novel_mir4968	0	60	0.001	2.13	11.0566	Up	5.29834e-17	1.29972e-16
novel_mir4834	0	60	0.001	2.13	11.0566	Up	5.29834e-17	1.29901e-16
novel_mir2085	0	60	0.001	2.13	11.0566	Up	5.29834e-17	1.29831e-16
novel_mir459	0	60	0.001	2.13	11.0566	Up	5.29834e-17	1.29761e-16
novel_mir5045	0	60	0.001	2.13	11.0566	Up	5.29834e-17	1.2969e-16
novel_mir5218	0	60	0.001	2.13	11.0566	Up	5.29834e-17	1.2962e-16
novel_mir4567	0	59	0.001	2.09	11.0293	Up	9.90584e-17	2.41035e-16
novel_mir5922	0	59	0.001	2.09	11.0293	Up	9.90584e-17	2.40905e-16
novel_mir4307	0	59	0.001	2.09	11.0293	Up	9.90584e-17	2.40776e-16
novel_mir5851	0	59	0.001	2.09	11.0293	Up	9.90584e-17	2.40646e-16
novel_mir5540	0	59	0.001	2.09	11.0293	Up	9.90584e-17	2.40517e-16
novel_mir2873	0	59	0.001	2.09	11.0293	Up	9.90584e-17	2.40388e-16
novel_mir3806	0	59	0.001	2.09	11.0293	Up	9.90584e-17	2.40259e-16
novel_mir5056	0	59	0.001	2.09	11.0293	Up	9.90584e-17	2.4013e-16
novel_mir4768	0	59	0.001	2.09	11.0293	Up	9.90584e-17	2.40002e-16
novel_mir5313	0	59	0.001	2.09	11.0293	Up	9.90584e-17	2.39873e-16
novel_mir5961	0	59	0.001	2.09	11.0293	Up	9.90584e-17	2.39745e-16
novel_mir5005	0	59	0.001	2.09	11.0293	Up	9.90584e-17	2.39616e-16
novel_mir511	0	59	0.001	2.09	11.0293	Up	9.90584e-17	2.39488e-16
novel_mir4936	0	59	0.001	2.09	11.0293	Up	9.90584e-17	2.3936e-16
novel_mir1154	0	59	0.001	2.09	11.0293	Up	9.90584e-17	2.39232e-16
novel_mir77	0	59	0.001	2.09	11.0293	Up	9.90584e-17	2.39105e-16
novel_mir4741	0	59	0.001	2.09	11.0293	Up	9.90584e-17	2.38977e-16
novel_mir162	0	59	0.001	2.09	11.0293	Up	9.90584e-17	2.3885e-16
novel_mir1091	0	59	0.001	2.09	11.0293	Up	9.90584e-17	2.38722e-16
novel_mir5556	0	58	0.001	2.06	11.0084	Up	1.85201e-16	4.43953e-16
novel_mir5810	0	58	0.001	2.06	11.0084	Up	1.85201e-16	4.43717e-16
novel_mir1188	0	58	0.001	2.06	11.0084	Up	1.85201e-16	4.43482e-16
novel_mir5721	0	58	0.001	2.06	11.0084	Up	1.85201e-16	4.43248e-16
novel_mir2280	0	58	0.001	2.06	11.0084	Up	1.85201e-16	4.43013e-16
novel_mir980	0	58	0.001	2.06	11.0084	Up	1.85201e-16	4.42779e-16
novel_mir4323	0	58	0.001	2.06	11.0084	Up	1.85201e-16	4.42545e-16
novel_mir3021	0	58	0.001	2.06	11.0084	Up	1.85201e-16	4.42311e-16
novel_mir3883	0	58	0.001	2.06	11.0084	Up	1.85201e-16	4.42077e-16
novel_mir1300	0	58	0.001	2.06	11.0084	Up	1.85201e-16	4.41844e-16
novel_mir2769	0	58	0.001	2.06	11.0084	Up	1.85201e-16	4.41611e-16
novel_mir2319	0	58	0.001	2.06	11.0084	Up	1.85201e-16	4.41378e-16
novel_mir3081	0	58	0.001	2.06	11.0084	Up	1.85201e-16	4.41146e-16
novel_mir2821	0	58	0.001	2.06	11.0084	Up	1.85201e-16	4.40913e-16
novel_mir4096	0	58	0.001	2.06	11.0084	Up	1.85201e-16	4.40681e-16
novel_mir2214	0	58	0.001	2.06	11.0084	Up	1.85201e-16	4.4045e-16
novel_mir4210	0	58	0.001	2.06	11.0084	Up	1.85201e-16	4.40218e-16
novel_mir5951	0	58	0.001	2.06	11.0084	Up	1.85201e-16	4.39987e-16
novel_mir2880	0	58	0.001	2.06	11.0084	Up	1.85201e-16	4.39756e-16
novel_mir3839	0	58	0.001	2.06	11.0084	Up	1.85201e-16	4.39525e-16
novel_mir2612	0	58	0.001	2.06	11.0084	Up	1.85201e-16	4.39294e-16
novel_mir3512	0	58	0.001	2.06	11.0084	Up	1.85201e-16	4.39064e-16
novel_mir2153	0	58	0.001	2.06	11.0084	Up	1.85201e-16	4.38834e-16
novel_mir1746	0	58	0.001	2.06	11.0084	Up	1.85201e-16	4.38604e-16
novel_mir4147	0	58	0.001	2.06	11.0084	Up	1.85201e-16	4.38374e-16
novel_mir2812	0	58	0.001	2.06	11.0084	Up	1.85201e-16	4.38145e-16
novel_mir1194	0	58	0.001	2.06	11.0084	Up	1.85201e-16	4.37916e-16
novel_mir1195	0	57	0.001	2.02	10.9801	Up	3.46256e-16	8.1363e-16
novel_mir5126	0	57	0.001	2.02	10.9801	Up	3.46256e-16	8.13207e-16
novel_mir2324	0	57	0.001	2.02	10.9801	Up	3.46256e-16	8.12785e-16
novel_mir4270	0	57	0.001	2.02	10.9801	Up	3.46256e-16	8.12363e-16
novel_mir4285	0	57	0.001	2.02	10.9801	Up	3.46256e-16	8.11942e-16
novel_mir3663	0	57	0.001	2.02	10.9801	Up	3.46256e-16	8.11521e-16
novel_mir2572	0	57	0.001	2.02	10.9801	Up	3.46256e-16	8.111e-16
novel_mir5193	0	57	0.001	2.02	10.9801	Up	3.46256e-16	8.1068e-16
novel_mir3372	0	57	0.001	2.02	10.9801	Up	3.46256e-16	8.10261e-16
novel_mir4178	0	57	0.001	2.02	10.9801	Up	3.46256e-16	8.09841e-16
novel_mir636	0	57	0.001	2.02	10.9801	Up	3.46256e-16	8.09423e-16
novel_mir5619	0	57	0.001	2.02	10.9801	Up	3.46256e-16	8.09004e-16
novel_mir2894	0	57	0.001	2.02	10.9801	Up	3.46256e-16	8.08586e-16
novel_mir1260	0	57	0.001	2.02	10.9801	Up	3.46256e-16	8.08169e-16
novel_mir5455	0	57	0.001	2.02	10.9801	Up	3.46256e-16	8.07752e-16
novel_mir770	0	57	0.001	2.02	10.9801	Up	3.46256e-16	8.07335e-16
novel_mir1855	0	57	0.001	2.02	10.9801	Up	3.46256e-16	8.06919e-16
novel_mir2738	0	57	0.001	2.02	10.9801	Up	3.46256e-16	8.06504e-16
novel_mir937	0	57	0.001	2.02	10.9801	Up	3.46256e-16	8.06088e-16
novel_mir3013	0	57	0.001	2.02	10.9801	Up	3.46256e-16	8.05673e-16
novel_mir2033	0	57	0.001	2.02	10.9801	Up	3.46256e-16	8.05259e-16
novel_mir4832	0	57	0.001	2.02	10.9801	Up	3.46256e-16	8.04845e-16
novel_mir840	0	57	0.001	2.02	10.9801	Up	3.46256e-16	8.04431e-16
novel_mir1725	0	57	0.001	2.02	10.9801	Up	3.46256e-16	8.04018e-16
novel_mir1137	0	57	0.001	2.02	10.9801	Up	3.46256e-16	8.03605e-16
novel_mir979	0	57	0.001	2.02	10.9801	Up	3.46256e-16	8.03193e-16
novel_mir4553	0	57	0.001	2.02	10.9801	Up	3.46256e-16	8.02781e-16
novel_mir4255	0	56	0.001	1.98	10.9513	Up	6.47364e-16	1.49247e-15
novel_mir2957	0	56	0.001	1.98	10.9513	Up	6.47364e-16	1.49171e-15
novel_mir615	0	56	0.001	1.98	10.9513	Up	6.47364e-16	1.49095e-15
novel_mir5072	0	56	0.001	1.98	10.9513	Up	6.47364e-16	1.49019e-15
novel_mir331	0	56	0.001	1.98	10.9513	Up	6.47364e-16	1.48943e-15
novel_mir4472	0	56	0.001	1.98	10.9513	Up	6.47364e-16	1.48867e-15
novel_mir1143	0	56	0.001	1.98	10.9513	Up	6.47364e-16	1.48792e-15
novel_mir1262	0	56	0.001	1.98	10.9513	Up	6.47364e-16	1.48716e-15
novel_mir3008	0	56	0.001	1.98	10.9513	Up	6.47364e-16	1.48641e-15
novel_mir1816	0	56	0.001	1.98	10.9513	Up	6.47364e-16	1.48565e-15
novel_mir5553	0	56	0.001	1.98	10.9513	Up	6.47364e-16	1.4849e-15
novel_mir1401	0	56	0.001	1.98	10.9513	Up	6.47364e-16	1.48414e-15
novel_mir3333	0	56	0.001	1.98	10.9513	Up	6.47364e-16	1.48339e-15
novel_mir1594	0	56	0.001	1.98	10.9513	Up	6.47364e-16	1.48264e-15
novel_mir527	0	56	0.001	1.98	10.9513	Up	6.47364e-16	1.48189e-15
novel_mir2229	0	56	0.001	1.98	10.9513	Up	6.47364e-16	1.48114e-15
novel_mir4031	0	56	0.001	1.98	10.9513	Up	6.47364e-16	1.48039e-15
novel_mir728	0	56	0.001	1.98	10.9513	Up	6.47364e-16	1.47964e-15
novel_mir746	0	56	0.001	1.98	10.9513	Up	6.47364e-16	1.47889e-15
novel_mir5273	0	56	0.001	1.98	10.9513	Up	6.47364e-16	1.47815e-15
novel_mir4616	0	56	0.001	1.98	10.9513	Up	6.47364e-16	1.4774e-15
novel_mir6143	0	56	0.001	1.98	10.9513	Up	6.47364e-16	1.47666e-15
novel_mir3990	0	55	0.001	1.95	10.9293	Up	1.21032e-15	2.74279e-15
novel_mir3407	0	55	0.001	1.95	10.9293	Up	1.21032e-15	2.74142e-15
novel_mir5708	0	55	0.001	1.95	10.9293	Up	1.21032e-15	2.74004e-15
novel_mir4901	0	55	0.001	1.95	10.9293	Up	1.21032e-15	2.73867e-15
novel_mir3190	0	55	0.001	1.95	10.9293	Up	1.21032e-15	2.7373e-15
novel_mir805	0	55	0.001	1.95	10.9293	Up	1.21032e-15	2.73593e-15
novel_mir1772	0	55	0.001	1.95	10.9293	Up	1.21032e-15	2.73457e-15
novel_mir3029	0	55	0.001	1.95	10.9293	Up	1.21032e-15	2.7332e-15
novel_mir4662	0	55	0.001	1.95	10.9293	Up	1.21032e-15	2.73184e-15
novel_mir5930	0	55	0.001	1.95	10.9293	Up	1.21032e-15	2.73047e-15
novel_mir5148	0	55	0.001	1.95	10.9293	Up	1.21032e-15	2.72911e-15
novel_mir1417	0	55	0.001	1.95	10.9293	Up	1.21032e-15	2.72775e-15
novel_mir2151	0	55	0.001	1.95	10.9293	Up	1.21032e-15	2.72639e-15
novel_mir656	0	55	0.001	1.95	10.9293	Up	1.21032e-15	2.72503e-15
novel_mir5154	0	55	0.001	1.95	10.9293	Up	1.21032e-15	2.72368e-15
mmu-miR-362-3p	0	55	0.001	1.95	10.9293	Up	1.21032e-15	2.72232e-15
novel_mir3577	0	55	0.001	1.95	10.9293	Up	1.21032e-15	2.72097e-15
mmu-miR-93-3p	0	55	0.001	1.95	10.9293	Up	1.21032e-15	2.71962e-15
novel_mir971	0	55	0.001	1.95	10.9293	Up	1.21032e-15	2.71826e-15
novel_mir4522	0	55	0.001	1.95	10.9293	Up	1.21032e-15	2.71691e-15
novel_mir1338	0	55	0.001	1.95	10.9293	Up	1.21032e-15	2.71557e-15
novel_mir4691	0	54	0.001	1.91	10.8994	Up	2.26284e-15	5.0595e-15
novel_mir881	0	54	0.001	1.91	10.8994	Up	2.26284e-15	5.05699e-15
novel_mir3904	0	54	0.001	1.91	10.8994	Up	2.26284e-15	5.0545e-15
novel_mir4887	0	54	0.001	1.91	10.8994	Up	2.26284e-15	5.052e-15
novel_mir2836	0	54	0.001	1.91	10.8994	Up	2.26284e-15	5.04951e-15
novel_mir6048	0	54	0.001	1.91	10.8994	Up	2.26284e-15	5.04702e-15
novel_mir4082	0	54	0.001	1.91	10.8994	Up	2.26284e-15	5.04453e-15
novel_mir3644	0	54	0.001	1.91	10.8994	Up	2.26284e-15	5.04204e-15
novel_mir3082	0	54	0.001	1.91	10.8994	Up	2.26284e-15	5.03956e-15
novel_mir4788	0	54	0.001	1.91	10.8994	Up	2.26284e-15	5.03708e-15
novel_mir5482	0	54	0.001	1.91	10.8994	Up	2.26284e-15	5.0346e-15
novel_mir785	0	54	0.001	1.91	10.8994	Up	2.26284e-15	5.03212e-15
novel_mir2949	0	54	0.001	1.91	10.8994	Up	2.26284e-15	5.02965e-15
novel_mir5300	0	54	0.001	1.91	10.8994	Up	2.26284e-15	5.02717e-15
novel_mir4045	0	54	0.001	1.91	10.8994	Up	2.26284e-15	5.02471e-15
novel_mir4497	0	54	0.001	1.91	10.8994	Up	2.26284e-15	5.02224e-15
novel_mir3296	0	54	0.001	1.91	10.8994	Up	2.26284e-15	5.01977e-15
novel_mir5485	0	54	0.001	1.91	10.8994	Up	2.26284e-15	5.01731e-15
novel_mir2766	0	54	0.001	1.91	10.8994	Up	2.26284e-15	5.01485e-15
mmu-miR-344-3p	0	54	0.001	1.91	10.8994	Up	2.26284e-15	5.0124e-15
novel_mir1607	0	54	0.001	1.91	10.8994	Up	2.26284e-15	5.00994e-15
novel_mir1283	0	54	0.001	1.91	10.8994	Up	2.26284e-15	5.00749e-15
novel_mir2473	0	54	0.001	1.91	10.8994	Up	2.26284e-15	5.00504e-15
novel_mir3820	0	54	0.001	1.91	10.8994	Up	2.26284e-15	5.00259e-15
novel_mir3272	0	54	0.001	1.91	10.8994	Up	2.26284e-15	5.00015e-15
novel_mir5242	0	54	0.001	1.91	10.8994	Up	2.26284e-15	4.9977e-15
novel_mir5522	0	54	0.001	1.91	10.8994	Up	2.26284e-15	4.99526e-15
novel_mir943	0	54	0.001	1.91	10.8994	Up	2.26284e-15	4.99283e-15
novel_mir1716	0	53	0.001	1.88	10.8765	Up	4.23064e-15	9.30288e-15
novel_mir1876	0	53	0.001	1.88	10.8765	Up	4.23064e-15	9.29836e-15
novel_mir3275	0	53	0.001	1.88	10.8765	Up	4.23064e-15	9.29384e-15
novel_mir4667	0	53	0.001	1.88	10.8765	Up	4.23064e-15	9.28933e-15
novel_mir955	0	53	0.001	1.88	10.8765	Up	4.23064e-15	9.28482e-15
novel_mir5960	0	53	0.001	1.88	10.8765	Up	4.23064e-15	9.28031e-15
novel_mir3467	0	53	0.001	1.88	10.8765	Up	4.23064e-15	9.27581e-15
novel_mir718	0	53	0.001	1.88	10.8765	Up	4.23064e-15	9.27132e-15
novel_mir3742	0	53	0.001	1.88	10.8765	Up	4.23064e-15	9.26682e-15
novel_mir2203	0	53	0.001	1.88	10.8765	Up	4.23064e-15	9.26234e-15
novel_mir5533	0	53	0.001	1.88	10.8765	Up	4.23064e-15	9.25785e-15
novel_mir4845	0	53	0.001	1.88	10.8765	Up	4.23064e-15	9.25337e-15
novel_mir3230	0	53	0.001	1.88	10.8765	Up	4.23064e-15	9.2489e-15
novel_mir5988	0	53	0.001	1.88	10.8765	Up	4.23064e-15	9.24443e-15
novel_mir471	0	53	0.001	1.88	10.8765	Up	4.23064e-15	9.23996e-15
novel_mir2397	0	53	0.001	1.88	10.8765	Up	4.23064e-15	9.2355e-15
novel_mir2878	0	53	0.001	1.88	10.8765	Up	4.23064e-15	9.23104e-15
novel_mir692	0	53	0.001	1.88	10.8765	Up	4.23064e-15	9.22659e-15
novel_mir2802	0	53	0.001	1.88	10.8765	Up	4.23064e-15	9.22214e-15
novel_mir6108	0	53	0.001	1.88	10.8765	Up	4.23064e-15	9.2177e-15
novel_mir1809	0	52	0.001	1.84	10.8455	Up	7.90966e-15	1.71098e-14
novel_mir5399	0	52	0.001	1.84	10.8455	Up	7.90966e-15	1.71017e-14
novel_mir4248	0	52	0.001	1.84	10.8455	Up	7.90966e-15	1.70935e-14
novel_mir2624	0	52	0.001	1.84	10.8455	Up	7.90966e-15	1.70853e-14
novel_mir1601	0	52	0.001	1.84	10.8455	Up	7.90966e-15	1.70772e-14
novel_mir2076	0	52	0.001	1.84	10.8455	Up	7.90966e-15	1.7069e-14
novel_mir2850	0	52	0.001	1.84	10.8455	Up	7.90966e-15	1.70609e-14
novel_mir5623	0	52	0.001	1.84	10.8455	Up	7.90966e-15	1.70527e-14
novel_mir4712	0	52	0.001	1.84	10.8455	Up	7.90966e-15	1.70446e-14
novel_mir2178	0	52	0.001	1.84	10.8455	Up	7.90966e-15	1.70365e-14
novel_mir3070	0	52	0.001	1.84	10.8455	Up	7.90966e-15	1.70284e-14
novel_mir136	0	52	0.001	1.84	10.8455	Up	7.90966e-15	1.70203e-14
mmu-miR-652-5p	0	52	0.001	1.84	10.8455	Up	7.90966e-15	1.70122e-14
novel_mir5426	0	52	0.001	1.84	10.8455	Up	7.90966e-15	1.70041e-14
novel_mir2090	0	52	0.001	1.84	10.8455	Up	7.90966e-15	1.6996e-14
novel_mir4456	0	52	0.001	1.84	10.8455	Up	7.90966e-15	1.69879e-14
novel_mir2965	0	52	0.001	1.84	10.8455	Up	7.90966e-15	1.69799e-14
novel_mir2667	0	52	0.001	1.84	10.8455	Up	7.90966e-15	1.69718e-14
novel_mir5089	0	52	0.001	1.84	10.8455	Up	7.90966e-15	1.69637e-14
novel_mir1558	0	52	0.001	1.84	10.8455	Up	7.90966e-15	1.69557e-14
novel_mir826	0	52	0.001	1.84	10.8455	Up	7.90966e-15	1.69477e-14
novel_mir100	0	52	0.001	1.84	10.8455	Up	7.90966e-15	1.69396e-14
novel_mir4674	0	52	0.001	1.84	10.8455	Up	7.90966e-15	1.69316e-14
novel_mir2269	0	52	0.001	1.84	10.8455	Up	7.90966e-15	1.69236e-14
novel_mir1543	0	52	0.001	1.84	10.8455	Up	7.90966e-15	1.69156e-14
novel_mir2918	0	52	0.001	1.84	10.8455	Up	7.90966e-15	1.69076e-14
novel_mir4318	0	52	0.001	1.84	10.8455	Up	7.90966e-15	1.68996e-14
novel_mir5615	0	52	0.001	1.84	10.8455	Up	7.90966e-15	1.68916e-14
novel_mir4485	0	52	0.001	1.84	10.8455	Up	7.90966e-15	1.68837e-14
novel_mir3284	0	52	0.001	1.84	10.8455	Up	7.90966e-15	1.68757e-14
novel_mir464	0	52	0.001	1.84	10.8455	Up	7.90966e-15	1.68677e-14
novel_mir3305	0	51	0.001	1.81	10.8218	Up	1.4788e-14	3.12706e-14
novel_mir2094	0	51	0.001	1.81	10.8218	Up	1.4788e-14	3.1256e-14
novel_mir2493	0	51	0.001	1.81	10.8218	Up	1.4788e-14	3.12414e-14
novel_mir5582	0	51	0.001	1.81	10.8218	Up	1.4788e-14	3.12268e-14
novel_mir4866	0	51	0.001	1.81	10.8218	Up	1.4788e-14	3.12122e-14
novel_mir2246	0	51	0.001	1.81	10.8218	Up	1.4788e-14	3.11977e-14
novel_mir2475	0	51	0.001	1.81	10.8218	Up	1.4788e-14	3.11831e-14
novel_mir522	0	51	0.001	1.81	10.8218	Up	1.4788e-14	3.11686e-14
novel_mir4437	0	51	0.001	1.81	10.8218	Up	1.4788e-14	3.11541e-14
novel_mir3586	0	51	0.001	1.81	10.8218	Up	1.4788e-14	3.11396e-14
novel_mir3446	0	51	0.001	1.81	10.8218	Up	1.4788e-14	3.11251e-14
novel_mir2119	0	51	0.001	1.81	10.8218	Up	1.4788e-14	3.11106e-14
novel_mir964	0	51	0.001	1.81	10.8218	Up	1.4788e-14	3.10961e-14
novel_mir6027	0	51	0.001	1.81	10.8218	Up	1.4788e-14	3.10817e-14
novel_mir2859	0	51	0.001	1.81	10.8218	Up	1.4788e-14	3.10672e-14
novel_mir1805	0	51	0.001	1.81	10.8218	Up	1.4788e-14	3.10528e-14
novel_mir2286	0	51	0.001	1.81	10.8218	Up	1.4788e-14	3.10384e-14
novel_mir1592	0	51	0.001	1.81	10.8218	Up	1.4788e-14	3.1024e-14
novel_mir1915	0	51	0.001	1.81	10.8218	Up	1.4788e-14	3.10096e-14
novel_mir2195	0	51	0.001	1.81	10.8218	Up	1.4788e-14	3.09952e-14
novel_mir5287	0	51	0.001	1.81	10.8218	Up	1.4788e-14	3.09808e-14
novel_mir3889	0	51	0.001	1.81	10.8218	Up	1.4788e-14	3.09665e-14
novel_mir6141	0	51	0.001	1.81	10.8218	Up	1.4788e-14	3.09521e-14
novel_mir4376	0	51	0.001	1.81	10.8218	Up	1.4788e-14	3.09378e-14
novel_mir2541	0	51	0.001	1.81	10.8218	Up	1.4788e-14	3.09235e-14
novel_mir4806	0	51	0.001	1.81	10.8218	Up	1.4788e-14	3.09092e-14
novel_mir3638	0	51	0.001	1.81	10.8218	Up	1.4788e-14	3.08949e-14
novel_mir2685	0	51	0.001	1.81	10.8218	Up	1.4788e-14	3.08807e-14
novel_mir1099	0	51	0.001	1.81	10.8218	Up	1.4788e-14	3.08664e-14
novel_mir1496	0	51	0.001	1.81	10.8218	Up	1.4788e-14	3.08522e-14
novel_mir1102	0	51	0.001	1.81	10.8218	Up	1.4788e-14	3.08379e-14
novel_mir2221	0	51	0.001	1.81	10.8218	Up	1.4788e-14	3.08237e-14
novel_mir2137	0	51	0.001	1.81	10.8218	Up	1.4788e-14	3.08095e-14
novel_mir2382	0	51	0.001	1.81	10.8218	Up	1.4788e-14	3.07953e-14
novel_mir3678	0	51	0.001	1.81	10.8218	Up	1.4788e-14	3.07811e-14
novel_mir3923	0	51	0.001	1.81	10.8218	Up	1.4788e-14	3.0767e-14
novel_mir1430	0	50	0.001	1.77	10.7895	Up	2.7648e-14	5.72329e-14
novel_mir5861	0	50	0.001	1.77	10.7895	Up	2.7648e-14	5.72067e-14
novel_mir247	0	50	0.001	1.77	10.7895	Up	2.7648e-14	5.71805e-14
novel_mir4478	0	50	0.001	1.77	10.7895	Up	2.7648e-14	5.71544e-14
novel_mir2782	0	50	0.001	1.77	10.7895	Up	2.7648e-14	5.71282e-14
novel_mir4665	0	50	0.001	1.77	10.7895	Up	2.7648e-14	5.71022e-14
novel_mir1189	0	50	0.001	1.77	10.7895	Up	2.7648e-14	5.70761e-14
novel_mir2830	0	50	0.001	1.77	10.7895	Up	2.7648e-14	5.705e-14
novel_mir4639	0	50	0.001	1.77	10.7895	Up	2.7648e-14	5.7024e-14
novel_mir3634	0	50	0.001	1.77	10.7895	Up	2.7648e-14	5.6998e-14
novel_mir1681	0	50	0.001	1.77	10.7895	Up	2.7648e-14	5.6972e-14
novel_mir3896	0	50	0.001	1.77	10.7895	Up	2.7648e-14	5.69461e-14
novel_mir2899	0	50	0.001	1.77	10.7895	Up	2.7648e-14	5.69201e-14
novel_mir5364	0	50	0.001	1.77	10.7895	Up	2.7648e-14	5.68942e-14
novel_mir3418	0	50	0.001	1.77	10.7895	Up	2.7648e-14	5.68683e-14
novel_mir3335	0	50	0.001	1.77	10.7895	Up	2.7648e-14	5.68425e-14
novel_mir2561	0	50	0.001	1.77	10.7895	Up	2.7648e-14	5.68166e-14
novel_mir1118	0	50	0.001	1.77	10.7895	Up	2.7648e-14	5.67908e-14
novel_mir4291	0	50	0.001	1.77	10.7895	Up	2.7648e-14	5.6765e-14
novel_mir3194	0	50	0.001	1.77	10.7895	Up	2.7648e-14	5.67393e-14
novel_mir4630	0	50	0.001	1.77	10.7895	Up	2.7648e-14	5.67135e-14
novel_mir4091	0	50	0.001	1.77	10.7895	Up	2.7648e-14	5.66878e-14
novel_mir3801	0	50	0.001	1.77	10.7895	Up	2.7648e-14	5.66621e-14
novel_mir2181	0	50	0.001	1.77	10.7895	Up	2.7648e-14	5.66364e-14
novel_mir6053	0	50	0.001	1.77	10.7895	Up	2.7648e-14	5.66108e-14
novel_mir2106	0	50	0.001	1.77	10.7895	Up	2.7648e-14	5.65852e-14
novel_mir616	0	50	0.001	1.77	10.7895	Up	2.7648e-14	5.65596e-14
novel_mir3359	0	50	0.001	1.77	10.7895	Up	2.7648e-14	5.6534e-14
novel_mir5397	0	49	0.001	1.74	10.7649	Up	5.1691e-14	1.04702e-13
novel_mir4959	0	49	0.001	1.74	10.7649	Up	5.1691e-14	1.04655e-13
novel_mir4961	0	49	0.001	1.74	10.7649	Up	5.1691e-14	1.04608e-13
novel_mir1096	0	49	0.001	1.74	10.7649	Up	5.1691e-14	1.04562e-13
novel_mir1437	0	49	0.001	1.74	10.7649	Up	5.1691e-14	1.04515e-13
novel_mir5452	0	49	0.001	1.74	10.7649	Up	5.1691e-14	1.04468e-13
novel_mir5444	0	49	0.001	1.74	10.7649	Up	5.1691e-14	1.04421e-13
novel_mir5292	0	49	0.001	1.74	10.7649	Up	5.1691e-14	1.04375e-13
novel_mir2146	0	49	0.001	1.74	10.7649	Up	5.1691e-14	1.04328e-13
novel_mir3619	0	49	0.001	1.74	10.7649	Up	5.1691e-14	1.04282e-13
novel_mir5317	0	49	0.001	1.74	10.7649	Up	5.1691e-14	1.04235e-13
novel_mir1222	0	49	0.001	1.74	10.7649	Up	5.1691e-14	1.04189e-13
novel_mir1501	0	49	0.001	1.74	10.7649	Up	5.1691e-14	1.04142e-13
novel_mir5725	0	49	0.001	1.74	10.7649	Up	5.1691e-14	1.04096e-13
novel_mir5785	0	49	0.001	1.74	10.7649	Up	5.1691e-14	1.04049e-13
novel_mir1492	0	49	0.001	1.74	10.7649	Up	5.1691e-14	1.04003e-13
novel_mir4580	0	49	0.001	1.74	10.7649	Up	5.1691e-14	1.03957e-13
novel_mir3912	0	49	0.001	1.74	10.7649	Up	5.1691e-14	1.03911e-13
novel_mir5637	0	49	0.001	1.74	10.7649	Up	5.1691e-14	1.03864e-13
novel_mir4543	0	49	0.001	1.74	10.7649	Up	5.1691e-14	1.03818e-13
novel_mir5402	0	49	0.001	1.74	10.7649	Up	5.1691e-14	1.03772e-13
novel_mir3974	0	49	0.001	1.74	10.7649	Up	5.1691e-14	1.03726e-13
novel_mir865	0	49	0.001	1.74	10.7649	Up	5.1691e-14	1.0368e-13
novel_mir741	0	49	0.001	1.74	10.7649	Up	5.1691e-14	1.03634e-13
novel_mir710	0	49	0.001	1.74	10.7649	Up	5.1691e-14	1.03588e-13
novel_mir1866	0	49	0.001	1.74	10.7649	Up	5.1691e-14	1.03542e-13
novel_mir1460	0	49	0.001	1.74	10.7649	Up	5.1691e-14	1.03496e-13
novel_mir5963	0	49	0.001	1.74	10.7649	Up	5.1691e-14	1.03451e-13
novel_mir1998	0	49	0.001	1.74	10.7649	Up	5.1691e-14	1.03405e-13
novel_mir5314	0	49	0.001	1.74	10.7649	Up	5.1691e-14	1.03359e-13
novel_mir2835	0	49	0.001	1.74	10.7649	Up	5.1691e-14	1.03313e-13
novel_mir4895	0	49	0.001	1.74	10.7649	Up	5.1691e-14	1.03268e-13
novel_mir1491	0	48	0.001	1.7	10.7313	Up	9.66422e-14	1.92391e-13
novel_mir3811	0	48	0.001	1.7	10.7313	Up	9.66422e-14	1.92306e-13
novel_mir4777	0	48	0.001	1.7	10.7313	Up	9.66422e-14	1.92221e-13
novel_mir5382	0	48	0.001	1.7	10.7313	Up	9.66422e-14	1.92137e-13
novel_mir5594	0	48	0.001	1.7	10.7313	Up	9.66422e-14	1.92052e-13
novel_mir3280	0	48	0.001	1.7	10.7313	Up	9.66422e-14	1.91968e-13
novel_mir2199	0	48	0.001	1.7	10.7313	Up	9.66422e-14	1.91884e-13
novel_mir2343	0	48	0.001	1.7	10.7313	Up	9.66422e-14	1.918e-13
novel_mir2010	0	48	0.001	1.7	10.7313	Up	9.66422e-14	1.91715e-13
novel_mir3559	0	48	0.001	1.7	10.7313	Up	9.66422e-14	1.91631e-13
novel_mir3126	0	48	0.001	1.7	10.7313	Up	9.66422e-14	1.91547e-13
novel_mir4922	0	48	0.001	1.7	10.7313	Up	9.66422e-14	1.91463e-13
novel_mir4589	0	48	0.001	1.7	10.7313	Up	9.66422e-14	1.91379e-13
novel_mir2238	0	48	0.001	1.7	10.7313	Up	9.66422e-14	1.91296e-13
novel_mir3191	0	48	0.001	1.7	10.7313	Up	9.66422e-14	1.91212e-13
novel_mir2840	0	48	0.001	1.7	10.7313	Up	9.66422e-14	1.91128e-13
novel_mir5286	0	48	0.001	1.7	10.7313	Up	9.66422e-14	1.91045e-13
novel_mir5196	0	48	0.001	1.7	10.7313	Up	9.66422e-14	1.90961e-13
novel_mir3153	0	48	0.001	1.7	10.7313	Up	9.66422e-14	1.90878e-13
novel_mir3200	0	48	0.001	1.7	10.7313	Up	9.66422e-14	1.90794e-13
novel_mir4212	0	48	0.001	1.7	10.7313	Up	9.66422e-14	1.90711e-13
novel_mir4070	0	48	0.001	1.7	10.7313	Up	9.66422e-14	1.90628e-13
novel_mir3034	0	48	0.001	1.7	10.7313	Up	9.66422e-14	1.90545e-13
novel_mir3138	0	48	0.001	1.7	10.7313	Up	9.66422e-14	1.90462e-13
novel_mir2732	0	48	0.001	1.7	10.7313	Up	9.66422e-14	1.90379e-13
novel_mir3240	0	48	0.001	1.7	10.7313	Up	9.66422e-14	1.90296e-13
novel_mir5843	0	48	0.001	1.7	10.7313	Up	9.66422e-14	1.90213e-13
novel_mir1372	0	48	0.001	1.7	10.7313	Up	9.66422e-14	1.9013e-13
novel_mir1092	0	48	0.001	1.7	10.7313	Up	9.66422e-14	1.90048e-13
novel_mir3501	0	48	0.001	1.7	10.7313	Up	9.66422e-14	1.89965e-13
novel_mir823	0	48	0.001	1.7	10.7313	Up	9.66422e-14	1.89882e-13
novel_mir5819	0	48	0.001	1.7	10.7313	Up	9.66422e-14	1.898e-13
novel_mir5506	0	48	0.001	1.7	10.7313	Up	9.66422e-14	1.89717e-13
novel_mir4089	0	48	0.001	1.7	10.7313	Up	9.66422e-14	1.89635e-13
novel_mir5110	0	48	0.001	1.7	10.7313	Up	9.66422e-14	1.89553e-13
novel_mir3623	0	48	0.001	1.7	10.7313	Up	9.66422e-14	1.89471e-13
novel_mir792	0	48	0.001	1.7	10.7313	Up	9.66422e-14	1.89389e-13
novel_mir1210	0	48	0.001	1.7	10.7313	Up	9.66422e-14	1.89306e-13
mmu-miR-1247-5p	0	48	0.001	1.7	10.7313	Up	9.66422e-14	1.89225e-13
novel_mir1672	0	47	0.001	1.67	10.7056	Up	1.80684e-13	3.51192e-13
novel_mir2585	0	47	0.001	1.67	10.7056	Up	1.80684e-13	3.51041e-13
novel_mir2508	0	47	0.001	1.67	10.7056	Up	1.80684e-13	3.5089e-13
novel_mir4953	0	47	0.001	1.67	10.7056	Up	1.80684e-13	3.50739e-13
novel_mir4225	0	47	0.001	1.67	10.7056	Up	1.80684e-13	3.50589e-13
novel_mir1273	0	47	0.001	1.67	10.7056	Up	1.80684e-13	3.50438e-13
novel_mir57	0	47	0.001	1.67	10.7056	Up	1.80684e-13	3.50288e-13
novel_mir5412	0	47	0.001	1.67	10.7056	Up	1.80684e-13	3.50138e-13
novel_mir1904	0	47	0.001	1.67	10.7056	Up	1.80684e-13	3.49988e-13
novel_mir1825	0	47	0.001	1.67	10.7056	Up	1.80684e-13	3.49838e-13
novel_mir4018	0	47	0.001	1.67	10.7056	Up	1.80684e-13	3.49688e-13
novel_mir1157	0	47	0.001	1.67	10.7056	Up	1.80684e-13	3.49538e-13
novel_mir5665	0	47	0.001	1.67	10.7056	Up	1.80684e-13	3.49389e-13
novel_mir897	0	47	0.001	1.67	10.7056	Up	1.80684e-13	3.4924e-13
novel_mir1072	0	47	0.001	1.67	10.7056	Up	1.80684e-13	3.4909e-13
novel_mir5839	0	47	0.001	1.67	10.7056	Up	1.80684e-13	3.48941e-13
novel_mir2177	0	47	0.001	1.67	10.7056	Up	1.80684e-13	3.48792e-13
novel_mir1038	0	47	0.001	1.67	10.7056	Up	1.80684e-13	3.48643e-13
novel_mir5153	0	47	0.001	1.67	10.7056	Up	1.80684e-13	3.48495e-13
novel_mir6103	0	47	0.001	1.67	10.7056	Up	1.80684e-13	3.48346e-13
novel_mir2463	0	47	0.001	1.67	10.7056	Up	1.80684e-13	3.48198e-13
novel_mir2936	0	47	0.001	1.67	10.7056	Up	1.80684e-13	3.48049e-13
novel_mir1276	0	47	0.001	1.67	10.7056	Up	1.80684e-13	3.47901e-13
novel_mir4289	0	47	0.001	1.67	10.7056	Up	1.80684e-13	3.47753e-13
novel_mir2702	0	47	0.001	1.67	10.7056	Up	1.80684e-13	3.47605e-13
novel_mir5719	0	47	0.001	1.67	10.7056	Up	1.80684e-13	3.47457e-13
novel_mir722	0	47	0.001	1.67	10.7056	Up	1.80684e-13	3.47309e-13
novel_mir3603	0	46	0.001	1.63	10.6707	Up	3.3781e-13	6.42777e-13
novel_mir2573	0	46	0.001	1.63	10.6707	Up	3.3781e-13	6.42507e-13
novel_mir4812	0	46	0.001	1.63	10.6707	Up	3.3781e-13	6.42237e-13
novel_mir852	0	46	0.001	1.63	10.6707	Up	3.3781e-13	6.41967e-13
novel_mir893	0	46	0.001	1.63	10.6707	Up	3.3781e-13	6.41697e-13
novel_mir2502	0	46	0.001	1.63	10.6707	Up	3.3781e-13	6.41428e-13
novel_mir1786	0	46	0.001	1.63	10.6707	Up	3.3781e-13	6.41158e-13
novel_mir3961	0	46	0.001	1.63	10.6707	Up	3.3781e-13	6.40889e-13
novel_mir259	0	46	0.001	1.63	10.6707	Up	3.3781e-13	6.4062e-13
novel_mir5938	0	46	0.001	1.63	10.6707	Up	3.3781e-13	6.40352e-13
novel_mir3326	0	46	0.001	1.63	10.6707	Up	3.3781e-13	6.40083e-13
novel_mir2071	0	46	0.001	1.63	10.6707	Up	3.3781e-13	6.39815e-13
novel_mir2648	0	46	0.001	1.63	10.6707	Up	3.3781e-13	6.39547e-13
novel_mir3841	0	46	0.001	1.63	10.6707	Up	3.3781e-13	6.3928e-13
novel_mir3928	0	46	0.001	1.63	10.6707	Up	3.3781e-13	6.39012e-13
novel_mir465	0	46	0.001	1.63	10.6707	Up	3.3781e-13	6.38745e-13
novel_mir5618	0	46	0.001	1.63	10.6707	Up	3.3781e-13	6.38478e-13
novel_mir2180	0	46	0.001	1.63	10.6707	Up	3.3781e-13	6.38211e-13
novel_mir1707	0	46	0.001	1.63	10.6707	Up	3.3781e-13	6.37944e-13
novel_mir1363	0	46	0.001	1.63	10.6707	Up	3.3781e-13	6.37678e-13
novel_mir1927	0	46	0.001	1.63	10.6707	Up	3.3781e-13	6.37412e-13
novel_mir1098	0	46	0.001	1.63	10.6707	Up	3.3781e-13	6.37146e-13
novel_mir5326	0	46	0.001	1.63	10.6707	Up	3.3781e-13	6.3688e-13
novel_mir931	0	45	0.001	1.59	10.6348	Up	6.31574e-13	1.17795e-12
novel_mir2453	0	45	0.001	1.59	10.6348	Up	6.31574e-13	1.17746e-12
novel_mir5723	0	45	0.001	1.59	10.6348	Up	6.31574e-13	1.17698e-12
novel_mir4914	0	45	0.001	1.59	10.6348	Up	6.31574e-13	1.17649e-12
novel_mir3448	0	45	0.001	1.59	10.6348	Up	6.31574e-13	1.17601e-12
novel_mir1421	0	45	0.001	1.59	10.6348	Up	6.31574e-13	1.17552e-12
novel_mir2579	0	45	0.001	1.59	10.6348	Up	6.31574e-13	1.17504e-12
novel_mir5889	0	45	0.001	1.59	10.6348	Up	6.31574e-13	1.17456e-12
novel_mir2130	0	45	0.001	1.59	10.6348	Up	6.31574e-13	1.17407e-12
novel_mir2402	0	45	0.001	1.59	10.6348	Up	6.31574e-13	1.17359e-12
novel_mir2549	0	45	0.001	1.59	10.6348	Up	6.31574e-13	1.17311e-12
novel_mir1428	0	45	0.001	1.59	10.6348	Up	6.31574e-13	1.17263e-12
novel_mir5315	0	45	0.001	1.59	10.6348	Up	6.31574e-13	1.17215e-12
novel_mir2480	0	45	0.001	1.59	10.6348	Up	6.31574e-13	1.17166e-12
novel_mir5164	0	45	0.001	1.59	10.6348	Up	6.31574e-13	1.17118e-12
novel_mir2724	0	45	0.001	1.59	10.6348	Up	6.31574e-13	1.1707e-12
novel_mir2699	0	45	0.001	1.59	10.6348	Up	6.31574e-13	1.17022e-12
novel_mir1765	0	45	0.001	1.59	10.6348	Up	6.31574e-13	1.16974e-12
novel_mir2843	0	45	0.001	1.59	10.6348	Up	6.31574e-13	1.16927e-12
novel_mir1161	0	45	0.001	1.59	10.6348	Up	6.31574e-13	1.16879e-12
novel_mir3313	0	45	0.001	1.59	10.6348	Up	6.31574e-13	1.16831e-12
novel_mir529	0	45	0.001	1.59	10.6348	Up	6.31574e-13	1.16783e-12
novel_mir5812	0	45	0.001	1.59	10.6348	Up	6.31574e-13	1.16735e-12
novel_mir4918	0	45	0.001	1.59	10.6348	Up	6.31574e-13	1.16688e-12
novel_mir3328	0	45	0.001	1.59	10.6348	Up	6.31574e-13	1.1664e-12
novel_mir3196	0	45	0.001	1.59	10.6348	Up	6.31574e-13	1.16592e-12
novel_mir1436	0	44	0.001	1.56	10.6073	Up	1.1808e-12	2.15955e-12
novel_mir5651	0	44	0.001	1.56	10.6073	Up	1.1808e-12	2.15867e-12
novel_mir3618	0	44	0.001	1.56	10.6073	Up	1.1808e-12	2.1578e-12
novel_mir5638	0	44	0.001	1.56	10.6073	Up	1.1808e-12	2.15693e-12
novel_mir3370	0	44	0.001	1.56	10.6073	Up	1.1808e-12	2.15606e-12
novel_mir3097	0	44	0.001	1.56	10.6073	Up	1.1808e-12	2.15519e-12
novel_mir6157	0	44	0.001	1.56	10.6073	Up	1.1808e-12	2.15432e-12
novel_mir5844	0	44	0.001	1.56	10.6073	Up	1.1808e-12	2.15345e-12
novel_mir1767	0	44	0.001	1.56	10.6073	Up	1.1808e-12	2.15258e-12
novel_mir308	0	44	0.001	1.56	10.6073	Up	1.1808e-12	2.15171e-12
novel_mir706	0	44	0.001	1.56	10.6073	Up	1.1808e-12	2.15084e-12
novel_mir4748	0	44	0.001	1.56	10.6073	Up	1.1808e-12	2.14998e-12
novel_mir2127	0	44	0.001	1.56	10.6073	Up	1.1808e-12	2.14911e-12
novel_mir56	0	44	0.001	1.56	10.6073	Up	1.1808e-12	2.14825e-12
novel_mir4498	0	44	0.001	1.56	10.6073	Up	1.1808e-12	2.14738e-12
novel_mir5564	0	44	0.001	1.56	10.6073	Up	1.1808e-12	2.14652e-12
novel_mir2665	0	44	0.001	1.56	10.6073	Up	1.1808e-12	2.14566e-12
novel_mir3001	0	44	0.001	1.56	10.6073	Up	1.1808e-12	2.1448e-12
novel_mir5130	0	44	0.001	1.56	10.6073	Up	1.1808e-12	2.14393e-12
novel_mir5885	0	44	0.001	1.56	10.6073	Up	1.1808e-12	2.14307e-12
novel_mir6000	0	44	0.001	1.56	10.6073	Up	1.1808e-12	2.14221e-12
novel_mir857	0	44	0.001	1.56	10.6073	Up	1.1808e-12	2.14135e-12
novel_mir5395	0	44	0.001	1.56	10.6073	Up	1.1808e-12	2.1405e-12
novel_mir1561	0	44	0.001	1.56	10.6073	Up	1.1808e-12	2.13964e-12
novel_mir5575	0	44	0.001	1.56	10.6073	Up	1.1808e-12	2.13878e-12
novel_mir1264	0	44	0.001	1.56	10.6073	Up	1.1808e-12	2.13792e-12
novel_mir17	0	44	0.001	1.56	10.6073	Up	1.1808e-12	2.13707e-12
novel_mir2326	0	44	0.001	1.56	10.6073	Up	1.1808e-12	2.13621e-12
novel_mir4685	0	44	0.001	1.56	10.6073	Up	1.1808e-12	2.13536e-12
novel_mir4562	0	44	0.001	1.56	10.6073	Up	1.1808e-12	2.1345e-12
novel_mir3344	0	44	0.001	1.56	10.6073	Up	1.1808e-12	2.13365e-12
novel_mir2910	0	43	0.001	1.52	10.5699	Up	2.20764e-12	3.9559e-12
novel_mir625	0	43	0.001	1.52	10.5699	Up	2.20764e-12	3.95433e-12
novel_mir5468	0	43	0.001	1.52	10.5699	Up	2.20764e-12	3.95277e-12
novel_mir5577	0	43	0.001	1.52	10.5699	Up	2.20764e-12	3.9512e-12
novel_mir1404	0	43	0.001	1.52	10.5699	Up	2.20764e-12	3.94964e-12
novel_mir3062	0	43	0.001	1.52	10.5699	Up	2.20764e-12	3.94808e-12
novel_mir1911	0	43	0.001	1.52	10.5699	Up	2.20764e-12	3.94652e-12
novel_mir294	0	43	0.001	1.52	10.5699	Up	2.20764e-12	3.94496e-12
novel_mir874	0	43	0.001	1.52	10.5699	Up	2.20764e-12	3.9434e-12
novel_mir2067	0	43	0.001	1.52	10.5699	Up	2.20764e-12	3.94184e-12
novel_mir4461	0	43	0.001	1.52	10.5699	Up	2.20764e-12	3.94028e-12
novel_mir2954	0	43	0.001	1.52	10.5699	Up	2.20764e-12	3.93873e-12
novel_mir3192	0	43	0.001	1.52	10.5699	Up	2.20764e-12	3.93718e-12
novel_mir4246	0	43	0.001	1.52	10.5699	Up	2.20764e-12	3.93562e-12
novel_mir2190	0	43	0.001	1.52	10.5699	Up	2.20764e-12	3.93407e-12
novel_mir1943	0	43	0.001	1.52	10.5699	Up	2.20764e-12	3.93252e-12
novel_mir749	0	43	0.001	1.52	10.5699	Up	2.20764e-12	3.93097e-12
novel_mir2348	0	43	0.001	1.52	10.5699	Up	2.20764e-12	3.92943e-12
novel_mir5127	0	43	0.001	1.52	10.5699	Up	2.20764e-12	3.92788e-12
novel_mir4620	0	43	0.001	1.52	10.5699	Up	2.20764e-12	3.92633e-12
novel_mir3050	0	43	0.001	1.52	10.5699	Up	2.20764e-12	3.92479e-12
novel_mir875	0	43	0.001	1.52	10.5699	Up	2.20764e-12	3.92325e-12
novel_mir4763	0	43	0.001	1.52	10.5699	Up	2.20764e-12	3.92171e-12
novel_mir3331	0	43	0.001	1.52	10.5699	Up	2.20764e-12	3.92017e-12
novel_mir4174	0	43	0.001	1.52	10.5699	Up	2.20764e-12	3.91863e-12
novel_mir5673	0	43	0.001	1.52	10.5699	Up	2.20764e-12	3.91709e-12
novel_mir3956	0	42	0.001	1.49	10.5411	Up	4.12744e-12	7.30911e-12
novel_mir1568	0	42	0.001	1.49	10.5411	Up	4.12744e-12	7.30625e-12
novel_mir5006	0	42	0.001	1.49	10.5411	Up	4.12744e-12	7.30339e-12
novel_mir886	0	42	0.001	1.49	10.5411	Up	4.12744e-12	7.30053e-12
novel_mir5915	0	42	0.001	1.49	10.5411	Up	4.12744e-12	7.29768e-12
novel_mir2747	0	42	0.001	1.49	10.5411	Up	4.12744e-12	7.29482e-12
novel_mir3423	0	42	0.001	1.49	10.5411	Up	4.12744e-12	7.29197e-12
novel_mir2429	0	42	0.001	1.49	10.5411	Up	4.12744e-12	7.28912e-12
novel_mir1394	0	42	0.001	1.49	10.5411	Up	4.12744e-12	7.28628e-12
novel_mir1739	0	42	0.001	1.49	10.5411	Up	4.12744e-12	7.28343e-12
novel_mir4631	0	42	0.001	1.49	10.5411	Up	4.12744e-12	7.28059e-12
novel_mir1202	0	42	0.001	1.49	10.5411	Up	4.12744e-12	7.27775e-12
novel_mir1999	0	42	0.001	1.49	10.5411	Up	4.12744e-12	7.27491e-12
novel_mir3391	0	42	0.001	1.49	10.5411	Up	4.12744e-12	7.27208e-12
novel_mir693	0	42	0.001	1.49	10.5411	Up	4.12744e-12	7.26925e-12
novel_mir945	0	42	0.001	1.49	10.5411	Up	4.12744e-12	7.26642e-12
novel_mir1834	0	42	0.001	1.49	10.5411	Up	4.12744e-12	7.26359e-12
novel_mir1362	0	42	0.001	1.49	10.5411	Up	4.12744e-12	7.26076e-12
novel_mir1111	0	42	0.001	1.49	10.5411	Up	4.12744e-12	7.25794e-12
novel_mir5002	0	42	0.001	1.49	10.5411	Up	4.12744e-12	7.25512e-12
novel_mir6094	0	42	0.001	1.49	10.5411	Up	4.12744e-12	7.2523e-12
novel_mir5685	0	42	0.001	1.49	10.5411	Up	4.12744e-12	7.24948e-12
novel_mir4077	0	42	0.001	1.49	10.5411	Up	4.12744e-12	7.24666e-12
novel_mir2002	0	42	0.001	1.49	10.5411	Up	4.12744e-12	7.24385e-12
novel_mir815	0	42	0.001	1.49	10.5411	Up	4.12744e-12	7.24104e-12
novel_mir2341	0	42	0.001	1.49	10.5411	Up	4.12744e-12	7.23823e-12
novel_mir3187	0	42	0.001	1.49	10.5411	Up	4.12744e-12	7.23542e-12
novel_mir3870	0	41	0.001	1.45	10.5018	Up	7.71672e-12	1.3413e-11
novel_mir4601	0	41	0.001	1.45	10.5018	Up	7.71672e-12	1.34079e-11
novel_mir5968	0	41	0.001	1.45	10.5018	Up	7.71672e-12	1.34027e-11
novel_mir2393	0	41	0.001	1.45	10.5018	Up	7.71672e-12	1.33976e-11
novel_mir5358	0	41	0.001	1.45	10.5018	Up	7.71672e-12	1.33924e-11
mmu-miR-152-3p	0	41	0.001	1.45	10.5018	Up	7.71672e-12	1.33873e-11
novel_mir5580	0	41	0.001	1.45	10.5018	Up	7.71672e-12	1.33822e-11
novel_mir4403	0	41	0.001	1.45	10.5018	Up	7.71672e-12	1.3377e-11
novel_mir5106	0	41	0.001	1.45	10.5018	Up	7.71672e-12	1.33719e-11
novel_mir3504	0	41	0.001	1.45	10.5018	Up	7.71672e-12	1.33668e-11
novel_mir4473	0	41	0.001	1.45	10.5018	Up	7.71672e-12	1.33617e-11
novel_mir812	0	41	0.001	1.45	10.5018	Up	7.71672e-12	1.33565e-11
novel_mir919	0	41	0.001	1.45	10.5018	Up	7.71672e-12	1.33514e-11
novel_mir3054	0	41	0.001	1.45	10.5018	Up	7.71672e-12	1.33463e-11
novel_mir3546	0	41	0.001	1.45	10.5018	Up	7.71672e-12	1.33412e-11
novel_mir4239	0	41	0.001	1.45	10.5018	Up	7.71672e-12	1.33361e-11
novel_mir2871	0	41	0.001	1.45	10.5018	Up	7.71672e-12	1.3331e-11
novel_mir5953	0	41	0.001	1.45	10.5018	Up	7.71672e-12	1.33259e-11
novel_mir2205	0	41	0.001	1.45	10.5018	Up	7.71672e-12	1.33208e-11
novel_mir5484	0	41	0.001	1.45	10.5018	Up	7.71672e-12	1.33158e-11
novel_mir1361	0	41	0.001	1.45	10.5018	Up	7.71672e-12	1.33107e-11
novel_mir1838	0	41	0.001	1.45	10.5018	Up	7.71672e-12	1.33056e-11
novel_mir6073	0	41	0.001	1.45	10.5018	Up	7.71672e-12	1.33005e-11
novel_mir666	0	41	0.001	1.45	10.5018	Up	7.71672e-12	1.32955e-11
novel_mir6089	0	41	0.001	1.45	10.5018	Up	7.71672e-12	1.32904e-11
novel_mir3744	0	41	0.001	1.45	10.5018	Up	7.71672e-12	1.32853e-11
novel_mir1914	0	41	0.001	1.45	10.5018	Up	7.71672e-12	1.32803e-11
novel_mir2292	0	41	0.001	1.45	10.5018	Up	7.71672e-12	1.32752e-11
novel_mir4329	0	41	0.001	1.45	10.5018	Up	7.71672e-12	1.32702e-11
novel_mir2185	0	41	0.001	1.45	10.5018	Up	7.71672e-12	1.32651e-11
novel_mir3969	0	41	0.001	1.45	10.5018	Up	7.71672e-12	1.32601e-11
novel_mir2415	0	41	0.001	1.45	10.5018	Up	7.71672e-12	1.3255e-11
novel_mir2494	0	41	0.001	1.45	10.5018	Up	7.71672e-12	1.325e-11
novel_mir2736	0	40	0.001	1.42	10.4717	Up	1.44273e-11	2.45302e-11
novel_mir1305	0	40	0.001	1.42	10.4717	Up	1.44273e-11	2.4521e-11
novel_mir3220	0	40	0.001	1.42	10.4717	Up	1.44273e-11	2.45118e-11
novel_mir3171	0	40	0.001	1.42	10.4717	Up	1.44273e-11	2.45026e-11
novel_mir5632	0	40	0.001	1.42	10.4717	Up	1.44273e-11	2.44934e-11
novel_mir2170	0	40	0.001	1.42	10.4717	Up	1.44273e-11	2.44842e-11
novel_mir1567	0	40	0.001	1.42	10.4717	Up	1.44273e-11	2.4475e-11
novel_mir1418	0	40	0.001	1.42	10.4717	Up	1.44273e-11	2.44658e-11
novel_mir1582	0	40	0.001	1.42	10.4717	Up	1.44273e-11	2.44566e-11
novel_mir4750	0	40	0.001	1.42	10.4717	Up	1.44273e-11	2.44475e-11
novel_mir631	0	40	0.001	1.42	10.4717	Up	1.44273e-11	2.44383e-11
novel_mir6067	0	40	0.001	1.42	10.4717	Up	1.44273e-11	2.44291e-11
novel_mir5375	0	40	0.001	1.42	10.4717	Up	1.44273e-11	2.442e-11
novel_mir2979	0	40	0.001	1.42	10.4717	Up	1.44273e-11	2.44109e-11
novel_mir1891	0	40	0.001	1.42	10.4717	Up	1.44273e-11	2.44017e-11
novel_mir1712	0	40	0.001	1.42	10.4717	Up	1.44273e-11	2.43926e-11
novel_mir5835	0	40	0.001	1.42	10.4717	Up	1.44273e-11	2.43835e-11
novel_mir2789	0	40	0.001	1.42	10.4717	Up	1.44273e-11	2.43744e-11
novel_mir1002	0	40	0.001	1.42	10.4717	Up	1.44273e-11	2.43653e-11
novel_mir5478	0	40	0.001	1.42	10.4717	Up	1.44273e-11	2.43562e-11
novel_mir3665	0	40	0.001	1.42	10.4717	Up	1.44273e-11	2.43471e-11
novel_mir2232	0	40	0.001	1.42	10.4717	Up	1.44273e-11	2.4338e-11
novel_mir3043	0	40	0.001	1.42	10.4717	Up	1.44273e-11	2.43289e-11
novel_mir5523	0	40	0.001	1.42	10.4717	Up	1.44273e-11	2.43198e-11
novel_mir3686	0	40	0.001	1.42	10.4717	Up	1.44273e-11	2.43108e-11
novel_mir5776	0	40	0.001	1.42	10.4717	Up	1.44273e-11	2.43017e-11
novel_mir3657	0	40	0.001	1.42	10.4717	Up	1.44273e-11	2.42927e-11
novel_mir305	0	40	0.001	1.42	10.4717	Up	1.44273e-11	2.42836e-11
novel_mir5135	0	40	0.001	1.42	10.4717	Up	1.44273e-11	2.42746e-11
novel_mir2439	0	40	0.001	1.42	10.4717	Up	1.44273e-11	2.42656e-11
novel_mir1257	0	40	0.001	1.42	10.4717	Up	1.44273e-11	2.42565e-11
novel_mir610	0	40	0.001	1.42	10.4717	Up	1.44273e-11	2.42475e-11
novel_mir2328	0	40	0.001	1.42	10.4717	Up	1.44273e-11	2.42385e-11
novel_mir2253	0	40	0.001	1.42	10.4717	Up	1.44273e-11	2.42295e-11
novel_mir664	0	40	0.001	1.42	10.4717	Up	1.44273e-11	2.42205e-11
novel_mir5436	0	40	0.001	1.42	10.4717	Up	1.44273e-11	2.42115e-11
novel_mir3297	0	40	0.001	1.42	10.4717	Up	1.44273e-11	2.42025e-11
novel_mir1117	0	39	0.001	1.38	10.4305	Up	2.69736e-11	4.48337e-11
novel_mir4986	0	39	0.001	1.38	10.4305	Up	2.69736e-11	4.48172e-11
novel_mir3051	0	39	0.001	1.38	10.4305	Up	2.69736e-11	4.48008e-11
novel_mir1063	0	39	0.001	1.38	10.4305	Up	2.69736e-11	4.47843e-11
novel_mir2950	0	39	0.001	1.38	10.4305	Up	2.69736e-11	4.47679e-11
novel_mir1639	0	39	0.001	1.38	10.4305	Up	2.69736e-11	4.47514e-11
novel_mir6056	0	39	0.001	1.38	10.4305	Up	2.69736e-11	4.4735e-11
novel_mir5340	0	39	0.001	1.38	10.4305	Up	2.69736e-11	4.47186e-11
novel_mir4346	0	39	0.001	1.38	10.4305	Up	2.69736e-11	4.47022e-11
novel_mir3911	0	39	0.001	1.38	10.4305	Up	2.69736e-11	4.46858e-11
novel_mir404	0	39	0.001	1.38	10.4305	Up	2.69736e-11	4.46695e-11
novel_mir5029	0	39	0.001	1.38	10.4305	Up	2.69736e-11	4.46531e-11
novel_mir1070	0	39	0.001	1.38	10.4305	Up	2.69736e-11	4.46368e-11
novel_mir4169	0	39	0.001	1.38	10.4305	Up	2.69736e-11	4.46204e-11
novel_mir4283	0	39	0.001	1.38	10.4305	Up	2.69736e-11	4.46041e-11
novel_mir5710	0	39	0.001	1.38	10.4305	Up	2.69736e-11	4.45878e-11
novel_mir5814	0	39	0.001	1.38	10.4305	Up	2.69736e-11	4.45715e-11
novel_mir2485	0	39	0.001	1.38	10.4305	Up	2.69736e-11	4.45552e-11
novel_mir652	0	39	0.001	1.38	10.4305	Up	2.69736e-11	4.4539e-11
novel_mir2274	0	39	0.001	1.38	10.4305	Up	2.69736e-11	4.45227e-11
novel_mir958	0	39	0.001	1.38	10.4305	Up	2.69736e-11	4.45064e-11
novel_mir1736	0	39	0.001	1.38	10.4305	Up	2.69736e-11	4.44902e-11
novel_mir1467	0	39	0.001	1.38	10.4305	Up	2.69736e-11	4.4474e-11
novel_mir5511	0	38	0.001	1.35	10.3987	Up	5.04302e-11	8.22493e-11
novel_mir4145	0	38	0.001	1.35	10.3987	Up	5.04302e-11	8.22196e-11
novel_mir1613	0	38	0.001	1.35	10.3987	Up	5.04302e-11	8.219e-11
novel_mir5724	0	38	0.001	1.35	10.3987	Up	5.04302e-11	8.21603e-11
novel_mir3412	0	38	0.001	1.35	10.3987	Up	5.04302e-11	8.21307e-11
novel_mir2708	0	38	0.001	1.35	10.3987	Up	5.04302e-11	8.21012e-11
novel_mir2641	0	38	0.001	1.35	10.3987	Up	5.04302e-11	8.20716e-11
novel_mir2670	0	38	0.001	1.35	10.3987	Up	5.04302e-11	8.20421e-11
novel_mir1479	0	38	0.001	1.35	10.3987	Up	5.04302e-11	8.20126e-11
novel_mir4948	0	38	0.001	1.35	10.3987	Up	5.04302e-11	8.19831e-11
novel_mir5825	0	38	0.001	1.35	10.3987	Up	5.04302e-11	8.19536e-11
novel_mir1440	0	38	0.001	1.35	10.3987	Up	5.04302e-11	8.19242e-11
novel_mir51	0	38	0.001	1.35	10.3987	Up	5.04302e-11	8.18947e-11
novel_mir4061	0	38	0.001	1.35	10.3987	Up	5.04302e-11	8.18653e-11
novel_mir3085	0	38	0.001	1.35	10.3987	Up	5.04302e-11	8.18359e-11
novel_mir3563	0	38	0.001	1.35	10.3987	Up	5.04302e-11	8.18066e-11
novel_mir667	0	38	0.001	1.35	10.3987	Up	5.04302e-11	8.17772e-11
novel_mir709	0	38	0.001	1.35	10.3987	Up	5.04302e-11	8.17479e-11
novel_mir3039	0	38	0.001	1.35	10.3987	Up	5.04302e-11	8.17186e-11
novel_mir2879	0	38	0.001	1.35	10.3987	Up	5.04302e-11	8.16893e-11
novel_mir4736	0	38	0.001	1.35	10.3987	Up	5.04302e-11	8.16601e-11
novel_mir5285	0	38	0.001	1.35	10.3987	Up	5.04302e-11	8.16308e-11
novel_mir3294	0	38	0.001	1.35	10.3987	Up	5.04302e-11	8.16016e-11
novel_mir519	0	38	0.001	1.35	10.3987	Up	5.04302e-11	8.15724e-11
novel_mir3802	0	38	0.001	1.35	10.3987	Up	5.04302e-11	8.15433e-11
novel_mir4825	0	38	0.001	1.35	10.3987	Up	5.04302e-11	8.15141e-11
novel_mir2306	0	38	0.001	1.35	10.3987	Up	5.04302e-11	8.1485e-11
novel_mir3077	0	38	0.001	1.35	10.3987	Up	5.04302e-11	8.14559e-11
novel_mir2664	0	38	0.001	1.35	10.3987	Up	5.04302e-11	8.14268e-11
novel_mir3550	0	37	0.001	1.31	10.3554	Up	9.4285e-11	1.51695e-10
novel_mir4240	0	37	0.001	1.31	10.3554	Up	9.4285e-11	1.51641e-10
novel_mir4954	0	37	0.001	1.31	10.3554	Up	9.4285e-11	1.51587e-10
novel_mir3536	0	37	0.001	1.31	10.3554	Up	9.4285e-11	1.51533e-10
novel_mir4670	0	37	0.001	1.31	10.3554	Up	9.4285e-11	1.51479e-10
novel_mir2467	0	37	0.001	1.31	10.3554	Up	9.4285e-11	1.51425e-10
novel_mir2342	0	37	0.001	1.31	10.3554	Up	9.4285e-11	1.51372e-10
novel_mir2683	0	37	0.001	1.31	10.3554	Up	9.4285e-11	1.51318e-10
novel_mir5633	0	37	0.001	1.31	10.3554	Up	9.4285e-11	1.51264e-10
novel_mir1388	0	37	0.001	1.31	10.3554	Up	9.4285e-11	1.51211e-10
novel_mir2733	0	37	0.001	1.31	10.3554	Up	9.4285e-11	1.51157e-10
novel_mir2157	0	37	0.001	1.31	10.3554	Up	9.4285e-11	1.51103e-10
novel_mir3460	0	37	0.001	1.31	10.3554	Up	9.4285e-11	1.5105e-10
novel_mir2742	0	37	0.001	1.31	10.3554	Up	9.4285e-11	1.50996e-10
novel_mir3734	0	37	0.001	1.31	10.3554	Up	9.4285e-11	1.50943e-10
novel_mir474	0	37	0.001	1.31	10.3554	Up	9.4285e-11	1.50889e-10
novel_mir3575	0	37	0.001	1.31	10.3554	Up	9.4285e-11	1.50836e-10
novel_mir1151	0	37	0.001	1.31	10.3554	Up	9.4285e-11	1.50783e-10
novel_mir4717	0	37	0.001	1.31	10.3554	Up	9.4285e-11	1.50729e-10
novel_mir1970	0	37	0.001	1.31	10.3554	Up	9.4285e-11	1.50676e-10
novel_mir1306	0	37	0.001	1.31	10.3554	Up	9.4285e-11	1.50623e-10
novel_mir3571	0	37	0.001	1.31	10.3554	Up	9.4285e-11	1.5057e-10
novel_mir1259	0	37	0.001	1.31	10.3554	Up	9.4285e-11	1.50516e-10
novel_mir1605	0	37	0.001	1.31	10.3554	Up	9.4285e-11	1.50463e-10
novel_mir5686	0	36	0.001	1.28	10.3219	Up	1.76277e-10	2.78848e-10
novel_mir6054	0	36	0.001	1.28	10.3219	Up	1.76277e-10	2.7875e-10
novel_mir70	0	36	0.001	1.28	10.3219	Up	1.76277e-10	2.78653e-10
novel_mir5229	0	36	0.001	1.28	10.3219	Up	1.76277e-10	2.78555e-10
novel_mir789	0	36	0.001	1.28	10.3219	Up	1.76277e-10	2.78458e-10
novel_mir1513	0	36	0.001	1.28	10.3219	Up	1.76277e-10	2.78361e-10
novel_mir939	0	36	0.001	1.28	10.3219	Up	1.76277e-10	2.78263e-10
novel_mir1155	0	36	0.001	1.28	10.3219	Up	1.76277e-10	2.78166e-10
novel_mir1345	0	36	0.001	1.28	10.3219	Up	1.76277e-10	2.78069e-10
novel_mir2317	0	36	0.001	1.28	10.3219	Up	1.76277e-10	2.77972e-10
novel_mir3258	0	36	0.001	1.28	10.3219	Up	1.76277e-10	2.77875e-10
novel_mir2250	0	36	0.001	1.28	10.3219	Up	1.76277e-10	2.77778e-10
novel_mir1508	0	36	0.001	1.28	10.3219	Up	1.76277e-10	2.77682e-10
novel_mir5428	0	36	0.001	1.28	10.3219	Up	1.76277e-10	2.77585e-10
novel_mir2607	0	36	0.001	1.28	10.3219	Up	1.76277e-10	2.77488e-10
novel_mir1852	0	36	0.001	1.28	10.3219	Up	1.76277e-10	2.77392e-10
novel_mir2819	0	36	0.001	1.28	10.3219	Up	1.76277e-10	2.77295e-10
novel_mir5881	0	36	0.001	1.28	10.3219	Up	1.76277e-10	2.77199e-10
novel_mir1526	0	36	0.001	1.28	10.3219	Up	1.76277e-10	2.77102e-10
novel_mir2331	0	36	0.001	1.28	10.3219	Up	1.76277e-10	2.77006e-10
novel_mir2804	0	36	0.001	1.28	10.3219	Up	1.76277e-10	2.7691e-10
novel_mir4449	0	36	0.001	1.28	10.3219	Up	1.76277e-10	2.76814e-10
novel_mir5653	0	36	0.001	1.28	10.3219	Up	1.76277e-10	2.76718e-10
novel_mir5079	0	36	0.001	1.28	10.3219	Up	1.76277e-10	2.76621e-10
novel_mir291	0	36	0.001	1.28	10.3219	Up	1.76277e-10	2.76526e-10
novel_mir868	0	36	0.001	1.28	10.3219	Up	1.76277e-10	2.7643e-10
novel_mir5284	0	36	0.001	1.28	10.3219	Up	1.76277e-10	2.76334e-10
novel_mir5731	0	36	0.001	1.28	10.3219	Up	1.76277e-10	2.76238e-10
novel_mir4226	0	36	0.001	1.28	10.3219	Up	1.76277e-10	2.76142e-10
novel_mir3268	0	36	0.001	1.28	10.3219	Up	1.76277e-10	2.76047e-10
novel_mir921	0	36	0.001	1.28	10.3219	Up	1.76277e-10	2.75951e-10
novel_mir3307	0	36	0.001	1.28	10.3219	Up	1.76277e-10	2.75855e-10
novel_mir4594	0	35	0.001	1.24	10.2761	Up	3.2957e-10	5.08701e-10
novel_mir1486	0	35	0.001	1.24	10.2761	Up	3.2957e-10	5.08528e-10
novel_mir5185	0	35	0.001	1.24	10.2761	Up	3.2957e-10	5.08354e-10
novel_mir1689	0	35	0.001	1.24	10.2761	Up	3.2957e-10	5.08181e-10
novel_mir13	0	35	0.001	1.24	10.2761	Up	3.2957e-10	5.08007e-10
novel_mir891	0	35	0.001	1.24	10.2761	Up	3.2957e-10	5.07834e-10
novel_mir2827	0	35	0.001	1.24	10.2761	Up	3.2957e-10	5.07661e-10
novel_mir2808	0	35	0.001	1.24	10.2761	Up	3.2957e-10	5.07488e-10
novel_mir4391	0	35	0.001	1.24	10.2761	Up	3.2957e-10	5.07316e-10
novel_mir1755	0	35	0.001	1.24	10.2761	Up	3.2957e-10	5.07143e-10
novel_mir4004	0	35	0.001	1.24	10.2761	Up	3.2957e-10	5.0697e-10
novel_mir4043	0	35	0.001	1.24	10.2761	Up	3.2957e-10	5.06798e-10
novel_mir2198	0	35	0.001	1.24	10.2761	Up	3.2957e-10	5.06626e-10
novel_mir2271	0	35	0.001	1.24	10.2761	Up	3.2957e-10	5.06453e-10
novel_mir4351	0	35	0.001	1.24	10.2761	Up	3.2957e-10	5.06281e-10
novel_mir3405	0	35	0.001	1.24	10.2761	Up	3.2957e-10	5.06109e-10
novel_mir4244	0	35	0.001	1.24	10.2761	Up	3.2957e-10	5.05938e-10
novel_mir5405	0	35	0.001	1.24	10.2761	Up	3.2957e-10	5.05766e-10
novel_mir2926	0	35	0.001	1.24	10.2761	Up	3.2957e-10	5.05594e-10
novel_mir2897	0	35	0.001	1.24	10.2761	Up	3.2957e-10	5.05423e-10
novel_mir3188	0	35	0.001	1.24	10.2761	Up	3.2957e-10	5.05251e-10
novel_mir1225	0	35	0.001	1.24	10.2761	Up	3.2957e-10	5.0508e-10
novel_mir5061	0	35	0.001	1.24	10.2761	Up	3.2957e-10	5.04909e-10
novel_mir3558	0	35	0.001	1.24	10.2761	Up	3.2957e-10	5.04738e-10
novel_mir5936	0	35	0.001	1.24	10.2761	Up	3.2957e-10	5.04567e-10
novel_mir4502	0	35	0.001	1.24	10.2761	Up	3.2957e-10	5.04396e-10
novel_mir5368	0	35	0.001	1.24	10.2761	Up	3.2957e-10	5.04225e-10
novel_mir5805	0	35	0.001	1.24	10.2761	Up	3.2957e-10	5.04055e-10
novel_mir2486	0	35	0.001	1.24	10.2761	Up	3.2957e-10	5.03884e-10
novel_mir5818	0	34	0.001	1.2	10.2288	Up	6.16168e-10	9.33231e-10
novel_mir5535	0	34	0.001	1.2	10.2288	Up	6.16168e-10	9.32919e-10
novel_mir4137	0	34	0.001	1.2	10.2288	Up	6.16168e-10	9.32606e-10
novel_mir1289	0	34	0.001	1.2	10.2288	Up	6.16168e-10	9.32294e-10
novel_mir3323	0	34	0.001	1.2	10.2288	Up	6.16168e-10	9.31982e-10
novel_mir6060	0	34	0.001	1.2	10.2288	Up	6.16168e-10	9.31671e-10
novel_mir2955	0	34	0.001	1.2	10.2288	Up	6.16168e-10	9.31359e-10
novel_mir6095	0	34	0.001	1.2	10.2288	Up	6.16168e-10	9.31048e-10
novel_mir3728	0	34	0.001	1.2	10.2288	Up	6.16168e-10	9.30737e-10
novel_mir147	0	34	0.001	1.2	10.2288	Up	6.16168e-10	9.30426e-10
novel_mir1471	0	34	0.001	1.2	10.2288	Up	6.16168e-10	9.30115e-10
novel_mir2978	0	34	0.001	1.2	10.2288	Up	6.16168e-10	9.29805e-10
novel_mir312	0	34	0.001	1.2	10.2288	Up	6.16168e-10	9.29495e-10
novel_mir5599	0	34	0.001	1.2	10.2288	Up	6.16168e-10	9.29185e-10
novel_mir3265	0	34	0.001	1.2	10.2288	Up	6.16168e-10	9.28875e-10
novel_mir2369	0	34	0.001	1.2	10.2288	Up	6.16168e-10	9.28565e-10
novel_mir5940	0	34	0.001	1.2	10.2288	Up	6.16168e-10	9.28256e-10
novel_mir1674	0	34	0.001	1.2	10.2288	Up	6.16168e-10	9.27947e-10
novel_mir1893	0	33	0.001	1.17	10.1923	Up	1.152e-09	1.71491e-09
novel_mir4005	0	33	0.001	1.17	10.1923	Up	1.152e-09	1.71435e-09
novel_mir3076	0	33	0.001	1.17	10.1923	Up	1.152e-09	1.71378e-09
novel_mir1506	0	33	0.001	1.17	10.1923	Up	1.152e-09	1.71322e-09
novel_mir561	0	33	0.001	1.17	10.1923	Up	1.152e-09	1.71265e-09
novel_mir3769	0	33	0.001	1.17	10.1923	Up	1.152e-09	1.71209e-09
novel_mir452	0	33	0.001	1.17	10.1923	Up	1.152e-09	1.71153e-09
novel_mir2596	0	33	0.001	1.17	10.1923	Up	1.152e-09	1.71097e-09
novel_mir2000	0	33	0.001	1.17	10.1923	Up	1.152e-09	1.7104e-09
novel_mir4447	0	33	0.001	1.17	10.1923	Up	1.152e-09	1.70984e-09
novel_mir276	0	33	0.001	1.17	10.1923	Up	1.152e-09	1.70928e-09
novel_mir2991	0	33	0.001	1.17	10.1923	Up	1.152e-09	1.70872e-09
novel_mir3004	0	33	0.001	1.17	10.1923	Up	1.152e-09	1.70816e-09
novel_mir1837	0	33	0.001	1.17	10.1923	Up	1.152e-09	1.7076e-09
novel_mir2014	0	33	0.001	1.17	10.1923	Up	1.152e-09	1.70704e-09
novel_mir1758	0	33	0.001	1.17	10.1923	Up	1.152e-09	1.70648e-09
novel_mir5530	0	33	0.001	1.17	10.1923	Up	1.152e-09	1.70592e-09
novel_mir983	0	33	0.001	1.17	10.1923	Up	1.152e-09	1.70536e-09
novel_mir4349	0	33	0.001	1.17	10.1923	Up	1.152e-09	1.70481e-09
novel_mir5443	0	32	0.001	1.13	10.1421	Up	2.1538e-09	3.15737e-09
novel_mir5955	0	32	0.001	1.13	10.1421	Up	2.1538e-09	3.15635e-09
novel_mir4535	0	32	0.001	1.13	10.1421	Up	2.1538e-09	3.15532e-09
novel_mir4444	0	32	0.001	1.13	10.1421	Up	2.1538e-09	3.1543e-09
novel_mir413	0	32	0.001	1.13	10.1421	Up	2.1538e-09	3.15328e-09
novel_mir2729	0	32	0.001	1.13	10.1421	Up	2.1538e-09	3.15226e-09
novel_mir5483	0	32	0.001	1.13	10.1421	Up	2.1538e-09	3.15124e-09
novel_mir1797	0	32	0.001	1.13	10.1421	Up	2.1538e-09	3.15022e-09
novel_mir2283	0	32	0.001	1.13	10.1421	Up	2.1538e-09	3.1492e-09
novel_mir3647	0	32	0.001	1.13	10.1421	Up	2.1538e-09	3.14818e-09
novel_mir1984	0	32	0.001	1.13	10.1421	Up	2.1538e-09	3.14717e-09
novel_mir4946	0	32	0.001	1.13	10.1421	Up	2.1538e-09	3.14615e-09
novel_mir1349	0	32	0.001	1.13	10.1421	Up	2.1538e-09	3.14513e-09
novel_mir2184	0	32	0.001	1.13	10.1421	Up	2.1538e-09	3.14412e-09
novel_mir5914	0	32	0.001	1.13	10.1421	Up	2.1538e-09	3.1431e-09
novel_mir5274	0	32	0.001	1.13	10.1421	Up	2.1538e-09	3.14209e-09
novel_mir3302	0	32	0.001	1.13	10.1421	Up	2.1538e-09	3.14107e-09
novel_mir5627	0	32	0.001	1.13	10.1421	Up	2.1538e-09	3.14006e-09
novel_mir5999	0	31	0.001	1.1	10.1033	Up	4.02676e-09	5.85369e-09
novel_mir4479	0	31	0.001	1.1	10.1033	Up	4.02676e-09	5.85181e-09
novel_mir3662	0	31	0.001	1.1	10.1033	Up	4.02676e-09	5.84993e-09
novel_mir2474	0	31	0.001	1.1	10.1033	Up	4.02676e-09	5.84805e-09
novel_mir1224	0	31	0.001	1.1	10.1033	Up	4.02676e-09	5.84617e-09
novel_mir6033	0	31	0.001	1.1	10.1033	Up	4.02676e-09	5.8443e-09
novel_mir2529	0	31	0.001	1.1	10.1033	Up	4.02676e-09	5.84242e-09
novel_mir4268	0	31	0.001	1.1	10.1033	Up	4.02676e-09	5.84055e-09
novel_mir3023	0	31	0.001	1.1	10.1033	Up	4.02676e-09	5.83867e-09
novel_mir4086	0	31	0.001	1.1	10.1033	Up	4.02676e-09	5.8368e-09
novel_mir2952	0	31	0.001	1.1	10.1033	Up	4.02676e-09	5.83493e-09
novel_mir4298	0	31	0.001	1.1	10.1033	Up	4.02676e-09	5.83306e-09
novel_mir2435	0	31	0.001	1.1	10.1033	Up	4.02676e-09	5.83119e-09
novel_mir4916	0	31	0.001	1.1	10.1033	Up	4.02676e-09	5.82932e-09
novel_mir4586	0	31	0.001	1.1	10.1033	Up	4.02676e-09	5.82746e-09
novel_mir6052	0	31	0.001	1.1	10.1033	Up	4.02676e-09	5.82559e-09
novel_mir3497	0	30	0.001	1.06	10.0498	Up	7.5285e-09	1.07778e-08
novel_mir4952	0	30	0.001	1.06	10.0498	Up	7.5285e-09	1.07744e-08
novel_mir3255	0	30	0.001	1.06	10.0498	Up	7.5285e-09	1.0771e-08
novel_mir1494	0	30	0.001	1.06	10.0498	Up	7.5285e-09	1.07676e-08
novel_mir71	0	30	0.001	1.06	10.0498	Up	7.5285e-09	1.07642e-08
novel_mir3288	0	30	0.001	1.06	10.0498	Up	7.5285e-09	1.07608e-08
novel_mir3636	0	30	0.001	1.06	10.0498	Up	7.5285e-09	1.07574e-08
novel_mir2447	0	30	0.001	1.06	10.0498	Up	7.5285e-09	1.0754e-08
novel_mir3483	0	30	0.001	1.06	10.0498	Up	7.5285e-09	1.07506e-08
novel_mir5024	0	30	0.001	1.06	10.0498	Up	7.5285e-09	1.07472e-08
novel_mir2108	0	30	0.001	1.06	10.0498	Up	7.5285e-09	1.07438e-08
novel_mir1067	0	30	0.001	1.06	10.0498	Up	7.5285e-09	1.07404e-08
novel_mir1922	0	30	0.001	1.06	10.0498	Up	7.5285e-09	1.0737e-08
novel_mir4843	0	30	0.001	1.06	10.0498	Up	7.5285e-09	1.07336e-08
novel_mir151	0	30	0.001	1.06	10.0498	Up	7.5285e-09	1.07302e-08
novel_mir3358	0	30	0.001	1.06	10.0498	Up	7.5285e-09	1.07269e-08
novel_mir5791	0	30	0.001	1.06	10.0498	Up	7.5285e-09	1.07235e-08
novel_mir3581	0	30	0.001	1.06	10.0498	Up	7.5285e-09	1.07201e-08
novel_mir5879	0	30	0.001	1.06	10.0498	Up	7.5285e-09	1.07167e-08
novel_mir2975	0	29	0.001	1.03	10.0084	Up	1.40754e-08	1.98983e-08
novel_mir4280	0	29	0.001	1.03	10.0084	Up	1.40754e-08	1.98921e-08
novel_mir2546	0	29	0.001	1.03	10.0084	Up	1.40754e-08	1.98859e-08
novel_mir1606	0	29	0.001	1.03	10.0084	Up	1.40754e-08	1.98797e-08
novel_mir4369	0	29	0.001	1.03	10.0084	Up	1.40754e-08	1.98735e-08
novel_mir5048	0	29	0.001	1.03	10.0084	Up	1.40754e-08	1.98673e-08
novel_mir1878	0	29	0.001	1.03	10.0084	Up	1.40754e-08	1.98611e-08
novel_mir2941	0	29	0.001	1.03	10.0084	Up	1.40754e-08	1.98549e-08
novel_mir1027	0	29	0.001	1.03	10.0084	Up	1.40754e-08	1.98487e-08
novel_mir4597	0	29	0.001	1.03	10.0084	Up	1.40754e-08	1.98425e-08
novel_mir2704	0	29	0.001	1.03	10.0084	Up	1.40754e-08	1.98363e-08
novel_mir2048	0	29	0.001	1.03	10.0084	Up	1.40754e-08	1.98301e-08
novel_mir2568	0	29	0.001	1.03	10.0084	Up	1.40754e-08	1.9824e-08
novel_mir4432	0	29	0.001	1.03	10.0084	Up	1.40754e-08	1.98178e-08
novel_mir299	0	29	0.001	1.03	10.0084	Up	1.40754e-08	1.98116e-08
novel_mir583	0	29	0.001	1.03	10.0084	Up	1.40754e-08	1.98054e-08
novel_mir1247	0	29	0.001	1.03	10.0084	Up	1.40754e-08	1.97993e-08
novel_mir5720	0	29	0.001	1.03	10.0084	Up	1.40754e-08	1.97931e-08
novel_mir981	0	28	0.001	0.99	9.95128	Up	2.63156e-08	3.65508e-08
novel_mir597	0	28	0.001	0.99	9.95128	Up	2.63156e-08	3.65396e-08
novel_mir3440	0	28	0.001	0.99	9.95128	Up	2.63156e-08	3.65283e-08
novel_mir5417	0	28	0.001	0.99	9.95128	Up	2.63156e-08	3.65171e-08
novel_mir4698	0	28	0.001	0.99	9.95128	Up	2.63156e-08	3.65059e-08
novel_mir4075	0	28	0.001	0.99	9.95128	Up	2.63156e-08	3.64947e-08
novel_mir1693	0	28	0.001	0.99	9.95128	Up	2.63156e-08	3.64835e-08
novel_mir1803	0	28	0.001	0.99	9.95128	Up	2.63156e-08	3.64724e-08
novel_mir4816	0	28	0.001	0.99	9.95128	Up	2.63156e-08	3.64612e-08
novel_mir2690	0	28	0.001	0.99	9.95128	Up	2.63156e-08	3.645e-08
novel_mir690	0	28	0.001	0.99	9.95128	Up	2.63156e-08	3.64388e-08
novel_mir4541	0	28	0.001	0.99	9.95128	Up	2.63156e-08	3.64277e-08
novel_mir993	0	28	0.001	0.99	9.95128	Up	2.63156e-08	3.64165e-08
novel_mir1017	0	28	0.001	0.99	9.95128	Up	2.63156e-08	3.64054e-08
novel_mir3371	0	28	0.001	0.99	9.95128	Up	2.63156e-08	3.63943e-08
novel_mir2329	0	27	0.001	0.96	9.90689	Up	4.92e-08	6.73836e-08
novel_mir5111	0	27	0.001	0.96	9.90689	Up	4.92e-08	6.73632e-08
novel_mir2995	0	27	0.001	0.96	9.90689	Up	4.92e-08	6.73428e-08
novel_mir1358	0	27	0.001	0.96	9.90689	Up	4.92e-08	6.73224e-08
novel_mir1328	0	27	0.001	0.96	9.90689	Up	4.92e-08	6.7302e-08
novel_mir3374	0	27	0.001	0.96	9.90689	Up	4.92e-08	6.72817e-08
novel_mir5094	0	27	0.001	0.96	9.90689	Up	4.92e-08	6.72613e-08
novel_mir3517	0	27	0.001	0.96	9.90689	Up	4.92e-08	6.7241e-08
novel_mir2218	0	27	0.001	0.96	9.90689	Up	4.92e-08	6.72207e-08
novel_mir2847	0	26	0.001	0.92	9.84549	Up	9.19852e-08	1.25336e-07
novel_mir5331	0	26	0.001	0.92	9.84549	Up	9.19852e-08	1.25298e-07
novel_mir4017	0	26	0.001	0.92	9.84549	Up	9.19852e-08	1.25261e-07
novel_mir2848	0	26	0.001	0.92	9.84549	Up	9.19852e-08	1.25223e-07
novel_mir3481	0	26	0.001	0.92	9.84549	Up	9.19852e-08	1.25185e-07
novel_mir1432	0	26	0.001	0.92	9.84549	Up	9.19852e-08	1.25147e-07
novel_mir4770	0	26	0.001	0.92	9.84549	Up	9.19852e-08	1.2511e-07
novel_mir1960	0	26	0.001	0.92	9.84549	Up	9.19852e-08	1.25072e-07
novel_mir4512	0	26	0.001	0.92	9.84549	Up	9.19852e-08	1.25035e-07
novel_mir695	0	26	0.001	0.92	9.84549	Up	9.19852e-08	1.24997e-07
novel_mir5087	0	26	0.001	0.92	9.84549	Up	9.19852e-08	1.24959e-07
novel_mir2446	0	26	0.001	0.92	9.84549	Up	9.19852e-08	1.24922e-07
novel_mir2655	0	25	0.001	0.89	9.79766	Up	1.71977e-07	2.31677e-07
novel_mir1332	0	25	0.001	0.89	9.79766	Up	1.71977e-07	2.31608e-07
novel_mir5259	0	25	0.001	0.89	9.79766	Up	1.71977e-07	2.31539e-07
novel_mir2642	0	25	0.001	0.89	9.79766	Up	1.71977e-07	2.3147e-07
novel_mir2230	0	25	0.001	0.89	9.79766	Up	1.71977e-07	2.31401e-07
novel_mir3472	0	25	0.001	0.89	9.79766	Up	1.71977e-07	2.31332e-07
novel_mir1138	0	25	0.001	0.89	9.79766	Up	1.71977e-07	2.31263e-07
novel_mir1216	0	25	0.001	0.89	9.79766	Up	1.71977e-07	2.31195e-07
novel_mir3490	0	25	0.001	0.89	9.79766	Up	1.71977e-07	2.31126e-07
novel_mir4976	0	25	0.001	0.89	9.79766	Up	1.71977e-07	2.31057e-07
novel_mir920	0	25	0.001	0.89	9.79766	Up	1.71977e-07	2.30988e-07
novel_mir2580	0	24	0.001	0.85	9.73132	Up	3.2153e-07	4.28928e-07
novel_mir1082	0	24	0.001	0.85	9.73132	Up	3.2153e-07	4.28802e-07
novel_mir5537	0	24	0.001	0.85	9.73132	Up	3.2153e-07	4.28675e-07
novel_mir3010	0	24	0.001	0.85	9.73132	Up	3.2153e-07	4.28549e-07
novel_mir1752	0	24	0.001	0.85	9.73132	Up	3.2153e-07	4.28422e-07
novel_mir2781	0	24	0.001	0.85	9.73132	Up	3.2153e-07	4.28296e-07
novel_mir1181	0	24	0.001	0.85	9.73132	Up	3.2153e-07	4.2817e-07
[truncated: 1,697 more rows]

## Sheet: normal vs positive controls
miRNA id	Count(JK5)	Count(JQ9)	TPM(JK5)	TPM(JQ9)	log2 Ratio(JQ9/JK5)	Up-Down-Regulation(JQ9/JK5)	P-value	FDR
novel_mir4668	0	218	0.001	8.74	13.0934	Up	1.38054e-65	1.19318e-64
novel_mir2935	0	196	0.001	7.86	12.9403	Up	4.85178e-59	3.96411e-58
novel_mir870	0	175	0.001	7.02	12.7773	Up	8.59436e-53	6.42302e-52
novel_mir5889	0	170	0.001	6.82	12.7356	Up	2.64184e-51	1.92347e-50
novel_mir880	0	138	0.001	5.53	12.4331	Up	8.77298e-42	5.46376e-41
novel_mir463	0	114	0.001	4.57	12.158	Up	1.2136e-34	6.71844e-34
novel_mir3185	0	112	0.001	4.49	12.1325	Up	4.77698e-34	2.62166e-33
novel_mir727	0	111	0.001	4.45	12.1196	Up	9.47748e-34	5.1568e-33
novel_mir3386	0	90	0.001	3.61	11.8178	Up	1.67883e-27	7.95876e-27
novel_mir2323	0	87	0.001	3.49	11.769	Up	1.31106e-26	5.98097e-26
novel_mir1986	0	71	0.001	2.85	11.4767	Up	7.55512e-22	2.95802e-21
mmu-miR-378b	0	63	0.001	2.53	11.3049	Up	1.81364e-19	6.33902e-19
novel_mir2991	0	63	0.001	2.53	11.3049	Up	1.81364e-19	6.33031e-19
novel_mir922	0	57	0.001	2.29	11.1611	Up	1.10607e-17	3.54417e-17
novel_mir994	0	55	0.001	2.21	11.1098	Up	4.35372e-17	1.36074e-16
novel_mir3522	0	55	0.001	2.21	11.1098	Up	4.35372e-17	1.35907e-16
novel_mir3986	0	51	0.001	2.04	10.9944	Up	6.74554e-16	1.98155e-15
novel_mir2556	0	48	0.001	1.92	10.9069	Up	5.26784e-15	1.45495e-14
novel_mir4464	0	44	0.001	1.76	10.7814	Up	8.16182e-14	2.08225e-13
novel_mir3136	0	43	0.001	1.72	10.7482	Up	1.61929e-13	4.04187e-13
novel_mir4402	0	40	0.001	1.6	10.6439	Up	1.26457e-12	2.99466e-12
novel_mir2743	0	39	0.001	1.56	10.6073	Up	2.50888e-12	5.79551e-12
novel_mir461	0	38	0.001	1.52	10.5699	Up	4.9776e-12	1.10657e-11
novel_mir2060	0	37	0.001	1.48	10.5314	Up	9.87548e-12	2.12118e-11
novel_mir972	0	35	0.001	1.4	10.4512	Up	3.8872e-11	7.8579e-11
novel_mir5924	0	35	0.001	1.4	10.4512	Up	3.8872e-11	7.85165e-11
novel_mir558	0	34	0.001	1.36	10.4094	Up	7.71214e-11	1.51676e-10
novel_mir897	0	34	0.001	1.36	10.4094	Up	7.71214e-11	1.51559e-10
novel_mir2648	0	33	0.001	1.32	10.3663	Up	1.53008e-10	2.91667e-10
novel_mir2521	0	32	0.001	1.28	10.3219	Up	3.03566e-10	5.58957e-10
novel_mir5390	0	32	0.001	1.28	10.3219	Up	3.03566e-10	5.58553e-10
novel_mir6059	0	31	0.001	1.24	10.2761	Up	6.0227e-10	1.07924e-09
novel_mir1108	0	30	0.001	1.2	10.2288	Up	1.19489e-09	2.06968e-09
novel_mir476	0	30	0.001	1.2	10.2288	Up	1.19489e-09	2.06827e-09
novel_mir4757	0	30	0.001	1.2	10.2288	Up	1.19489e-09	2.06687e-09
novel_mir1170	0	27	0.001	1.08	10.0768	Up	9.33138e-09	1.46909e-08
novel_mir170	0	25	0.001	1	9.96578	Up	3.67302e-08	5.48363e-08
novel_mir3623	0	25	0.001	1	9.96578	Up	3.67302e-08	5.48041e-08
novel_mir3415	0	25	0.001	1	9.96578	Up	3.67302e-08	5.4772e-08
novel_mir909	0	24	0.001	0.96	9.90689	Up	7.28722e-08	1.06235e-07
novel_mir349	0	23	0.001	0.92	9.84549	Up	1.44577e-07	2.05006e-07
novel_mir5318	0	23	0.001	0.92	9.84549	Up	1.44577e-07	2.04892e-07
mmu-miR-1306-3p	0	23	0.001	0.92	9.84549	Up	1.44577e-07	2.04778e-07
novel_mir4264	0	21	0.001	0.84	9.71425	Up	5.69086e-07	7.7453e-07
novel_mir373	0	21	0.001	0.84	9.71425	Up	5.69086e-07	7.74115e-07
novel_mir4926	0	20	0.001	0.8	9.64386	Up	1.12906e-06	1.50049e-06
mmu-miR-675-3p	0	20	0.001	0.8	9.64386	Up	1.12906e-06	1.49971e-06
novel_mir5829	0	19	0.001	0.76	9.56986	Up	2.24004e-06	2.92194e-06
mmu-miR-669b-5p	0	18	0.001	0.72	9.49185	Up	4.4442e-06	5.66051e-06
novel_mir878	0	18	0.001	0.72	9.49185	Up	4.4442e-06	5.65767e-06
novel_mir4572	0	18	0.001	0.72	9.49185	Up	4.4442e-06	5.65484e-06
novel_mir4257	0	18	0.001	0.72	9.49185	Up	4.4442e-06	5.65201e-06
novel_mir1304	0	17	0.001	0.68	9.40939	Up	8.81724e-06	1.10205e-05
novel_mir5992	0	17	0.001	0.68	9.40939	Up	8.81724e-06	1.1015e-05
novel_mir4719	0	16	0.001	0.64	9.32193	Up	1.74933e-05	2.15048e-05
novel_mir3672	0	16	0.001	0.64	9.32193	Up	1.74933e-05	2.14944e-05
novel_mir501	0	15	0.001	0.6	9.22882	Up	3.47064e-05	4.19149e-05
novel_mir422	0	15	0.001	0.6	9.22882	Up	3.47064e-05	4.1895e-05
novel_mir1549	0	15	0.001	0.6	9.22882	Up	3.47064e-05	4.18751e-05
novel_mir5781	0	15	0.001	0.6	9.22882	Up	3.47064e-05	4.18552e-05
novel_mir6067	0	14	0.001	0.56	9.12928	Up	6.88572e-05	8.17599e-05
novel_mir3832	0	14	0.001	0.56	9.12928	Up	6.88572e-05	8.17217e-05
mmu-miR-669c-5p	0	14	0.001	0.56	9.12928	Up	6.88572e-05	8.16835e-05
novel_mir4387	0	14	0.001	0.56	9.12928	Up	6.88572e-05	8.16454e-05
novel_mir5012	0	14	0.001	0.56	9.12928	Up	6.88572e-05	8.16073e-05
novel_mir2465	0	14	0.001	0.56	9.12928	Up	6.88572e-05	8.15693e-05
mmu-miR-18a-3p	0	13	0.001	0.52	9.02237	Up	0.000136612	0.000160337
novel_mir785	0	13	0.001	0.52	9.02237	Up	0.000136612	0.000160263
novel_mir277	0	13	0.001	0.52	9.02237	Up	0.000136612	0.000160189
novel_mir4540	0	13	0.001	0.52	9.02237	Up	0.000136612	0.000160115
novel_mir978	0	13	0.001	0.52	9.02237	Up	0.000136612	0.000160042
novel_mir70	0	12	0.001	0.48	8.90689	Up	0.000271036	0.00031262
novel_mir5795	0	12	0.001	0.48	8.90689	Up	0.000271036	0.000312478
mmu-miR-134-5p	0	12	0.001	0.48	8.90689	Up	0.000271036	0.000312337
novel_mir3769	0	12	0.001	0.48	8.90689	Up	0.000271036	0.000312195
novel_mir4889	0	12	0.001	0.48	8.90689	Up	0.000271036	0.000312054
novel_mir5254	0	11	0.001	0.44	8.78136	Up	0.000537732	0.000610808
novel_mir1673	0	11	0.001	0.44	8.78136	Up	0.000537732	0.000610535
mmu-miR-378a-5p	0	11	0.001	0.44	8.78136	Up	0.000537732	0.000610262
novel_mir6102	0	11	0.001	0.44	8.78136	Up	0.000537732	0.00060999
novel_mir3819	0	11	0.001	0.44	8.78136	Up	0.000537732	0.000609718
novel_mir280	0	11	0.001	0.44	8.78136	Up	0.000537732	0.000609446
novel_mir3686	0	11	0.001	0.44	8.78136	Up	0.000537732	0.000609174
novel_mir2646	0	11	0.001	0.44	8.78136	Up	0.000537732	0.000608902
novel_mir4430	0	11	0.001	0.44	8.78136	Up	0.000537732	0.000608631
novel_mir3678	0	11	0.001	0.44	8.78136	Up	0.000537732	0.00060836
novel_mir3193	85	8388	3.46	336.34	6.603	Up	0	0
novel_mir5888	60	5772	2.44	231.44	6.56761	Up	0	0
novel_mir282	61	1901	2.49	76.22	4.93595	Up	0	0
novel_mir4468	36	1039	1.47	41.66	4.82477	Up	1.69853e-253	3.31997e-252
novel_mir4409	49	1147	2	45.99	4.52325	Up	2.70904e-269	5.55135e-268
novel_mir124	34	540	1.39	21.65	3.96121	Up	8.56612e-117	1.0219e-115
novel_mir105	122	1839	4.97	73.74	3.89113	Up	0	0
novel_mir5799	90	1203	3.67	48.24	3.71638	Up	1.64084e-245	3.15861e-244
mmu-miR-341-3p	8	100	0.33	4.01	3.60306	Up	2.68258e-21	1.02349e-20
novel_mir4136	40	465	1.63	18.65	3.51623	Up	1.18092e-91	1.21981e-90
novel_mir1	2470	26472	100.65	1061.45	3.39862	Up	0	0
novel_mir78	78	799	3.18	32.04	3.33278	Up	3.6964e-149	5.02276e-148
novel_mir169	117	1019	4.77	40.86	3.09863	Up	2.9699e-177	4.49197e-176
novel_mir1670	51	443	2.08	17.76	3.09398	Up	6.1787e-78	5.79339e-77
novel_mir4542	1711	12301	69.72	493.24	2.82265	Up	0	0
novel_mir606	26	176	1.06	7.06	2.7356	Up	2.82158e-28	1.37878e-27
novel_mir3557	29	193	1.18	7.74	2.71355	Up	1.39575e-30	7.10742e-30
mmu-let-7e-3p	4	21	0.16	0.84	2.39232	Up	0.000618298	0.000698886
novel_mir696	24	126	0.98	5.05	2.36543	Up	9.10548e-18	2.92134e-17
novel_mir4658	55	251	2.24	10.06	2.16706	Up	1.34966e-30	6.8865e-30
mmu-miR-122-5p	2134	9545	86.96	382.73	2.1379	Up	0	0
mmu-miR-297a-5p	11	49	0.45	1.96	2.12286	Up	6.30038e-07	8.56569e-07
novel_mir255	262	1025	10.68	41.1	1.94423	Up	2.21256e-104	2.41292e-103
novel_mir135	71	272	2.89	10.91	1.91651	Up	2.3497e-28	1.1504e-27
novel_mir1502	85	296	3.46	11.87	1.77848	Up	6.64118e-28	3.20213e-27
novel_mir1577	14	48	0.57	1.92	1.75207	Up	1.48098e-05	1.82236e-05
novel_mir5850	670	2285	27.3	91.62	1.74676	Up	3.63238e-199	5.99343e-198
mmu-miR-411-5p	42	132	1.71	5.29	1.62927	Up	6.79082e-12	1.46357e-11
novel_mir1246	12	36	0.49	1.44	1.55522	Up	0.000577712	0.0006533
novel_mir5257	28	82	1.14	3.29	1.52905	Up	2.62192e-07	3.64259e-07
novel_mir3247	51	148	2.08	5.93	1.51145	Up	5.52432e-12	1.19162e-11
novel_mir102	23	63	0.94	2.53	1.4284	Up	1.77119e-05	2.17525e-05
novel_mir174	129	346	5.26	13.87	1.39883	Up	2.32452e-23	9.5731e-23
novel_mir3679	221	592	9.01	23.74	1.39772	Up	9.4162e-39	5.60341e-38
novel_mir3628	43	115	1.75	4.61	1.39741	Up	1.11439e-08	1.75335e-08
mmu-miR-101b-3p	55	146	2.24	5.85	1.38494	Up	1.51094e-10	2.88236e-10
novel_mir3751	165	425	6.72	17.04	1.34239	Up	1.17989e-26	5.43134e-26
novel_mir3524	1511	3814	61.57	152.93	1.31257	Up	7.3422e-218	1.32316e-216
novel_mir1597	26	65	1.06	2.61	1.29999	Up	5.1013e-05	6.14041e-05
novel_mir2999	45	111	1.83	4.45	1.28196	Up	1.54007e-07	2.18012e-07
novel_mir3724	40	89	1.63	3.57	1.13105	Up	2.06888e-05	2.53717e-05
novel_mir3139	49	109	2	4.37	1.12763	Up	2.4216e-06	3.15715e-06
novel_mir307	166	364	6.76	14.6	1.11087	Up	1.70689e-17	5.45561e-17
mmu-miR-1a-3p	116	237	4.73	9.5	1.00609	Up	2.23136e-10	4.11756e-10
novel_mir2602	2968	0	120.95	0.001	-16.8841	Down	0	0
novel_mir93	1875	0	76.41	0.001	-16.2215	Down	0	0
novel_mir3523	1451	0	59.13	0.001	-15.8516	Down	0	0
novel_mir691	1332	0	54.28	0.001	-15.7281	Down	0	0
novel_mir128	974	0	39.69	0.001	-15.2765	Down	2.31852e-297	5.03535e-296
novel_mir114	964	0	39.28	0.001	-15.2615	Down	2.57458e-294	5.54407e-293
novel_mir301	855	0	34.84	0.001	-15.0885	Down	4.04212e-261	8.08742e-260
novel_mir1359	729	0	29.71	0.001	-14.8587	Down	9.5467e-223	1.74519e-221
novel_mir298	655	0	26.69	0.001	-14.704	Down	3.28488e-200	5.52774e-199
novel_mir313	653	0	26.61	0.001	-14.6997	Down	1.33543e-199	2.23245e-198
novel_mir818	650	0	26.49	0.001	-14.6932	Down	1.09463e-198	1.78299e-197
novel_mir4378	603	0	24.57	0.001	-14.5846	Down	2.25474e-184	3.5149e-183
novel_mir274	592	0	24.12	0.001	-14.5579	Down	5.04828e-181	7.82176e-180
novel_mir4313	579	0	23.59	0.001	-14.5259	Down	4.59502e-177	6.90884e-176
novel_mir188	563	0	22.94	0.001	-14.4856	Down	3.4283e-172	5.09433e-171
novel_mir3972	542	0	22.09	0.001	-14.4311	Down	8.52354e-166	1.23762e-164
novel_mir3871	508	0	20.7	0.001	-14.3373	Down	1.92888e-155	2.72294e-154
novel_mir3441	449	0	18.3	0.001	-14.1596	Down	1.79362e-137	2.42424e-136
novel_mir5283	436	0	17.77	0.001	-14.1172	Down	1.63258e-133	2.14942e-132
novel_mir3656	432	0	17.6	0.001	-14.1033	Down	2.69818e-132	3.53406e-131
novel_mir5298	387	0	15.77	0.001	-13.9449	Down	1.3671e-118	1.64636e-117
novel_mir42	383	0	15.61	0.001	-13.9302	Down	2.25944e-117	2.70813e-116
novel_mir107	365	0	14.87	0.001	-13.8601	Down	6.85318e-112	8.02485e-111
novel_mir734	365	0	14.87	0.001	-13.8601	Down	6.85318e-112	7.98804e-111
novel_mir5882	360	0	14.67	0.001	-13.8406	Down	2.2837e-110	2.62574e-109
novel_mir3906	359	0	14.63	0.001	-13.8366	Down	4.60458e-110	5.27038e-109
novel_mir829	357	0	14.55	0.001	-13.8287	Down	1.87193e-109	2.11403e-108
novel_mir220	349	0	14.22	0.001	-13.7956	Down	5.1131e-107	5.72352e-106
novel_mir3637	347	0	14.14	0.001	-13.7875	Down	2.07866e-106	2.3065e-105
novel_mir1720	326	0	13.28	0.001	-13.697	Down	5.16802e-100	5.56438e-99
novel_mir410	315	0	12.84	0.001	-13.6484	Down	1.1571e-96	1.23537e-95
novel_mir3876	307	0	12.51	0.001	-13.6108	Down	3.16058e-94	3.31861e-93
novel_mir3803	306	0	12.47	0.001	-13.6062	Down	6.37258e-94	6.66367e-93
novel_mir161	301	0	12.27	0.001	-13.5828	Down	2.12356e-92	2.20244e-91
novel_mir2649	296	0	12.06	0.001	-13.5579	Down	7.07638e-91	7.27979e-90
novel_mir773	295	0	12.02	0.001	-13.5531	Down	1.42679e-90	1.46189e-89
novel_mir3505	287	0	11.7	0.001	-13.5142	Down	3.89724e-88	3.91418e-87
novel_mir4808	286	0	11.65	0.001	-13.508	Down	7.85792e-88	7.86101e-87
novel_mir767	286	0	11.65	0.001	-13.508	Down	7.85792e-88	7.83019e-87
novel_mir589	285	0	11.61	0.001	-13.5031	Down	1.58437e-87	1.56649e-86
novel_mir581	280	0	11.41	0.001	-13.478	Down	5.27964e-86	5.17975e-85
novel_mir513	278	0	11.33	0.001	-13.4679	Down	2.14636e-85	2.09765e-84
novel_mir115	276	0	11.25	0.001	-13.4576	Down	8.72574e-85	8.46264e-84
novel_mir4262	274	0	11.17	0.001	-13.4473	Down	3.54734e-84	3.41431e-83
novel_mir41	269	0	10.96	0.001	-13.42	Down	1.18209e-82	1.13347e-81
novel_mir3885	267	0	10.88	0.001	-13.4094	Down	4.80562e-82	4.57344e-81
novel_mir3378	264	0	10.76	0.001	-13.3934	Down	3.9391e-81	3.7348e-80
novel_mir3516	264	0	10.76	0.001	-13.3934	Down	3.9391e-81	3.72091e-80
novel_mir4125	249	0	10.15	0.001	-13.3092	Down	1.45761e-76	1.36168e-75
novel_mir3707	241	0	9.82	0.001	-13.2615	Down	3.98142e-74	3.65227e-73
novel_mir3556	236	0	9.62	0.001	-13.2318	Down	1.32674e-72	1.20833e-71
novel_mir142	232	0	9.45	0.001	-13.2061	Down	2.19272e-71	1.98989e-70
novel_mir1877	229	0	9.33	0.001	-13.1877	Down	1.79735e-70	1.61952e-69
novel_mir5420	228	0	9.29	0.001	-13.1815	Down	3.62394e-70	3.25386e-69
novel_mir662	228	0	9.29	0.001	-13.1815	Down	3.62394e-70	3.24241e-69
novel_mir4054	227	0	9.25	0.001	-13.1752	Down	7.30686e-70	6.51464e-69
novel_mir3890	223	0	9.09	0.001	-13.1501	Down	1.20762e-68	1.06547e-67
mmu-miR-130b-3p	223	0	9.09	0.001	-13.1501	Down	1.20762e-68	1.06178e-67
novel_mir26	221	0	9.01	0.001	-13.1373	Down	4.9094e-68	4.30165e-67
novel_mir4060	220	0	8.96	0.001	-13.1293	Down	9.8987e-68	8.6435e-67
novel_mir1294	210	0	8.56	0.001	-13.0634	Down	1.09919e-64	9.37264e-64
novel_mir482	209	0	8.52	0.001	-13.0566	Down	2.21628e-64	1.87719e-63
novel_mir3717	209	0	8.52	0.001	-13.0566	Down	2.21628e-64	1.87095e-63
novel_mir4238	206	0	8.39	0.001	-13.0345	Down	1.81665e-63	1.51348e-62
novel_mir763	205	0	8.35	0.001	-13.0276	Down	3.66286e-63	3.04161e-62
novel_mir895	201	0	8.19	0.001	-12.9996	Down	6.05368e-62	5.01055e-61
novel_mir32	189	0	7.7	0.001	-12.9106	Down	2.73284e-58	2.21858e-57
novel_mir1653	187	0	7.62	0.001	-12.8956	Down	1.111e-57	8.96205e-57
novel_mir3485	186	0	7.58	0.001	-12.888	Down	2.24008e-57	1.80128e-56
novel_mir973	185	0	7.54	0.001	-12.8803	Down	4.5166e-57	3.58646e-56
novel_mir3567	182	0	7.42	0.001	-12.8572	Down	3.7022e-56	2.92152e-55
novel_mir5920	182	0	7.42	0.001	-12.8572	Down	3.7022e-56	2.91247e-55
novel_mir3165	182	0	7.42	0.001	-12.8572	Down	3.7022e-56	2.90348e-55
novel_mir1817	179	0	7.29	0.001	-12.8317	Down	3.03466e-55	2.37264e-54
novel_mir3554	177	0	7.21	0.001	-12.8158	Down	1.2337e-54	9.5574e-54
novel_mir164	177	0	7.21	0.001	-12.8158	Down	1.2337e-54	9.52835e-54
novel_mir268	176	0	7.17	0.001	-12.8078	Down	2.48748e-54	1.91536e-53
novel_mir4784	176	0	7.17	0.001	-12.8078	Down	2.48748e-54	1.90957e-53
novel_mir3790	175	0	7.13	0.001	-12.7997	Down	5.01542e-54	3.83861e-53
novel_mir3821	175	0	7.13	0.001	-12.7997	Down	5.01542e-54	3.82708e-53
novel_mir1450	173	0	7.05	0.001	-12.7834	Down	2.03896e-53	1.54196e-52
novel_mir3664	172	0	7.01	0.001	-12.7752	Down	4.11108e-53	3.09978e-52
novel_mir3719	171	0	6.97	0.001	-12.7669	Down	8.28908e-53	6.21314e-52
novel_mir322	170	0	6.93	0.001	-12.7586	Down	1.67131e-52	1.24539e-51
novel_mir2656	169	0	6.89	0.001	-12.7503	Down	3.3698e-52	2.5037e-51
novel_mir4813	169	0	6.89	0.001	-12.7503	Down	3.3698e-52	2.4964e-51
novel_mir180	169	0	6.89	0.001	-12.7503	Down	3.3698e-52	2.48915e-51
novel_mir556	168	0	6.85	0.001	-12.7419	Down	6.79446e-52	5.00427e-51
novel_mir1709	168	0	6.85	0.001	-12.7419	Down	6.79446e-52	4.9898e-51
novel_mir4155	161	0	6.56	0.001	-12.6795	Down	9.20454e-50	6.58838e-49
novel_mir1203	160	0	6.52	0.001	-12.6707	Down	1.85589e-49	1.3136e-48
novel_mir646	159	0	6.48	0.001	-12.6618	Down	3.74198e-49	2.6339e-48
novel_mir2298	154	0	6.28	0.001	-12.6165	Down	1.24695e-47	8.6335e-47
novel_mir686	153	0	6.23	0.001	-12.605	Down	2.5142e-47	1.73603e-46
novel_mir4563	152	0	6.19	0.001	-12.5957	Down	5.0693e-47	3.48138e-46
novel_mir1488	151	0	6.15	0.001	-12.5864	Down	1.02211e-46	6.98167e-46
novel_mir723	149	0	6.07	0.001	-12.5675	Down	4.15524e-46	2.80065e-45
novel_mir605	149	0	6.07	0.001	-12.5675	Down	4.15524e-46	2.79324e-45
novel_mir3129	149	0	6.07	0.001	-12.5675	Down	4.15524e-46	2.78587e-45
novel_mir5822	148	0	6.03	0.001	-12.5579	Down	8.3781e-46	5.6023e-45
novel_mir4296	148	0	6.03	0.001	-12.5579	Down	8.3781e-46	5.5876e-45
novel_mir736	147	0	5.99	0.001	-12.5483	Down	1.68926e-45	1.12073e-44
novel_mir3463	147	0	5.99	0.001	-12.5483	Down	1.68926e-45	1.11781e-44
novel_mir330	146	0	5.95	0.001	-12.5387	Down	3.406e-45	2.24796e-44
novel_mir328	146	0	5.95	0.001	-12.5387	Down	3.406e-45	2.24214e-44
novel_mir3484	145	0	5.91	0.001	-12.5289	Down	6.86744e-45	4.4859e-44
novel_mir388	144	0	5.87	0.001	-12.5191	Down	1.38466e-44	8.99855e-44
novel_mir1749	144	0	5.87	0.001	-12.5191	Down	1.38466e-44	8.97559e-44
novel_mir1101	138	0	5.62	0.001	-12.4564	Down	9.3034e-43	5.93968e-42
novel_mir489	138	0	5.62	0.001	-12.4564	Down	9.3034e-43	5.9248e-42
novel_mir908	136	0	5.54	0.001	-12.4357	Down	3.78216e-42	2.39066e-41
novel_mir3764	136	0	5.54	0.001	-12.4357	Down	3.78216e-42	2.38473e-41
novel_mir311	136	0	5.54	0.001	-12.4357	Down	3.78216e-42	2.37883e-41
novel_mir2141	136	0	5.54	0.001	-12.4357	Down	3.78216e-42	2.37296e-41
novel_mir507	135	0	5.5	0.001	-12.4252	Down	7.62588e-42	4.77275e-41
novel_mir1552	135	0	5.5	0.001	-12.4252	Down	7.62588e-42	4.76102e-41
novel_mir1013	134	0	5.46	0.001	-12.4147	Down	1.53759e-41	9.55259e-41
novel_mir44	134	0	5.46	0.001	-12.4147	Down	1.53759e-41	9.5293e-41
novel_mir3353	133	0	5.42	0.001	-12.4041	Down	3.1002e-41	1.91669e-40
novel_mir1611	132	0	5.38	0.001	-12.3934	Down	6.25084e-41	3.85519e-40
novel_mir3351	131	0	5.34	0.001	-12.3826	Down	1.26034e-40	7.73558e-40
novel_mir1085	130	0	5.3	0.001	-12.3718	Down	2.5412e-40	1.55221e-39
novel_mir1403	129	0	5.26	0.001	-12.3608	Down	5.12374e-40	3.11469e-39
novel_mir671	128	0	5.22	0.001	-12.3498	Down	1.03309e-39	6.2651e-39
novel_mir752	127	0	5.18	0.001	-12.3387	Down	2.08298e-39	1.2602e-38
novel_mir1503	127	0	5.18	0.001	-12.3387	Down	2.08298e-39	1.25721e-38
novel_mir535	126	0	5.13	0.001	-12.3247	Down	4.19988e-39	2.52291e-38
novel_mir407	126	0	5.13	0.001	-12.3247	Down	4.19988e-39	2.51696e-38
novel_mir4663	125	0	5.09	0.001	-12.3134	Down	8.4681e-39	5.05104e-38
novel_mir1523	124	0	5.05	0.001	-12.3021	Down	1.7074e-38	1.01367e-37
novel_mir3837	124	0	5.05	0.001	-12.3021	Down	1.7074e-38	1.01131e-37
novel_mir1571	123	0	5.01	0.001	-12.2906	Down	3.44258e-38	2.0296e-37
novel_mir266	122	0	4.97	0.001	-12.279	Down	6.9412e-38	4.07335e-37
novel_mir4062	122	0	4.97	0.001	-12.279	Down	6.9412e-38	4.06396e-37
novel_mir153	121	0	4.93	0.001	-12.2674	Down	1.39954e-37	8.15647e-37
novel_mir1546	120	0	4.89	0.001	-12.2556	Down	2.82184e-37	1.6408e-36
novel_mir186	119	0	4.85	0.001	-12.2438	Down	5.68962e-37	3.30076e-36
novel_mir1107	119	0	4.85	0.001	-12.2438	Down	5.68962e-37	3.29324e-36
novel_mir2662	118	0	4.81	0.001	-12.2318	Down	1.14718e-36	6.60995e-36
novel_mir1507	118	0	4.81	0.001	-12.2318	Down	1.14718e-36	6.595e-36
novel_mir148	118	0	4.81	0.001	-12.2318	Down	1.14718e-36	6.58011e-36
novel_mir3592	117	0	4.77	0.001	-12.2198	Down	2.31304e-36	1.32375e-35
novel_mir819	117	0	4.77	0.001	-12.2198	Down	2.31304e-36	1.32077e-35
novel_mir2477	117	0	4.77	0.001	-12.2198	Down	2.31304e-36	1.31781e-35
novel_mir343	115	0	4.69	0.001	-12.1954	Down	9.40332e-36	5.30974e-35
novel_mir4124	115	0	4.69	0.001	-12.1954	Down	9.40332e-36	5.29797e-35
novel_mir6125	114	0	4.65	0.001	-12.183	Down	1.89597e-35	1.06585e-34
novel_mir194	114	0	4.65	0.001	-12.183	Down	1.89597e-35	1.0635e-34
novel_mir97	113	0	4.6	0.001	-12.1674	Down	3.8228e-35	2.13489e-34
novel_mir3723	113	0	4.6	0.001	-12.1674	Down	3.8228e-35	2.13021e-34
novel_mir2268	113	0	4.6	0.001	-12.1674	Down	3.8228e-35	2.12554e-34
novel_mir1867	111	0	4.52	0.001	-12.1421	Down	1.5541e-34	8.58472e-34
novel_mir3606	110	0	4.48	0.001	-12.1293	Down	3.1335e-34	1.72716e-33
novel_mir997	110	0	4.48	0.001	-12.1293	Down	3.1335e-34	1.72343e-33
novel_mir5853	109	0	4.44	0.001	-12.1163	Down	6.31798e-34	3.45247e-33
novel_mir333	109	0	4.44	0.001	-12.1163	Down	6.31798e-34	3.44506e-33
novel_mir380	107	0	4.36	0.001	-12.0901	Down	2.56848e-33	1.38567e-32
novel_mir4393	106	0	4.32	0.001	-12.0768	Down	5.17878e-33	2.78209e-32
novel_mir1368	103	0	4.2	0.001	-12.0362	Down	4.24498e-32	2.25659e-31
novel_mir683	103	0	4.2	0.001	-12.0362	Down	4.24498e-32	2.25188e-31
novel_mir1291	103	0	4.2	0.001	-12.0362	Down	4.24498e-32	2.24719e-31
novel_mir4624	103	0	4.2	0.001	-12.0362	Down	4.24498e-32	2.24251e-31
novel_mir756	103	0	4.2	0.001	-12.0362	Down	4.24498e-32	2.23786e-31
novel_mir2722	103	0	4.2	0.001	-12.0362	Down	4.24498e-32	2.23323e-31
mmu-miR-744-5p	102	0	4.16	0.001	-12.0224	Down	8.55906e-32	4.48424e-31
novel_mir4037	102	0	4.16	0.001	-12.0224	Down	8.55906e-32	4.47501e-31
novel_mir2803	102	0	4.16	0.001	-12.0224	Down	8.55906e-32	4.46583e-31
novel_mir3003	101	0	4.12	0.001	-12.0084	Down	1.72574e-31	8.98587e-31
mmu-let-7f-2-3p	101	0	4.12	0.001	-12.0084	Down	1.72574e-31	8.9675e-31
novel_mir432	101	0	4.12	0.001	-12.0084	Down	1.72574e-31	8.94919e-31
novel_mir92	101	0	4.12	0.001	-12.0084	Down	1.72574e-31	8.93097e-31
novel_mir3755	100	0	4.07	0.001	-11.9908	Down	3.47956e-31	1.79342e-30
novel_mir2681	99	0	4.03	0.001	-11.9766	Down	7.01576e-31	3.60142e-30
novel_mir31	99	0	4.03	0.001	-11.9766	Down	7.01576e-31	3.59416e-30
novel_mir5680	99	0	4.03	0.001	-11.9766	Down	7.01576e-31	3.58693e-30
novel_mir3627	98	0	3.99	0.001	-11.9622	Down	1.41457e-30	7.18883e-30
novel_mir3541	98	0	3.99	0.001	-11.9622	Down	1.41457e-30	7.17449e-30
novel_mir4290	97	0	3.95	0.001	-11.9476	Down	2.85216e-30	1.44369e-29
novel_mir4126	97	0	3.95	0.001	-11.9476	Down	2.85216e-30	1.44082e-29
novel_mir4050	96	0	3.91	0.001	-11.933	Down	5.75072e-30	2.89932e-29
novel_mir84	95	0	3.87	0.001	-11.9181	Down	1.1595e-29	5.83426e-29
novel_mir4115	95	0	3.87	0.001	-11.9181	Down	1.1595e-29	5.82273e-29
novel_mir490	94	0	3.83	0.001	-11.9031	Down	2.33788e-29	1.17171e-28
novel_mir245	93	0	3.79	0.001	-11.888	Down	4.7138e-29	2.3532e-28
novel_mir1966	93	0	3.79	0.001	-11.888	Down	4.7138e-29	2.34858e-28
mmu-miR-1843b-3p	92	0	3.75	0.001	-11.8727	Down	9.50432e-29	4.71689e-28
novel_mir3500	92	0	3.75	0.001	-11.8727	Down	9.50432e-29	4.7077e-28
novel_mir415	92	0	3.75	0.001	-11.8727	Down	9.50432e-29	4.69854e-28
novel_mir4800	91	0	3.71	0.001	-11.8572	Down	1.91633e-28	9.41857e-28
novel_mir4518	91	0	3.71	0.001	-11.8572	Down	1.91633e-28	9.40039e-28
novel_mir3503	90	0	3.67	0.001	-11.8416	Down	3.86386e-28	1.88086e-27
novel_mir488	90	0	3.67	0.001	-11.8416	Down	3.86386e-28	1.87726e-27
novel_mir2657	90	0	3.67	0.001	-11.8416	Down	3.86386e-28	1.87368e-27
novel_mir4284	90	0	3.67	0.001	-11.8416	Down	3.86386e-28	1.87011e-27
novel_mir2191	89	0	3.63	0.001	-11.8258	Down	7.79058e-28	3.74922e-27
novel_mir189	89	0	3.63	0.001	-11.8258	Down	7.79058e-28	3.74213e-27
novel_mir5177	89	0	3.63	0.001	-11.8258	Down	7.79058e-28	3.73507e-27
novel_mir3835	89	0	3.63	0.001	-11.8258	Down	7.79058e-28	3.72803e-27
novel_mir4725	88	0	3.59	0.001	-11.8098	Down	1.57079e-27	7.48853e-27
novel_mir3025	88	0	3.59	0.001	-11.8098	Down	1.57079e-27	7.47451e-27
novel_mir204	88	0	3.59	0.001	-11.8098	Down	1.57079e-27	7.46054e-27
novel_mir3913	87	0	3.55	0.001	-11.7936	Down	3.16716e-27	1.49586e-26
novel_mir1180	87	0	3.55	0.001	-11.7936	Down	3.16716e-27	1.49309e-26
novel_mir1698	87	0	3.55	0.001	-11.7936	Down	3.16716e-27	1.49032e-26
novel_mir55	87	0	3.55	0.001	-11.7936	Down	3.16716e-27	1.48757e-26
novel_mir3745	86	0	3.5	0.001	-11.7731	Down	6.38584e-27	2.96103e-26
novel_mir552	85	0	3.46	0.001	-11.7566	Down	1.28756e-26	5.91627e-26
novel_mir4737	85	0	3.46	0.001	-11.7566	Down	1.28756e-26	5.90559e-26
novel_mir382	85	0	3.46	0.001	-11.7566	Down	1.28756e-26	5.89495e-26
novel_mir3851	85	0	3.46	0.001	-11.7566	Down	1.28756e-26	5.88434e-26
novel_mir150	84	0	3.42	0.001	-11.7398	Down	2.59608e-26	1.18008e-25
novel_mir4745	84	0	3.42	0.001	-11.7398	Down	2.59608e-26	1.17797e-25
novel_mir5119	84	0	3.42	0.001	-11.7398	Down	2.59608e-26	1.17587e-25
novel_mir239	84	0	3.42	0.001	-11.7398	Down	2.59608e-26	1.17378e-25
novel_mir4365	84	0	3.42	0.001	-11.7398	Down	2.59608e-26	1.17169e-25
novel_mir1051	83	0	3.38	0.001	-11.7228	Down	5.2344e-26	2.35409e-25
novel_mir2834	83	0	3.38	0.001	-11.7228	Down	5.2344e-26	2.34993e-25
novel_mir1212	82	0	3.34	0.001	-11.7056	Down	1.0554e-25	4.70486e-25
novel_mir1025	82	0	3.34	0.001	-11.7056	Down	1.0554e-25	4.69662e-25
novel_mir3115	82	0	3.34	0.001	-11.7056	Down	1.0554e-25	4.68841e-25
novel_mir3934	82	0	3.34	0.001	-11.7056	Down	1.0554e-25	4.68023e-25
novel_mir351	82	0	3.34	0.001	-11.7056	Down	1.0554e-25	4.67208e-25
novel_mir5804	82	0	3.34	0.001	-11.7056	Down	1.0554e-25	4.66395e-25
novel_mir5608	82	0	3.34	0.001	-11.7056	Down	1.0554e-25	4.65585e-25
novel_mir929	82	0	3.34	0.001	-11.7056	Down	1.0554e-25	4.64778e-25
novel_mir1233	82	0	3.34	0.001	-11.7056	Down	1.0554e-25	4.63974e-25
novel_mir5424	82	0	3.34	0.001	-11.7056	Down	1.0554e-25	4.63173e-25
novel_mir1497	81	0	3.3	0.001	-11.6883	Down	2.12798e-25	9.27478e-25
novel_mir3429	81	0	3.3	0.001	-11.6883	Down	2.12798e-25	9.2589e-25
novel_mir154	81	0	3.3	0.001	-11.6883	Down	2.12798e-25	9.24307e-25
novel_mir2114	80	0	3.26	0.001	-11.6707	Down	4.29058e-25	1.85414e-24
novel_mir4152	80	0	3.26	0.001	-11.6707	Down	4.29058e-25	1.851e-24
novel_mir126	80	0	3.26	0.001	-11.6707	Down	4.29058e-25	1.84786e-24
novel_mir6150	80	0	3.26	0.001	-11.6707	Down	4.29058e-25	1.84473e-24
novel_mir2564	79	0	3.22	0.001	-11.6528	Down	8.65098e-25	3.7007e-24
novel_mir3151	78	0	3.18	0.001	-11.6348	Down	1.74428e-24	7.41171e-24
novel_mir2441	78	0	3.18	0.001	-11.6348	Down	1.74428e-24	7.39934e-24
novel_mir95	78	0	3.18	0.001	-11.6348	Down	1.74428e-24	7.38701e-24
novel_mir1339	78	0	3.18	0.001	-11.6348	Down	1.74428e-24	7.37472e-24
novel_mir342	78	0	3.18	0.001	-11.6348	Down	1.74428e-24	7.36247e-24
novel_mir103	78	0	3.18	0.001	-11.6348	Down	1.74428e-24	7.35026e-24
novel_mir480	77	0	3.14	0.001	-11.6165	Down	3.51694e-24	1.47711e-23
novel_mir5505	77	0	3.14	0.001	-11.6165	Down	3.51694e-24	1.47468e-23
novel_mir145	76	0	3.1	0.001	-11.5981	Down	7.0911e-24	2.96845e-23
novel_mir5778	76	0	3.1	0.001	-11.5981	Down	7.0911e-24	2.96357e-23
novel_mir900	76	0	3.1	0.001	-11.5981	Down	7.0911e-24	2.9587e-23
novel_mir2883	76	0	3.1	0.001	-11.5981	Down	7.0911e-24	2.95385e-23
novel_mir5291	76	0	3.1	0.001	-11.5981	Down	7.0911e-24	2.94902e-23
novel_mir4177	75	0	3.06	0.001	-11.5793	Down	1.42976e-23	5.91698e-23
novel_mir3253	74	0	3.02	0.001	-11.5603	Down	2.8828e-23	1.18531e-22
novel_mir862	73	0	2.97	0.001	-11.5362	Down	5.8125e-23	2.37835e-22
novel_mir944	73	0	2.97	0.001	-11.5362	Down	5.8125e-23	2.37453e-22
novel_mir152	73	0	2.97	0.001	-11.5362	Down	5.8125e-23	2.37072e-22
novel_mir258	73	0	2.97	0.001	-11.5362	Down	5.8125e-23	2.36692e-22
novel_mir4222	72	0	2.93	0.001	-11.5167	Down	1.17196e-22	4.73441e-22
novel_mir4695	72	0	2.93	0.001	-11.5167	Down	1.17196e-22	4.7269e-22
novel_mir346	72	0	2.93	0.001	-11.5167	Down	1.17196e-22	4.71941e-22
novel_mir1326	71	0	2.89	0.001	-11.4969	Down	2.36298e-22	9.50053e-22
novel_mir190	71	0	2.89	0.001	-11.4969	Down	2.36298e-22	9.48552e-22
novel_mir5494	71	0	2.89	0.001	-11.4969	Down	2.36298e-22	9.47056e-22
novel_mir5377	71	0	2.89	0.001	-11.4969	Down	2.36298e-22	9.45564e-22
novel_mir5543	71	0	2.89	0.001	-11.4969	Down	2.36298e-22	9.44077e-22
novel_mir3800	71	0	2.89	0.001	-11.4969	Down	2.36298e-22	9.42595e-22
novel_mir3999	70	0	2.85	0.001	-11.4767	Down	4.76444e-22	1.89163e-21
novel_mir141	70	0	2.85	0.001	-11.4767	Down	4.76444e-22	1.88868e-21
novel_mir5584	70	0	2.85	0.001	-11.4767	Down	4.76444e-22	1.88574e-21
novel_mir1231	70	0	2.85	0.001	-11.4767	Down	4.76444e-22	1.88281e-21
novel_mir496	70	0	2.85	0.001	-11.4767	Down	4.76444e-22	1.87988e-21
novel_mir4028	70	0	2.85	0.001	-11.4767	Down	4.76444e-22	1.87697e-21
novel_mir769	70	0	2.85	0.001	-11.4767	Down	4.76444e-22	1.87406e-21
novel_mir1351	70	0	2.85	0.001	-11.4767	Down	4.76444e-22	1.87117e-21
novel_mir1175	70	0	2.85	0.001	-11.4767	Down	4.76444e-22	1.86828e-21
novel_mir2045	69	0	2.81	0.001	-11.4564	Down	9.6064e-22	3.75536e-21
novel_mir555	69	0	2.81	0.001	-11.4564	Down	9.6064e-22	3.74959e-21
novel_mir182	69	0	2.81	0.001	-11.4564	Down	9.6064e-22	3.74384e-21
novel_mir429	69	0	2.81	0.001	-11.4564	Down	9.6064e-22	3.73811e-21
novel_mir1557	69	0	2.81	0.001	-11.4564	Down	9.6064e-22	3.73239e-21
novel_mir1997	69	0	2.81	0.001	-11.4564	Down	9.6064e-22	3.7267e-21
novel_mir4008	69	0	2.81	0.001	-11.4564	Down	9.6064e-22	3.72102e-21
novel_mir3421	69	0	2.81	0.001	-11.4564	Down	9.6064e-22	3.71535e-21
novel_mir364	68	0	2.77	0.001	-11.4357	Down	1.93691e-21	7.47978e-21
novel_mir166	68	0	2.77	0.001	-11.4357	Down	1.93691e-21	7.46843e-21
novel_mir5600	68	0	2.77	0.001	-11.4357	Down	1.93691e-21	7.45712e-21
novel_mir5997	68	0	2.77	0.001	-11.4357	Down	1.93691e-21	7.44584e-21
novel_mir5743	68	0	2.77	0.001	-11.4357	Down	1.93691e-21	7.43459e-21
novel_mir2943	68	0	2.77	0.001	-11.4357	Down	1.93691e-21	7.42338e-21
novel_mir4794	68	0	2.77	0.001	-11.4357	Down	1.93691e-21	7.4122e-21
novel_mir2611	68	0	2.77	0.001	-11.4357	Down	1.93691e-21	7.40105e-21
novel_mir1241	67	0	2.73	0.001	-11.4147	Down	3.90536e-21	1.48778e-20
novel_mir4570	67	0	2.73	0.001	-11.4147	Down	3.90536e-21	1.48556e-20
novel_mir956	67	0	2.73	0.001	-11.4147	Down	3.90536e-21	1.48334e-20
novel_mir975	67	0	2.73	0.001	-11.4147	Down	3.90536e-21	1.48112e-20
novel_mir836	67	0	2.73	0.001	-11.4147	Down	3.90536e-21	1.47892e-20
novel_mir2495	67	0	2.73	0.001	-11.4147	Down	3.90536e-21	1.47671e-20
novel_mir4779	67	0	2.73	0.001	-11.4147	Down	3.90536e-21	1.47452e-20
novel_mir4116	67	0	2.73	0.001	-11.4147	Down	3.90536e-21	1.47233e-20
novel_mir1733	67	0	2.73	0.001	-11.4147	Down	3.90536e-21	1.47015e-20
novel_mir139	67	0	2.73	0.001	-11.4147	Down	3.90536e-21	1.46798e-20
novel_mir3045	67	0	2.73	0.001	-11.4147	Down	3.90536e-21	1.46581e-20
novel_mir419	66	0	2.69	0.001	-11.3934	Down	7.87426e-21	2.9381e-20
novel_mir3243	66	0	2.69	0.001	-11.3934	Down	7.87426e-21	2.9338e-20
novel_mir401	66	0	2.69	0.001	-11.3934	Down	7.87426e-21	2.9295e-20
novel_mir66	66	0	2.69	0.001	-11.3934	Down	7.87426e-21	2.92522e-20
novel_mir5332	66	0	2.69	0.001	-11.3934	Down	7.87426e-21	2.92095e-20
novel_mir1191	66	0	2.69	0.001	-11.3934	Down	7.87426e-21	2.91669e-20
novel_mir2378	66	0	2.69	0.001	-11.3934	Down	7.87426e-21	2.91244e-20
novel_mir257	66	0	2.69	0.001	-11.3934	Down	7.87426e-21	2.90821e-20
novel_mir2031	66	0	2.69	0.001	-11.3934	Down	7.87426e-21	2.90399e-20
novel_mir4424	66	0	2.69	0.001	-11.3934	Down	7.87426e-21	2.89978e-20
novel_mir4331	66	0	2.69	0.001	-11.3934	Down	7.87426e-21	2.89559e-20
novel_mir4099	66	0	2.69	0.001	-11.3934	Down	7.87426e-21	2.8914e-20
novel_mir5892	66	0	2.69	0.001	-11.3934	Down	7.87426e-21	2.88723e-20
novel_mir1446	65	0	2.65	0.001	-11.3718	Down	1.58767e-20	5.80469e-20
novel_mir1641	65	0	2.65	0.001	-11.3718	Down	1.58767e-20	5.79635e-20
novel_mir521	65	0	2.65	0.001	-11.3718	Down	1.58767e-20	5.78803e-20
novel_mir1354	65	0	2.65	0.001	-11.3718	Down	1.58767e-20	5.77974e-20
novel_mir6151	65	0	2.65	0.001	-11.3718	Down	1.58767e-20	5.77147e-20
novel_mir3470	64	0	2.61	0.001	-11.3498	Down	3.20118e-20	1.15872e-19
novel_mir5063	64	0	2.61	0.001	-11.3498	Down	3.20118e-20	1.15707e-19
novel_mir1668	64	0	2.61	0.001	-11.3498	Down	3.20118e-20	1.15543e-19
novel_mir777	64	0	2.61	0.001	-11.3498	Down	3.20118e-20	1.15379e-19
novel_mir531	64	0	2.61	0.001	-11.3498	Down	3.20118e-20	1.15215e-19
novel_mir675	63	0	2.57	0.001	-11.3276	Down	6.45444e-20	2.30024e-19
novel_mir5042	63	0	2.57	0.001	-11.3276	Down	6.45444e-20	2.29702e-19
novel_mir1385	63	0	2.57	0.001	-11.3276	Down	6.45444e-20	2.29381e-19
novel_mir2413	63	0	2.57	0.001	-11.3276	Down	6.45444e-20	2.29061e-19
novel_mir6034	63	0	2.57	0.001	-11.3276	Down	6.45444e-20	2.28741e-19
novel_mir1337	63	0	2.57	0.001	-11.3276	Down	6.45444e-20	2.28422e-19
novel_mir1889	63	0	2.57	0.001	-11.3276	Down	6.45444e-20	2.28105e-19
novel_mir830	62	0	2.53	0.001	-11.3049	Down	1.30139e-19	4.59283e-19
novel_mir160	62	0	2.53	0.001	-11.3049	Down	1.30139e-19	4.58646e-19
novel_mir4837	62	0	2.53	0.001	-11.3049	Down	1.30139e-19	4.58011e-19
novel_mir784	62	0	2.53	0.001	-11.3049	Down	1.30139e-19	4.57377e-19
novel_mir5852	62	0	2.53	0.001	-11.3049	Down	1.30139e-19	4.56745e-19
novel_mir570	62	0	2.53	0.001	-11.3049	Down	1.30139e-19	4.56115e-19
novel_mir2308	62	0	2.53	0.001	-11.3049	Down	1.30139e-19	4.55487e-19
novel_mir5339	61	0	2.49	0.001	-11.2819	Down	2.62396e-19	9.12104e-19
novel_mir1840	61	0	2.49	0.001	-11.2819	Down	2.62396e-19	9.10858e-19
novel_mir5307	61	0	2.49	0.001	-11.2819	Down	2.62396e-19	9.09616e-19
novel_mir3809	61	0	2.49	0.001	-11.2819	Down	2.62396e-19	9.08376e-19
novel_mir2104	60	0	2.44	0.001	-11.2527	Down	5.29062e-19	1.82656e-18
novel_mir1487	60	0	2.44	0.001	-11.2527	Down	5.29062e-19	1.82408e-18
novel_mir1634	60	0	2.44	0.001	-11.2527	Down	5.29062e-19	1.82161e-18
novel_mir4095	60	0	2.44	0.001	-11.2527	Down	5.29062e-19	1.81914e-18
novel_mir4106	60	0	2.44	0.001	-11.2527	Down	5.29062e-19	1.81668e-18
novel_mir2976	60	0	2.44	0.001	-11.2527	Down	5.29062e-19	1.81423e-18
novel_mir1992	60	0	2.44	0.001	-11.2527	Down	5.29062e-19	1.81179e-18
novel_mir4279	60	0	2.44	0.001	-11.2527	Down	5.29062e-19	1.80935e-18
novel_mir1646	60	0	2.44	0.001	-11.2527	Down	5.29062e-19	1.80692e-18
novel_mir2009	60	0	2.44	0.001	-11.2527	Down	5.29062e-19	1.80449e-18
novel_mir4180	60	0	2.44	0.001	-11.2527	Down	5.29062e-19	1.80207e-18
novel_mir2714	59	0	2.4	0.001	-11.2288	Down	1.06674e-18	3.62376e-18
novel_mir5846	59	0	2.4	0.001	-11.2288	Down	1.06674e-18	3.61893e-18
novel_mir807	59	0	2.4	0.001	-11.2288	Down	1.06674e-18	3.6141e-18
novel_mir4135	59	0	2.4	0.001	-11.2288	Down	1.06674e-18	3.60929e-18
novel_mir5917	59	0	2.4	0.001	-11.2288	Down	1.06674e-18	3.60449e-18
novel_mir5234	59	0	2.4	0.001	-11.2288	Down	1.06674e-18	3.5997e-18
novel_mir3864	59	0	2.4	0.001	-11.2288	Down	1.06674e-18	3.59493e-18
novel_mir914	59	0	2.4	0.001	-11.2288	Down	1.06674e-18	3.59017e-18
novel_mir453	58	0	2.36	0.001	-11.2046	Down	2.15084e-18	7.21014e-18
novel_mir4333	58	0	2.36	0.001	-11.2046	Down	2.15084e-18	7.20064e-18
novel_mir1106	58	0	2.36	0.001	-11.2046	Down	2.15084e-18	7.19116e-18
novel_mir302	58	0	2.36	0.001	-11.2046	Down	2.15084e-18	7.18171e-18
novel_mir303	58	0	2.36	0.001	-11.2046	Down	2.15084e-18	7.17229e-18
novel_mir537	58	0	2.36	0.001	-11.2046	Down	2.15084e-18	7.16289e-18
novel_mir196	58	0	2.36	0.001	-11.2046	Down	2.15084e-18	7.15351e-18
novel_mir1989	58	0	2.36	0.001	-11.2046	Down	2.15084e-18	7.14416e-18
novel_mir2531	58	0	2.36	0.001	-11.2046	Down	2.15084e-18	7.13484e-18
novel_mir5352	58	0	2.36	0.001	-11.2046	Down	2.15084e-18	7.12553e-18
novel_mir1510	58	0	2.36	0.001	-11.2046	Down	2.15084e-18	7.11626e-18
novel_mir1647	58	0	2.36	0.001	-11.2046	Down	2.15084e-18	7.107e-18
novel_mir6115	57	0	2.32	0.001	-11.1799	Down	4.33666e-18	1.4237e-17
novel_mir2175	57	0	2.32	0.001	-11.1799	Down	4.33666e-18	1.42186e-17
novel_mir306	57	0	2.32	0.001	-11.1799	Down	4.33666e-18	1.42003e-17
novel_mir4108	56	0	2.28	0.001	-11.1548	Down	8.7439e-18	2.85215e-17
novel_mir1632	56	0	2.28	0.001	-11.1548	Down	8.7439e-18	2.84849e-17
novel_mir5833	56	0	2.28	0.001	-11.1548	Down	8.7439e-18	2.84485e-17
novel_mir1579	56	0	2.28	0.001	-11.1548	Down	8.7439e-18	2.84121e-17
novel_mir5051	56	0	2.28	0.001	-11.1548	Down	8.7439e-18	2.83758e-17
novel_mir1566	56	0	2.28	0.001	-11.1548	Down	8.7439e-18	2.83396e-17
novel_mir4191	56	0	2.28	0.001	-11.1548	Down	8.7439e-18	2.83035e-17
novel_mir327	56	0	2.28	0.001	-11.1548	Down	8.7439e-18	2.82675e-17
novel_mir1930	56	0	2.28	0.001	-11.1548	Down	8.7439e-18	2.82316e-17
novel_mir123	56	0	2.28	0.001	-11.1548	Down	8.7439e-18	2.81957e-17
novel_mir1694	56	0	2.28	0.001	-11.1548	Down	8.7439e-18	2.816e-17
novel_mir808	56	0	2.28	0.001	-11.1548	Down	8.7439e-18	2.81244e-17
novel_mir6093	56	0	2.28	0.001	-11.1548	Down	8.7439e-18	2.80888e-17
novel_mir4446	55	0	2.24	0.001	-11.1293	Down	1.76301e-17	5.6279e-17
novel_mir2901	55	0	2.24	0.001	-11.1293	Down	1.76301e-17	5.62084e-17
novel_mir2322	55	0	2.24	0.001	-11.1293	Down	1.76301e-17	5.61379e-17
novel_mir5477	55	0	2.24	0.001	-11.1293	Down	1.76301e-17	5.60677e-17
novel_mir3018	55	0	2.24	0.001	-11.1293	Down	1.76301e-17	5.59976e-17
novel_mir5884	54	0	2.2	0.001	-11.1033	Down	3.55472e-17	1.12766e-16
novel_mir2054	54	0	2.2	0.001	-11.1033	Down	3.55472e-17	1.12625e-16
novel_mir1419	54	0	2.2	0.001	-11.1033	Down	3.55472e-17	1.12485e-16
novel_mir5467	54	0	2.2	0.001	-11.1033	Down	3.55472e-17	1.12345e-16
novel_mir5104	54	0	2.2	0.001	-11.1033	Down	3.55472e-17	1.12206e-16
novel_mir758	54	0	2.2	0.001	-11.1033	Down	3.55472e-17	1.12066e-16
novel_mir3925	54	0	2.2	0.001	-11.1033	Down	3.55472e-17	1.11927e-16
novel_mir5091	54	0	2.2	0.001	-11.1033	Down	3.55472e-17	1.11789e-16
novel_mir630	54	0	2.2	0.001	-11.1033	Down	3.55472e-17	1.11651e-16
novel_mir3103	54	0	2.2	0.001	-11.1033	Down	3.55472e-17	1.11513e-16
novel_mir2163	54	0	2.2	0.001	-11.1033	Down	3.55472e-17	1.11375e-16
novel_mir4392	53	0	2.16	0.001	-11.0768	Down	7.16728e-17	2.22641e-16
novel_mir5929	53	0	2.16	0.001	-11.0768	Down	7.16728e-17	2.22369e-16
novel_mir2828	53	0	2.16	0.001	-11.0768	Down	7.16728e-17	2.22098e-16
novel_mir248	52	0	2.12	0.001	-11.0498	Down	1.44512e-16	4.45637e-16
novel_mir3740	52	0	2.12	0.001	-11.0498	Down	1.44512e-16	4.45096e-16
novel_mir1119	52	0	2.12	0.001	-11.0498	Down	1.44512e-16	4.44557e-16
novel_mir5021	52	0	2.12	0.001	-11.0498	Down	1.44512e-16	4.4402e-16
novel_mir5294	52	0	2.12	0.001	-11.0498	Down	1.44512e-16	4.43484e-16
novel_mir4985	52	0	2.12	0.001	-11.0498	Down	1.44512e-16	4.42949e-16
novel_mir2483	52	0	2.12	0.001	-11.0498	Down	1.44512e-16	4.42415e-16
novel_mir4348	52	0	2.12	0.001	-11.0498	Down	1.44512e-16	4.41883e-16
novel_mir437	52	0	2.12	0.001	-11.0498	Down	1.44512e-16	4.41352e-16
novel_mir3605	52	0	2.12	0.001	-11.0498	Down	1.44512e-16	4.40822e-16
novel_mir904	52	0	2.12	0.001	-11.0498	Down	1.44512e-16	4.40293e-16
novel_mir293	51	0	2.08	0.001	-11.0224	Down	2.91376e-16	8.80364e-16
novel_mir3963	51	0	2.08	0.001	-11.0224	Down	2.91376e-16	8.79319e-16
novel_mir1955	51	0	2.08	0.001	-11.0224	Down	2.91376e-16	8.78276e-16
novel_mir4860	51	0	2.08	0.001	-11.0224	Down	2.91376e-16	8.77235e-16
novel_mir793	51	0	2.08	0.001	-11.0224	Down	2.91376e-16	8.76197e-16
novel_mir1728	51	0	2.08	0.001	-11.0224	Down	2.91376e-16	8.75161e-16
novel_mir3739	51	0	2.08	0.001	-11.0224	Down	2.91376e-16	8.74128e-16
novel_mir619	51	0	2.08	0.001	-11.0224	Down	2.91376e-16	8.73097e-16
novel_mir1390	51	0	2.08	0.001	-11.0224	Down	2.91376e-16	8.72069e-16
novel_mir3902	50	0	2.04	0.001	-10.9944	Down	5.87492e-16	1.75008e-15
novel_mir1545	50	0	2.04	0.001	-10.9944	Down	5.87492e-16	1.74803e-15
novel_mir5491	50	0	2.04	0.001	-10.9944	Down	5.87492e-16	1.74598e-15
novel_mir638	50	0	2.04	0.001	-10.9944	Down	5.87492e-16	1.74395e-15
novel_mir1593	50	0	2.04	0.001	-10.9944	Down	5.87492e-16	1.74191e-15
novel_mir4085	50	0	2.04	0.001	-10.9944	Down	5.87492e-16	1.73988e-15
novel_mir3416	50	0	2.04	0.001	-10.9944	Down	5.87492e-16	1.73785e-15
novel_mir4910	50	0	2.04	0.001	-10.9944	Down	5.87492e-16	1.73583e-15
novel_mir202	50	0	2.04	0.001	-10.9944	Down	5.87492e-16	1.73382e-15
novel_mir3654	50	0	2.04	0.001	-10.9944	Down	5.87492e-16	1.73181e-15
novel_mir2219	50	0	2.04	0.001	-10.9944	Down	5.87492e-16	1.7298e-15
novel_mir1006	49	0	2	0.001	-10.9658	Down	1.18455e-15	3.47166e-15
novel_mir788	49	0	2	0.001	-10.9658	Down	1.18455e-15	3.46766e-15
novel_mir1974	49	0	2	0.001	-10.9658	Down	1.18455e-15	3.46367e-15
novel_mir2027	49	0	2	0.001	-10.9658	Down	1.18455e-15	3.45969e-15
novel_mir5316	49	0	2	0.001	-10.9658	Down	1.18455e-15	3.45572e-15
novel_mir580	49	0	2	0.001	-10.9658	Down	1.18455e-15	3.45176e-15
novel_mir2262	49	0	2	0.001	-10.9658	Down	1.18455e-15	3.4478e-15
novel_mir991	49	0	2	0.001	-10.9658	Down	1.18455e-15	3.44386e-15
novel_mir4237	49	0	2	0.001	-10.9658	Down	1.18455e-15	3.43992e-15
novel_mir1365	49	0	2	0.001	-10.9658	Down	1.18455e-15	3.43599e-15
novel_mir230	49	0	2	0.001	-10.9658	Down	1.18455e-15	3.43208e-15
novel_mir1399	49	0	2	0.001	-10.9658	Down	1.18455e-15	3.42817e-15
novel_mir1821	49	0	2	0.001	-10.9658	Down	1.18455e-15	3.42427e-15
novel_mir5327	49	0	2	0.001	-10.9658	Down	1.18455e-15	3.42038e-15
novel_mir5411	49	0	2	0.001	-10.9658	Down	1.18455e-15	3.41649e-15
novel_mir5767	49	0	2	0.001	-10.9658	Down	1.18455e-15	3.41262e-15
novel_mir532	48	0	1.96	0.001	-10.9366	Down	2.38838e-15	6.83432e-15
novel_mir697	48	0	1.96	0.001	-10.9366	Down	2.38838e-15	6.82663e-15
novel_mir4564	48	0	1.96	0.001	-10.9366	Down	2.38838e-15	6.81896e-15
novel_mir1894	48	0	1.96	0.001	-10.9366	Down	2.38838e-15	6.81131e-15
novel_mir1115	48	0	1.96	0.001	-10.9366	Down	2.38838e-15	6.80367e-15
novel_mir1551	48	0	1.96	0.001	-10.9366	Down	2.38838e-15	6.79605e-15
novel_mir4107	48	0	1.96	0.001	-10.9366	Down	2.38838e-15	6.78845e-15
novel_mir2916	48	0	1.96	0.001	-10.9366	Down	2.38838e-15	6.78086e-15
novel_mir2424	48	0	1.96	0.001	-10.9366	Down	2.38838e-15	6.7733e-15
novel_mir5296	48	0	1.96	0.001	-10.9366	Down	2.38838e-15	6.76575e-15
novel_mir5869	48	0	1.96	0.001	-10.9366	Down	2.38838e-15	6.75821e-15
novel_mir52	48	0	1.96	0.001	-10.9366	Down	2.38838e-15	6.75069e-15
novel_mir781	48	0	1.96	0.001	-10.9366	Down	2.38838e-15	6.74319e-15
novel_mir1473	48	0	1.96	0.001	-10.9366	Down	2.38838e-15	6.73571e-15
novel_mir1882	47	0	1.92	0.001	-10.9069	Down	4.8156e-15	1.35359e-14
novel_mir264	47	0	1.92	0.001	-10.9069	Down	4.8156e-15	1.35209e-14
novel_mir2047	47	0	1.92	0.001	-10.9069	Down	4.8156e-15	1.3506e-14
novel_mir4202	47	0	1.92	0.001	-10.9069	Down	4.8156e-15	1.34911e-14
novel_mir5058	47	0	1.92	0.001	-10.9069	Down	4.8156e-15	1.34763e-14
novel_mir2346	47	0	1.92	0.001	-10.9069	Down	4.8156e-15	1.34614e-14
novel_mir4751	47	0	1.92	0.001	-10.9069	Down	4.8156e-15	1.34466e-14
novel_mir5373	47	0	1.92	0.001	-10.9069	Down	4.8156e-15	1.34319e-14
novel_mir4219	47	0	1.92	0.001	-10.9069	Down	4.8156e-15	1.34171e-14
novel_mir249	47	0	1.92	0.001	-10.9069	Down	4.8156e-15	1.34025e-14
novel_mir4032	47	0	1.92	0.001	-10.9069	Down	4.8156e-15	1.33878e-14
novel_mir4101	47	0	1.92	0.001	-10.9069	Down	4.8156e-15	1.33732e-14
novel_mir542	47	0	1.92	0.001	-10.9069	Down	4.8156e-15	1.33586e-14
novel_mir4056	47	0	1.92	0.001	-10.9069	Down	4.8156e-15	1.3344e-14
mmu-miR-7044-3p	47	0	1.92	0.001	-10.9069	Down	4.8156e-15	1.33295e-14
novel_mir2759	47	0	1.92	0.001	-10.9069	Down	4.8156e-15	1.3315e-14
novel_mir4551	46	0	1.87	0.001	-10.8688	Down	9.70958e-15	2.67013e-14
novel_mir3633	46	0	1.87	0.001	-10.8688	Down	9.70958e-15	2.66725e-14
novel_mir3954	46	0	1.87	0.001	-10.8688	Down	9.70958e-15	2.66437e-14
novel_mir1912	46	0	1.87	0.001	-10.8688	Down	9.70958e-15	2.66149e-14
novel_mir4900	46	0	1.87	0.001	-10.8688	Down	9.70958e-15	2.65863e-14
novel_mir5343	46	0	1.87	0.001	-10.8688	Down	9.70958e-15	2.65576e-14
novel_mir624	46	0	1.87	0.001	-10.8688	Down	9.70958e-15	2.65291e-14
novel_mir4955	46	0	1.87	0.001	-10.8688	Down	9.70958e-15	2.65006e-14
novel_mir1466	46	0	1.87	0.001	-10.8688	Down	9.70958e-15	2.64721e-14
novel_mir5303	46	0	1.87	0.001	-10.8688	Down	9.70958e-15	2.64438e-14
novel_mir5971	46	0	1.87	0.001	-10.8688	Down	9.70958e-15	2.64155e-14
novel_mir3685	46	0	1.87	0.001	-10.8688	Down	9.70958e-15	2.63872e-14
novel_mir4791	45	0	1.83	0.001	-10.8376	Down	1.95772e-14	5.30338e-14
novel_mir1990	45	0	1.83	0.001	-10.8376	Down	1.95772e-14	5.29773e-14
novel_mir4344	45	0	1.83	0.001	-10.8376	Down	1.95772e-14	5.29209e-14
novel_mir4752	45	0	1.83	0.001	-10.8376	Down	1.95772e-14	5.28647e-14
novel_mir5609	45	0	1.83	0.001	-10.8376	Down	1.95772e-14	5.28086e-14
novel_mir4599	45	0	1.83	0.001	-10.8376	Down	1.95772e-14	5.27526e-14
novel_mir4970	45	0	1.83	0.001	-10.8376	Down	1.95772e-14	5.26967e-14
novel_mir1040	45	0	1.83	0.001	-10.8376	Down	1.95772e-14	5.26409e-14
novel_mir2202	45	0	1.83	0.001	-10.8376	Down	1.95772e-14	5.25853e-14
novel_mir3958	45	0	1.83	0.001	-10.8376	Down	1.95772e-14	5.25297e-14
novel_mir1696	45	0	1.83	0.001	-10.8376	Down	1.95772e-14	5.24743e-14
novel_mir984	45	0	1.83	0.001	-10.8376	Down	1.95772e-14	5.2419e-14
novel_mir1854	45	0	1.83	0.001	-10.8376	Down	1.95772e-14	5.23639e-14
novel_mir901	45	0	1.83	0.001	-10.8376	Down	1.95772e-14	5.23088e-14
novel_mir477	45	0	1.83	0.001	-10.8376	Down	1.95772e-14	5.22538e-14
novel_mir1334	45	0	1.83	0.001	-10.8376	Down	1.95772e-14	5.2199e-14
novel_mir1822	45	0	1.83	0.001	-10.8376	Down	1.95772e-14	5.21443e-14
novel_mir1659	45	0	1.83	0.001	-10.8376	Down	1.95772e-14	5.20897e-14
novel_mir2906	44	0	1.79	0.001	-10.8057	Down	3.9473e-14	1.04808e-13
novel_mir4350	44	0	1.79	0.001	-10.8057	Down	3.9473e-14	1.04698e-13
novel_mir3612	44	0	1.79	0.001	-10.8057	Down	3.9473e-14	1.04589e-13
novel_mir2100	44	0	1.79	0.001	-10.8057	Down	3.9473e-14	1.0448e-13
novel_mir1565	44	0	1.79	0.001	-10.8057	Down	3.9473e-14	1.04371e-13
novel_mir2990	44	0	1.79	0.001	-10.8057	Down	3.9473e-14	1.04263e-13
novel_mir4436	44	0	1.79	0.001	-10.8057	Down	3.9473e-14	1.04155e-13
novel_mir381	44	0	1.79	0.001	-10.8057	Down	3.9473e-14	1.04047e-13
novel_mir1873	44	0	1.79	0.001	-10.8057	Down	3.9473e-14	1.03939e-13
novel_mir5162	44	0	1.79	0.001	-10.8057	Down	3.9473e-14	1.03831e-13
novel_mir337	44	0	1.79	0.001	-10.8057	Down	3.9473e-14	1.03724e-13
novel_mir903	44	0	1.79	0.001	-10.8057	Down	3.9473e-14	1.03617e-13
novel_mir4596	44	0	1.79	0.001	-10.8057	Down	3.9473e-14	1.0351e-13
novel_mir4092	44	0	1.79	0.001	-10.8057	Down	3.9473e-14	1.03403e-13
novel_mir935	44	0	1.79	0.001	-10.8057	Down	3.9473e-14	1.03296e-13
novel_mir1679	43	0	1.75	0.001	-10.7731	Down	7.95884e-14	2.0742e-13
novel_mir743	43	0	1.75	0.001	-10.7731	Down	7.95884e-14	2.07207e-13
novel_mir3583	43	0	1.75	0.001	-10.7731	Down	7.95884e-14	2.06995e-13
novel_mir4726	43	0	1.75	0.001	-10.7731	Down	7.95884e-14	2.06783e-13
novel_mir894	43	0	1.75	0.001	-10.7731	Down	7.95884e-14	2.06572e-13
novel_mir3683	43	0	1.75	0.001	-10.7731	Down	7.95884e-14	2.06361e-13
novel_mir5453	43	0	1.75	0.001	-10.7731	Down	7.95884e-14	2.06151e-13
novel_mir2829	43	0	1.75	0.001	-10.7731	Down	7.95884e-14	2.05941e-13
mmu-miR-7052-3p	43	0	1.75	0.001	-10.7731	Down	7.95884e-14	2.05732e-13
novel_mir4554	43	0	1.75	0.001	-10.7731	Down	7.95884e-14	2.05522e-13
novel_mir2858	43	0	1.75	0.001	-10.7731	Down	7.95884e-14	2.05314e-13
novel_mir23	43	0	1.75	0.001	-10.7731	Down	7.95884e-14	2.05106e-13
novel_mir5044	43	0	1.75	0.001	-10.7731	Down	7.95884e-14	2.04898e-13
novel_mir426	43	0	1.75	0.001	-10.7731	Down	7.95884e-14	2.0469e-13
novel_mir1619	43	0	1.75	0.001	-10.7731	Down	7.95884e-14	2.04483e-13
novel_mir1008	43	0	1.75	0.001	-10.7731	Down	7.95884e-14	2.04277e-13
novel_mir1708	43	0	1.75	0.001	-10.7731	Down	7.95884e-14	2.04071e-13
novel_mir1290	43	0	1.75	0.001	-10.7731	Down	7.95884e-14	2.03865e-13
novel_mir185	43	0	1.75	0.001	-10.7731	Down	7.95884e-14	2.0366e-13
novel_mir3917	43	0	1.75	0.001	-10.7731	Down	7.95884e-14	2.03455e-13
novel_mir4441	42	0	1.71	0.001	-10.7398	Down	1.60472e-13	4.08168e-13
novel_mir3141	42	0	1.71	0.001	-10.7398	Down	1.60472e-13	4.07759e-13
novel_mir5986	42	0	1.71	0.001	-10.7398	Down	1.60472e-13	4.07352e-13
novel_mir637	42	0	1.71	0.001	-10.7398	Down	1.60472e-13	4.06945e-13
novel_mir5309	42	0	1.71	0.001	-10.7398	Down	1.60472e-13	4.0654e-13
novel_mir617	42	0	1.71	0.001	-10.7398	Down	1.60472e-13	4.06135e-13
novel_mir685	42	0	1.71	0.001	-10.7398	Down	1.60472e-13	4.05731e-13
novel_mir4377	42	0	1.71	0.001	-10.7398	Down	1.60472e-13	4.05327e-13
novel_mir2874	42	0	1.71	0.001	-10.7398	Down	1.60472e-13	4.04925e-13
novel_mir1644	42	0	1.71	0.001	-10.7398	Down	1.60472e-13	4.04523e-13
novel_mir5348	42	0	1.71	0.001	-10.7398	Down	1.60472e-13	4.04122e-13
novel_mir5145	42	0	1.71	0.001	-10.7398	Down	1.60472e-13	4.03722e-13
novel_mir334	42	0	1.71	0.001	-10.7398	Down	1.60472e-13	4.03323e-13
novel_mir4666	42	0	1.71	0.001	-10.7398	Down	1.60472e-13	4.02924e-13
novel_mir3746	42	0	1.71	0.001	-10.7398	Down	1.60472e-13	4.02527e-13
novel_mir824	42	0	1.71	0.001	-10.7398	Down	1.60472e-13	4.0213e-13
novel_mir950	42	0	1.71	0.001	-10.7398	Down	1.60472e-13	4.01733e-13
novel_mir5626	42	0	1.71	0.001	-10.7398	Down	1.60472e-13	4.01338e-13
novel_mir4297	42	0	1.71	0.001	-10.7398	Down	1.60472e-13	4.00943e-13
novel_mir3401	41	0	1.67	0.001	-10.7056	Down	3.23556e-13	8.06035e-13
novel_mir3752	41	0	1.67	0.001	-10.7056	Down	3.23556e-13	8.05246e-13
novel_mir659	41	0	1.67	0.001	-10.7056	Down	3.23556e-13	8.04458e-13
novel_mir2426	41	0	1.67	0.001	-10.7056	Down	3.23556e-13	8.03671e-13
novel_mir1230	41	0	1.67	0.001	-10.7056	Down	3.23556e-13	8.02887e-13
novel_mir2224	41	0	1.67	0.001	-10.7056	Down	3.23556e-13	8.02103e-13
novel_mir4803	41	0	1.67	0.001	-10.7056	Down	3.23556e-13	8.01321e-13
novel_mir3515	41	0	1.67	0.001	-10.7056	Down	3.23556e-13	8.00541e-13
novel_mir4203	41	0	1.67	0.001	-10.7056	Down	3.23556e-13	7.99762e-13
novel_mir284	41	0	1.67	0.001	-10.7056	Down	3.23556e-13	7.98985e-13
novel_mir2303	41	0	1.67	0.001	-10.7056	Down	3.23556e-13	7.9821e-13
novel_mir4730	41	0	1.67	0.001	-10.7056	Down	3.23556e-13	7.97435e-13
novel_mir2621	41	0	1.67	0.001	-10.7056	Down	3.23556e-13	7.96663e-13
novel_mir1456	41	0	1.67	0.001	-10.7056	Down	3.23556e-13	7.95891e-13
novel_mir3499	41	0	1.67	0.001	-10.7056	Down	3.23556e-13	7.95122e-13
novel_mir4555	41	0	1.67	0.001	-10.7056	Down	3.23556e-13	7.94353e-13
novel_mir4744	41	0	1.67	0.001	-10.7056	Down	3.23556e-13	7.93587e-13
novel_mir1389	41	0	1.67	0.001	-10.7056	Down	3.23556e-13	7.92821e-13
novel_mir3068	41	0	1.67	0.001	-10.7056	Down	3.23556e-13	7.92058e-13
novel_mir1787	41	0	1.67	0.001	-10.7056	Down	3.23556e-13	7.91295e-13
novel_mir3884	41	0	1.67	0.001	-10.7056	Down	3.23556e-13	7.90534e-13
novel_mir4755	41	0	1.67	0.001	-10.7056	Down	3.23556e-13	7.89775e-13
novel_mir323	40	0	1.63	0.001	-10.6707	Down	6.52376e-13	1.58327e-12
novel_mir2394	40	0	1.63	0.001	-10.6707	Down	6.52376e-13	1.58176e-12
novel_mir1206	40	0	1.63	0.001	-10.6707	Down	6.52376e-13	1.58025e-12
novel_mir5570	40	0	1.63	0.001	-10.6707	Down	6.52376e-13	1.57875e-12
novel_mir3682	40	0	1.63	0.001	-10.6707	Down	6.52376e-13	1.57725e-12
novel_mir4064	40	0	1.63	0.001	-10.6707	Down	6.52376e-13	1.57575e-12
novel_mir1841	40	0	1.63	0.001	-10.6707	Down	6.52376e-13	1.57425e-12
novel_mir2838	40	0	1.63	0.001	-10.6707	Down	6.52376e-13	1.57276e-12
novel_mir2208	40	0	1.63	0.001	-10.6707	Down	6.52376e-13	1.57127e-12
novel_mir1779	40	0	1.63	0.001	-10.6707	Down	6.52376e-13	1.56978e-12
mmu-miR-7091-3p	40	0	1.63	0.001	-10.6707	Down	6.52376e-13	1.56829e-12
novel_mir2712	40	0	1.63	0.001	-10.6707	Down	6.52376e-13	1.56681e-12
novel_mir4814	40	0	1.63	0.001	-10.6707	Down	6.52376e-13	1.56533e-12
novel_mir1077	40	0	1.63	0.001	-10.6707	Down	6.52376e-13	1.56386e-12
novel_mir4840	40	0	1.63	0.001	-10.6707	Down	6.52376e-13	1.56238e-12
novel_mir1302	40	0	1.63	0.001	-10.6707	Down	6.52376e-13	1.56091e-12
novel_mir4980	40	0	1.63	0.001	-10.6707	Down	6.52376e-13	1.55944e-12
novel_mir2516	40	0	1.63	0.001	-10.6707	Down	6.52376e-13	1.55798e-12
novel_mir3164	40	0	1.63	0.001	-10.6707	Down	6.52376e-13	1.55651e-12
novel_mir4984	40	0	1.63	0.001	-10.6707	Down	6.52376e-13	1.55505e-12
novel_mir304	40	0	1.63	0.001	-10.6707	Down	6.52376e-13	1.5536e-12
novel_mir3242	40	0	1.63	0.001	-10.6707	Down	6.52376e-13	1.55214e-12
novel_mir4773	40	0	1.63	0.001	-10.6707	Down	6.52376e-13	1.55069e-12
novel_mir503	40	0	1.63	0.001	-10.6707	Down	6.52376e-13	1.54924e-12
novel_mir3322	40	0	1.63	0.001	-10.6707	Down	6.52376e-13	1.54779e-12
novel_mir1947	39	0	1.59	0.001	-10.6348	Down	1.31537e-12	3.11206e-12
novel_mir134	39	0	1.59	0.001	-10.6348	Down	1.31537e-12	3.10917e-12
novel_mir6026	39	0	1.59	0.001	-10.6348	Down	1.31537e-12	3.10628e-12
novel_mir5500	39	0	1.59	0.001	-10.6348	Down	1.31537e-12	3.10339e-12
novel_mir1824	39	0	1.59	0.001	-10.6348	Down	1.31537e-12	3.10052e-12
novel_mir4087	39	0	1.59	0.001	-10.6348	Down	1.31537e-12	3.09764e-12
novel_mir4653	39	0	1.59	0.001	-10.6348	Down	1.31537e-12	3.09477e-12
novel_mir645	39	0	1.59	0.001	-10.6348	Down	1.31537e-12	3.09191e-12
novel_mir3754	39	0	1.59	0.001	-10.6348	Down	1.31537e-12	3.08905e-12
novel_mir1213	39	0	1.59	0.001	-10.6348	Down	1.31537e-12	3.0862e-12
novel_mir450	39	0	1.59	0.001	-10.6348	Down	1.31537e-12	3.08335e-12
novel_mir251	39	0	1.59	0.001	-10.6348	Down	1.31537e-12	3.08051e-12
novel_mir801	39	0	1.59	0.001	-10.6348	Down	1.31537e-12	3.07768e-12
novel_mir1871	39	0	1.59	0.001	-10.6348	Down	1.31537e-12	3.07484e-12
novel_mir137	39	0	1.59	0.001	-10.6348	Down	1.31537e-12	3.07202e-12
novel_mir3163	39	0	1.59	0.001	-10.6348	Down	1.31537e-12	3.0692e-12
novel_mir2050	39	0	1.59	0.001	-10.6348	Down	1.31537e-12	3.06638e-12
novel_mir3137	39	0	1.59	0.001	-10.6348	Down	1.31537e-12	3.06357e-12
novel_mir1977	39	0	1.59	0.001	-10.6348	Down	1.31537e-12	3.06076e-12
novel_mir2540	39	0	1.59	0.001	-10.6348	Down	1.31537e-12	3.05796e-12
novel_mir3648	39	0	1.59	0.001	-10.6348	Down	1.31537e-12	3.05517e-12
novel_mir5692	39	0	1.59	0.001	-10.6348	Down	1.31537e-12	3.05238e-12
novel_mir1652	39	0	1.59	0.001	-10.6348	Down	1.31537e-12	3.04959e-12
novel_mir4890	38	0	1.55	0.001	-10.5981	Down	2.65214e-12	6.12088e-12
novel_mir5698	38	0	1.55	0.001	-10.5981	Down	2.65214e-12	6.11532e-12
novel_mir3471	38	0	1.55	0.001	-10.5981	Down	2.65214e-12	6.10978e-12
novel_mir4868	38	0	1.55	0.001	-10.5981	Down	2.65214e-12	6.10425e-12
novel_mir5817	38	0	1.55	0.001	-10.5981	Down	2.65214e-12	6.09872e-12
novel_mir5780	38	0	1.55	0.001	-10.5981	Down	2.65214e-12	6.09321e-12
novel_mir3711	38	0	1.55	0.001	-10.5981	Down	2.65214e-12	6.0877e-12
novel_mir1477	38	0	1.55	0.001	-10.5981	Down	2.65214e-12	6.08221e-12
novel_mir5587	38	0	1.55	0.001	-10.5981	Down	2.65214e-12	6.07672e-12
novel_mir5659	38	0	1.55	0.001	-10.5981	Down	2.65214e-12	6.07125e-12
novel_mir2663	38	0	1.55	0.001	-10.5981	Down	2.65214e-12	6.06579e-12
novel_mir5192	38	0	1.55	0.001	-10.5981	Down	2.65214e-12	6.06033e-12
mmu-miR-335-5p	38	0	1.55	0.001	-10.5981	Down	2.65214e-12	6.05489e-12
novel_mir2053	38	0	1.55	0.001	-10.5981	Down	2.65214e-12	6.04945e-12
novel_mir3303	38	0	1.55	0.001	-10.5981	Down	2.65214e-12	6.04402e-12
novel_mir1001	38	0	1.55	0.001	-10.5981	Down	2.65214e-12	6.03861e-12
novel_mir1003	38	0	1.55	0.001	-10.5981	Down	2.65214e-12	6.0332e-12
novel_mir1861	38	0	1.55	0.001	-10.5981	Down	2.65214e-12	6.02781e-12
novel_mir3259	38	0	1.55	0.001	-10.5981	Down	2.65214e-12	6.02242e-12
novel_mir2711	38	0	1.55	0.001	-10.5981	Down	2.65214e-12	6.01704e-12
novel_mir1009	38	0	1.55	0.001	-10.5981	Down	2.65214e-12	6.01168e-12
novel_mir902	38	0	1.55	0.001	-10.5981	Down	2.65214e-12	6.00632e-12
novel_mir1078	38	0	1.55	0.001	-10.5981	Down	2.65214e-12	6.00097e-12
novel_mir3994	38	0	1.55	0.001	-10.5981	Down	2.65214e-12	5.99563e-12
novel_mir4375	38	0	1.55	0.001	-10.5981	Down	2.65214e-12	5.9903e-12
novel_mir155	38	0	1.55	0.001	-10.5981	Down	2.65214e-12	5.98498e-12
novel_mir5097	38	0	1.55	0.001	-10.5981	Down	2.65214e-12	5.97967e-12
novel_mir2920	38	0	1.55	0.001	-10.5981	Down	2.65214e-12	5.97437e-12
novel_mir191	38	0	1.55	0.001	-10.5981	Down	2.65214e-12	5.96908e-12
novel_mir4767	38	0	1.55	0.001	-10.5981	Down	2.65214e-12	5.96379e-12
novel_mir1890	38	0	1.55	0.001	-10.5981	Down	2.65214e-12	5.95852e-12
novel_mir2284	38	0	1.55	0.001	-10.5981	Down	2.65214e-12	5.95326e-12
novel_mir6069	38	0	1.55	0.001	-10.5981	Down	2.65214e-12	5.948e-12
novel_mir1288	38	0	1.55	0.001	-10.5981	Down	2.65214e-12	5.94276e-12
novel_mir5416	38	0	1.55	0.001	-10.5981	Down	2.65214e-12	5.93752e-12
novel_mir3893	38	0	1.55	0.001	-10.5981	Down	2.65214e-12	5.9323e-12
novel_mir2676	38	0	1.55	0.001	-10.5981	Down	2.65214e-12	5.92708e-12
novel_mir3690	38	0	1.55	0.001	-10.5981	Down	2.65214e-12	5.92187e-12
novel_mir4322	37	0	1.51	0.001	-10.5603	Down	5.34746e-12	1.18775e-11
novel_mir4453	37	0	1.51	0.001	-10.5603	Down	5.34746e-12	1.18672e-11
novel_mir2507	37	0	1.51	0.001	-10.5603	Down	5.34746e-12	1.18568e-11
novel_mir4429	37	0	1.51	0.001	-10.5603	Down	5.34746e-12	1.18465e-11
novel_mir1831	37	0	1.51	0.001	-10.5603	Down	5.34746e-12	1.18361e-11
novel_mir717	37	0	1.51	0.001	-10.5603	Down	5.34746e-12	1.18258e-11
novel_mir5016	37	0	1.51	0.001	-10.5603	Down	5.34746e-12	1.18156e-11
novel_mir442	37	0	1.51	0.001	-10.5603	Down	5.34746e-12	1.18053e-11
novel_mir2748	37	0	1.51	0.001	-10.5603	Down	5.34746e-12	1.1795e-11
novel_mir1373	37	0	1.51	0.001	-10.5603	Down	5.34746e-12	1.17848e-11
novel_mir2677	37	0	1.51	0.001	-10.5603	Down	5.34746e-12	1.17746e-11
novel_mir289	37	0	1.51	0.001	-10.5603	Down	5.34746e-12	1.17644e-11
novel_mir623	37	0	1.51	0.001	-10.5603	Down	5.34746e-12	1.17542e-11
novel_mir1738	37	0	1.51	0.001	-10.5603	Down	5.34746e-12	1.17441e-11
novel_mir3938	37	0	1.51	0.001	-10.5603	Down	5.34746e-12	1.17339e-11
novel_mir175	37	0	1.51	0.001	-10.5603	Down	5.34746e-12	1.17238e-11
novel_mir1514	37	0	1.51	0.001	-10.5603	Down	5.34746e-12	1.17137e-11
novel_mir2407	37	0	1.51	0.001	-10.5603	Down	5.34746e-12	1.17036e-11
novel_mir4573	37	0	1.51	0.001	-10.5603	Down	5.34746e-12	1.16935e-11
novel_mir4204	37	0	1.51	0.001	-10.5603	Down	5.34746e-12	1.16835e-11
novel_mir5115	37	0	1.51	0.001	-10.5603	Down	5.34746e-12	1.16735e-11
novel_mir5410	37	0	1.51	0.001	-10.5603	Down	5.34746e-12	1.16634e-11
novel_mir502	37	0	1.51	0.001	-10.5603	Down	5.34746e-12	1.16534e-11
novel_mir1301	37	0	1.51	0.001	-10.5603	Down	5.34746e-12	1.16434e-11
novel_mir4686	37	0	1.51	0.001	-10.5603	Down	5.34746e-12	1.16335e-11
novel_mir4144	37	0	1.51	0.001	-10.5603	Down	5.34746e-12	1.16235e-11
novel_mir3334	37	0	1.51	0.001	-10.5603	Down	5.34746e-12	1.16136e-11
novel_mir225	37	0	1.51	0.001	-10.5603	Down	5.34746e-12	1.16037e-11
novel_mir4807	37	0	1.51	0.001	-10.5603	Down	5.34746e-12	1.15938e-11
novel_mir1820	37	0	1.51	0.001	-10.5603	Down	5.34746e-12	1.15839e-11
novel_mir4489	37	0	1.51	0.001	-10.5603	Down	5.34746e-12	1.1574e-11
novel_mir3465	37	0	1.51	0.001	-10.5603	Down	5.34746e-12	1.15642e-11
novel_mir2080	37	0	1.51	0.001	-10.5603	Down	5.34746e-12	1.15543e-11
novel_mir1504	37	0	1.51	0.001	-10.5603	Down	5.34746e-12	1.15445e-11
novel_mir3486	36	0	1.47	0.001	-10.5216	Down	1.07819e-11	2.31197e-11
novel_mir47	36	0	1.47	0.001	-10.5216	Down	1.07819e-11	2.31002e-11
novel_mir5794	36	0	1.47	0.001	-10.5216	Down	1.07819e-11	2.30808e-11
novel_mir2212	36	0	1.47	0.001	-10.5216	Down	1.07819e-11	2.30613e-11
novel_mir3910	36	0	1.47	0.001	-10.5216	Down	1.07819e-11	2.30419e-11
novel_mir5514	36	0	1.47	0.001	-10.5216	Down	1.07819e-11	2.30226e-11
novel_mir918	36	0	1.47	0.001	-10.5216	Down	1.07819e-11	2.30032e-11
novel_mir3037	36	0	1.47	0.001	-10.5216	Down	1.07819e-11	2.29839e-11
novel_mir5223	36	0	1.47	0.001	-10.5216	Down	1.07819e-11	2.29647e-11
novel_mir3311	36	0	1.47	0.001	-10.5216	Down	1.07819e-11	2.29454e-11
novel_mir1495	36	0	1.47	0.001	-10.5216	Down	1.07819e-11	2.29262e-11
novel_mir2264	36	0	1.47	0.001	-10.5216	Down	1.07819e-11	2.29071e-11
novel_mir1088	36	0	1.47	0.001	-10.5216	Down	1.07819e-11	2.28879e-11
novel_mir143	36	0	1.47	0.001	-10.5216	Down	1.07819e-11	2.28688e-11
novel_mir4196	36	0	1.47	0.001	-10.5216	Down	1.07819e-11	2.28498e-11
novel_mir1324	36	0	1.47	0.001	-10.5216	Down	1.07819e-11	2.28307e-11
novel_mir1700	36	0	1.47	0.001	-10.5216	Down	1.07819e-11	2.28117e-11
novel_mir3447	36	0	1.47	0.001	-10.5216	Down	1.07819e-11	2.27927e-11
novel_mir5236	36	0	1.47	0.001	-10.5216	Down	1.07819e-11	2.27738e-11
novel_mir1065	36	0	1.47	0.001	-10.5216	Down	1.07819e-11	2.27549e-11
novel_mir5551	36	0	1.47	0.001	-10.5216	Down	1.07819e-11	2.2736e-11
mmu-miR-12192-5p	36	0	1.47	0.001	-10.5216	Down	1.07819e-11	2.27171e-11
novel_mir549	36	0	1.47	0.001	-10.5216	Down	1.07819e-11	2.26983e-11
novel_mir1958	36	0	1.47	0.001	-10.5216	Down	1.07819e-11	2.26795e-11
novel_mir457	36	0	1.47	0.001	-10.5216	Down	1.07819e-11	2.26608e-11
novel_mir5346	36	0	1.47	0.001	-10.5216	Down	1.07819e-11	2.2642e-11
novel_mir3123	36	0	1.47	0.001	-10.5216	Down	1.07819e-11	2.26233e-11
novel_mir6163	36	0	1.47	0.001	-10.5216	Down	1.07819e-11	2.26047e-11
novel_mir1209	36	0	1.47	0.001	-10.5216	Down	1.07819e-11	2.2586e-11
novel_mir4390	36	0	1.47	0.001	-10.5216	Down	1.07819e-11	2.25674e-11
novel_mir217	36	0	1.47	0.001	-10.5216	Down	1.07819e-11	2.25489e-11
novel_mir3475	36	0	1.47	0.001	-10.5216	Down	1.07819e-11	2.25303e-11
novel_mir2734	36	0	1.47	0.001	-10.5216	Down	1.07819e-11	2.25118e-11
novel_mir898	36	0	1.47	0.001	-10.5216	Down	1.07819e-11	2.24933e-11
novel_mir4728	36	0	1.47	0.001	-10.5216	Down	1.07819e-11	2.24749e-11
novel_mir1740	36	0	1.47	0.001	-10.5216	Down	1.07819e-11	2.24564e-11
novel_mir270	36	0	1.47	0.001	-10.5216	Down	1.07819e-11	2.2438e-11
novel_mir199	35	0	1.43	0.001	-10.4818	Down	2.17394e-11	4.51675e-11
novel_mir3935	35	0	1.43	0.001	-10.4818	Down	2.17394e-11	4.51306e-11
novel_mir3101	35	0	1.43	0.001	-10.4818	Down	2.17394e-11	4.50937e-11
novel_mir1221	35	0	1.43	0.001	-10.4818	Down	2.17394e-11	4.50569e-11
novel_mir5520	35	0	1.43	0.001	-10.4818	Down	2.17394e-11	4.50202e-11
novel_mir1540	35	0	1.43	0.001	-10.4818	Down	2.17394e-11	4.49836e-11
novel_mir5322	35	0	1.43	0.001	-10.4818	Down	2.17394e-11	4.4947e-11
novel_mir431	35	0	1.43	0.001	-10.4818	Down	2.17394e-11	4.49104e-11
novel_mir3530	35	0	1.43	0.001	-10.4818	Down	2.17394e-11	4.48739e-11
novel_mir5527	35	0	1.43	0.001	-10.4818	Down	2.17394e-11	4.48375e-11
novel_mir2922	35	0	1.43	0.001	-10.4818	Down	2.17394e-11	4.48011e-11
novel_mir2513	35	0	1.43	0.001	-10.4818	Down	2.17394e-11	4.47648e-11
novel_mir4846	35	0	1.43	0.001	-10.4818	Down	2.17394e-11	4.47286e-11
novel_mir821	35	0	1.43	0.001	-10.4818	Down	2.17394e-11	4.46924e-11
novel_mir3576	35	0	1.43	0.001	-10.4818	Down	2.17394e-11	4.46563e-11
novel_mir1047	35	0	1.43	0.001	-10.4818	Down	2.17394e-11	4.46202e-11
novel_mir5823	35	0	1.43	0.001	-10.4818	Down	2.17394e-11	4.45842e-11
novel_mir4168	35	0	1.43	0.001	-10.4818	Down	2.17394e-11	4.45482e-11
novel_mir934	35	0	1.43	0.001	-10.4818	Down	2.17394e-11	4.45123e-11
novel_mir5031	35	0	1.43	0.001	-10.4818	Down	2.17394e-11	4.44765e-11
novel_mir1519	35	0	1.43	0.001	-10.4818	Down	2.17394e-11	4.44407e-11
novel_mir278	35	0	1.43	0.001	-10.4818	Down	2.17394e-11	4.4405e-11
novel_mir3787	35	0	1.43	0.001	-10.4818	Down	2.17394e-11	4.43693e-11
novel_mir4058	35	0	1.43	0.001	-10.4818	Down	2.17394e-11	4.43337e-11
novel_mir627	35	0	1.43	0.001	-10.4818	Down	2.17394e-11	4.42982e-11
novel_mir2993	35	0	1.43	0.001	-10.4818	Down	2.17394e-11	4.42627e-11
novel_mir5080	35	0	1.43	0.001	-10.4818	Down	2.17394e-11	4.42272e-11
novel_mir1217	35	0	1.43	0.001	-10.4818	Down	2.17394e-11	4.41919e-11
novel_mir2182	35	0	1.43	0.001	-10.4818	Down	2.17394e-11	4.41565e-11
novel_mir3234	34	0	1.39	0.001	-10.4409	Down	4.38324e-11	8.84656e-11
novel_mir4831	34	0	1.39	0.001	-10.4409	Down	4.38324e-11	8.83953e-11
novel_mir5117	34	0	1.39	0.001	-10.4409	Down	4.38324e-11	8.83252e-11
novel_mir5282	34	0	1.39	0.001	-10.4409	Down	4.38324e-11	8.82553e-11
novel_mir2698	34	0	1.39	0.001	-10.4409	Down	4.38324e-11	8.81854e-11
novel_mir4967	34	0	1.39	0.001	-10.4409	Down	4.38324e-11	8.81156e-11
novel_mir361	34	0	1.39	0.001	-10.4409	Down	4.38324e-11	8.8046e-11
novel_mir3552	34	0	1.39	0.001	-10.4409	Down	4.38324e-11	8.79764e-11
mmu-miR-138-1-3p	34	0	1.39	0.001	-10.4409	Down	4.38324e-11	8.7907e-11
novel_mir5125	34	0	1.39	0.001	-10.4409	Down	4.38324e-11	8.78376e-11
novel_mir4273	34	0	1.39	0.001	-10.4409	Down	4.38324e-11	8.77684e-11
novel_mir1270	34	0	1.39	0.001	-10.4409	Down	4.38324e-11	8.76993e-11
novel_mir601	34	0	1.39	0.001	-10.4409	Down	4.38324e-11	8.76303e-11
novel_mir3861	34	0	1.39	0.001	-10.4409	Down	4.38324e-11	8.75614e-11
novel_mir2615	34	0	1.39	0.001	-10.4409	Down	4.38324e-11	8.74926e-11
novel_mir5464	34	0	1.39	0.001	-10.4409	Down	4.38324e-11	8.7424e-11
novel_mir5831	34	0	1.39	0.001	-10.4409	Down	4.38324e-11	8.73554e-11
novel_mir2851	34	0	1.39	0.001	-10.4409	Down	4.38324e-11	8.72869e-11
novel_mir648	34	0	1.39	0.001	-10.4409	Down	4.38324e-11	8.72186e-11
novel_mir2987	34	0	1.39	0.001	-10.4409	Down	4.38324e-11	8.71503e-11
novel_mir4312	34	0	1.39	0.001	-10.4409	Down	4.38324e-11	8.70822e-11
novel_mir1371	34	0	1.39	0.001	-10.4409	Down	4.38324e-11	8.70142e-11
novel_mir4199	34	0	1.39	0.001	-10.4409	Down	4.38324e-11	8.69462e-11
novel_mir1928	34	0	1.39	0.001	-10.4409	Down	4.38324e-11	8.68784e-11
novel_mir2234	34	0	1.39	0.001	-10.4409	Down	4.38324e-11	8.68107e-11
novel_mir5588	34	0	1.39	0.001	-10.4409	Down	4.38324e-11	8.67431e-11
novel_mir4320	34	0	1.39	0.001	-10.4409	Down	4.38324e-11	8.66756e-11
novel_mir4113	34	0	1.39	0.001	-10.4409	Down	4.38324e-11	8.66082e-11
novel_mir269	34	0	1.39	0.001	-10.4409	Down	4.38324e-11	8.65409e-11
novel_mir4356	34	0	1.39	0.001	-10.4409	Down	4.38324e-11	8.64737e-11
novel_mir4245	34	0	1.39	0.001	-10.4409	Down	4.38324e-11	8.64066e-11
novel_mir3172	33	0	1.34	0.001	-10.388	Down	8.83782e-11	1.73412e-10
novel_mir4703	33	0	1.34	0.001	-10.388	Down	8.83782e-11	1.73279e-10
novel_mir421	33	0	1.34	0.001	-10.388	Down	8.83782e-11	1.73145e-10
novel_mir5529	33	0	1.34	0.001	-10.388	Down	8.83782e-11	1.73012e-10
novel_mir4254	33	0	1.34	0.001	-10.388	Down	8.83782e-11	1.72878e-10
novel_mir3443	33	0	1.34	0.001	-10.388	Down	8.83782e-11	1.72745e-10
novel_mir1441	33	0	1.34	0.001	-10.388	Down	8.83782e-11	1.72613e-10
novel_mir3528	33	0	1.34	0.001	-10.388	Down	8.83782e-11	1.7248e-10
novel_mir1095	33	0	1.34	0.001	-10.388	Down	8.83782e-11	1.72348e-10
novel_mir3574	33	0	1.34	0.001	-10.388	Down	8.83782e-11	1.72215e-10
novel_mir2109	33	0	1.34	0.001	-10.388	Down	8.83782e-11	1.72084e-10
novel_mir590	33	0	1.34	0.001	-10.388	Down	8.83782e-11	1.71952e-10
novel_mir396	33	0	1.34	0.001	-10.388	Down	8.83782e-11	1.7182e-10
novel_mir3953	33	0	1.34	0.001	-10.388	Down	8.83782e-11	1.71689e-10
novel_mir5855	33	0	1.34	0.001	-10.388	Down	8.83782e-11	1.71558e-10
novel_mir6031	33	0	1.34	0.001	-10.388	Down	8.83782e-11	1.71427e-10
novel_mir6083	33	0	1.34	0.001	-10.388	Down	8.83782e-11	1.71296e-10
novel_mir3317	33	0	1.34	0.001	-10.388	Down	8.83782e-11	1.71165e-10
novel_mir4335	33	0	1.34	0.001	-10.388	Down	8.83782e-11	1.71035e-10
novel_mir3950	33	0	1.34	0.001	-10.388	Down	8.83782e-11	1.70905e-10
novel_mir3671	33	0	1.34	0.001	-10.388	Down	8.83782e-11	1.70775e-10
novel_mir5278	33	0	1.34	0.001	-10.388	Down	8.83782e-11	1.70645e-10
novel_mir3951	33	0	1.34	0.001	-10.388	Down	8.83782e-11	1.70516e-10
novel_mir1748	33	0	1.34	0.001	-10.388	Down	8.83782e-11	1.70386e-10
novel_mir3862	33	0	1.34	0.001	-10.388	Down	8.83782e-11	1.70257e-10
novel_mir253	33	0	1.34	0.001	-10.388	Down	8.83782e-11	1.70128e-10
novel_mir2228	33	0	1.34	0.001	-10.388	Down	8.83782e-11	1.69999e-10
novel_mir6028	33	0	1.34	0.001	-10.388	Down	8.83782e-11	1.69871e-10
novel_mir2231	33	0	1.34	0.001	-10.388	Down	8.83782e-11	1.69742e-10
novel_mir1135	33	0	1.34	0.001	-10.388	Down	8.83782e-11	1.69614e-10
novel_mir2260	33	0	1.34	0.001	-10.388	Down	8.83782e-11	1.69486e-10
novel_mir4408	33	0	1.34	0.001	-10.388	Down	8.83782e-11	1.69358e-10
novel_mir4706	33	0	1.34	0.001	-10.388	Down	8.83782e-11	1.69231e-10
novel_mir779	33	0	1.34	0.001	-10.388	Down	8.83782e-11	1.69103e-10
novel_mir1084	33	0	1.34	0.001	-10.388	Down	8.83782e-11	1.68976e-10
novel_mir3584	33	0	1.34	0.001	-10.388	Down	8.83782e-11	1.68849e-10
novel_mir6025	32	0	1.3	0.001	-10.3443	Down	1.78195e-10	3.38917e-10
novel_mir1374	32	0	1.3	0.001	-10.3443	Down	1.78195e-10	3.38663e-10
novel_mir3339	32	0	1.3	0.001	-10.3443	Down	1.78195e-10	3.3841e-10
novel_mir2560	32	0	1.3	0.001	-10.3443	Down	1.78195e-10	3.38157e-10
novel_mir1621	32	0	1.3	0.001	-10.3443	Down	1.78195e-10	3.37905e-10
novel_mir101	32	0	1.3	0.001	-10.3443	Down	1.78195e-10	3.37653e-10
novel_mir2460	32	0	1.3	0.001	-10.3443	Down	1.78195e-10	3.37401e-10
novel_mir3813	32	0	1.3	0.001	-10.3443	Down	1.78195e-10	3.3715e-10
novel_mir5749	32	0	1.3	0.001	-10.3443	Down	1.78195e-10	3.36899e-10
novel_mir4907	32	0	1.3	0.001	-10.3443	Down	1.78195e-10	3.36649e-10
novel_mir2428	32	0	1.3	0.001	-10.3443	Down	1.78195e-10	3.36399e-10
novel_mir761	32	0	1.3	0.001	-10.3443	Down	1.78195e-10	3.36149e-10
novel_mir2705	32	0	1.3	0.001	-10.3443	Down	1.78195e-10	3.35899e-10
novel_mir4218	32	0	1.3	0.001	-10.3443	Down	1.78195e-10	3.3565e-10
novel_mir1827	32	0	1.3	0.001	-10.3443	Down	1.78195e-10	3.35402e-10
novel_mir4361	32	0	1.3	0.001	-10.3443	Down	1.78195e-10	3.35154e-10
novel_mir2258	32	0	1.3	0.001	-10.3443	Down	1.78195e-10	3.34906e-10
novel_mir3120	32	0	1.3	0.001	-10.3443	Down	1.78195e-10	3.34658e-10
novel_mir1370	32	0	1.3	0.001	-10.3443	Down	1.78195e-10	3.34411e-10
novel_mir2773	32	0	1.3	0.001	-10.3443	Down	1.78195e-10	3.34164e-10
novel_mir5727	32	0	1.3	0.001	-10.3443	Down	1.78195e-10	3.33918e-10
novel_mir2593	32	0	1.3	0.001	-10.3443	Down	1.78195e-10	3.33672e-10
novel_mir2783	32	0	1.3	0.001	-10.3443	Down	1.78195e-10	3.33426e-10
novel_mir5004	32	0	1.3	0.001	-10.3443	Down	1.78195e-10	3.33181e-10
novel_mir4189	32	0	1.3	0.001	-10.3443	Down	1.78195e-10	3.32936e-10
novel_mir2527	32	0	1.3	0.001	-10.3443	Down	1.78195e-10	3.32691e-10
novel_mir1400	32	0	1.3	0.001	-10.3443	Down	1.78195e-10	3.32447e-10
novel_mir3789	32	0	1.3	0.001	-10.3443	Down	1.78195e-10	3.32203e-10
novel_mir1742	32	0	1.3	0.001	-10.3443	Down	1.78195e-10	3.31959e-10
novel_mir3908	32	0	1.3	0.001	-10.3443	Down	1.78195e-10	3.31716e-10
novel_mir3786	32	0	1.3	0.001	-10.3443	Down	1.78195e-10	3.31473e-10
novel_mir3931	32	0	1.3	0.001	-10.3443	Down	1.78195e-10	3.31231e-10
novel_mir2545	32	0	1.3	0.001	-10.3443	Down	1.78195e-10	3.30989e-10
novel_mir5911	32	0	1.3	0.001	-10.3443	Down	1.78195e-10	3.30747e-10
novel_mir2358	32	0	1.3	0.001	-10.3443	Down	1.78195e-10	3.30505e-10
novel_mir5641	32	0	1.3	0.001	-10.3443	Down	1.78195e-10	3.30264e-10
novel_mir2433	32	0	1.3	0.001	-10.3443	Down	1.78195e-10	3.30024e-10
novel_mir131	32	0	1.3	0.001	-10.3443	Down	1.78195e-10	3.29783e-10
novel_mir1846	32	0	1.3	0.001	-10.3443	Down	1.78195e-10	3.29543e-10
mmu-miR-16-2-3p	32	0	1.3	0.001	-10.3443	Down	1.78195e-10	3.29304e-10
novel_mir2555	31	0	1.26	0.001	-10.2992	Down	3.5929e-10	6.60127e-10
novel_mir5330	31	0	1.26	0.001	-10.2992	Down	3.5929e-10	6.5965e-10
novel_mir2222	31	0	1.26	0.001	-10.2992	Down	3.5929e-10	6.59174e-10
novel_mir1691	31	0	1.26	0.001	-10.2992	Down	3.5929e-10	6.58698e-10
novel_mir205	31	0	1.26	0.001	-10.2992	Down	3.5929e-10	6.58223e-10
novel_mir816	31	0	1.26	0.001	-10.2992	Down	3.5929e-10	6.57749e-10
novel_mir5887	31	0	1.26	0.001	-10.2992	Down	3.5929e-10	6.57276e-10
novel_mir1463	31	0	1.26	0.001	-10.2992	Down	3.5929e-10	6.56803e-10
novel_mir877	31	0	1.26	0.001	-10.2992	Down	3.5929e-10	6.56331e-10
novel_mir2443	31	0	1.26	0.001	-10.2992	Down	3.5929e-10	6.55859e-10
novel_mir1903	31	0	1.26	0.001	-10.2992	Down	3.5929e-10	6.55388e-10
novel_mir3491	31	0	1.26	0.001	-10.2992	Down	3.5929e-10	6.54918e-10
novel_mir742	31	0	1.26	0.001	-10.2992	Down	3.5929e-10	6.54449e-10
novel_mir1229	31	0	1.26	0.001	-10.2992	Down	3.5929e-10	6.5398e-10
novel_mir1357	31	0	1.26	0.001	-10.2992	Down	3.5929e-10	6.53512e-10
novel_mir1168	31	0	1.26	0.001	-10.2992	Down	3.5929e-10	6.53044e-10
mmu-miR-195a-5p	31	0	1.26	0.001	-10.2992	Down	3.5929e-10	6.52577e-10
novel_mir4345	31	0	1.26	0.001	-10.2992	Down	3.5929e-10	6.52111e-10
novel_mir5746	31	0	1.26	0.001	-10.2992	Down	3.5929e-10	6.51646e-10
novel_mir866	31	0	1.26	0.001	-10.2992	Down	3.5929e-10	6.51181e-10
mmu-miR-709	31	0	1.26	0.001	-10.2992	Down	3.5929e-10	6.50717e-10
novel_mir5713	31	0	1.26	0.001	-10.2992	Down	3.5929e-10	6.50253e-10
novel_mir3700	31	0	1.26	0.001	-10.2992	Down	3.5929e-10	6.49791e-10
novel_mir987	31	0	1.26	0.001	-10.2992	Down	3.5929e-10	6.49329e-10
novel_mir1249	31	0	1.26	0.001	-10.2992	Down	3.5929e-10	6.48867e-10
novel_mir2330	31	0	1.26	0.001	-10.2992	Down	3.5929e-10	6.48406e-10
novel_mir4828	31	0	1.26	0.001	-10.2992	Down	3.5929e-10	6.47946e-10
novel_mir353	31	0	1.26	0.001	-10.2992	Down	3.5929e-10	6.47486e-10
novel_mir3078	31	0	1.26	0.001	-10.2992	Down	3.5929e-10	6.47028e-10
novel_mir2946	31	0	1.26	0.001	-10.2992	Down	3.5929e-10	6.46569e-10
novel_mir1073	31	0	1.26	0.001	-10.2992	Down	3.5929e-10	6.46112e-10
novel_mir1517	31	0	1.26	0.001	-10.2992	Down	3.5929e-10	6.45655e-10
novel_mir2562	31	0	1.26	0.001	-10.2992	Down	3.5929e-10	6.45199e-10
novel_mir599	31	0	1.26	0.001	-10.2992	Down	3.5929e-10	6.44743e-10
novel_mir2720	30	0	1.22	0.001	-10.2527	Down	7.24426e-10	1.29631e-09
novel_mir4073	30	0	1.22	0.001	-10.2527	Down	7.24426e-10	1.2954e-09
novel_mir1924	30	0	1.22	0.001	-10.2527	Down	7.24426e-10	1.29449e-09
novel_mir712	30	0	1.22	0.001	-10.2527	Down	7.24426e-10	1.29358e-09
novel_mir2422	30	0	1.22	0.001	-10.2527	Down	7.24426e-10	1.29267e-09
novel_mir1275	30	0	1.22	0.001	-10.2527	Down	7.24426e-10	1.29177e-09
novel_mir4838	30	0	1.22	0.001	-10.2527	Down	7.24426e-10	1.29086e-09
novel_mir206	30	0	1.22	0.001	-10.2527	Down	7.24426e-10	1.28996e-09
novel_mir3705	30	0	1.22	0.001	-10.2527	Down	7.24426e-10	1.28905e-09
novel_mir3329	30	0	1.22	0.001	-10.2527	Down	7.24426e-10	1.28815e-09
novel_mir3159	30	0	1.22	0.001	-10.2527	Down	7.24426e-10	1.28725e-09
novel_mir5906	30	0	1.22	0.001	-10.2527	Down	7.24426e-10	1.28635e-09
novel_mir887	30	0	1.22	0.001	-10.2527	Down	7.24426e-10	1.28545e-09
novel_mir4982	30	0	1.22	0.001	-10.2527	Down	7.24426e-10	1.28455e-09
novel_mir1791	30	0	1.22	0.001	-10.2527	Down	7.24426e-10	1.28366e-09
novel_mir1574	30	0	1.22	0.001	-10.2527	Down	7.24426e-10	1.28276e-09
novel_mir1050	30	0	1.22	0.001	-10.2527	Down	7.24426e-10	1.28187e-09
novel_mir4292	30	0	1.22	0.001	-10.2527	Down	7.24426e-10	1.28098e-09
novel_mir1884	30	0	1.22	0.001	-10.2527	Down	7.24426e-10	1.28009e-09
novel_mir2637	30	0	1.22	0.001	-10.2527	Down	7.24426e-10	1.2792e-09
novel_mir3566	30	0	1.22	0.001	-10.2527	Down	7.24426e-10	1.27831e-09
novel_mir735	30	0	1.22	0.001	-10.2527	Down	7.24426e-10	1.27742e-09
novel_mir90	30	0	1.22	0.001	-10.2527	Down	7.24426e-10	1.27654e-09
novel_mir1862	30	0	1.22	0.001	-10.2527	Down	7.24426e-10	1.27565e-09
novel_mir3508	30	0	1.22	0.001	-10.2527	Down	7.24426e-10	1.27477e-09
novel_mir4521	30	0	1.22	0.001	-10.2527	Down	7.24426e-10	1.27389e-09
novel_mir3318	30	0	1.22	0.001	-10.2527	Down	7.24426e-10	1.27301e-09
novel_mir5886	30	0	1.22	0.001	-10.2527	Down	7.24426e-10	1.27213e-09
novel_mir4692	30	0	1.22	0.001	-10.2527	Down	7.24426e-10	1.27125e-09
novel_mir1783	30	0	1.22	0.001	-10.2527	Down	7.24426e-10	1.27037e-09
novel_mir4327	30	0	1.22	0.001	-10.2527	Down	7.24426e-10	1.26949e-09
novel_mir4894	30	0	1.22	0.001	-10.2527	Down	7.24426e-10	1.26862e-09
novel_mir2032	30	0	1.22	0.001	-10.2527	Down	7.24426e-10	1.26775e-09
novel_mir2334	30	0	1.22	0.001	-10.2527	Down	7.24426e-10	1.26687e-09
novel_mir864	30	0	1.22	0.001	-10.2527	Down	7.24426e-10	1.266e-09
novel_mir5344	30	0	1.22	0.001	-10.2527	Down	7.24426e-10	1.26513e-09
novel_mir1638	30	0	1.22	0.001	-10.2527	Down	7.24426e-10	1.26426e-09
novel_mir4912	30	0	1.22	0.001	-10.2527	Down	7.24426e-10	1.26339e-09
novel_mir4321	30	0	1.22	0.001	-10.2527	Down	7.24426e-10	1.26253e-09
novel_mir1408	30	0	1.22	0.001	-10.2527	Down	7.24426e-10	1.26166e-09
novel_mir2548	30	0	1.22	0.001	-10.2527	Down	7.24426e-10	1.2608e-09
novel_mir4549	30	0	1.22	0.001	-10.2527	Down	7.24426e-10	1.25994e-09
novel_mir2377	30	0	1.22	0.001	-10.2527	Down	7.24426e-10	1.25907e-09
novel_mir2315	30	0	1.22	0.001	-10.2527	Down	7.24426e-10	1.25821e-09
novel_mir2279	30	0	1.22	0.001	-10.2527	Down	7.24426e-10	1.25735e-09
novel_mir1369	29	0	1.18	0.001	-10.2046	Down	1.46064e-09	2.52482e-09
novel_mir5007	29	0	1.18	0.001	-10.2046	Down	1.46064e-09	2.5231e-09
novel_mir1286	29	0	1.18	0.001	-10.2046	Down	1.46064e-09	2.52139e-09
novel_mir2145	29	0	1.18	0.001	-10.2046	Down	1.46064e-09	2.51968e-09
novel_mir4216	29	0	1.18	0.001	-10.2046	Down	1.46064e-09	2.51797e-09
novel_mir5693	29	0	1.18	0.001	-10.2046	Down	1.46064e-09	2.51626e-09
novel_mir3698	29	0	1.18	0.001	-10.2046	Down	1.46064e-09	2.51456e-09
novel_mir2243	29	0	1.18	0.001	-10.2046	Down	1.46064e-09	2.51285e-09
novel_mir454	29	0	1.18	0.001	-10.2046	Down	1.46064e-09	2.51115e-09
novel_mir2501	29	0	1.18	0.001	-10.2046	Down	1.46064e-09	2.50946e-09
novel_mir2155	29	0	1.18	0.001	-10.2046	Down	1.46064e-09	2.50776e-09
mmu-miR-6953-3p	29	0	1.18	0.001	-10.2046	Down	1.46064e-09	2.50607e-09
novel_mir791	29	0	1.18	0.001	-10.2046	Down	1.46064e-09	2.50438e-09
novel_mir775	29	0	1.18	0.001	-10.2046	Down	1.46064e-09	2.50269e-09
novel_mir4163	29	0	1.18	0.001	-10.2046	Down	1.46064e-09	2.501e-09
novel_mir2530	29	0	1.18	0.001	-10.2046	Down	1.46064e-09	2.49932e-09
novel_mir4223	29	0	1.18	0.001	-10.2046	Down	1.46064e-09	2.49764e-09
novel_mir2129	29	0	1.18	0.001	-10.2046	Down	1.46064e-09	2.49596e-09
novel_mir2273	29	0	1.18	0.001	-10.2046	Down	1.46064e-09	2.49428e-09
novel_mir5227	29	0	1.18	0.001	-10.2046	Down	1.46064e-09	2.4926e-09
novel_mir509	29	0	1.18	0.001	-10.2046	Down	1.46064e-09	2.49093e-09
novel_mir2915	29	0	1.18	0.001	-10.2046	Down	1.46064e-09	2.48926e-09
novel_mir5916	29	0	1.18	0.001	-10.2046	Down	1.46064e-09	2.48759e-09
novel_mir2112	29	0	1.18	0.001	-10.2046	Down	1.46064e-09	2.48593e-09
novel_mir3852	29	0	1.18	0.001	-10.2046	Down	1.46064e-09	2.48426e-09
novel_mir1250	29	0	1.18	0.001	-10.2046	Down	1.46064e-09	2.4826e-09
novel_mir926	29	0	1.18	0.001	-10.2046	Down	1.46064e-09	2.48094e-09
novel_mir5597	29	0	1.18	0.001	-10.2046	Down	1.46064e-09	2.47928e-09
novel_mir1066	29	0	1.18	0.001	-10.2046	Down	1.46064e-09	2.47763e-09
novel_mir1778	29	0	1.18	0.001	-10.2046	Down	1.46064e-09	2.47597e-09
novel_mir409	29	0	1.18	0.001	-10.2046	Down	1.46064e-09	2.47432e-09
novel_mir3611	29	0	1.18	0.001	-10.2046	Down	1.46064e-09	2.47268e-09
novel_mir5341	29	0	1.18	0.001	-10.2046	Down	1.46064e-09	2.47103e-09
novel_mir2310	29	0	1.18	0.001	-10.2046	Down	1.46064e-09	2.46939e-09
novel_mir3222	29	0	1.18	0.001	-10.2046	Down	1.46064e-09	2.46774e-09
novel_mir1993	29	0	1.18	0.001	-10.2046	Down	1.46064e-09	2.4661e-09
novel_mir2575	29	0	1.18	0.001	-10.2046	Down	1.46064e-09	2.46447e-09
novel_mir5	29	0	1.18	0.001	-10.2046	Down	1.46064e-09	2.46283e-09
novel_mir2852	29	0	1.18	0.001	-10.2046	Down	1.46064e-09	2.4612e-09
novel_mir4656	29	0	1.18	0.001	-10.2046	Down	1.46064e-09	2.45957e-09
novel_mir4371	29	0	1.18	0.001	-10.2046	Down	1.46064e-09	2.45794e-09
mmu-miR-19a-3p	29	0	1.18	0.001	-10.2046	Down	1.46064e-09	2.45631e-09
novel_mir146	29	0	1.18	0.001	-10.2046	Down	1.46064e-09	2.45469e-09
novel_mir2464	29	0	1.18	0.001	-10.2046	Down	1.46064e-09	2.45306e-09
novel_mir4771	29	0	1.18	0.001	-10.2046	Down	1.46064e-09	2.45144e-09
novel_mir4027	29	0	1.18	0.001	-10.2046	Down	1.46064e-09	2.44983e-09
novel_mir4209	29	0	1.18	0.001	-10.2046	Down	1.46064e-09	2.44821e-09
novel_mir4488	29	0	1.18	0.001	-10.2046	Down	1.46064e-09	2.4466e-09
novel_mir1482	29	0	1.18	0.001	-10.2046	Down	1.46064e-09	2.44498e-09
novel_mir3996	29	0	1.18	0.001	-10.2046	Down	1.46064e-09	2.44337e-09
novel_mir2147	29	0	1.18	0.001	-10.2046	Down	1.46064e-09	2.44177e-09
novel_mir4660	29	0	1.18	0.001	-10.2046	Down	1.46064e-09	2.44016e-09
novel_mir3721	29	0	1.18	0.001	-10.2046	Down	1.46064e-09	2.43856e-09
novel_mir310	28	0	1.14	0.001	-10.1548	Down	2.94506e-09	4.90072e-09
novel_mir5310	28	0	1.14	0.001	-10.1548	Down	2.94506e-09	4.89751e-09
novel_mir1987	28	0	1.14	0.001	-10.1548	Down	2.94506e-09	4.89431e-09
novel_mir4759	28	0	1.14	0.001	-10.1548	Down	2.94506e-09	4.89111e-09
novel_mir1255	28	0	1.14	0.001	-10.1548	Down	2.94506e-09	4.88791e-09
novel_mir1133	28	0	1.14	0.001	-10.1548	Down	2.94506e-09	4.88472e-09
novel_mir2124	28	0	1.14	0.001	-10.1548	Down	2.94506e-09	4.88154e-09
novel_mir2452	28	0	1.14	0.001	-10.1548	Down	2.94506e-09	4.87836e-09
novel_mir5678	28	0	1.14	0.001	-10.1548	Down	2.94506e-09	4.87518e-09
novel_mir3262	28	0	1.14	0.001	-10.1548	Down	2.94506e-09	4.872e-09
novel_mir2223	28	0	1.14	0.001	-10.1548	Down	2.94506e-09	4.86883e-09
novel_mir3337	28	0	1.14	0.001	-10.1548	Down	2.94506e-09	4.86567e-09
novel_mir213	28	0	1.14	0.001	-10.1548	Down	2.94506e-09	4.86251e-09
novel_mir2577	28	0	1.14	0.001	-10.1548	Down	2.94506e-09	4.85935e-09
novel_mir321	28	0	1.14	0.001	-10.1548	Down	2.94506e-09	4.8562e-09
novel_mir602	28	0	1.14	0.001	-10.1548	Down	2.94506e-09	4.85305e-09
novel_mir4114	28	0	1.14	0.001	-10.1548	Down	2.94506e-09	4.8499e-09
novel_mir1985	28	0	1.14	0.001	-10.1548	Down	2.94506e-09	4.84676e-09
novel_mir157	28	0	1.14	0.001	-10.1548	Down	2.94506e-09	4.84362e-09
novel_mir2868	28	0	1.14	0.001	-10.1548	Down	2.94506e-09	4.84049e-09
novel_mir3689	28	0	1.14	0.001	-10.1548	Down	2.94506e-09	4.83736e-09
novel_mir238	28	0	1.14	0.001	-10.1548	Down	2.94506e-09	4.83424e-09
novel_mir1995	28	0	1.14	0.001	-10.1548	Down	2.94506e-09	4.83112e-09
novel_mir1795	28	0	1.14	0.001	-10.1548	Down	2.94506e-09	4.828e-09
novel_mir655	28	0	1.14	0.001	-10.1548	Down	2.94506e-09	4.82489e-09
novel_mir1583	28	0	1.14	0.001	-10.1548	Down	2.94506e-09	4.82178e-09
novel_mir3340	28	0	1.14	0.001	-10.1548	Down	2.94506e-09	4.81867e-09
novel_mir4229	28	0	1.14	0.001	-10.1548	Down	2.94506e-09	4.81557e-09
novel_mir969	28	0	1.14	0.001	-10.1548	Down	2.94506e-09	4.81247e-09
novel_mir2392	28	0	1.14	0.001	-10.1548	Down	2.94506e-09	4.80938e-09
novel_mir1131	28	0	1.14	0.001	-10.1548	Down	2.94506e-09	4.80629e-09
novel_mir443	28	0	1.14	0.001	-10.1548	Down	2.94506e-09	4.80321e-09
novel_mir21	28	0	1.14	0.001	-10.1548	Down	2.94506e-09	4.80013e-09
novel_mir5325	28	0	1.14	0.001	-10.1548	Down	2.94506e-09	4.79705e-09
novel_mir5646	28	0	1.14	0.001	-10.1548	Down	2.94506e-09	4.79398e-09
novel_mir2015	28	0	1.14	0.001	-10.1548	Down	2.94506e-09	4.79091e-09
novel_mir4632	28	0	1.14	0.001	-10.1548	Down	2.94506e-09	4.78784e-09
novel_mir5027	27	0	1.1	0.001	-10.1033	Down	5.93804e-09	9.62895e-09
novel_mir1266	27	0	1.1	0.001	-10.1033	Down	5.93804e-09	9.62281e-09
novel_mir5062	27	0	1.1	0.001	-10.1033	Down	5.93804e-09	9.61667e-09
novel_mir1773	27	0	1.1	0.001	-10.1033	Down	5.93804e-09	9.61055e-09
novel_mir487	27	0	1.1	0.001	-10.1033	Down	5.93804e-09	9.60443e-09
novel_mir3766	27	0	1.1	0.001	-10.1033	Down	5.93804e-09	9.59832e-09
novel_mir2265	27	0	1.1	0.001	-10.1033	Down	5.93804e-09	9.59222e-09
novel_mir2068	27	0	1.1	0.001	-10.1033	Down	5.93804e-09	9.58612e-09
novel_mir4582	27	0	1.1	0.001	-10.1033	Down	5.93804e-09	9.58004e-09
novel_mir2558	27	0	1.1	0.001	-10.1033	Down	5.93804e-09	9.57396e-09
novel_mir1576	27	0	1.1	0.001	-10.1033	Down	5.93804e-09	9.56789e-09
novel_mir1253	27	0	1.1	0.001	-10.1033	Down	5.93804e-09	9.56182e-09
novel_mir366	27	0	1.1	0.001	-10.1033	Down	5.93804e-09	9.55577e-09
novel_mir3409	27	0	1.1	0.001	-10.1033	Down	5.93804e-09	9.54972e-09
novel_mir2135	27	0	1.1	0.001	-10.1033	Down	5.93804e-09	9.54368e-09
novel_mir3388	27	0	1.1	0.001	-10.1033	Down	5.93804e-09	9.53765e-09
novel_mir3538	27	0	1.1	0.001	-10.1033	Down	5.93804e-09	9.53162e-09
novel_mir2167	27	0	1.1	0.001	-10.1033	Down	5.93804e-09	9.52561e-09
novel_mir2110	27	0	1.1	0.001	-10.1033	Down	5.93804e-09	9.5196e-09
novel_mir283	27	0	1.1	0.001	-10.1033	Down	5.93804e-09	9.51359e-09
novel_mir89	27	0	1.1	0.001	-10.1033	Down	5.93804e-09	9.5076e-09
novel_mir4514	27	0	1.1	0.001	-10.1033	Down	5.93804e-09	9.50161e-09
novel_mir3726	27	0	1.1	0.001	-10.1033	Down	5.93804e-09	9.49563e-09
novel_mir2001	27	0	1.1	0.001	-10.1033	Down	5.93804e-09	9.48966e-09
novel_mir4973	27	0	1.1	0.001	-10.1033	Down	5.93804e-09	9.4837e-09
novel_mir4400	27	0	1.1	0.001	-10.1033	Down	5.93804e-09	9.47774e-09
novel_mir1509	27	0	1.1	0.001	-10.1033	Down	5.93804e-09	9.47179e-09
novel_mir4855	27	0	1.1	0.001	-10.1033	Down	5.93804e-09	9.46585e-09
novel_mir970	27	0	1.1	0.001	-10.1033	Down	5.93804e-09	9.45991e-09
novel_mir719	27	0	1.1	0.001	-10.1033	Down	5.93804e-09	9.45398e-09
novel_mir1451	27	0	1.1	0.001	-10.1033	Down	5.93804e-09	9.44806e-09
novel_mir3316	27	0	1.1	0.001	-10.1033	Down	5.93804e-09	9.44215e-09
novel_mir4111	27	0	1.1	0.001	-10.1033	Down	5.93804e-09	9.43625e-09
novel_mir1237	27	0	1.1	0.001	-10.1033	Down	5.93804e-09	9.43035e-09
novel_mir4991	27	0	1.1	0.001	-10.1033	Down	5.93804e-09	9.42446e-09
novel_mir4680	27	0	1.1	0.001	-10.1033	Down	5.93804e-09	9.41858e-09
novel_mir1518	27	0	1.1	0.001	-10.1033	Down	5.93804e-09	9.4127e-09
novel_mir1472	27	0	1.1	0.001	-10.1033	Down	5.93804e-09	9.40683e-09
novel_mir5761	27	0	1.1	0.001	-10.1033	Down	5.93804e-09	9.40097e-09
novel_mir3604	27	0	1.1	0.001	-10.1033	Down	5.93804e-09	9.39512e-09
novel_mir2376	27	0	1.1	0.001	-10.1033	Down	5.93804e-09	9.38927e-09
novel_mir1130	27	0	1.1	0.001	-10.1033	Down	5.93804e-09	9.38343e-09
novel_mir5053	27	0	1.1	0.001	-10.1033	Down	5.93804e-09	9.3776e-09
novel_mir540	27	0	1.1	0.001	-10.1033	Down	5.93804e-09	9.37178e-09
novel_mir4975	27	0	1.1	0.001	-10.1033	Down	5.93804e-09	9.36596e-09
novel_mir4386	26	0	1.06	0.001	-10.0498	Down	1.19727e-08	1.88259e-08
novel_mir2717	26	0	1.06	0.001	-10.0498	Down	1.19727e-08	1.88142e-08
novel_mir158	26	0	1.06	0.001	-10.0498	Down	1.19727e-08	1.88026e-08
novel_mir751	26	0	1.06	0.001	-10.0498	Down	1.19727e-08	1.8791e-08
novel_mir168	26	0	1.06	0.001	-10.0498	Down	1.19727e-08	1.87794e-08
novel_mir4520	26	0	1.06	0.001	-10.0498	Down	1.19727e-08	1.87678e-08
novel_mir963	26	0	1.06	0.001	-10.0498	Down	1.19727e-08	1.87562e-08
novel_mir5845	26	0	1.06	0.001	-10.0498	Down	1.19727e-08	1.87447e-08
novel_mir930	26	0	1.06	0.001	-10.0498	Down	1.19727e-08	1.87331e-08
novel_mir1793	26	0	1.06	0.001	-10.0498	Down	1.19727e-08	1.87216e-08
novel_mir2043	26	0	1.06	0.001	-10.0498	Down	1.19727e-08	1.87101e-08
novel_mir5688	26	0	1.06	0.001	-10.0498	Down	1.19727e-08	1.86986e-08
novel_mir5943	26	0	1.06	0.001	-10.0498	Down	1.19727e-08	1.86871e-08
mmu-miR-7051-5p	26	0	1.06	0.001	-10.0498	Down	1.19727e-08	1.86756e-08
novel_mir1850	26	0	1.06	0.001	-10.0498	Down	1.19727e-08	1.86642e-08
novel_mir116	26	0	1.06	0.001	-10.0498	Down	1.19727e-08	1.86527e-08
novel_mir5654	26	0	1.06	0.001	-10.0498	Down	1.19727e-08	1.86413e-08
novel_mir4076	26	0	1.06	0.001	-10.0498	Down	1.19727e-08	1.86299e-08
novel_mir5706	26	0	1.06	0.001	-10.0498	Down	1.19727e-08	1.86185e-08
novel_mir4641	26	0	1.06	0.001	-10.0498	Down	1.19727e-08	1.86071e-08
novel_mir4568	26	0	1.06	0.001	-10.0498	Down	1.19727e-08	1.85957e-08
novel_mir959	26	0	1.06	0.001	-10.0498	Down	1.19727e-08	1.85844e-08
novel_mir3642	26	0	1.06	0.001	-10.0498	Down	1.19727e-08	1.8573e-08
novel_mir5525	26	0	1.06	0.001	-10.0498	Down	1.19727e-08	1.85617e-08
novel_mir4882	26	0	1.06	0.001	-10.0498	Down	1.19727e-08	1.85504e-08
novel_mir479	26	0	1.06	0.001	-10.0498	Down	1.19727e-08	1.85391e-08
novel_mir1414	26	0	1.06	0.001	-10.0498	Down	1.19727e-08	1.85278e-08
novel_mir2064	26	0	1.06	0.001	-10.0498	Down	1.19727e-08	1.85165e-08
novel_mir332	26	0	1.06	0.001	-10.0498	Down	1.19727e-08	1.85052e-08
novel_mir435	26	0	1.06	0.001	-10.0498	Down	1.19727e-08	1.8494e-08
novel_mir446	26	0	1.06	0.001	-10.0498	Down	1.19727e-08	1.84828e-08
novel_mir1018	26	0	1.06	0.001	-10.0498	Down	1.19727e-08	1.84715e-08
novel_mir4466	26	0	1.06	0.001	-10.0498	Down	1.19727e-08	1.84603e-08
novel_mir113	26	0	1.06	0.001	-10.0498	Down	1.19727e-08	1.84491e-08
novel_mir1637	26	0	1.06	0.001	-10.0498	Down	1.19727e-08	1.8438e-08
novel_mir358	26	0	1.06	0.001	-10.0498	Down	1.19727e-08	1.84268e-08
novel_mir551	26	0	1.06	0.001	-10.0498	Down	1.19727e-08	1.84156e-08
novel_mir1981	26	0	1.06	0.001	-10.0498	Down	1.19727e-08	1.84045e-08
novel_mir1485	26	0	1.06	0.001	-10.0498	Down	1.19727e-08	1.83934e-08
novel_mir4271	26	0	1.06	0.001	-10.0498	Down	1.19727e-08	1.83823e-08
novel_mir4885	26	0	1.06	0.001	-10.0498	Down	1.19727e-08	1.83712e-08
novel_mir6029	26	0	1.06	0.001	-10.0498	Down	1.19727e-08	1.83601e-08
novel_mir74	26	0	1.06	0.001	-10.0498	Down	1.19727e-08	1.8349e-08
novel_mir4303	26	0	1.06	0.001	-10.0498	Down	1.19727e-08	1.83379e-08
novel_mir2938	25	0	1.02	0.001	-9.99435	Down	2.41402e-08	3.69297e-08
novel_mir4993	25	0	1.02	0.001	-9.99435	Down	2.41402e-08	3.69075e-08
novel_mir4611	25	0	1.02	0.001	-9.99435	Down	2.41402e-08	3.68853e-08
novel_mir35	25	0	1.02	0.001	-9.99435	Down	2.41402e-08	3.68631e-08
novel_mir1308	25	0	1.02	0.001	-9.99435	Down	2.41402e-08	3.6841e-08
novel_mir2287	25	0	1.02	0.001	-9.99435	Down	2.41402e-08	3.68189e-08
novel_mir1193	25	0	1.02	0.001	-9.99435	Down	2.41402e-08	3.67968e-08
mmu-miR-6939-3p	25	0	1.02	0.001	-9.99435	Down	2.41402e-08	3.67747e-08
novel_mir3977	25	0	1.02	0.001	-9.99435	Down	2.41402e-08	3.67527e-08
mmu-miR-6914-3p	25	0	1.02	0.001	-9.99435	Down	2.41402e-08	3.67307e-08
novel_mir5595	25	0	1.02	0.001	-9.99435	Down	2.41402e-08	3.67087e-08
novel_mir771	25	0	1.02	0.001	-9.99435	Down	2.41402e-08	3.66868e-08
novel_mir6139	25	0	1.02	0.001	-9.99435	Down	2.41402e-08	3.66648e-08
novel_mir2682	25	0	1.02	0.001	-9.99435	Down	2.41402e-08	3.66429e-08
novel_mir1121	25	0	1.02	0.001	-9.99435	Down	2.41402e-08	3.6621e-08
novel_mir3312	25	0	1.02	0.001	-9.99435	Down	2.41402e-08	3.65992e-08
novel_mir4969	25	0	1.02	0.001	-9.99435	Down	2.41402e-08	3.65774e-08
novel_mir4951	25	0	1.02	0.001	-9.99435	Down	2.41402e-08	3.65556e-08
novel_mir1828	25	0	1.02	0.001	-9.99435	Down	2.41402e-08	3.65338e-08
novel_mir4963	25	0	1.02	0.001	-9.99435	Down	2.41402e-08	3.65121e-08
novel_mir2259	25	0	1.02	0.001	-9.99435	Down	2.41402e-08	3.64903e-08
novel_mir2953	25	0	1.02	0.001	-9.99435	Down	2.41402e-08	3.64686e-08
novel_mir525	25	0	1.02	0.001	-9.99435	Down	2.41402e-08	3.6447e-08
novel_mir3245	25	0	1.02	0.001	-9.99435	Down	2.41402e-08	3.64253e-08
novel_mir1804	25	0	1.02	0.001	-9.99435	Down	2.41402e-08	3.64037e-08
novel_mir4287	25	0	1.02	0.001	-9.99435	Down	2.41402e-08	3.63821e-08
novel_mir3776	25	0	1.02	0.001	-9.99435	Down	2.41402e-08	3.63606e-08
novel_mir3716	25	0	1.02	0.001	-9.99435	Down	2.41402e-08	3.6339e-08
novel_mir262	25	0	1.02	0.001	-9.99435	Down	2.41402e-08	3.63175e-08
novel_mir5337	25	0	1.02	0.001	-9.99435	Down	2.41402e-08	3.6296e-08
novel_mir4960	25	0	1.02	0.001	-9.99435	Down	2.41402e-08	3.62745e-08
novel_mir3675	25	0	1.02	0.001	-9.99435	Down	2.41402e-08	3.62531e-08
novel_mir613	25	0	1.02	0.001	-9.99435	Down	2.41402e-08	3.62317e-08
novel_mir4731	25	0	1.02	0.001	-9.99435	Down	2.41402e-08	3.62103e-08
novel_mir1719	25	0	1.02	0.001	-9.99435	Down	2.41402e-08	3.61889e-08
novel_mir1475	25	0	1.02	0.001	-9.99435	Down	2.41402e-08	3.61676e-08
novel_mir2207	25	0	1.02	0.001	-9.99435	Down	2.41402e-08	3.61463e-08
novel_mir5974	25	0	1.02	0.001	-9.99435	Down	2.41402e-08	3.6125e-08
novel_mir3434	25	0	1.02	0.001	-9.99435	Down	2.41402e-08	3.61037e-08
novel_mir917	24	0	0.98	0.001	-9.93664	Down	4.86734e-08	7.24117e-08
novel_mir1648	24	0	0.98	0.001	-9.93664	Down	4.86734e-08	7.23693e-08
novel_mir444	24	0	0.98	0.001	-9.93664	Down	4.86734e-08	7.2327e-08
novel_mir1996	24	0	0.98	0.001	-9.93664	Down	4.86734e-08	7.22847e-08
novel_mir5773	24	0	0.98	0.001	-9.93664	Down	4.86734e-08	7.22425e-08
novel_mir744	24	0	0.98	0.001	-9.93664	Down	4.86734e-08	7.22003e-08
novel_mir1554	24	0	0.98	0.001	-9.93664	Down	4.86734e-08	7.21582e-08
novel_mir2371	24	0	0.98	0.001	-9.93664	Down	4.86734e-08	7.21161e-08
novel_mir1207	24	0	0.98	0.001	-9.93664	Down	4.86734e-08	7.20741e-08
novel_mir2370	24	0	0.98	0.001	-9.93664	Down	4.86734e-08	7.20321e-08
novel_mir1572	24	0	0.98	0.001	-9.93664	Down	4.86734e-08	7.19902e-08
novel_mir5857	24	0	0.98	0.001	-9.93664	Down	4.86734e-08	7.19483e-08
novel_mir4886	24	0	0.98	0.001	-9.93664	Down	4.86734e-08	7.19065e-08
novel_mir4016	24	0	0.98	0.001	-9.93664	Down	4.86734e-08	7.18647e-08
novel_mir2707	24	0	0.98	0.001	-9.93664	Down	4.86734e-08	7.18229e-08
novel_mir3385	24	0	0.98	0.001	-9.93664	Down	4.86734e-08	7.17813e-08
novel_mir813	24	0	0.98	0.001	-9.93664	Down	4.86734e-08	7.17396e-08
novel_mir999	24	0	0.98	0.001	-9.93664	Down	4.86734e-08	7.1698e-08
novel_mir4739	24	0	0.98	0.001	-9.93664	Down	4.86734e-08	7.16565e-08
novel_mir1393	24	0	0.98	0.001	-9.93664	Down	4.86734e-08	7.1615e-08
novel_mir2099	24	0	0.98	0.001	-9.93664	Down	4.86734e-08	7.15736e-08
novel_mir1113	24	0	0.98	0.001	-9.93664	Down	4.86734e-08	7.15322e-08
novel_mir4476	24	0	0.98	0.001	-9.93664	Down	4.86734e-08	7.14908e-08
novel_mir3881	24	0	0.98	0.001	-9.93664	Down	4.86734e-08	7.14495e-08
novel_mir3427	24	0	0.98	0.001	-9.93664	Down	4.86734e-08	7.14083e-08
novel_mir3667	24	0	0.98	0.001	-9.93664	Down	4.86734e-08	7.13671e-08
novel_mir2755	24	0	0.98	0.001	-9.93664	Down	4.86734e-08	7.13259e-08
novel_mir2786	24	0	0.98	0.001	-9.93664	Down	4.86734e-08	7.12848e-08
novel_mir3162	24	0	0.98	0.001	-9.93664	Down	4.86734e-08	7.12437e-08
novel_mir1962	24	0	0.98	0.001	-9.93664	Down	4.86734e-08	7.12027e-08
novel_mir2973	24	0	0.98	0.001	-9.93664	Down	4.86734e-08	7.11617e-08
novel_mir6017	24	0	0.98	0.001	-9.93664	Down	4.86734e-08	7.11208e-08
novel_mir4006	23	0	0.94	0.001	-9.87652	Down	9.81388e-08	1.42906e-07
novel_mir5372	23	0	0.94	0.001	-9.87652	Down	9.81388e-08	1.42824e-07
novel_mir3568	23	0	0.94	0.001	-9.87652	Down	9.81388e-08	1.42742e-07
novel_mir3804	23	0	0.94	0.001	-9.87652	Down	9.81388e-08	1.42661e-07
novel_mir3009	23	0	0.94	0.001	-9.87652	Down	9.81388e-08	1.42579e-07
novel_mir2905	23	0	0.94	0.001	-9.87652	Down	9.81388e-08	1.42498e-07
novel_mir4161	23	0	0.94	0.001	-9.87652	Down	9.81388e-08	1.42416e-07
novel_mir1814	23	0	0.94	0.001	-9.87652	Down	9.81388e-08	1.42335e-07
novel_mir329	23	0	0.94	0.001	-9.87652	Down	9.81388e-08	1.42254e-07
novel_mir5301	23	0	0.94	0.001	-9.87652	Down	9.81388e-08	1.42173e-07
novel_mir2420	23	0	0.94	0.001	-9.87652	Down	9.81388e-08	1.42092e-07
novel_mir2400	23	0	0.94	0.001	-9.87652	Down	9.81388e-08	1.42011e-07
novel_mir635	23	0	0.94	0.001	-9.87652	Down	9.81388e-08	1.4193e-07
novel_mir1239	23	0	0.94	0.001	-9.87652	Down	9.81388e-08	1.41849e-07
novel_mir5870	23	0	0.94	0.001	-9.87652	Down	9.81388e-08	1.41768e-07
novel_mir1953	23	0	0.94	0.001	-9.87652	Down	9.81388e-08	1.41688e-07
novel_mir927	23	0	0.94	0.001	-9.87652	Down	9.81388e-08	1.41607e-07
novel_mir4396	23	0	0.94	0.001	-9.87652	Down	9.81388e-08	1.41527e-07
novel_mir5422	23	0	0.94	0.001	-9.87652	Down	9.81388e-08	1.41447e-07
novel_mir297	23	0	0.94	0.001	-9.87652	Down	9.81388e-08	1.41367e-07
novel_mir4627	23	0	0.94	0.001	-9.87652	Down	9.81388e-08	1.41287e-07
novel_mir4876	23	0	0.94	0.001	-9.87652	Down	9.81388e-08	1.41207e-07
novel_mir1527	23	0	0.94	0.001	-9.87652	Down	9.81388e-08	1.41127e-07
novel_mir2547	23	0	0.94	0.001	-9.87652	Down	9.81388e-08	1.41047e-07
novel_mir227	23	0	0.94	0.001	-9.87652	Down	9.81388e-08	1.40967e-07
novel_mir4749	23	0	0.94	0.001	-9.87652	Down	9.81388e-08	1.40887e-07
novel_mir4733	23	0	0.94	0.001	-9.87652	Down	9.81388e-08	1.40808e-07
novel_mir1295	23	0	0.94	0.001	-9.87652	Down	9.81388e-08	1.40728e-07
novel_mir2056	23	0	0.94	0.001	-9.87652	Down	9.81388e-08	1.40649e-07
novel_mir1312	23	0	0.94	0.001	-9.87652	Down	9.81388e-08	1.4057e-07
novel_mir1848	23	0	0.94	0.001	-9.87652	Down	9.81388e-08	1.40491e-07
novel_mir198	23	0	0.94	0.001	-9.87652	Down	9.81388e-08	1.40411e-07
novel_mir2226	23	0	0.94	0.001	-9.87652	Down	9.81388e-08	1.40332e-07
novel_mir5764	23	0	0.94	0.001	-9.87652	Down	9.81388e-08	1.40253e-07
novel_mir5442	23	0	0.94	0.001	-9.87652	Down	9.81388e-08	1.40175e-07
novel_mir2780	23	0	0.94	0.001	-9.87652	Down	9.81388e-08	1.40096e-07
novel_mir747	23	0	0.94	0.001	-9.87652	Down	9.81388e-08	1.40017e-07
novel_mir5268	23	0	0.94	0.001	-9.87652	Down	9.81388e-08	1.39939e-07
novel_mir1226	23	0	0.94	0.001	-9.87652	Down	9.81388e-08	1.3986e-07
novel_mir5993	23	0	0.94	0.001	-9.87652	Down	9.81388e-08	1.39782e-07
novel_mir568	23	0	0.94	0.001	-9.87652	Down	9.81388e-08	1.39703e-07
novel_mir34	23	0	0.94	0.001	-9.87652	Down	9.81388e-08	1.39625e-07
novel_mir1976	23	0	0.94	0.001	-9.87652	Down	9.81388e-08	1.39547e-07
novel_mir4550	23	0	0.94	0.001	-9.87652	Down	9.81388e-08	1.39469e-07
novel_mir3866	22	0	0.9	0.001	-9.81378	Down	1.97875e-07	2.79799e-07
novel_mir1317	22	0	0.9	0.001	-9.81378	Down	1.97875e-07	2.79644e-07
novel_mir738	22	0	0.9	0.001	-9.81378	Down	1.97875e-07	2.79488e-07
novel_mir4849	22	0	0.9	0.001	-9.81378	Down	1.97875e-07	2.79333e-07
novel_mir5040	22	0	0.9	0.001	-9.81378	Down	1.97875e-07	2.79178e-07
novel_mir5391	22	0	0.9	0.001	-9.81378	Down	1.97875e-07	2.79023e-07
novel_mir1609	22	0	0.9	0.001	-9.81378	Down	1.97875e-07	2.78868e-07
novel_mir4526	22	0	0.9	0.001	-9.81378	Down	1.97875e-07	2.78714e-07
novel_mir2684	22	0	0.9	0.001	-9.81378	Down	1.97875e-07	2.78559e-07
novel_mir5689	22	0	0.9	0.001	-9.81378	Down	1.97875e-07	2.78405e-07
novel_mir760	22	0	0.9	0.001	-9.81378	Down	1.97875e-07	2.78251e-07
novel_mir4112	22	0	0.9	0.001	-9.81378	Down	1.97875e-07	2.78097e-07
novel_mir4011	22	0	0.9	0.001	-9.81378	Down	1.97875e-07	2.77943e-07
novel_mir1244	22	0	0.9	0.001	-9.81378	Down	1.97875e-07	2.7779e-07
novel_mir1584	22	0	0.9	0.001	-9.81378	Down	1.97875e-07	2.77636e-07
novel_mir585	22	0	0.9	0.001	-9.81378	Down	1.97875e-07	2.77483e-07
novel_mir4220	22	0	0.9	0.001	-9.81378	Down	1.97875e-07	2.7733e-07
novel_mir660	22	0	0.9	0.001	-9.81378	Down	1.97875e-07	2.77177e-07
novel_mir3105	22	0	0.9	0.001	-9.81378	Down	1.97875e-07	2.77024e-07
novel_mir2406	22	0	0.9	0.001	-9.81378	Down	1.97875e-07	2.76872e-07
novel_mir19	22	0	0.9	0.001	-9.81378	Down	1.97875e-07	2.7672e-07
novel_mir2750	22	0	0.9	0.001	-9.81378	Down	1.97875e-07	2.76567e-07
novel_mir1058	22	0	0.9	0.001	-9.81378	Down	1.97875e-07	2.76415e-07
novel_mir5178	22	0	0.9	0.001	-9.81378	Down	1.97875e-07	2.76263e-07
novel_mir3872	22	0	0.9	0.001	-9.81378	Down	1.97875e-07	2.76112e-07
novel_mir1658	22	0	0.9	0.001	-9.81378	Down	1.97875e-07	2.7596e-07
novel_mir6117	22	0	0.9	0.001	-9.81378	Down	1.97875e-07	2.75809e-07
novel_mir292	22	0	0.9	0.001	-9.81378	Down	1.97875e-07	2.75658e-07
novel_mir1367	22	0	0.9	0.001	-9.81378	Down	1.97875e-07	2.75506e-07
novel_mir4442	21	0	0.86	0.001	-9.74819	Down	3.9897e-07	5.53375e-07
novel_mir5763	21	0	0.86	0.001	-9.74819	Down	3.9897e-07	5.53073e-07
novel_mir2468	21	0	0.86	0.001	-9.74819	Down	3.9897e-07	5.52771e-07
novel_mir273	21	0	0.86	0.001	-9.74819	Down	3.9897e-07	5.5247e-07
novel_mir2768	21	0	0.86	0.001	-9.74819	Down	3.9897e-07	5.52169e-07
novel_mir787	21	0	0.86	0.001	-9.74819	Down	3.9897e-07	5.51869e-07
novel_mir4048	21	0	0.86	0.001	-9.74819	Down	3.9897e-07	5.51568e-07
novel_mir6164	21	0	0.86	0.001	-9.74819	Down	3.9897e-07	5.51268e-07
novel_mir1669	21	0	0.86	0.001	-9.74819	Down	3.9897e-07	5.50969e-07
novel_mir3433	21	0	0.86	0.001	-9.74819	Down	3.9897e-07	5.5067e-07
novel_mir2634	21	0	0.86	0.001	-9.74819	Down	3.9897e-07	5.50371e-07
novel_mir653	21	0	0.86	0.001	-9.74819	Down	3.9897e-07	5.50072e-07
novel_mir2133	21	0	0.86	0.001	-9.74819	Down	3.9897e-07	5.49774e-07
novel_mir1198	21	0	0.86	0.001	-9.74819	Down	3.9897e-07	5.49476e-07
novel_mir3859	21	0	0.86	0.001	-9.74819	Down	3.9897e-07	5.49178e-07
novel_mir5838	21	0	0.86	0.001	-9.74819	Down	3.9897e-07	5.48881e-07
novel_mir3519	21	0	0.86	0.001	-9.74819	Down	3.9897e-07	5.48584e-07
novel_mir2061	21	0	0.86	0.001	-9.74819	Down	3.9897e-07	5.48287e-07
novel_mir5049	21	0	0.86	0.001	-9.74819	Down	3.9897e-07	5.47991e-07
novel_mir1292	21	0	0.86	0.001	-9.74819	Down	3.9897e-07	5.47695e-07
novel_mir5116	21	0	0.86	0.001	-9.74819	Down	3.9897e-07	5.47399e-07
novel_mir1425	21	0	0.86	0.001	-9.74819	Down	3.9897e-07	5.47103e-07
novel_mir493	21	0	0.86	0.001	-9.74819	Down	3.9897e-07	5.46808e-07
novel_mir4228	21	0	0.86	0.001	-9.74819	Down	3.9897e-07	5.46514e-07
novel_mir5023	21	0	0.86	0.001	-9.74819	Down	3.9897e-07	5.46219e-07
novel_mir634	21	0	0.86	0.001	-9.74819	Down	3.9897e-07	5.45925e-07
novel_mir5036	21	0	0.86	0.001	-9.74819	Down	3.9897e-07	5.45631e-07
novel_mir5863	21	0	0.86	0.001	-9.74819	Down	3.9897e-07	5.45338e-07
novel_mir1875	21	0	0.86	0.001	-9.74819	Down	3.9897e-07	5.45045e-07
novel_mir5253	21	0	0.86	0.001	-9.74819	Down	3.9897e-07	5.44752e-07
novel_mir5590	21	0	0.86	0.001	-9.74819	Down	3.9897e-07	5.44459e-07
mmu-miR-467a-3p	21	0	0.86	0.001	-9.74819	Down	3.9897e-07	5.44167e-07
novel_mir2423	21	0	0.86	0.001	-9.74819	Down	3.9897e-07	5.43875e-07
novel_mir1252	20	0	0.81	0.001	-9.66178	Down	8.04432e-07	1.08959e-06
mmu-let-7i-3p	20	0	0.81	0.001	-9.66178	Down	8.04432e-07	1.089e-06
novel_mir3183	20	0	0.81	0.001	-9.66178	Down	8.04432e-07	1.08842e-06
novel_mir5481	20	0	0.81	0.001	-9.66178	Down	8.04432e-07	1.08785e-06
novel_mir962	20	0	0.81	0.001	-9.66178	Down	8.04432e-07	1.08727e-06
novel_mir3109	20	0	0.81	0.001	-9.66178	Down	8.04432e-07	1.08669e-06
novel_mir3478	20	0	0.81	0.001	-9.66178	Down	8.04432e-07	1.08611e-06
novel_mir4382	20	0	0.81	0.001	-9.66178	Down	8.04432e-07	1.08553e-06
novel_mir720	20	0	0.81	0.001	-9.66178	Down	8.04432e-07	1.08496e-06
novel_mir2247	20	0	0.81	0.001	-9.66178	Down	8.04432e-07	1.08438e-06
novel_mir1744	20	0	0.81	0.001	-9.66178	Down	8.04432e-07	1.08381e-06
novel_mir2544	20	0	0.81	0.001	-9.66178	Down	8.04432e-07	1.08323e-06
novel_mir5841	20	0	0.81	0.001	-9.66178	Down	8.04432e-07	1.08266e-06
novel_mir3613	20	0	0.81	0.001	-9.66178	Down	8.04432e-07	1.08209e-06
novel_mir2436	20	0	0.81	0.001	-9.66178	Down	8.04432e-07	1.08151e-06
novel_mir5770	20	0	0.81	0.001	-9.66178	Down	8.04432e-07	1.08094e-06
novel_mir1142	20	0	0.81	0.001	-9.66178	Down	8.04432e-07	1.08037e-06
novel_mir4317	20	0	0.81	0.001	-9.66178	Down	8.04432e-07	1.0798e-06
novel_mir5634	20	0	0.81	0.001	-9.66178	Down	8.04432e-07	1.07923e-06
novel_mir725	20	0	0.81	0.001	-9.66178	Down	8.04432e-07	1.07866e-06
novel_mir2632	20	0	0.81	0.001	-9.66178	Down	8.04432e-07	1.07809e-06
novel_mir3959	20	0	0.81	0.001	-9.66178	Down	8.04432e-07	1.07752e-06
novel_mir1910	20	0	0.81	0.001	-9.66178	Down	8.04432e-07	1.07696e-06
novel_mir1258	20	0	0.81	0.001	-9.66178	Down	8.04432e-07	1.07639e-06
novel_mir1024	20	0	0.81	0.001	-9.66178	Down	8.04432e-07	1.07582e-06
novel_mir5299	20	0	0.81	0.001	-9.66178	Down	8.04432e-07	1.07526e-06
novel_mir350	20	0	0.81	0.001	-9.66178	Down	8.04432e-07	1.07469e-06
novel_mir5730	20	0	0.81	0.001	-9.66178	Down	8.04432e-07	1.07413e-06
novel_mir1468	20	0	0.81	0.001	-9.66178	Down	8.04432e-07	1.07356e-06
novel_mir5512	20	0	0.81	0.001	-9.66178	Down	8.04432e-07	1.073e-06
novel_mir1023	20	0	0.81	0.001	-9.66178	Down	8.04432e-07	1.07244e-06
novel_mir3332	20	0	0.81	0.001	-9.66178	Down	8.04432e-07	1.07187e-06
novel_mir3180	20	0	0.81	0.001	-9.66178	Down	8.04432e-07	1.07131e-06
novel_mir385	20	0	0.81	0.001	-9.66178	Down	8.04432e-07	1.07075e-06
novel_mir4026	20	0	0.81	0.001	-9.66178	Down	8.04432e-07	1.07019e-06
novel_mir572	19	0	0.77	0.001	-9.58871	Down	1.62196e-06	2.15104e-06
novel_mir1167	19	0	0.77	0.001	-9.58871	Down	1.62196e-06	2.14992e-06
novel_mir4811	19	0	0.77	0.001	-9.58871	Down	1.62196e-06	2.1488e-06
novel_mir3949	19	0	0.77	0.001	-9.58871	Down	1.62196e-06	2.14768e-06
novel_mir3030	19	0	0.77	0.001	-9.58871	Down	1.62196e-06	2.14656e-06
novel_mir4872	19	0	0.77	0.001	-9.58871	Down	1.62196e-06	2.14544e-06
novel_mir1020	19	0	0.77	0.001	-9.58871	Down	1.62196e-06	2.14432e-06
novel_mir883	19	0	0.77	0.001	-9.58871	Down	1.62196e-06	2.14321e-06
novel_mir1208	19	0	0.77	0.001	-9.58871	Down	1.62196e-06	2.14209e-06
novel_mir341	19	0	0.77	0.001	-9.58871	Down	1.62196e-06	2.14098e-06
novel_mir6128	19	0	0.77	0.001	-9.58871	Down	1.62196e-06	2.13987e-06
novel_mir2069	19	0	0.77	0.001	-9.58871	Down	1.62196e-06	2.13876e-06
novel_mir3202	19	0	0.77	0.001	-9.58871	Down	1.62196e-06	2.13765e-06
novel_mir1297	19	0	0.77	0.001	-9.58871	Down	1.62196e-06	2.13654e-06
novel_mir4615	19	0	0.77	0.001	-9.58871	Down	1.62196e-06	2.13544e-06
novel_mir3984	19	0	0.77	0.001	-9.58871	Down	1.62196e-06	2.13433e-06
novel_mir5297	19	0	0.77	0.001	-9.58871	Down	1.62196e-06	2.13322e-06
novel_mir6068	19	0	0.77	0.001	-9.58871	Down	1.62196e-06	2.13212e-06
novel_mir1093	19	0	0.77	0.001	-9.58871	Down	1.62196e-06	2.13102e-06
novel_mir2542	19	0	0.77	0.001	-9.58871	Down	1.62196e-06	2.12992e-06
novel_mir4888	19	0	0.77	0.001	-9.58871	Down	1.62196e-06	2.12882e-06
novel_mir2293	19	0	0.77	0.001	-9.58871	Down	1.62196e-06	2.12772e-06
novel_mir1325	19	0	0.77	0.001	-9.58871	Down	1.62196e-06	2.12662e-06
novel_mir3063	19	0	0.77	0.001	-9.58871	Down	1.62196e-06	2.12552e-06
novel_mir5241	19	0	0.77	0.001	-9.58871	Down	1.62196e-06	2.12443e-06
novel_mir2603	19	0	0.77	0.001	-9.58871	Down	1.62196e-06	2.12333e-06
novel_mir3812	19	0	0.77	0.001	-9.58871	Down	1.62196e-06	2.12224e-06
novel_mir748	19	0	0.77	0.001	-9.58871	Down	1.62196e-06	2.12115e-06
novel_mir573	19	0	0.77	0.001	-9.58871	Down	1.62196e-06	2.12006e-06
novel_mir2550	18	0	0.73	0.001	-9.51175	Down	3.2703e-06	4.24838e-06
novel_mir6065	18	0	0.73	0.001	-9.51175	Down	3.2703e-06	4.24621e-06
novel_mir1750	18	0	0.73	0.001	-9.51175	Down	3.2703e-06	4.24404e-06
novel_mir5910	18	0	0.73	0.001	-9.51175	Down	3.2703e-06	4.24187e-06
novel_mir27	18	0	0.73	0.001	-9.51175	Down	3.2703e-06	4.23971e-06
novel_mir520	18	0	0.73	0.001	-9.51175	Down	3.2703e-06	4.23755e-06
novel_mir3449	18	0	0.73	0.001	-9.51175	Down	3.2703e-06	4.23539e-06
novel_mir4701	18	0	0.73	0.001	-9.51175	Down	3.2703e-06	4.23323e-06
novel_mir1214	18	0	0.73	0.001	-9.51175	Down	3.2703e-06	4.23108e-06
novel_mir1278	18	0	0.73	0.001	-9.51175	Down	3.2703e-06	4.22892e-06
novel_mir2200	18	0	0.73	0.001	-9.51175	Down	3.2703e-06	4.22677e-06
novel_mir3680	18	0	0.73	0.001	-9.51175	Down	3.2703e-06	4.22462e-06
novel_mir3507	18	0	0.73	0.001	-9.51175	Down	3.2703e-06	4.22248e-06
novel_mir1028	18	0	0.73	0.001	-9.51175	Down	3.2703e-06	4.22033e-06
novel_mir1839	18	0	0.73	0.001	-9.51175	Down	3.2703e-06	4.21819e-06
novel_mir4241	18	0	0.73	0.001	-9.51175	Down	3.2703e-06	4.21605e-06
novel_mir3610	18	0	0.73	0.001	-9.51175	Down	3.2703e-06	4.21391e-06
novel_mir1777	18	0	0.73	0.001	-9.51175	Down	3.2703e-06	4.21178e-06
novel_mir5655	18	0	0.73	0.001	-9.51175	Down	3.2703e-06	4.20964e-06
novel_mir3381	18	0	0.73	0.001	-9.51175	Down	3.2703e-06	4.20751e-06
novel_mir961	18	0	0.73	0.001	-9.51175	Down	3.2703e-06	4.20538e-06
novel_mir2118	18	0	0.73	0.001	-9.51175	Down	3.2703e-06	4.20325e-06
novel_mir3411	18	0	0.73	0.001	-9.51175	Down	3.2703e-06	4.20113e-06
novel_mir890	18	0	0.73	0.001	-9.51175	Down	3.2703e-06	4.19901e-06
novel_mir2349	18	0	0.73	0.001	-9.51175	Down	3.2703e-06	4.19689e-06
novel_mir5790	18	0	0.73	0.001	-9.51175	Down	3.2703e-06	4.19477e-06
novel_mir1982	18	0	0.73	0.001	-9.51175	Down	3.2703e-06	4.19265e-06
novel_mir4319	18	0	0.73	0.001	-9.51175	Down	3.2703e-06	4.19054e-06
novel_mir3452	18	0	0.73	0.001	-9.51175	Down	3.2703e-06	4.18842e-06
novel_mir2313	18	0	0.73	0.001	-9.51175	Down	3.2703e-06	4.18631e-06
novel_mir2765	18	0	0.73	0.001	-9.51175	Down	3.2703e-06	4.18421e-06
novel_mir4039	18	0	0.73	0.001	-9.51175	Down	3.2703e-06	4.1821e-06
novel_mir863	18	0	0.73	0.001	-9.51175	Down	3.2703e-06	4.18e-06
novel_mir29	18	0	0.73	0.001	-9.51175	Down	3.2703e-06	4.17789e-06
novel_mir4399	18	0	0.73	0.001	-9.51175	Down	3.2703e-06	4.1758e-06
novel_mir4778	18	0	0.73	0.001	-9.51175	Down	3.2703e-06	4.1737e-06
novel_mir1343	17	0	0.69	0.001	-9.43045	Down	6.59384e-06	8.35658e-06
novel_mir2599	17	0	0.69	0.001	-9.43045	Down	6.59384e-06	8.35242e-06
novel_mir4645	17	0	0.69	0.001	-9.43045	Down	6.59384e-06	8.34825e-06
novel_mir3071	17	0	0.69	0.001	-9.43045	Down	6.59384e-06	8.3441e-06
novel_mir290	17	0	0.69	0.001	-9.43045	Down	6.59384e-06	8.33994e-06
novel_mir3783	17	0	0.69	0.001	-9.43045	Down	6.59384e-06	8.33579e-06
novel_mir3580	17	0	0.69	0.001	-9.43045	Down	6.59384e-06	8.33165e-06
novel_mir4721	17	0	0.69	0.001	-9.43045	Down	6.59384e-06	8.32751e-06
novel_mir4231	17	0	0.69	0.001	-9.43045	Down	6.59384e-06	8.32337e-06
novel_mir1559	17	0	0.69	0.001	-9.43045	Down	6.59384e-06	8.31924e-06
novel_mir6149	17	0	0.69	0.001	-9.43045	Down	6.59384e-06	8.31511e-06
novel_mir5549	17	0	0.69	0.001	-9.43045	Down	6.59384e-06	8.31099e-06
novel_mir4508	17	0	0.69	0.001	-9.43045	Down	6.59384e-06	8.30687e-06
novel_mir3780	17	0	0.69	0.001	-9.43045	Down	6.59384e-06	8.30275e-06
novel_mir4590	17	0	0.69	0.001	-9.43045	Down	6.59384e-06	8.29864e-06
novel_mir3798	17	0	0.69	0.001	-9.43045	Down	6.59384e-06	8.29453e-06
novel_mir2029	17	0	0.69	0.001	-9.43045	Down	6.59384e-06	8.29042e-06
novel_mir261	17	0	0.69	0.001	-9.43045	Down	6.59384e-06	8.28632e-06
novel_mir414	17	0	0.69	0.001	-9.43045	Down	6.59384e-06	8.28223e-06
novel_mir4753	17	0	0.69	0.001	-9.43045	Down	6.59384e-06	8.27814e-06
novel_mir3218	17	0	0.69	0.001	-9.43045	Down	6.59384e-06	8.27405e-06
novel_mir1623	17	0	0.69	0.001	-9.43045	Down	6.59384e-06	8.26996e-06
novel_mir4495	17	0	0.69	0.001	-9.43045	Down	6.59384e-06	8.26588e-06
novel_mir4516	17	0	0.69	0.001	-9.43045	Down	6.59384e-06	8.26181e-06
novel_mir5711	17	0	0.69	0.001	-9.43045	Down	6.59384e-06	8.25774e-06
novel_mir3127	17	0	0.69	0.001	-9.43045	Down	6.59384e-06	8.25367e-06
novel_mir4214	17	0	0.69	0.001	-9.43045	Down	6.59384e-06	8.2496e-06
novel_mir4909	17	0	0.69	0.001	-9.43045	Down	6.59384e-06	8.24555e-06
novel_mir4848	16	0	0.65	0.001	-9.3443	Down	1.3295e-05	1.65926e-05
novel_mir3011	16	0	0.65	0.001	-9.3443	Down	1.3295e-05	1.65845e-05
novel_mir4355	16	0	0.65	0.001	-9.3443	Down	1.3295e-05	1.65763e-05
novel_mir2605	16	0	0.65	0.001	-9.3443	Down	1.3295e-05	1.65682e-05
novel_mir2403	16	0	0.65	0.001	-9.3443	Down	1.3295e-05	1.65601e-05
novel_mir5082	16	0	0.65	0.001	-9.3443	Down	1.3295e-05	1.6552e-05
novel_mir4758	16	0	0.65	0.001	-9.3443	Down	1.3295e-05	1.65439e-05
mmu-miR-532-3p	16	0	0.65	0.001	-9.3443	Down	1.3295e-05	1.65358e-05
novel_mir300	16	0	0.65	0.001	-9.3443	Down	1.3295e-05	1.65277e-05
novel_mir2256	16	0	0.65	0.001	-9.3443	Down	1.3295e-05	1.65196e-05
novel_mir4655	16	0	0.65	0.001	-9.3443	Down	1.3295e-05	1.65115e-05
novel_mir254	16	0	0.65	0.001	-9.3443	Down	1.3295e-05	1.65034e-05
novel_mir1171	16	0	0.65	0.001	-9.3443	Down	1.3295e-05	1.64954e-05
novel_mir946	16	0	0.65	0.001	-9.3443	Down	1.3295e-05	1.64873e-05
novel_mir3535	16	0	0.65	0.001	-9.3443	Down	1.3295e-05	1.64793e-05
novel_mir3714	16	0	0.65	0.001	-9.3443	Down	1.3295e-05	1.64713e-05
novel_mir835	16	0	0.65	0.001	-9.3443	Down	1.3295e-05	1.64632e-05
novel_mir4566	16	0	0.65	0.001	-9.3443	Down	1.3295e-05	1.64552e-05
novel_mir3646	16	0	0.65	0.001	-9.3443	Down	1.3295e-05	1.64472e-05
novel_mir1636	16	0	0.65	0.001	-9.3443	Down	1.3295e-05	1.64392e-05
novel_mir1445	16	0	0.65	0.001	-9.3443	Down	1.3295e-05	1.64312e-05
novel_mir3310	16	0	0.65	0.001	-9.3443	Down	1.3295e-05	1.64232e-05
novel_mir4997	16	0	0.65	0.001	-9.3443	Down	1.3295e-05	1.64152e-05
novel_mir842	16	0	0.65	0.001	-9.3443	Down	1.3295e-05	1.64073e-05
novel_mir5404	16	0	0.65	0.001	-9.3443	Down	1.3295e-05	1.63993e-05
novel_mir3363	16	0	0.65	0.001	-9.3443	Down	1.3295e-05	1.63913e-05
novel_mir344	16	0	0.65	0.001	-9.3443	Down	1.3295e-05	1.63834e-05
novel_mir2289	16	0	0.65	0.001	-9.3443	Down	1.3295e-05	1.63754e-05
novel_mir1624	15	0	0.61	0.001	-9.25267	Down	2.68064e-05	3.28107e-05
novel_mir731	15	0	0.61	0.001	-9.25267	Down	2.68064e-05	3.27949e-05
novel_mir1692	15	0	0.61	0.001	-9.25267	Down	2.68064e-05	3.27791e-05
novel_mir5984	15	0	0.61	0.001	-9.25267	Down	2.68064e-05	3.27634e-05
novel_mir5658	15	0	0.61	0.001	-9.25267	Down	2.68064e-05	3.27476e-05
novel_mir129	15	0	0.61	0.001	-9.25267	Down	2.68064e-05	3.27319e-05
novel_mir2960	15	0	0.61	0.001	-9.25267	Down	2.68064e-05	3.27162e-05
novel_mir1657	15	0	0.61	0.001	-9.25267	Down	2.68064e-05	3.27005e-05
novel_mir550	15	0	0.61	0.001	-9.25267	Down	2.68064e-05	3.26848e-05
novel_mir3998	15	0	0.61	0.001	-9.25267	Down	2.68064e-05	3.26691e-05
novel_mir3430	15	0	0.61	0.001	-9.25267	Down	2.68064e-05	3.26534e-05
novel_mir3696	15	0	0.61	0.001	-9.25267	Down	2.68064e-05	3.26378e-05
novel_mir2261	15	0	0.61	0.001	-9.25267	Down	2.68064e-05	3.26222e-05
novel_mir250	15	0	0.61	0.001	-9.25267	Down	2.68064e-05	3.26065e-05
novel_mir3966	15	0	0.61	0.001	-9.25267	Down	2.68064e-05	3.25909e-05
novel_mir825	15	0	0.61	0.001	-9.25267	Down	2.68064e-05	3.25754e-05
novel_mir3263	15	0	0.61	0.001	-9.25267	Down	2.68064e-05	3.25598e-05
novel_mir2694	15	0	0.61	0.001	-9.25267	Down	2.68064e-05	3.25442e-05
novel_mir809	15	0	0.61	0.001	-9.25267	Down	2.68064e-05	3.25287e-05
novel_mir2116	15	0	0.61	0.001	-9.25267	Down	2.68064e-05	3.25132e-05
novel_mir4781	15	0	0.61	0.001	-9.25267	Down	2.68064e-05	3.24976e-05
novel_mir4539	15	0	0.61	0.001	-9.25267	Down	2.68064e-05	3.24821e-05
novel_mir5215	15	0	0.61	0.001	-9.25267	Down	2.68064e-05	3.24667e-05
novel_mir1105	15	0	0.61	0.001	-9.25267	Down	2.68064e-05	3.24512e-05
novel_mir3289	15	0	0.61	0.001	-9.25267	Down	2.68064e-05	3.24357e-05
novel_mir4892	14	0	0.57	0.001	-9.15482	Down	5.40488e-05	6.50275e-05
novel_mir4138	14	0	0.57	0.001	-9.15482	Down	5.40488e-05	6.49967e-05
novel_mir3012	14	0	0.57	0.001	-9.15482	Down	5.40488e-05	6.49659e-05
novel_mir3767	14	0	0.57	0.001	-9.15482	Down	5.40488e-05	6.49352e-05
novel_mir1968	14	0	0.57	0.001	-9.15482	Down	5.40488e-05	6.49045e-05
novel_mir4823	14	0	0.57	0.001	-9.15482	Down	5.40488e-05	6.48739e-05
novel_mir3396	14	0	0.57	0.001	-9.15482	Down	5.40488e-05	6.48432e-05
novel_mir14	14	0	0.57	0.001	-9.15482	Down	5.40488e-05	6.48126e-05
novel_mir595	14	0	0.57	0.001	-9.15482	Down	5.40488e-05	6.47821e-05
novel_mir4538	14	0	0.57	0.001	-9.15482	Down	5.40488e-05	6.47515e-05
novel_mir3134	14	0	0.57	0.001	-9.15482	Down	5.40488e-05	6.4721e-05
novel_mir5197	14	0	0.57	0.001	-9.15482	Down	5.40488e-05	6.46905e-05
novel_mir2872	14	0	0.57	0.001	-9.15482	Down	5.40488e-05	6.46601e-05
novel_mir4934	14	0	0.57	0.001	-9.15482	Down	5.40488e-05	6.46296e-05
novel_mir1223	14	0	0.57	0.001	-9.15482	Down	5.40488e-05	6.45992e-05
novel_mir4769	14	0	0.57	0.001	-9.15482	Down	5.40488e-05	6.45689e-05
novel_mir5295	14	0	0.57	0.001	-9.15482	Down	5.40488e-05	6.45385e-05
novel_mir592	14	0	0.57	0.001	-9.15482	Down	5.40488e-05	6.45082e-05
novel_mir6021	14	0	0.57	0.001	-9.15482	Down	5.40488e-05	6.44779e-05
novel_mir58	14	0	0.57	0.001	-9.15482	Down	5.40488e-05	6.44477e-05
novel_mir3643	14	0	0.57	0.001	-9.15482	Down	5.40488e-05	6.44174e-05
novel_mir3017	14	0	0.57	0.001	-9.15482	Down	5.40488e-05	6.43872e-05
novel_mir2430	14	0	0.57	0.001	-9.15482	Down	5.40488e-05	6.43571e-05
novel_mir392	14	0	0.57	0.001	-9.15482	Down	5.40488e-05	6.43269e-05
novel_mir1049	14	0	0.57	0.001	-9.15482	Down	5.40488e-05	6.42968e-05
novel_mir609	14	0	0.57	0.001	-9.15482	Down	5.40488e-05	6.42667e-05
novel_mir3649	14	0	0.57	0.001	-9.15482	Down	5.40488e-05	6.42367e-05
novel_mir4181	13	0	0.53	0.001	-9.04985	Down	0.000108977	0.000128976
novel_mir2639	13	0	0.53	0.001	-9.04985	Down	0.000108977	0.000128916
novel_mir3937	13	0	0.53	0.001	-9.04985	Down	0.000108977	0.000128856
novel_mir2169	13	0	0.53	0.001	-9.04985	Down	0.000108977	0.000128796
novel_mir1172	13	0	0.53	0.001	-9.04985	Down	0.000108977	0.000128736
novel_mir4699	13	0	0.53	0.001	-9.04985	Down	0.000108977	0.000128676
mmu-miR-669a-5p,mmu-miR-669p-5p	13	0	0.53	0.001	-9.04985	Down	0.000108977	0.000128617
novel_mir6016	13	0	0.53	0.001	-9.04985	Down	0.000108977	0.000128557
novel_mir705	13	0	0.53	0.001	-9.04985	Down	0.000108977	0.000128497
novel_mir2347	13	0	0.53	0.001	-9.04985	Down	0.000108977	0.000128438
novel_mir2183	13	0	0.53	0.001	-9.04985	Down	0.000108977	0.000128378
novel_mir3382	13	0	0.53	0.001	-9.04985	Down	0.000108977	0.000128319
novel_mir833	13	0	0.53	0.001	-9.04985	Down	0.000108977	0.000128259
novel_mir5277	13	0	0.53	0.001	-9.04985	Down	0.000108977	0.0001282
novel_mir554	13	0	0.53	0.001	-9.04985	Down	0.000108977	0.00012814
novel_mir1132	13	0	0.53	0.001	-9.04985	Down	0.000108977	0.000128081
novel_mir2350	13	0	0.53	0.001	-9.04985	Down	0.000108977	0.000128022
novel_mir2121	12	0	0.49	0.001	-8.93664	Down	0.000219728	0.000257057
novel_mir3059	12	0	0.49	0.001	-8.93664	Down	0.000219728	0.000256939
novel_mir4040	12	0	0.49	0.001	-8.93664	Down	0.000219728	0.000256821
novel_mir3072	12	0	0.49	0.001	-8.93664	Down	0.000219728	0.000256703
novel_mir1553	12	0	0.49	0.001	-8.93664	Down	0.000219728	0.000256585
novel_mir1830	12	0	0.49	0.001	-8.93664	Down	0.000219728	0.000256467
novel_mir214	12	0	0.49	0.001	-8.93664	Down	0.000219728	0.000256349
novel_mir4035	12	0	0.49	0.001	-8.93664	Down	0.000219728	0.000256232
novel_mir1864	12	0	0.49	0.001	-8.93664	Down	0.000219728	0.000256114
novel_mir3970	12	0	0.49	0.001	-8.93664	Down	0.000219728	0.000255997
novel_mir24	12	0	0.49	0.001	-8.93664	Down	0.000219728	0.000255879
novel_mir39	12	0	0.49	0.001	-8.93664	Down	0.000219728	0.000255762
novel_mir2295	12	0	0.49	0.001	-8.93664	Down	0.000219728	0.000255645
novel_mir2011	12	0	0.49	0.001	-8.93664	Down	0.000219728	0.000255528
novel_mir456	12	0	0.49	0.001	-8.93664	Down	0.000219728	0.000255411
novel_mir2038	12	0	0.49	0.001	-8.93664	Down	0.000219728	0.000255294
novel_mir3763	12	0	0.49	0.001	-8.93664	Down	0.000219728	0.000255178
novel_mir1232	12	0	0.49	0.001	-8.93664	Down	0.000219728	0.000255061
novel_mir2925	12	0	0.49	0.001	-8.93664	Down	0.000219728	0.000254945
novel_mir822	12	0	0.49	0.001	-8.93664	Down	0.000219728	0.000254828
novel_mir3817	12	0	0.49	0.001	-8.93664	Down	0.000219728	0.000254712
novel_mir4747	12	0	0.49	0.001	-8.93664	Down	0.000219728	0.000254596
novel_mir286	12	0	0.49	0.001	-8.93664	Down	0.000219728	0.00025448
novel_mir4173	12	0	0.49	0.001	-8.93664	Down	0.000219728	0.000254364
novel_mir212	12	0	0.49	0.001	-8.93664	Down	0.000219728	0.000254248
novel_mir1424	12	0	0.49	0.001	-8.93664	Down	0.000219728	0.000254132
novel_mir1074	12	0	0.49	0.001	-8.93664	Down	0.000219728	0.000254017
novel_mir3542	12	0	0.49	0.001	-8.93664	Down	0.000219728	0.000253901
novel_mir1281	11	0	0.45	0.001	-8.81378	Down	0.000443032	0.000509156
novel_mir5701	11	0	0.45	0.001	-8.81378	Down	0.000443032	0.000508926
novel_mir4908	11	0	0.45	0.001	-8.81378	Down	0.000443032	0.000508696
novel_mir1411	11	0	0.45	0.001	-8.81378	Down	0.000443032	0.000508466
novel_mir622	11	0	0.45	0.001	-8.81378	Down	0.000443032	0.000508237
novel_mir1598	11	0	0.45	0.001	-8.81378	Down	0.000443032	0.000508007
novel_mir2762	11	0	0.45	0.001	-8.81378	Down	0.000443032	0.000507778
novel_mir967	11	0	0.45	0.001	-8.81378	Down	0.000443032	0.000507549
novel_mir2012	11	0	0.45	0.001	-8.81378	Down	0.000443032	0.000507321
novel_mir5703	11	0	0.45	0.001	-8.81378	Down	0.000443032	0.000507092
novel_mir838	11	0	0.45	0.001	-8.81378	Down	0.000443032	0.000506864
novel_mir1724	11	0	0.45	0.001	-8.81378	Down	0.000443032	0.000506636
novel_mir5336	11	0	0.45	0.001	-8.81378	Down	0.000443032	0.000506408
novel_mir354	11	0	0.45	0.001	-8.81378	Down	0.000443032	0.00050618
novel_mir37	11	0	0.45	0.001	-8.81378	Down	0.000443032	0.000505952
novel_mir2164	11	0	0.45	0.001	-8.81378	Down	0.000443032	0.000505725
novel_mir2210	11	0	0.45	0.001	-8.81378	Down	0.000443032	0.000505498
novel_mir1836	11	0	0.45	0.001	-8.81378	Down	0.000443032	0.000505271
novel_mir2587	11	0	0.45	0.001	-8.81378	Down	0.000443032	0.000505045
novel_mir4200	11	0	0.45	0.001	-8.81378	Down	0.000443032	0.000504818
novel_mir871	11	0	0.45	0.001	-8.81378	Down	0.000443032	0.000504592
novel_mir1053	11	0	0.45	0.001	-8.81378	Down	0.000443032	0.000504366
novel_mir2951	11	0	0.45	0.001	-8.81378	Down	0.000443032	0.00050414
novel_mir2115	10	0	0.41	0.001	-8.67948	Down	0.000893274	0.000999916
novel_mir2431	10	0	0.41	0.001	-8.67948	Down	0.000893274	0.000999476
novel_mir6160	10	0	0.41	0.001	-8.67948	Down	0.000893274	0.000999036
novel_mir1741	10	0	0.41	0.001	-8.67948	Down	0.000893274	0.000998596
mmu-miR-532-5p	1664	6	67.81	0.24	-8.14232	Down	0	0
novel_mir3598	1701	13	69.32	0.52	-7.05862	Down	0	0
novel_mir122	2905	27	118.38	1.08	-6.77625	Down	0	0
novel_mir2299	1240	13	50.53	0.52	-6.60248	Down	0	0
novel_mir99	1908	21	77.75	0.84	-6.53231	Down	0	0
mmu-miR-350-3p	267	3	10.88	0.12	-6.5025	Down	2.041e-76	1.89277e-75
novel_mir171	1324	15	53.95	0.6	-6.49052	Down	0	0
novel_mir3529	3408	39	138.88	1.56	-6.47615	Down	0	0
mmu-miR-130a-3p	248	3	10.11	0.12	-6.3966	Down	1.00363e-70	9.07557e-70
novel_mir5754	4667	67	190.18	2.69	-6.14362	Down	0	0
novel_mir4809	1512	22	61.61	0.88	-6.12952	Down	0	0
novel_mir3848	1348	20	54.93	0.8	-6.10145	Down	0	0
novel_mir87	15092	233	615	9.34	-6.04102	Down	0	0
novel_mir83	11957	191	487.25	7.66	-5.99117	Down	0	0
novel_mir340	2982	50	121.52	2	-5.92505	Down	0	0
mmu-miR-106b-5p	178	3	7.25	0.12	-5.91687	Down	7.87146e-50	5.65011e-49
novel_mir119	8490	149	345.97	5.97	-5.85677	Down	0	0
novel_mir3784	730	13	29.75	0.52	-5.83823	Down	2.01988e-199	3.35459e-198
novel_mir1282	4389	78	178.85	3.13	-5.83644	Down	0	0
novel_mir3502	3436	64	140.02	2.57	-5.76772	Down	0	0
mmu-miR-9b-3p	1408	28	57.38	1.12	-5.67898	Down	0	0
novel_mir4055	990	20	40.34	0.8	-5.65607	Down	1.50345e-266	3.03195e-265
novel_mir54	6870	140	279.95	5.61	-5.64102	Down	0	0
novel_mir768	626	13	25.51	0.52	-5.61641	Down	1.32483e-168	1.9347e-167
mmu-miR-8112	703	15	28.65	0.6	-5.57743	Down	1.30262e-188	2.06872e-187
novel_mir3797	1878	41	76.53	1.64	-5.54426	Down	0	0
novel_mir5762	10970	252	447.03	10.1	-5.46794	Down	0	0
novel_mir3666	3346	77	136.35	3.09	-5.46356	Down	0	0
mmu-miR-203b-3p	43	1	1.75	0.04	-5.45121	Down	1.84466e-12	4.26894e-12
novel_mir4164	1323	31	53.91	1.24	-5.44214	Down	0	0
novel_mir260	793	19	32.31	0.76	-5.40984	Down	9.12738e-210	1.57773e-208
novel_mir3494	2549	61	103.87	2.45	-5.40585	Down	0	0
novel_mir2597	827	20	33.7	0.8	-5.3966	Down	1.89398e-218	3.43757e-217
novel_mir1039	1110	27	45.23	1.08	-5.38818	Down	1.85043e-292	3.95121e-291
novel_mir3537	1449	36	59.05	1.44	-5.3578	Down	0	0
novel_mir3880	678	17	27.63	0.68	-5.34456	Down	1.41994e-178	2.16052e-177
novel_mir4149	988	25	40.26	1	-5.33128	Down	3.19692e-259	6.34639e-258
novel_mir916	468	12	19.07	0.48	-5.31213	Down	2.25518e-123	2.83684e-122
novel_mir226	577	15	23.51	0.6	-5.29217	Down	1.66451e-151	2.32391e-150
novel_mir12	761	20	31.01	0.8	-5.27659	Down	4.63904e-199	7.60503e-198
mmu-miR-34c-3p	152	4	6.19	0.16	-5.2738	Down	8.17762e-41	5.03132e-40
novel_mir3315	4160	110	169.52	4.41	-5.26453	Down	0	0
novel_mir3413	411	11	16.75	0.44	-5.25051	Down	6.2638e-108	7.04262e-107
novel_mir4093	1157	32	47.15	1.28	-5.20304	Down	8.67062e-300	1.89931e-298
novel_mir3309	1655	47	67.44	1.88	-5.1648	Down	0	0
novel_mir347	3531	103	143.89	4.13	-5.12268	Down	0	0
novel_mir3602	507	15	20.66	0.6	-5.10573	Down	5.15876e-131	6.72226e-130
novel_mir98	12771	380	520.42	15.24	-5.09374	Down	0	0
novel_mir187	49990	1527	2037.08	61.23	-5.05612	Down	0	0
novel_mir4389	897	28	36.55	1.12	-5.0283	Down	7.94052e-229	1.46209e-227
novel_mir855	1541	49	62.8	1.96	-5.00184	Down	0	0
novel_mir3703	314	10	12.8	0.4	-5	Down	8.02726e-81	7.55454e-80
novel_mir912	344	11	14.02	0.44	-4.99384	Down	2.34044e-88	2.35994e-87
novel_mir86	466	15	18.99	0.6	-4.98413	Down	4.5796e-119	5.5946e-118
mmu-miR-186-5p	123	4	5.01	0.16	-4.96867	Down	2.44676e-32	1.3034e-31
novel_mir133	8720	284	355.34	11.39	-4.96336	Down	0	0
novel_mir82	2409	79	98.17	3.17	-4.95273	Down	0	0
novel_mir3640	1123	37	45.76	1.48	-4.95042	Down	1.00217e-283	2.10456e-282
novel_mir3565	298	10	12.14	0.4	-4.92362	Down	3.5948e-76	3.3216e-75
novel_mir3438	3829	130	156.03	5.21	-4.9044	Down	0	0
novel_mir494	352	12	14.34	0.48	-4.90087	Down	1.68683e-89	1.71449e-88
mmu-miR-423-5p	753	26	30.68	1.04	-4.88264	Down	2.26718e-189	3.64614e-188
novel_mir3562	286	10	11.65	0.4	-4.86419	Down	1.08705e-72	9.93591e-72
novel_mir3410	394	14	16.06	0.56	-4.8419	Down	2.3975e-99	2.57048e-98
novel_mir140	3928	140	160.07	5.61	-4.83456	Down	0	0
novel_mir598	1882	67	76.69	2.69	-4.83336	Down	0	0
mmu-miR-193a-5p	28	1	1.14	0.04	-4.83289	Down	4.5993e-08	6.85042e-08
mmu-miR-200c-3p	28	1	1.14	0.04	-4.83289	Down	4.5993e-08	6.84641e-08
novel_mir237	2782	101	113.37	4.05	-4.80697	Down	0	0
novel_mir3927	328	12	13.37	0.48	-4.79982	Down	1.50394e-82	1.43666e-81
novel_mir3641	5254	195	214.1	7.82	-4.77497	Down	0	0
mmu-miR-144-3p	483	18	19.68	0.72	-4.77259	Down	1.70555e-120	2.12441e-119
novel_mir4105	1480	56	60.31	2.25	-4.7444	Down	0	0
novel_mir3476	2726	104	111.08	4.17	-4.73541	Down	0	0
novel_mir3677	1802	71	73.43	2.85	-4.68734	Down	0	0
novel_mir3579	3419	138	139.32	5.53	-4.65498	Down	0	0
novel_mir2065	1284	52	52.32	2.09	-4.64579	Down	0	0
novel_mir5220	264	11	10.76	0.44	-4.61203	Down	3.1741e-65	2.72479e-64
novel_mir111	234	10	9.54	0.4	-4.57592	Down	1.06166e-57	8.59135e-57
novel_mir5173	1360	60	55.42	2.41	-4.5233	Down	0	0
novel_mir3936	1012	45	41.24	1.8	-4.51798	Down	1.08218e-242	2.0521e-241
mmu-miR-203b-5p	22	1	0.9	0.04	-4.49185	Down	2.4918e-06	3.24701e-06
mmu-miR-1249-3p	22	1	0.9	0.04	-4.49185	Down	2.4918e-06	3.24534e-06
novel_mir363	5749	262	234.27	10.51	-4.47834	Down	0	0
novel_mir3770	559	26	22.78	1.04	-4.45311	Down	1.42163e-133	1.88144e-132
mmu-miR-148b-3p	43	2	1.75	0.08	-4.45121	Down	2.1862e-11	4.43701e-11
novel_mir235	236	11	9.62	0.44	-4.45046	Down	3.2366e-57	2.59439e-56
novel_mir5565	665	31	27.1	1.24	-4.44988	Down	1.58036e-158	2.24341e-157
mmu-miR-5126	1569	73	63.94	2.93	-4.44775	Down	0	0
novel_mir2476	209	10	8.52	0.4	-4.41278	Down	1.46283e-50	1.05598e-49
novel_mir316	206	10	8.39	0.4	-4.3906	Down	1.04292e-49	7.44397e-49
novel_mir279	795	39	32.4	1.56	-4.37638	Down	3.48092e-187	5.4938e-186
novel_mir3626	1554	77	63.33	3.09	-4.35721	Down	0	0
novel_mir4358	700	35	28.52	1.4	-4.34848	Down	2.45202e-164	3.50033e-163
novel_mir106	2893	145	117.89	5.81	-4.34276	Down	0	0
novel_mir3847	556	28	22.66	1.12	-4.33858	Down	1.17189e-130	1.51928e-129
mmu-miR-486b-3p	1929	97	78.61	3.89	-4.33687	Down	0	0
novel_mir3553	2848	144	116.06	5.77	-4.33016	Down	0	0
novel_mir4140	451	23	18.38	0.92	-4.32036	Down	5.4934e-106	6.06901e-105
novel_mir3630	40551	2065	1652.44	82.8	-4.31882	Down	0	0
mmu-miR-212-3p	78	4	3.18	0.16	-4.31288	Down	2.17436e-19	7.57894e-19
novel_mir81	10719	549	436.8	22.01	-4.31074	Down	0	0
novel_mir3609	6514	334	265.44	13.39	-4.30916	Down	0	0
novel_mir215	1531	79	62.39	3.17	-4.29876	Down	0	0
novel_mir3379	32236	1673	1313.61	67.08	-4.29151	Down	0	0
novel_mir5233	474	25	19.32	1	-4.27202	Down	1.75056e-110	2.0219e-109
mmu-miR-99b-3p	112	6	4.56	0.24	-4.24793	Down	4.6229e-27	2.15934e-26
novel_mir475	385	21	15.69	0.84	-4.22331	Down	2.42966e-89	2.45967e-88
mmu-miR-154-5p	564	31	22.98	1.24	-4.21197	Down	6.36334e-130	8.20774e-129
mmu-miR-466h-3p	18	1	0.73	0.04	-4.18982	Down	3.4589e-05	4.18328e-05
mmu-miR-15a-3p	18	1	0.73	0.04	-4.18982	Down	3.4589e-05	4.18129e-05
novel_mir3926	212	12	8.64	0.48	-4.16993	Down	2.00568e-49	1.41568e-48
novel_mir3857	944	54	38.47	2.17	-4.14797	Down	2.75036e-214	4.88718e-213
novel_mir1160	259	15	10.55	0.6	-4.13614	Down	9.65856e-60	7.9169e-59
novel_mir4964	189	11	7.7	0.44	-4.12928	Down	6.33746e-44	4.08718e-43
mmu-miR-15b-3p	68	4	2.77	0.16	-4.11374	Down	1.44046e-16	4.44739e-16
novel_mir3480	2199	130	89.61	5.21	-4.1043	Down	0	0
novel_mir4265	927	55	37.78	2.21	-4.0955	Down	1.44097e-208	2.45739e-207
novel_mir345	184	11	7.5	0.44	-4.09132	Down	1.59175e-42	1.00864e-41
novel_mir3985	22996	1375	937.08	55.13	-4.08726	Down	0	0
novel_mir3540	734	44	29.91	1.76	-4.08698	Down	4.54194e-165	6.55743e-164
novel_mir3844	196	12	7.99	0.48	-4.05709	Down	6.06094e-45	3.96929e-44
novel_mir233	224	14	9.13	0.56	-4.02712	Down	6.72378e-51	4.88146e-50
novel_mir2123	157	10	6.4	0.4	-4	Down	6.44324e-36	3.6627e-35
novel_mir3496	496	32	20.21	1.28	-3.98085	Down	5.7788e-110	6.58472e-109
mmu-miR-34b-3p	61	4	2.49	0.16	-3.96	Down	1.30047e-14	3.53044e-14
novel_mir3704	1599	106	65.16	4.25	-3.93845	Down	0	0
mmu-miR-155-5p	30	2	1.22	0.08	-3.93074	Down	1.03328e-07	1.4668e-07
novel_mir4935	266	18	10.84	0.72	-3.91222	Down	6.35276e-59	5.17383e-58
mmu-miR-142a-5p	118	8	4.81	0.32	-3.90989	Down	6.85062e-27	3.16499e-26
mmu-miR-574-5p	44	3	1.79	0.12	-3.89885	Down	9.32738e-11	1.78068e-10
mmu-let-7d-3p	3651	250	148.78	10.02	-3.89223	Down	0	0
mmu-miR-301a-3p	174	12	7.09	0.48	-3.88468	Down	7.75526e-39	4.63673e-38
novel_mir5466	1451	100	59.13	4.01	-3.88222	Down	0	0
novel_mir3547	474	33	19.32	1.32	-3.87149	Down	5.5629e-103	6.04074e-102
novel_mir91	1239	86	50.49	3.45	-3.87133	Down	1.07807e-266	2.1915e-265
novel_mir1352	1135	79	46.25	3.17	-3.8669	Down	2.89726e-244	5.53529e-243
novel_mir4874	23674	1671	964.71	67	-3.84786	Down	0	0
novel_mir468	18287	1293	745.19	51.85	-3.84519	Down	0	0
novel_mir1909	140	10	5.7	0.4	-3.83289	Down	3.2574e-31	1.68233e-30
novel_mir85	319	23	13	0.92	-3.82073	Down	4.02814e-69	3.56638e-68
novel_mir232	5544	401	225.92	16.08	-3.81247	Down	0	0
novel_mir802	419	31	17.07	1.24	-3.78305	Down	1.27443e-89	1.30053e-88
mmu-miR-5114	27	2	1.1	0.08	-3.78136	Down	7.0222e-07	9.53683e-07
mmu-miR-361-5p	27	2	1.1	0.08	-3.78136	Down	7.0222e-07	9.53174e-07
mmu-miR-374b-5p	297	22	12.1	0.88	-3.78136	Down	5.93856e-64	4.96378e-63
novel_mir1920	537	40	21.88	1.6	-3.77347	Down	3.55016e-114	4.19579e-113
novel_mir1516	214	16	8.72	0.64	-3.76818	Down	2.29768e-46	1.56526e-45
novel_mir3477	993	74	40.46	2.97	-3.76796	Down	1.15918e-209	1.99018e-208
novel_mir1685	198	15	8.07	0.6	-3.74953	Down	7.71478e-43	4.93785e-42
mmu-miR-126a-5p	78	6	3.18	0.24	-3.72792	Down	1.34908e-17	4.31739e-17
novel_mir3903	155	12	6.32	0.48	-3.71882	Down	1.26843e-33	6.87223e-33
novel_mir4978	129	10	5.26	0.4	-3.71699	Down	3.36098e-28	1.6392e-27
mmu-miR-17-5p	103	8	4.2	0.32	-3.71425	Down	9.08202e-23	3.68649e-22
mmu-miR-194-5p	38	3	1.55	0.12	-3.69116	Down	4.20058e-09	6.81588e-09
novel_mir3850	3200	253	130.4	10.14	-3.68481	Down	0	0
novel_mir5251	307	25	12.51	1	-3.64501	Down	3.68492e-64	3.09022e-63
novel_mir3845	1540	126	62.75	5.05	-3.63526	Down	0	0
novel_mir3828	169	14	6.89	0.56	-3.62101	Down	8.81226e-36	4.98707e-35
mmu-miR-29b-3p	24	2	0.98	0.08	-3.61471	Down	4.6808e-06	5.94696e-06
mmu-miR-124-3p	35	3	1.43	0.12	-3.57491	Down	2.75782e-08	4.11971e-08
novel_mir1204	257	22	10.47	0.88	-3.57261	Down	4.3451e-53	3.26654e-52
novel_mir3840	1205	104	49.1	4.17	-3.5576	Down	2.936e-242	5.5262e-241
novel_mir2764	472	41	19.23	1.64	-3.55159	Down	1.00416e-95	1.06315e-94
novel_mir398	115	10	4.69	0.4	-3.55152	Down	2.09144e-24	8.79859e-24
novel_mir433	1633	142	66.54	5.69	-3.54772	Down	0	0
mmu-miR-20a-5p	159	14	6.48	0.56	-3.5325	Down	4.3667e-33	2.3508e-32
novel_mir2	464	41	18.91	1.64	-3.52738	Down	1.40605e-93	1.46425e-92
novel_mir4019	113	10	4.6	0.4	-3.52356	Down	7.21274e-24	2.9947e-23
novel_mir3779	1089	98	44.38	3.93	-3.49731	Down	6.22122e-216	1.11325e-214
novel_mir3979	273	25	11.12	1	-3.47508	Down	5.1224e-55	3.99264e-54
novel_mir94	914	84	37.25	3.37	-3.46642	Down	3.71122e-180	5.71528e-179
novel_mir201	967	89	39.41	3.57	-3.46457	Down	2.11986e-190	3.43093e-189
novel_mir108	17017	1580	693.44	63.35	-3.45235	Down	0	0
novel_mir1125	610	57	24.86	2.29	-3.44041	Down	4.36048e-120	5.37863e-119
novel_mir130	287	27	11.7	1.08	-3.43741	Down	3.29774e-57	2.63508e-56
novel_mir271	2798	265	114.02	10.63	-3.42307	Down	0	0
mmu-miR-138-5p	189	18	7.7	0.72	-3.41879	Down	5.16294e-38	3.03681e-37
novel_mir5947	125	12	5.09	0.48	-3.40656	Down	1.5268e-25	6.67744e-25
novel_mir3873	928	89	37.82	3.57	-3.40515	Down	4.8645e-180	7.4462e-179
novel_mir4067	772	74	31.46	2.97	-3.40498	Down	4.22864e-150	5.83966e-149
novel_mir3607	6973	674	284.15	27.03	-3.39402	Down	0	0
novel_mir3738	134	13	5.46	0.52	-3.39232	Down	3.50638e-27	1.64386e-26
novel_mir1489	133	13	5.42	0.52	-3.38171	Down	6.4537e-27	2.98704e-26
novel_mir4034	450	44	18.34	1.76	-3.38135	Down	1.52647e-87	1.51514e-86
novel_mir3601	171	17	6.97	0.68	-3.35755	Down	5.38218e-34	2.94744e-33
novel_mir5389	160	16	6.52	0.64	-3.34873	Down	7.86174e-32	4.12741e-31
novel_mir1380	99	10	4.03	0.4	-3.33271	Down	3.85318e-20	1.3829e-19
novel_mir1798	497	51	20.25	2.04	-3.31128	Down	9.84682e-95	1.03821e-93
novel_mir1575	1687	173	68.74	6.94	-3.30814	Down	0	0
novel_mir451	136	14	5.54	0.56	-3.30639	Down	5.66026e-27	2.62938e-26
novel_mir5803	46739	4812	1904.6	192.95	-3.30319	Down	0	0
mmu-miR-425-3p	661	68	26.94	2.73	-3.30278	Down	2.60104e-125	3.30462e-124
mmu-miR-193b-3p	874	90	35.62	3.61	-3.30262	Down	4.59758e-165	6.60025e-164
novel_mir5745	298	31	12.14	1.24	-3.29136	Down	3.89546e-57	3.10294e-56
novel_mir650	96	10	3.91	0.4	-3.2891	Down	2.37402e-19	8.26354e-19
mmu-miR-92a-3p	13753	1435	560.43	57.54	-3.2839	Down	0	0
novel_mir50	103	11	4.2	0.44	-3.25481	Down	1.79404e-20	6.51235e-20
novel_mir1714	168	18	6.85	0.72	-3.25004	Down	1.75279e-32	9.3765e-32
novel_mir3697	130	14	5.3	0.56	-3.24249	Down	2.1097e-25	9.21091e-25
novel_mir3948	342	37	13.94	1.48	-3.23556	Down	2.54968e-64	2.14528e-63
novel_mir5247	120	13	4.89	0.52	-3.23325	Down	1.68725e-23	6.97121e-23
novel_mir3670	184	20	7.5	0.8	-3.22882	Down	3.08926e-35	1.72903e-34
novel_mir1589	101	11	4.12	0.44	-3.22707	Down	5.97232e-20	2.13141e-19
novel_mir1086	3230	351	131.62	14.07	-3.22568	Down	0	0
novel_mir3914	672	73	27.38	2.93	-3.22415	Down	1.39723e-124	1.76634e-123
novel_mir127	6761	739	275.51	29.63	-3.21697	Down	0	0
novel_mir3919	208	23	8.48	0.92	-3.20436	Down	2.29102e-39	1.3795e-38
mmu-miR-501-3p	63	7	2.57	0.28	-3.19827	Down	7.91844e-13	1.87694e-12
novel_mir1129	117	13	4.77	0.52	-3.19741	Down	1.01875e-22	4.12203e-22
novel_mir1640	144	16	5.87	0.64	-3.19722	Down	1.21291e-27	5.79325e-27
mmu-miR-339-3p	54	6	2.2	0.24	-3.1964	Down	3.60916e-11	7.30747e-11
novel_mir5596	108	12	4.4	0.48	-3.1964	Down	4.48474e-21	1.68079e-20
novel_mir193	3220	360	131.21	14.44	-3.18374	Down	0	0
mmu-miR-15b-5p	123	14	5.01	0.56	-3.16131	Down	1.3907e-23	5.76471e-23
novel_mir6	3601	410	146.74	16.44	-3.15798	Down	0	0
novel_mir2881	96	11	3.91	0.44	-3.15159	Down	1.18789e-18	3.99262e-18
novel_mir3251	464	53	18.91	2.13	-3.15022	Down	9.98678e-85	9.64882e-84
novel_mir4515	1677	192	68.34	7.7	-3.1498	Down	2.64788e-301	5.85066e-300
novel_mir359	638	73	26	2.93	-3.14954	Down	8.8208e-116	1.04737e-114
novel_mir4500	256	30	10.43	1.2	-3.11963	Down	6.15026e-47	4.21235e-46
mmu-miR-133a-3p	269	32	10.96	1.28	-3.09803	Down	6.3883e-49	4.48416e-48
novel_mir577	100	12	4.07	0.48	-3.08392	Down	5.22036e-19	1.80475e-18
novel_mir3384	158	19	6.44	0.76	-3.08299	Down	3.29882e-29	1.65006e-28
novel_mir357	1638	198	66.75	7.94	-3.07156	Down	3.14472e-287	6.65894e-286
novel_mir5931	764	93	31.13	3.73	-3.06106	Down	1.61452e-134	2.1479e-133
novel_mir1956	98	12	3.99	0.48	-3.05528	Down	1.69797e-18	5.69954e-18
novel_mir1443	81	10	3.3	0.4	-3.04439	Down	1.83873e-15	5.26744e-15
novel_mir3492	186	23	7.58	0.92	-3.04249	Down	1.04174e-33	5.65614e-33
mmu-miR-434-3p	97	12	3.95	0.48	-3.04075	Down	3.05748e-18	1.00766e-17
novel_mir4193	2862	354	116.63	14.19	-3.03899	Down	0	0
novel_mir3479	274	34	11.17	1.36	-3.03795	Down	7.2316e-49	5.04821e-48
novel_mir2101	258	32	10.51	1.28	-3.03755	Down	4.10338e-46	2.77306e-45
novel_mir118	136	17	5.54	0.68	-3.02628	Down	6.51538e-25	2.79655e-24
novel_mir2779	79	10	3.22	0.4	-3.00899	Down	5.94954e-15	1.64145e-14
novel_mir2379	686	87	27.95	3.49	-3.00155	Down	1.15314e-118	1.40197e-117
mmu-miR-9-3p	39	5	1.59	0.2	-2.99095	Down	5.91842e-08	8.63797e-08
mmu-miR-339-5p	31	4	1.26	0.16	-2.97728	Down	1.54385e-06	2.0496e-06
novel_mir5262	557	72	22.7	2.89	-2.97355	Down	8.53322e-96	9.07235e-95
novel_mir604	77	10	3.14	0.4	-2.97269	Down	1.91486e-14	5.19281e-14
novel_mir1242	246	32	10.02	1.28	-2.96867	Down	4.4768e-43	2.87261e-42
mmu-miR-149-5p	590	77	24.04	3.09	-2.95976	Down	6.72312e-101	7.26955e-100
novel_mir3543	1522	199	62.02	7.98	-2.95827	Down	3.3485e-257	6.59577e-256
novel_mir448	99	13	4.03	0.52	-2.9542	Down	4.1723e-18	1.37152e-17
mmu-miR-15a-5p	760	100	30.97	4.01	-2.9492	Down	5.97346e-129	7.66594e-128
mmu-miR-221-3p	30	4	1.22	0.16	-2.93074	Down	2.77782e-06	3.6123e-06
mmu-miR-30e-5p	30	4	1.22	0.16	-2.93074	Down	2.77782e-06	3.61046e-06
novel_mir178	149	20	6.07	0.8	-2.92362	Down	2.79058e-26	1.25725e-25
mmu-miR-320-3p	1037	139	42.26	5.57	-2.92354	Down	1.1229e-173	1.6784e-172
novel_mir3651	81	11	3.3	0.44	-2.90689	Down	7.94024e-15	2.18593e-14
mmu-miR-27a-3p	16108	2190	656.4	87.81	-2.90212	Down	0	0
novel_mir172	95	13	3.87	0.52	-2.89575	Down	4.224e-17	1.32182e-16
mmu-miR-322-3p	51	7	2.08	0.28	-2.89308	Down	9.41098e-10	1.63119e-09
novel_mir183	274	38	11.17	1.52	-2.87749	Down	2.52118e-46	1.70835e-45
mmu-miR-26b-5p	744	103	30.32	4.13	-2.87606	Down	4.48434e-123	5.61316e-122
novel_mir132	72	10	2.93	0.4	-2.87283	Down	3.4707e-13	8.46358e-13
mmu-miR-205-5p	143	20	5.83	0.8	-2.86542	Down	8.79554e-25	3.75621e-24
novel_mir639	3050	426	124.29	17.08	-2.86333	Down	0	0
mmu-miR-322-5p	107	15	4.36	0.6	-2.86129	Down	7.15906e-19	2.43523e-18
novel_mir3360	393	55	16.01	2.21	-2.85686	Down	1.90207e-65	1.63836e-64
mmu-miR-466i-5p	92	13	3.75	0.52	-2.85031	Down	2.36758e-16	7.17047e-16
novel_mir3399	77	11	3.14	0.44	-2.83519	Down	7.91926e-14	2.066e-13
novel_mir395	287	41	11.7	1.64	-2.83474	Down	1.01731e-47	7.06277e-47
novel_mir4269	4277	612	174.29	24.54	-2.82828	Down	0	0
novel_mir3749	285	41	11.61	1.64	-2.8236	Down	3.17132e-47	2.18383e-46
mmu-miR-92b-3p	731	105	29.79	4.21	-2.82294	Down	1.22557e-118	1.48293e-117
novel_mir1863	221	32	9.01	1.28	-2.81538	Down	7.66504e-37	4.42656e-36
novel_mir711	742	108	30.24	4.33	-2.80402	Down	1.52147e-119	1.86766e-118
mmu-miR-196a-5p	89	13	3.63	0.52	-2.80339	Down	1.31198e-15	3.77547e-15
novel_mir3348	68	10	2.77	0.4	-2.79181	Down	3.42634e-12	7.63713e-12
novel_mir1762	135	20	5.5	0.8	-2.78136	Down	8.35748e-23	3.39782e-22
novel_mir7	154	23	6.28	0.92	-2.77106	Down	1.052e-25	4.69797e-25
[truncated: 206 more rows]

## Sheet: model vs. fruit juice groups
miRNA id	Count(JM5)	Count(JN1)	TPM(JM5)	TPM(JN1)	log2 Ratio(JN1/JM5)	Up-Down-Regulation(JN1/JM5)	P-value	FDR
novel_mir111	0	1803	0.001	63.89	15.9633	Up	0	0
novel_mir1956	0	1498	0.001	53.08	15.6959	Up	0	0
novel_mir3065	0	1371	0.001	48.58	15.5681	Up	7.66078e-286	3.32268e-284
novel_mir4385	0	1210	0.001	42.88	15.388	Up	2.38262e-252	9.41135e-251
novel_mir12	0	1139	0.001	40.36	15.3006	Up	1.40335e-237	5.39861e-236
novel_mir4067	0	1098	0.001	38.91	15.2479	Up	4.7466e-229	1.73545e-227
novel_mir723	0	1008	0.001	35.72	15.1244	Up	2.50644e-210	8.80039e-209
novel_mir176	0	976	0.001	34.59	15.0781	Up	1.13765e-203	3.90151e-202
novel_mir3688	0	967	0.001	34.27	15.0647	Up	8.47762e-202	2.885e-200
novel_mir711	0	943	0.001	33.42	15.0284	Up	8.33656e-197	2.73192e-195
novel_mir4850	0	834	0.001	29.55	14.8509	Up	3.94662e-174	1.18774e-172
[truncated: 3,822 more rows]

## Sheet: model vs positive control
miRNA id	Count(JM5)	Count(JQ9)	TPM(JM5)	TPM(JQ9)	log2 Ratio(JQ9/JM5)	Up-Down-Regulation(JQ9/JM5)	P-value	FDR
[truncated: 1,635 more rows]

[truncated: 1 more sheets: fruit juice vs positive control]
