# Supplementary material for: MicroRNAs Involved in the Therapeutic Functions of Noni (Morinda citrifolia L.) Fruit Juice in the Treatment of Acute Gouty Arthritis in Mice Induced with Monosodium Urate
Source: Foods. 2021 Jul 15;10(7):1638. doi: 10.3390/foods10071638 (PMC8308103; doi:10.3390/foods10071638)
Supplement: Supplementary file 1 [file foods-10-01638-s001.zip › Table S4.xlsx]

## Sheet: All four groups
GeneID	miRNA	TargetScan site type	TargetScan NA	miRanda MEF	miRanda score	Symbol	GO term	Pathway	NR id	NR evalue	NR description
NM_172804.2	novel_mir700,novel_mir392,novel_mir3512,novel_mir4501,novel_mir3091,novel_mir3627,mmu-miR-92a-1-5p,novel_mir3029,novel_mir1042,novel_mir1681,novel_mir4183,novel_mir1259,novel_mir592,novel_mir5277,novel_mir5130,novel_mir2378,novel_mir5838,novel_mir1770,mmu-miR-30c-2-3p,novel_mir2308,novel_mir808,novel_mir1238,novel_mir3385,novel_mir4089,novel_mir297,mmu-miR-674-5p,novel_mir3949,novel_mir1235,novel…	7mer-m8	NA	-23.4	160	Syt16	-	K19328|1|0.0e+00|1104.7|mmu:238266|synaptotagmin-14/16	-	-	-
NM_020594.2	novel_mir782,novel_mir1426,novel_mir3434,novel_mir2442,novel_mir2164,mmu-miR-148a-3p,novel_mir823,novel_mir3753,novel_mir4045,novel_mir4697,novel_mir5450,novel_mir5145,novel_mir5888,novel_mir78,novel_mir4355,novel_mir4718,novel_mir123,novel_mir4223,novel_mir470,novel_mir1828,novel_mir573,novel_mir283,novel_mir864,novel_mir83,novel_mir346,novel_mir384,novel_mir4831,novel_mir4251,novel_mir197,novel…	7mer-m8	NA	-28.93	163	Zc3h8	GO:0015030,GO:0008023,GO:0035363,GO:0035327,GO:0001162,GO:0001227,GO:0046872,GO:0033085,GO:0043029,GO:0000122,GO:0042796,GO:0045945,GO:0046677,GO:0042795,GO:0070245,	K14404|1|5.8e-07|60.1|rss:109451887|cleavage and polyadenylation specificity factor subunit 4!K15687|2|5.8e-07|60.1|mmu:67027|E3 ubiquitin-protein ligase makorin [EC:2.3.2.27]	gi|85719326|ref|NP_065619.2|	0	zinc finger CCCH domain-containing protein 8 [Mus musculus]
NM_009776.3	novel_mir1733,novel_mir252,novel_mir6091,novel_mir221,novel_mir4507,novel_mir4559,novel_mir253,novel_mir3546,mmu-miR-140-5p,novel_mir52,novel_mir2179,novel_mir773,novel_mir1648,novel_mir4900,novel_mir5263,novel_mir3991,novel_mir295,novel_mir3744,novel_mir6065,novel_mir5582,novel_mir5678,novel_mir300,mmu-miR-700-5p,novel_mir4612,novel_mir2140,mmu-miR-15b-5p,novel_mir835,novel_mir199,mmu-miR-34b-5p…	6mer	NA	-24.57	160	Serping1	GO:0072562,GO:0070062,GO:0004867,GO:0001848,GO:0001869,GO:0010951,GO:0007568,GO:0042730,GO:0006958,	K04001|1|4.5e-290|1000.7|mmu:12258|C1 inhibitor	gi|163914390|ref|NP_033906.2|	0	plasma protease C1 inhibitor precursor [Mus musculus]
NM_009298.3	novel_mir1920,novel_mir5104,novel_mir604,novel_mir3416,novel_mir5076,novel_mir382,novel_mir247,novel_mir4959,novel_mir2971,novel_mir559,novel_mir3657,novel_mir4018,novel_mir1072,novel_mir922,novel_mir952,novel_mir2303,novel_mir926,novel_mir2490,novel_mir2147,novel_mir2493,mmu-miR-342-5p,novel_mir5183,novel_mir3264,novel_mir1030,novel_mir140,novel_mir2019,novel_mir4655,novel_mir192,novel_mir566,no…	6mer	NA	-24.22	156	Surf6	GO:0001652,GO:0005654,GO:0003677,GO:0042255,	K18626|1|7.9e-14|83.6|ola:101157556|trichohyalin	gi|6678185|ref|NP_033324.1|	0	surfeit locus protein 6 [Mus musculus]
NM_019684.2	novel_mir5780,novel_mir5618,novel_mir1490,mmu-miR-214-3p,novel_mir1359,novel_mir4919,novel_mir1150,novel_mir4361,novel_mir5646,novel_mir2310,novel_mir3866,novel_mir3707,novel_mir2048,novel_mir4685,novel_mir1641,novel_mir5819,novel_mir4032,novel_mir725,novel_mir4954,novel_mir836,novel_mir2905,novel_mir4672,novel_mir1380,mmu-miR-543-5p,novel_mir2303,novel_mir2808,novel_mir1346,novel_mir3068,novel_m…	7mer-m8	NA	-27.82	160	Srpk3	GO:0005524,GO:0004674,GO:0030154,GO:0007519,GO:0006468,	K08832|1|0.0e+00|1154.8|mmu:56504|serine/threonine-protein kinase SRPK3 [EC:2.7.11.1]	gi|9790111|ref|NP_062658.1|	0	SRSF protein kinase 3 [Mus musculus]
XM_006506437.3	novel_mir1681,novel_mir5792,novel_mir3355,novel_mir2109,novel_mir4819,novel_mir1371,novel_mir2990,novel_mir85,novel_mir1339,novel_mir5615,novel_mir4792,novel_mir5760,novel_mir5262,novel_mir1062,novel_mir511,novel_mir2378,novel_mir717,novel_mir4535,novel_mir4703,novel_mir188,novel_mir5680,novel_mir2766,novel_mir920,novel_mir374,novel_mir2012,novel_mir1769,novel_mir3524,mmu-miR-466i-5p,novel_mir832…	7mer-1a	NA	-20.29	149	Rad18	-	K10627|1|1.2e-196|690.6|mmu:58186|E3 ubiquitin-protein ligase RAD18 [EC:2.3.2.27]	gi|568942520|ref|XP_006506499.1|	0	PREDICTED: E3 ubiquitin-protein ligase RAD18 isoform X3 [Mus musculus]
NM_030096.2	novel_mir5126,novel_mir234,novel_mir243,novel_mir2508,novel_mir5318,novel_mir2332,novel_mir2718,novel_mir2154,novel_mir2348,novel_mir4925,novel_mir4954,novel_mir3436,novel_mir3096,novel_mir552,novel_mir999,novel_mir2490,novel_mir3245,novel_mir4597,novel_mir1049,novel_mir3610,novel_mir323,novel_mir5291,novel_mir169,novel_mir2064,novel_mir3661,novel_mir2371,novel_mir252,novel_mir2307,novel_mir2250,…	8mer-1a	NA	-21.66	154	Ddx52	GO:0005730,GO:0016020,GO:0004004,GO:0005524,GO:0010501,GO:0006364,	K14779|1|0.0e+00|1180.6|mmu:78394|ATP-dependent RNA helicase DDX52/ROK1 [EC:3.6.4.13]	gi|256985213|ref|NP_084372.2|	0	probable ATP-dependent RNA helicase DDX52 [Mus musculus]
XM_006535597.3	novel_mir401,novel_mir4199,novel_mir2337,novel_mir4907,novel_mir5984,novel_mir3912,novel_mir2773,novel_mir5761,novel_mir137,mmu-miR-199b-5p,novel_mir1085,novel_mir789,novel_mir1586,novel_mir2302,novel_mir1623,novel_mir1559,novel_mir5507,novel_mir3685,novel_mir5101,novel_mir2706,novel_mir3682,novel_mir879,novel_mir5995,novel_mir2759,novel_mir2808,novel_mir2671,novel_mir4049,novel_mir49,novel_mir17…	6mer	NA	-37.37	168	Brox	GO:0070062,GO:0016020,	K12200|1|1.2e-12|80.1|lgi:LOTGIDRAFT_207048|programmed cell death 6-interacting protein!K18040|2|9.8e-12|77.0|adf:107345519|tyrosine-protein phosphatase non-receptor type 23 [EC:3.1.3.48]	gi|58037255|ref|NP_082137.1|	0	BRO1 domain-containing protein BROX [Mus musculus]
NM_030063.2	novel_mir5514,novel_mir1909,novel_mir5811,novel_mir5262,novel_mir5268	8mer-1a	NA	-28.07	172	Acbd7	-	K08762|1|9.2e-26|120.9|lco:104923049|diazepam-binding inhibitor (GABA receptor modulator, acyl-CoA-binding protein)	gi|164414722|ref|NP_084339.1|	9.39477e-58	acyl-CoA-binding domain-containing protein 7 [Mus musculus]
NM_007494.3	novel_mir646,novel_mir180,novel_mir2865,novel_mir5770,novel_mir4149,novel_mir310,novel_mir2298,novel_mir1314,novel_mir2600,novel_mir2342,novel_mir297,novel_mir5798,novel_mir4089,novel_mir171,novel_mir487,novel_mir102,novel_mir2275,novel_mir5982,novel_mir4661,novel_mir1077,novel_mir912,novel_mir5343,novel_mir1304,mmu-miR-30c-2-3p,novel_mir1218,novel_mir1770,novel_mir1166,novel_mir330,novel_mir149,…	7mer-1a	NA	-60.1	324	Ass1	GO:0070852,GO:0005764,GO:0043209,GO:0005741,GO:0070062,GO:0005783,GO:0005634,GO:0043204,GO:0015643,GO:0016597,GO:0042802,GO:0004055,GO:0005524,GO:1903038,GO:0000050,GO:0010046,GO:0051384,GO:0006526,GO:0006531,GO:0010043,GO:0045429,GO:0000052,GO:0000053,GO:0071499,	K01940|1|1.4e-239|832.8|mmu:11898|argininosuccinate synthase [EC:6.3.4.5]	gi|6996911|ref|NP_031520.1|	0	argininosuccinate synthase [Mus musculus]
XM_006495563.3	novel_mir3376,novel_mir74,novel_mir673,novel_mir2062,novel_mir1856,novel_mir3977,mmu-miR-1981-5p,novel_mir653,novel_mir520,novel_mir2378,novel_mir5864,novel_mir1649,novel_mir802,novel_mir729,novel_mir4792,novel_mir21,novel_mir2648,novel_mir2757,novel_mir450,novel_mir2462,novel_mir5579,novel_mir5536,novel_mir4692,novel_mir1907,novel_mir1277,novel_mir280,novel_mir1165,novel_mir1257,novel_mir1530,no…	7mer-m8	NA	-22.82	140	Tceb1	GO:0070449,GO:0005829,GO:0030891,GO:0003746,GO:0004842,GO:0032403,GO:0032968,GO:0042787,GO:0006414,GO:0061418,GO:0016032,	K03872|1|6.2e-59|233.0|sasa:106579736|elongin-C	gi|882939105|ref|NP_001297399.1|	3.15101e-95	transcription elongation factor B polypeptide 1 isoform 1 [Mus musculus]
NM_001128151.1	novel_mir75,novel_mir4027,novel_mir349,novel_mir1369,novel_mir1780,novel_mir558,novel_mir2207,novel_mir439,novel_mir5197,novel_mir5485,novel_mir428,novel_mir3870,novel_mir1289,novel_mir1321,novel_mir418,novel_mir5833,novel_mir2286,novel_mir1011,mmu-miR-3057-5p,novel_mir322,novel_mir1253,novel_mir2840,novel_mir2337,novel_mir131,novel_mir5596,mmu-miR-8091,novel_mir5382,novel_mir3255,novel_mir2420,n…	7mer-m8	NA	-21.91	154	Cecr2	-	K11722|1|1.3e-18|101.3|tmu:101358690|bromodomain-containing protein 4!K06062|4|1.7e-18|100.9|myi:110460610|histone acetyltransferase [EC:2.3.1.48]	gi|755516985|ref|XP_011239698.1|	0	PREDICTED: cat eye syndrome critical region protein 2 isoform X2 [Mus musculus]
NM_008287.3	novel_mir167,novel_mir602,novel_mir2871,novel_mir3990,novel_mir2061,novel_mir2560,novel_mir5594,novel_mir4507,novel_mir833,novel_mir1353,novel_mir318,novel_mir1373,novel_mir4459,novel_mir1002,novel_mir2535,novel_mir4255,novel_mir4976,novel_mir986,novel_mir3329,novel_mir5888,novel_mir2443,novel_mir2562	6mer	NA	-28.03	165	Rida	GO:0005777,GO:0005829,GO:0070062,GO:0005634,GO:0005739,GO:0046914,GO:1904012,GO:0036041,GO:0042578,GO:0044824,GO:1904013,GO:0016892,GO:0042803,GO:0043765,GO:0030324,GO:0017148,GO:0001822,GO:1902074,GO:0090502,GO:0007420,GO:0070314,GO:0050680,GO:0033993,	K09022|1|4.8e-68|262.3|mmu:15473|2-iminobutanoate/2-iminopropanoate deaminase [EC:3.5.99.10]	gi|40807498|ref|NP_032313.2|	1.45028e-93	ribonuclease UK114 [Mus musculus]
NM_172711.3	novel_mir749,novel_mir4348,novel_mir4936,mmu-miR-370-3p,novel_mir1763,novel_mir4621,novel_mir5512,novel_mir5239,novel_mir5584,novel_mir4518,novel_mir4820,novel_mir233,novel_mir1656,novel_mir3280,novel_mir1371,novel_mir5271,mmu-miR-21a-3p,novel_mir3718,novel_mir884,novel_mir1541,novel_mir5540,novel_mir3332,novel_mir2755,novel_mir4285,mmu-miR-300-5p,novel_mir3512,novel_mir4501,novel_mir4333,novel_m…	8mer-1a	NA	-20.22	145	Guf1	GO:0005743,GO:0003924,GO:0005525,GO:0006412,	K21594|1|0.0e+00|1274.6|mmu:231279|translation factor GUF1, mitochondrial [EC:3.6.5.-]	gi|27370038|ref|NP_766299.1|	0	translation factor Guf1, mitochondrial isoform 1 [Mus musculus]
NM_033608.3	novel_mir666,novel_mir5557,novel_mir4749,novel_mir4895,novel_mir3571,novel_mir945,mmu-miR-7051-5p,novel_mir253,novel_mir3721,novel_mir3917,novel_mir5701,novel_mir2158,novel_mir819,mmu-let-7b-5p,mmu-miR-532-3p,novel_mir3866,novel_mir5008,novel_mir2309,novel_mir3872,novel_mir131,novel_mir4260,novel_mir2183,novel_mir5382,novel_mir4615,mmu-miR-191-3p,novel_mir3058,novel_mir2225,novel_mir597,mmu-miR-3…	7mer-m8	NA	-28.3	157	Igsf9	GO:0030425,GO:0030054,GO:0005886,GO:0060077,GO:0030424,GO:0016021,GO:0098632,GO:0050807,GO:0016358,GO:0007156,	K22655|1|0.0e+00|2419.0|mmu:93842|immunoglobulin superfamily member 9	gi|568911303|ref|XP_006497121.1|	0	PREDICTED: protein turtle homolog A isoform X3 [Mus musculus]
NM_001115130.1	novel_mir94,novel_mir118,novel_mir6071,novel_mir357,novel_mir6,novel_mir918,novel_mir3044,mmu-miR-497a-5p,mmu-miR-181d-3p,novel_mir4718,novel_mir3733,novel_mir2430,novel_mir971,novel_mir5952,novel_mir4618,novel_mir2474,novel_mir1448,mmu-miR-212-3p,novel_mir4386,novel_mir3541,novel_mir1385,novel_mir5164,novel_mir2954,novel_mir346,novel_mir1506,novel_mir1096,novel_mir5754,novel_mir2337,novel_mir837…	8mer-1a	NA	-25.21	159	Zbtb44	GO:0005634,GO:0046872,GO:0003677,GO:0006355,	K10515|1|3.0e-262|910.6|mmu:235132|zinc finger and BTB domain-containing protein 44	gi|169646141|ref|NP_001108602.1|	0	zinc finger and BTB domain-containing protein 44 isoform a [Mus musculus]
NM_001033443.4	novel_mir4211,mmu-miR-874-3p,novel_mir772,novel_mir2132,novel_mir4614,novel_mir989,novel_mir2582,novel_mir2527,novel_mir369,novel_mir1077,novel_mir2541,novel_mir347,novel_mir1466,novel_mir636,novel_mir491,novel_mir2922,novel_mir1681,novel_mir1752,novel_mir628,novel_mir271,novel_mir2892,novel_mir495,novel_mir4068,novel_mir501,novel_mir4546,novel_mir647,novel_mir920,novel_mir2562,novel_mir5504,nove…	6mer	NA	-20.62	151	Cdkl4	GO:0005737,GO:0004693,GO:0005524,GO:0006468,	K08824|1|2.2e-198|696.8|mmu:381113|cyclin-dependent kinase-like [EC:2.7.11.22]	gi|84370314|ref|NP_001028615.1|	0	cyclin-dependent kinase-like 4 [Mus musculus]
NM_134126.3	novel_mir3269,novel_mir354,novel_mir3585,novel_mir3667,novel_mir1053,novel_mir3172,novel_mir686,novel_mir4831,novel_mir4525,novel_mir459,novel_mir5970,novel_mir2929,novel_mir3245,novel_mir696,novel_mir213,novel_mir2476,novel_mir4295,novel_mir1626,novel_mir3205,novel_mir4246,novel_mir5459,novel_mir3664,novel_mir773,novel_mir1094,novel_mir5076,novel_mir1641,novel_mir5003,novel_mir1588,novel_mir275,…	6mer	NA	-26.19	168	Ift140	-	K19672|1|0.0e+00|2559.3|eai:106836206|intraflagellar transport protein 140	gi|184186088|ref|NP_598887.3|	0	intraflagellar transport protein 140 homolog [Mus musculus]
NM_009505.4	novel_mir3740,novel_mir124,novel_mir423,novel_mir3483,novel_mir879,novel_mir88,novel_mir197,novel_mir6141,novel_mir1943,novel_mir2759,novel_mir693,novel_mir2361,novel_mir3605,novel_mir4564,novel_mir2599,novel_mir4247,novel_mir1075,novel_mir5609,novel_mir5761,novel_mir4735,novel_mir4013,novel_mir3785,novel_mir217,novel_mir2773,novel_mir494,novel_mir6118,novel_mir45,novel_mir3263,novel_mir2598,nove…	8mer-1a	NA	-20.72	149	Vegfa	GO:0005604,GO:0016020,GO:0009986,GO:0005634,GO:0005615,GO:0030141,GO:0008083,GO:0042056,GO:0001968,GO:0046982,GO:0042803,GO:0005161,GO:0050840,GO:0019838,GO:0048018,GO:0043184,GO:0008201,GO:0038191,GO:0043183,GO:0005125,GO:0002043,GO:0007498,GO:0038091,GO:0061419,GO:1901215,GO:1903572,GO:0045599,GO:1901727,GO:0001541,GO:1901492,GO:0060978,GO:0035148,GO:0042088,GO:0002575,GO:0032570,GO:0048255,GO:…	K05448|1|2.4e-199|700.3|oro:101363442|vascular endothelial growth factor A	gi|160358803|ref|NP_033531.3|	0	vascular endothelial growth factor A isoform 2 [Mus musculus]
XM_006497984.3	novel_mir946,novel_mir5916,novel_mir3692,novel_mir658,novel_mir348,novel_mir1018,novel_mir3650,novel_mir3234,novel_mir2627,novel_mir303,novel_mir369,novel_mir5982,novel_mir1301,novel_mir5850,mmu-miR-34a-5p,novel_mir2615,novel_mir3384,novel_mir3070,novel_mir551,mmu-miR-34c-5p,novel_mir6150,novel_mir1292,novel_mir2550,novel_mir146,novel_mir1702,novel_mir483,novel_mir1286,novel_mir3533,novel_mir1005…	6mer	NA	-24.1	159	Rabepk	GO:0005768,GO:0005886,	K20285|1|1.7e-230|803.5|mmu:227746|Rab9 effector protein with kelch motifs	gi|568913573|ref|XP_006498047.1|	0	PREDICTED: rab9 effector protein with kelch motifs isoform X1 [Mus musculus]
NM_011200.2	novel_mir1866,novel_mir59,novel_mir3606,novel_mir90,novel_mir4140,novel_mir1297,novel_mir68,novel_mir5771,novel_mir1291,novel_mir1195,novel_mir3581,novel_mir1345,novel_mir2272,novel_mir173,novel_mir254,novel_mir1701,novel_mir2582,novel_mir2043,novel_mir2783,novel_mir2775,novel_mir5730,novel_mir1690,novel_mir5869,novel_mir4551,novel_mir343,novel_mir5579,novel_mir4597,novel_mir2909,novel_mir3610,no…	7mer-m8	NA	-21.33	154	Ptp4a1	GO:0070062,GO:0005769,GO:0005819,GO:0005783,GO:0005634,GO:0009898,GO:0004727,GO:0008138,GO:0035335,GO:0007049,GO:0007275,GO:0030335,	K18041|1|7.0e-97|360.1|oro:101365288|protein tyrosine phosphatase type IVA [EC:3.1.3.48]	gi|148682476|gb|EDL14423.1|	1.16809e-128	protein tyrosine phosphatase 4a1, isoform CRA_b, partial [Mus musculus]
NM_023331.2	novel_mir650,novel_mir2247,novel_mir2296,novel_mir569,novel_mir3757,novel_mir3039,novel_mir245,novel_mir997,novel_mir280,novel_mir2720,novel_mir5671,novel_mir347,novel_mir182,novel_mir2280,novel_mir1431,novel_mir4767,novel_mir2348,novel_mir192,novel_mir5313,novel_mir4565,novel_mir5333,mmu-miR-103-3p,novel_mir5698,novel_mir2137,novel_mir446,novel_mir322,novel_mir3005,novel_mir486,novel_mir5876,nov…	8mer-1a	NA	-47.25	297	Mrpl46	GO:0005762,GO:0005654,GO:0030054,GO:0003735,GO:0016787,	K17427|1|8.1e-160|567.4|mmu:67308|large subunit ribosomal protein L46	gi|12963643|ref|NP_075820.1|	0	39S ribosomal protein L46, mitochondrial [Mus musculus]
NM_026434.4	novel_mir1588,novel_mir4695,novel_mir4288,novel_mir782,novel_mir3352,novel_mir5531,novel_mir1567,novel_mir3902,novel_mir857,novel_mir5352,novel_mir11,novel_mir643,novel_mir773,novel_mir5116,novel_mir5180,novel_mir1063,novel_mir4101,novel_mir416,novel_mir1049,novel_mir4785,novel_mir4533,novel_mir353,novel_mir3925,novel_mir1044,novel_mir2358,novel_mir5299,novel_mir259,novel_mir5519,novel_mir4473,no…	7mer-1a	NA	-24.24	152	Rbm18	GO:0003723,GO:0000166,GO:0002230,GO:0098792,	K12842|1|9.2e-07|60.1|haw:110372924|U2-associated protein SR140	gi|13385930|ref|NP_080710.1|	1.62075e-140	probable RNA-binding protein 18 isoform 1 [Mus musculus]
NM_009049.1	novel_mir227,novel_mir3400,novel_mir5398,novel_mir269,novel_mir3726,novel_mir680,novel_mir4318,novel_mir691,novel_mir435,novel_mir2279,novel_mir3911,novel_mir4638,novel_mir1403,novel_mir115,novel_mir2639,novel_mir4791,novel_mir6118,novel_mir3950	8mer-1a	NA	-24.76	144	Resp18	GO:0005794,GO:0043204,GO:0030141,GO:0005576,GO:0048237,GO:0001701,	K07817|1|6.9e-13|78.6|oro:101380601|receptor-type tyrosine-protein phosphatase N [EC:3.1.3.48]	gi|6677717|ref|NP_033075.1|	2.41788e-129	regulated endocrine-specific protein 18 precursor [Mus musculus]
NM_025655.2	novel_mir4515,novel_mir5376,novel_mir4568,novel_mir5819,novel_mir3642,mmu-miR-8091,novel_mir76,novel_mir619,novel_mir5301,novel_mir1119,novel_mir428,novel_mir2038,novel_mir5115	7mer-m8	NA	-20.31	159	Tmigd1	GO:0016021,	K06491|1|2.4e-09|67.8|sko:102808115|neural cell adhesion molecule!K17341|2|4.4e-08|63.5|spu:574679|hemicentin	gi|568975263|ref|XP_006534011.1|	0	PREDICTED: transmembrane and immunoglobulin domain-containing protein 1 isoform X3 [Mus musculus]
NM_007825.4	novel_mir185,novel_mir580,novel_mir997,novel_mir1154,novel_mir667,novel_mir2729,novel_mir3970,novel_mir4479,novel_mir710,novel_mir2156,novel_mir4363,novel_mir2043,novel_mir2180,novel_mir781,novel_mir2378,novel_mir5099,novel_mir258,novel_mir3225,novel_mir3858,novel_mir4069,novel_mir2312,novel_mir5573,novel_mir484,novel_mir241,novel_mir2561,novel_mir6148,novel_mir6011,novel_mir2174,novel_mir5105,no…	6mer	NA	-20.4	156	Cyp7b1	GO:0016020,GO:0005783,GO:0033783,GO:0020037,GO:0008396,GO:0005506,GO:0007613,GO:0008203,GO:0060740,GO:0033147,GO:0035754,GO:0006699,GO:0050679,GO:0055114,GO:0007586,GO:0007623,	K07430|1|3.3e-255|885.2|rno:25429|25/26-hydroxycholesterol 7alpha-hydroxylase [EC:1.14.14.29]	gi|568920744|ref|XP_006535447.1|	0	PREDICTED: 25-hydroxycholesterol 7-alpha-hydroxylase isoform X2 [Mus musculus]
NM_175032.3	novel_mir6099,novel_mir1343,novel_mir4147,novel_mir3172,novel_mir6020,novel_mir5183,novel_mir597,novel_mir4529,novel_mir1449,novel_mir4249,novel_mir999,novel_mir893,novel_mir594,novel_mir742,novel_mir696,novel_mir4246,novel_mir573,novel_mir371,novel_mir11,novel_mir4203,novel_mir4800,mmu-miR-8116,novel_mir117,mmu-miR-880-3p,novel_mir2179,novel_mir2164,mmu-miR-871-3p,novel_mir275,mmu-miR-344-3p,nov…	8mer-1a	NA	-22.22	155	Galntl6	GO:0003980,GO:0052638,GO:0046921,GO:0052757,GO:0080062,GO:0052641,GO:0000033,GO:0052824,GO:0018717,GO:0008921,GO:0042281,GO:0016759,GO:0000026,GO:0019187,GO:0035496,GO:0033556,GO:0046920,GO:0052640,GO:0018716,GO:0008755,GO:0008376,GO:0018718,GO:0001962,GO:0004576,GO:0004583,GO:0008375,GO:0031278,GO:0018715,GO:0042283,GO:0004376,GO:0052639,GO:0045140,	K00710|1|0.0e+00|1293.1|cfa:486063|polypeptide N-acetylgalactosaminyltransferase [EC:2.4.1.41]	gi|261244898|ref|NP_778197.2|	0	polypeptide N-acetylgalactosaminyltransferase-like 6 [Mus musculus]
NM_009867.3	novel_mir3766,novel_mir3752,novel_mir2805,novel_mir4287,novel_mir5819,novel_mir4095,novel_mir964,novel_mir2444,novel_mir1425,novel_mir1230,novel_mir5948,novel_mir1229,novel_mir3797,novel_mir2273,novel_mir798,novel_mir4091,novel_mir426,novel_mir144,novel_mir5428,mmu-miR-7051-5p,novel_mir4894,novel_mir1426,novel_mir5128,novel_mir1972,novel_mir5234,novel_mir1312,novel_mir1834,novel_mir490,novel_mir2…	7mer-1a	NA	-23.78	156	Cdh4	GO:0005887,GO:0005509,GO:0007411,GO:0007156,GO:0007157,GO:0045773,	K06797|1|0.0e+00|1711.4|hgl:101726465|cadherin 4, type 1, R-cadherin	gi|6753376|ref|NP_033997.1|	0	cadherin-4 isoform 1 preproprotein [Mus musculus]
NM_016915.4	novel_mir5337,mmu-miR-16-5p,novel_mir1932,novel_mir2673,novel_mir1432,novel_mir1322,novel_mir282,novel_mir1876,novel_mir1038,novel_mir1122,novel_mir832,novel_mir1813,novel_mir4488,novel_mir673,novel_mir3521,novel_mir1204,novel_mir3739,mmu-miR-29a-3p,novel_mir2090,novel_mir1589,novel_mir729,novel_mir4990,novel_mir1164,novel_mir4743,novel_mir2287,novel_mir368,novel_mir801,novel_mir180,novel_mir554,…	6mer	NA	-21.34	152	Pla2g6	GO:0005829,GO:0005615,GO:0005739,GO:0005815,GO:0016020,GO:0019901,GO:0005516,GO:0043008,GO:0047499,GO:2000304,GO:0019731,GO:0035774,GO:1901339,GO:0090238,GO:0016042,GO:0007204,GO:0034976,GO:0045921,GO:0007613,GO:0090200,GO:0090037,GO:0032049,GO:0001934,GO:0006935,GO:0051967,GO:0014832,	K16343|1|0.0e+00|1502.6|rno:360426|calcium-independent phospholipase A2 [EC:3.1.1.4]	gi|8393978|ref|NP_058611.1|	0	85/88 kDa calcium-independent phospholipase A2 isoform 1 [Mus musculus]
NM_023595.6	novel_mir569,novel_mir4566,novel_mir1188,novel_mir5326,novel_mir259,novel_mir1729,novel_mir69,novel_mir1910,mmu-miR-199b-5p,novel_mir4077,novel_mir2332,novel_mir4549,mmu-miR-152-3p,novel_mir1374,novel_mir140,novel_mir3667,novel_mir153,novel_mir597,novel_mir3591,novel_mir4369,novel_mir1245,novel_mir383,novel_mir400,novel_mir1239,mmu-miR-6971-3p,novel_mir2033,novel_mir3696,novel_mir795,novel_mir502…	8mer-1a	NA	-45.77	302	Dut	GO:0005654,GO:0005829,GO:0070062,GO:0005739,GO:0032556,GO:0042975,GO:0004170,GO:0030547,GO:0000287,GO:0046081,GO:0043497,GO:0006226,GO:0070207,	K01520|1|2.5e-83|314.3|mmu:110074|dUTP pyrophosphatase [EC:3.6.1.23]	gi|21281687|ref|NP_076084.2|	1.75003e-115	deoxyuridine 5'-triphosphate nucleotidohydrolase, mitochondrial isoform 2 [Mus musculus]
NM_011532.2	mmu-miR-744-5p,novel_mir3726,novel_mir5398,novel_mir3584,novel_mir4300,novel_mir368,novel_mir2287,novel_mir2946,novel_mir5878,mmu-miR-6959-5p,novel_mir4149,novel_mir4771,novel_mir174,novel_mir2032,mmu-miR-139-5p,novel_mir3950,novel_mir56,novel_mir3498,novel_mir3706,novel_mir5762,novel_mir282,novel_mir3463,novel_mir4340,novel_mir1446,novel_mir906,novel_mir1468,novel_mir43,novel_mir1632,novel_mir36…	6mer	NA	-32.94	147	Tbx1	GO:0005634,GO:0005634,GO:0042803,GO:0001162,GO:0001228,GO:0042803,GO:0001162,GO:0001228,GO:0030878,GO:2001054,GO:0002053,GO:2001037,GO:0060415,GO:0007498,GO:0042693,GO:0009952,GO:0044344,GO:0060982,GO:0035909,GO:0001945,GO:0003148,GO:0001708,GO:0072513,GO:0007605,GO:0060037,GO:0042474,GO:0043410,GO:0050679,GO:0070166,GO:0090103,GO:0045596,GO:0071600,GO:0045944,GO:0001974,GO:0035176,GO:0071300,GO:…	K10175|1|2.0e-298|1028.5|mmu:21380|T-box protein 1	gi|550822068|ref|NP_001272401.1|	0	T-box transcription factor TBX1 isoform 2 [Mus musculus]
NM_009358.3	novel_mir1670,novel_mir2887,novel_mir144,novel_mir4049,novel_mir2440,mmu-miR-3084-3p,novel_mir716,novel_mir971,novel_mir4287,novel_mir929,novel_mir2444,novel_mir1911,novel_mir1230,novel_mir1425,novel_mir211,novel_mir244,novel_mir5822,novel_mir4386,novel_mir4512,novel_mir2781,novel_mir1312,mmu-miR-6991-3p,novel_mir2181,novel_mir987,mmu-miR-181d-3p,novel_mir4718,novel_mir2575,novel_mir3434,mmu-miR-…	7mer-1a	NA	-20.28	149	Ppp2r5d	GO:0005515,GO:0031952,GO:0010976,GO:0045944,GO:0051388,	K11584|1|0.0e+00|1256.5|rno:363193|serine/threonine-protein phosphatase 2A regulatory subunit B'	gi|33285883|gb|AAQ01559.1|	0	protein phosphatase 2A B56 delta subunit [Mus musculus]
XM_006518658.3	novel_mir764,novel_mir30,novel_mir5084,novel_mir2200,novel_mir3642,novel_mir5326,novel_mir3622,novel_mir2641,novel_mir1488,novel_mir2779,novel_mir4228,novel_mir633,novel_mir3869,novel_mir2091,novel_mir3147,novel_mir2382,novel_mir2828,novel_mir1273,mmu-miR-206-3p,novel_mir1964,novel_mir4686,novel_mir6106,novel_mir4783,novel_mir5399,novel_mir3107,novel_mir4006,novel_mir4320,novel_mir1434,mmu-miR-10…	8mer-1a	NA	-23.98	153	Ktn1	GO:0016021,GO:0005783,GO:0019894,GO:0007018,	K17975|1|0.0e+00|2208.3|mmu:16709|kinectin	gi|568986908|ref|XP_006518710.1|	0	PREDICTED: kinectin isoform X17 [Mus musculus]
XM_011242218.2	novel_mir313,novel_mir1502,novel_mir65,novel_mir416,novel_mir5182,novel_mir4018,novel_mir4203,mmu-miR-136-5p,novel_mir6045,novel_mir3848,novel_mir3695,novel_mir2758,mmu-miR-1947-5p,novel_mir4179,novel_mir2547,novel_mir838,novel_mir5936,novel_mir1531,novel_mir1127,novel_mir4361,mmu-miR-7667-5p,novel_mir2533,novel_mir4392,novel_mir4619,novel_mir4369,novel_mir469,novel_mir855,novel_mir4844,novel_mir…	6mer	NA	-29.23	149	Tenm3	-	K06252|1|1.5e-64|254.2|phyp:113524928|tenascin	gi|568954807|ref|XP_006509475.1|	0	PREDICTED: teneurin-3 isoform X13 [Mus musculus]
NM_029197.1	novel_mir1632,novel_mir1672,novel_mir4757,novel_mir1922,novel_mir5522,novel_mir4767,novel_mir4225,novel_mir307,novel_mir2297,novel_mir282,novel_mir3618,novel_mir2079,novel_mir3686,novel_mir5678,novel_mir1659,novel_mir4103,novel_mir3628	7mer-m8	NA	-20.14	153	Meiob	GO:0005694,GO:0005737,GO:0005634,GO:0008310,GO:0003697,GO:0003682,GO:0090305,GO:0007141,GO:0000712,GO:0000724,GO:0009566,GO:0007129,GO:0007144,	K22420|1|7.4e-271|936.8|mmu:75178|meiosis-specific with OB domain-containing protein [EC:3.1.-.-]	gi|254675140|ref|NP_083473.1|	0	meiosis-specific with OB domain-containing protein [Mus musculus]
XM_006535553.3	novel_mir5213,novel_mir3774,novel_mir2826,novel_mir1094,novel_mir1377,novel_mir457,novel_mir1575,novel_mir5689,novel_mir1565,novel_mir103,novel_mir973,novel_mir3375,novel_mir381,novel_mir319,novel_mir1852,mmu-miR-370-5p,novel_mir1203,novel_mir221,novel_mir1696,mmu-miR-324-3p,novel_mir841,novel_mir857,novel_mir5021,novel_mir5352,novel_mir1615,novel_mir1733,novel_mir5888,novel_mir5650,novel_mir5319…	8mer-1a	NA	-20.84	149	Usp13	GO:0008270,GO:1904288,GO:0051087,GO:0031625,GO:0043130,GO:0004197,GO:0004843,GO:0070628,GO:1904454,GO:0010506,GO:0006511,GO:1904294,GO:0006355,GO:0050821,GO:0070536,GO:1904378,GO:0008283,	K11836|1|0.0e+00|1228.8|gja:107120613|ubiquitin carboxyl-terminal hydrolase 5/13 [EC:3.4.19.12]	gi|568921087|ref|XP_006535616.1|	0	PREDICTED: ubiquitin carboxyl-terminal hydrolase 13 isoform X1 [Mus musculus]
NM_027790.2	novel_mir4769,novel_mir4807,novel_mir3262,novel_mir1285,novel_mir6089,novel_mir2137,novel_mir5319,novel_mir4037,novel_mir4866,novel_mir4227,novel_mir3233	6mer	NA	-25.6	153	Dhrs2	-	K11164|1|1.0e-155|553.9|mmu:71412|dehydrogenase/reductase SDR family member 2 [EC:1.1.-.-]	gi|160333490|ref|NP_082066.2|	0	dehydrogenase/reductase SDR family member 2, mitochondrial [Mus musculus]
NM_177086.4	novel_mir5549,novel_mir824,novel_mir1972,novel_mir4909,novel_mir823,novel_mir2519,novel_mir2386,novel_mir2781,novel_mir5654,novel_mir5234,novel_mir2762,novel_mir2199,novel_mir130,novel_mir397,novel_mir3196,novel_mir2805,novel_mir971,novel_mir4205,novel_mir2021,novel_mir1911,novel_mir283,novel_mir5401,novel_mir4304,novel_mir1361,novel_mir426,novel_mir4049,novel_mir1506,novel_mir2808,novel_mir4856,…	7mer-m8	NA	-24.04	151	Zmat4	GO:0005634,GO:0003677,GO:0002039,GO:0003723,GO:0008270,GO:0072332,	K10137|1|1.4e-12|80.1|ipu:108271156|zinc finger, matrin type 3	gi|568954134|ref|XP_006509202.1|	1.58719e-171	PREDICTED: zinc finger matrin-type protein 4 isoform X2 [Mus musculus]
NM_153104.3	novel_mir2431,novel_mir6054,novel_mir3566,novel_mir293,novel_mir1094,novel_mir973,novel_mir6027,novel_mir1861,mmu-miR-324-3p,novel_mir1203,novel_mir841,mmu-miR-150-5p,novel_mir531,novel_mir5021,novel_mir1021,novel_mir5784,novel_mir164,novel_mir4995,novel_mir4282,novel_mir184,mmu-miR-342-5p,novel_mir4948,novel_mir686,novel_mir3139,novel_mir607,mmu-miR-6961-5p,novel_mir1689,novel_mir2112,novel_mir3…	7mer-1a	NA	-36.43	167	Phospho1	GO:0065010,GO:0005578,GO:0046872,GO:0016462,GO:0052731,GO:0052732,GO:0001958,GO:0035630,GO:0030500,GO:0016311,	K06124|1|9.8e-155|551.2|mmu:237928|phosphoethanolamine/phosphocholine phosphatase [EC:3.1.3.75]	gi|148684046|gb|EDL15993.1|	0	phosphatase, orphan 1, isoform CRA_a, partial [Mus musculus]
XM_011238687.2	novel_mir3180,novel_mir4749,novel_mir4223,novel_mir2737,novel_mir1295,novel_mir260,novel_mir514,novel_mir1746,novel_mir360,novel_mir3804,novel_mir3101,novel_mir672,novel_mir121,novel_mir858,novel_mir548,novel_mir409,novel_mir1359,novel_mir3263,novel_mir1439,novel_mir6046,novel_mir1317,novel_mir4012,novel_mir1943,novel_mir569,novel_mir3338,novel_mir5326,novel_mir4262,novel_mir3025,novel_mir3243,no…	6mer	NA	-22.42	144	Atg9a	GO:0016021,GO:0000407,GO:0031902,GO:0031410,GO:0055037,GO:0005802,GO:0000421,GO:0044805,GO:0032688,GO:0034727,GO:0045087,GO:0034067,GO:0034497,GO:0015031,GO:0000422,	K17907|1|0.0e+00|1714.9|mmu:245860|autophagy-related protein 9	gi|86990446|ref|NP_001003917.2|	0	autophagy-related protein 9A isoform a [Mus musculus]
NM_001134461.1	novel_mir2564,novel_mir4500,novel_mir5111,novel_mir1338,novel_mir6142,novel_mir66,novel_mir3007,novel_mir2573,novel_mir387,novel_mir1701,novel_mir6162,novel_mir1403,novel_mir3475,novel_mir4380,novel_mir5776,novel_mir3490,mmu-miR-18a-5p,novel_mir1175,novel_mir2379,mmu-miR-148b-3p,novel_mir588,novel_mir5456,novel_mir1495,novel_mir4005,novel_mir1292,novel_mir1466,novel_mir5869,mmu-miR-322-3p,novel_m…	8mer-1a	NA	-45.19	302	Prickle2	GO:0005737,GO:0016328,GO:0016327,GO:0005634,GO:0005515,GO:0008270,GO:0045197,GO:0031175,GO:0030010,GO:0001830,	K04511|1|0.0e+00|1758.0|mmu:243548|prickle	gi|197333830|ref|NP_001127931.1|	0	prickle-like protein 2 isoform b [Mus musculus]
NM_028887.3	novel_mir2586,novel_mir3599,novel_mir457,novel_mir1575,novel_mir5945,novel_mir973,novel_mir559,novel_mir4246,novel_mir3790,novel_mir1886,novel_mir4203,novel_mir2131,novel_mir1920,novel_mir572,novel_mir4259,novel_mir1615,novel_mir2530,novel_mir812,novel_mir1556,novel_mir1477,novel_mir1436,novel_mir3123,novel_mir5062,novel_mir4280,novel_mir3179,novel_mir3269,novel_mir2276,novel_mir354,novel_mir2157…	8mer-1a	NA	-28.31	170	Smchd1	-	K23113|1|0.0e+00|3867.0|rno:316732|structural maintenance of chromosomes flexible hinge domain-containing protein 1	gi|148839318|ref|NP_083163.3|	0	structural maintenance of chromosomes flexible hinge domain-containing protein 1 [Mus musculus]
NM_026234.4	novel_mir5807,novel_mir3077,novel_mir4784,novel_mir3233,novel_mir5541,mmu-miR-3473b,novel_mir3908,novel_mir2306,novel_mir5105,novel_mir4181,novel_mir3222,novel_mir4754,novel_mir2079,novel_mir5751,novel_mir3372,novel_mir6160,novel_mir59,novel_mir1574,novel_mir1451,novel_mir89,novel_mir1489,novel_mir461,novel_mir5579,novel_mir764,novel_mir887,mmu-miR-214-5p,novel_mir1891,novel_mir2587,novel_mir2816…	6mer	NA	-43.52	313	Pigm	GO:0016021,GO:0005789,GO:0019187,GO:0004583,GO:0042283,GO:0000033,GO:0018717,GO:0004576,GO:0018718,GO:0016759,GO:0003980,GO:0052757,GO:0018715,GO:0008755,GO:0018716,GO:0045140,GO:0008376,GO:0052639,GO:0052638,GO:0052640,GO:0052641,GO:0052824,GO:0080062,GO:0033556,GO:0046921,GO:0004376,GO:0008921,GO:0035496,GO:0000026,GO:0046920,GO:0001962,GO:0031278,GO:0008375,GO:0042281,GO:0006506,GO:0097502,	K05284|1|1.6e-232|811.6|ngi:103740234|phosphatidylinositol glycan, class M [EC:2.4.1.-]	gi|19920329|ref|NP_080510.1|	0	GPI mannosyltransferase 1 [Mus musculus]
NM_029100.2	novel_mir4502,novel_mir4018,novel_mir1766,novel_mir530,mmu-miR-1964-5p,novel_mir4800,novel_mir5182,novel_mir1492,novel_mir705,mmu-miR-5129-3p,mmu-miR-871-3p,novel_mir4361,novel_mir18,mmu-miR-6971-3p,novel_mir404,novel_mir513,novel_mir316,novel_mir4550,novel_mir2001,novel_mir4179,novel_mir853,novel_mir4697,novel_mir2307,novel_mir252,novel_mir4236,novel_mir6059,novel_mir1107,novel_mir4844,novel_mir…	6mer	NA	-27.42	149	Sepn1	-	K19874|1|0.0e+00|1125.5|mmu:74777|selenoprotein N	gi|111118964|ref|NP_083376.2|	0	selenoprotein N [Mus musculus]
NM_029884.1	mmu-miR-341-5p,novel_mir1428,novel_mir5645,novel_mir1649,novel_mir3311,novel_mir1769,novel_mir1609,novel_mir656,novel_mir1877,novel_mir577,novel_mir3745,novel_mir5503,novel_mir1800,novel_mir2394,novel_mir3607,novel_mir698,novel_mir2757,novel_mir1894,novel_mir2767,novel_mir625,novel_mir2355,novel_mir3212,novel_mir2639,novel_mir4242,novel_mir3926,novel_mir455,novel_mir4501,novel_mir2648,mmu-miR-337…	6mer	NA	-57.52	305	Hgsnat	GO:0005765,GO:0016021,GO:0015019,GO:0007041,GO:0051259,	K10532|1|0.0e+00|1328.5|mmu:52120|heparan-alpha-glucosaminide N-acetyltransferase [EC:2.3.1.78]	gi|115292433|ref|NP_084160.1|	0	heparan-alpha-glucosaminide N-acetyltransferase [Mus musculus]
NM_172609.3	mmu-miR-6971-3p,novel_mir782,novel_mir2129,novel_mir1588,novel_mir2164,novel_mir626,novel_mir2443,novel_mir1733,novel_mir5088,novel_mir1959,novel_mir476,novel_mir2439,novel_mir830,novel_mir210,novel_mir2734,mmu-miR-7052-3p,novel_mir4834,novel_mir3119,novel_mir257,novel_mir4538,novel_mir423,novel_mir5263,novel_mir1346,novel_mir913,novel_mir4387,novel_mir2280,novel_mir2563,novel_mir2450,novel_mir40…	7mer-m8	NA	-28.39	149	Tomm22	GO:0005743,GO:0005742,GO:0031307,GO:0015266,GO:0005515,GO:0030150,GO:0045040,	K17769|1|2.3e-73|280.0|mmu:223696|mitochondrial import receptor subunit TOM22	gi|31982091|ref|NP_766197.2|	2.35689e-96	mitochondrial import receptor subunit TOM22 homolog [Mus musculus]
NM_030238.2	novel_mir3516,novel_mir2155,novel_mir4348,novel_mir520,novel_mir653,novel_mir4656,novel_mir5499,novel_mir3376,mmu-miR-532-3p,novel_mir3640,novel_mir3413,novel_mir4665,novel_mir5442,novel_mir4611,novel_mir1641,novel_mir4244,novel_mir2560,novel_mir1065,novel_mir4242,novel_mir3765,novel_mir1749,novel_mir1681,novel_mir6026,novel_mir4744,mmu-miR-340-3p,novel_mir1230,novel_mir4320,novel_mir5952,novel_m…	7mer-m8	NA	-46.19	303	Dync1h1	GO:0030175,GO:0005874,GO:0070062,GO:0005813,GO:0005868,GO:0005737,GO:0016020,GO:0003777,GO:0005524,GO:0016887,GO:0051959,GO:0006810,GO:0051293,GO:0033962,GO:0007018,GO:0034063,	K10413|1|0.0e+00|9216.3|mmu:13424|dynein heavy chain 1, cytosolic	gi|134288917|ref|NP_084514.2|	0	cytoplasmic dynein 1 heavy chain 1 [Mus musculus]
NM_026644.2	novel_mir2897,novel_mir1304,novel_mir1367,novel_mir1958,novel_mir126,novel_mir892,novel_mir2156,novel_mir3113,novel_mir4398,novel_mir25,novel_mir1669,novel_mir894,mmu-miR-5114,novel_mir4485,novel_mir743,novel_mir5823,novel_mir997,novel_mir3400,novel_mir227,novel_mir347,novel_mir953,novel_mir3159,novel_mir3589,novel_mir700,novel_mir3323,novel_mir5149,novel_mir5251,novel_mir4242,novel_mir2767,mmu-m…	7mer-1a	NA	-30.57	167	Agpat4	GO:0016021,GO:0003841,GO:0016024,	K13523|1|9.7e-211|737.3|hgl:101701125|lysophosphatidic acid acyltransferase / lysophosphatidylinositol acyltransferase [EC:2.3.1.51 2.3.1.-]	gi|568998286|ref|XP_006523410.1|	0	PREDICTED: 1-acyl-sn-glycerol-3-phosphate acyltransferase delta isoform X2 [Mus musculus]
NM_175503.3	mmu-miR-339-3p,novel_mir1004,novel_mir2425,novel_mir5595,novel_mir406,novel_mir4525,novel_mir607,novel_mir1188,novel_mir4566,novel_mir4249,novel_mir384,mmu-miR-6961-5p,novel_mir3259,novel_mir4322,novel_mir2094,novel_mir407,novel_mir1622,novel_mir2912,novel_mir2516,novel_mir5237,novel_mir3068,novel_mir826,novel_mir3667,novel_mir1053,novel_mir1646,novel_mir4376,novel_mir4004,novel_mir880,novel_mir4…	8mer-1a	NA	-53.33	300	Aard	GO:0030324,	K05747|1|2.4e-06|57.8|bta:107131173|Wiskott-Aldrich syndrome protein	gi|118150648|ref|NP_780712.2|	7.13368e-118	alanine and arginine-rich domain-containing protein [Mus musculus]
NM_001081408.1	novel_mir1402,novel_mir4961,novel_mir280,novel_mir390,novel_mir1198,novel_mir1690,novel_mir1488,novel_mir1495,novel_mir2845,novel_mir2495,novel_mir2729,novel_mir2200,novel_mir1287,novel_mir166,novel_mir3153,novel_mir278,novel_mir2194,novel_mir3277,novel_mir2277,novel_mir199,novel_mir1856,mmu-miR-540-3p,novel_mir2583,novel_mir5825,novel_mir5615,novel_mir3438,novel_mir3652,novel_mir241,novel_mir131…	6mer	NA	-42.42	286	Agmat	GO:0070062,GO:0005739,GO:0008783,GO:0046872,GO:0033388,GO:0008295,	K01480|1|1.4e-206|723.0|mmu:75986|agmatinase [EC:3.5.3.11]	gi|568932038|ref|XP_006539309.1|	0	PREDICTED: agmatinase, mitochondrial isoform X1 [Mus musculus]
NM_016769.4	novel_mir5503,novel_mir1632,novel_mir900,novel_mir3344,novel_mir1259,novel_mir5277,novel_mir5375,novel_mir159,novel_mir149,mmu-miR-145a-5p,novel_mir4290,novel_mir898,novel_mir3323,mmu-miR-2137,novel_mir5943,novel_mir1694,novel_mir5149,novel_mir2767,novel_mir4996,novel_mir4463,novel_mir1042,novel_mir1681,novel_mir327,novel_mir4008,novel_mir1154,novel_mir1235,novel_mir3878,novel_mir2402,novel_mir33…	8mer-1a	NA	-78.16	478	Smad3	-	K04500|1|3.0e-259|899.8|tmu:101344857|mothers against decapentaplegic homolog 2/3	gi|223029444|ref|NP_001138576.1|	4.49974e-174	mothers against decapentaplegic homolog 3 isoform 4 [Homo sapiens]
NM_027491.2	novel_mir2537,novel_mir764,novel_mir1002,mmu-miR-326-3p,novel_mir482,novel_mir3409,novel_mir461,novel_mir4328,novel_mir6150,novel_mir1216,novel_mir1568,mmu-miR-346-5p,novel_mir2587,novel_mir1640,novel_mir2311,novel_mir1119,novel_mir1402,novel_mir4596,novel_mir1891,novel_mir2475,novel_mir5723,novel_mir1464,novel_mir4196,novel_mir1863,novel_mir3310,mmu-miR-1970,novel_mir2634,novel_mir1662,novel_mir…	7mer-m8	NA	-25.44	152	Rragd	GO:1990131,GO:0005764,GO:0034448,GO:0005634,GO:0003924,GO:0046982,GO:0005525,GO:0010506,GO:0009267,GO:0032008,GO:0071230,	K16186|1|5.5e-229|799.3|mmu:52187|Ras-related GTP-binding protein C/D	gi|120444910|ref|NP_081767.2|	0	ras-related GTP-binding protein D [Mus musculus]
XR_384545.3	novel_mir3141,novel_mir324,novel_mir1975,novel_mir4900,novel_mir3210,novel_mir4322,novel_mir2929,novel_mir5970,novel_mir1519,novel_mir1689,novel_mir524,novel_mir5595,novel_mir4831,novel_mir794,novel_mir3139,novel_mir4249,novel_mir295,novel_mir3282,novel_mir4844,novel_mir4489,novel_mir1030,novel_mir300,novel_mir4289,novel_mir164,novel_mir572,novel_mir2530,novel_mir1733,novel_mir316,novel_mir5780,n…	7mer-m8	NA	-22.12	145	Top3b	-	-	-	-	-
NM_177722.3	novel_mir3972,novel_mir2946,novel_mir86,novel_mir497,novel_mir4862,novel_mir1093,novel_mir5730,novel_mir1878,novel_mir2273,novel_mir4163,novel_mir2789,novel_mir2145,novel_mir5065,novel_mir3399,novel_mir728,novel_mir1077,novel_mir5979,novel_mir5173,novel_mir1728,novel_mir4398,novel_mir5681,novel_mir5082,novel_mir4893	6mer	NA	-21.45	153	Mcmdc2	GO:0003677,GO:0005524,GO:0006260,	K10738|1|2.0e-14|85.5|clec:106672636|DNA helicase MCM9 [EC:3.6.4.12]	gi|183227685|ref|NP_808390.2|	0	MCM domain-containing protein 2 [Mus musculus]
NM_133982.1	novel_mir5634,novel_mir491,novel_mir482,novel_mir4956,novel_mir4380,novel_mir1591,novel_mir5666,novel_mir1119,novel_mir4134,novel_mir1212,novel_mir931,novel_mir2366,novel_mir2360,novel_mir3650,novel_mir3922,novel_mir2918,novel_mir1863,novel_mir3480,novel_mir4500,novel_mir2465,novel_mir2475,novel_mir5723,novel_mir3507,novel_mir983,novel_mir5839,novel_mir2106,novel_mir1662,novel_mir3010,novel_mir34…	8mer-1a	NA	-20.9	154	Rpp25	GO:0005815,GO:0005654,GO:0004526,GO:0090502,GO:0008033,	K14525|1|2.2e-108|396.7|mmu:102614|ribonucleases P/MRP protein subunit RPP25 [EC:3.1.26.5]	gi|19527204|ref|NP_598743.1|	3.29196e-142	ribonuclease P protein subunit p25 [Mus musculus]
NM_175407.3	novel_mir3898,novel_mir4008,novel_mir190,novel_mir4692,novel_mir25,novel_mir5914,novel_mir2865,novel_mir4485,mmu-miR-744-5p,novel_mir1258,novel_mir347,mmu-miR-140-3p,novel_mir330,novel_mir5229,novel_mir1170,novel_mir912,mmu-miR-103-3p,novel_mir1304,novel_mir3706,novel_mir3315,novel_mir4171,novel_mir344,novel_mir2404,novel_mir3692,novel_mir3396,novel_mir1868,novel_mir4398,novel_mir5350,novel_mir55…	6mer	NA	-30.26	165	Sobp	GO:0005634,GO:0046872,GO:0032184,GO:0042472,GO:0007605,GO:0050890,GO:0090102,GO:0007626,	K05748|1|1.7e-17|96.7|fab:101816860|WAS protein family, member 2	gi|117938305|ref|NP_780616.4|	0	sine oculis-binding protein homolog [Mus musculus]
NM_026959.3	novel_mir58,novel_mir4183,mmu-miR-219a-2-3p,novel_mir3977,novel_mir2394,mmu-miR-296-5p,novel_mir3099,novel_mir1259,novel_mir4706,novel_mir1649,novel_mir5277,novel_mir238,novel_mir1763,novel_mir3519,novel_mir3505,novel_mir2429,novel_mir729,novel_mir5580,novel_mir4680,novel_mir4780,novel_mir3627,novel_mir4242,novel_mir1775,novel_mir1042,novel_mir2699,novel_mir3521,novel_mir6148,novel_mir3970,novel_…	7mer-m8	NA	-21.47	156	Stx18	GO:0016021,GO:0000139,GO:0005789,GO:0031201,GO:0005484,GO:0019904,GO:0006890,GO:1902953,GO:0090158,GO:0061025,GO:1903358,GO:0006886,GO:1902117,	K08492|1|2.3e-188|663.3|mmu:71116|syntaxin 18	gi|77736535|ref|NP_081235.2|	0	syntaxin-18 isoform 1 [Mus musculus]
NM_181328.3	novel_mir1922,novel_mir5512,novel_mir5239,novel_mir1010,novel_mir749,novel_mir2815,novel_mir3150,novel_mir3841,novel_mir249,novel_mir5539,novel_mir85,novel_mir235,novel_mir4808,novel_mir1595,mmu-miR-7689-3p,novel_mir116,novel_mir1276,novel_mir1108,novel_mir146,novel_mir4823,novel_mir4380,novel_mir3490,novel_mir750,novel_mir1702,novel_mir3515,novel_mir1169,novel_mir3770,novel_mir2775,mmu-miR-298-5…	7mer-m8	NA	-23.15	145	Slc25a29	GO:0016021,GO:0005743,GO:0015227,GO:0003735,GO:0006412,GO:1902616,	K15109|1|2.4e-172|609.8|mmu:214663|solute carrier family 25 (mitochondrial carnitine/acylcarnitine transporter), member 20/29	gi|31044469|ref|NP_851845.1|	0	mitochondrial basic amino acids transporter [Mus musculus]
NM_009764.3	novel_mir3866,novel_mir5587,novel_mir3609,novel_mir987,novel_mir576,novel_mir1634,novel_mir4649,mmu-miR-200c-3p,novel_mir874,novel_mir5948,novel_mir3496,mmu-miR-154-5p,novel_mir2273,novel_mir5610,novel_mir1006,novel_mir2788,novel_mir1767,novel_mir1129,novel_mir3742,novel_mir2467,novel_mir301,novel_mir245,novel_mir4856,novel_mir585,novel_mir3322,novel_mir439,novel_mir1463,novel_mir2207,novel_mir42…	7mer-1a	NA	-22.02	161	Brca1	-	K10605|1|0.0e+00|3630.5|mmu:12189|breast cancer type 1 susceptibility protein [EC:2.3.2.27]	gi|161016835|ref|NP_033894.3|	0	breast cancer type 1 susceptibility protein homolog [Mus musculus]
XM_006502989.3	novel_mir3897,novel_mir2295,novel_mir4147,novel_mir2828,novel_mir5414,novel_mir1449,novel_mir4529,novel_mir2944,novel_mir901,novel_mir2303,novel_mir1255,novel_mir41,novel_mir616,mmu-miR-378a-3p,novel_mir4502,novel_mir2131,novel_mir4203,novel_mir371,novel_mir722,novel_mir727,novel_mir1581,novel_mir416,novel_mir5076,novel_mir5625,novel_mir813,novel_mir4054,novel_mir316,novel_mir370,novel_mir853,nov…	6mer	NA	-22.02	145	Zfyve9	GO:0046872,	K04679|1|0.0e+00|2364.3|umr:103670715|MAD, mothers against decapentaplegic interacting protein	gi|148698786|gb|EDL30733.1|	0	mCG17975 [Mus musculus]
NM_054042.2	novel_mir4311,novel_mir4749,mmu-miR-204-3p,novel_mir2991,novel_mir4536,novel_mir896,novel_mir468,novel_mir1241,novel_mir109,novel_mir1299,novel_mir1860,novel_mir674,novel_mir1600,novel_mir544,novel_mir2940,novel_mir4685,novel_mir4733,novel_mir2215,novel_mir1150,novel_mir5611,novel_mir3413,novel_mir4376,novel_mir186,novel_mir5706,novel_mir3804,novel_mir858,novel_mir2299,novel_mir1794,mmu-miR-214-3…	7mer-m8	NA	-20.61	146	Cd248	GO:0016021,GO:0070062,GO:0005737,GO:0005886,GO:0005509,GO:0050840,GO:0030246,GO:0016477,GO:0060033,GO:0048535,GO:0008284,GO:2000353,	K06706|1|0.0e+00|1636.3|mmu:70445|CD248 antigen, endosialin	gi|16923944|ref|NP_473383.1|	0	endosialin precursor [Mus musculus]
NM_011374.2	novel_mir5080,novel_mir553,novel_mir1554,novel_mir124,novel_mir264,novel_mir6057,novel_mir785,novel_mir2143,novel_mir4564,novel_mir4247,novel_mir1075,novel_mir4007,novel_mir3082,novel_mir2613,novel_mir3263,novel_mir5609,novel_mir1439,novel_mir2390,novel_mir5984,novel_mir4495,novel_mir5431,novel_mir738,novel_mir115,novel_mir383,novel_mir1712,novel_mir5078,novel_mir161,novel_mir4464,novel_mir440,no…	8mer-1a	NA	-20.41	150	St8sia1	GO:0030173,GO:0003828,GO:0006486,GO:0006665,GO:0008284,GO:0034605,GO:0097503,	K03371|1|2.0e-189|668.7|cfr:102512853|alpha-N-acetyl-neuraminate alpha-2,8-sialyltransferase (sialyltransferase 8A) [EC:2.4.99.8]	gi|70980543|ref|NP_035504.2|	0	alpha-N-acetylneuraminide alpha-2,8-sialyltransferase [Mus musculus]
NM_172601.3	novel_mir2164,novel_mir5062,novel_mir705,novel_mir782,mmu-miR-6971-3p,novel_mir513,novel_mir861,novel_mir632,novel_mir1664,novel_mir1920,novel_mir2256,novel_mir815,novel_mir4697,novel_mir825,novel_mir857,novel_mir2307,novel_mir2653,novel_mir3657,novel_mir11,novel_mir4261,novel_mir28,novel_mir773,novel_mir2431,novel_mir3373,novel_mir169,novel_mir4658,mmu-miR-195a-5p,novel_mir381,novel_mir5346,nove…	7mer-1a	NA	-24.11	144	Rab2b	GO:0070062,GO:0005783,GO:0005794,GO:0005886,GO:0005525,GO:0007264,GO:0045921,GO:0015031,	K07878|1|1.3e-120|438.3|mmu:76338|Ras-related protein Rab-2B	gi|30525051|ref|NP_766189.1|	1.17173e-162	ras-related protein Rab-2B [Mus musculus]
NM_146141.2	novel_mir395,novel_mir4730,novel_mir2090,novel_mir559,novel_mir849,novel_mir5107,novel_mir5116,novel_mir526,novel_mir3569,novel_mir1313,novel_mir1858,novel_mir1746,novel_mir2396,novel_mir346,novel_mir4908,novel_mir1694,novel_mir6043,novel_mir4372,novel_mir3579,mmu-miR-672-5p,novel_mir5234,novel_mir4926,novel_mir4438,mmu-miR-485-5p,novel_mir697,novel_mir3264,novel_mir4500,novel_mir153,novel_mir128…	7mer-m8	NA	-21.9	152	Ppa2	GO:0070062,GO:0005739,GO:0004722,GO:0000287,GO:0004427,GO:0006796,	K01507|1|1.6e-199|699.5|mmu:74776|inorganic pyrophosphatase [EC:3.6.1.1]	gi|651167676|ref|NP_001280570.1|	0	inorganic pyrophosphatase 2, mitochondrial isoform 2 precursor [Mus musculus]
NM_029825.3	novel_mir1151,novel_mir4372,novel_mir2119,mmu-miR-7240-5p,novel_mir2519,novel_mir4737,novel_mir5683,novel_mir4295,novel_mir2703,novel_mir4105,novel_mir453,novel_mir1326	8mer-1a	NA	-25.36	158	Scfd1	GO:0017119,GO:0005801,GO:0005798,GO:0005783,GO:0005886,GO:0047485,GO:0019905,GO:1902902,GO:0006892,GO:0060628,GO:0006890,GO:0051223,GO:1901998,GO:0006904,	K19998|1|0.0e+00|1263.8|mmu:76983|sec1 family domain-containing protein 1	gi|58037481|ref|NP_084101.1|	0	sec1 family domain-containing protein 1 isoform 1 [Mus musculus]
NM_013477.3	novel_mir693,novel_mir4542,novel_mir4017,novel_mir2481,novel_mir558,novel_mir2232,novel_mir1780,mmu-miR-423-5p,novel_mir4202,novel_mir508,novel_mir3025,novel_mir4077,novel_mir3343,novel_mir134,novel_mir4058,novel_mir456,novel_mir1985,novel_mir7,novel_mir1150,novel_mir5852,novel_mir3434,novel_mir4045,novel_mir4909,novel_mir3804,novel_mir1794,novel_mir918,novel_mir44,novel_mir3571,mmu-miR-672-3p,mm…	6mer	NA	-29.24	166	Atp6v0d1	GO:0030670,GO:0043679,GO:0005765,GO:0005813,GO:0016471,GO:0005769,GO:0008021,GO:0070062,GO:0033179,GO:0010008,GO:0016324,GO:0008553,GO:0032403,GO:0033572,GO:0036498,GO:0090383,GO:0008286,GO:0015991,GO:0007420,GO:0016241,	K02146|1|2.8e-203|712.2|mmu:11972|V-type H+-transporting ATPase subunit d	gi|655790980|ref|XP_002711660.2|	0	PREDICTED: V-type proton ATPase subunit d 1 [Oryctolagus cuniculus]
NM_011983.2	novel_mir230,novel_mir347,mmu-miR-5114,novel_mir3472,novel_mir1840,novel_mir5816,mmu-miR-26b-3p,novel_mir1956,novel_mir1314,novel_mir4513,novel_mir3396,novel_mir297,novel_mir2382,novel_mir126,novel_mir5268,novel_mir2915,mmu-miR-103-3p,novel_mir5229,novel_mir4363,novel_mir3989,mmu-miR-298-3p,novel_mir1166,novel_mir4186,novel_mir345,novel_mir6001,novel_mir3167,novel_mir2003,novel_mir1681,novel_mir2…	8mer-1a	NA	-20.91	148	Homer2	-	K15010|1|3.2e-197|694.9|mmu:26557|homer	-	-	-
NM_025402.2	novel_mir2805,novel_mir395,novel_mir4095,novel_mir4730,novel_mir2107,novel_mir1333,novel_mir2060,novel_mir3340,novel_mir3569,novel_mir416,novel_mir6013,novel_mir4337,novel_mir2748,novel_mir5058,novel_mir3742,novel_mir7,novel_mir331,novel_mir4781,novel_mir275,novel_mir5999,novel_mir1237,novel_mir4934,novel_mir2001,mmu-miR-497a-5p,mmu-miR-30c-1-3p,novel_mir3473,novel_mir3649,mmu-miR-362-3p,novel_mi…	8mer-1a	NA	-40.35	291	Ogfod3	GO:0016021,GO:0070062,GO:0031418,GO:0019798,GO:0005506,GO:0043734,GO:0052634,GO:0052635,GO:0018602,GO:0000907,GO:0034792,GO:0055114,	K08134|1|1.5e-10|71.6|sanh:107654364|procollagen-proline 3-dioxygenase 1 [EC:1.14.11.7]	gi|13384786|ref|NP_079678.1|	0	2-oxoglutarate and iron-dependent oxygenase domain-containing protein 3 [Mus musculus]
NM_028132.3	novel_mir130,novel_mir4259,novel_mir2192,novel_mir1953,novel_mir123,novel_mir3413,novel_mir5104,novel_mir5003,novel_mir4411,novel_mir4822,novel_mir1203,novel_mir4413,novel_mir715,novel_mir3707,novel_mir275,novel_mir5076,novel_mir260,novel_mir4116,novel_mir3742,novel_mir35,novel_mir4287,novel_mir2517,novel_mir4752,novel_mir468,novel_mir849,novel_mir696,novel_mir1817,novel_mir622,novel_mir2563,nove…	6mer	NA	-22.43	162	Pgm2	-	K01835|1|0.0e+00|1099.0|mcc:699401|phosphoglucomutase [EC:5.4.2.2]	gi|51593283|gb|AAH80801.1|	0	Pgm2 protein, partial [Mus musculus]
NM_030101.1	novel_mir1624,novel_mir2934,novel_mir745,mmu-miR-6971-3p,novel_mir4677,novel_mir3858,novel_mir2596,novel_mir421,novel_mir5485,novel_mir2292,novel_mir997,novel_mir1428,novel_mir1855,novel_mir1274,novel_mir4673,novel_mir3499,novel_mir3323,novel_mir657,novel_mir1915,novel_mir359,novel_mir4223,novel_mir3217,mmu-miR-880-3p,novel_mir3721	6mer	NA	-22.88	151	Pgpep1l	-	K01304|1|1.1e-45|188.0|mgp:104912870|pyroglutamyl-peptidase [EC:3.4.19.3]	gi|268834721|ref|NP_084377.1|	4.01735e-93	pyroglutamyl-peptidase 1-like protein [Mus musculus]
NM_013808.4	novel_mir5623,novel_mir1369,novel_mir2859,novel_mir3324,novel_mir497,novel_mir315,novel_mir436,novel_mir2427,novel_mir3956,mmu-miR-6954-3p,novel_mir4672,novel_mir1368,novel_mir390,novel_mir1729,novel_mir1940,novel_mir4322,novel_mir527,mmu-miR-450b-5p,novel_mir4500,novel_mir1798,novel_mir1077,novel_mir1620,novel_mir145,novel_mir4398,novel_mir267,novel_mir3225,novel_mir2786,novel_mir4074,novel_mir4…	8mer-1a	NA	-27.1	159	Csrp3	GO:0005856,GO:0030018,GO:0005634,GO:0008270,GO:0061629,GO:0031433,GO:0043426,GO:0042805,GO:0008307,GO:0006874,GO:0060048,GO:0055003,GO:0051091,GO:0003300,GO:0007517,GO:1903919,GO:0035995,GO:0045662,GO:0045944,GO:0045663,GO:0002026,GO:1903920,GO:0033365,GO:0010831,	K09377|1|7.7e-117|424.5|mmu:13009|cysteine and glycine-rich protein	gi|537192590|gb|ERE77362.1|	7.75384e-142	cysteine and glycine-rich protein 3 [Cricetulus griseus]
NM_026410.3	novel_mir392,novel_mir5262,novel_mir4953,novel_mir1752,novel_mir1681,novel_mir3387,novel_mir2699,novel_mir1418,novel_mir1371,novel_mir5251,novel_mir1741,novel_mir654,novel_mir2694,novel_mir3579,novel_mir448,novel_mir4171,novel_mir5281,novel_mir5268,novel_mir1304,novel_mir1461,novel_mir1058,novel_mir1056,mmu-miR-1839-5p,novel_mir4216,novel_mir991,novel_mir325,novel_mir171,novel_mir290,novel_mir660…	7mer-m8	NA	-22.23	141	Cdca5	GO:0005654,GO:0005737,GO:0000790,GO:0005886,GO:0008278,GO:0005515,GO:0003682,GO:0031536,GO:0007080,GO:0007076,GO:0051301,GO:0006302,GO:0071922,GO:0000082,GO:0007064,	K17390|1|1.7e-146|523.9|mmu:67849|sororin	gi|13385902|ref|NP_080686.1|	0	sororin [Mus musculus]
NM_013760.4	novel_mir1359,novel_mir5071,novel_mir4065,novel_mir4526,novel_mir1490,novel_mir4045,novel_mir3609,novel_mir1795,novel_mir5811,novel_mir2886,novel_mir4451,novel_mir2616,novel_mir677,novel_mir1073,novel_mir1894,novel_mir4246,novel_mir2213,novel_mir468,novel_mir4453,novel_mir75,novel_mir1380,novel_mir1817,novel_mir5949,novel_mir3386,novel_mir251,novel_mir5414,novel_mir4359,novel_mir248,novel_mir87,n…	7mer-m8	NA	-25.65	154	Dnajb9	GO:0005730,GO:0070062,GO:0005783,GO:0051787,GO:0030433,	K09515|1|4.5e-128|462.6|mmu:27362|DnaJ homolog subfamily B member 9	gi|148704866|gb|EDL36813.1|	6.09303e-166	DnaJ (Hsp40) homolog, subfamily B, member 9, partial [Mus musculus]
NM_019390.3	novel_mir4685,novel_mir2187,novel_mir2748,novel_mir457,novel_mir1575,novel_mir4219,novel_mir3707,novel_mir5003,novel_mir3413,novel_mir7,novel_mir990,novel_mir2256,mmu-miR-214-3p,mmu-miR-490-5p,novel_mir131,novel_mir5049,novel_mir2638,novel_mir3172,novel_mir242,novel_mir4897,mmu-miR-3057-5p,novel_mir3,novel_mir5595,novel_mir903,novel_mir1346,novel_mir926,novel_mir3976,novel_mir459,novel_mir2168,no…	7mer-m8	NA	-22.39	140	Lmna	GO:0005654,GO:0031965,GO:0005737,GO:0005638,GO:0016363,GO:0031012,GO:0005198,GO:0008157,GO:1904178,GO:0055015,GO:0030334,GO:1900180,GO:0090343,GO:0006998,GO:0072201,GO:0030951,GO:0035105,GO:0030010,GO:2001237,GO:0090201,GO:0045669,	K12641|1|4.5e-251|870.9|mmu:16905|lamin A/C	gi|9506843|ref|NP_062263.1|	0	prelamin-A/C isoform C2 [Mus musculus]
NM_026267.2	novel_mir3521,novel_mir4463,novel_mir1204,novel_mir6148,novel_mir726,novel_mir1894,novel_mir1042,novel_mir327,novel_mir6011,novel_mir5251,novel_mir4481,novel_mir4689,novel_mir700,novel_mir4744,novel_mir4478,novel_mir4926,novel_mir3800,novel_mir437,novel_mir1763,novel_mir4544,novel_mir1793,novel_mir374,mmu-miR-291a-3p,novel_mir4712,novel_mir4737,novel_mir2799,novel_mir5472,novel_mir1813,novel_mir5…	7mer-m8	NA	-21.23	145	Necap1	GO:0030125,GO:0005886,GO:0005905,GO:0005515,GO:0006897,GO:0015031,	K20069|1|3.5e-157|559.7|mmu:67602|adaptin ear-binding coat-associated protein 1/2	gi|27229051|ref|NP_080543.2|	0	adaptin ear-binding coat-associated protein 1 [Mus musculus]
NM_009890.1	novel_mir2871,novel_mir874,novel_mir2755,novel_mir3603,novel_mir4068,novel_mir559,novel_mir3180,mmu-miR-204-3p,novel_mir4685,novel_mir2396,novel_mir2714,novel_mir3521,novel_mir2011,novel_mir198,novel_mir1365,novel_mir5619,novel_mir4597,novel_mir250,novel_mir331,novel_mir4155,novel_mir4783,novel_mir1373,mmu-miR-324-3p,novel_mir1263,novel_mir1137,novel_mir3107,novel_mir4697,mmu-miR-214-3p,novel_mir…	7mer-1a	NA	-22.57	156	Ch25h	GO:0016021,GO:0005789,GO:0001567,GO:0005506,GO:0006633,GO:0055114,GO:0035754,GO:0008203,GO:0016126,	K10223|1|4.0e-158|562.0|rno:309527|cholesterol 25-hydroxylase [EC:1.14.99.38]	gi|6857769|ref|NP_034020.1|	0	cholesterol 25-hydroxylase [Mus musculus]
NM_026403.3	mmu-miR-3077-3p,novel_mir486,novel_mir3429,novel_mir3150,novel_mir1435,novel_mir1446,novel_mir4050,novel_mir2657,novel_mir517,novel_mir3952,mmu-miR-193b-5p,novel_mir4808,novel_mir1572,novel_mir818,novel_mir2089,novel_mir3770,novel_mir4570,novel_mir343,novel_mir662,novel_mir636,novel_mir4189,novel_mir3650,novel_mir3680,novel_mir328,novel_mir3507,novel_mir2043,novel_mir304,novel_mir136,novel_mir399…	6mer	NA	-21.18	143	Nop9	-	K14790|1|0.0e+00|1246.1|mmu:67842|nucleolar protein 9	gi|169646352|ref|NP_080679.3|	0	nucleolar protein 9 [Mus musculus]
NM_001001983.2	mmu-miR-7051-5p,novel_mir59,novel_mir5619,novel_mir457,novel_mir1681,novel_mir4744,novel_mir392,novel_mir4749,novel_mir4223,novel_mir5301,novel_mir3339,novel_mir2290,novel_mir1769,mmu-miR-1947-5p,novel_mir1133,mmu-miR-497a-5p,novel_mir1193,mmu-miR-219a-1-3p,novel_mir3908,novel_mir1561,novel_mir267,novel_mir373,novel_mir950,mmu-miR-322-5p,novel_mir2151,novel_mir5889,mmu-miR-206-3p,novel_mir3179,no…	7mer-1a	NA	-20.2	141	Pi4ka	-	K00888|1|0.0e+00|4117.0|mmu:224020|phosphatidylinositol 4-kinase A [EC:2.7.1.67]	gi|998491021|sp|E9Q3L2.2|PI4KA_MOUSE	0	RecName: Full=Phosphatidylinositol 4-kinase alpha; Short=PI4-kinase alpha; Short=PI4K-alpha; Short=PtdIns-4-kinase alpha
NM_011218.2	novel_mir1065,novel_mir1390,novel_mir59,novel_mir546,novel_mir939,novel_mir5681,novel_mir4034,novel_mir6160,novel_mir3812,novel_mir3076,mmu-miR-3473b,novel_mir2140,novel_mir2629,novel_mir5812,novel_mir3358,mmu-miR-34b-5p,novel_mir653,novel_mir3463,novel_mir1424,novel_mir4783,novel_mir714,novel_mir187,novel_mir3202,novel_mir5407,novel_mir851,novel_mir980,novel_mir1863,novel_mir975,novel_mir4196,no…	6mer	NA	-49.51	302	Ptprs	GO:0016021,GO:0070062,GO:0004725,GO:0005515,GO:0035335,GO:0021510,GO:0021987,GO:0021549,GO:0090557,GO:0007155,GO:0021766,GO:0022038,	K06778|1|0.0e+00|3861.6|mmu:19280|receptor-type tyrosine-protein phosphatase S [EC:3.1.3.48]	gi|356995860|ref|NP_001239382.1|	0	receptor-type tyrosine-protein phosphatase S isoform 2 precursor [Mus musculus]
NM_023844.5	mmu-miR-449a-5p,novel_mir1345,novel_mir2690,mmu-miR-708-5p,novel_mir3277,novel_mir1013,novel_mir1032,novel_mir647,novel_mir454,mmu-miR-470-5p,novel_mir4041,novel_mir1818,novel_mir4475,mmu-miR-741-3p,novel_mir2755,novel_mir8,novel_mir40,novel_mir1276,novel_mir116,novel_mir5907,novel_mir271,novel_mir1465,novel_mir2868,novel_mir336,novel_mir4908,novel_mir5776,novel_mir1405,novel_mir2726,novel_mir326…	6mer	NA	-23.25	157	Jam2	GO:0016021,GO:0005923,GO:0005886,GO:0046982,GO:0007162,	K06735|1|2.7e-169|600.9|mmu:67374|junctional adhesion molecule 2	gi|148747504|ref|NP_076333.3|	0	junctional adhesion molecule B precursor [Mus musculus]
NM_175542.3	novel_mir2156,novel_mir892,novel_mir1956,novel_mir1367,novel_mir2505,novel_mir2370,novel_mir4363,novel_mir1191,novel_mir3472,mmu-miR-5114,novel_mir1121,novel_mir916,novel_mir2644,novel_mir4087,novel_mir5163,novel_mir5251,novel_mir4242,novel_mir2462,novel_mir6028,mmu-miR-7024-5p,novel_mir3190,novel_mir998,novel_mir3332,novel_mir1133,novel_mir1649,novel_mir6080,mmu-miR-877-3p,novel_mir4183,novel_mi…	7mer-1a	NA	-20.5	147	Rttn	-	K16484|1|0.0e+00|4105.1|rno:291377|rotatin	-	-	-
NM_013706.2	novel_mir5301,novel_mir4453,novel_mir4095,novel_mir5203,novel_mir99,novel_mir1688,novel_mir2273,novel_mir62,novel_mir1070,novel_mir5354,novel_mir1019,novel_mir4163,novel_mir457,novel_mir2922,novel_mir4816,novel_mir1681,novel_mir5688,novel_mir271,mmu-miR-92a-1-5p,novel_mir950,novel_mir4045,novel_mir4828,novel_mir1668,novel_mir3800,novel_mir98,novel_mir1512,novel_mir647,novel_mir728,novel_mir5135,n…	7mer-m8	NA	-25.04	152	Cd52	GO:0097225,GO:0031225,GO:0005886,	K06488|1|1.3e-32|143.7|mmu:23833|CDW52 antigen	gi|14719424|ref|NP_038734.1|	2.26659e-44	CAMPATH-1 antigen precursor [Mus musculus]
NM_172260.3	novel_mir4843,novel_mir4598,novel_mir1624,novel_mir4822,novel_mir360,novel_mir7,novel_mir3296,novel_mir5078,novel_mir4576,mmu-miR-320-3p,novel_mir1955,novel_mir5557,novel_mir5639,novel_mir1241,novel_mir366,novel_mir4663,novel_mir2737,novel_mir463,novel_mir544,mmu-miR-378a-5p,novel_mir4685,novel_mir4733,novel_mir5745,novel_mir941,novel_mir6013,novel_mir1600,novel_mir2011,novel_mir903,novel_mir423,…	6mer	NA	-68.61	451	Cep68	GO:0005737,GO:0030054,GO:0005813,GO:0005634,GO:0019904,GO:0019901,GO:0033365,GO:0010457,	K16764|1|0.0e+00|1482.6|mmu:216543|centrosomal protein CEP68	gi|148675886|gb|EDL07833.1|	0	centrosomal protein 68, isoform CRA_b, partial [Mus musculus]
XM_006541137.2	novel_mir2555,novel_mir1353,novel_mir5595,novel_mir4525,mmu-miR-3072-3p,novel_mir4566,novel_mir2168,novel_mir922,novel_mir214,novel_mir4473,novel_mir3318,novel_mir2670,novel_mir702,novel_mir4925,novel_mir183,novel_mir6059,novel_mir1116,novel_mir5784,novel_mir300,novel_mir6114,novel_mir5414,novel_mir242,novel_mir32,novel_mir2137,mmu-miR-205-5p,novel_mir4982,novel_mir86,novel_mir1409,novel_mir5185,…	6mer	NA	-32.27	160	Aen	GO:0031965,GO:0005730,GO:0005654,GO:0003676,GO:0043765,GO:0044824,GO:0004527,GO:0042578,GO:0010212,GO:0042771,	K18340|1|4.8e-193|678.7|mmu:68048|apoptosis-enhancing nuclease [EC:3.1.-.-]	gi|148675139|gb|EDL07086.1|	0	interferon stimulated exonuclease gene 20-like 1, isoform CRA_c, partial [Mus musculus]
NM_146133.3	novel_mir4351,novel_mir2348,novel_mir4539,novel_mir300,novel_mir2838,novel_mir686,novel_mir3172,novel_mir5686,novel_mir2463,novel_mir3667,novel_mir3545,novel_mir3068,novel_mir2555,novel_mir1519,novel_mir2147,novel_mir459,novel_mir2168,novel_mir901,novel_mir4554,novel_mir2296,novel_mir3229,novel_mir788,novel_mir1875,novel_mir794,novel_mir3139,novel_mir69,novel_mir4322,novel_mir561,novel_mir4767,no…	8mer-1a	NA	-20.17	145	Golph3l	GO:0032580,GO:0005802,GO:0070273,GO:0050714,GO:0007030,GO:0048193,	K15620|1|2.6e-159|567.0|cge:100764832|golgi phosphoprotein 3	gi|295054274|ref|NP_666245.2|	0	Golgi phosphoprotein 3-like isoform 1 [Mus musculus]
XM_006514847.3	novel_mir2441,novel_mir2738,novel_mir5551,novel_mir1244,novel_mir2615,novel_mir203,mmu-miR-18a-3p,novel_mir5916,novel_mir2106,novel_mir1662,novel_mir2269,novel_mir1841,novel_mir1287,novel_mir2123,novel_mir348,novel_mir2352,novel_mir1067,novel_mir461,novel_mir482,mmu-miR-326-3p,novel_mir2729,novel_mir3409,novel_mir5614,novel_mir1286,novel_mir4479,novel_mir1402,novel_mir1640,novel_mir1119,novel_mir…	7mer-m8	NA	-78.74	463	Mtmr3	GO:0019898,GO:0005654,GO:0005737,GO:0004438,GO:0046872,GO:0052629,GO:0004722,GO:0004725,GO:0035335,GO:0042149,GO:2000785,GO:0046856,	K18082|1|0.0e+00|2360.5|rno:305482|myotubularin-related protein 3/4 [EC:3.1.3.48 3.1.3.64 3.1.3.95]	gi|158518640|sp|Q8K296.2|MTMR3_MOUSE	0	RecName: Full=Myotubularin-related protein 3; AltName: Full=Phosphatidylinositol-3,5-bisphosphate 3-phosphatase; AltName: Full=Phosphatidylinositol-3-phosphate phosphatase
NM_145533.2	novel_mir2112,novel_mir1582,novel_mir2303,novel_mir3757,novel_mir2800,novel_mir301,novel_mir1494,novel_mir460,novel_mir3633,novel_mir2910,novel_mir5596,novel_mir3206,mmu-miR-328-5p,novel_mir488,novel_mir2838,novel_mir242,novel_mir2177,novel_mir2406,novel_mir4369,novel_mir601,novel_mir153,novel_mir5936,novel_mir1249,novel_mir1460,mmu-miR-1947-5p,novel_mir5483,novel_mir1514,novel_mir397,novel_mir40…	7mer-m8	NA	-20.66	148	Smox	GO:0005737,GO:0005634,GO:0052895,GO:0046592,GO:0052894,GO:0052901,GO:0046208,GO:0055114,	K12259|1|0.0e+00|1149.8|mmu:228608|spermine oxidase [EC:1.5.3.16 1.5.3.-]	gi|568916558|ref|XP_006499354.1|	0	PREDICTED: spermine oxidase isoform X4 [Mus musculus]
NM_199469.2	novel_mir5596,novel_mir4681,novel_mir4144,novel_mir3255,novel_mir129,novel_mir837,novel_mir5833,novel_mir4014,novel_mir2337,novel_mir5995,novel_mir558,novel_mir2481,novel_mir1242,novel_mir1700,novel_mir1537,novel_mir1096,mmu-miR-10b-5p,novel_mir1414,novel_mir3742,novel_mir4304,novel_mir3987,novel_mir2498,novel_mir4201,novel_mir2954,novel_mir118,novel_mir2519,novel_mir3866,novel_mir5549,novel_mir9…	6mer	NA	-22.19	154	Nploc4	GO:0005829,GO:0036501,GO:0034098,GO:0005634,GO:0008270,GO:0070530,GO:0036435,GO:0031625,GO:0032403,GO:0051117,GO:0006511,GO:0030970,GO:0007030,	K14015|1|0.0e+00|1168.3|mmu:217365|nuclear protein localization protein 4 homolog	gi|148702796|gb|EDL34743.1|	0	nuclear protein localization 4 homolog (S. cerevisiae), isoform CRA_a, partial [Mus musculus]
NM_001085378.2	novel_mir136,novel_mir251,novel_mir883,novel_mir87,novel_mir4614,novel_mir1314,novel_mir1166,mmu-miR-24-3p,novel_mir4776,novel_mir56,novel_mir203,novel_mir1215,novel_mir1620,mmu-miR-450a-2-3p,novel_mir1119,novel_mir2402,novel_mir2865,novel_mir5456,novel_mir1363,novel_mir3326,novel_mir4958,novel_mir4456,novel_mir5254,novel_mir385,mmu-miR-93-3p,novel_mir887,novel_mir5084,novel_mir2427,novel_mir3604…	6mer	NA	-26.69	152	Myh7b	GO:0097512,GO:0032982,GO:0016020,GO:0003779,GO:0005524,GO:0003774,	K10352|1|0.0e+00|3654.8|aju:106974268|myosin heavy chain	gi|145864471|ref|NP_001078847.1|	0	myosin-7B [Mus musculus]
NM_175408.4	novel_mir5071,novel_mir4430,novel_mir2430,novel_mir3044,novel_mir4318,novel_mir5292,novel_mir4597,novel_mir410,novel_mir169,novel_mir1764,novel_mir5819,novel_mir6128,novel_mir1766,novel_mir4752,mmu-miR-136-5p,novel_mir3657,novel_mir1333,novel_mir1229,novel_mir862,novel_mir3496,novel_mir3685,novel_mir2203,novel_mir240,novel_mir4027,novel_mir3229,novel_mir4918,novel_mir879,novel_mir1050,novel_mir27…	6mer	NA	-25.74	154	Tmem139	GO:0016021,	-	gi|148352318|ref|NP_780617.2|	1.4799e-154	transmembrane protein 139 [Mus musculus]
NM_025710.2	novel_mir1681,novel_mir806,novel_mir1020,novel_mir5016,novel_mir5858,novel_mir5043,novel_mir921,novel_mir5549,novel_mir5974,novel_mir4706,novel_mir1149,novel_mir2799,novel_mir751,novel_mir4461,novel_mir6033,mmu-miR-25-3p,novel_mir1452,novel_mir129,mmu-miR-30c-1-3p,novel_mir5400,novel_mir4661,novel_mir488,novel_mir1770,novel_mir2677,novel_mir3206,novel_mir1338,novel_mir820,novel_mir347,novel_mir17…	7mer-m8	NA	-22.42	166	Uqcrfs1	GO:0005750,GO:0043209,GO:0008121,GO:0051537,GO:0046872,GO:0032403,GO:0055114,GO:0046677,GO:1902600,GO:0009725,GO:0042493,	K00411|1|6.3e-153|544.7|mmu:66694|ubiquinol-cytochrome c reductase iron-sulfur subunit [EC:7.1.1.8]	gi|13385168|ref|NP_079986.1|	0	cytochrome b-c1 complex subunit Rieske, mitochondrial [Mus musculus]
NM_199307.2	novel_mir782,novel_mir1012,novel_mir935,mmu-miR-324-3p,novel_mir861,novel_mir3705,novel_mir331,novel_mir5618,novel_mir1733,novel_mir736,novel_mir1886,novel_mir5486,novel_mir3657,novel_mir862,novel_mir1377,novel_mir1094,novel_mir2048,novel_mir247,mmu-miR-370-5p,novel_mir1852,novel_mir973,novel_mir381,novel_mir2099,novel_mir1167,novel_mir5492,novel_mir4331,novel_mir3139,novel_mir2358,novel_mir2147,…	6mer	NA	-34.51	158	Ece1	-	K01415|1|0.0e+00|1550.4|mmu:230857|endothelin-converting enzyme [EC:3.4.24.71]	-	-	-
NM_025368.4	novel_mir5984,novel_mir3667,novel_mir2802,novel_mir4619,novel_mir3264,novel_mir3391,novel_mir1458,novel_mir1343,novel_mir183,novel_mir561,novel_mir1171,novel_mir162,novel_mir214,novel_mir3141,novel_mir1626,novel_mir1943,novel_mir1003,novel_mir1519,novel_mir1213,novel_mir3324,novel_mir3483,novel_mir1463,novel_mir2112,novel_mir1565,mmu-miR-22-3p,novel_mir6013,novel_mir1657,novel_mir1129,novel_mir31…	6mer	NA	-20.64	150	Josd2	GO:0005737,GO:0004843,GO:0008242,GO:0016579,	K15235|1|9.5e-103|377.5|mmu:66124|josephin [EC:3.4.19.12]!K06989|2|5.8e-100|368.2|hgl:101725004|aspartate dehydrogenase [EC:1.4.1.21]	gi|13384740|ref|NP_079644.1|	3.50502e-133	josephin-2 [Mus musculus]
NM_172276.3	novel_mir673,novel_mir4741,novel_mir258,novel_mir6001,mmu-miR-341-5p,novel_mir1649,novel_mir1376,novel_mir4453,novel_mir729,novel_mir4068,novel_mir5742,novel_mir3868,novel_mir1694,novel_mir4242,novel_mir2396,novel_mir63,mmu-miR-93-3p,novel_mir315,novel_mir660,novel_mir1157,novel_mir5536,novel_mir1940,novel_mir4212,novel_mir3159,mmu-miR-5114,novel_mir308,novel_mir685,novel_mir2477,novel_mir3113,no…	7mer-m8	NA	-21.07	154	Sfswap	-	K12811|1|1.3e-21|109.8|hmg:100202415|ATP-dependent RNA helicase DDX46/PRP5 [EC:3.6.4.13]!K15176|4|2.3e-18|99.0|pgc:109853448|RNA polymerase-associated protein CTR9	gi|568937805|ref|XP_006504363.1|	0	PREDICTED: splicing factor, suppressor of white-apricot homolog isoform X1 [Mus musculus]
NM_010010.1	novel_mir3114,novel_mir2759,novel_mir124,novel_mir4262,novel_mir423,novel_mir264,novel_mir3086,novel_mir305,novel_mir1623,novel_mir4111,novel_mir45,novel_mir633,novel_mir4013,mmu-let-7e-5p,novel_mir5447,novel_mir1317,novel_mir3919,novel_mir302,novel_mir2215,novel_mir1150,novel_mir7,novel_mir807,novel_mir3413,novel_mir4004,novel_mir1927,novel_mir101,novel_mir1715,novel_mir1825,novel_mir2175,mmu-mi…	8mer-1a	NA	-20.42	146	Cyp46a1	GO:0016021,GO:0005783,GO:0033781,GO:0005506,GO:0020037,GO:0006805,GO:0055114,GO:0006707,	K07440|1|5.6e-292|1007.3|mmu:13116|cholesterol 24-hydroxylase [EC:1.14.14.25]	gi|6753590|ref|NP_034140.1|	0	cholesterol 24-hydroxylase precursor [Mus musculus]
XM_006519187.1	novel_mir4910,novel_mir1287,mmu-miR-7058-5p,novel_mir500,novel_mir5313,novel_mir3854,novel_mir343,novel_mir549,novel_mir5456,novel_mir2240,novel_mir1292,novel_mir1225,novel_mir4005,novel_mir1002,novel_mir1067,novel_mir2352,novel_mir1388,novel_mir1777,novel_mir4956,novel_mir1286,novel_mir4479,novel_mir1574,novel_mir2561,novel_mir2489,novel_mir1276,novel_mir921,novel_mir1714,novel_mir4572,novel_mir…	7mer-1a	NA	-20.39	158	Lmo7	-	K06084|1|0.0e+00|2895.5|mmu:380928|F-box protein 20	gi|157311641|ref|NP_963287.2|	0	LIM domain only protein 7 [Mus musculus]
NM_145615.4	novel_mir2448,novel_mir2309,novel_mir424,novel_mir935,novel_mir4413,mmu-miR-450b-3p,novel_mir4783,novel_mir5512,novel_mir3340,novel_mir3199,novel_mir793,novel_mir1657,novel_mir1365,novel_mir5069,novel_mir3355,novel_mir1371,mmu-miR-3470a,novel_mir3257,novel_mir4752,novel_mir3797,novel_mir1952,novel_mir465,novel_mir5388,novel_mir5892,novel_mir3642,novel_mir436,novel_mir5424,novel_mir5197,novel_mir6…	8mer-1a	NA	-28.56	166	Etfa	GO:0017133,GO:0070062,GO:0003995,GO:0000062,GO:0052890,GO:0009055,GO:0005515,GO:0050660,GO:0006810,GO:0033539,GO:0055088,	K03522|1|5.0e-183|644.8|mmu:110842|electron transfer flavoprotein alpha subunit	gi|227500281|ref|NP_663590.3|	0	electron transfer flavoprotein subunit alpha, mitochondrial [Mus musculus]
NM_177752.4	novel_mir3101,novel_mir7,novel_mir624,novel_mir4318,novel_mir1467,novel_mir5234,novel_mir4746,novel_mir2517,novel_mir1860,novel_mir2036,novel_mir211,novel_mir468,mmu-miR-3084-3p,novel_mir971,novel_mir5741,novel_mir2175,novel_mir346,novel_mir432,novel_mir4105,novel_mir1670,novel_mir2894,novel_mir197,novel_mir5326,novel_mir1003,novel_mir569,novel_mir638,novel_mir162,novel_mir5002,novel_mir1439,nove…	8mer-1a	NA	-25.13	160	Eme1	GO:0048476,GO:0005720,GO:0005737,GO:0004519,GO:0046872,GO:0003677,GO:0005515,GO:0006310,GO:0006281,GO:0072429,	K10882|1|0.0e+00|1134.8|mmu:268465|crossover junction endonuclease EME1 [EC:3.1.22.-]	gi|568974144|ref|XP_006533471.1|	0	PREDICTED: crossover junction endonuclease EME1 isoform X1 [Mus musculus]
NM_009164.3	novel_mir1133,novel_mir4403,novel_mir1428,novel_mir2906,novel_mir159,novel_mir5608,novel_mir698,novel_mir5472,novel_mir4741,novel_mir900,novel_mir6001,novel_mir4706,novel_mir4242,mmu-miR-128-1-5p,novel_mir3934,novel_mir2767,novel_mir1073,novel_mir1894,novel_mir5468,novel_mir4290,novel_mir898,mmu-miR-337-3p,novel_mir3323,mmu-miR-1934-5p,novel_mir687,novel_mir224,novel_mir3472,mmu-miR-5114,novel_mi…	6mer	NA	-21.81	147	Sh3bp1	-	K20652|1|1.9e-275|952.2|rbb:108512840|SH3-domain binding protein 1	gi|940516998|ref|NP_001303613.1|	0	SH3 domain-binding protein 1 isoform 1 [Mus musculus]
NM_008481.2	novel_mir450,novel_mir648,novel_mir1350,novel_mir5173,novel_mir1760,novel_mir5819,novel_mir1737,novel_mir695,novel_mir1586,novel_mir972,novel_mir4515,novel_mir2627,novel_mir5456,novel_mir1027,novel_mir4450,novel_mir595,novel_mir4348,novel_mir4581,novel_mir3196,mmu-miR-500-3p,novel_mir5390,mmu-miR-365-2-5p,novel_mir483,novel_mir2605,novel_mir4249,novel_mir3030,novel_mir2239,novel_mir1748	6mer	NA	-22.66	160	Lama2	-	K05637|1|0.0e+00|5916.3|ngi:103729744|laminin, alpha 1/2	gi|117647249|ref|NP_032507.2|	0	laminin subunit alpha-2 precursor [Mus musculus]
NM_027869.1	novel_mir3388,novel_mir2108,novel_mir2229,novel_mir4565,novel_mir1682,novel_mir886,novel_mir4223,novel_mir4140,novel_mir4533,novel_mir3928,novel_mir779,novel_mir4566,novel_mir1023,novel_mir978,novel_mir3858,novel_mir4023,novel_mir5614,novel_mir4961,novel_mir4652,novel_mir130,novel_mir4322,novel_mir4767,novel_mir205	6mer	NA	-24.83	149	Pnpt1	GO:0016020,GO:0005758,GO:0045025,GO:0034046,GO:0004654,GO:0035198,GO:0008266,GO:0000175,GO:0070584,GO:0000962,GO:0097222,GO:2000772,GO:0061014,GO:0071042,GO:0045926,GO:0090503,GO:0071850,GO:0035458,GO:0035928,GO:0043457,GO:2000627,GO:0000958,GO:0034599,GO:0000964,GO:0070207,	K00962|1|0.0e+00|1536.2|mmu:71701|polyribonucleotide nucleotidyltransferase [EC:2.7.7.8]	gi|25188204|ref|NP_082145.1|	0	polyribonucleotide nucleotidyltransferase 1, mitochondrial precursor [Mus musculus]
NM_029239.3	novel_mir1241,novel_mir5354,novel_mir2737,novel_mir5154,novel_mir432,mmu-miR-17-3p,novel_mir830,novel_mir941,novel_mir19,novel_mir1959,mmu-miR-22-3p,novel_mir2442,novel_mir564,novel_mir419,novel_mir680,novel_mir1214,mmu-miR-214-3p,novel_mir4409,novel_mir4746,novel_mir1439,novel_mir633,novel_mir5564,novel_mir447,novel_mir4897,novel_mir1317,novel_mir2584,novel_mir5090,novel_mir206,novel_mir1264,nov…	6mer	NA	-23.28	156	Prkd3	GO:0005654,GO:0005737,GO:0016020,GO:0046872,GO:0005524,GO:0004697,GO:0006468,GO:0035556,	K06070|1|0.0e+00|1820.4|mmu:75292|protein kinase D [EC:2.7.11.13]	gi|27753989|ref|NP_083515.2|	0	serine/threonine-protein kinase D3 isoform 2 [Mus musculus]
NM_013686.4	mmu-miR-744-5p,novel_mir997,novel_mir3000,novel_mir3662,novel_mir5725,novel_mir718,novel_mir2859,novel_mir5731,novel_mir1157,novel_mir126,novel_mir2685,novel_mir1314,mmu-miR-130b-3p,novel_mir911,novel_mir330,mmu-miR-185-5p,novel_mir3778,novel_mir3495,novel_mir5982,novel_mir4390,novel_mir1740,novel_mir2438,novel_mir1585,novel_mir5608,novel_mir5472,novel_mir759,novel_mir900,novel_mir2528,novel_mir4…	7mer-m8	NA	-21.05	151	Tcp1	GO:0001669,GO:0044297,GO:0005832,GO:0043209,GO:0005794,GO:0005874,GO:0005720,GO:0000242,GO:0070062,GO:0002199,GO:0031625,GO:0051082,GO:0005524,GO:0044053,GO:0006457,GO:1904851,GO:0032212,GO:0050821,GO:0051973,GO:1904874,GO:2000109,GO:0007339,GO:1904871,GO:1901998,GO:0090666,	K09493|1|3.8e-311|1071.2|mmu:21454|T-complex protein 1 subunit alpha	gi|110625624|ref|NP_038714.2|	0	T-complex protein 1 subunit alpha isoform 1 [Mus musculus]
XM_006503928.2	novel_mir3687,novel_mir1314,novel_mir5889,novel_mir126,novel_mir297,novel_mir4726,novel_mir4217,novel_mir1461,novel_mir1166,novel_mir3989,mmu-miR-134-5p,novel_mir3400,novel_mir227,mmu-miR-135b-5p,novel_mir347,novel_mir230,mmu-miR-140-3p,mmu-miR-130b-5p,novel_mir4705,novel_mir4396,mmu-miR-486a-3p,novel_mir5376,novel_mir3702,novel_mir310,novel_mir4463,novel_mir1869,novel_mir3868,novel_mir5840,novel…	7mer-m8	NA	-43.23	324	Cpeb2	-	K02602|1|0.0e+00|2072.7|mmu:231207|cytoplasmic polyadenylation element-binding protein	gi|568934174|ref|XP_006503994.1|	0	PREDICTED: cytoplasmic polyadenylation element-binding protein 2 isoform X5 [Mus musculus]
NM_146245.2	novel_mir986,novel_mir2905,novel_mir4017,novel_mir2894,novel_mir5194,novel_mir4014,novel_mir2091,novel_mir129,novel_mir5389,novel_mir3361,novel_mir1317,novel_mir2137,novel_mir1030,novel_mir4077,novel_mir183,novel_mir4351,mmu-miR-214-3p,novel_mir2192,novel_mir770,novel_mir5888,novel_mir4576,novel_mir4598,novel_mir705,novel_mir4989,novel_mir3599,novel_mir4685,novel_mir3742,novel_mir1648,novel_mir27…	6mer	NA	-24.11	161	Lrit1	GO:0030176,	K16357|1|1.6e-27|129.8|bfo:BRAFLDRAFT_84652|leucine-rich repeat and fibronectin type-III domain-containing protein 4!K16358|2|2.0e-22|112.8|bpec:110168300|leucine-rich repeat and fibronectin type-III domain-containing protein 5	gi|158517913|ref|NP_666357.2|	0	leucine-rich repeat, immunoglobulin-like domain and transmembrane domain-containing protein 1 precursor [Mus musculus]
NM_009673.2	novel_mir2626,novel_mir916,novel_mir1720,novel_mir5749,novel_mir549,novel_mir2554,novel_mir509,novel_mir347,novel_mir1292,novel_mir1673,novel_mir500,novel_mir975,novel_mir4323,novel_mir4189,novel_mir1338,novel_mir369,novel_mir1809,novel_mir2123,mmu-miR-674-5p,novel_mir3518,novel_mir1113,novel_mir3248,novel_mir577,novel_mir5807,novel_mir4155,novel_mir3557,mmu-miR-9-5p,novel_mir2105,novel_mir4665,n…	8mer-1a	NA	-20.25	164	Anxa5	GO:0005925,GO:0005783,GO:0072563,GO:0043679,GO:0005829,GO:0042383,GO:0043204,GO:0070062,GO:0009897,GO:0030425,GO:0030018,GO:0014704,GO:0005634,GO:0008021,GO:0005388,GO:0030971,GO:0017046,GO:0005544,GO:0005509,GO:0043065,GO:0030195,GO:1901317,GO:0098779,GO:1902721,GO:0051260,GO:0051592,GO:0098792,GO:0002230,GO:0097211,	K16646|1|3.6e-164|582.4|biu:109560209|annexin A5	gi|6753060|ref|NP_033803.1|	0	annexin A5 [Mus musculus]
NM_133878.3	novel_mir4783,novel_mir267,novel_mir1856,novel_mir3077,novel_mir2583,novel_mir4067,novel_mir333,novel_mir3233,novel_mir4553,novel_mir1964,novel_mir1928,mmu-miR-486b-3p,novel_mir4074,novel_mir2297,novel_mir787,novel_mir5307,novel_mir5812,novel_mir5771,novel_mir1824,novel_mir4096,novel_mir307,novel_mir433,novel_mir713,novel_mir5615,novel_mir1451,novel_mir909,novel_mir546,novel_mir939,novel_mir1005,…	7mer-m8	NA	-32.58	158	Rcc1	GO:0031965,GO:0000790,GO:0000794,GO:0005654,GO:0005737,GO:0042393,GO:0031492,GO:0005087,GO:0051225,GO:0007059,GO:0007052,GO:0051301,GO:0000082,GO:0007088,	K11493|1|9.4e-245|850.5|mmu:100088|regulator of chromosome condensation	gi|148698161|gb|EDL30108.1|	0	regulator of chromosome condensation 1, isoform CRA_c [Mus musculus]
NM_010761.2	novel_mir4023,novel_mir4804,novel_mir6060,novel_mir5529,novel_mir4746,novel_mir647,novel_mir1512,novel_mir3019,novel_mir3589,novel_mir5742,novel_mir773,novel_mir3521,novel_mir2699,novel_mir2887,mmu-miR-7091-3p,mmu-miR-10a-5p,novel_mir2396,novel_mir683,novel_mir1790,novel_mir2767,novel_mir3386,novel_mir764,novel_mir693,novel_mir1157,novel_mir4855,novel_mir158,novel_mir1780,novel_mir3898,novel_mir4…	7mer-1a	NA	-25.08	159	Ccndbp1	GO:0005654,GO:0005737,GO:0051726,	K21626|1|1.2e-198|696.8|mmu:17151|cyclin-D1-binding protein 1	gi|568915649|ref|XP_006498914.1|	0	PREDICTED: cyclin-D1-binding protein 1 isoform X1 [Mus musculus]
NM_008293.4	novel_mir118,mmu-miR-871-3p,novel_mir831,novel_mir4183,novel_mir4023,novel_mir832,novel_mir1133,mmu-miR-497a-5p,novel_mir1811,novel_mir4535,mmu-miR-214-3p,novel_mir1941,novel_mir605,novel_mir4749,novel_mir3205,novel_mir5251,novel_mir1482,novel_mir690,novel_mir1276,novel_mir260,novel_mir3546,novel_mir5542,novel_mir1235,novel_mir146,novel_mir607,novel_mir2481,novel_mir4380,novel_mir2905,novel_mir25…	6mer	NA	-28.2	150	Hsd3b1	GO:0016021,GO:0005758,GO:0030061,GO:0005789,GO:0005496,GO:0051287,GO:0004769,GO:0035410,GO:0003854,GO:0046685,GO:0021766,GO:0061370,GO:0006082,GO:0018894,GO:0010288,GO:0046470,GO:0030851,GO:0044344,GO:0018879,GO:0006701,GO:0009635,GO:0071236,GO:0017143,GO:0071549,GO:0045471,GO:0043279,GO:0070301,GO:0060135,GO:0051592,GO:0071560,GO:0032869,GO:0010226,GO:0071406,GO:0033591,GO:0018970,GO:0018958,GO:…	K00070|1|2.4e-190|669.5|rno:360348|3beta-hydroxy-Delta5-steroid dehydrogenase / steroid Delta-isomerase [EC:1.1.1.145 5.3.3.1]	gi|6680289|ref|NP_032319.1|	0	3 beta-hydroxysteroid dehydrogenase/Delta 5-->4-isomerase type 1 [Mus musculus]
NM_001290986.1	novel_mir469,novel_mir5342,novel_mir5692,novel_mir2533,novel_mir4948,novel_mir3235,novel_mir3920,novel_mir855,novel_mir183,novel_mir4489,mmu-miR-378a-3p,novel_mir1729,novel_mir760,novel_mir3318,novel_mir182,novel_mir3188,novel_mir2460,novel_mir1626,novel_mir788,novel_mir2973,novel_mir1565,novel_mir2549,novel_mir2586,novel_mir4083,novel_mir1575,novel_mir394,novel_mir1186,novel_mir1758,novel_mir133…	7mer-m8	NA	-44.72	296	Wdr76	GO:0006974,	K10140|1|2.5e-17|95.9|rss:109440541|DNA damage-binding protein 2	gi|206558258|sp|A6PWY4.1|WDR76_MOUSE	0	RecName: Full=WD repeat-containing protein 76
NM_028518.1	novel_mir1119,novel_mir970,novel_mir2541,novel_mir496,novel_mir1216,novel_mir5325,novel_mir4837,mmu-miR-326-3p,novel_mir482,novel_mir2379,mmu-miR-338-3p,novel_mir1907,novel_mir4479,novel_mir5524,novel_mir3883,novel_mir608,novel_mir1662,novel_mir3005,novel_mir2269,novel_mir4189,novel_mir2161,novel_mir3650,novel_mir975,novel_mir645,novel_mir278,novel_mir5504,novel_mir365,novel_mir2426,mmu-miR-28a-5…	6mer	NA	-23.03	157	Col20a1	-	K16628|1|2.0e-75|288.9|nle:100592937|collagen, type VII, alpha	gi|568920453|ref|XP_006500789.1|	0	PREDICTED: collagen alpha-1(XX) chain isoform X3 [Mus musculus]
NM_178186.3	novel_mir1870,novel_mir1591,novel_mir404,novel_mir603,novel_mir1814,novel_mir453,novel_mir220,novel_mir3567,novel_mir316,novel_mir1450,novel_mir3138,novel_mir3741,novel_mir744,novel_mir2822,novel_mir637,novel_mir295	8mer-1a	NA	-23.34	156	Hist1h2ag	GO:0000786,GO:0000790,GO:0070062,GO:0019899,GO:0003677,GO:0046982,GO:0008285,GO:0006342,	K11251|1|2.7e-66|255.4|ccan:109677255|histone H2A	gi|10645195|ref|NP_066390.1|	5.9117e-88	histone H2A type 1-B/E [Homo sapiens]
NM_172766.3	novel_mir2453,novel_mir4259,novel_mir5426,novel_mir1953,novel_mir535,mmu-miR-6971-3p,novel_mir4361,mmu-miR-505-5p,novel_mir2310,novel_mir5531,novel_mir1711,novel_mir416,novel_mir5076,novel_mir4597,novel_mir394,novel_mir382,novel_mir3511,novel_mir559,novel_mir722,novel_mir573,novel_mir2765,novel_mir3664,novel_mir681,novel_mir696,novel_mir1366,novel_mir4127,novel_mir2476,novel_mir4900,novel_mir2303…	6mer	NA	-21.78	161	Nfrkb	GO:0031011,GO:0005654,GO:0003677,GO:0002020,GO:0006310,GO:0006281,GO:0006355,	K11671|1|0.0e+00|2524.6|mmu:235134|nuclear factor related to kappa-B-binding protein	gi|568959269|ref|XP_006510282.1|	0	PREDICTED: nuclear factor related to kappa-B-binding protein isoform X2 [Mus musculus]
NM_013481.1	novel_mir680,novel_mir512,novel_mir6091,novel_mir2307,novel_mir211,novel_mir5116,novel_mir1648,novel_mir4477,novel_mir4749,novel_mir945,novel_mir2175,novel_mir5259,novel_mir253,novel_mir144,novel_mir5291,novel_mir1670,novel_mir5401,novel_mir416,novel_mir2973,novel_mir5778,novel_mir4831,novel_mir2681,novel_mir2197,novel_mir3004,novel_mir5494,novel_mir3318,novel_mir137,mmu-miR-328-5p,novel_mir1030,…	7mer-m8	NA	-23.17	155	Bop1	GO:0070545,GO:0030687,GO:0005654,GO:0005737,GO:0043021,GO:0005515,GO:0051726,GO:0008283,GO:0000448,	K14824|1|0.0e+00|1509.6|mmu:12181|ribosome biogenesis protein ERB1	gi|7304931|ref|NP_038509.1|	0	ribosome biogenesis protein BOP1 [Mus musculus]
NM_026444.3	novel_mir169,novel_mir945,novel_mir722,novel_mir1046,novel_mir4203,novel_mir3664,novel_mir4785,novel_mir382,novel_mir1127,novel_mir1556,novel_mir691,novel_mir1490,novel_mir2256,novel_mir2453,novel_mir316,novel_mir1054,novel_mir2530,novel_mir853,novel_mir3391,novel_mir192,novel_mir3897,novel_mir4161,novel_mir140,novel_mir2019,novel_mir1197,novel_mir5183,novel_mir3860,novel_mir1449,novel_mir1817,no…	7mer-m8	NA	-21.7	157	Cs	GO:0043005,GO:0031594,GO:0044853,GO:0005759,GO:0031514,GO:0005952,GO:0070062,GO:0097546,GO:0048471,GO:0005794,GO:0005813,GO:0016607,GO:0031625,GO:0004712,GO:0004691,GO:0017137,GO:0032403,GO:0004108,GO:0005524,GO:0019901,GO:0034237,GO:0001843,GO:0008284,GO:0006101,GO:0071158,GO:0001707,GO:2000810,GO:0043457,GO:0046827,GO:0018107,GO:1901621,GO:0006107,GO:0048240,GO:0006084,GO:0051966,GO:0071333,GO:…	K01647|1|1.5e-271|939.9|mmu:12974|citrate synthase [EC:2.3.3.1]	gi|13385942|ref|NP_080720.1|	0	citrate synthase, mitochondrial precursor [Mus musculus]
NM_028306.3	mmu-miR-532-3p,novel_mir5008,novel_mir2215,novel_mir3866,novel_mir735,novel_mir4464,novel_mir2442,novel_mir4909,novel_mir823,novel_mir178,novel_mir5234,mmu-miR-6991-3p,novel_mir123,mmu-miR-320-3p,novel_mir4062,novel_mir4452,novel_mir1240,novel_mir2474,novel_mir2060,novel_mir4205,novel_mir4386,mmu-miR-1895,novel_mir5354,novel_mir1230,novel_mir377,novel_mir2887,novel_mir4049,novel_mir585,novel_mir1…	6mer	NA	-20.45	147	Hspa12b	GO:0005524,	K10609|1|4.3e-32|144.4|amex:111188264|cullin 4	gi|21312236|ref|NP_082582.1|	0	heat shock 70 kDa protein 12B [Mus musculus]
NM_010102.2	novel_mir2710,novel_mir983,novel_mir1701,novel_mir393,novel_mir3325,novel_mir168,novel_mir1166,novel_mir1277,novel_mir2126,novel_mir522,novel_mir1971,novel_mir1165,novel_mir2402,novel_mir5579,novel_mir3475,novel_mir5749,novel_mir1201,novel_mir450,novel_mir4188,novel_mir3739,novel_mir2561,novel_mir5251,novel_mir1065,novel_mir3689,novel_mir3952,novel_mir1019,novel_mir653,novel_mir4050,novel_mir520,…	8mer-1a	NA	-20.92	156	S1pr4	GO:0005887,GO:0038036,GO:0007189,	K04293|1|9.9e-221|770.8|mmu:13611|sphingosine 1-phosphate receptor 4	gi|6753718|ref|NP_034232.1|	0	sphingosine 1-phosphate receptor 4 [Mus musculus]
NM_029766.3	novel_mir1771,mmu-miR-18a-3p,novel_mir2029,novel_mir2573,novel_mir1018,novel_mir425,novel_mir3191,novel_mir2806,novel_mir4516,novel_mir1583,novel_mir5313,novel_mir662,novel_mir3923,novel_mir523,novel_mir970,mmu-miR-298-5p,novel_mir1292,novel_mir3231,novel_mir522,novel_mir2240,novel_mir461,novel_mir1489,novel_mir3409,novel_mir1067,novel_mir5579,novel_mir1526,novel_mir5614,novel_mir4684,novel_mir13…	6mer	NA	-24.81	160	Dtl	-	K11790|1|0.0e+00|1493.8|mmu:76843|denticleless	gi|31982955|ref|NP_084042.1|	0	denticleless protein homolog isoform 1 [Mus musculus]
NM_010015.4	novel_mir1495,novel_mir6150,novel_mir1488,novel_mir1081,novel_mir3485,novel_mir3329,novel_mir1003,novel_mir3088,novel_mir2969,novel_mir2800,novel_mir5218,mmu-miR-339-3p,novel_mir2091,novel_mir1056,novel_mir418,mmu-miR-8112,novel_mir3263,novel_mir2850,novel_mir4500,novel_mir5784,novel_mir3069,novel_mir6,novel_mir2306,novel_mir5690,novel_mir1322,novel_mir1263,novel_mir1877,novel_mir9,novel_mir267,n…	7mer-1a	NA	-27.5	166	Dad1	GO:0016021,GO:0008250,GO:0070062,GO:0004579,GO:0018279,GO:0007584,GO:0001824,GO:0042493,GO:0043066,	K12668|1|5.0e-56|224.2|cfr:102521848|oligosaccharyltransferase complex subunit epsilon	gi|4503253|ref|NP_001335.1|	7.34032e-76	dolichyl-diphosphooligosaccharide--protein glycosyltransferase subunit DAD1 [Homo sapiens]
NM_009959.1	novel_mir5128,novel_mir414,novel_mir5117,novel_mir311,novel_mir4372,novel_mir2386,mmu-miR-1193-3p,novel_mir3733,novel_mir1503,novel_mir20,novel_mir2601,novel_mir929,novel_mir499,novel_mir890,novel_mir5819,novel_mir1415,novel_mir5952,novel_mir2273,novel_mir5827,novel_mir4205,novel_mir1230,novel_mir964,novel_mir1670,novel_mir410,novel_mir3742,mmu-miR-7051-5p,novel_mir1129,novel_mir3976,novel_mir433…	7mer-1a	NA	-32.24	167	Pcdha5	GO:0005886,GO:0016021,GO:0005783,GO:0045202,GO:0005509,GO:0042476,GO:0007156,	K16493|1|0.0e+00|1627.1|pon:100173497|protocadherin alpha	gi|20137002|ref|NP_034089.1|	0	protocadherin alpha-5 precursor [Mus musculus]
NM_011990.2	novel_mir3282,novel_mir5414,novel_mir2932,novel_mir3897,novel_mir1343,novel_mir5721,novel_mir697,novel_mir3391,novel_mir2476,novel_mir893,novel_mir444,novel_mir3324,novel_mir2258,novel_mir4529,novel_mir926,novel_mir1255,novel_mir253,novel_mir4738,novel_mir5076,novel_mir2654,novel_mir2765,novel_mir5459,novel_mir5465,novel_mir6120,novel_mir559,novel_mir2530,mmu-miR-20b-5p,novel_mir578,novel_mir6091…	6mer	NA	-52.47	311	Slc7a11	GO:0005856,GO:0009986,GO:0005887,GO:0005791,GO:0015327,GO:0070527,GO:0009636,GO:0003333,GO:0089711,	K13869|1|1.2e-261|908.7|rro:104674896|solute carrier family 7 (L-type amino acid transporter), member 11	gi|6756011|ref|NP_036120.1|	0	cystine/glutamate transporter [Mus musculus]
NM_009041.3	novel_mir264,novel_mir1213,novel_mir305,novel_mir2923,mmu-miR-7052-3p,novel_mir5080,mmu-miR-210-3p,novel_mir3785,novel_mir1469,novel_mir488,novel_mir540,novel_mir134,novel_mir407,novel_mir5090,novel_mir115,novel_mir5447,novel_mir5237,novel_mir3811,mmu-miR-210-5p,mmu-let-7b-5p,novel_mir3381,novel_mir3296,novel_mir3617,novel_mir269,novel_mir44,novel_mir4015,novel_mir1794,novel_mir178,novel_mir205,n…	7mer-m8	NA	-21.32	142	Rdx	GO:0005925,GO:0016324,GO:0032420,GO:0030496,GO:0030027,GO:0030315,GO:0005615,GO:0019898,GO:0030175,GO:0030864,GO:0043209,GO:0070062,GO:0032154,GO:0005913,GO:0051286,GO:0005902,GO:0001726,GO:0042803,GO:0051117,GO:0098641,GO:0019904,GO:0003779,GO:0061028,GO:0034111,GO:2000643,GO:1903392,GO:0032231,GO:1902115,GO:1903364,GO:1900027,GO:0097067,GO:1900087,GO:0045176,GO:0034260,GO:0051016,GO:0030335,GO:…	K05762|1|0.0e+00|1146.3|rno:315655|radixin	gi|74224118|dbj|BAE33689.1|	0	unnamed protein product [Mus musculus]
XM_006533302.1	novel_mir3155,novel_mir2128,novel_mir1621,novel_mir661,novel_mir1898,novel_mir1157,novel_mir2590,novel_mir679,novel_mir1695,novel_mir554,novel_mir894,novel_mir2703,novel_mir1277,novel_mir2834,novel_mir3662,novel_mir3100,novel_mir1770,novel_mir763,novel_mir4217,novel_mir413,novel_mir168,novel_mir303,novel_mir3677,novel_mir297,mmu-miR-98-5p,novel_mir2016,novel_mir87,novel_mir1632,novel_mir2413,nove…	6mer	NA	-20.74	144	Med24	GO:0016592,GO:0000151,GO:0046966,GO:0004402,GO:0001104,GO:0003713,GO:0004872,GO:0061630,GO:0045893,GO:0006367,GO:0051291,GO:0019827,GO:0030521,GO:0016567,	K15167|1|0.0e+00|1958.7|ngi:103731113|mediator of RNA polymerase II transcription subunit 24	gi|568973917|ref|XP_006533365.1|	0	PREDICTED: mediator of RNA polymerase II transcription subunit 24 isoform X2 [Mus musculus]
NM_133190.2	mmu-miR-324-5p,novel_mir4348,mmu-miR-486b-3p,mmu-miR-370-3p,novel_mir199,novel_mir835,novel_mir4535,novel_mir3277,novel_mir5812,novel_mir4268,novel_mir3358,novel_mir4296,novel_mir4699,novel_mir4164,novel_mir4670,novel_mir818,novel_mir546,novel_mir5681,novel_mir3500,novel_mir644,novel_mir1292,novel_mir3231,novel_mir650,novel_mir2352,novel_mir4958,novel_mir142,novel_mir608,novel_mir304,novel_mir405…	6mer	NA	-20.69	143	Cacng8	GO:0030054,GO:0045211,GO:0032281,GO:0014069,GO:0005245,GO:0005515,GO:0016247,GO:0070588,GO:0019226,GO:2000311,	K04873|1|1.1e-254|882.9|ccan:109693145|voltage-dependent calcium channel gamma-8	gi|953768336|ref|NP_573453.2|	0	voltage-dependent calcium channel gamma-8 subunit [Mus musculus]
NM_178695.5	novel_mir1340,novel_mir2123,novel_mir3449,novel_mir425,novel_mir1273,novel_mir1403,novel_mir270,novel_mir2582,novel_mir5457,novel_mir2587,novel_mir644,novel_mir5121,mmu-miR-297a-5p,mmu-miR-330-3p,novel_mir3515,novel_mir4108,novel_mir2537,novel_mir3622,novel_mir4643,novel_mir546,novel_mir1571,novel_mir6124,novel_mir1874,novel_mir4041,novel_mir4994,novel_mir8,novel_mir298,novel_mir199,novel_mir3358…	7mer-m8	NA	-20.92	160	Prrg4	GO:0005576,GO:0016021,GO:0005509,	-	gi|224994242|ref|NP_848810.3|	4.44854e-167	transmembrane gamma-carboxyglutamic acid protein 4 precursor [Mus musculus]
NM_009191.3	novel_mir2526,novel_mir4539,novel_mir4925,novel_mir4615,novel_mir155,novel_mir506,novel_mir2912,novel_mir5318,novel_mir32,novel_mir744,novel_mir5679,novel_mir184,novel_mir4831,novel_mir3210,novel_mir986,novel_mir4645,novel_mir4101,novel_mir666,novel_mir5845,novel_mir395,novel_mir4116,novel_mir2433,novel_mir3671,novel_mir3546,novel_mir52,novel_mir3574,novel_mir5062,novel_mir3481,novel_mir3416,nove…	7mer-m8	NA	-20.41	147	Clpb	GO:0005739,GO:0016887,GO:0005524,GO:0034605,	K03695|1|0.0e+00|1354.0|mmu:20480|ATP-dependent Clp protease ATP-binding subunit ClpB	gi|6677983|ref|NP_033217.1|	0	caseinolytic peptidase B protein homolog [Mus musculus]
NM_177564.5	novel_mir251,novel_mir608,novel_mir3253,novel_mir1613,novel_mir127,novel_mir4520,novel_mir4648,novel_mir66,novel_mir865,novel_mir1863,novel_mir202,novel_mir203,novel_mir278,novel_mir2465,novel_mir3536,novel_mir4596,novel_mir5879,novel_mir1441,novel_mir461,novel_mir5558,novel_mir1907,novel_mir3490,novel_mir764,novel_mir5703,novel_mir2219,novel_mir677,novel_mir546,novel_mir6124,mmu-miR-188-5p,novel…	6mer	NA	-63.08	321	Dhrs11	GO:0005576,GO:0018450,GO:0045703,GO:0034871,GO:0018449,GO:0034868,GO:0034778,GO:0018448,GO:0034944,GO:0034522,GO:0018447,GO:0042469,GO:0034821,GO:0034847,GO:0034817,GO:0034918,GO:0034901,GO:0034582,GO:0034891,GO:0018446,GO:0034863,GO:0055114,	K22970|1|1.5e-152|543.5|ngi:103732605|17beta-estradiol 17-dehydrogenase / 3beta-hydroxysteroid 3-dehydrogenase [EC:1.1.1.62 1.1.1.270]	gi|109715818|ref|NP_808232.2|	0	dehydrogenase/reductase SDR family member 11 precursor [Mus musculus]
NM_024221.3	novel_mir717,novel_mir5352,novel_mir4828,mmu-miR-370-3p,novel_mir734,novel_mir873,novel_mir1028,novel_mir2629,novel_mir419,mmu-miR-449a-5p,novel_mir18,novel_mir5856,novel_mir1696,novel_mir177,novel_mir1651,novel_mir5273,novel_mir5446,novel_mir1005,novel_mir5271,novel_mir2103,novel_mir2560,novel_mir2439,novel_mir4685,novel_mir247,novel_mir4270,novel_mir3280,novel_mir1371,novel_mir971,novel_mir3714…	7mer-m8	NA	-20.1	147	Pdhb	GO:0070062,GO:0045254,GO:0005759,GO:0005654,GO:0004739,GO:0034604,GO:0061732,GO:0006099,GO:0006006,	K00162|1|1.8e-204|716.1|mmu:68263|pyruvate dehydrogenase E1 component beta subunit [EC:1.2.4.1]	gi|18152793|ref|NP_077183.1|	0	pyruvate dehydrogenase E1 component subunit beta, mitochondrial precursor [Mus musculus]
NM_172618.2	novel_mir51,novel_mir1530,novel_mir6083,novel_mir2497,novel_mir2287,novel_mir4769,mmu-miR-7240-5p,novel_mir5317,novel_mir5770,novel_mir171,novel_mir758,novel_mir1209,novel_mir768,novel_mir1232,novel_mir2527,novel_mir989,novel_mir1246,novel_mir282,novel_mir238,novel_mir3019,novel_mir3497,novel_mir5337,novel_mir659,novel_mir2394,novel_mir2942,novel_mir442,novel_mir3977,novel_mir4665,novel_mir832,no…	6mer	NA	-22.48	150	Btbd9	GO:0005737,GO:0019005,GO:0031625,GO:0042748,GO:0042428,GO:0030162,GO:0050951,GO:0042787,GO:1900242,GO:0060586,GO:0007616,GO:0043161,GO:0050804,GO:0008344,	K10481|1|0.0e+00|1249.2|mmu:224671|BTB/POZ domain-containing protein 9	gi|27819604|ref|NP_766206.1|	0	BTB/POZ domain-containing protein 9 [Mus musculus]
NM_130867.3	novel_mir1276,novel_mir2182,novel_mir1572,novel_mir6026,novel_mir2219,novel_mir1873,novel_mir4808,novel_mir3952,novel_mir5540,novel_mir1206,novel_mir4673,novel_mir2755,novel_mir4050,novel_mir717,novel_mir188,novel_mir1435,novel_mir1013,novel_mir5685,mmu-miR-6953-3p,novel_mir2545,novel_mir179,mmu-miR-1199-5p,novel_mir254,novel_mir2994,novel_mir4922,novel_mir4520,novel_mir1281,novel_mir304,novel_mi…	6mer	NA	-20.66	154	Kirrel	GO:0016021,GO:0070062,GO:0031253,GO:0005911,GO:0045121,GO:0043198,GO:0048471,GO:0017022,GO:0001933,GO:0007588,GO:0030838,	K18273|1|6.1e-72|278.1|asn:102383405|alpha-tectorin!K17341|3|5.2e-31|142.1|spis:111337992|hemicentin	gi|568921951|ref|XP_006501139.1|	0	PREDICTED: kin of IRRE-like protein 1 isoform X2 [Mus musculus]
XM_006499301.1	novel_mir2530,novel_mir5296,novel_mir1794,novel_mir3931,novel_mir570,novel_mir5829,mmu-miR-532-3p,novel_mir1556,novel_mir5177,novel_mir5477,novel_mir103,novel_mir973,novel_mir4914,novel_mir4275,novel_mir4816,novel_mir3546,novel_mir3340,novel_mir109,novel_mir3749,novel_mir1425,novel_mir4800,mmu-miR-1964-3p,novel_mir6120,novel_mir4407,novel_mir1096,novel_mir3754,novel_mir2894,novel_mir3086,novel_mi…	8mer-1a	NA	-28.13	163	Nkx2-4	GO:0005634,GO:0043565,GO:0007275,GO:0006355,	K09344|1|1.4e-175|620.2|mmu:228731|homeobox protein Nkx-2.4	gi|568916580|ref|XP_006499364.1|	0	PREDICTED: homeobox protein Nkx-2.4 isoform X1 [Mus musculus]
NM_028195.3	novel_mir56,novel_mir3325,novel_mir3480,novel_mir5313,mmu-miR-31-5p,novel_mir527,novel_mir1037,novel_mir4516,mmu-miR-24-3p,mmu-miR-7058-5p,novel_mir2994,novel_mir2573,novel_mir4520,novel_mir3191,mmu-miR-7682-3p,novel_mir5653,novel_mir1187,novel_mir387,novel_mir142,novel_mir5749,novel_mir3261,novel_mir5461,novel_mir2461,mmu-miR-298-5p,novel_mir644,novel_mir1488,novel_mir588,novel_mir551,novel_mir2…	6mer	NA	-20.35	149	Cyth4	GO:0005886,GO:0008289,GO:0005086,GO:0032012,	K18441|1|5.4e-218|761.9|hsa:27128|cytohesin	gi|29293805|ref|NP_082471.2|	0	cytohesin-4 [Mus musculus]
NM_030064.4	novel_mir969,novel_mir1053,novel_mir3667,novel_mir826,novel_mir3240,novel_mir784,novel_mir4161,novel_mir140,novel_mir1343,novel_mir1107,novel_mir1915,novel_mir5284,novel_mir214,novel_mir3141,novel_mir2563,novel_mir1072,novel_mir3769,novel_mir4954,novel_mir561,novel_mir5247,novel_mir1519,mmu-miR-6961-5p,novel_mir926,novel_mir607,novel_mir2748,novel_mir4641,novel_mir65,novel_mir3546,novel_mir2826,n…	7mer-m8	NA	-58.89	322	Phf23	GO:0005737,GO:0005634,GO:0008270,GO:1902902,GO:0031398,GO:1901097,	K06158|1|6.7e-37|159.8|fch:102049818|ATP-binding cassette, subfamily F, member 3!K02374|2|1.9e-07|62.0|lak:106163413|tyrosine-protein phosphatase non-receptor type 13	gi|226423861|ref|NP_084340.2|	0	PHD finger protein 23 isoform a [Mus musculus]
NM_199195.1	novel_mir764,novel_mir1284,novel_mir5246,novel_mir1592,novel_mir3948,novel_mir3622,mmu-miR-6980-3p,novel_mir4769,novel_mir5325,novel_mir5217,novel_mir343,novel_mir2402,novel_mir662,novel_mir185,novel_mir1025,novel_mir4661,novel_mir2264,novel_mir203,novel_mir413,novel_mir5923,novel_mir1682,novel_mir3680,novel_mir3876,novel_mir3851,novel_mir1170,novel_mir1863,novel_mir4208,novel_mir372,novel_mir421…	7mer-m8	NA	-27.74	153	Bckdhb	GO:0005743,GO:0005947,GO:0003826,GO:0003863,GO:0032403,GO:0051384,GO:0055114,GO:0007584,GO:0009083,GO:0009063,GO:0051591,	K00167|1|2.8e-191|672.2|rno:29711|2-oxoisovalerate dehydrogenase E1 component beta subunit [EC:1.2.4.4]	gi|158749538|ref|NP_062140.1|	0	2-oxoisovalerate dehydrogenase subunit beta, mitochondrial precursor [Rattus norvegicus]
NM_021280.3	novel_mir1403,novel_mir387,novel_mir1187,novel_mir438,novel_mir2994,novel_mir944,novel_mir5082,novel_mir4516,novel_mir1184,novel_mir1338,novel_mir657,novel_mir5441,novel_mir1690,novel_mir3923,novel_mir390,novel_mir1169,novel_mir2541,novel_mir5666,novel_mir5325,novel_mir5344,novel_mir1292,mmu-miR-298-5p,novel_mir2366,novel_mir5456,mmu-miR-6943-3p,novel_mir146,novel_mir1108,novel_mir1175,novel_mir5…	7mer-1a	NA	-22.75	150	Plcg1	GO:0043005,GO:0030027,GO:0005829,GO:0005886,GO:0008180,GO:0005911,GO:0001726,GO:0004871,GO:0004435,GO:0030971,GO:0005158,GO:0005168,GO:0035254,GO:0051219,GO:0005509,GO:0009629,GO:1901339,GO:0001701,GO:0042542,GO:0071364,GO:0045766,GO:0038096,GO:0007202,GO:0032959,GO:0007173,GO:0043536,GO:0051281,GO:0009395,GO:0050852,GO:0019722,GO:0043278,GO:0009306,	K01116|1|0.0e+00|2662.1|mmu:18803|phosphatidylinositol phospholipase C, gamma-1 [EC:3.1.4.11]	gi|41393059|ref|NP_067255.2|	0	1-phosphatidylinositol 4,5-bisphosphate phosphodiesterase gamma-1 [Mus musculus]
NM_013672.2	novel_mir1245,mmu-miR-146b-5p,mmu-miR-191-3p,novel_mir2411,novel_mir3360,novel_mir4515,novel_mir4965,novel_mir1270,novel_mir274,novel_mir777,novel_mir240,novel_mir429,novel_mir598,novel_mir2905,novel_mir2054,novel_mir4672,novel_mir5101,novel_mir1090,novel_mir4202,novel_mir4797,novel_mir1050,novel_mir2197,novel_mir585,novel_mir1596,novel_mir3976,novel_mir426,novel_mir798,novel_mir3312,novel_mir420…	7mer-1a	NA	-20.93	145	Sp1	GO:0005654,GO:0005737,GO:0032993,GO:0000790,GO:0042826,GO:0001103,GO:0008022,GO:0001077,GO:0000979,GO:0071837,GO:0000978,GO:0035326,GO:0046872,GO:0035035,GO:0042803,GO:0043425,GO:0001829,GO:0042789,GO:0043923,GO:0030324,GO:1904828,GO:0048511,GO:0032869,GO:0060136,GO:0048596,GO:0030219,GO:0001892,GO:0048706,GO:0001503,GO:0043353,GO:0060216,GO:0045944,GO:0001889,	K04684|1|0.0e+00|1541.9|mmu:20683|transcription factor Sp1	gi|119226255|ref|NP_038700.2|	0	transcription factor Sp1 [Mus musculus]
NM_011540.2	novel_mir3554,novel_mir310,novel_mir315,novel_mir3070,novel_mir5913,novel_mir303,novel_mir1077,novel_mir2275,novel_mir613,novel_mir3845,novel_mir297,novel_mir1056,novel_mir751,novel_mir4155,novel_mir2062,novel_mir1632,novel_mir3972,novel_mir4665,novel_mir875,novel_mir2941,novel_mir282,novel_mir873,novel_mir4186,novel_mir3497,novel_mir756,novel_mir1579,mmu-miR-15a-3p,novel_mir5437,novel_mir2470,no…	7mer-m8	NA	-26	155	Tcap	GO:0030018,GO:0036122,GO:0070080,GO:0030674,GO:0008307,GO:0031432,GO:0044325,GO:0051373,GO:0048739,GO:0030916,GO:0060048,GO:0048769,GO:0055003,GO:0001756,GO:0003009,GO:0045214,GO:0030240,GO:0055008,GO:0035995,GO:0014898,GO:0030241,GO:0007512,	K19879|1|2.2e-91|339.7|mmu:21393|telethonin	gi|124248560|ref|NP_035670.2|	7.96114e-118	telethonin [Mus musculus]
NM_011718.2	novel_mir1206,novel_mir5540,mmu-miR-128-3p,novel_mir1873,novel_mir1276,novel_mir116,novel_mir4777,novel_mir5856,novel_mir2012,novel_mir2712,novel_mir2426,novel_mir802,novel_mir749,novel_mir5685,novel_mir1446,novel_mir6060,novel_mir906,novel_mir1814,novel_mir835,novel_mir1327,novel_mir4050,novel_mir199,novel_mir602,novel_mir3999,novel_mir174,novel_mir2806,novel_mir127,novel_mir254,novel_mir438,nov…	7mer-m8	NA	-22.85	154	Wnt10b	GO:0005615,GO:0005578,GO:0005109,GO:0043065,GO:0030501,GO:0007224,GO:0051885,GO:0045899,GO:0010971,GO:0030858,GO:0008284,GO:0090263,GO:0050680,GO:0045669,GO:0071425,GO:0051091,GO:0050909,GO:0006629,GO:0061196,GO:0060346,GO:0014835,GO:0030182,GO:0048741,GO:0071320,GO:0007050,GO:0000122,GO:0071374,GO:0048641,GO:0045165,GO:0045599,GO:0050821,GO:0032434,	K01357|1|6.1e-236|821.2|mmu:22410|wingless-type MMTV integration site family, member 10	gi|6756003|ref|NP_035848.1|	0	protein Wnt-10b precursor [Mus musculus]
NM_009744.3	novel_mir1632,novel_mir1468,novel_mir4712,novel_mir279,novel_mir1038,novel_mir1793,novel_mir282,novel_mir1769,novel_mir1322,novel_mir431,novel_mir2448,novel_mir3914,novel_mir2648,mmu-miR-129-5p,novel_mir1924,novel_mir4481,novel_mir2202,novel_mir4780,novel_mir1478,novel_mir2331,novel_mir1752,novel_mir1720,novel_mir4008,novel_mir2550,novel_mir667,novel_mir4399,mmu-miR-7240-5p,novel_mir5317,novel_mi…	7mer-m8	NA	-20.7	147	Bcl6	GO:0005657,GO:0005634,GO:0046872,GO:0001161,GO:0001227,GO:0005515,GO:0000977,GO:0031490,GO:0043065,GO:0031065,GO:0051272,GO:0002467,GO:0000902,GO:0006974,GO:0007283,GO:0043380,GO:0048294,GO:0030890,GO:0000060,GO:0048821,GO:0050727,GO:0045666,GO:0000122,GO:0030183,GO:0008285,GO:2000773,GO:0043087,GO:0030036,GO:0001953,GO:0043066,GO:0030308,GO:0035024,GO:0032764,GO:0045746,GO:0045629,	K15618|1|0.0e+00|1401.0|sbq:101034308|B-cell lymphoma 6 protein!K09228|5|3.7e-48|198.0|amex:111188257|KRAB domain-containing zinc finger protein	gi|6753172|ref|NP_033874.1|	0	B-cell lymphoma 6 protein homolog [Mus musculus]
NM_013593.3	novel_mir6133,novel_mir2831,novel_mir4783,novel_mir5796,novel_mir5811,mmu-miR-365-2-5p,novel_mir454,novel_mir647,mmu-miR-3473b,novel_mir2118,novel_mir2409,novel_mir4298,novel_mir98,novel_mir787,novel_mir5771,novel_mir2965,novel_mir4194,novel_mir1206,novel_mir5521,novel_mir5703,novel_mir2892,novel_mir2117,novel_mir271,novel_mir2922,novel_mir669,novel_mir2916,novel_mir1005,novel_mir491,novel_mir444…	6mer	NA	-24.59	144	Mb	GO:0070062,GO:0046872,GO:0005344,GO:0019825,GO:0020037,GO:0001666,GO:0050873,GO:0043353,GO:0007507,GO:0009725,GO:0015671,GO:0031444,GO:0042542,	K21892|1|7.3e-83|311.6|mmu:17189|myoglobin	gi|21359820|ref|NP_038621.2|	2.74882e-108	myoglobin [Mus musculus]
NM_001081025.1	novel_mir1042,novel_mir1201,novel_mir987,novel_mir210,novel_mir1259,novel_mir1044,novel_mir4736,novel_mir4386	6mer	NA	-20.11	153	Maats1	-	K08745|1|7.1e-13|80.5|cmy:102944091|solute carrier family 27 (fatty acid transporter), member 1/4 [EC:6.2.1.-]!K16464|2|1.6e-09|69.3|amex:103036019|centrosomal protein CEP250!K16462|3|4.8e-09|67.8|lak:106174506|centrosomal protein CEP164!K20045|4|3.1e-08|65.1|ncc:104966737|intersectin!K12484|5|4.0e-08|64.7|kmr:108232630|Rab11 family-interacting protein 1/2/5	gi|124486624|ref|NP_001074494.1|	0	protein MAATS1 [Mus musculus]
NM_025505.4	novel_mir4970,novel_mir2253,novel_mir236,novel_mir749,novel_mir647,novel_mir5480,novel_mir233,novel_mir4763,novel_mir179,novel_mir6133,novel_mir2922,novel_mir4670,novel_mir669,novel_mir1752,novel_mir4921,novel_mir6026,novel_mir6135,novel_mir2892,novel_mir271,novel_mir6130,novel_mir2561,novel_mir1760,novel_mir684,novel_mir6160,novel_mir5599,novel_mir2648,novel_mir700,novel_mir1206,novel_mir2429,no…	8mer-1a	NA	-22.14	153	Blzf1	GO:0000139,GO:0005654,GO:0031625,GO:0007030,GO:0043001,GO:0016192,	-	gi|237649005|ref|NP_001153680.1|	0	golgin-45 isoform b [Mus musculus]
NM_027184.1	novel_mir1701,novel_mir2883,novel_mir983,novel_mir3999,novel_mir174,novel_mir4662,novel_mir2132,novel_mir2994,novel_mir4648,novel_mir66,mmu-miR-7058-5p,novel_mir4745,novel_mir3680,novel_mir5562,novel_mir3007,novel_mir5045,novel_mir657,mmu-miR-383-5p,novel_mir3498,novel_mir3515,novel_mir2010,novel_mir2541,novel_mir280,novel_mir2366,novel_mir146,novel_mir142,novel_mir3642,novel_mir5805,novel_mir590…	7mer-m8	NA	-53.58	322	Ipmk	-	K00915|1|2.3e-233|813.9|mmu:69718|inositol-polyphosphate multikinase [EC:2.7.1.140 2.7.1.151]	gi|755535046|ref|XP_011241857.1|	0	PREDICTED: inositol polyphosphate multikinase isoform X2 [Mus musculus]
NM_001270609.1	novel_mir4045,novel_mir603,novel_mir1556,novel_mir333,novel_mir1793,novel_mir1013,novel_mir873,novel_mir1322,novel_mir2530,novel_mir1312,novel_mir5352,mmu-miR-214-3p,novel_mir5699,novel_mir902,novel_mir2517,novel_mir109,novel_mir468,novel_mir2765,novel_mir3766,novel_mir973,novel_mir1637,novel_mir3554,novel_mir3,novel_mir4399,novel_mir5263,novel_mir2481,novel_mir1744,novel_mir1870,novel_mir1119,no…	6mer	NA	-73.84	320	Ascl5	-	K09067|1|6.6e-107|390.6|mmu:226439|achaete-scute complex protein	gi|396578161|ref|NP_001257538.1|	2.2847e-133	achaete-scute homolog 5 [Mus musculus]
NM_153099.1	novel_mir927,novel_mir3084,novel_mir756,novel_mir5232,novel_mir1376,novel_mir2396,novel_mir541,novel_mir5251,novel_mir1694,novel_mir4352,novel_mir4188,novel_mir59,novel_mir6148,novel_mir1313,novel_mir2109,novel_mir2699,novel_mir1482,novel_mir6011,novel_mir1276,novel_mir2062,novel_mir2804,novel_mir583,novel_mir3579,novel_mir4023,mmu-miR-6933-5p,novel_mir2262,novel_mir1133,novel_mir1769,novel_mir45…	8mer-1a	NA	-24.02	157	Prss42	GO:0005737,GO:0046658,GO:0005576,GO:0004252,GO:0007283,GO:0007281,GO:0006508,	K09640|1|1.5e-68|264.6|ocu:103349216|transmembrane protease serine 9 [EC:3.4.21.-]!K09629|5|1.5e-52|211.5|mmu:353130|serine protease 33 [EC:3.4.21.-]	gi|23346527|ref|NP_694739.1|	0	serine protease 42 precursor [Mus musculus]
NM_008373.1	novel_mir3771,novel_mir4192,mmu-miR-194-5p,novel_mir2887,novel_mir2530,novel_mir3952,novel_mir134,mmu-miR-212-3p	7mer-1a	NA	-21.35	149	Il9	GO:0005615,GO:0005125,GO:0005140,GO:0008083,GO:0045407,GO:0006955,GO:0030307,	K05432|1|3.2e-79|298.5|mmu:16198|interleukin 9	gi|6680437|ref|NP_032399.1|	6.35998e-102	interleukin-9 precursor [Mus musculus]
NM_019793.3	novel_mir1814,novel_mir2448,novel_mir2194,novel_mir1544,novel_mir1040,novel_mir3858,novel_mir4069,novel_mir4023,novel_mir2522,novel_mir5314,novel_mir2583,novel_mir4741,novel_mir3077,novel_mir1681,novel_mir1276,novel_mir884,novel_mir842,novel_mir2699,novel_mir3280,novel_mir2868,novel_mir2355,novel_mir2639,novel_mir4285,novel_mir4041,novel_mir3553,novel_mir224,novel_mir4333,novel_mir1977,novel_mir5…	6mer	NA	-25.53	159	Tspan3	GO:0005887,GO:0070062,GO:0007166,	K17293|1|8.4e-145|518.1|mmu:56434|tetraspanin-3	gi|254281189|ref|NP_062767.3|	0	tetraspanin-3 [Mus musculus]
NM_025911.2	novel_mir3977,novel_mir2942,novel_mir2282,novel_mir2062,novel_mir4741,novel_mir6001,mmu-miR-211-5p,novel_mir374,novel_mir5719,novel_mir3497,novel_mir2851,novel_mir4770,novel_mir3505,novel_mir1585,novel_mir1611,novel_mir4163,novel_mir955,novel_mir4680,novel_mir392,novel_mir1164,novel_mir99,novel_mir2283,novel_mir4689,novel_mir729,novel_mir1694,novel_mir5163,novel_mir5437,novel_mir1371,novel_mir142…	7mer-m8	NA	-20.55	140	Ccdc91	GO:0005654,GO:0005794,GO:0016020,GO:0042802,GO:0015031,	K13356|1|3.1e-28|131.3|bfo:BRAFLDRAFT_90375|alcohol-forming fatty acyl-CoA reductase [EC:1.2.1.84]!K18626|4|2.3e-15|88.6|pvt:110090020|trichohyalin	gi|27532950|ref|NP_080187.2|	0	coiled-coil domain-containing protein 91 [Mus musculus]
NM_019517.4	novel_mir1373,novel_mir5856,novel_mir5544,novel_mir2426,novel_mir802,novel_mir4192,novel_mir3277,novel_mir906,novel_mir1814,novel_mir2330,novel_mir2616,novel_mir2336,novel_mir2020,novel_mir2379,novel_mir142,novel_mir4371,novel_mir496,novel_mir4748,novel_mir1488,novel_mir931,novel_mir6142,novel_mir5739,mmu-miR-31-5p,novel_mir1184,novel_mir500,novel_mir1037,novel_mir2178,novel_mir1403,novel_mir2806…	8mer-1a	NA	-20.61	140	Bace2	GO:0016021,GO:0009986,GO:0005768,GO:0005783,GO:0005794,GO:0001540,GO:0004190,GO:0006509,GO:0050435,GO:0030163,GO:0042985,	K07747|1|2.2e-299|1032.7|mmu:56175|beta-site APP-cleaving enzyme 2 (memapsin 1) [EC:3.4.23.45]	gi|244798416|ref|NP_062390.3|	0	beta-secretase 2 precursor [Mus musculus]
NM_007837.4	novel_mir5504,novel_mir5888,novel_mir1615,novel_mir5454,novel_mir2535,novel_mir2386,novel_mir2874,novel_mir2575,novel_mir302,novel_mir3646,novel_mir4244,novel_mir3672,novel_mir1572,novel_mir806,novel_mir4989,novel_mir573,novel_mir2090,novel_mir4027,novel_mir3070,novel_mir6150,novel_mir4202,novel_mir5456,novel_mir696,novel_mir1286,novel_mir129,mmu-miR-615-3p,novel_mir297,novel_mir5090,novel_mir463…	6mer	NA	-23.34	156	Ddit3	GO:1990622,GO:0036488,GO:0035976,GO:1990617,GO:0032993,GO:0005770,GO:0043522,GO:0008140,GO:0000978,GO:0003714,GO:0001077,GO:0046982,GO:0043161,GO:0043525,GO:0072655,GO:1990440,GO:1903026,GO:1990442,GO:0030968,GO:0006983,GO:0090090,GO:0042594,GO:0051898,GO:2000016,GO:0045662,GO:0007050,GO:0000122,GO:0032792,GO:0045599,GO:0044324,GO:0070059,GO:0032757,GO:0045454,GO:0051209,GO:0001955,GO:0042789,	K04452|1|2.5e-89|332.8|mmu:13198|DNA damage-inducible transcript 3	gi|148692548|gb|EDL24495.1|	2.83018e-121	DNA-damage inducible transcript 3, isoform CRA_b, partial [Mus musculus]
NM_009498.4	novel_mir487,novel_mir1314,novel_mir2032,mmu-miR-674-5p,novel_mir2372,novel_mir1218,novel_mir1166,novel_mir2275,novel_mir596,novel_mir4634,mmu-miR-1197-3p,novel_mir1772,novel_mir1077,mmu-miR-138-1-3p,novel_mir3377,novel_mir191,novel_mir801,novel_mir310,novel_mir435,novel_mir5523,novel_mir2150,mmu-let-7f-2-3p,mmu-miR-8114,novel_mir4303,novel_mir4996,novel_mir2639,novel_mir1365,novel_mir3521,novel_…	8mer-1a	NA	-24.31	145	Vamp3	GO:0043005,GO:0055037,GO:0030141,GO:0030665,GO:0005829,GO:0009986,GO:0016021,GO:0030054,GO:0031201,GO:0045202,GO:0016324,GO:0005484,GO:0017075,GO:0042147,GO:1903593,GO:0034446,GO:0001921,GO:0070254,GO:0017156,GO:0035493,GO:1903531,GO:0051024,GO:0043001,	K13505|1|1.5e-50|205.3|mmu:22319|vesicle-associated membrane protein 3	gi|6678553|ref|NP_033524.1|	9.42313e-69	vesicle-associated membrane protein 3 [Mus musculus]
NM_001033281.3	novel_mir1875,novel_mir1308,mmu-miR-302a-3p,novel_mir607,novel_mir622,novel_mir1975,novel_mir3485,novel_mir836,novel_mir259,mmu-miR-187-5p,novel_mir4489,novel_mir183,novel_mir2718,novel_mir506,novel_mir4289,novel_mir4338,novel_mir2276,mmu-miR-342-5p,novel_mir295,novel_mir32,novel_mir363,novel_mir5318,novel_mir3920,novel_mir1835,novel_mir2452,novel_mir3416,novel_mir221,novel_mir632,novel_mir1733,n…	6mer	NA	-37.47	172	Prdm6	GO:0005634,GO:0003676,GO:0046872,GO:0018024,GO:0042803,GO:0022008,GO:0032259,GO:0016569,GO:0045892,GO:0051151,	K20795|1|0.0e+00|1185.6|hsa:93166|histone-lysine N-methyltransferase PRDM6 [EC:2.1.1.43]	gi|755560796|ref|XP_011245207.1|	0	PREDICTED: putative histone-lysine N-methyltransferase PRDM6 isoform X2 [Mus musculus]
NM_029794.2	novel_mir490,novel_mir4393,novel_mir5193,novel_mir5088,novel_mir269,novel_mir680,novel_mir5498,novel_mir34,novel_mir3296,mmu-miR-351-5p,novel_mir6013,novel_mir4275,novel_mir1295,novel_mir544,novel_mir2560,novel_mir2439,novel_mir3479,mmu-miR-672-3p,mmu-miR-149-5p,novel_mir1230,novel_mir162,novel_mir638,novel_mir3974,novel_mir2544,novel_mir2728,novel_mir4849,novel_mir3811,novel_mir5984,novel_mir489…	7mer-m8	NA	-25.09	150	Cpsf4l	-	K14404|1|3.4e-71|273.1|ngi:103732798|cleavage and polyadenylation specificity factor subunit 4	gi|568974756|ref|XP_006533767.1|	5.39424e-138	PREDICTED: putative cleavage and polyadenylation specificity factor subunit 4-like protein isoform X10 [Mus musculus]
XM_006533292.3	novel_mir340,novel_mir1519,novel_mir5542,novel_mir4473,novel_mir5299,novel_mir3141,novel_mir5640,novel_mir5135,novel_mir506,novel_mir5458,novel_mir4995,novel_mir4228,novel_mir1303,novel_mir744,novel_mir3832,novel_mir4282,novel_mir4137,novel_mir4011,novel_mir2508,novel_mir1452,novel_mir1364,novel_mir686,novel_mir935,novel_mir5992,novel_mir3416,novel_mir2383,novel_mir3469,novel_mir603,novel_mir5861…	6mer	NA	-29.92	161	Tenm2	GO:0030054,GO:0043197,GO:0005887,GO:0045211,GO:0005794,GO:0005783,GO:0005634,GO:0005102,GO:0050839,GO:0046982,GO:0042803,GO:0007157,GO:0006355,GO:0097264,GO:0007165,	K06252|1|2.7e-65|256.5|lcm:102345859|tenascin	gi|154090989|ref|NP_035986.3|	0	teneurin-2 isoform 1 [Mus musculus]
NM_019779.3	novel_mir4202,novel_mir1998,novel_mir2759,novel_mir1003,novel_mir1463,novel_mir879,novel_mir2337,novel_mir129,novel_mir1644,novel_mir3069,novel_mir4077,novel_mir4111,novel_mir2773,novel_mir1553,novel_mir101,novel_mir680,novel_mir5553,novel_mir1503,novel_mir5193,novel_mir1637,novel_mir1385,novel_mir144,mmu-miR-3095-3p,novel_mir971,novel_mir4477,novel_mir4287,novel_mir5673,novel_mir4095,novel_mir12…	7mer-m8	NA	-22.7	162	Cyp11a1	GO:0030061,GO:0043204,GO:0015485,GO:0008386,GO:0020037,GO:0005506,GO:0016709,GO:0043200,GO:0060135,GO:0051412,GO:0018894,GO:0060992,GO:0010332,GO:0006700,GO:0071347,GO:0042542,GO:0071372,GO:0006704,GO:0033197,GO:0071356,GO:0043627,GO:0021766,GO:0009651,GO:0008203,GO:0071276,GO:0061370,GO:0017085,GO:0060014,GO:0034650,GO:0018879,GO:0071560,GO:0071236,GO:0014037,GO:0033595,GO:0021549,GO:0043279,GO:…	K00498|1|2.9e-254|881.7|ngi:103736867|cholesterol monooxygenase (side-chain-cleaving) [EC:1.14.15.6]	gi|148747566|ref|NP_062753.3|	0	cholesterol side-chain cleavage enzyme, mitochondrial precursor [Mus musculus]
NM_027014.1	novel_mir1343,novel_mir4351,novel_mir134,novel_mir242,novel_mir400,novel_mir1822,mmu-miR-205-5p,novel_mir1381,novel_mir1213,novel_mir895,novel_mir3483,novel_mir4012,novel_mir2733,novel_mir6034,novel_mir41,novel_mir1855,novel_mir3771,novel_mir1087,novel_mir2444,novel_mir2107,novel_mir109,novel_mir971,novel_mir1507,novel_mir3714,novel_mir4641,novel_mir973,novel_mir6027,novel_mir2530,novel_mir4718,n…	7mer-m8	NA	-25.4	153	Gins1	GO:0000811,GO:0005737,GO:0043138,GO:0005515,GO:0001833,GO:1902983,	K10732|1|1.5e-110|403.7|mmu:69270|GINS complex subunit 1	gi|568918310|ref|XP_006500196.1|	3.47018e-112	PREDICTED: DNA replication complex GINS protein PSF1 isoform X1 [Mus musculus]
NM_015781.4	novel_mir4322,novel_mir2236,novel_mir879,novel_mir2147,novel_mir1188,novel_mir4834,novel_mir340,novel_mir719,novel_mir3667,novel_mir5253,novel_mir3911,novel_mir6059,novel_mir4846,novel_mir45,novel_mir1634,novel_mir123,novel_mir316,novel_mir1021,novel_mir5296,novel_mir1834,novel_mir1972,novel_mir1927,novel_mir4413,novel_mir4962,novel_mir1861,mmu-miR-10a-5p,novel_mir3983,novel_mir1799,novel_mir4203…	6mer	NA	-21.95	160	Nap1l1	-	K11279|1|1.0e-231|806.6|csab:103238756|nucleosome assembly protein 1-like 1	gi|226443026|ref|NP_001140179.1|	0	nucleosome assembly protein 1-like 1 isoform 1 precursor [Mus musculus]
NM_172783.3	novel_mir5625,novel_mir2654,novel_mir4499,novel_mir261,novel_mir4845,mmu-miR-215-3p,novel_mir371,novel_mir2765,novel_mir1766,novel_mir559,novel_mir5426,novel_mir2530,novel_mir1054,novel_mir252,novel_mir2371,novel_mir994,novel_mir1531,novel_mir4472,novel_mir3707,novel_mir1556,novel_mir3172,novel_mir863,novel_mir4369,novel_mir469,novel_mir2932,novel_mir273,novel_mir1107,novel_mir1343,novel_mir3897,…	6mer	NA	-23.56	148	Phka2	GO:0005964,GO:0005886,GO:0005516,GO:0004689,GO:0005977,	K07190|1|0.0e+00|2387.5|cge:100754496|phosphorylase kinase alpha/beta subunit	gi|29477071|gb|AAH50040.1|	0	Phka2 protein [Mus musculus]
NM_033217.3	mmu-miR-195a-5p,novel_mir6027,novel_mir5477,novel_mir1765,novel_mir3719,novel_mir3566,mmu-miR-299a-3p,novel_mir2192,novel_mir1512,mmu-miR-221-5p,novel_mir3902,novel_mir791,novel_mir1249,novel_mir5104,novel_mir4288,novel_mir3802,novel_mir3862,mmu-miR-802-3p,novel_mir2912,mmu-miR-342-5p,novel_mir1364,novel_mir4139,novel_mir184,novel_mir2332,novel_mir2718,novel_mir5135,novel_mir5957,mmu-miR-700-5p,n…	7mer-m8	NA	-50.5	302	Ngfr	GO:0045334,GO:0005791,GO:0005887,GO:0014069,GO:0032809,GO:0045121,GO:0043204,GO:0005911,GO:0005794,GO:0005739,GO:0009897,GO:0005635,GO:0032590,GO:0042803,GO:0070678,GO:0031625,GO:0005031,GO:0001540,GO:0048406,GO:0017137,GO:0005168,GO:0006954,GO:0043524,GO:0048146,GO:0016525,GO:0031069,GO:0016048,GO:0042488,GO:0032224,GO:0006955,GO:0007411,GO:0035914,GO:0032922,GO:0019233,GO:2001235,GO:0051799,GO:…	K02583|1|1.3e-255|887.1|mmu:18053|tumor necrosis factor receptor superfamily member 16	gi|70794803|ref|NP_150086.2|	0	tumor necrosis factor receptor superfamily member 16 precursor [Mus musculus]
NM_015731.3	novel_mir698,novel_mir4974,novel_mir3557,novel_mir6001,novel_mir4741,novel_mir5358,novel_mir2596,novel_mir656,novel_mir1133,novel_mir1769,novel_mir2906,novel_mir4526,novel_mir389,mmu-miR-337-3p,novel_mir3323,novel_mir519,novel_mir1858,novel_mir2644,novel_mir3411,novel_mir1894,novel_mir3898,novel_mir310,mmu-miR-17-5p,novel_mir1864,novel_mir5998,novel_mir4485,novel_mir997,novel_mir5275,novel_mir310…	8mer-1a	NA	-56.34	323	Atp9a	GO:0016021,GO:0005769,GO:0055037,GO:0005802,GO:0048471,GO:0005886,GO:0005524,GO:0000287,GO:0004012,GO:0006890,GO:0015914,GO:0006897,	K01530|1|0.0e+00|2045.4|ngi:103735761|phospholipid-translocating ATPase [EC:7.6.2.1]	gi|575403038|ref|NP_001276374.1|	0	probable phospholipid-transporting ATPase IIA isoform 2 [Mus musculus]
NM_026828.3	novel_mir2366,novel_mir551,novel_mir4570,novel_mir3536,mmu-miR-5620-5p,novel_mir2704,novel_mir422,novel_mir2726,novel_mir4823,novel_mir5461,novel_mir4520,novel_mir1281,novel_mir5653,novel_mir1187,novel_mir4910,novel_mir202,novel_mir3507,novel_mir3054,novel_mir1082,novel_mir1013,novel_mir454,novel_mir3150,novel_mir1208,novel_mir2753,novel_mir233,novel_mir4777,novel_mir1276,novel_mir3718,novel_mir1…	7mer-1a	NA	-49.1	316	Dnlz	GO:0005739,GO:0051087,GO:0008270,GO:0006457,GO:0030150,GO:0050821,	K17808|1|5.3e-99|366.7|mmu:52838|mitochondrial protein import protein ZIM17	gi|218777849|ref|NP_001132975.1|	3.13153e-51	DNL-type zinc finger protein isoform 2 [Mus musculus]
NM_021411.4	novel_mir521,novel_mir2079,novel_mir1294,novel_mir790,novel_mir6130,novel_mir2511,novel_mir3251,novel_mir1065,novel_mir2916,novel_mir5681,novel_mir1856,novel_mir3050,novel_mir4382,novel_mir1516,novel_mir1076,novel_mir3908,novel_mir2194,novel_mir2306,novel_mir4126,novel_mir1291,novel_mir1863,novel_mir3950,novel_mir1025,novel_mir3253,novel_mir3768,novel_mir5916,novel_mir348,novel_mir1113,novel_mir5…	7mer-1a	NA	-81.68	473	Rab37	GO:0005793,GO:0030141,GO:0005525,GO:0005515,GO:0003924,GO:0007264,GO:0015031,	K07914|1|3.0e-123|446.8|mmu:58222|Ras-related protein Rab-37	gi|254939625|ref|NP_067386.3|	1.7899e-166	ras-related protein Rab-37 isoform 1 [Mus musculus]
NM_011347.2	novel_mir398,novel_mir4177,novel_mir3077,novel_mir4466,novel_mir2665,novel_mir4699,novel_mir2583,mmu-miR-25-5p,novel_mir2297,novel_mir802,mmu-miR-324-5p,novel_mir906,novel_mir2194,novel_mir3494,novel_mir4192,novel_mir1446,novel_mir1516,novel_mir307,novel_mir4483,novel_mir1814,novel_mir2359,novel_mir3952,novel_mir1661,mmu-miR-21a-3p,novel_mir1574,novel_mir1276,novel_mir4143,novel_mir1595,novel_mir…	8mer-1a	NA	-20.38	147	Selp	GO:0005654,GO:0005615,GO:0009897,GO:0016021,GO:0070062,GO:0031092,GO:0042806,GO:0048306,GO:0005509,GO:0033691,GO:0001530,GO:0008201,GO:0070492,GO:0008430,GO:0050901,GO:0002691,GO:0033623,GO:0032496,GO:0007626,GO:0071354,GO:0010572,GO:0040007,GO:0014068,GO:0009791,GO:0035584,GO:0019953,GO:0002687,GO:0007420,GO:0007157,GO:0014070,GO:0001887,GO:0045785,GO:0006954,	K06496|1|0.0e+00|1675.6|mmu:20344|selectin, platele	gi|6755456|ref|NP_035477.1|	0	P-selectin precursor [Mus musculus]
NM_029759.4	novel_mir4900,novel_mir1975,novel_mir742,novel_mir133,mmu-miR-378a-3p,novel_mir3771,novel_mir1004,novel_mir1689,novel_mir905,novel_mir2112,novel_mir788,novel_mir4525,novel_mir1974,novel_mir689,novel_mir863,novel_mir686,novel_mir5183,novel_mir1197,novel_mir3591,novel_mir5724,novel_mir4619,novel_mir1053,novel_mir140,novel_mir183,novel_mir3264,novel_mir4259,novel_mir5319,novel_mir4179,novel_mir2001,…	7mer-m8	NA	-45.82	296	Mtfr1l	GO:0005739,GO:0000266,GO:0009060,	-	gi|148698058|gb|EDL30005.1|	0	RIKEN cDNA 2410166I05, isoform CRA_b, partial [Mus musculus]
NM_029690.2	novel_mir4331,novel_mir1968,novel_mir3976,novel_mir4854,novel_mir2801,novel_mir1119,novel_mir4056,novel_mir5674,novel_mir4961,novel_mir1975,novel_mir3562,novel_mir1169,novel_mir180,mmu-miR-328-3p,mmu-miR-674-3p,novel_mir102,novel_mir1770,novel_mir4228,novel_mir127,novel_mir4461,novel_mir4125,novel_mir1187,novel_mir4462,novel_mir334,novel_mir3416,novel_mir94,novel_mir5062,novel_mir4508,novel_mir55…	6mer	NA	-24.23	153	Actrt3	GO:0001673,GO:0005856,GO:0005737,GO:0005515,	K10354|1|1.2e-125|454.5|amj:102562188|actin, alpha skeletal muscle!K05692|4|1.7e-119|434.1|gja:107110796|actin beta/gamma 1!K12314|5|3.9e-119|433.0|pvt:110085534|actin, alpha cardiac muscle	gi|58037457|ref|NP_083966.1|	0	actin-related protein T3 [Mus musculus]
NM_007891.5	novel_mir4300,novel_mir801,novel_mir1889,novel_mir2834,novel_mir475,novel_mir679,novel_mir1233,novel_mir487,mmu-miR-874-3p,novel_mir1145,novel_mir3385,novel_mir3845,mmu-miR-709,novel_mir87,novel_mir2477,novel_mir1218,mmu-miR-3470b,mmu-miR-485-5p,novel_mir685,novel_mir2275,novel_mir1038,novel_mir1060,novel_mir3497,novel_mir673,novel_mir6106,novel_mir1468,novel_mir2813,novel_mir2941,novel_mir2191,n…	7mer-m8	NA	-20.43	146	E2f1	GO:0035189,GO:0005737,GO:0000790,GO:0019901,GO:0001047,GO:0005509,GO:0046983,GO:0043565,GO:0008134,GO:0003700,GO:0000122,GO:2000045,GO:1990086,GO:0072332,GO:0008630,GO:0007283,GO:0043276,GO:0071930,GO:0030900,GO:0043392,GO:0048255,GO:0071466,GO:0071456,GO:0000077,GO:0071398,GO:0045944,GO:0048146,GO:0070345,GO:0045599,GO:1990090,	K17454|1|4.1e-247|858.6|mmu:13555|transcription factor E2F1	gi|6681243|ref|NP_031917.1|	0	transcription factor E2F1 isoform a [Mus musculus]
NM_025666.2	novel_mir101,novel_mir4356,novel_mir5008,novel_mir3296,novel_mir5078,novel_mir6013,novel_mir1017,novel_mir1295,novel_mir83,mmu-miR-17-3p,novel_mir4733,novel_mir23,novel_mir3180,novel_mir5294,novel_mir4749,mmu-miR-204-3p,novel_mir896,mmu-miR-1895,novel_mir4752,novel_mir3936,novel_mir3243,novel_mir1003,novel_mir4918,novel_mir879,novel_mir4024,novel_mir3226,novel_mir2232,novel_mir1317,novel_mir789,n…	7mer-m8	NA	-24.91	148	Ubr7	-	K11979|1|1.4e-257|893.6|mmu:66622|E3 ubiquitin-protein ligase UBR7 [EC:2.3.2.27]	gi|148686905|gb|EDL18852.1|	0	RIKEN cDNA 5730410I19 [Mus musculus]
NM_172449.2	novel_mir3155,novel_mir1349,novel_mir1720,novel_mir5536,novel_mir5920,novel_mir1157,novel_mir2969,novel_mir679,novel_mir3562,novel_mir554,novel_mir4840,novel_mir465,novel_mir4300,novel_mir2222,novel_mir368,novel_mir4950,mmu-miR-339-5p,novel_mir1218,mmu-miR-296-3p,novel_mir5939,novel_mir308,novel_mir4211,novel_mir361,novel_mir3412,novel_mir487,novel_mir1468,novel_mir3579,novel_mir1813,novel_mir673…	6mer	NA	-116.6	621	Bzrap1	-	K19922|1|0.0e+00|3513.4|rno:287609|peripheral-type benzodiazepine receptor-associated protein 1	gi|157909774|ref|NP_766037.2|	0	peripheral-type benzodiazepine receptor-associated protein 1 [Mus musculus]
NM_178626.3	mmu-miR-5114,novel_mir4079,novel_mir2402,novel_mir3472,novel_mir580,novel_mir997,mmu-miR-140-3p,novel_mir347,novel_mir3159,novel_mir230,mmu-miR-486a-3p,novel_mir1154,novel_mir310,novel_mir2128,novel_mir3634,novel_mir808,novel_mir892,novel_mir5473,novel_mir4794,novel_mir2156,novel_mir5816,novel_mir3234,mmu-miR-134-5p,novel_mir5229,novel_mir1077,novel_mir912,novel_mir4776,novel_mir1772,novel_mir503…	7mer-1a	NA	-25.94	156	Cdc42se2	GO:0005737,GO:0005856,GO:0001891,GO:0070062,GO:0042995,GO:0005515,GO:0005198,GO:0008360,GO:0006909,GO:0009966,	-	gi|9910378|ref|NP_064625.1|	7.3521e-58	CDC42 small effector protein 2 [Homo sapiens]
NM_172613.4	novel_mir533,novel_mir4437,novel_mir1981,novel_mir3657,novel_mir52,novel_mir5291,novel_mir103,novel_mir1861,novel_mir319,novel_mir3416,novel_mir935,novel_mir5062,mmu-miR-150-5p,novel_mir4312,novel_mir4729,novel_mir5352,novel_mir3661,novel_mir5888,novel_mir1021,novel_mir1762,novel_mir5650,novel_mir4859,novel_mir300,novel_mir1116,novel_mir2348,novel_mir2670,novel_mir4539,novel_mir4026,novel_mir3591…	7mer-m8	NA	-20.84	152	Atp13a4	GO:0005887,GO:0005789,GO:0005388,GO:0103116,GO:0046872,GO:0005524,GO:0006874,GO:0006812,	K14951|1|0.0e+00|2234.9|rno:288026|cation-transporting P-type ATPase 13A3/4/5 [EC:3.6.3.-]	gi|261599069|ref|NP_766201.3|	0	probable cation-transporting ATPase 13A4 isoform 2 [Mus musculus]
NM_018854.4	novel_mir2287,novel_mir467,novel_mir953,novel_mir95,mmu-miR-671-5p,novel_mir2460,novel_mir3188,novel_mir894,novel_mir2562,novel_mir3954,novel_mir554,novel_mir2720,novel_mir4706,novel_mir233,novel_mir1698,novel_mir2644,novel_mir2840,novel_mir818,novel_mir3419,novel_mir3280,novel_mir1240,novel_mir700,novel_mir3785,novel_mir5537,novel_mir1878	6mer	NA	-20.61	157	Ift20	GO:0097542,GO:0001750,GO:0000139,GO:0005814,GO:0097546,GO:0005902,GO:0030992,GO:0044292,GO:1902636,GO:0005801,GO:0031514,GO:0032391,GO:0032420,GO:0070062,GO:0002046,GO:0061351,GO:0060828,GO:0034067,GO:0055007,GO:0008542,GO:0035845,GO:0001822,GO:0042073,GO:0001736,GO:0061512,GO:0060122,GO:0007224,GO:0051642,GO:2000785,GO:0036372,GO:1902017,GO:0090102,	K16473|1|2.0e-69|266.5|cge:100759277|intraflagellar transport protein 20	gi|9506865|ref|NP_061342.1|	2.76034e-88	intraflagellar transport protein 20 homolog [Mus musculus]
XM_006540905.3	novel_mir2671,novel_mir5795,novel_mir77,mmu-miR-702-3p,novel_mir1582,novel_mir1429,novel_mir264,novel_mir5972,novel_mir305,novel_mir2894,novel_mir1050,novel_mir1780,novel_mir415,novel_mir1537,novel_mir2143,mmu-miR-7043-3p,novel_mir5590,novel_mir6157,novel_mir4056,novel_mir2905,novel_mir4077,novel_mir359,novel_mir5382,novel_mir1878,novel_mir633,novel_mir4058,novel_mir1264,novel_mir2840,novel_mir51…	7mer-m8	NA	-20.56	147	Hps5	GO:0031084,GO:0005515,GO:0007596,GO:0043473,GO:0006996,	K20191|1|0.0e+00|2254.6|mmu:246694|Hermansky-Pudlak syndrome 5 protein	gi|568947914|ref|XP_006540969.1|	0	PREDICTED: Hermansky-Pudlak syndrome 5 protein homolog isoform X3 [Mus musculus]
NM_011612.2	novel_mir4292,mmu-miR-101a-5p,novel_mir3188,novel_mir5410,novel_mir1626,novel_mir3139,novel_mir1188,novel_mir999,novel_mir5778,novel_mir2493,novel_mir1487,novel_mir3179,novel_mir5318,novel_mir1141,novel_mir2670,novel_mir2677,novel_mir3897,novel_mir2309,novel_mir2951,novel_mir1099,novel_mir5888,novel_mir782,novel_mir3416,novel_mir4361,novel_mir1263,mmu-miR-7658-3p,novel_mir2179,novel_mir1565,novel…	6mer	NA	-20.85	153	Tnfrsf9	GO:0005887,GO:0005615,GO:0009897,GO:0019955,GO:0005031,GO:0032496,GO:0007275,GO:0042981,GO:2001180,GO:0006955,GO:2001183,GO:0008285,GO:0033209,GO:0006954,GO:0008625,GO:0070207,	K05146|1|9.9e-156|554.7|mmu:21942|tumor necrosis factor receptor superfamily member 9	gi|6755831|ref|NP_035742.1|	0	tumor necrosis factor receptor superfamily member 9 isoform 1 precursor [Mus musculus]
NM_134050.4	novel_mir4959,novel_mir4641,novel_mir5076,novel_mir3079,novel_mir4597,novel_mir1152,novel_mir773,novel_mir573,novel_mir2530,novel_mir370,novel_mir5071,novel_mir4607,novel_mir275,novel_mir3707,novel_mir2164,novel_mir1556,mmu-miR-505-5p,novel_mir5183,novel_mir2104,mmu-miR-652-5p,novel_mir5049,novel_mir3897,mmu-miR-328-5p,novel_mir140,novel_mir1343,novel_mir4900,novel_mir893,novel_mir532,novel_mir24…	6mer	NA	-21.23	156	Rab15	GO:0005886,GO:0005525,GO:0005515,GO:0007264,GO:0015031,	K07908|1|4.7e-122|443.4|ptr:467484|Ras-related protein Rab-15	gi|545507673|ref|XP_005623565.1|	2.55569e-121	PREDICTED: ras-related protein Rab-15 [Canis lupus familiaris]
NM_010827.2	novel_mir616,novel_mir4987,novel_mir3769,novel_mir696,mmu-miR-378a-3p,novel_mir742,novel_mir1472,novel_mir2605,novel_mir6034,novel_mir2490,mmu-miR-3072-3p,novel_mir4529,novel_mir2358,novel_mir4619,novel_mir5724,novel_mir1835,novel_mir234,novel_mir1197,novel_mir242,novel_mir4289,novel_mir5135,novel_mir300,novel_mir4237,mmu-miR-3068-5p,novel_mir3269,novel_mir2718,novel_mir747,novel_mir183,novel_mir…	7mer-1a	NA	-21.2	154	Msc	GO:0005654,GO:0000980,GO:0001206,GO:0046983,GO:0060539,GO:0014707,GO:0000122,GO:0060021,	K09072|1|7.8e-111|405.2|mmu:17681|musculin (activated B-cell factor-1)	gi|568905250|ref|XP_006495523.1|	1.39958e-127	PREDICTED: musculin isoform X3 [Mus musculus]
NM_172561.3	novel_mir4188,novel_mir5464,novel_mir4242,novel_mir1681,novel_mir3437,novel_mir289,novel_mir2699,novel_mir84,novel_mir955,novel_mir138,novel_mir3708,novel_mir3746,novel_mir3414,mmu-miR-182-5p,novel_mir1164,novel_mir1133,novel_mir4348,novel_mir1876,novel_mir2690,novel_mir2194,novel_mir5771,novel_mir3167,novel_mir2272,novel_mir1928,novel_mir1936,novel_mir1473,novel_mir875,novel_mir2869,novel_mir387…	7mer-m8	NA	-26.07	156	Spag7	GO:0005634,GO:0003676,	-	gi|264681516|ref|NP_766149.2|	7.87443e-167	sperm-associated antigen 7 isoform 1 [Mus musculus]
NM_133947.3	novel_mir2905,novel_mir2203,novel_mir882,novel_mir558,novel_mir5995,novel_mir2425,novel_mir3322,novel_mir3976,novel_mir2481,novel_mir301,novel_mir245,novel_mir3129,novel_mir1245,novel_mir129,novel_mir2398,novel_mir5253,novel_mir322,novel_mir4807,novel_mir5537,novel_mir5596,novel_mir5002,novel_mir6077,novel_mir3255,novel_mir3655,novel_mir3733,novel_mir919,novel_mir4273,novel_mir5498,novel_mir357,n…	6mer	NA	-25.86	156	Numa1	GO:0061673,GO:0016363,GO:0030425,GO:0070062,GO:0005813,GO:0097431,GO:0005938,GO:0043025,GO:0005654,GO:0045177,GO:0008017,GO:0060487,GO:0000132,	K16808|1|0.0e+00|3977.6|mmu:101706|nuclear mitotic apparatus protein 1	gi|568949263|ref|XP_006507232.1|	0	PREDICTED: nuclear mitotic apparatus protein 1 isoform X2 [Mus musculus]
NM_016776.2	novel_mir2276,novel_mir2611,novel_mir4147,novel_mir3897,novel_mir2348,novel_mir183,novel_mir4844,novel_mir4515,novel_mir140,novel_mir350,novel_mir3667,novel_mir4807,novel_mir637,novel_mir3819,novel_mir295,novel_mir5641,novel_mir4856,novel_mir999,novel_mir4855,novel_mir1463,novel_mir124,novel_mir1449,novel_mir5501,novel_mir214,novel_mir695,novel_mir3790,novel_mir3079,novel_mir1068,novel_mir1959,no…	7mer-1a	NA	-20.38	143	Mybbp1a	GO:0016020,GO:0005737,GO:0005730,GO:0042564,GO:0003714,GO:0008270,GO:0003887,GO:0001047,GO:0043565,GO:0008134,GO:0001649,GO:0032922,GO:0006913,GO:0072332,GO:2000210,GO:0045892,GO:0042149,GO:0071158,GO:0022904,	K02331|1|0.0e+00|2287.3|cge:100758378|DNA polymerase phi [EC:2.7.7.7]	gi|31982724|ref|NP_058056.2|	0	myb-binding protein 1A [Mus musculus]
NM_015814.2	novel_mir1441,novel_mir2089,novel_mir1405,novel_mir3515,novel_mir4968,novel_mir343,novel_mir636,novel_mir1466,novel_mir551,novel_mir5456,novel_mir3200,novel_mir5313,mmu-miR-7058-5p,novel_mir4189,novel_mir3325,novel_mir2710,mmu-let-7k,novel_mir4462,novel_mir125,novel_mir2281,novel_mir4699,novel_mir233,novel_mir188,novel_mir3150,novel_mir4329,novel_mir1814,novel_mir5540,novel_mir2755,novel_mir4285,…	6mer	NA	-23.29	156	Dkk3	GO:0005615,GO:0007275,GO:0032348,GO:0090090,GO:2000065,GO:0045892,	K02165|1|8.9e-10|70.5|ncc:104955819|dickkopf	gi|148685077|gb|EDL17024.1|	0	dickkopf homolog 3 (Xenopus laevis), isoform CRA_d [Mus musculus]
NM_148945.2	novel_mir215,novel_mir5812,novel_mir2194,novel_mir1024,mmu-miR-370-3p,novel_mir3643,novel_mir2140,novel_mir4677,mmu-miR-877-5p,novel_mir267,novel_mir3728,novel_mir3355,novel_mir1201,novel_mir450,novel_mir939,novel_mir4374,novel_mir909,novel_mir3280,novel_mir713,novel_mir3635,novel_mir5105,novel_mir1411,novel_mir4754,novel_mir3425,novel_mir1437,novel_mir1568,novel_mir522,novel_mir1691,novel_mir277…	7mer-m8	NA	-21.22	149	Rps6ka3	GO:0005622,GO:0019901,GO:0043027,GO:0004674,GO:0000287,GO:0005524,GO:0032496,GO:0002224,GO:0043154,GO:0006468,GO:0045944,GO:0035556,	K04373|1|0.0e+00|1492.2|bta:511190|ribosomal protein S6 kinase alpha-1/2/3/6 [EC:2.7.11.1]	gi|545884284|ref|XP_005673546.1|	0	PREDICTED: ribosomal protein S6 kinase alpha-3 isoform X1 [Sus scrofa]
NM_008975.3	novel_mir1210,novel_mir297,novel_mir2298,novel_mir1166,novel_mir1058,novel_mir1958,novel_mir344,novel_mir1367,novel_mir894,novel_mir2402,novel_mir2865,novel_mir347,novel_mir1527,novel_mir1656,novel_mir2364,novel_mir712,novel_mir1681,novel_mir1073,novel_mir4463,novel_mir2597,novel_mir389,mmu-miR-337-3p,novel_mir4290,novel_mir2174,novel_mir3301,novel_mir431,novel_mir5130,novel_mir1668,novel_mir3167…	7mer-1a	NA	-20.63	155	Ptp4a3	GO:0005768,GO:0005634,GO:0005886,GO:0004725,GO:0008138,GO:0035335,GO:1900746,GO:0043542,GO:0007219,GO:0043117,	K18041|1|6.1e-97|360.1|mmu:19245|protein tyrosine phosphatase type IVA [EC:3.1.3.48]	gi|31543527|ref|NP_033001.2|	1.99037e-128	protein tyrosine phosphatase type IVA 3 isoform 1 [Mus musculus]
NM_021353.3	novel_mir5561,novel_mir1305,novel_mir133,novel_mir1623,novel_mir3037,novel_mir420,novel_mir5856,novel_mir867,novel_mir3086,novel_mir772,novel_mir2259,novel_mir1017,novel_mir4513,novel_mir450,novel_mir3521,novel_mir1760,novel_mir1825,novel_mir2231,novel_mir748,novel_mir4549,novel_mir2871,novel_mir4754	6mer	NA	-24.03	141	Slc26a3	GO:0005887,GO:0031526,GO:0097225,GO:0016324,GO:0005254,GO:0015301,GO:0005515,GO:0015106,GO:0008271,GO:0019531,GO:0048240,GO:0019532,GO:1902358,GO:0015701,GO:0060081,GO:1902476,GO:0051454,GO:0071320,	K14078|1|0.0e+00|1424.5|rno:114629|solute carrier family 26 (chloride anion exchanger), member 3	gi|10946676|ref|NP_067328.1|	0	chloride anion exchanger [Mus musculus]
NM_173453.3	novel_mir432,mmu-miR-7051-5p,novel_mir4049,novel_mir2954,novel_mir4386,novel_mir896,novel_mir3714,novel_mir1764,novel_mir5752,novel_mir3733,novel_mir4941,novel_mir78,novel_mir5498,novel_mir3697,mmu-miR-214-3p,novel_mir4508,novel_mir4376,novel_mir4318,novel_mir2972,novel_mir2558,novel_mir383,novel_mir1712,novel_mir129,novel_mir4681,novel_mir3784,novel_mir45,novel_mir540,novel_mir3243,novel_mir2905…	7mer-m8	NA	-30.17	168	Tmem11	GO:0031305,GO:0007005,	-	gi|27734998|ref|NP_775655.1|	3.38798e-139	transmembrane protein 11, mitochondrial isoform 1 [Mus musculus]
NM_008924.2	novel_mir5101,novel_mir3994,novel_mir4202,novel_mir1171,novel_mir1537,novel_mir6089,novel_mir429,novel_mir585,novel_mir1506,novel_mir4428,novel_mir3322,novel_mir2585,novel_mir2184,novel_mir2337,novel_mir1381,novel_mir1011,novel_mir3420,novel_mir5641,novel_mir129,novel_mir4199,novel_mir1321,novel_mir2611,novel_mir274,mmu-miR-187-3p,novel_mir5596,novel_mir1458,novel_mir490,novel_mir3304,novel_mir46…	7mer-1a	NA	-30.16	161	Prkar2a	GO:0005925,GO:0031588,GO:0044853,GO:0005813,GO:0005952,GO:0030315,GO:0048471,GO:0070062,GO:0008603,GO:0016301,GO:0030552,GO:0019904,GO:0031625,GO:0034236,GO:0042803,GO:0004862,GO:0051291,GO:0097338,GO:2000480,	K04739|1|2.6e-229|800.0|mmu:19087|cAMP-dependent protein kinase regulator	gi|22550094|ref|NP_032950.1|	0	cAMP-dependent protein kinase type II-alpha regulatory subunit [Mus musculus]
NM_015737.4	novel_mir672,novel_mir715,novel_mir5829,novel_mir360,novel_mir4318,novel_mir3296,novel_mir5088,novel_mir78,novel_mir1794,novel_mir2920,novel_mir896,novel_mir3882,novel_mir2737,novel_mir332,mmu-miR-503-5p,novel_mir4749,novel_mir2082,novel_mir5173,mmu-miR-378a-5p,novel_mir83,novel_mir830,novel_mir1746,novel_mir674,novel_mir1781,novel_mir4816,mmu-miR-22-3p,novel_mir5326,novel_mir5211,novel_mir305,no…	6mer	NA	-21.3	158	Galnt4	GO:0005794,GO:0016021,GO:0070062,GO:0048471,GO:0004653,GO:0046872,GO:0030246,	K00710|1|0.0e+00|1209.9|mmu:14426|polypeptide N-acetylgalactosaminyltransferase [EC:2.4.1.41]	gi|7657112|ref|NP_056552.1|	0	polypeptide N-acetylgalactosaminyltransferase 4 [Mus musculus]
NM_028146.4	novel_mir1700,novel_mir755,novel_mir2369,novel_mir1050,novel_mir5995,novel_mir5806,novel_mir585,novel_mir5795,novel_mir1506,novel_mir1011,novel_mir1573,novel_mir1381,novel_mir4807,novel_mir5364,novel_mir3529,novel_mir4058,novel_mir3953,novel_mir3655,novel_mir4649,novel_mir1312,novel_mir5399,novel_mir357,mmu-miR-6991-3p,novel_mir4563,novel_mir5654,novel_mir2781,novel_mir4964,novel_mir3866,mmu-miR-…	6mer	NA	-21.09	148	Dbndd1	GO:0005737,	K20189|1|6.5e-09|66.6|aju:106974179|dysbindin	gi|755527279|ref|XP_011246812.1|	8.75733e-88	PREDICTED: dysbindin domain-containing protein 1 isoform X3 [Mus musculus]
NM_011827.3	novel_mir685,mmu-miR-8116,novel_mir821,novel_mir1648,novel_mir5562,novel_mir5313,novel_mir3889,novel_mir3864,novel_mir2477,novel_mir83,novel_mir4337,novel_mir4093,novel_mir582,novel_mir4361,mmu-miR-467d-5p,novel_mir4958,novel_mir4837,novel_mir644,mmu-miR-467c-5p,novel_mir5771,novel_mir1649	8mer-1a	NA	-27.52	151	Hcst	GO:0009986,GO:0016021,GO:0005102,GO:0043548,GO:0050776,GO:0006468,GO:0014068,	K07988|1|5.2e-38|161.4|mmu:23900|hematopoietic cell signal transducer	gi|93102419|ref|NP_035957.2|	2.81046e-49	hematopoietic cell signal transducer precursor [Mus musculus]
NM_028847.1	novel_mir1244,novel_mir972	6mer	NA	-20.33	164	Mageb5	-	K22823|1|9.6e-42|175.3|mcf:102137142|non-structural maintenance of chromosomes element 3	gi|241982684|ref|NP_083123.1|	0	melanoma antigen, family B, 5 [Mus musculus]
NM_027122.3	novel_mir840,novel_mir1841,novel_mir5182,novel_mir1365,novel_mir5755,novel_mir145,novel_mir2979,novel_mir1403,novel_mir115,novel_mir799,mmu-miR-15a-3p,novel_mir756,novel_mir4749,novel_mir1798,novel_mir6059,novel_mir1297,novel_mir5217,novel_mir5130,novel_mir191,mmu-miR-6991-3p,novel_mir227,novel_mir5307,novel_mir2683,novel_mir3872,novel_mir269,novel_mir4108,novel_mir2786,novel_mir2343,novel_mir437…	8mer-1a	NA	-21.41	144	Mfsd3	GO:0005789,GO:0005887,GO:0015295,GO:0008521,GO:0015876,GO:0055085,GO:0015992,	K10730|1|1.4e-16|92.4|mmu:79456|ATP-dependent DNA helicase Q4 [EC:3.6.4.12]	gi|31560112|ref|NP_081398.2|	0	major facilitator superfamily domain-containing protein 3 [Mus musculus]
NM_001009546.1	novel_mir2371,mmu-miR-1306-3p,novel_mir853,novel_mir4179,novel_mir5426,novel_mir2310,novel_mir1127,novel_mir4361,novel_mir5936,novel_mir612,novel_mir394,novel_mir210,novel_mir945,novel_mir761,mmu-miR-8116,novel_mir727,novel_mir742,novel_mir5835,novel_mir2460,novel_mir2303,novel_mir3324,novel_mir1449,novel_mir5263,novel_mir388,novel_mir4461,novel_mir2802,novel_mir3744,novel_mir697,novel_mir747,nov…	8mer-1a	NA	-22.77	163	Naaladl1	GO:0016021,GO:0016324,GO:0046872,GO:0008237,GO:0016805,GO:0004180,GO:0006508,	K01301|1|0.0e+00|1380.9|rno:83568|N-acetylated-alpha-linked acidic dipeptidase [EC:3.4.17.21]	gi|57222282|ref|NP_001009546.1|	0	N-acetylated-alpha-linked acidic dipeptidase-like protein [Mus musculus]
NM_009458.4	novel_mir5062,novel_mir691,novel_mir1127,novel_mir4361,novel_mir535,mmu-miR-221-5p,novel_mir467,novel_mir1027,novel_mir1377,novel_mir371,novel_mir3657,mmu-miR-215-3p,novel_mir4800,novel_mir2431,novel_mir394,novel_mir6093,novel_mir2169,novel_mir905,novel_mir2944,novel_mir5970,novel_mir459,novel_mir259,novel_mir3318,novel_mir913,mmu-miR-1983,novel_mir2677,novel_mir4260,mmu-miR-6418-3p,novel_mir5458…	7mer-m8	NA	-25.89	161	Ube2b	GO:0000790,GO:0005657,GO:0005829,GO:0005886,GO:0033503,GO:0001741,GO:0043130,GO:0031625,GO:0061631,GO:0005524,GO:0061630,GO:0070979,GO:0001701,GO:0006301,GO:0008284,GO:0006344,GO:0043161,GO:0007288,GO:0070193,GO:0043951,GO:0000237,GO:0060135,GO:0009411,GO:0070534,GO:0033522,GO:0051026,GO:0045141,GO:0050821,GO:0010845,GO:0070076,GO:0033128,GO:0060070,GO:0051865,GO:0042493,GO:0043066,GO:0006513,GO:…	K10574|1|3.1e-88|330.5|rno:103694902|ubiquitin-conjugating enzyme E2 B [EC:2.3.2.23]	gi|332234478|ref|XP_003266434.1|	9.90954e-86	PREDICTED: ubiquitin-conjugating enzyme E2 B isoform X5 [Nomascus leucogenys]
XM_006499408.3	novel_mir1326,novel_mir3218,novel_mir2837,novel_mir5792,novel_mir2170,novel_mir63,novel_mir1223,novel_mir1924,novel_mir1688,novel_mir4501,novel_mir2195,novel_mir3512,novel_mir1376,novel_mir1589,novel_mir239,novel_mir4990,novel_mir4453,novel_mir455,novel_mir138,novel_mir927,novel_mir1135,novel_mir1854,novel_mir5337,novel_mir437,novel_mir3565,novel_mir2535,mmu-miR-27b-3p,novel_mir458,novel_mir4652,…	6mer	NA	-22.56	160	Zmynd8	GO:0043198,GO:0043197,GO:0005737,GO:0005634,GO:0042393,GO:0000977,GO:0003712,GO:0047485,GO:0003682,GO:0060999,GO:1902897,GO:1902952,GO:0098815,GO:0006355,GO:0051491,	K20289|1|9.2e-23|114.4|shx:MS3_09297|conserved oligomeric Golgi complex subunit 2!K22016|4|7.8e-14|84.7|tup:102472440|mucin-3/17	gi|568916754|ref|XP_006499447.1|	0	PREDICTED: protein kinase C-binding protein 1 isoform X11 [Mus musculus]
NM_144491.2	novel_mir3323,novel_mir687,novel_mir700,novel_mir898,novel_mir5943,novel_mir2423,novel_mir3533,novel_mir1681,novel_mir4463,novel_mir2115,novel_mir1632,novel_mir502,novel_mir2501,novel_mir1172,novel_mir5484,novel_mir1769,novel_mir3817,novel_mir656,novel_mir3407,novel_mir1585,novel_mir1668,novel_mir4159,novel_mir763,novel_mir3665,novel_mir5923,novel_mir655,novel_mir2915,novel_mir1215,novel_mir297,n…	7mer-m8	NA	-30.64	156	Dph1	GO:0005737,GO:0005634,GO:0034946,GO:0034843,GO:0034869,GO:0044466,GO:0032526,	K07561|1|5.4e-255|884.4|mmu:116905|2-(3-amino-3-carboxypropyl)histidine synthase [EC:2.5.1.108]	gi|18158418|ref|NP_081412.1|	4.159e-161	ovarian cancer-associated gene 2 protein homolog [Mus musculus]
NM_010415.2	novel_mir1894,novel_mir1073,novel_mir5437,novel_mir5800,novel_mir6016,novel_mir389,novel_mir1019,novel_mir4526,novel_mir4186,novel_mir4403,novel_mir4544,novel_mir1259,novel_mir4706,novel_mir5358,novel_mir4183,novel_mir258,novel_mir5350,novel_mir2298,novel_mir4851,novel_mir471,novel_mir290,novel_mir991,novel_mir1304,novel_mir303,mmu-miR-138-1-3p,novel_mir646,novel_mir3400,novel_mir227,novel_mir582…	7mer-m8	NA	-27.33	160	Hbegf	GO:0005887,GO:0005615,GO:0009986,GO:0005154,GO:0008083,GO:0008201,GO:0001525,GO:0030307,GO:0051545,GO:0090303,GO:0008016,GO:0007173,GO:0048661,GO:0060326,GO:0051897,GO:0001832,GO:0007399,GO:0035313,GO:0051549,	K08523|1|1.0e-116|425.2|mmu:15200|heparin-binding EGF-like growth factor	gi|6754178|ref|NP_034545.1|	1.09515e-150	proheparin-binding EGF-like growth factor precursor [Mus musculus]
NM_007413.4	novel_mir3948,novel_mir4444,novel_mir2704,novel_mir3562,novel_mir1165,novel_mir1324,novel_mir5759,novel_mir1277,novel_mir4124,novel_mir3231,novel_mir3325,novel_mir5923,novel_mir2308,novel_mir758,novel_mir2106,novel_mir3147,novel_mir2265,mmu-miR-709,novel_mir2132,novel_mir173,novel_mir5239,novel_mir3099,novel_mir5480,novel_mir4298,novel_mir1172,novel_mir520,novel_mir4126,novel_mir431,novel_mir215,…	7mer-m8	NA	-21.8	157	Adora2b	GO:0009986,GO:0016021,GO:0005886,GO:0001609,GO:0032755,GO:0008284,GO:0045765,GO:0031668,GO:0060087,GO:0032966,GO:0010575,GO:0001973,GO:0010701,GO:0032722,GO:0010893,GO:0008285,GO:0007189,GO:0031284,GO:0043306,GO:0030819,GO:0002882,	K04267|1|6.5e-188|661.4|mmu:11541|adenosine receptor A2b	gi|31560741|ref|NP_031439.2|	0	adenosine receptor A2b [Mus musculus]
NM_031184.3	novel_mir3650,novel_mir1082,novel_mir3680,novel_mir3507,novel_mir3325,novel_mir393,novel_mir2043,novel_mir3619,novel_mir2710,novel_mir1187,novel_mir1281,novel_mir299,novel_mir1968,novel_mir2541,novel_mir343,novel_mir4570,novel_mir2775,novel_mir2366,novel_mir642,novel_mir1206,novel_mir2657,mmu-miR-470-5p,novel_mir4808,novel_mir1873,novel_mir4935,novel_mir1276,novel_mir116,novel_mir3718,mmu-miR-768…	7mer-m8	NA	-20.57	154	Glis2	GO:0016607,GO:0005737,GO:0005667,GO:0005515,GO:0001077,GO:0000977,GO:0046872,GO:0000122,GO:0061005,GO:0043433,GO:0060994,GO:0045944,GO:0007399,GO:1900182,GO:0045879,	K09233|1|0.0e+00|1095.9|mmu:83396|zinc finger protein GLIS2	gi|755554262|ref|XP_011244352.1|	0	PREDICTED: zinc finger protein GLIS2 isoform X4 [Mus musculus]
NM_027661.2	novel_mir4065,novel_mir646,novel_mir1072,novel_mir701,novel_mir213,novel_mir345,novel_mir1290,novel_mir824,novel_mir609,novel_mir171,novel_mir991,mmu-miR-361-5p,novel_mir4499,novel_mir3649,novel_mir501,novel_mir1294	6mer	NA	-27.61	158	Hsfy2	GO:0005634,GO:0043565,GO:0003700,GO:0006355,	K16482|1|2.7e-24|117.5|ccae:111935160|centriolar protein POC1!K15694|3|8.9e-12|75.9|mze:101480214|RING finger protein 43 [EC:2.3.2.27]!K01895|4|1.1e-09|68.9|gfr:106631953|acetyl-CoA synthetase [EC:6.2.1.1]!K09417|5|3.9e-07|60.5|mdo:100019915|heat shock transcription factor 4	gi|58037231|ref|NP_081937.1|	0	heat shock transcription factor, Y-linked [Mus musculus]
NM_178748.6	novel_mir1764,novel_mir1543,novel_mir2717,novel_mir3257,novel_mir4304,novel_mir1767,novel_mir283,mmu-miR-7051-5p,novel_mir426,novel_mir49,novel_mir144,novel_mir4091,novel_mir3742,novel_mir1467,novel_mir4993,novel_mir118,novel_mir5587,novel_mir3434,novel_mir5399,novel_mir2781,novel_mir1834,novel_mir3044,novel_mir4452,novel_mir4991,novel_mir5193,novel_mir5382,novel_mir3343,novel_mir5596,novel_mir13…	6mer	NA	-23.52	149	Egflam	GO:0030054,GO:0005614,GO:0005604,GO:0045202,GO:0005515,GO:0005509,GO:0005539,GO:0010811,GO:0019800,GO:0030198,	K06254|1|3.9e-91|341.3|pbi:103050701|agrin!K06255|5|1.4e-85|322.8|srx:107745451|basement membrane-specific heparan sulfate proteoglycan core protein	gi|30520197|ref|NP_848863.1|	0	pikachurin isoform 2 precursor [Mus musculus]
NM_011175.2	novel_mir3731,novel_mir663,novel_mir258,novel_mir3579,novel_mir232,novel_mir635,novel_mir583,novel_mir1856,novel_mir2535,novel_mir835,novel_mir199,novel_mir2277,novel_mir1655,novel_mir3800,novel_mir1854,novel_mir592,novel_mir2649,novel_mir1013,novel_mir3441,novel_mir2140,novel_mir448,novel_mir3985,novel_mir1589,novel_mir1579,novel_mir4481,novel_mir756,novel_mir5540,novel_mir3708,novel_mir3787,nov…	7mer-1a	NA	-24.35	165	Lgmn	GO:0005764,GO:0070062,GO:0005770,GO:0045177,GO:0004197,GO:0003014,GO:0006624,GO:0051603,GO:0032801,GO:1901185,GO:0010447,GO:0043524,GO:0040015,	K01369|1|1.5e-261|906.0|mmu:19141|legumain [EC:3.4.22.34]	gi|7242187|ref|NP_035305.1|	0	legumain precursor [Mus musculus]
NM_011447.3	mmu-miR-7682-3p,novel_mir3191,novel_mir4520,novel_mir1281,novel_mir4979,novel_mir125,novel_mir3071,novel_mir657,novel_mir328,novel_mir2043,novel_mir2178,novel_mir1368,novel_mir212,novel_mir343,novel_mir1169,novel_mir2541,novel_mir3246,novel_mir1488,novel_mir4005,mmu-miR-298-5p,novel_mir1466,novel_mir1441,novel_mir1907,novel_mir2089,novel_mir4380,novel_mir3490,novel_mir4908,novel_mir4935,novel_mir…	7mer-1a	NA	-21.5	145	Sox8	GO:0044798,GO:0005737,GO:0000979,GO:0000981,GO:0008134,GO:0046982,GO:0072034,GO:0060018,GO:0001701,GO:0048484,GO:0045892,GO:0035914,GO:0007283,GO:0010817,GO:0072289,GO:0048709,GO:0090190,GO:0007165,GO:0014015,GO:0045944,GO:0045444,GO:0001649,GO:0046533,GO:0060612,GO:0045662,GO:0060009,GO:0007422,GO:0043066,GO:0048469,GO:0001755,GO:0072197,GO:0060221,GO:0033690,	K09270|1|2.9e-278|962.2|mmu:20681|transcription factor SOX7/8/10/18 (SOX group E/F)	gi|33563276|ref|NP_035577.1|	0	transcription factor SOX-8 [Mus musculus]
XR_379111.3	novel_mir2173,novel_mir1425,novel_mir1229,mmu-miR-154-5p,novel_mir4536,novel_mir244,novel_mir2060,novel_mir4989,novel_mir426,mmu-miR-7051-5p,novel_mir3742,novel_mir2026,novel_mir2442,novel_mir2781,novel_mir1647,novel_mir858,novel_mir1794,novel_mir1838,novel_mir4675,novel_mir4735,novel_mir137,novel_mir1439,novel_mir5364,novel_mir4807,novel_mir2398,novel_mir2047,novel_mir4542,novel_mir1506,novel_mi…	7mer-m8	NA	-46.12	308	Foxred1	-	-	-	-	-
NM_011432.2	novel_mir2253,novel_mir1805,novel_mir3210,novel_mir4918,novel_mir788,novel_mir589,novel_mir1864,novel_mir999,novel_mir1409,novel_mir439,novel_mir425,novel_mir1440,novel_mir4257,novel_mir56,mmu-miR-24-3p,novel_mir517,novel_mir3701	7mer-m8	NA	-21.55	166	Snrpc	GO:0015030,GO:0005685,GO:0071004,GO:0000243,GO:0030627,GO:0003729,GO:0030619,GO:0008270,GO:1990446,GO:0003727,GO:0042803,GO:0000395,GO:0000387,	K11095|1|3.0e-102|375.6|mcc:718654|U1 small nuclear ribonucleoprotein C	gi|795604345|ref|XP_011727472.1|	4.10064e-106	PREDICTED: U1 small nuclear ribonucleoprotein C [Macaca nemestrina]
NM_015809.2	novel_mir3400,novel_mir227,novel_mir4387,novel_mir3359,novel_mir1050,novel_mir887,novel_mir1403,novel_mir480,novel_mir115,novel_mir1966,novel_mir2573,novel_mir2269,novel_mir4515,novel_mir768,novel_mir5313,novel_mir912,novel_mir2024,novel_mir274,novel_mir1544,novel_mir5088,novel_mir5771,novel_mir121,novel_mir691,novel_mir3434,novel_mir4318,novel_mir4361,novel_mir832,novel_mir1473,novel_mir683,nove…	6mer	NA	-41.16	302	Krtap5-4	GO:0045095,	K11651|1|6.7e-30|135.6|dnx:107163382|SWI/SNF-related matrix-associated actin-dependent regulator of chromatin subfamily E, member 1	gi|7657285|ref|NP_056624.1|	3.18743e-106	keratin-associated protein 5-4 [Mus musculus]
XM_006508742.1	novel_mir5477,novel_mir65,novel_mir3897,novel_mir1271,novel_mir908,novel_mir4599,novel_mir3329,novel_mir508,novel_mir238,novel_mir4598,mmu-miR-326-3p,novel_mir5247,novel_mir1436,novel_mir2759,novel_mir479,novel_mir833,novel_mir4630	7mer-m8	NA	-57.07	307	Stxbp2	GO:0030027,GO:0042581,GO:0042582,GO:0070820,GO:0005829,GO:0044194,GO:0098793,GO:0070062,GO:0031201,GO:0016324,GO:0042589,GO:0030348,GO:0017075,GO:0006904,GO:0015031,GO:0043304,GO:0043312,GO:0010447,GO:0016079,GO:0001909,	K15300|1|0.0e+00|1167.9|mmu:20911|syntaxin-binding protein 2	gi|568953206|ref|XP_006508805.1|	0	PREDICTED: syntaxin-binding protein 2 isoform X1 [Mus musculus]
NM_178113.3	novel_mir5008,novel_mir302,novel_mir4781,novel_mir1624,novel_mir1838,novel_mir3636,novel_mir1794,novel_mir2920,novel_mir5741,novel_mir4223,novel_mir23,novel_mir1240,novel_mir5557,novel_mir377,novel_mir5354,mmu-miR-138-5p,novel_mir1728,novel_mir1959,novel_mir264,novel_mir305,novel_mir3962,novel_mir1075,novel_mir2143,novel_mir3082,novel_mir4077,novel_mir2598,novel_mir359,novel_mir1499,novel_mir4568…	6mer	NA	-24.89	156	Ncapd3	-	K11491|1|0.0e+00|2626.7|rno:315508|condensin-2 complex subunit D3	gi|568960257|ref|XP_006510760.1|	0	PREDICTED: condensin-2 complex subunit D3 isoform X1 [Mus musculus]
NM_023420.2	novel_mir1490,novel_mir535,novel_mir723,novel_mir1023,novel_mir4361,novel_mir705,novel_mir3707,novel_mir691,novel_mir65,novel_mir4738,novel_mir2446,novel_mir4959,novel_mir169,novel_mir1857,mmu-miR-8116,novel_mir1648,novel_mir2064,novel_mir1766,novel_mir4246,novel_mir2653,mmu-miR-136-5p,novel_mir5284,novel_mir952,novel_mir4900,novel_mir5642,novel_mir3835,novel_mir3229,novel_mir5855,novel_mir2234,n…	7mer-m8	NA	-25.31	151	Col4a3bp	GO:0005829,GO:0005739,GO:0048471,GO:0005654,GO:0005794,GO:0005783,GO:0035620,GO:0070273,GO:0016301,GO:0097001,GO:0034976,GO:0007029,GO:0000902,GO:0070584,GO:0003007,GO:0007165,GO:0006672,GO:0055088,GO:0008283,GO:0035621,GO:0001701,GO:0006936,	K08283|1|0.0e+00|1431.4|ngi:103731356|collagen type IV alpha-3-binding protein	gi|12963671|ref|NP_075909.1|	0	collagen type IV alpha-3-binding protein isoform 1 [Mus musculus]
NM_019976.3	novel_mir955,mmu-miR-2137,novel_mir4138,novel_mir2597,novel_mir84,novel_mir634,novel_mir1924,novel_mir3190,novel_mir2767,novel_mir625,novel_mir2470,novel_mir1694,novel_mir5271,novel_mir2396,novel_mir1894,mmu-miR-378d,novel_mir577,novel_mir673,novel_mir1259,novel_mir592,novel_mir238,novel_mir2378,novel_mir5337,novel_mir1932,novel_mir2673,novel_mir908,novel_mir154,novel_mir2580,novel_mir3518,novel_…	6mer	NA	-22.83	155	Psrc1	GO:0005829,GO:0030496,GO:0005876,GO:0000922,GO:0008017,GO:0045893,GO:0007080,GO:0051301,GO:0060236,GO:0045737,GO:0030308,GO:0001578,GO:0031116,	K21443|1|1.4e-184|650.2|mmu:56742|proline/serine-rich coiled-coil protein 1	gi|9910192|ref|NP_064360.1|	0	proline/serine-rich coiled-coil protein 1 [Mus musculus]
NM_011952.2	novel_mir333,novel_mir4023,mmu-miR-322-5p,novel_mir2831,novel_mir486,novel_mir2665,novel_mir4192,novel_mir6060,novel_mir1446,mmu-miR-8107,novel_mir3277,novel_mir906,novel_mir5812,novel_mir3908,mmu-miR-3473b,novel_mir1013,novel_mir3952,novel_mir1062,novel_mir2623,novel_mir1206,novel_mir172,novel_mir5599,novel_mir5681,novel_mir669,novel_mir2714,novel_mir3606,novel_mir4188,novel_mir677,novel_mir356,…	7mer-1a	NA	-54.83	304	Mapk3	GO:0005925,GO:0005901,GO:0043234,GO:0005829,GO:0005654,GO:0070062,GO:0005769,GO:0005794,GO:0005739,GO:0005635,GO:0005770,GO:0015630,GO:0031143,GO:0004707,GO:0001784,GO:0097110,GO:0019902,GO:0005524,GO:0006461,GO:0030878,GO:0009636,GO:0038083,GO:0030278,GO:0006915,GO:0090170,GO:0006975,GO:0070374,GO:0045727,GO:0031663,GO:0060324,GO:0033129,GO:2000657,GO:0060020,GO:0060440,GO:0070498,GO:0019233,GO:…	K04371|1|2.3e-222|775.8|mmu:26417|mitogen-activated protein kinase 1/3 [EC:2.7.11.24]	gi|21489933|ref|NP_036082.1|	0	mitogen-activated protein kinase 3 [Mus musculus]
NM_145473.3	novel_mir1065,novel_mir356,novel_mir3438,novel_mir2305,novel_mir1128,novel_mir433,novel_mir5504,novel_mir2140,novel_mir365,novel_mir3076,mmu-miR-486b-3p,novel_mir4096,novel_mir3358,novel_mir3494,novel_mir781,novel_mir5812,novel_mir1424,novel_mir653,novel_mir4783,novel_mir5811,novel_mir187,novel_mir4281,novel_mir4553,novel_mir3202,novel_mir5407,novel_mir1113,novel_mir1464,novel_mir975,novel_mir545…	7mer-m8	NA	-51.82	323	Csdc2	GO:0005737,GO:0005634,GO:0003723,GO:0003677,GO:0008134,GO:0006355,GO:0006397,	K15441|1|4.3e-25|120.9|tsp:Tsp_04322|tRNA-specific adenosine deaminase 2 [EC:3.5.4.-]!K00503|2|7.3e-25|120.2|dpl:KGM_207724|dopamine beta-monooxygenase [EC:1.14.17.1]	gi|269914112|ref|NP_663448.2|	3.77049e-109	cold shock domain-containing protein C2 [Mus musculus]
NM_031842.2	novel_mir5724,novel_mir779,novel_mir4619,novel_mir3744,novel_mir3172,novel_mir6020,novel_mir3899,novel_mir952,novel_mir788,novel_mir901,novel_mir3457,novel_mir207,novel_mir1266,novel_mir1758,novel_mir2653,novel_mir1766,novel_mir2453,novel_mir4697,novel_mir2758,novel_mir853,novel_mir2744,novel_mir980,novel_mir4052,novel_mir2076,novel_mir975,novel_mir2918,novel_mir1151,novel_mir4196,novel_mir1568,n…	6mer	NA	-20.77	154	Smarcd1	GO:0071565,GO:0016514,GO:0071564,GO:0005102,GO:0003713,GO:0003682,GO:0032947,GO:0006357,GO:0048096,GO:0006337,GO:0071398,GO:0007399,	K11650|1|6.3e-308|1060.8|hgl:101704168|SWI/SNF-related matrix-associated actin-dependent regulator of chromatin subfamily D	gi|125347396|ref|NP_114030.2|	0	SWI/SNF-related matrix-associated actin-dependent regulator of chromatin subfamily D member 1 [Mus musculus]
NM_001167891.1	novel_mir5107,novel_mir4018,novel_mir3664,mmu-miR-139-3p,novel_mir5465,novel_mir722,novel_mir3848,novel_mir5346,novel_mir3511,novel_mir4723,novel_mir394,novel_mir416,novel_mir881,mmu-miR-676-3p,novel_mir5185,novel_mir3707,novel_mir1679,novel_mir6017,novel_mir2164,novel_mir404,novel_mir316,novel_mir4054,novel_mir3695,novel_mir4355,mmu-miR-1306-3p,novel_mir5426,novel_mir4179,novel_mir994,novel_mir4…	6mer	NA	-20.37	154	Nrg2	GO:0005615,GO:0005622,GO:0005886,GO:0016021,GO:0008083,GO:0005154,GO:0005006,GO:0043125,GO:0035556,GO:0048513,GO:0007173,	K05456|1|0.0e+00|1738.8|mmu:100042150|neuregulin 2	gi|569002888|ref|XP_006525524.1|	0	PREDICTED: pro-neuregulin-2, membrane-bound isoform isoform X1 [Mus musculus]
NM_009162.3	novel_mir2729,novel_mir2808,novel_mir5960,novel_mir4479,novel_mir4249,novel_mir2541,novel_mir4961,novel_mir343,novel_mir836,novel_mir1058,novel_mir1461,novel_mir655,novel_mir5798,novel_mir983,novel_mir1956,novel_mir4607,novel_mir2003,novel_mir3524,novel_mir5480,novel_mir5882,novel_mir3893,novel_mir5021,novel_mir5529,novel_mir4926,novel_mir1991,novel_mir5639,novel_mir5610,novel_mir1070,novel_mir70…	8mer-1a	NA	-22.68	148	Scg5	GO:0030141,GO:0005576,GO:0004857,GO:0051082,GO:0016486,GO:0006886,GO:0046883,GO:0007218,	-	gi|148695909|gb|EDL27856.1|	6.5459e-158	secretogranin V, isoform CRA_a, partial [Mus musculus]
NM_175160.3	novel_mir355,novel_mir4864,novel_mir398,novel_mir673,novel_mir1345,novel_mir345,novel_mir5358,novel_mir4069,novel_mir592,mmu-miR-486b-3p,novel_mir5504,novel_mir3277,novel_mir262,novel_mir517,novel_mir84,novel_mir1297,novel_mir898,novel_mir703,novel_mir2100,novel_mir4497,novel_mir433,novel_mir3190,novel_mir2990,novel_mir59,novel_mir2219,novel_mir181,novel_mir235,novel_mir1873,novel_mir5792,novel_m…	7mer-m8	NA	-63.1	340	Zdhhc1	-	K20027|1|8.0e-288|993.4|mmu:70796|palmitoyltransferase ZDHHC1/11 [EC:2.3.1.225]	gi|755527247|ref|XP_011246804.1|	0	PREDICTED: probable palmitoyltransferase ZDHHC1 isoform X3 [Mus musculus]
XM_006517725.3	mmu-miR-193a-3p,novel_mir1860,mmu-miR-3470a,mmu-miR-149-5p,novel_mir3571,novel_mir4105,novel_mir6013,novel_mir5481,novel_mir4598,novel_mir440,novel_mir4592,novel_mir807,novel_mir3915,novel_mir564,novel_mir5242,novel_mir680,novel_mir1359,novel_mir2155,novel_mir123,novel_mir4356,novel_mir5145,novel_mir858,novel_mir2773,novel_mir1469,novel_mir1878,novel_mir45,novel_mir1712,novel_mir383,novel_mir738,…	6mer	NA	-24.01	162	Bdp1	-	K15198|1|0.0e+00|4796.5|mmu:544971|transcription factor TFIIIB component B''	gi|568984622|ref|XP_006517788.1|	0	PREDICTED: transcription factor TFIIIB component B'' homolog isoform X1 [Mus musculus]
NM_198037.1	novel_mir3107,novel_mir1603,novel_mir3574,novel_mir5062,mmu-miR-324-3p,novel_mir4874,novel_mir1914,novel_mir3610,novel_mir2682,novel_mir353,novel_mir103,novel_mir3375,novel_mir3671,novel_mir5069,novel_mir862,novel_mir4773,novel_mir3774,novel_mir2835,novel_mir1981,novel_mir5213,novel_mir324,novel_mir622,novel_mir3485,novel_mir4391,novel_mir4431,novel_mir4473,novel_mir905,novel_mir4193,novel_mir433…	6mer	NA	-46.3	304	Cachd1	GO:0016021,GO:0006816,	K10798|1|1.7e-73|282.7|cin:100186084|poly [ADP-ribose] polymerase [EC:2.4.2.30]!K04860|2|2.8e-36|159.1|spis:111336301|voltage-dependent calcium channel alpha-2/delta-3!K04859|5|9.1e-27|127.5|pbi:103063628|voltage-dependent calcium channel alpha-2/delta-2	gi|39930563|ref|NP_932154.1|	0	VWFA and cache domain-containing protein 1 precursor [Mus musculus]
NM_001081278.2	novel_mir1362,novel_mir5898,novel_mir2063,novel_mir84,novel_mir1579,novel_mir4453,novel_mir729,novel_mir3293,novel_mir2639,novel_mir3029,novel_mir2990,novel_mir3212,novel_mir484,novel_mir1204,novel_mir1326,novel_mir3218,novel_mir2699,novel_mir3521,novel_mir4155,novel_mir5099,novel_mir2694,novel_mir3099,mmu-miR-27b-3p,novel_mir458,novel_mir238,novel_mir3019,novel_mir1079,novel_mir1135,novel_mir176…	6mer	NA	-20.43	148	Tbc1d4	-	K17902|1|0.0e+00|2489.5|mmu:210789|TBC1 domain family member 4	gi|163644270|ref|NP_001074747.2|	0	TBC1 domain family member 4 [Mus musculus]
NM_030678.3	novel_mir1249,mmu-miR-150-5p,novel_mir1137,novel_mir1512,novel_mir1027,novel_mir1237,novel_mir5119,novel_mir5024,novel_mir5769,novel_mir1207,novel_mir1302,novel_mir862,novel_mir4645,mmu-miR-299a-3p,novel_mir3537,novel_mir2835,novel_mir3613,novel_mir103,novel_mir247,novel_mir1852,mmu-miR-140-5p,novel_mir52,novel_mir4193,novel_mir2112,novel_mir257,novel_mir479,novel_mir1044,novel_mir794,novel_mir97…	6mer	NA	-23.29	145	Gys1	GO:0016234,GO:0005737,GO:0016020,GO:0005536,GO:0004373,GO:0061547,GO:0019901,GO:0007507,GO:0005978,	K00693|1|0.0e+00|1456.0|cfa:611993|glycogen synthase [EC:2.4.1.11]	gi|31560022|ref|NP_109603.2|	0	glycogen [starch] synthase, muscle [Mus musculus]
NM_133219.1	novel_mir3332,novel_mir224,mmu-miR-221-3p,novel_mir2109,novel_mir3868,novel_mir1073,novel_mir3889,novel_mir706,novel_mir3344,novel_mir4706,novel_mir2312,novel_mir1769,novel_mir1649,novel_mir2438,novel_mir1461,novel_mir1770,novel_mir4776,novel_mir1304,novel_mir4216,novel_mir3396,novel_mir2156,novel_mir1868,novel_mir892,novel_mir4398,novel_mir2298,novel_mir911,novel_mir2016,novel_mir435,novel_mir38…	8mer-1a	NA	-22.01	157	Gcnt2	GO:0005794,GO:0016021,GO:0008109,GO:0070374,GO:0007179,GO:0036438,GO:0008284,GO:0034116,GO:0006486,GO:0010812,GO:0010608,GO:0051897,GO:0010718,GO:0030335,	K00742|1|4.4e-205|719.5|rno:306860|N-acetyllactosaminide beta-1,6-N-acetylglucosaminyltransferase [EC:2.4.1.150]	gi|39995104|ref|NP_573482.1|	0	N-acetyllactosaminide beta-1,6-N-acetylglucosaminyl-transferase isoform C [Mus musculus]
NM_009736.3	novel_mir482,novel_mir745,novel_mir1108,novel_mir1489,novel_mir5461,novel_mir3883,novel_mir4396,novel_mir2222,novel_mir2703,novel_mir5671,novel_mir2240,novel_mir317,novel_mir2918,novel_mir3701,novel_mir1166,novel_mir4945,novel_mir6162,novel_mir4694,novel_mir254,novel_mir2269,novel_mir3191,novel_mir1662,novel_mir1877,novel_mir771,novel_mir179,novel_mir3693,novel_mir1856,novel_mir583,novel_mir2831,…	6mer	NA	-24.8	154	Bag1	GO:0005829,GO:0048471,GO:0005634,GO:0005739,GO:0051087,GO:0051219,GO:2000672,GO:0035094,GO:0070585,GO:0070389,GO:0001933,GO:0042493,GO:0045944,GO:0043525,GO:0010226,GO:0030182,	K09555|1|2.6e-194|682.2|mmu:12017|BCL2-associated athanogene 1	gi|157952206|ref|NP_033866.4|	0	BAG family molecular chaperone regulator 1 isoform 1L [Mus musculus]
NM_053107.4	novel_mir2599,novel_mir1738,novel_mir429,novel_mir569,novel_mir5197,novel_mir245,novel_mir558,novel_mir1213,novel_mir5806,novel_mir3740,novel_mir322,novel_mir1321,novel_mir1130,novel_mir4077,novel_mir1622,novel_mir5382,novel_mir4735,novel_mir3052,novel_mir2430,novel_mir3044,novel_mir4062,novel_mir1467,novel_mir223,novel_mir3609,novel_mir3753,novel_mir1295,novel_mir5446,novel_mir4105,novel_mir1129…	8mer-1a	NA	-23.41	145	Gpr45	-	K08409|1|2.2e-214|750.4|mmu:93690|G protein-coupled receptor 45	-	-	-
NM_009311.2	novel_mir1152,novel_mir244,novel_mir4018,novel_mir530,novel_mir4109,novel_mir1648,novel_mir973,novel_mir1765,novel_mir531,novel_mir1556,novel_mir564,novel_mir2530,mmu-miR-497a-5p,novel_mir2781,novel_mir1312,novel_mir2526,novel_mir4844,novel_mir2154,novel_mir4585,novel_mir4549,novel_mir400,novel_mir1381,novel_mir2467,novel_mir3951,novel_mir2168,novel_mir4385,novel_mir3840,novel_mir532,novel_mir197…	8mer-1a	NA	-29.53	148	Tac1	GO:0005829,GO:0005615,GO:0030424,GO:0005886,GO:0043025,GO:0031835,GO:0007218,GO:0019731,GO:0032230,GO:0050830,GO:0045760,GO:0007204,GO:0032224,GO:0046878,GO:0001878,GO:0019233,GO:0008306,GO:0008217,GO:0009725,GO:0010459,GO:2000854,GO:0045087,GO:0048265,GO:0051496,GO:0007217,GO:0002675,GO:1990090,GO:0019732,GO:0010634,GO:0043278,GO:0045778,GO:0050829,GO:0035815,GO:0050671,GO:0007616,GO:0032496,	K05239|1|2.6e-69|266.5|rro:104668751|tachykinin 1	gi|6678207|ref|NP_033337.1|	3.33342e-93	protachykinin-1 isoform 1 precursor [Mus musculus]
XM_006539726.3	novel_mir3138,novel_mir4549,novel_mir4002,novel_mir5609,novel_mir278,novel_mir637,novel_mir5692,novel_mir295,novel_mir5916,novel_mir425,novel_mir124,novel_mir423,novel_mir1002,novel_mir77,novel_mir1591,novel_mir142,novel_mir4525,novel_mir358,novel_mir3384,novel_mir5217,novel_mir1542,novel_mir986,novel_mir4564,novel_mir220,novel_mir3664,novel_mir4246,novel_mir1579,novel_mir2026,novel_mir544,novel_…	6mer	NA	-25	152	Tnnt1	GO:0005861,GO:0005523,GO:0031014,GO:0014883,GO:0031444,GO:0045932,	K10372|1|8.4e-137|490.7|mmu:21955|troponin T, slow skeletal muscle	gi|471270250|ref|NP_001264191.1|	3.92025e-175	troponin T, slow skeletal muscle isoform 4 [Rattus norvegicus]
NR_027859.1	novel_mir642,novel_mir1336,novel_mir2330,mmu-miR-470-5p,novel_mir1062,novel_mir5546,novel_mir2616,novel_mir818,novel_mir1440,novel_mir1276,novel_mir3887,novel_mir2993,novel_mir179,novel_mir1672,novel_mir5285,novel_mir5764,novel_mir2426,novel_mir5685,novel_mir2690,mmu-miR-484,novel_mir906,novel_mir620,mmu-miR-31-5p,novel_mir2161,novel_mir657,novel_mir5940,novel_mir2564,novel_mir3153,novel_mir1187,…	7mer-m8	NA	-20.7	147	Pfkfb2	-	-	-	-	-
NM_021295.3	novel_mir1959,novel_mir1600,novel_mir2991,novel_mir5294,novel_mir5741,novel_mir4223,novel_mir1450,novel_mir1860,novel_mir507,novel_mir4663,novel_mir4746,novel_mir1961,novel_mir123,novel_mir440,novel_mir5008,novel_mir3804,novel_mir2442,novel_mir5056,novel_mir847,mmu-miR-206-3p,novel_mir4897,novel_mir2069,novel_mir383,novel_mir115,novel_mir1712,novel_mir3755,novel_mir407,novel_mir3785,novel_mir1439…	6mer	NA	-22.11	161	Lancl1	GO:0005737,GO:0005887,GO:0070062,GO:0050750,GO:0008270,GO:0003824,GO:0017124,GO:0043295,GO:0007186,	K19522|1|2.9e-53|215.3|apla:101793571|membrane transport protein XK!K17509|2|6.0e-51|207.6|cqu:CpipJ_CPIJ006058|pyruvate dehydrogenase phosphatase regulatory subunit	gi|21489937|ref|NP_067270.1|	0	lanC-like protein 1 [Mus musculus]
XM_006497786.3	novel_mir5514,novel_mir5878,novel_mir679,mmu-miR-330-3p,novel_mir240,novel_mir465,novel_mir532,novel_mir588,novel_mir755,novel_mir3771,novel_mir1855,novel_mir1423,novel_mir4767,novel_mir4161,novel_mir5111,novel_mir45,novel_mir4216,novel_mir304,novel_mir1287,novel_mir2032,novel_mir4369,novel_mir1468,novel_mir4177,novel_mir841,novel_mir673,novel_mir1194,mmu-miR-505-5p,mmu-miR-320-3p,novel_mir1794,n…	7mer-m8	NA	-21.11	145	Ptgds	GO:0070062,GO:0005615,GO:0005791,GO:0016020,GO:0005794,GO:0005634,GO:0005501,GO:0004667,GO:0005215,GO:0036094,GO:0005504,GO:0006810,GO:0001516,GO:2000255,GO:0045187,	K01830|1|6.7e-106|387.9|mmu:19215|prostaglandin-H2 D-isomerase [EC:5.3.99.2]	gi|119226208|ref|NP_032989.2|	6.03627e-141	prostaglandin-H2 D-isomerase precursor [Mus musculus]
NM_009377.1	novel_mir2634,mmu-miR-7682-3p,novel_mir5916,novel_mir602,novel_mir2161,novel_mir66,novel_mir2360,novel_mir4920,novel_mir588,novel_mir3923,novel_mir1960,novel_mir1430,novel_mir1907,novel_mir3347,mmu-miR-326-3p,novel_mir146,novel_mir1821,novel_mir491,novel_mir2922,novel_mir2020,novel_mir2892,novel_mir59,novel_mir2357,novel_mir1574,novel_mir2079,novel_mir160,novel_mir1578,novel_mir2755,novel_mir2965…	7mer-m8	NA	-24.41	155	Th	GO:0005829,GO:0005790,GO:0033162,GO:0043204,GO:0043195,GO:0005739,GO:0030425,GO:0009898,GO:0005634,GO:0008021,GO:0035240,GO:0004511,GO:0034617,GO:0019904,GO:0019825,GO:0008198,GO:0008199,GO:0019899,GO:0016597,GO:0035900,GO:0052314,GO:0009414,GO:0007601,GO:0051289,GO:0010259,GO:0007507,GO:0042136,GO:0035902,GO:0051602,GO:0021987,GO:0008016,GO:0009635,GO:0006665,GO:0007605,GO:0031667,GO:0007613,GO:…	K00501|1|8.1e-289|996.5|mmu:21823|tyrosine 3-monooxygenase [EC:1.14.16.2]	gi|6678337|ref|NP_033403.1|	0	tyrosine 3-monooxygenase [Mus musculus]
NM_026184.2	novel_mir183,novel_mir4539,novel_mir3819,novel_mir1452,novel_mir4948,novel_mir2508,novel_mir3991,novel_mir3591,novel_mir2358,novel_mir4834,novel_mir4331,novel_mir5492,novel_mir617,novel_mir622,novel_mir2065,novel_mir2826,novel_mir533,novel_mir395,novel_mir4116,novel_mir1641,novel_mir3610,novel_mir247,novel_mir5062,novel_mir5273,novel_mir86,novel_mir1696,novel_mir3107,novel_mir1762,novel_mir4430,n…	7mer-1a	NA	-20.07	155	Ero1lb	GO:0016020,GO:0005783,GO:0003756,GO:0070191,GO:0033743,GO:0008113,GO:0015035,GO:0006810,GO:0055114,GO:0022417,GO:0045454,GO:0042593,GO:0019471,GO:0030198,GO:0030070,	K10976|1|4.7e-266|922.2|bta:514361|ERO1-like protein beta [EC:1.8.4.-]	gi|568981942|ref|XP_006516793.1|	0	PREDICTED: ERO1-like protein beta isoform X1 [Mus musculus]
NM_133231.2	mmu-miR-24-3p,novel_mir4189,novel_mir3007,novel_mir657,novel_mir1155,novel_mir1281,novel_mir1287,novel_mir1067,novel_mir318,novel_mir745,novel_mir4796,novel_mir1526,novel_mir3923,novel_mir5356,novel_mir588,novel_mir4005,novel_mir3635,novel_mir517,mmu-miR-470-5p,novel_mir4908,novel_mir1873,novel_mir3438,novel_mir677,novel_mir6130,novel_mir2511,novel_mir4368,novel_mir1313,novel_mir5931,novel_mir218…	7mer-m8	NA	-20.03	157	Rfxap	GO:0005634,GO:0003677,GO:0045893,	K08063|1|9.9e-127|458.4|mmu:170767|regulatory factor X-associated protein	gi|18875392|ref|NP_573494.1|	2.77681e-168	regulatory factor X-associated protein [Mus musculus]
NM_134247.3	novel_mir1377,novel_mir4459,novel_mir2394,novel_mir5844,novel_mir1702,novel_mir4685,novel_mir1701,novel_mir348,novel_mir6,mmu-miR-484,novel_mir2586,novel_mir836,novel_mir4676,novel_mir2371	6mer	NA	-20.41	152	Acot4	GO:0005777,GO:0004778,GO:0005102,GO:0016290,GO:0052689,GO:0046459,GO:0032789,GO:0000038,GO:0006104,GO:0001676,GO:0032788,GO:0043649,	K01068|1|4.2e-232|808.5|rno:681337|acyl-coenzyme A thioesterase 1/2/4 [EC:3.1.2.2]	gi|269308227|ref|NP_599008.3|	6.03701e-102	acyl-coenzyme A thioesterase 4 [Mus musculus]
NM_008013.4	novel_mir4718,novel_mir20,novel_mir4993,novel_mir7,mmu-miR-6914-3p,novel_mir1068,novel_mir3742,novel_mir3479,novel_mir5738,novel_mir1911,novel_mir556,novel_mir1448,mmu-miR-423-5p,novel_mir5394,novel_mir429,novel_mir240,novel_mir3243,novel_mir5326,novel_mir2232,novel_mir1317,novel_mir4624,novel_mir2611,novel_mir2024,novel_mir4735,novel_mir2438,novel_mir2673,novel_mir1932,novel_mir1740,novel_mir160…	7mer-m8	NA	-24.32	158	Fgl2	GO:0070062,GO:0008233,GO:0019835,GO:0006508,GO:0007567,	K10955|1|2.3e-83|315.1|sasa:106573374|mucin-2!K10104|3|1.0e-54|219.9|nve:NEMVE_v1g90597|ficolin!K17341|4|1.0e-54|219.9|epa:110239347|hemicentin!K06252|5|1.7e-54|219.2|spis:111331328|tenascin	gi|31542814|ref|NP_032039.2|	0	fibroleukin precursor [Mus musculus]
NM_053161.2	novel_mir4278,novel_mir5770,novel_mir5536,novel_mir4479,novel_mir1940,novel_mir2587,novel_mir1368,novel_mir997,novel_mir912,novel_mir369,novel_mir56,novel_mir1809,novel_mir348,novel_mir4462,mmu-miR-7682-3p,novel_mir502,novel_mir2753,novel_mir2394,novel_mir1345,novel_mir5337,novel_mir3908,novel_mir917,novel_mir4970,novel_mir873,novel_mir329,novel_mir4403,novel_mir1544,novel_mir519,novel_mir4673,no…	7mer-m8	NA	-23.82	146	Mrpl27	GO:0005762,GO:0003735,GO:0006412,	K02899|1|7.7e-80|301.2|mmu:94064|large subunit ribosomal protein L27	gi|148683996|gb|EDL15943.1|	5.61418e-72	mitochondrial ribosomal protein L27, isoform CRA_d [Mus musculus]
NM_021406.5	novel_mir3634,novel_mir3878,novel_mir2646,novel_mir4396,novel_mir2150,novel_mir310,novel_mir1592,novel_mir1235,novel_mir435,novel_mir347,novel_mir953,novel_mir4019,novel_mir4905,novel_mir1940,novel_mir294,novel_mir191,novel_mir3070,mmu-miR-5114,novel_mir5065,novel_mir908,novel_mir615,novel_mir2915,novel_mir912,novel_mir2370,novel_mir1461,mmu-miR-674-5p,novel_mir4103,novel_mir297,novel_mir4216,nov…	6mer	NA	-20.45	152	Trem1	GO:0016021,GO:0097110,GO:0070945,GO:0098792,GO:0002374,GO:0050755,GO:0072672,GO:0098779,GO:0002230,GO:0030593,	K14362|1|1.4e-126|458.4|mmu:58217|triggering receptor expressed on myeloid cells 1	gi|109731560|gb|AAI11876.1|	3.25934e-70	Trem1 protein [Mus musculus]
NM_011150.2	novel_mir458,mmu-miR-671-5p,novel_mir2614,novel_mir3497,novel_mir3800,novel_mir112,novel_mir2852,novel_mir3745,novel_mir577,novel_mir1877,novel_mir1445,novel_mir3556,novel_mir1194,novel_mir1989,novel_mir832,novel_mir4303,novel_mir3739,novel_mir5166,novel_mir484,novel_mir1020,novel_mir2396,novel_mir726,novel_mir1204,novel_mir955,novel_mir5742,novel_mir3914,novel_mir138,novel_mir4744,novel_mir729,n…	7mer-m8	NA	-20.89	147	Lgals3bp	GO:0016020,GO:0072562,GO:0070062,GO:0005578,GO:0005044,GO:0005515,GO:0007155,	K17300|1|6.1e-302|1040.4|rno:245955|galectin-3-binding protein	gi|6755144|ref|NP_035280.1|	0	galectin-3-binding protein precursor [Mus musculus]
XM_006539559.2	novel_mir1010,novel_mir4630,novel_mir782,novel_mir867,novel_mir1373,novel_mir918,novel_mir3465,novel_mir1322,novel_mir1924,novel_mir5600,novel_mir902,novel_mir2871,novel_mir4181,novel_mir4574,novel_mir3521,novel_mir1959,novel_mir1276,novel_mir4738,novel_mir416,novel_mir143,mmu-miR-338-3p,novel_mir979,novel_mir3976,novel_mir4479,novel_mir3119,novel_mir4620,novel_mir4399,novel_mir1691,novel_mir783,…	6mer	NA	-21.91	156	Hnrnpl	GO:0005654,GO:0016020,GO:0035770,GO:0005829,GO:0045120,GO:0048471,GO:0070062,GO:0005515,GO:0097157,GO:0000166,GO:0003730,GO:0044212,GO:1990715,GO:0034198,GO:0048025,GO:0000381,GO:1902416,GO:0045727,	K13159|1|0.0e+00|1107.8|csab:103234642|heterogeneous nuclear ribonucleoprotein L	gi|183980004|ref|NP_796275.3|	0	heterogeneous nuclear ribonucleoprotein L [Mus musculus]
NM_001163192.1	novel_mir3044,novel_mir41,novel_mir742,novel_mir2306,novel_mir1647,novel_mir1838,novel_mir1877,novel_mir1748,novel_mir1010,novel_mir279,novel_mir979,novel_mir1289,novel_mir689,novel_mir507,novel_mir521,novel_mir1170,novel_mir1025,novel_mir4634,novel_mir3263,novel_mir761,novel_mir117	6mer	NA	-55.39	319	Ly6g6f	GO:0016021,GO:0005886,	K20006|1|2.8e-175|618.6|mmu:433099|lymphocyte antigen 6 complex locus protein G6F	gi|253683539|ref|NP_001156664.1|	0	lymphocyte antigen 6 complex locus protein G6f precursor [Mus musculus]
NM_178280.3	novel_mir2517,mmu-miR-10b-5p,novel_mir5610,novel_mir5593,novel_mir1129,novel_mir1300,novel_mir3742,novel_mir410,novel_mir3987,novel_mir1799,novel_mir5164,novel_mir3679,novel_mir4508,novel_mir4372,novel_mir5852,novel_mir2129,novel_mir976,novel_mir5498,novel_mir3697,novel_mir5339,novel_mir918,novel_mir3304,novel_mir5596,novel_mir131,novel_mir3583,novel_mir3953,novel_mir5382,novel_mir2249,novel_mir3…	6mer	NA	-42.56	300	Sall3	-	K19871|1|0.0e+00|2523.4|mmu:20689|sal-like protein	gi|54144640|ref|NP_840064.2|	0	sal-like protein 3 [Mus musculus]
NM_013561.2	novel_mir4746,novel_mir857,novel_mir795,novel_mir1237,novel_mir5104,novel_mir2899,novel_mir880,novel_mir4361,novel_mir440,novel_mir4045,novel_mir1475,novel_mir275,novel_mir3340,novel_mir2654,novel_mir2026,novel_mir1648,novel_mir6054,novel_mir556,novel_mir4261,novel_mir2060,novel_mir2997,novel_mir5997,novel_mir2258,novel_mir124,novel_mir2618,novel_mir1427,novel_mir558,novel_mir1820,novel_mir3068,n…	7mer-1a	NA	-20.43	146	Htr3a	GO:0030054,GO:0030424,GO:0045211,GO:0043025,GO:1904602,GO:0005737,GO:0015464,GO:0022850,GO:0004993,GO:0051378,GO:0007210,GO:0032414,	K04819|1|9.7e-289|996.5|mmu:15561|5-hydroxytryptamine receptor 3	gi|153792456|ref|NP_038589.2|	0	5-hydroxytryptamine receptor 3A isoform 1 precursor [Mus musculus]
XM_006519992.3	mmu-miR-7043-3p,mmu-miR-101a-5p,novel_mir182,novel_mir2189,novel_mir240,novel_mir2239,novel_mir1582,novel_mir423,novel_mir3163,novel_mir2091,novel_mir2722,novel_mir184,novel_mir3744,novel_mir5896,novel_mir1712,novel_mir2838,novel_mir131,novel_mir5761,novel_mir4667,novel_mir512,novel_mir2256,novel_mir4356,novel_mir815,novel_mir357,novel_mir3661,novel_mir409,novel_mir20,novel_mir4259,novel_mir397,n…	8mer-1a	NA	-29.54	155	Ttc33	-	K02433|1|1.0e-17|95.9|tsp:Tsp_08794|aspartyl-tRNA(Asn)/glutamyl-tRNA(Gln) amidotransferase subunit A [EC:6.3.5.6 6.3.5.7]!K09560|2|1.4e-06|58.9|soc:105198105|suppressor of tumorigenicity protein 13!K09553|5|5.2e-06|57.0|tsp:Tsp_03199|stress-induced-phosphoprotein 1	gi|21312920|ref|NP_080489.1|	0	tetratricopeptide repeat protein 33 [Mus musculus]
NM_009280.2	novel_mir1995,novel_mir4229,novel_mir3638,novel_mir5076,novel_mir940,novel_mir382,novel_mir3610,novel_mir5286,novel_mir5465,novel_mir3537,novel_mir4039,novel_mir2131,novel_mir4430,novel_mir1490,novel_mir2307,mmu-miR-221-5p,novel_mir632,novel_mir2192,novel_mir3954,novel_mir4090,novel_mir513,novel_mir604,novel_mir1696,novel_mir1567,novel_mir3707,novel_mir1835,novel_mir234,novel_mir1822,novel_mir131…	6mer	NA	-20.91	153	Ss18	GO:0071564,GO:0005881,GO:0030374,GO:0035556,GO:0045944,GO:0000902,GO:0000226,GO:0097150,GO:0048013,GO:0042493,	K15623|1|1.4e-264|916.8|mmu:268996|protein SSXT	gi|238624169|ref|NP_033306.2|	0	protein SSXT isoform 1 [Mus musculus]
NM_009527.3	mmu-miR-193b-5p,novel_mir2214,novel_mir3952,novel_mir3258,novel_mir2270,novel_mir1541,mmu-miR-741-3p,novel_mir3199,novel_mir2117,novel_mir241,novel_mir336,novel_mir5856,mmu-miR-449a-5p,novel_mir233,novel_mir5314,novel_mir1922,novel_mir1373,novel_mir1158,novel_mir1814,novel_mir199,novel_mir4192,mmu-miR-484,mmu-miR-8107,novel_mir386,novel_mir1435,novel_mir4298,mmu-miR-324-5p,novel_mir1811,novel_mir…	6mer	NA	-32.99	168	Wnt7a	GO:0009986,GO:0098793,GO:0005615,GO:0005578,GO:0005109,GO:0005125,GO:0048018,GO:0050768,GO:0021707,GO:0035659,GO:0048103,GO:0035567,GO:0035019,GO:0090263,GO:0030010,GO:0010595,GO:0002062,GO:0048864,GO:0061038,GO:0045944,GO:0071560,GO:0043589,GO:0042733,GO:1904891,GO:2000463,GO:0060066,GO:0014834,GO:0032355,GO:0009953,GO:0000578,GO:0045165,GO:0031133,GO:0001525,GO:0046330,GO:0043627,GO:0022009,GO:…	K00572|1|1.3e-212|744.2|mmu:22421|wingless-type MMTV integration site family, member 7	gi|31543960|ref|NP_033553.2|	0	protein Wnt-7a precursor [Mus musculus]
NM_009221.2	novel_mir234,novel_mir5500,novel_mir456,novel_mir3785,novel_mir3343,novel_mir2292,novel_mir460,novel_mir1975,novel_mir1423,novel_mir2706,novel_mir4387,novel_mir54,novel_mir4322,mmu-miR-423-5p,novel_mir2239,novel_mir2232,mmu-miR-7052-3p,mmu-miR-6961-5p,novel_mir4566,novel_mir2440,novel_mir1295,novel_mir1229,novel_mir3203,novel_mir1911,novel_mir896,novel_mir5459,novel_mir4800,novel_mir4169,novel_mi…	8mer-1a	NA	-24.75	151	Snca	GO:0030426,GO:0043195,GO:0031092,GO:0015629,GO:0005938,GO:0030054,GO:0005886,GO:0016234,GO:0005794,GO:0005739,GO:0005791,GO:0005829,GO:0005615,GO:0098794,GO:0048471,GO:0008021,GO:0005840,GO:0005640,GO:0048487,GO:0048156,GO:0016491,GO:0050544,GO:0042393,GO:0008198,GO:0019894,GO:0008270,GO:0043014,GO:0042802,GO:0005507,GO:0051219,GO:0008017,GO:0043027,GO:0005509,GO:0060961,GO:0019904,GO:0000287,GO:…	K04528|1|2.3e-72|276.9|mmu:20617|alpha-synuclein	gi|148666340|gb|EDK98756.1|	4.66143e-92	synuclein, alpha, isoform CRA_b, partial [Mus musculus]
XM_006530975.2	novel_mir1486,novel_mir6016,mmu-miR-15a-3p,novel_mir700,novel_mir4290,novel_mir3387,novel_mir1482,novel_mir132,novel_mir712,novel_mir1681,novel_mir1894,novel_mir3873,novel_mir2858,novel_mir1073,novel_mir4242,novel_mir5251,novel_mir1694,novel_mir2470,mmu-miR-145a-3p,novel_mir1339,novel_mir4706,novel_mir4345,novel_mir4442,novel_mir639,novel_mir3524,mmu-miR-193b-3p,novel_mir6001,novel_mir431,novel_m…	6mer	NA	-20.96	146	Def8	GO:0046872,GO:0035556,	K19330|1|1.6e-43|182.6|mpha:105839658|run domain Beclin-1 interacting and cysteine-rich containing protein	gi|359339029|ref|NP_001240712.1|	0	differentially expressed in FDCP 8 isoform 1 [Mus musculus]
NM_008216.3	novel_mir4525,novel_mir5492,novel_mir1308,novel_mir1167,novel_mir340,novel_mir5227,novel_mir5997,novel_mir5263,novel_mir3860,novel_mir5781,novel_mir696,novel_mir4431,novel_mir444,novel_mir5519,novel_mir3004,mmu-miR-30b-5p,novel_mir5784,novel_mir354,novel_mir4558,novel_mir5721,novel_mir2670,novel_mir702,novel_mir4925,novel_mir2548,novel_mir183,mmu-miR-362-3p,mmu-miR-669o-5p,novel_mir1105,novel_mir…	7mer-1a	NA	-51.18	306	Has2	GO:0005887,GO:0005737,GO:0050501,GO:1900625,GO:0010838,GO:0060349,GO:0036120,GO:0045226,GO:0036302,GO:0085029,GO:1900127,GO:0051549,GO:0014911,GO:1900026,GO:0090500,GO:0001570,	K00752|1|0.0e+00|1129.4|mmu:15117|hyaluronan synthase [EC:2.4.1.212]	gi|160358868|ref|NP_032242.3|	0	hyaluronan synthase 2 [Mus musculus]
NM_027854.1	novel_mir479,mmu-miR-6961-5p,novel_mir2490,novel_mir2147,novel_mir1342,novel_mir4954,novel_mir5519,novel_mir213,novel_mir4322,novel_mir1831,novel_mir498,novel_mir354,mmu-miR-93-5p,novel_mir826,novel_mir243,novel_mir1452,novel_mir969,novel_mir4411,novel_mir1263,novel_mir3416,novel_mir5594,novel_mir4717,novel_mir531,novel_mir5618,novel_mir5352,novel_mir1664,novel_mir3107,novel_mir1762,novel_mir1615…	8mer-1a	NA	-31.51	158	Tmem248	GO:0016021,	K20131|1|4.6e-177|626.3|cdk:105089697|Rab5 GDP/GTP exchange factor!K12662|4|2.6e-10|72.4|smm:Smp_169060|U4/U6 small nuclear ribonucleoprotein PRP4	gi|124487091|ref|NP_001074863.1|	0	transmembrane protein 248 [Mus musculus]
NM_026312.5	novel_mir5328,novel_mir6109,novel_mir3280,novel_mir4463,novel_mir5931,novel_mir1323,novel_mir2145,novel_mir5016,novel_mir3909,novel_mir4077,novel_mir1086,novel_mir2290,novel_mir282,novel_mir5666,novel_mir2754,novel_mir548,novel_mir4769,novel_mir4412,novel_mir2831,novel_mir3081,novel_mir1632,novel_mir3225,novel_mir4396,novel_mir5811	8mer-1a	NA	-22.88	166	Pbdc1	-	-	gi|569010616|ref|XP_006528332.1|	8.61218e-139	PREDICTED: protein PBDC1 isoform X5 [Mus musculus]
NM_013528.3	novel_mir5970,novel_mir905,novel_mir2876,novel_mir2555,novel_mir607,novel_mir622,novel_mir5640,novel_mir1472,novel_mir5854,novel_mir3771,novel_mir2526,mmu-miR-6418-3p,novel_mir183,novel_mir4489,novel_mir4615,mmu-miR-700-5p,novel_mir2912,novel_mir3991,novel_mir243,novel_mir1452,novel_mir3179,novel_mir3001,novel_mir5318,novel_mir3591,mmu-miR-362-3p,novel_mir1835,novel_mir3724,novel_mir2593,mmu-miR-…	7mer-1a	NA	-54.5	306	Gfpt1	GO:0070062,GO:0030246,GO:0016597,GO:0004360,GO:0006042,GO:0045719,GO:0006541,GO:0051289,GO:0032869,GO:0032922,GO:0009744,GO:0006048,GO:0006002,	K00820|1|0.0e+00|1362.1|mmu:14583|glucosamine---fructose-6-phosphate aminotransferase (isomerizing) [EC:2.6.1.16]	gi|7305085|ref|NP_038556.1|	0	glutamine--fructose-6-phosphate aminotransferase [isomerizing] 1 [Mus musculus]
NM_009613.3	novel_mir1072,novel_mir4322,mmu-miR-1983,novel_mir836,novel_mir5640,novel_mir1626,novel_mir1167,novel_mir340,novel_mir1875,novel_mir3139,novel_mir4331,novel_mir5595,novel_mir2358,novel_mir257,novel_mir6094,novel_mir2147,novel_mir4011,novel_mir4282,novel_mir1835,novel_mir243,novel_mir300,novel_mir76,novel_mir164,novel_mir1915,novel_mir1030,novel_mir702,novel_mir4228,novel_mir183,novel_mir1116,nove…	7mer-m8	NA	-20.71	152	Adam11	GO:0016021,GO:0004222,GO:0008270,GO:0005515,GO:0006508,	K16067|1|0.0e+00|1642.1|mmu:11488|disintegrin and metalloproteinase domain-containing protein 11 [EC:3.4.24.-]	gi|568971220|ref|XP_006532081.1|	0	PREDICTED: disintegrin and metalloproteinase domain-containing protein 11 isoform X5 [Mus musculus]
NM_013719.3	novel_mir816,novel_mir764,novel_mir1388,novel_mir4627,novel_mir6150,novel_mir2124,novel_mir2633,novel_mir5356,novel_mir1119,novel_mir970,novel_mir6068,novel_mir1402,novel_mir278,novel_mir1244,novel_mir1863,novel_mir975,novel_mir1464,novel_mir5839,novel_mir1928,novel_mir3858,novel_mir3233,mmu-miR-22-5p,novel_mir4023,mmu-miR-532-5p,novel_mir583,novel_mir917,novel_mir1424,novel_mir4194,novel_mir307,…	7mer-m8	NA	-24.17	163	Eif2ak4	-	K16196|1|0.0e+00|3287.3|mmu:27103|eukaryotic translation initiation factor 2-alpha kinase 4 [EC:2.7.11.1]	gi|295317391|ref|NP_001171277.1|	0	eIF-2-alpha kinase GCN2 isoform 2 [Mus musculus]
NM_146222.2	novel_mir880,novel_mir4004,novel_mir4337,novel_mir2546,novel_mir3742,novel_mir4511,novel_mir5673,novel_mir2060,novel_mir366,novel_mir4890,novel_mir5610,novel_mir2444,novel_mir1911,novel_mir4220,novel_mir1773,mmu-miR-7043-3p,novel_mir1542,novel_mir2143,novel_mir508,novel_mir2361,novel_mir4672,novel_mir582,novel_mir301,novel_mir1429,novel_mir3226,novel_mir2232,novel_mir618,novel_mir4014,novel_mir48…	7mer-m8	NA	-27.51	151	Msantd2	-	K06755|1|8.0e-10|70.1|acun:113488424|roundabout, axon guidance receptor 3!K09230|2|7.5e-08|63.5|pvt:110086460|SCAN domain-containing zinc finger protein!K17757|5|2.2e-07|62.0|hcq:109524678|ATP-dependent NAD(P)H-hydrate dehydratase [EC:4.2.1.93]	gi|42734476|ref|NP_666334.2|	0	myb/SANT-like DNA-binding domain-containing protein 2 [Mus musculus]
NM_025969.4	novel_mir4032,novel_mir2960,novel_mir4147,novel_mir2308,novel_mir79,novel_mir5100,novel_mir1911,novel_mir1105,novel_mir4398,novel_mir2040,novel_mir738,novel_mir2137,novel_mir3385,novel_mir312,novel_mir2522,novel_mir4507,novel_mir3846,novel_mir2942,novel_mir5630,novel_mir4403,novel_mir5638,mmu-miR-27a-3p,novel_mir3076,mmu-miR-27b-3p	6mer	NA	-22.03	164	Timm21	GO:0016021,GO:0005744,GO:0033617,GO:0030150,GO:0032981,	K17796|1|9.8e-138|494.2|mmu:67105|mitochondrial import inner membrane translocase subunit TIM21	gi|21313128|ref|NP_080245.1|	8.87391e-180	mitochondrial import inner membrane translocase subunit Tim21 [Mus musculus]
NM_029453.2	novel_mir1995,novel_mir5076,novel_mir416,novel_mir1730,novel_mir3742,novel_mir5673,novel_mir377,novel_mir366,novel_mir4205,novel_mir1961,novel_mir5352,novel_mir838,novel_mir516,novel_mir632,novel_mir3299,novel_mir5888,novel_mir4045,novel_mir5237,novel_mir3724,novel_mir1835,novel_mir3667,novel_mir2722,novel_mir1253,novel_mir2802,novel_mir1487,novel_mir1573,novel_mir4199,novel_mir428,novel_mir189,m…	6mer	NA	-21.46	158	Wdr64	-	K02988|1|4.1e-43|181.4|hmg:100211326|small subunit ribosomal protein S5!K21957|3|5.4e-11|74.7|ola:101172029|pseudokinase FAM20A!K10599|5|1.1e-06|60.5|loa:LOAG_04853|pre-mRNA-processing factor 19 [EC:2.3.2.27]	gi|568911227|ref|XP_006497086.1|	0	PREDICTED: WD repeat-containing protein 64 isoform X2 [Mus musculus]
NM_007530.3	novel_mir432,novel_mir4989,novel_mir1767,novel_mir4304,novel_mir1565,mmu-miR-429-3p,novel_mir1241,novel_mir1063,novel_mir722,novel_mir581,novel_mir4287,mmu-miR-503-5p,novel_mir33,novel_mir3859,novel_mir252,novel_mir603,novel_mir2383,novel_mir2137,novel_mir637,novel_mir3991,novel_mir295,novel_mir1962,novel_mir2184,novel_mir4389,mmu-miR-152-3p,novel_mir3912,novel_mir6059,novel_mir137,novel_mir5672,…	7mer-m8	NA	-20.01	160	Bcap29	GO:0016021,GO:0005783,GO:0001649,GO:0070973,GO:0006886,GO:0006888,GO:0006915,	K05545|1|1.1e-105|388.3|mcf:102116116|tRNA-dihydrouridine synthase 4 [EC:1.3.1.90]!K14009|3|1.6e-56|224.9|ptr:738935|B-cell receptor-associated protein 31	gi|148704963|gb|EDL36910.1|	1.44451e-172	B-cell receptor-associated protein 29, partial [Mus musculus]
NM_144798.6	novel_mir5127,novel_mir3085,novel_mir4259,novel_mir994,novel_mir4191,novel_mir1467,novel_mir1696,novel_mir2187,novel_mir4270,novel_mir410,novel_mir4049,novel_mir5153,novel_mir323,novel_mir3079,novel_mir5639,novel_mir4101,novel_mir5486,novel_mir4752,novel_mir2175,novel_mir395,novel_mir1764,novel_mir2189,novel_mir2801,novel_mir444,novel_mir197,novel_mir6094,novel_mir1050,novel_mir1004,novel_mir3976…	6mer	NA	-21.47	142	Slc30a6	GO:0016021,GO:0005739,GO:0005794,GO:0005385,GO:0006895,GO:0055085,GO:0061088,GO:0006829,GO:0010043,	K14693|1|5.3e-266|921.0|mmu:210148|solute carrier family 30 (zinc transporter), member 6	gi|537142600|gb|ERE68554.1|	0	zinc transporter 6 [Cricetulus griseus]
NM_053241.5	novel_mir5382,novel_mir3343,novel_mir141,novel_mir3179,novel_mir686,novel_mir5257,novel_mir2398,novel_mir1554,novel_mir2234,novel_mir2759,novel_mir979,novel_mir1003,novel_mir2490,novel_mir508,novel_mir742,mmu-miR-30b-5p,mmu-miR-423-5p,novel_mir4645,novel_mir4311,novel_mir4641,novel_mir5316,mmu-miR-17-3p,novel_mir5182,novel_mir4598,novel_mir3012,novel_mir5003,novel_mir2129,novel_mir5008,novel_mir4…	6mer	NA	-25.5	162	Cldn16	GO:0005923,GO:0005886,GO:0016021,GO:0042802,GO:0005198,GO:0016338,GO:0070633,GO:0051928,	K06087|1|9.7e-137|490.7|mmu:114141|claudin	gi|16716565|ref|NP_444471.1|	2.85192e-173	claudin-16 [Mus musculus]
NM_011464.2	novel_mir4663,novel_mir3530,novel_mir1094,novel_mir2064,novel_mir896,mmu-miR-204-3p,novel_mir3180,novel_mir5294,novel_mir463,novel_mir3714,novel_mir169,novel_mir144,novel_mir4738,novel_mir1125,novel_mir2887,novel_mir691,novel_mir1531,novel_mir3696,novel_mir4508,novel_mir5062,novel_mir5829,novel_mir4964,novel_mir269,novel_mir3903,novel_mir5127,novel_mir889,novel_mir456,novel_mir183,novel_mir4077,m…	7mer-1a	NA	-21.95	146	Spint2	GO:0005737,GO:0016021,GO:0005886,GO:0004867,GO:0008233,GO:0071711,GO:0007163,GO:0010951,GO:0071773,GO:0022408,GO:2000178,GO:0001843,GO:2000146,GO:0060672,	K15619|1|3.2e-28|130.6|rbb:108523426|Kunitz-type protease inhibitor 1	gi|33563278|ref|NP_035594.1|	0	kunitz-type protease inhibitor 2 isoform a precursor [Mus musculus]
NM_008175.4	novel_mir4295,novel_mir4831,novel_mir295,novel_mir1822,novel_mir91,novel_mir1512,novel_mir5650,novel_mir2530,novel_mir252,novel_mir1679,novel_mir691,novel_mir3469,novel_mir1556,mmu-miR-6971-3p,novel_mir221,novel_mir103,novel_mir973,novel_mir108,novel_mir250,novel_mir940,novel_mir4018,novel_mir1368,novel_mir2366,novel_mir5509,novel_mir4005,novel_mir491,novel_mir5634,novel_mir1508,novel_mir2379,nov…	6mer	NA	-21.16	152	Grn	-	K20636|1|5.5e-91|339.7|apla:101792718|Rho GTPase-activating protein 12/27	gi|224967126|ref|NP_032201.2|	0	granulins precursor [Mus musculus]
NM_145828.3	mmu-miR-18b-5p,novel_mir4908,novel_mir1873,novel_mir1572,novel_mir3887,novel_mir1276,novel_mir669,novel_mir818,novel_mir1206,novel_mir298,novel_mir1987,novel_mir1541,novel_mir4936,novel_mir734,novel_mir749,novel_mir2426,novel_mir2408,mmu-miR-484,novel_mir1814,novel_mir4177,novel_mir4777,novel_mir1345,novel_mir3429,novel_mir4763,novel_mir233,novel_mir5285,novel_mir5856,novel_mir136,mmu-miR-7682-3p…	6mer	NA	-26.46	161	Xylt2	GO:0016021,GO:0000139,GO:0005789,GO:0030158,GO:0008375,GO:0015012,GO:0030210,GO:0030206,	K00771|1|0.0e+00|1734.9|rno:64134|protein xylosyltransferase [EC:2.4.2.26]	gi|165932343|ref|NP_665827.2|	0	xylosyltransferase 2 [Mus musculus]
NM_010921.3	novel_mir469,novel_mir3172,novel_mir3688,novel_mir2828,novel_mir2838,novel_mir4147,novel_mir866,mmu-miR-30c-1-3p,novel_mir140,novel_mir1107,novel_mir4071,novel_mir760,novel_mir616,mmu-miR-101a-5p,novel_mir2476,novel_mir460,novel_mir2303,novel_mir3776,novel_mir6034,novel_mir926,novel_mir4249,novel_mir5997,novel_mir3,novel_mir2397,novel_mir1538,novel_mir524,novel_mir1266,novel_mir1492,novel_mir65,n…	7mer-m8	NA	-22.81	140	Nkx3-1	GO:0005634,GO:0008134,GO:0008656,GO:0004882,GO:0097162,GO:0043621,GO:0000983,GO:0001047,GO:0000976,GO:0030284,GO:0030295,GO:0030331,GO:0042826,GO:0060664,GO:0008284,GO:0030521,GO:0007507,GO:0048754,GO:2000836,GO:0001656,GO:2001244,GO:0032147,GO:0014068,GO:0045892,GO:0060770,GO:0033574,GO:0071899,GO:0060037,GO:0045930,GO:0071456,GO:0071356,GO:0051781,GO:0071850,GO:0035260,GO:0045944,GO:0006919,GO:…	K09348|1|1.4e-137|495.0|mmu:18095|homeobox protein Nkx-3.1	gi|7110673|ref|NP_035051.1|	6.27033e-175	homeobox protein Nkx-3.1 [Mus musculus]
NM_007783.3	novel_mir4697,novel_mir4236,novel_mir1920,novel_mir3695,novel_mir4630,novel_mir705,novel_mir711,novel_mir1730,novel_mir2734,novel_mir4959,novel_mir117,novel_mir945,novel_mir761,novel_mir3034,novel_mir4018,novel_mir773,novel_mir5459,novel_mir573,novel_mir3567,novel_mir742,novel_mir460,novel_mir2563,novel_mir6034,novel_mir788,novel_mir4459,novel_mir1053,novel_mir3667,novel_mir3744,novel_mir2540,nov…	8mer-1a	NA	-22.11	148	Csk	GO:0045121,GO:0031234,GO:0005737,GO:0070062,GO:0005911,GO:0005102,GO:0046872,GO:0034236,GO:0070064,GO:0042802,GO:0005524,GO:0019903,GO:0004715,GO:0045779,GO:0042997,GO:0038083,GO:0033673,GO:0007169,GO:0043406,GO:0002250,GO:0050863,GO:0016477,GO:0070373,GO:0045087,GO:0050765,GO:0034332,GO:0030154,GO:0060368,GO:0008285,GO:0007417,GO:0071375,GO:0032715,GO:0010989,	K05728|1|1.9e-268|929.5|aml:100472520|c-src tyrosine kinase [EC:2.7.10.2]	gi|31560712|ref|NP_031809.2|	0	tyrosine-protein kinase CSK [Mus musculus]
NM_001033288.3	novel_mir680,novel_mir2491,novel_mir1920,novel_mir1715,novel_mir1409,novel_mir5379,novel_mir186,novel_mir5936,mmu-miR-150-5p,novel_mir86,novel_mir2744,novel_mir823,novel_mir118,mmu-miR-532-3p,novel_mir3915,novel_mir2310,novel_mir3416,novel_mir1127,novel_mir5173,novel_mir49,novel_mir426,novel_mir5164,novel_mir3097,novel_mir3671,novel_mir1799,novel_mir2979,novel_mir4574,novel_mir5116,novel_mir507,n…	8mer-1a	NA	-25.55	151	Sbspon	GO:0005578,GO:0030247,GO:0005044,GO:0006955,GO:0006898,	-	gi|148682388|gb|EDL14335.1|	0	mCG51650, partial [Mus musculus]
NM_009104.2	novel_mir6132,mmu-let-7d-5p,mmu-let-7f-5p,novel_mir5597,novel_mir3838,novel_mir797,novel_mir911,novel_mir914,novel_mir1479,novel_mir5246,novel_mir5376,novel_mir3347,novel_mir984,mmu-let-7f-2-3p,novel_mir3030,novel_mir5630,novel_mir6160,novel_mir1535,novel_mir2936,novel_mir2109,novel_mir3199,novel_mir3355,novel_mir583,novel_mir706,novel_mir2115,mmu-miR-466i-5p,novel_mir2766,novel_mir1341,novel_mir…	7mer-m8	NA	-21.17	152	Rrm2	GO:0005971,GO:0005635,GO:0046872,GO:0005515,GO:0004748,GO:0000278,GO:0055114,GO:0009263,GO:0006260,GO:0006206,GO:0009186,GO:0051290,GO:0008284,	K10808|1|1.8e-224|783.1|mmu:20135|ribonucleoside-diphosphate reductase subunit M2 [EC:1.17.4.1]	gi|7106399|ref|NP_033130.1|	0	ribonucleoside-diphosphate reductase subunit M2 [Mus musculus]
NM_029572.2	novel_mir2773,novel_mir137,novel_mir6077,novel_mir789,novel_mir4111,novel_mir2613,novel_mir2611,novel_mir3517,novel_mir4245,novel_mir5332,novel_mir809,novel_mir2722,novel_mir2840,novel_mir197,novel_mir5806,novel_mir2894,novel_mir1506,novel_mir420,novel_mir979,novel_mir4856,novel_mir4918,novel_mir3951,novel_mir1943,novel_mir429,novel_mir709,novel_mir1542,novel_mir5968,novel_mir4890,novel_mir4663,n…	7mer-m8	NA	-22.39	143	Erp44	GO:0005789,GO:0009986,GO:0005788,GO:0005793,GO:0070062,GO:0005515,GO:0003756,GO:0006457,GO:0034976,GO:0009100,GO:0045454,GO:0006986,	K17264|1|4.4e-238|828.6|mmu:76299|endoplasmic reticulum resident protein 44	gi|19072792|ref|NP_083848.1|	0	endoplasmic reticulum resident protein 44 precursor [Mus musculus]
XM_011238482.2	novel_mir1835,novel_mir3832,novel_mir164,novel_mir4995,novel_mir2119,novel_mir2670,novel_mir5519,mmu-miR-1983,novel_mir1626,novel_mir617,novel_mir2127,novel_mir324,novel_mir214,novel_mir4554,novel_mir1875,novel_mir3139,novel_mir5595,novel_mir2358,novel_mir2147,novel_mir2973,novel_mir3599,novel_mir2048,novel_mir1995,novel_mir1565,novel_mir1641,novel_mir1852,novel_mir1377,novel_mir2826,novel_mir477…	7mer-1a	NA	-23.78	149	Kansl3	GO:0005730,GO:0000123,GO:0046972,GO:0043995,GO:0043996,GO:0043981,GO:0043982,GO:0043984,	K16719|1|0.0e+00|1634.8|mmu:226976|regulatory NSL complex subunit 3	gi|887239940|ref|NP_001297442.1|	0	KAT8 regulatory NSL complex subunit 3 isoform 1 [Mus musculus]
NM_009794.3	novel_mir2161,novel_mir4189,mmu-miR-24-3p,novel_mir3325,novel_mir278,novel_mir6098,novel_mir2710,novel_mir136,novel_mir1287,novel_mir2269,novel_mir851,novel_mir4979,novel_mir6107,novel_mir797,novel_mir3005,novel_mir1662,novel_mir640,novel_mir4520,novel_mir482,novel_mir650,novel_mir4837,novel_mir4958,novel_mir5614,novel_mir436,mmu-miR-338-3p,novel_mir142,novel_mir662,novel_mir2541,novel_mir1402,no…	6mer	NA	-20.68	150	Capn2	GO:0005925,GO:0045121,GO:0000785,GO:0031143,GO:0005764,GO:0005794,GO:0005829,GO:0030425,GO:0097038,GO:0070062,GO:0005886,GO:0005634,GO:0005509,GO:0046982,GO:0008092,GO:0004198,GO:0051603,GO:0051493,GO:0001824,GO:0007520,GO:0016540,GO:0071230,	K03853|1|0.0e+00|1436.0|mmu:12334|calpain-2 [EC:3.4.22.53]	gi|157951598|ref|NP_033924.2|	0	calpain-2 catalytic subunit [Mus musculus]
NM_175198.4	mmu-miR-6991-3p,novel_mir357,novel_mir2443,novel_mir1467,novel_mir118,novel_mir823,novel_mir2386,novel_mir1068,novel_mir3987,novel_mir4989,novel_mir1129,novel_mir3742,novel_mir5819,novel_mir2474,novel_mir3797,novel_mir1229,novel_mir3312,novel_mir244,novel_mir4202,novel_mir1542,novel_mir3951,novel_mir1506,novel_mir882,novel_mir2207,novel_mir3544,novel_mir2722,novel_mir189,novel_mir428,novel_mir129…	7mer-m8	NA	-70.44	456	Prox2	GO:0005634,GO:0003677,GO:0001078,GO:0045944,GO:0055007,GO:0000122,GO:0030182,	K20212|1|0.0e+00|1211.1|mmu:73422|prospero homeobox 2	gi|30424822|ref|NP_780407.1|	0	prospero homeobox protein 2 [Mus musculus]
NM_172546.2	novel_mir4634,novel_mir4159,novel_mir2156,novel_mir892,novel_mir2298,novel_mir946,novel_mir5626,mmu-miR-6948-3p,novel_mir435,novel_mir194,novel_mir5555,novel_mir5949,novel_mir646,novel_mir542,novel_mir894,novel_mir580,novel_mir5262,novel_mir1019,novel_mir3589,novel_mir687,novel_mir634,novel_mir2644,novel_mir1894,novel_mir1073,novel_mir6011,mmu-miR-128-1-5p,novel_mir5251,novel_mir1339,novel_mir185…	8mer-1a	NA	-22.61	141	Cnksr3	GO:0005737,GO:0016020,GO:0033137,GO:2000651,GO:0070373,	K17536|1|1.1e-204|718.0|lcf:108897960|connector enhancer of kinase suppressor of Ras 2	gi|755532674|ref|XP_011241381.1|	0	PREDICTED: connector enhancer of kinase suppressor of ras 3 isoform X1 [Mus musculus]
NM_013871.3	novel_mir5477,novel_mir2099,novel_mir5748,novel_mir5076,novel_mir3671,novel_mir5107,novel_mir5116,novel_mir6012,novel_mir3657,novel_mir862,novel_mir761,novel_mir857,novel_mir1664,novel_mir5861,mmu-miR-7b-5p,novel_mir819,novel_mir3416,novel_mir4411,novel_mir813,novel_mir5882,novel_mir3920,novel_mir3582,novel_mir3179,novel_mir4948,novel_mir3591,novel_mir3724,novel_mir3068,novel_mir3717,novel_mir354…	7mer-1a	NA	-24.91	156	Mapk12	GO:0005739,GO:0005654,GO:0004707,GO:0005524,GO:0005515,GO:0000287,GO:0018105,GO:0006355,GO:0045445,GO:0045786,GO:0000165,	K04441|1|6.9e-201|704.5|fca:111556320|p38 MAP kinase [EC:2.7.11.24]	gi|568992628|ref|XP_006521121.1|	0	PREDICTED: mitogen-activated protein kinase 12 isoform X1 [Mus musculus]
NM_172406.3	novel_mir5084,novel_mir745,novel_mir5509,novel_mir1568,novel_mir2495,mmu-miR-330-3p,novel_mir26,novel_mir2076,novel_mir4476,novel_mir975,novel_mir1863,novel_mir3005,novel_mir5091,novel_mir883,novel_mir5811,novel_mir1149,novel_mir2665,novel_mir3358,novel_mir3494,mmu-miR-3473b,novel_mir3284,novel_mir2079,novel_mir2305,novel_mir3251,novel_mir4188,novel_mir59,mmu-miR-3072-3p,novel_mir788,novel_mir230…	7mer-m8	NA	-57.58	298	Trak2	GO:0005739,GO:0005634,GO:0005886,GO:0050811,GO:0019899,GO:0006357,GO:0006605,GO:0006493,	K15374|1|0.0e+00|1800.4|mmu:70827|trafficking kinesin-binding protein 2	gi|40254203|ref|NP_765994.2|	0	trafficking kinesin-binding protein 2 [Mus musculus]
NM_001291058.1	novel_mir4918,novel_mir3139,novel_mir435,novel_mir3698,novel_mir2287,novel_mir636,novel_mir3326,novel_mir4797,novel_mir5356,novel_mir4902,novel_mir967,mmu-miR-1197-3p,novel_mir4634,novel_mir183,novel_mir1878,novel_mir2932,novel_mir3929,novel_mir4804,novel_mir6133,novel_mir4725,novel_mir1545,novel_mir1516,novel_mir4356,novel_mir4393,novel_mir680,novel_mir5426,novel_mir3399,novel_mir470,novel_mir57…	7mer-m8	NA	-20.33	147	Cd68	GO:0016021,GO:0005764,GO:0005768,GO:0005886,GO:0071310,	K06501|1|2.5e-191|672.2|mmu:12514|CD68 antigen	gi|597508192|ref|NP_001277987.1|	0	macrosialin precursor [Mus musculus]
XM_006497233.2	novel_mir5294,novel_mir4749,novel_mir4320,novel_mir474,novel_mir4223,novel_mir1860,novel_mir468,novel_mir109,novel_mir5214,novel_mir1600,novel_mir1670,novel_mir690,novel_mir4201,novel_mir5619,novel_mir2439,novel_mir2560,novel_mir1150,novel_mir2215,novel_mir503,novel_mir186,novel_mir4376,novel_mir311,novel_mir5399,novel_mir1312,novel_mir121,mmu-miR-6991-3p,novel_mir1715,novel_mir3655,novel_mir134,…	7mer-m8	NA	-21.25	152	Lamb3	GO:0005610,GO:0032403,GO:0007155,GO:0035987,GO:0050873,	K06244|1|0.0e+00|2276.1|rno:305078|laminin, beta 3	gi|113865981|ref|NP_032510.2|	0	laminin subunit beta-3 precursor [Mus musculus]
NM_029686.4	novel_mir4058,novel_mir959,novel_mir5596,mmu-miR-199b-5p,novel_mir1245,novel_mir2538,novel_mir2992,novel_mir2337,novel_mir1050,novel_mir5995,novel_mir558,novel_mir1429,novel_mir3682,novel_mir582,novel_mir384,novel_mir508,novel_mir4027,novel_mir429,novel_mir3241,novel_mir211,novel_mir1261,novel_mir971,novel_mir5819,novel_mir4730,mmu-miR-7051-5p,novel_mir410,novel_mir1670,novel_mir4304,novel_mir107…	7mer-1a	NA	-22.42	142	Pkd1l2	GO:0016021,GO:0005262,GO:0001965,GO:0030246,GO:0005509,GO:0050982,	K04988|1|0.0e+00|4189.8|cge:100760644|polycystin 1L2	gi|294862233|ref|NP_083962.4|	0	polycystic kidney disease protein 1-like 2 precursor [Mus musculus]
NM_008559.2	novel_mir1715,novel_mir4746,novel_mir1794,mmu-miR-214-3p,novel_mir4589,novel_mir3872,novel_mir123,novel_mir7,novel_mir807,novel_mir5008,novel_mir2442,novel_mir503,novel_mir4376,novel_mir5706,novel_mir5316,novel_mir5173,novel_mir2082,mmu-miR-149-5p,novel_mir4477,novel_mir1240,novel_mir2175,novel_mir2737,novel_mir4536,novel_mir4564,novel_mir4247,novel_mir3936,novel_mir4588,novel_mir5080,novel_mir40…	7mer-m8	NA	-48.6	311	Mc1r	GO:0016021,GO:0005886,GO:0031625,GO:0042562,GO:0004980,GO:0007186,GO:0042438,GO:0043473,GO:0030819,GO:2000253,GO:0070914,GO:0032720,GO:0010739,GO:0051897,GO:0019233,GO:0045944,GO:0090037,	K04199|1|1.5e-175|621.3|mmu:17199|melanocortin 1 receptor!K07375|5|5.0e-139|500.0|cfr:102511248|tubulin beta	gi|124339841|ref|NP_032585.2|	0	melanocyte-stimulating hormone receptor [Mus musculus]
NM_028369.3	novel_mir2915,novel_mir1246,novel_mir4500,novel_mir369,novel_mir3447,novel_mir763,novel_mir1287,novel_mir2994,novel_mir2040,novel_mir758,novel_mir5916,novel_mir3490,novel_mir25,novel_mir1157,novel_mir679,novel_mir146,novel_mir5634,mmu-miR-135b-5p,novel_mir4212,novel_mir997,novel_mir2703,novel_mir3384,novel_mir4154,novel_mir433,novel_mir2880,novel_mir1164,novel_mir3323,novel_mir172,novel_mir84,nov…	7mer-m8	NA	-69.58	332	Mon1a	GO:0012505,GO:0006879,GO:0016192,GO:0009306,	K20195|1|0.0e+00|1100.5|mmu:72825|vacuolar fusion protein MON1	gi|21312179|ref|NP_082645.1|	0	vacuolar fusion protein MON1 homolog A [Mus musculus]
NM_053253.3	novel_mir650,novel_mir3883,novel_mir483,novel_mir5749,novel_mir5270,mmu-miR-346-5p,novel_mir294,novel_mir4854,mmu-miR-339-5p,novel_mir1495,novel_mir1488,novel_mir4565,novel_mir2370,novel_mir3680,novel_mir5333,novel_mir1304,novel_mir5886,mmu-miR-1264-5p,novel_mir808,novel_mir1701,novel_mir613,novel_mir980,novel_mir4614,novel_mir87,novel_mir2806,novel_mir5420,novel_mir663,novel_mir4864,novel_mir225…	6mer	NA	-21.72	149	Zmynd10	GO:0034451,GO:0046872,GO:0036159,GO:0036158,GO:0044458,	K20405|1|1.3e-153|547.4|nni:104008748|nitrogen permease regulator 2-like protein!K17656|2|7.1e-06|56.6|mze:101480763|mitochondrial splicing suppressor protein 51	gi|31982595|ref|NP_444483.2|	0	zinc finger MYND domain-containing protein 10 [Mus musculus]
NM_008258.1	novel_mir1001,novel_mir3883,novel_mir1591,novel_mir4796,novel_mir1702,novel_mir1907,novel_mir4958,novel_mir277,novel_mir6150,novel_mir5509,novel_mir1488,novel_mir453,novel_mir1495,novel_mir3923,mmu-miR-92b-5p,novel_mir1690,novel_mir1368,novel_mir5666,novel_mir343,novel_mir657,novel_mir4196,novel_mir3138,novel_mir5789,novel_mir1037,novel_mir1338,novel_mir2360,novel_mir2782,novel_mir438,novel_mir12…	7mer-m8	NA	-22.73	162	Hn1	GO:0005730,GO:0031965,	-	gi|6680237|ref|NP_032284.1|	5.6965e-106	hematological and neurological expressed 1 protein [Mus musculus]
NM_175087.4	novel_mir2365,novel_mir2145,novel_mir729,novel_mir4990,novel_mir455,novel_mir4689,novel_mir201,novel_mir3190,novel_mir4241,mmu-miR-7024-5p,novel_mir4303,novel_mir2396,novel_mir6011,novel_mir1073,novel_mir1894,novel_mir4804,novel_mir4183,novel_mir1877,novel_mir4725,novel_mir659,novel_mir5503,novel_mir1194,novel_mir2163,novel_mir664,novel_mir592,novel_mir1649,novel_mir5337,novel_mir3497,novel_mir43…	6mer	NA	-165.65	1057	Aqp6	GO:0030658,GO:0005887,GO:0016324,GO:0005253,GO:0015254,GO:0015250,GO:0015112,GO:0042476,GO:0009992,GO:0015706,GO:0006833,GO:0015793,GO:0098656,	K09868|1|1.4e-162|577.4|mmu:11831|aquaporin-6	gi|568991170|ref|XP_006520413.1|	5.45553e-164	PREDICTED: aquaporin-6 isoform X1 [Mus musculus]
NM_025812.2	novel_mir435,novel_mir1812,mmu-miR-486a-3p,novel_mir2859,novel_mir2946,novel_mir5376,novel_mir310,mmu-miR-6948-3p,novel_mir1669,novel_mir646,novel_mir3400,novel_mir3159,novel_mir763,novel_mir4363,novel_mir1191,novel_mir2915,novel_mir908,novel_mir946,novel_mir297,mmu-miR-9-5p,novel_mir5584,mmu-miR-6933-5p,mmu-miR-877-3p,novel_mir2730,novel_mir1473,mmu-miR-211-5p,novel_mir3332,novel_mir3604,novel_m…	6mer	NA	-72.28	457	Hmg20a	-	K17538|1|4.7e-118|430.3|tng:GSTEN00016101G001|pseudopodium-enriched atypical kinase 1 [EC:2.7.10.2]!K09272|2|2.7e-12|79.0|salp:111965747|structure-specific recognition protein 1!K10802|5|1.0e-11|77.0|der:6550554|high mobility group protein B1	-	-	-
XM_006514801.3	novel_mir1626,novel_mir240,novel_mir598,novel_mir5272,novel_mir1252,novel_mir2905,novel_mir1278,novel_mir4292,novel_mir913,novel_mir459,novel_mir1044,novel_mir340,novel_mir4331,mmu-miR-7052-3p,novel_mir4719,novel_mir5158,novel_mir5283,novel_mir1364,novel_mir719,novel_mir4461,novel_mir183,novel_mir3673,novel_mir3255,novel_mir1270,novel_mir4144,novel_mir3011,novel_mir3733,novel_mir20,novel_mir2547,…	7mer-m8	NA	-28.95	158	Vrk2	-	K08816|1|5.9e-302|1040.0|mmu:69922|vaccinia related kinase [EC:2.7.11.1]	gi|356995837|ref|NP_001239376.1|	0	serine/threonine-protein kinase VRK2 isoform 2 [Mus musculus]
NM_013632.4	novel_mir3358,novel_mir3843,novel_mir5070,novel_mir2394,novel_mir4155,novel_mir1373,novel_mir1922,novel_mir577,mmu-miR-6933-5p,novel_mir2694,novel_mir4402,novel_mir4908,novel_mir1378,novel_mir2447,novel_mir3521,novel_mir3533,novel_mir1440,novel_mir1752,mmu-miR-188-5p,novel_mir4754,novel_mir5858,novel_mir3130,novel_mir4285,novel_mir3542,novel_mir3384,novel_mir4424,novel_mir3562,mmu-miR-140-3p,nove…	7mer-1a	NA	-20.81	151	Pnp	GO:0005856,GO:0005829,GO:0070062,GO:0005634,GO:0001882,GO:0008144,GO:0004731,GO:0042301,GO:0002060,GO:0006183,GO:0006161,GO:0010332,GO:0045739,GO:0043101,GO:0046115,GO:0034418,GO:0001916,GO:0006148,GO:0006149,GO:0008637,GO:0045579,GO:0046638,GO:0008630,GO:0070233,GO:0046070,GO:0042102,	K03783|1|3.4e-154|550.1|cge:100757729|purine-nucleoside phosphorylase [EC:2.4.2.1]	gi|7305395|ref|NP_038660.1|	0	purine nucleoside phosphorylase [Mus musculus]
NM_025530.3	novel_mir5924,novel_mir5878,novel_mir2034,novel_mir5749,novel_mir4498,novel_mir516,novel_mir3697,novel_mir3029,novel_mir2118,novel_mir1523,novel_mir2433,novel_mir5375,novel_mir3348,novel_mir3053	8mer-1a	NA	-20.76	146	Cutc	GO:0005737,GO:0005730,GO:0005507,GO:0051262,GO:0055070,	K06201|1|5.5e-141|505.0|mmu:66388|copper homeostasis protein	gi|165932339|ref|NP_079806.2|	0	copper homeostasis protein cutC homolog isoform 2 [Mus musculus]
NM_178242.2	novel_mir108,novel_mir210,novel_mir3763,novel_mir3511,novel_mir3848,novel_mir722,novel_mir169,novel_mir3664,novel_mir252,novel_mir4697,novel_mir2307,novel_mir5426,novel_mir853,mmu-miR-1306-3p,novel_mir3695,mmu-miR-6971-3p,novel_mir4361,novel_mir513,novel_mir3646,novel_mir150,novel_mir3667,novel_mir3744,novel_mir3473,novel_mir3656,novel_mir2154,novel_mir2548,novel_mir4585,novel_mir561,novel_mir696…	7mer-m8	NA	-113.88	648	Tnrc18	GO:0031965,GO:0005739,GO:0005677,GO:0000785,GO:0003682,GO:0000976,GO:0031507,GO:0006342,	K16628|1|3.2e-13|82.8|lak:106154943|collagen, type VII, alpha!K04727|2|7.4e-10|71.6|phyp:113531486|apoptosis-inducing factor 1 [EC:1.-.-.-]	gi|148687140|gb|EDL19087.1|	0	zinc finger protein 469, isoform CRA_c [Mus musculus]
NM_008445.2	novel_mir3728,novel_mir546,novel_mir5681,novel_mir59,novel_mir3251,novel_mir1390,novel_mir90,novel_mir433,novel_mir6160,novel_mir1128,novel_mir526,mmu-miR-1981-5p,novel_mir1424,novel_mir365,novel_mir4850,mmu-miR-3473b,novel_mir5811,novel_mir267,novel_mir4783,novel_mir851,novel_mir1113,novel_mir883,novel_mir6033,novel_mir278,novel_mir1863,novel_mir5509,novel_mir1960,novel_mir5131,novel_mir4796,nov…	6mer	NA	-24.09	152	Kif3c	GO:0016020,GO:0030426,GO:0035371,GO:0030425,GO:0043025,GO:0071598,GO:0030424,GO:0008021,GO:0005871,GO:0019894,GO:0003777,GO:0008017,GO:0016887,GO:0005524,GO:0010976,GO:0072384,	K20197|1|0.0e+00|1565.8|mmu:16570|kinesin family member 3C	gi|84781817|ref|NP_032471.2|	0	kinesin-like protein KIF3C [Mus musculus]
NM_016768.2	novel_mir5461,novel_mir491,novel_mir1489,novel_mir1175,novel_mir422,novel_mir3386,novel_mir764,novel_mir276,novel_mir1844,novel_mir1891,novel_mir6150,novel_mir5325,novel_mir66,mmu-miR-7058-5p,novel_mir2441,novel_mir602,novel_mir1037,novel_mir5210,novel_mir3701,novel_mir1863,novel_mir3393,novel_mir2621,novel_mir4599,mmu-let-7d-5p,novel_mir1113,novel_mir2123,mmu-let-7i-5p,novel_mir635,novel_mir5807…	6mer	NA	-24.21	148	Pbx3	GO:0005667,GO:0005634,GO:0000980,GO:0005515,GO:0001205,GO:0008344,GO:0045944,GO:0021516,GO:0002087,GO:0048666,	K15610|1|8.4e-251|870.9|rno:311876|pre-B-cell leukemia transcription factor 3	gi|625215450|ref|XP_003509465.2|	0	PREDICTED: pre-B-cell leukemia transcription factor 3 isoform X1 [Cricetulus griseus]
NM_178628.5	mmu-miR-1981-5p,novel_mir917,novel_mir3523,novel_mir4096,novel_mir329,mmu-miR-320-3p,novel_mir3915,novel_mir4381,novel_mir233,novel_mir663,novel_mir1679,mmu-miR-7689-3p,novel_mir1959,novel_mir3652,novel_mir5173,novel_mir2780,novel_mir3714,novel_mir5738,novel_mir433,novel_mir470,novel_mir4773,novel_mir1889,novel_mir5630,novel_mir1940,novel_mir2792,novel_mir3633,novel_mir4391,novel_mir1368,novel_mi…	8mer-1a	NA	-20.1	151	Atl1	GO:0016021,GO:0030424,GO:0000139,GO:0005789,GO:0000137,GO:0042802,GO:0003924,GO:0005525,GO:0007029,GO:0051260,GO:0007409,	K17339|1|0.0e+00|1122.1|mmu:73991|atlastin [EC:3.6.5.-]	gi|30519971|ref|NP_848743.1|	0	atlastin-1 [Mus musculus]
NM_011783.2	novel_mir530,novel_mir3372,novel_mir713,novel_mir5741,novel_mir2145,novel_mir700,novel_mir4536,novel_mir5459,novel_mir2826,novel_mir4478,novel_mir939,novel_mir1959,novel_mir5196,novel_mir674,novel_mir4935,novel_mir2760,novel_mir3438,mmu-miR-378a-5p,novel_mir2440,novel_mir1047,novel_mir782,novel_mir225,novel_mir659,novel_mir1249,novel_mir570,novel_mir1567,novel_mir3012,novel_mir1432,novel_mir4096,…	8mer-1a	NA	-22.97	156	Agr2	GO:0005615,GO:0005783,GO:0005739,GO:0005154,GO:0002162,GO:0042803,GO:0010628,GO:0060548,GO:0060480,GO:1903899,GO:0070254,GO:0048639,GO:0045742,GO:0048546,GO:1903896,GO:0010811,	K20356|1|1.0e-94|350.5|mmu:23795|anterior gradient protein 2	gi|6753010|ref|NP_035913.1|	2.83188e-127	anterior gradient protein 2 homolog precursor [Mus musculus]
NM_027642.2	novel_mir4718,novel_mir4991,novel_mir4649,novel_mir3299,novel_mir3052,novel_mir918,novel_mir101,novel_mir5713,novel_mir4746,novel_mir1168,novel_mir4376,novel_mir3753,novel_mir5117,novel_mir4733,novel_mir4049,novel_mir798,novel_mir690,novel_mir1799,novel_mir1078,novel_mir5214,novel_mir556,novel_mir5741,novel_mir3752,novel_mir1653,novel_mir6089,novel_mir3239,novel_mir286,novel_mir4202,mmu-miR-7043-…	7mer-m8	NA	-20.78	165	Phf6	GO:0005730,GO:0000776,GO:0005654,GO:0042393,GO:0008270,GO:0097110,GO:0043021,GO:0003677,GO:0051219,GO:0015631,GO:0042826,GO:0006355,	K18494|1|3.3e-28|132.1|cmy:102932556|histone-lysine N-methyltransferase SETDB2 [EC:2.1.1.43]	gi|28972852|dbj|BAC65842.1|	0	mKIAA1823 protein [Mus musculus]
NM_026729.1	novel_mir183,novel_mir2348,novel_mir4189,novel_mir3706,mmu-miR-191-3p,novel_mir129,novel_mir1573,novel_mir1321,novel_mir2840,novel_mir2184,novel_mir1540,mmu-miR-486a-3p,mmu-miR-7044-3p,novel_mir2232,novel_mir2481,novel_mir1308,mmu-miR-93-3p,novel_mir997,novel_mir4247,novel_mir696,novel_mir2021,novel_mir84,novel_mir366,novel_mir1297,novel_mir587,novel_mir3323,novel_mir1541,novel_mir898,novel_mir94…	7mer-m8	NA	-26.1	150	Ict1	GO:0005762,GO:0004045,GO:0043022,GO:0016150,GO:0070126,GO:0072344,	K15033|1|7.2e-90|334.3|mmu:68572|peptidyl-tRNA hydrolase ICT1 [EC:3.1.1.29]	gi|19387848|ref|NP_081005.1|	2.24222e-128	peptidyl-tRNA hydrolase ICT1, mitochondrial [Mus musculus]
NM_025314.3	novel_mir1452,novel_mir5692,novel_mir1381,novel_mir4549,novel_mir4161,novel_mir2838,novel_mir6118,novel_mir155,novel_mir3105,novel_mir134,novel_mir2024,novel_mir5272,novel_mir4292,novel_mir755,novel_mir913,novel_mir1346,novel_mir553,novel_mir582,novel_mir999,novel_mir585,novel_mir607,novel_mir2481,mmu-miR-3072-3p,novel_mir973,novel_mir1884,novel_mir2179,novel_mir1765,novel_mir109,novel_mir4018,no…	7mer-m8	NA	-25.62	159	Dtd1	GO:0005737,GO:0005634,GO:0002161,GO:0043765,GO:0046872,GO:0003677,GO:0044824,GO:0042578,GO:0051500,GO:0019478,GO:0006260,GO:0006399,	K07560|1|1.3e-113|414.1|mmu:66044|D-aminoacyl-tRNA deacylase [EC:3.1.1.96]	gi|13384676|ref|NP_079590.1|	5.5778e-154	D-tyrosyl-tRNA(Tyr) deacylase 1 [Mus musculus]
NM_001127324.1	novel_mir5573,novel_mir1065,novel_mir2357,novel_mir2922,novel_mir5395,novel_mir2020,novel_mir1313,novel_mir271,mmu-miR-15a-5p,novel_mir1685,novel_mir2892,novel_mir495,novel_mir4181,novel_mir2657,novel_mir3952,novel_mir1791,novel_mir1106,novel_mir98,novel_mir2408,novel_mir329,novel_mir647,novel_mir734,mmu-miR-370-3p,novel_mir653,novel_mir917,novel_mir5887,novel_mir4192,novel_mir5807,novel_mir4362,…	6mer	NA	-24.8	148	Ercc1	GO:0000110,GO:0000784,GO:0005737,GO:0005669,GO:0070522,GO:0003684,GO:0008022,GO:0003697,GO:0019904,GO:0017025,GO:0000014,GO:0001094,GO:0000720,GO:0009650,GO:0006312,GO:0010165,GO:0032205,GO:0035166,GO:0006949,GO:0036297,GO:0001302,GO:0007283,GO:0008283,GO:0008584,GO:0006302,GO:0006296,GO:0010259,GO:1904431,GO:0048477,GO:0006295,GO:0035264,GO:0006979,GO:0045190,	K10849|1|1.1e-133|480.7|mmu:13870|DNA excision repair protein ERCC-1	gi|568944858|ref|XP_006539602.1|	1.64541e-156	PREDICTED: DNA excision repair protein ERCC-1 isoform X1 [Mus musculus]
NM_001163615.1	novel_mir3371,novel_mir4515	7mer-1a	NA	-22.93	147	Krtap20-2	-	K14692|1|2.7e-09|66.2|aqu:100634335|solute carrier family 30 (zinc transporter), member 5/7!K17335|4|2.7e-09|66.2|dpe:6602686|nuclear factor of activated T-cells 5	gi|254692849|ref|NP_001157087.1|	7.76507e-26	keratin associated protein 20-2 [Mus musculus]
XM_006500405.2	novel_mir1876,novel_mir3311,novel_mir4021,novel_mir2535,novel_mir5337,novel_mir5099,novel_mir673,novel_mir2394,novel_mir1800,novel_mir3745,novel_mir1989,novel_mir2396,novel_mir2212,novel_mir3218,novel_mir2100,novel_mir3499,novel_mir955,novel_mir4068,novel_mir4097,novel_mir2829,novel_mir4840,novel_mir465,novel_mir3938,novel_mir2287,novel_mir679,novel_mir1157,novel_mir87,novel_mir3876,novel_mir5838…	6mer	NA	-26.94	153	Sla2	GO:0005770,GO:0005886,GO:0047485,GO:0005070,GO:0000122,GO:0050849,GO:0042110,GO:0002250,	K05856|1|2.3e-36|158.7|pvt:110082790|lymphocyte cell-specific protein tyrosine kinase [EC:2.7.10.2]!K05854|2|6.7e-36|157.1|clv:102084226|tyrosine-protein kinase Lyn [EC:2.7.10.2]!K08890|3|1.2e-35|156.4|tup:102480506|B lymphoid tyrosine kinase [EC:2.7.10.2]	gi|124249228|ref|NP_084259.1|	0	src-like-adapter 2 [Mus musculus]
NM_175030.2	novel_mir658,novel_mir1245,novel_mir382,novel_mir193,novel_mir3628,novel_mir457,novel_mir3599,novel_mir4520,novel_mir1204,mmu-miR-328-5p,novel_mir2624,novel_mir2408,novel_mir429,novel_mir3562,novel_mir3618,novel_mir922,novel_mir1402,novel_mir1683,novel_mir4071,novel_mir318,novel_mir5522,novel_mir4380,novel_mir2941,novel_mir5783,novel_mir950,novel_mir3840,novel_mir4012,novel_mir4542,novel_mir142,n…	8mer-1a	NA	-22.1	149	Tctex1d4	GO:0005815,GO:0001669,GO:0005930,GO:0036126,GO:0005634,GO:0008157,	K22866|1|9.9e-18|95.1|sko:100371047|tctex1 domain-containing protein 2	gi|33239425|ref|NP_778195.1|	8.43586e-157	tctex1 domain-containing protein 4 [Mus musculus]
NM_013923.2	novel_mir2874,novel_mir5876,mmu-miR-150-5p,novel_mir312,novel_mir1023,novel_mir3481,novel_mir2547,novel_mir2250,novel_mir2830,novel_mir6091,novel_mir1664,novel_mir3790,novel_mir4101,novel_mir1063,novel_mir4645,novel_mir1836,mmu-miR-140-5p,novel_mir6093,novel_mir1353,novel_mir2490,novel_mir5997,novel_mir340,novel_mir607,novel_mir2127,novel_mir1072,novel_mir3318,novel_mir4489,novel_mir3961,novel_mi…	6mer	NA	-20.35	157	Rnf19a	-	K11972|1|0.0e+00|1703.7|mmu:30945|E3 ubiquitin-protein ligase RNF19A [EC:2.3.2.31]	-	-	-
XM_006532574.2	novel_mir527,novel_mir2783,novel_mir1338,novel_mir66,novel_mir4599,novel_mir2178,novel_mir2564,mmu-miR-7682-3p,novel_mir1403,novel_mir5482,novel_mir2573,novel_mir4520,novel_mir1281,novel_mir1108,novel_mir491,novel_mir4380,novel_mir3490,novel_mir1968,novel_mir1405,novel_mir1169,novel_mir496,novel_mir1368,novel_mir4968,mmu-miR-298-5p,novel_mir588,mmu-miR-143-5p,novel_mir2657,novel_mir5301,novel_mir…	7mer-1a	NA	-90.2	624	Itgb4	-	K06525|1|0.0e+00|3239.5|ggo:101141382|integrin beta 4	gi|568972378|ref|XP_006532636.1|	0	PREDICTED: integrin beta-4 isoform X1 [Mus musculus]
NM_134164.5	novel_mir2994,novel_mir3990,novel_mir2573,novel_mir372,novel_mir4520,novel_mir3191,novel_mir2132,novel_mir1281,novel_mir5482,novel_mir4910,novel_mir387,novel_mir202,novel_mir3507,novel_mir657,novel_mir2564,novel_mir4500,novel_mir4516,novel_mir66,novel_mir1082,novel_mir4565,mmu-miR-298-5p,novel_mir4005,novel_mir2126,novel_mir2742,mmu-miR-6943-3p,novel_mir2010,novel_mir1169,novel_mir1690,novel_mir4…	6mer	NA	-22.2	151	Syt12	GO:0030672,GO:0016021,GO:0030054,GO:0005886,GO:0005509,GO:0030276,GO:0005544,GO:0019905,GO:0046928,GO:0006906,GO:0048792,GO:0048791,GO:0060291,GO:0017158,GO:0048488,	K19912|1|6.9e-241|838.2|mmu:171180|synaptotagmin-12	gi|19527400|ref|NP_598925.1|	0	synaptotagmin-12 [Mus musculus]
NM_009854.2	novel_mir1213,novel_mir4529,novel_mir88,novel_mir5263,novel_mir2681,novel_mir6034,novel_mir532,novel_mir3243,novel_mir755,novel_mir1423,novel_mir3436,novel_mir1343,novel_mir3529,novel_mir633,novel_mir5797,novel_mir3544,novel_mir2802,novel_mir118,mmu-miR-351-5p,novel_mir1150,novel_mir1696,novel_mir5650,novel_mir269,novel_mir2781,novel_mir838,novel_mir244,novel_mir2826,novel_mir773,novel_mir530,nov…	6mer	NA	-22.38	147	Cd7	GO:0016021,GO:0070062,GO:0002250,GO:0048873,	K06457|1|7.1e-115|417.9|mmu:12516|T-cell surface glycoprotein CD7	gi|6806905|ref|NP_033984.1|	8.5269e-156	T-cell antigen CD7 precursor [Mus musculus]
NM_021424.2	novel_mir344,novel_mir3334,novel_mir4171,novel_mir3706,novel_mir4776,novel_mir1304,mmu-miR-103-3p,novel_mir1770,mmu-miR-185-5p,novel_mir1166,novel_mir330,novel_mir5350,novel_mir4398,novel_mir4614,novel_mir4513,novel_mir2600,novel_mir1351,novel_mir4794,novel_mir152,novel_mir5889,novel_mir991,novel_mir25,novel_mir4692,novel_mir1235,novel_mir1154,novel_mir4008,novel_mir5623,novel_mir953,novel_mir347…	7mer-m8	NA	-21.49	150	Nectin1	GO:0005887,GO:0044291,GO:0016342,GO:0043231,GO:0032584,GO:0043296,GO:0005913,GO:0030424,GO:0045202,GO:0050839,GO:0030246,GO:0005102,GO:0046790,GO:0046982,GO:0004872,GO:0042803,GO:0007411,GO:1902414,GO:0046718,GO:0007156,GO:0006826,GO:0060041,GO:0007157,GO:0008037,GO:0002934,GO:0070166,GO:0051963,GO:0002089,	K06081|1|2.7e-308|1062.8|mmu:58235|poliovirus receptor-related protein 1	gi|40254534|ref|NP_067399.2|	0	nectin-1 precursor [Mus musculus]
NM_029898.3	novel_mir1411,novel_mir5303,novel_mir729,novel_mir2780,mmu-miR-21a-3p,novel_mir1442,novel_mir3387,novel_mir3868,novel_mir5239,novel_mir2272,novel_mir555,novel_mir1066,novel_mir802,novel_mir5004,novel_mir5887,novel_mir68,novel_mir774,novel_mir1025,novel_mir308,novel_mir1549,novel_mir685,novel_mir2475,novel_mir126,novel_mir2106,mmu-let-7k,novel_mir2477,novel_mir127,novel_mir1816,novel_mir661,novel_…	6mer	NA	-21.97	152	Ankrd55	-	K19626|1|2.3e-43|181.8|crg:105319221|inversin	gi|270288786|ref|NP_084174.2|	0	ankyrin repeat domain-containing protein 55 isoform 1 [Mus musculus]
NM_146169.2	novel_mir693,mmu-miR-137-3p,novel_mir4017,novel_mir264,novel_mir895,novel_mir162,novel_mir638,novel_mir3263,novel_mir5698,novel_mir1439,novel_mir3673,novel_mir3785,novel_mir4667,novel_mir1985,novel_mir591,novel_mir5984,novel_mir3911,novel_mir2632,novel_mir4316,novel_mir360,novel_mir4946,novel_mir419,novel_mir2442,mmu-miR-210-5p,novel_mir3052,novel_mir4746,novel_mir5088,novel_mir5127,novel_mir123,…	7mer-1a	NA	-20.27	146	Paip2b	GO:0000900,GO:0008143,GO:0045947,	-	gi|40807347|ref|NP_666281.2|	7.33554e-98	polyadenylate-binding protein-interacting protein 2B [Mus musculus]
NM_153167.2	novel_mir4017,novel_mir497,novel_mir3193,novel_mir1582,novel_mir335,novel_mir3483,novel_mir4387,novel_mir5272,novel_mir789,novel_mir1684,novel_mir494,novel_mir633,novel_mir2183,novel_mir3785,mmu-miR-376b-5p,novel_mir4907,novel_mir206,novel_mir692,novel_mir4624,novel_mir7,novel_mir3413,novel_mir5008,novel_mir186,novel_mir5706,novel_mir5296,novel_mir4862,novel_mir5016,mmu-miR-3095-3p,novel_mir2175,…	7mer-m8	NA	-22.35	153	Dcaf10	GO:0080008,	K11802|1|0.0e+00|1166.8|mmu:242418|WD repeat-containing protein 32	gi|568926675|ref|XP_006537975.1|	0	PREDICTED: DDB1- and CUL4-associated factor 10 isoform X1 [Mus musculus]
NM_198033.2	novel_mir3660,novel_mir3859,novel_mir4225,novel_mir5338,novel_mir1054,novel_mir535,mmu-miR-8116,novel_mir3205,novel_mir761,novel_mir117,novel_mir2131,novel_mir573,novel_mir2827,novel_mir5781,novel_mir1366,novel_mir742,novel_mir4566,novel_mir2168,novel_mir406,novel_mir5956,novel_mir1899,novel_mir2091,novel_mir273,novel_mir388,novel_mir5414,novel_mir3897,novel_mir5721,novel_mir140,novel_mir917,nove…	6mer	NA	-21.71	151	Setx	GO:0030426,GO:0000781,GO:0005654,GO:0030424,GO:0005737,GO:0000228,GO:0001147,GO:0042802,GO:0005524,GO:0004386,GO:0033120,GO:2000806,GO:0007283,GO:2000144,GO:0070301,GO:0006376,GO:0071300,GO:0006302,GO:0006310,GO:0043491,GO:0007623,GO:0010976,GO:0043066,GO:0000165,GO:0008543,	K10706|1|0.0e+00|5296.9|mmu:269254|senataxin [EC:3.6.4.-]	gi|568913773|ref|XP_006498142.1|	0	PREDICTED: probable helicase senataxin isoform X1 [Mus musculus]
XR_878327.1	novel_mir4672,novel_mir3239,novel_mir2905,mmu-miR-7043-3p,novel_mir4202,mmu-miR-423-5p,novel_mir5101,novel_mir2239,novel_mir2894,novel_mir2232,novel_mir3322,novel_mir1213,novel_mir2236,novel_mir5514,novel_mir124,novel_mir1346,novel_mir1582,novel_mir585,novel_mir3870,novel_mir3013,novel_mir2398,novel_mir380,mmu-miR-152-3p,novel_mir1684,novel_mir4144,novel_mir4077,novel_mir3343,novel_mir3255,novel_…	6mer	NA	-47.95	304	Traf3ip1	-	-	-	-	-
NM_026791.2	novel_mir2710,novel_mir3408,novel_mir2806,novel_mir1338,novel_mir3007,novel_mir1863,novel_mir3480,novel_mir5457,novel_mir393,novel_mir3325,novel_mir5723,novel_mir1368,mmu-miR-298-5p,mmu-miR-7044-3p,novel_mir764,novel_mir816,novel_mir822,novel_mir1065,novel_mir3280,novel_mir2511,novel_mir1874,novel_mir5105,novel_mir1294,novel_mir2270,novel_mir5521,mmu-miR-128-3p,novel_mir329,novel_mir4096,novel_mi…	7mer-m8	NA	-54.29	323	Fbxw9	-	K10265|1|1.5e-269|932.6|mmu:68628|F-box and WD-40 domain protein 9	gi|568957499|ref|XP_006531397.1|	0	PREDICTED: F-box/WD repeat-containing protein 9 isoform X1 [Mus musculus]
NM_001177872.1	novel_mir3355,novel_mir1326,novel_mir2990,novel_mir4935,novel_mir336,novel_mir2214,novel_mir4736,novel_mir610,novel_mir1541,novel_mir2655,novel_mir1655,novel_mir2649,novel_mir1399,novel_mir4706,mmu-miR-466i-5p,novel_mir233,novel_mir472,novel_mir1345,novel_mir2279,novel_mir1856,novel_mir4398,novel_mir3191,novel_mir2073,novel_mir1244,novel_mir303,novel_mir1191,novel_mir1037,novel_mir763,mmu-miR-346…	6mer	NA	-26.72	153	Trim15	GO:0005622,GO:0008270,GO:0032481,GO:1902187,GO:1900246,GO:1901253,GO:0051092,	K12005|1|3.1e-163|579.3|mmu:69097|tripartite motif-containing protein 15	gi|295424126|ref|NP_001171343.1|	0	tripartite motif-containing protein 15 isoform 1 [Mus musculus]
NM_172050.2	novel_mir4848,novel_mir424,novel_mir853,novel_mir7,novel_mir3802,novel_mir2223,novel_mir2386,novel_mir4508,novel_mir4304,novel_mir1799,novel_mir457,novel_mir3671,novel_mir798,novel_mir1667,novel_mir5477,novel_mir2748,novel_mir2737,novel_mir773,novel_mir4203,novel_mir1072,novel_mir2189,novel_mir4331,novel_mir3976,novel_mir2490,novel_mir5795,novel_mir1596,novel_mir4173,novel_mir1449,mmu-miR-3057-5p…	7mer-m8	NA	-20.27	145	Cd300e	GO:0016021,GO:0070062,GO:0005886,GO:0002376,	K06719|1|5.2e-111|406.0|mmu:217306|CD300 antigen	gi|25286711|ref|NP_742047.1|	1.98394e-143	CMRF35-like molecule 2 precursor [Mus musculus]
NM_153774.1	novel_mir2759,novel_mir569,novel_mir4024,novel_mir124,novel_mir3698,novel_mir4247,novel_mir3754,novel_mir2143,novel_mir4564,novel_mir3082,novel_mir3243,novel_mir2361,novel_mir45,novel_mir2773,novel_mir928,novel_mir5056,novel_mir3911,novel_mir3811,novel_mir1820,novel_mir1317,novel_mir4897,novel_mir3915,novel_mir419,novel_mir1150,novel_mir5078,novel_mir1927,novel_mir5145,novel_mir2155,novel_mir123,…	7mer-m8	NA	-22.98	152	Ipo9	GO:0005829,GO:0005635,GO:0016020,GO:0008565,GO:0008536,GO:0042393,GO:0042991,GO:0050821,GO:0042254,GO:0006610,	K20224|1|0.0e+00|2043.5|rno:304817|importin-9	gi|112734861|ref|NP_722469.1|	0	importin-9 [Mus musculus]
NM_001081235.1	mmu-miR-320-3p,novel_mir4015,novel_mir269,novel_mir1359,novel_mir178,novel_mir858,novel_mir4589,novel_mir4356,novel_mir121,novel_mir4746,novel_mir4376,novel_mir3696,novel_mir1927,novel_mir302,novel_mir5829,novel_mir1150,novel_mir5078,novel_mir1746,novel_mir1884,novel_mir4733,novel_mir1781,novel_mir6013,novel_mir514,novel_mir4105,novel_mir4536,novel_mir5354,novel_mir3882,novel_mir4663,novel_mir507…	6mer	NA	-49.33	290	Mn1	GO:0006355,GO:0001957,GO:0007275,	K22543|1|0.0e+00|2711.0|mmu:433938|transcriptional activator MN1	gi|124486985|ref|NP_001074704.1|	0	transcriptional activator MN1 [Mus musculus]
NR_073086.1	novel_mir4056,novel_mir6089,novel_mir3618,novel_mir755,novel_mir1537,novel_mir1773,novel_mir3322,novel_mir3682,novel_mir3287,novel_mir1039,novel_mir5522,novel_mir1429,novel_mir245,novel_mir301,novel_mir582,novel_mir1130,novel_mir248,novel_mir322,novel_mir3544,novel_mir618,novel_mir601,novel_mir1381,novel_mir1253,novel_mir5596,novel_mir6147,novel_mir3529,novel_mir5382,novel_mir1085,novel_mir6077,n…	7mer-m8	NA	-25.74	154	Hoxd11	-	-	-	-	-
NM_023794.2	novel_mir2483,novel_mir1662,mmu-miR-350-3p,novel_mir2269,mmu-miR-615-3p,mmu-miR-18a-3p,novel_mir27,novel_mir26,novel_mir2738,novel_mir2615,novel_mir1497,novel_mir1464,novel_mir2918,novel_mir166,novel_mir1691,novel_mir6150,novel_mir95,novel_mir4920,novel_mir3425,novel_mir1119,novel_mir4108,novel_mir4596,novel_mir2031,novel_mir523,novel_mir1165,novel_mir5131,novel_mir4660,mmu-miR-92b-5p,mmu-miR-330…	6mer	NA	-41.97	299	Etv5	GO:0005654,GO:0005886,GO:0000977,GO:0001228,GO:0007626,GO:0060762,GO:0048133,GO:0071340,GO:0060252,GO:0050807,GO:0045666,GO:0045944,GO:0007274,GO:0034599,	K15593|1|0.0e+00|1089.7|cge:100756646|ets translocation variant 5	gi|148665211|gb|EDK97627.1|	0	mCG127346, isoform CRA_b, partial [Mus musculus]
NM_146057.3	novel_mir1366,novel_mir893,novel_mir2460,novel_mir5640,novel_mir5569,novel_mir2997,novel_mir4331,novel_mir4461,novel_mir3744,novel_mir242,novel_mir697,novel_mir2838,novel_mir5160,novel_mir866,novel_mir3316,novel_mir140,novel_mir1920,novel_mir994,novel_mir1762,novel_mir2001,novel_mir853,novel_mir1512,novel_mir316,novel_mir370,novel_mir2899,mmu-miR-324-3p,novel_mir841,novel_mir1249,novel_mir5062,no…	6mer	NA	-21.92	151	Dap	GO:0070513,GO:0032088,GO:0034198,GO:0010507,GO:0006919,GO:0097190,GO:0045892,	-	gi|22122539|ref|NP_666169.1|	5.6616e-68	death-associated protein 1 [Mus musculus]
NM_026964.3	novel_mir1995,novel_mir1492,novel_mir4733,novel_mir1861,novel_mir6027,novel_mir3752,mmu-miR-149-5p,novel_mir371,novel_mir3664,novel_mir1766,novel_mir3661,novel_mir1168,novel_mir1715,novel_mir994,novel_mir20,novel_mir632,novel_mir316,novel_mir5177,novel_mir4993,novel_mir791,novel_mir531,novel_mir5062,novel_mir1835,novel_mir1820,novel_mir601,novel_mir4461,novel_mir3172,novel_mir6134,novel_mir488,no…	6mer	NA	-22.09	147	Ccdc124	GO:0005856,GO:0005737,GO:0005886,GO:0007049,GO:0051301,	K06088|1|2.6e-20|103.6|oaa:100681791|occludin!K12327|2|3.5e-09|66.6|tng:GSTEN00029714G001|caldesmon!K20045|5|1.3e-08|64.7|hcq:109528467|intersectin	gi|47059143|ref|NP_081240.1|	1.66179e-150	coiled-coil domain-containing protein 124 [Mus musculus]
NM_001081409.1	novel_mir519,novel_mir5943,novel_mir1903,novel_mir1768,novel_mir4135,novel_mir389,novel_mir327,novel_mir2331,novel_mir1681,novel_mir3387,mmu-miR-434-3p,novel_mir1339,novel_mir1775,novel_mir5800,novel_mir2364,novel_mir5358,novel_mir2978,novel_mir6001,novel_mir3810,novel_mir4526,novel_mir431,novel_mir4403,novel_mir4085,novel_mir1649,novel_mir1793,novel_mir1769,novel_mir972,novel_mir344,novel_mir912…	6mer	NA	-20.47	156	Phf20l1	-	K18402|1|0.0e+00|2060.0|mmu:239510|PHD finger protein 20	gi|38181596|gb|AAH61492.1|	0	Phf20l1 protein, partial [Mus musculus]
NM_009955.3	novel_mir1794,novel_mir178,novel_mir4941,novel_mir123,novel_mir4438,novel_mir5088,novel_mir4318,novel_mir5078,novel_mir1150,novel_mir2442,novel_mir5706,novel_mir5481,novel_mir3103,novel_mir2205,novel_mir1600,novel_mir733,novel_mir4105,mmu-miR-149-5p,mmu-miR-3095-3p,novel_mir470,novel_mir377,novel_mir4752,novel_mir109,novel_mir468,novel_mir2143,novel_mir3754,novel_mir4247,novel_mir4588,novel_mir19…	6mer	NA	-45.32	302	Dpysl2	GO:0016020,GO:0030426,GO:0043209,GO:0005829,GO:0005874,GO:0030425,GO:0043025,GO:0043234,GO:0043195,GO:0070062,GO:0005739,GO:0019901,GO:0008017,GO:0016810,GO:0007411,GO:0007010,GO:0001975,GO:0048489,GO:0021510,GO:0006897,GO:0042493,GO:0021772,GO:0030516,GO:0014049,GO:0042220,	K07528|1|0.0e+00|1119.8|hgl:101710925|dihydropyrimidinase-like 2	gi|40254595|ref|NP_034085.2|	0	dihydropyrimidinase-related protein 2 [Mus musculus]
XM_006500271.3	novel_mir3160,novel_mir5193,novel_mir4045,novel_mir2886,mmu-miR-351-5p,novel_mir426,novel_mir4049,novel_mir849,novel_mir2021,novel_mir1229,novel_mir581,novel_mir1543,novel_mir971,novel_mir508,novel_mir5507,novel_mir1395,novel_mir3644,novel_mir1090,novel_mir1773,novel_mir907,novel_mir2706,novel_mir5995,novel_mir1780,novel_mir979,novel_mir2481,novel_mir301,novel_mir245,novel_mir189,novel_mir1289,no…	7mer-1a	NA	-23.48	148	Rin2	GO:0005737,GO:0005096,GO:0007165,GO:0006897,	K17638|1|2.8e-102|378.3|xla:108715126|Ras and Rab interactor 1	gi|341942153|sp|Q9D684.3|RIN2_MOUSE	0	RecName: Full=Ras and Rab interactor 2; AltName: Full=Ras interaction/interference protein 2
NM_172964.4	novel_mir429,novel_mir598,novel_mir2577,novel_mir508,novel_mir3644,novel_mir4672,novel_mir3685,novel_mir1773,novel_mir1171,novel_mir5522,novel_mir5806,novel_mir5995,novel_mir1506,novel_mir245,novel_mir301,novel_mir3420,novel_mir1245,novel_mir3129,novel_mir4998,mmu-miR-191-3p,novel_mir129,novel_mir2722,novel_mir2184,novel_mir4209,novel_mir2047,novel_mir1381,mmu-let-7g-5p,novel_mir322,novel_mir3302…	6mer	NA	-25.14	158	Arhgap28	GO:0030054,GO:0005654,GO:0005096,GO:0051497,GO:0007165,GO:1904425,	K20639|1|0.0e+00|1434.9|mmu:268970|Rho GTPase-activating protein 18/28/40	gi|226342973|ref|NP_766552.3|	0	rho GTPase-activating protein 28 [Mus musculus]
NM_008407.2	novel_mir830,novel_mir568,novel_mir6104,novel_mir1492,novel_mir3541,novel_mir1657,novel_mir3741,novel_mir2131,novel_mir4749,novel_mir1825,novel_mir1769,novel_mir656,novel_mir1133,novel_mir5386,novel_mir5307,novel_mir316,novel_mir2194,novel_mir1168,novel_mir437,novel_mir1814,mmu-miR-6914-3p,novel_mir4067,novel_mir1663,novel_mir1841,novel_mir1787,novel_mir5940,novel_mir4570,novel_mir1258,mmu-miR-33…	6mer	NA	-20.33	157	Itih3	-	K19014|1|1.3e-304|1049.7|shr:100925940|inter-alpha-trypsin inhibitor heavy chain H1	gi|159110717|ref|NP_032433.2|	0	inter-alpha-trypsin inhibitor heavy chain H3 preproprotein [Mus musculus]
NM_008082.2	novel_mir1338,novel_mir3393,novel_mir1570,novel_mir5313,novel_mir303,novel_mir912,novel_mir1232,novel_mir657,novel_mir2850,novel_mir3507,novel_mir2870,novel_mir325,mmu-miR-8112,novel_mir4125,novel_mir125,novel_mir2247,novel_mir4958,mmu-miR-7240-5p,mmu-miR-326-3p,novel_mir2704,novel_mir660,novel_mir1284,novel_mir4596,novel_mir4551,novel_mir343,novel_mir2311,novel_mir3070,novel_mir2541,novel_mir551…	7mer-m8	NA	-23.02	151	Galr1	GO:0005887,GO:0017046,GO:0004966,GO:0042923,GO:0007194,GO:0007204,GO:0007200,GO:0007218,GO:0007189,GO:0051464,GO:0045944,	K04230|1|3.2e-202|709.5|mmu:14427|galanin receptor 1	gi|6679933|ref|NP_032108.1|	0	galanin receptor type 1 [Mus musculus]
XM_011251006.2	novel_mir1526,novel_mir436,novel_mir1001,novel_mir4973,mmu-miR-7044-3p,novel_mir4958,novel_mir1384,novel_mir5134,mmu-miR-6900-3p,novel_mir2816,novel_mir1165,novel_mir2124,novel_mir26,novel_mir5457,novel_mir4227,novel_mir278,novel_mir3701,novel_mir5023,novel_mir851,novel_mir480,novel_mir1613,novel_mir4553,novel_mir4783,novel_mir4757,novel_mir3494,novel_mir3358,novel_mir3908,novel_mir653,novel_mir4…	7mer-1a	NA	-47.63	316	Tenm1	GO:0005856,GO:0005887,GO:0005576,GO:0005737,GO:0005634,GO:0046982,GO:0042803,GO:0006355,GO:0007218,	K06252|1|5.0e-59|236.1|xtr:100491528|tenascin	gi|569009290|ref|XP_006541555.1|	0	PREDICTED: teneurin-1 isoform X3 [Mus musculus]
NM_016709.2	novel_mir3642,novel_mir5920,novel_mir4479,novel_mir1591,novel_mir1157,novel_mir453,novel_mir4709,novel_mir191,novel_mir3326,novel_mir1119,novel_mir5759,novel_mir4108,novel_mir465,novel_mir1165,novel_mir3070,novel_mir303,novel_mir4500,novel_mir3677,novel_mir1304,novel_mir168,novel_mir1166,novel_mir2789,novel_mir2161,novel_mir4516,novel_mir3138,novel_mir4520,novel_mir251,novel_mir4107,novel_mir4763…	7mer-m8	NA	-48.8	307	Auh	-	K05607|1|1.2e-170|603.6|mmu:11992|methylglutaconyl-CoA hydratase [EC:4.2.1.18]	gi|755544657|ref|XP_011242674.1|	5.8433e-135	PREDICTED: methylglutaconyl-CoA hydratase, mitochondrial isoform X1 [Mus musculus]
NM_175306.4	novel_mir3243,mmu-miR-7043-3p,novel_mir5968,novel_mir895,novel_mir5211,novel_mir305,novel_mir1213,novel_mir264,novel_mir1582,novel_mir197,novel_mir1943,novel_mir4017,novel_mir77,novel_mir693,novel_mir2671,novel_mir5094,novel_mir6134,novel_mir4624,novel_mir738,novel_mir3517,novel_mir5961,novel_mir5984,novel_mir1264,novel_mir1271,novel_mir3785,novel_mir6118,novel_mir4446,novel_mir540,novel_mir359,n…	6mer	NA	-29.31	166	Phactr4	-	K17585|1|0.0e+00|1387.1|mmu:100169|phosphatase and actin regulator 4	gi|568930393|ref|XP_006538519.1|	0	PREDICTED: phosphatase and actin regulator 4 isoform X1 [Mus musculus]
NM_009627.1	novel_mir4560,novel_mir1862,mmu-miR-25-3p,novel_mir5491,novel_mir3255,novel_mir4791,novel_mir3785,novel_mir75,novel_mir4588,novel_mir585,mmu-miR-7052-3p,novel_mir5310,novel_mir1780,novel_mir2232,novel_mir4105,novel_mir767,novel_mir83,novel_mir3670,novel_mir2737,novel_mir890,mmu-miR-3097-3p,novel_mir4746,novel_mir78,novel_mir919,novel_mir3144,novel_mir4649,novel_mir5498,novel_mir3281,novel_mir4508…	6mer	NA	-20.78	160	Adm	GO:0005615,GO:0005737,GO:0031700,GO:0005179,GO:0043065,GO:0019933,GO:0019731,GO:0050830,GO:0001843,GO:0008284,GO:0007204,GO:0045906,GO:0043116,GO:0007507,GO:0042475,GO:0031102,GO:0045766,GO:0001878,GO:0031100,GO:0060712,GO:0032868,GO:0002026,GO:0008209,GO:0001666,GO:0010460,GO:0007568,GO:0042594,GO:0002031,GO:0051384,GO:0097084,GO:2001214,GO:0046879,GO:0060670,GO:0008285,GO:0048589,GO:0007565,GO:…	K12333|1|1.2e-101|374.4|mmu:11535|adrenomedullin	gi|6752988|ref|NP_033757.1|	1.12866e-135	ADM precursor [Mus musculus]
NM_001081981.2	mmu-miR-25-5p,novel_mir187,novel_mir4067,novel_mir2665,novel_mir4783,novel_mir5812,novel_mir329,novel_mir2140,novel_mir2079,novel_mir433,novel_mir6160,novel_mir1294,novel_mir2324,novel_mir5547,novel_mir546,novel_mir939,novel_mir6124,novel_mir4188,novel_mir677,novel_mir1451,novel_mir1065,novel_mir1001,novel_mir4796,novel_mir745,mmu-miR-425-5p,novel_mir1568,novel_mir1363,novel_mir1960,novel_mir523,…	7mer-m8	NA	-20.11	144	Nfix	-	K09171|1|9.0e-293|1011.5|hgl:101722219|nuclear factor I/X	gi|568956308|ref|XP_006530820.1|	0	PREDICTED: nuclear factor 1 X-type isoform X3 [Mus musculus]
XM_006520761.2	novel_mir5553,novel_mir4452,novel_mir4225,novel_mir1093,novel_mir3668,novel_mir4045,novel_mir221,novel_mir2129,novel_mir4316,novel_mir4559,novel_mir231,novel_mir4318,novel_mir2187,mmu-miR-17-3p,novel_mir5041,novel_mir381,novel_mir247,novel_mir49,novel_mir1502,novel_mir4203,novel_mir3205,novel_mir2991,novel_mir1975,novel_mir508,novel_mir4220,novel_mir2088,novel_mir5215,novel_mir1353,novel_mir2239,…	6mer	NA	-20.57	149	Fam49b	-	K12196|1|1.6e-38|165.2|egl:EGR_01166|vacuolar protein-sorting-associated protein 4	gi|568992028|ref|XP_006520829.1|	4.20887e-131	PREDICTED: protein FAM49B isoform X3 [Mus musculus]
XM_011248933.2	novel_mir729,novel_mir4762,novel_mir6016,novel_mir3284,novel_mir433,novel_mir5580,novel_mir1905,mmu-miR-337-3p,novel_mir1336,novel_mir3787,novel_mir700,novel_mir2182,novel_mir2699,novel_mir3280,novel_mir59,novel_mir2561,novel_mir1390,novel_mir875,novel_mir619,novel_mir373,novel_mir4804,novel_mir3225,novel_mir58,novel_mir3977,novel_mir1509,novel_mir2253,novel_mir374,novel_mir3985,novel_mir3315,nov…	7mer-1a	NA	-20.55	143	Ggnbp2	GO:0005634,GO:0031410,GO:0005515,GO:0007283,GO:0030154,GO:0007275,	-	gi|139949213|ref|NP_694784.2|	0	gametogenetin-binding protein 2 [Mus musculus]
NM_181348.4	mmu-miR-206-3p,novel_mir334,novel_mir2069,novel_mir4907,novel_mir1985,novel_mir4013,novel_mir3673,novel_mir3785,novel_mir217,novel_mir2328,novel_mir5928,novel_mir4077,novel_mir789,novel_mir3784,novel_mir5272,novel_mir3329,novel_mir403,mmu-miR-7043-3p,novel_mir3483,novel_mir1582,mmu-miR-7052-3p,novel_mir497,novel_mir1003,novel_mir4914,novel_mir4685,novel_mir432,novel_mir2011,novel_mir752,novel_mir…	7mer-m8	NA	-23.39	159	Prune2	-	K18449|1|0.0e+00|6262.6|mmu:353211|prune homolog 2	gi|242332583|ref|NP_851993.3|	0	protein prune homolog 2 [Mus musculus]
NM_027318.4	novel_mir5778,novel_mir1369,novel_mir3324,novel_mir124,novel_mir2997,novel_mir693,novel_mir3457,novel_mir893,novel_mir1472,novel_mir5640,novel_mir4387,novel_mir1817,novel_mir3116,novel_mir1706,novel_mir137,novel_mir183,novel_mir1878,novel_mir6077,novel_mir3919,novel_mir3744,novel_mir5447,novel_mir1712,novel_mir248,novel_mir3434,novel_mir2215,novel_mir302,novel_mir853,novel_mir1762,novel_mir370,no…	6mer	NA	-25.11	166	Znhit1	GO:0000812,GO:0042826,GO:0031491,GO:0000122,GO:0031063,GO:0070317,GO:0043486,GO:0042129,	K11663|1|3.0e-87|326.2|rno:100360077|zinc finger HIT domain-containing protein 1	gi|58037197|ref|NP_081594.1|	1.5822e-110	zinc finger HIT domain-containing protein 1 isoform 1 [Mus musculus]
NM_153526.5	novel_mir2826,novel_mir4203,novel_mir559,novel_mir2624,novel_mir530,novel_mir1046,novel_mir3719,novel_mir395,novel_mir1758,novel_mir3186,novel_mir4498,novel_mir612,novel_mir353,novel_mir457,novel_mir2164,mmu-miR-148a-3p,novel_mir705,novel_mir5185,novel_mir5062,novel_mir4361,novel_mir513,mmu-miR-505-5p,novel_mir1792,novel_mir5853,novel_mir1762,novel_mir1733,novel_mir857,novel_mir2307,novel_mir2670…	7mer-1a	NA	-23.76	151	Insig1	GO:0032937,GO:0005515,GO:0032933,GO:0060021,GO:0032869,GO:0070542,GO:0032355,GO:0060363,GO:0042472,GO:1901303,GO:0006695,GO:0042474,GO:0010894,GO:0006641,GO:0045717,GO:0045599,	-	gi|23943846|ref|NP_705746.1|	0	insulin-induced gene 1 protein [Mus musculus]
XM_011238813.1	novel_mir3386,novel_mir2726,novel_mir146,novel_mir1777,novel_mir588,novel_mir1318,novel_mir523,novel_mir276,novel_mir2178,novel_mir6098,novel_mir369,novel_mir657,novel_mir66,novel_mir2782,novel_mir438,novel_mir2132,novel_mir1187,novel_mir4518,novel_mir5716,novel_mir5811,novel_mir5478,novel_mir4783,novel_mir2272,novel_mir2078,novel_mir307,novel_mir68,novel_mir717,novel_mir3358,novel_mir787,novel_m…	8mer-1a	NA	-24.71	166	Zbtb37	-	K10509|1|5.2e-296|1021.1|mmu:240869|zinc finger and BTB domain-containing protein 37	gi|27734134|ref|NP_775600.1|	0	zinc finger and BTB domain-containing protein 37 [Mus musculus]
NM_009903.2	novel_mir3471,novel_mir1844,novel_mir1960,mmu-miR-214-5p,novel_mir5614,novel_mir5543,novel_mir4479,novel_mir5084,novel_mir491,novel_mir1067,novel_mir1777,novel_mir1489,novel_mir4520,novel_mir2281,novel_mir2132,novel_mir127,novel_mir2211,mmu-miR-1247-5p,novel_mir609,mmu-miR-18a-3p,novel_mir251,novel_mir608,novel_mir1155,novel_mir341,novel_mir3507,novel_mir1338,novel_mir4189,novel_mir2441,mmu-miR-7…	6mer	NA	-24.32	147	Cldn4	GO:0005887,GO:0005923,GO:0016324,GO:0009925,GO:0016328,GO:0016327,GO:0005515,GO:0005198,GO:0032570,GO:0007623,GO:0007565,GO:0061436,	K06087|1|6.6e-116|422.2|mmu:12740|claudin	gi|6753440|ref|NP_034033.1|	8.60398e-151	claudin-4 [Mus musculus]
XM_006498242.3	novel_mir585,novel_mir1684,mmu-miR-365-2-5p,mmu-miR-324-3p,novel_mir3296,novel_mir4961,novel_mir994,novel_mir4194	6mer	NA	-21.85	156	Dph7	GO:0061685,GO:0017183,	K17868|1|2.1e-259|899.0|mmu:67228|diphthine methyl ester acylhydrolase [EC:3.1.1.97]	gi|568914113|ref|XP_006498304.1|	0	PREDICTED: diphthamide biosynthesis protein 7 isoform X1 [Mus musculus]
NM_177375.1	novel_mir3323,novel_mir262,novel_mir634,novel_mir2350,novel_mir2145,novel_mir4689,novel_mir4285,novel_mir3190,novel_mir6130,novel_mir356,novel_mir1656,novel_mir4257,novel_mir132,novel_mir6011,novel_mir5863,novel_mir4783,novel_mir6133,novel_mir1259,novel_mir2262,mmu-miR-365-2-5p,novel_mir4298,mmu-miR-370-3p,novel_mir238,novel_mir2438,novel_mir1585,novel_mir4535,novel_mir4584,novel_mir157,novel_mir…	6mer	NA	-22.76	158	Rab26	GO:0000139,GO:0030658,GO:0030667,GO:0031226,GO:0019002,GO:0005515,GO:0003924,GO:0005525,GO:0045055,GO:0007264,GO:0043001,GO:0017157,GO:0035272,	K07913|1|2.1e-146|523.1|mmu:328778|Ras-related protein Rab-26	gi|254939698|ref|NP_796349.1|	0	ras-related protein Rab-26 [Mus musculus]
NM_028384.1	novel_mir1959,novel_mir260,novel_mir5164,novel_mir2887,novel_mir4733,novel_mir1884,mmu-miR-7051-5p,novel_mir4685,novel_mir426,novel_mir3672,mmu-miR-149-5p,novel_mir3752,novel_mir2082,novel_mir2717,novel_mir1240,novel_mir556,novel_mir1860,novel_mir1229,novel_mir109,novel_mir1168,novel_mir3087,novel_mir5529,novel_mir623,novel_mir269,novel_mir4438,novel_mir440,novel_mir735,novel_mir2947,novel_mir360…	7mer-m8	NA	-26.34	150	Ccdc13	GO:0034451,GO:0042995,GO:0006974,GO:0031122,	K16808|1|3.9e-16|91.3|csem:103378564|nuclear mitotic apparatus protein 1!K10352|3|1.1e-15|89.7|aag:5570505|myosin heavy chain	gi|304555596|ref|NP_082660.1|	0	coiled-coil domain-containing protein 13 [Mus musculus]
NM_133246.5	novel_mir5997,novel_mir807,novel_mir233,novel_mir882,novel_mir2386,novel_mir1632,novel_mir635,novel_mir1488,novel_mir2192,novel_mir282,novel_mir308,novel_mir2079,novel_mir4174,novel_mir908,novel_mir4615,novel_mir359,novel_mir4549,novel_mir1333,novel_mir3546,novel_mir3068,novel_mir3606,novel_mir4910,novel_mir3564,novel_mir590,novel_mir1775	6mer	NA	-21.82	151	Ms4a3	GO:0016021,GO:0005737,GO:0005515,GO:0051726,	K22190|1|4.3e-117|425.2|mmu:170813|membrane-spanning 4-domains subfamily A member 3/4/8/12/15/18	gi|18875420|ref|NP_573509.1|	4.10533e-154	membrane-spanning 4-domains subfamily A member 3 [Mus musculus]
NM_172476.4	novel_mir4526,novel_mir5337,novel_mir374,novel_mir3623,novel_mir4403,novel_mir1649,novel_mir3099,novel_mir5503,novel_mir3167,novel_mir3521,novel_mir6135,novel_mir6011,novel_mir683,novel_mir1694,novel_mir3091,novel_mir2355,novel_mir224,novel_mir455,novel_mir4689,novel_mir4744,novel_mir4743,novel_mir955,novel_mir294,novel_mir4347,novel_mir3159,novel_mir509,novel_mir3562,novel_mir679,novel_mir315,mm…	7mer-1a	NA	-26.84	160	Tmc7	GO:0016021,GO:0006811,	K21988|1|0.0e+00|1445.3|mmu:209760|transmembrane channel-like protein	gi|31542282|ref|NP_766064.2|	0	transmembrane channel-like protein 7 [Mus musculus]
NM_153559.3	mmu-miR-328-3p,novel_mir354,novel_mir5135,novel_mir2526,novel_mir855,novel_mir140,novel_mir5318,novel_mir552,novel_mir788,novel_mir3880,novel_mir5970,novel_mir2147,novel_mir4529,novel_mir524,novel_mir1748,novel_mir406,novel_mir913,novel_mir696,novel_mir760,novel_mir182,novel_mir1817,novel_mir324,novel_mir2563,novel_mir1975,novel_mir1626,novel_mir4645,novel_mir725,novel_mir1565,novel_mir4083,novel…	6mer	NA	-26.19	157	Qsox2	GO:0005615,GO:0030173,GO:0016971,GO:0003756,GO:0006457,GO:0045454,GO:0055114,	K10758|1|0.0e+00|1131.3|rno:681023|thiol oxidase [EC:1.8.3.2]	gi|23956334|ref|NP_705787.1|	0	sulfhydryl oxidase 2 isoform 2 precursor [Mus musculus]
NM_080471.3	novel_mir6106,novel_mir1877,novel_mir112,novel_mir832,novel_mir4580,novel_mir282,mmu-miR-27b-3p,novel_mir4021,novel_mir5337,novel_mir73,novel_mir13,novel_mir2145,novel_mir455,novel_mir46,novel_mir4453,novel_mir4016,novel_mir4509,novel_mir4736,novel_mir5362,novel_mir3212,novel_mir1223,novel_mir2639,novel_mir3091,mmu-miR-378d,novel_mir2837,novel_mir3521,novel_mir3155,novel_mir2550,novel_mir3956,nov…	6mer	NA	-30.82	154	Ankrd6	GO:0005737,GO:0005634,GO:0005515,GO:2000096,GO:0090090,GO:0046330,	K21435|1|0.0e+00|1409.4|mmu:140577|ankyrin repeat domain-containing protein 6	gi|19924302|ref|NP_536719.2|	0	ankyrin repeat domain-containing protein 6 [Mus musculus]
NM_133758.3	novel_mir4689,novel_mir3414,novel_mir4501,novel_mir2350,novel_mir4478,novel_mir4744,novel_mir2145,novel_mir1365,novel_mir3765,novel_mir3521,novel_mir1326,novel_mir2262,novel_mir1916,novel_mir3731,novel_mir771,novel_mir4488,novel_mir4155,novel_mir442,novel_mir1876,novel_mir685,novel_mir308,mmu-miR-34a-5p,novel_mir4562,novel_mir4136,novel_mir774,novel_mir4269,novel_mir2477,novel_mir4211,novel_mir75…	6mer	NA	-23.62	160	Usp47	GO:0005737,GO:0019005,GO:0005634,GO:0071987,GO:0004843,GO:0030307,GO:1902230,GO:0006511,GO:0045892,GO:0043154,GO:0035520,GO:0006284,GO:0042493,GO:0034644,GO:0010972,	K11857|1|0.0e+00|2719.5|mmu:74996|ubiquitin carboxyl-terminal hydrolase 47 [EC:3.4.19.12]	gi|48928014|ref|NP_598519.2|	0	ubiquitin carboxyl-terminal hydrolase 47 isoform 2 [Mus musculus]
NM_133212.3	novel_mir6104,novel_mir2326,novel_mir3546,novel_mir2064,novel_mir2872,novel_mir902,novel_mir6088,novel_mir1953,novel_mir4179,novel_mir3660,novel_mir1490,novel_mir4225,novel_mir5773,novel_mir4607,novel_mir2744,novel_mir5646,novel_mir1197,novel_mir5183,novel_mir1452,novel_mir5414,novel_mir5627,novel_mir5957,novel_mir2838,novel_mir1131,novel_mir460,novel_mir2910,novel_mir5007,novel_mir2944,novel_mir…	6mer	NA	-25.21	154	Tlr8	GO:0005622,GO:0016021,GO:0005515,GO:0008144,GO:0003727,GO:0003677,GO:0003725,GO:0045356,GO:0001774,GO:0051607,GO:0045416,GO:0071260,GO:0001932,GO:0006954,GO:0034158,GO:0002755,GO:0050707,GO:0045359,GO:0007249,GO:0045078,	K10170|1|0.0e+00|2094.3|mmu:170744|toll-like receptor 8	gi|924181709|ref|NP_001300689.1|	0	toll-like receptor 8 isoform 2 precursor [Mus musculus]
NM_008052.3	novel_mir569,mmu-miR-702-3p,novel_mir1943,novel_mir4918,novel_mir423,novel_mir4262,novel_mir2236,novel_mir124,novel_mir2232,novel_mir895,novel_mir1213,novel_mir4247,novel_mir3698,novel_mir2143,novel_mir4564,novel_mir4077,novel_mir4111,novel_mir3263,novel_mir6118,novel_mir134,novel_mir633,novel_mir5761,novel_mir5924,novel_mir5609,novel_mir5237,novel_mir4897,novel_mir5431,novel_mir2215,novel_mir517…	6mer	NA	-21.19	144	Dtx1	GO:0005737,GO:0005634,GO:0008270,GO:0070740,GO:0043773,GO:0043774,GO:0008766,GO:0031625,GO:0070736,GO:0070738,GO:0018169,GO:0005112,GO:0070737,GO:0017124,GO:0008593,GO:0010001,GO:0045581,GO:0045665,	K06058|1|0.0e+00|1316.2|mmu:14357|deltex [EC:2.3.2.27]	gi|755513510|ref|XP_011246482.1|	0	PREDICTED: E3 ubiquitin-protein ligase DTX1 isoform X1 [Mus musculus]
NM_007655.3	novel_mir903,novel_mir3442,novel_mir1213,novel_mir585,novel_mir1943,novel_mir5272,novel_mir1380,novel_mir508,novel_mir1946,novel_mir1096,novel_mir1537,novel_mir1855,novel_mir755,novel_mir1458,novel_mir4423,novel_mir5491,novel_mir274,novel_mir3255,novel_mir5382,novel_mir134,novel_mir115,novel_mir837,novel_mir1130,novel_mir2398,novel_mir1381,novel_mir186,novel_mir3609,novel_mir5706,novel_mir440,nov…	6mer	NA	-20.44	155	Cd79a	GO:0019815,GO:0009897,GO:0005771,GO:0005887,GO:0045121,GO:0004888,GO:0005515,GO:0050853,GO:0030183,GO:0002250,GO:0042100,	K06506|1|5.8e-130|468.4|mmu:12518|CD79A antigen	gi|75677429|ref|NP_031681.2|	3.97477e-161	B-cell antigen receptor complex-associated protein alpha chain precursor [Mus musculus]
NM_198166.3	novel_mir1610,novel_mir5461,novel_mir4050,novel_mir2238,novel_mir2366,novel_mir5130,novel_mir2306,novel_mir3494,novel_mir4071,novel_mir6150,novel_mir2430,novel_mir429,novel_mir365,novel_mir2192,novel_mir3263,novel_mir455,mmu-miR-199a-5p,novel_mir1304,novel_mir5382,novel_mir5294,novel_mir4502,novel_mir1128,novel_mir507,mmu-miR-130b-3p,novel_mir4520,novel_mir1245,novel_mir4978,novel_mir4242	7mer-m8	NA	-25.41	161	Uts2b	GO:0005576,GO:0005179,GO:0001664,GO:0008217,	K05248|1|2.7e-40|169.9|rno:378939|urotensin 2	gi|37718974|ref|NP_937809.1|	2.92507e-79	urotensin-2B precursor [Mus musculus]
NM_007805.4	novel_mir1451,novel_mir3606,novel_mir909,novel_mir2511,novel_mir546,novel_mir939,novel_mir450,novel_mir2305,novel_mir5105,novel_mir5236,novel_mir2324,novel_mir2079,novel_mir713,novel_mir2960,novel_mir3076,mmu-miR-370-3p,novel_mir787,novel_mir4268,novel_mir5812,novel_mir653,novel_mir68,novel_mir2272,novel_mir2583,novel_mir333,novel_mir2522,mmu-miR-322-5p,novel_mir3801,mmu-miR-18a-3p,novel_mir1997,…	7mer-m8	NA	-24.83	151	Cyb561	GO:0016021,GO:0031410,GO:0046872,GO:0000293,GO:0022865,GO:0055085,GO:0022900,	K08360|1|1.2e-139|501.5|mmu:13056|cytochrome b-561 [EC:7.2.1.3]	gi|31542436|ref|NP_031831.2|	0	cytochrome b561 [Mus musculus]
NM_145479.4	novel_mir898,novel_mir4744,novel_mir1486,novel_mir2724,novel_mir1589,novel_mir1110,novel_mir4990,novel_mir4453,novel_mir4239,novel_mir5251,novel_mir4242,novel_mir5163,novel_mir1741,novel_mir2990,novel_mir3387,novel_mir327,novel_mir1365,novel_mir2394,novel_mir2942,mmu-miR-296-5p,novel_mir3972,novel_mir2163,novel_mir832,novel_mir4706,novel_mir1399,novel_mir1133,novel_mir1649,novel_mir159,novel_mir3…	6mer	NA	-23.5	145	Klhl22	GO:0005827,GO:0072686,GO:0031463,GO:0005813,GO:0005737,GO:0005827,GO:0072686,GO:0031463,GO:0005813,GO:0005737,GO:0004842,GO:0004842,GO:0007094,GO:0006513,GO:0051301,GO:0007094,GO:0006513,GO:0051301,	K10459|1|0.0e+00|1308.5|mmu:224023|kelch-like protein 22	gi|568995143|ref|XP_006522102.1|	0	PREDICTED: kelch-like protein 22 isoform X1 [Mus musculus]
NM_001042714.1	novel_mir3962,novel_mir879,novel_mir197,novel_mir1582,novel_mir5080,novel_mir585,novel_mir4588,novel_mir4672,novel_mir1537,novel_mir4220,novel_mir3936,novel_mir3698,novel_mir1374,novel_mir2773,novel_mir5382,novel_mir4111,novel_mir1684,novel_mir5431,novel_mir6046,novel_mir5194,novel_mir2538,novel_mir2398,novel_mir591,novel_mir3753,novel_mir4045,novel_mir2519,novel_mir3804,novel_mir2442,novel_mir31…	7mer-m8	NA	-21.73	146	Ankdd1b	-	K03511|1|2.1e-165|587.4|cpic:101932662|DNA polymerase kappa [EC:2.7.7.7]!K14686|3|8.9e-79|299.7|cin:100185625|solute carrier family 31 (copper transporter), member 1!K10380|4|1.6e-40|172.6|pdam:113672012|ankyrin	gi|568984535|ref|XP_006517745.1|	0	PREDICTED: ankyrin repeat and death domain-containing protein 1B isoform X2 [Mus musculus]
NM_010889.1	novel_mir3069,novel_mir1727,novel_mir1323,novel_mir5537,novel_mir5357,novel_mir4282,novel_mir1253,novel_mir2047,novel_mir1930,novel_mir5961,novel_mir2313,novel_mir420,novel_mir479,novel_mir3081,novel_mir4412,mmu-miR-5116,novel_mir439,novel_mir1542,novel_mir4431,novel_mir2130,novel_mir3363,mmu-miR-1298-5p,novel_mir4056,novel_mir285,novel_mir1648,novel_mir4311,novel_mir902,novel_mir5292,novel_mir50…	7mer-1a	NA	-63.99	472	Neb	-	K18267|1|0.0e+00|14520.9|mmu:17996|nebulin	gi|568913135|ref|XP_006497839.1|	0	PREDICTED: nebulin isoform X26 [Mus musculus]
NM_013933.3	novel_mir2805,novel_mir559,novel_mir122,novel_mir517,novel_mir4009,novel_mir3218,novel_mir5182,novel_mir3576,novel_mir1440,novel_mir2396,novel_mir5149,novel_mir1746,novel_mir1656,novel_mir3672,mmu-miR-101a-3p,novel_mir5764,novel_mir3352,novel_mir3862,novel_mir1803,novel_mir1651,novel_mir105,novel_mir3015,novel_mir5234,novel_mir1639,novel_mir215,novel_mir2514,mmu-miR-1981-5p,novel_mir1027,mmu-miR-…	6mer	NA	-27.28	163	Vapa	-	K06096|1|4.5e-140|502.3|mmu:30960|vesicle-associated membrane protein-associated protein A	gi|569000519|ref|XP_006524448.1|	0	PREDICTED: vesicle-associated membrane protein-associated protein A isoform X1 [Mus musculus]
XM_011249545.2	novel_mir1002,novel_mir4331,novel_mir1222,novel_mir5770,novel_mir997,novel_mir4854,novel_mir801,novel_mir3231,novel_mir3471,novel_mir2464,novel_mir4769,novel_mir1058,novel_mir5596,novel_mir3673,novel_mir3269,novel_mir354,novel_mir2615,mmu-miR-874-3p,novel_mir658,novel_mir4461,mmu-miR-93-5p,novel_mir759,novel_mir3167,novel_mir5807,novel_mir4607,novel_mir4508,novel_mir5062,mmu-miR-6971-3p,novel_mir…	7mer-m8	NA	-30.43	158	Pus1	GO:0005739,GO:0005730,GO:0000790,GO:0005667,GO:0030374,GO:0080011,GO:0042299,GO:0042300,GO:0005515,GO:0009982,GO:0034784,GO:0034951,GO:0045944,GO:0031119,	K06173|1|2.1e-235|818.9|mmu:56361|tRNA pseudouridine38-40 synthase [EC:5.4.99.12]	gi|568936065|ref|XP_006535212.1|	0	PREDICTED: tRNA pseudouridine synthase A, mitochondrial isoform X4 [Mus musculus]
NM_153521.2	novel_mir5337,novel_mir2535,novel_mir477,novel_mir1649,novel_mir631,novel_mir4186,novel_mir1259,novel_mir1194,novel_mir170,novel_mir654,novel_mir2941,novel_mir4712,novel_mir3579,novel_mir4741,novel_mir5695,novel_mir3387,novel_mir1204,mmu-miR-378d,novel_mir4996,novel_mir2470,novel_mir2936,mmu-miR-92a-1-5p,novel_mir683,novel_mir2364,novel_mir6004,novel_mir729,novel_mir1924,novel_mir4736,novel_mir45…	7mer-m8	NA	-28.01	167	Lrrc41	GO:0016020,GO:0005737,GO:0005634,GO:0042803,GO:0016567,	K10347|1|0.0e+00|1593.9|mmu:230654|leucine-rich repeat-containing protein 41	gi|819231695|ref|NP_705741.3|	0	leucine-rich repeat-containing protein 41 [Mus musculus]
NM_028440.1	novel_mir1649,novel_mir3902,novel_mir5584,novel_mir5508,novel_mir5437,novel_mir4908,mmu-miR-7051-5p,novel_mir5414,novel_mir1365,novel_mir1314,mmu-miR-181d-5p,novel_mir4489,novel_mir511,novel_mir2444,novel_mir4539,mmu-miR-215-3p,novel_mir2261,novel_mir2249,mmu-miR-181b-5p	8mer-1a	NA	-23.36	150	Abracl	-	-	gi|148671526|gb|EDL03473.1|	1.39245e-51	mCG7517, isoform CRA_c, partial [Mus musculus]
NM_029571.2	novel_mir622,novel_mir465,novel_mir429,mmu-miR-27a-3p,mmu-miR-34c-5p,novel_mir636,novel_mir5806,novel_mir2550,novel_mir439,novel_mir1875,novel_mir2185,novel_mir4249,novel_mir901,novel_mir808,novel_mir1245,novel_mir2932,novel_mir4520,novel_mir4282,mmu-miR-3057-5p,novel_mir1264,novel_mir1253,novel_mir1787,novel_mir131,mmu-miR-485-5p,novel_mir1304,novel_mir45,novel_mir2227,novel_mir2043,novel_mir655…	6mer	NA	-20.99	161	Kti12	GO:0005524,	K15456|1|6.5e-197|691.0|mmu:100087|protein KTI12	gi|20270210|ref|NP_083847.1|	0	protein KTI12 homolog [Mus musculus]
NM_134437.3	novel_mir1570,novel_mir284,novel_mir5838,novel_mir1316,novel_mir3313,novel_mir5939,novel_mir2275,novel_mir308,novel_mir685,novel_mir5281,mmu-miR-485-5p,novel_mir3385,novel_mir3412,novel_mir4133,novel_mir4211,novel_mir12,novel_mir1882,mmu-miR-125a-5p,novel_mir2032,mmu-miR-709,novel_mir1966,novel_mir1621,novel_mir3155,novel_mir1720,novel_mir661,mmu-miR-200b-5p,novel_mir5920,novel_mir315,novel_mir38…	6mer	NA	-21.98	161	Il17rd	GO:0005887,GO:0005654,GO:0005794,GO:0046872,GO:0030368,	K05167|1|0.0e+00|1520.8|mmu:171463|interleukin 17 receptor D	gi|568986950|ref|XP_006518730.1|	0	PREDICTED: interleukin-17 receptor D isoform X1 [Mus musculus]
NM_146067.3	novel_mir124,novel_mir3483,novel_mir2232,novel_mir2702,novel_mir4017,novel_mir4918,novel_mir403,novel_mir5272,novel_mir1738,novel_mir1380,novel_mir494,novel_mir1439,novel_mir1878,novel_mir4791,novel_mir4077,novel_mir1798,novel_mir134,novel_mir1712,novel_mir847,novel_mir5194,novel_mir503,novel_mir5701,novel_mir177,novel_mir7,novel_mir1150,novel_mir2972,novel_mir5127,mmu-miR-320-3p,novel_mir1359,no…	7mer-m8	NA	-20.7	146	Cpped1	GO:0070062,GO:0005737,GO:0005886,GO:0004721,GO:0046872,	K21814|1|1.6e-182|644.0|mmu:223978|serine/threonine-protein phosphatase CPPED1 [EC:3.1.3.16]	gi|568995083|ref|XP_006522076.1|	0	PREDICTED: serine/threonine-protein phosphatase CPPED1 isoform X1 [Mus musculus]
NM_008009.4	novel_mir1744,novel_mir1519,novel_mir310,novel_mir561,novel_mir2143,novel_mir3141,novel_mir3353,novel_mir1960,novel_mir1077,novel_mir300,novel_mir2275,novel_mir2370,novel_mir5721,novel_mir975,novel_mir1536,novel_mir946,novel_mir4462,novel_mir5961,novel_mir1862,novel_mir4822,novel_mir4864,novel_mir3242,novel_mir3497,novel_mir2194,novel_mir578,mmu-miR-500-3p,novel_mir4179,novel_mir3695,novel_mir919…	7mer-m8	NA	-21.71	147	Fgfbp1	GO:0009986,GO:0005576,GO:0005886,GO:0017134,GO:0007267,GO:0098792,GO:0045743,GO:0098779,GO:0008284,GO:0002230,	-	gi|47132512|ref|NP_032035.2|	0	fibroblast growth factor-binding protein 1 precursor [Mus musculus]
NM_028022.1	mmu-miR-188-5p,novel_mir939,novel_mir546,novel_mir6124,novel_mir5681,novel_mir59,novel_mir2447,novel_mir3280,novel_mir909,novel_mir713,novel_mir2079,novel_mir1294,novel_mir6139,novel_mir1128,novel_mir521,novel_mir199,novel_mir4194,novel_mir1814,novel_mir2194,mmu-miR-484,novel_mir2426,novel_mir365,mmu-miR-3473b,novel_mir4023,novel_mir1010,novel_mir4067,mmu-miR-540-3p,novel_mir1922,novel_mir1287,no…	7mer-m8	NA	-23.48	147	Gatsl3	GO:0005829,GO:0061700,GO:0042802,GO:0034618,GO:1904262,GO:1903577,	K23080|1|3.2e-188|662.1|mmu:71962|cytosolic arginine sensor for mTORC1 subunit 1	gi|755536551|ref|XP_011242054.1|	0	PREDICTED: GATS-like protein 3 isoform X1 [Mus musculus]
NM_172666.3	novel_mir3323,mmu-miR-337-3p,novel_mir898,novel_mir700,novel_mir1656,novel_mir5163,novel_mir1752,novel_mir884,novel_mir3873,novel_mir1073,novel_mir1478,novel_mir1482,novel_mir4804,novel_mir4741,novel_mir5472,novel_mir759,novel_mir1473,novel_mir6043,novel_mir2501,novel_mir5277,novel_mir873,novel_mir1649,novel_mir656,novel_mir1793,novel_mir4521,novel_mir1769,mmu-miR-134-5p,novel_mir3989,novel_mir52…	6mer	NA	-26.77	157	Agps	GO:0005739,GO:0005730,GO:0005778,GO:0016614,GO:0008609,GO:0071949,GO:0008611,GO:0055114,	K00803|1|0.0e+00|1359.7|mmu:228061|alkyldihydroxyacetonephosphate synthase [EC:2.5.1.26]	gi|295444834|ref|NP_766254.2|	0	alkyldihydroxyacetonephosphate synthase, peroxisomal [Mus musculus]
NM_025593.1	novel_mir723,novel_mir2466,novel_mir1615,novel_mir2256,novel_mir2371,novel_mir691,novel_mir4361,novel_mir3416,novel_mir4413,novel_mir6104,novel_mir3340,novel_mir1565,novel_mir1211,novel_mir780,novel_mir862,novel_mir1094,novel_mir395,novel_mir1857,novel_mir1626,novel_mir4900,novel_mir836,novel_mir259,novel_mir2303,novel_mir5692,novel_mir686,novel_mir5257,mmu-miR-362-3p,novel_mir388,novel_mir183,no…	7mer-m8	NA	-22.03	152	Polr2l	-	K03007|1|4.9e-33|146.7|ccw:104689917|DNA-directed RNA polymerases I, II, and III subunit RPABC5	gi|33086454|gb|AAP92539.1|	1.24736e-43	Ab1-108 [Rattus norvegicus]
NM_199301.2	novel_mir627,novel_mir318,novel_mir2379,novel_mir4291,novel_mir5614,novel_mir4479,novel_mir4570,novel_mir1844,novel_mir1402,novel_mir4961,novel_mir1891,novel_mir2366,mmu-miR-298-5p,novel_mir1348,novel_mir1082,novel_mir166,novel_mir1025,novel_mir3054,novel_mir3507,novel_mir127,novel_mir1856,novel_mir5478,novel_mir5825,novel_mir233,novel_mir4677,novel_mir1010,novel_mir3429,novel_mir2140,novel_mir30…	6mer	NA	-25.21	151	Mtg1	GO:0005743,GO:0005761,GO:0003924,GO:0005525,GO:0070129,GO:0044065,GO:0042254,	K19828|1|7.3e-188|661.0|mmu:212508|mitochondrial GTPase 1	gi|188528646|ref|NP_955005.2|	0	mitochondrial ribosome-associated GTPase 1 [Mus musculus]
NM_178420.3	novel_mir267,novel_mir5807,mmu-miR-486b-3p,novel_mir365,mmu-miR-15b-5p,novel_mir98,novel_mir5100,novel_mir495,novel_mir4181,novel_mir1128,novel_mir172,novel_mir2305,novel_mir6124,novel_mir869,novel_mir5681,novel_mir59,novel_mir3251,novel_mir677,novel_mir4796,novel_mir764,novel_mir4479,novel_mir4958,novel_mir1489,novel_mir1691,novel_mir6150,novel_mir1216,novel_mir970,novel_mir2311,novel_mir1119,no…	6mer	NA	-28.01	151	Nlrx1	GO:0005741,GO:0005515,GO:0005524,GO:0050728,GO:0045824,GO:0032688,GO:0043124,GO:0039536,GO:0032715,	K12653|1|0.0e+00|1951.0|mmu:270151|NLR family member X1	gi|255522931|ref|NP_848507.2|	0	NLR family member X1 [Mus musculus]
NM_011662.2	novel_mir97,novel_mir4705,novel_mir5731,novel_mir5523,novel_mir3880,novel_mir1004,novel_mir5461,mmu-miR-127-3p,novel_mir475,novel_mir1463,novel_mir1855,novel_mir230,novel_mir214,novel_mir3974,novel_mir1719,novel_mir5382,novel_mir4726,novel_mir3473,novel_mir3263,novel_mir4476,novel_mir1787,novel_mir3688,novel_mir659,novel_mir4598,novel_mir2306,novel_mir656,novel_mir1769,novel_mir3044,novel_mir5804…	8mer-1a	NA	-24.75	155	Tyrobp	GO:0016021,GO:0005622,GO:0009986,GO:0042802,GO:0005102,GO:0005057,GO:0035556,GO:2001204,GO:0007229,GO:0002283,GO:0002281,	K07992|1|1.5e-58|229.9|mmu:22177|TYRO protein tyrosine kinase binding protein	gi|6755915|ref|NP_035792.1|	2.48892e-77	TYRO protein tyrosine kinase-binding protein precursor [Mus musculus]
NM_153599.3	novel_mir712,novel_mir1605,novel_mir132,novel_mir2172,novel_mir1815,novel_mir3212,novel_mir1656,mmu-miR-92a-1-5p,novel_mir5943,novel_mir3288,novel_mir2100,novel_mir520,novel_mir2535,novel_mir4021,novel_mir2655,novel_mir5454,novel_mir282,novel_mir1354,novel_mir3376,novel_mir654,novel_mir832,novel_mir4804,novel_mir4183,novel_mir3972,novel_mir1632,novel_mir698,mmu-miR-193a-5p,novel_mir2521,novel_mir…	7mer-m8	NA	-28.74	159	Cdk8	-	K02208|1|1.2e-280|969.9|mmu:264064|cyclin-dependent kinase 8/11 [EC:2.7.11.22 2.7.11.23]	gi|568939026|ref|XP_006504902.1|	0	PREDICTED: cyclin-dependent kinase 8 isoform X4 [Mus musculus]
NM_015829.3	novel_mir1127,mmu-miR-505-5p,novel_mir5572,novel_mir4413,novel_mir177,novel_mir3696,novel_mir3804,novel_mir4004,novel_mir5706,novel_mir857,novel_mir269,novel_mir5057,novel_mir4576,novel_mir4991,novel_mir2082,novel_mir4749,novel_mir5412,novel_mir695,novel_mir3657,novel_mir5116,novel_mir2259,novel_mir5477,novel_mir4959,novel_mir4918,novel_mir77,novel_mir1188,novel_mir3820,novel_mir4620,novel_mir223…	6mer	NA	-24.7	145	Slc25a13	GO:0005743,GO:0016021,GO:0005509,GO:0005313,GO:0003735,GO:0015183,GO:0089712,GO:0006412,GO:0051592,GO:0043490,GO:0006754,GO:0089711,	K15105|1|0.0e+00|1338.9|mmu:50799|solute carrier family 25 (mitochondrial aspartate/glutamate transporter), member 12/13	gi|7657583|ref|NP_056644.1|	0	calcium-binding mitochondrial carrier protein Aralar2 isoform 1 [Mus musculus]
XM_011249014.2	novel_mir382,novel_mir4959,novel_mir1419,novel_mir2099,novel_mir2048,novel_mir6070,novel_mir3599,novel_mir2431,novel_mir3566,novel_mir1507,novel_mir5650,novel_mir5071,novel_mir5861,novel_mir2164,mmu-miR-150-5p,novel_mir791,novel_mir705,novel_mir782,novel_mir3416,novel_mir935,novel_mir813,novel_mir4411,novel_mir1696,novel_mir5594,novel_mir1203,novel_mir3575,novel_mir55,novel_mir3744,novel_mir4948,…	7mer-m8	NA	-20.57	154	Tlk2	GO:0005882,GO:0030054,GO:0048471,GO:0005634,GO:0004674,GO:0005524,GO:0006974,GO:0018105,GO:0032435,GO:0007059,GO:0071480,GO:0001672,GO:0035556,	K08864|1|0.0e+00|1446.0|hai:109380314|tousled-like kinase [EC:2.7.11.1]	gi|755538619|ref|XP_011247318.1|	0	PREDICTED: serine/threonine-protein kinase tousled-like 2 isoform X6 [Mus musculus]
XM_006529265.3	novel_mir1133,novel_mir5277,novel_mir4804,novel_mir4706,novel_mir1473,novel_mir1716,novel_mir4241,novel_mir4053,novel_mir4463,novel_mir884,novel_mir3533,novel_mir1019,novel_mir4163,mmu-miR-337-3p,novel_mir898,novel_mir3821,novel_mir4290,novel_mir2648,mmu-miR-1934-5p,novel_mir687,novel_mir3323,mmu-miR-15a-3p,novel_mir4485,novel_mir2865,novel_mir2720,novel_mir997,novel_mir3400,novel_mir227,mmu-miR-…	8mer-1a	NA	-21.83	141	Rgl1	GO:0008321,GO:0007264,	K17635|1|0.0e+00|1520.4|ngi:103726671|ral guanine nucleotide dissociation stimulator-like 1	gi|568908403|ref|XP_006529327.1|	0	PREDICTED: ral guanine nucleotide dissociation stimulator-like 1 isoform X1 [Mus musculus]
NM_028419.3	novel_mir2121,mmu-miR-1895,novel_mir4181,novel_mir2960,novel_mir2079,novel_mir4105,novel_mir116,novel_mir3628,mmu-miR-6914-3p,novel_mir4349,mmu-miR-3077-3p,novel_mir2480,novel_mir1632,novel_mir673,novel_mir4741,novel_mir43,mmu-miR-27a-5p,novel_mir3418,novel_mir2522,novel_mir4411,novel_mir4288,novel_mir4630,novel_mir3802,novel_mir1989,novel_mir1436,novel_mir282,novel_mir1649,novel_mir1544,novel_mi…	7mer-m8	NA	-28.4	149	Glrx5	GO:0030425,GO:0005759,GO:0005634,GO:0043025,GO:0046872,GO:0009055,GO:0051537,GO:0015035,GO:0045454,	K07390|1|3.8e-81|305.8|mmu:73046|monothiol glutaredoxin	gi|21312153|ref|NP_082695.1|	1.88063e-107	glutaredoxin-related protein 5, mitochondrial [Mus musculus]
NR_104356.1	novel_mir640,novel_mir1371,novel_mir2991,novel_mir4749,novel_mir5673,novel_mir2984,novel_mir300,mmu-miR-201-5p,novel_mir1019,novel_mir262,novel_mir561,novel_mir5215,novel_mir1133,novel_mir1257,novel_mir2199,novel_mir436,novel_mir233,novel_mir3233,novel_mir4380,novel_mir1195,novel_mir5949,novel_mir475	6mer	NA	-24.67	153	Chchd7	-	-	-	-	-
XM_006511546.2	novel_mir19,novel_mir6013,novel_mir1959,novel_mir4536,mmu-miR-1895,novel_mir4749,novel_mir463,novel_mir123,novel_mir2155,novel_mir1359,novel_mir4746,novel_mir5145,novel_mir503,novel_mir5242,novel_mir3281,novel_mir5078,novel_mir4318,novel_mir2558,novel_mir4435,novel_mir5984,novel_mir3624,novel_mir2612,novel_mir124,novel_mir553,novel_mir5972,novel_mir3740,novel_mir5310,novel_mir693,novel_mir1943,no…	6mer	NA	-22.03	157	Celf6	GO:0005737,GO:0005634,GO:0003723,GO:0000166,GO:0001505,GO:0071625,GO:0006397,	K13207|1|4.8e-197|693.0|mmu:76183|CUG-BP- and ETR3-like factor	gi|34784979|gb|AAH57083.1|	0	Brunol6 protein [Mus musculus]
NM_001039494.2	novel_mir1093,novel_mir5399,novel_mir5906,mmu-miR-672-5p,novel_mir4936,novel_mir1322,novel_mir6043,novel_mir902,novel_mir3890,novel_mir5300,novel_mir4399,novel_mir284	7mer-m8	NA	-24.54	146	Tex40	GO:0005887,GO:0005737,GO:0034705,GO:0022841,GO:0097604,GO:0098782,GO:0005244,GO:0050951,GO:0007283,GO:0030322,GO:0071260,GO:0071805,GO:0034765,GO:0071398,GO:0030154,GO:0007140,GO:0071469,GO:0019233,GO:0071502,GO:0050976,	K04915|1|1.9e-32|143.7|pale:102898989|potassium channel subfamily K member 4	gi|95772156|ref|NP_001034583.1|	2.34371e-142	testis-expressed sequence 40 protein [Mus musculus]
NM_172493.2	novel_mir166,novel_mir2441,novel_mir1464,novel_mir203,novel_mir3940,novel_mir3202,novel_mir2269,novel_mir1287,novel_mir348,novel_mir2211,novel_mir1662,novel_mir1489,novel_mir482,novel_mir5824,novel_mir2352,novel_mir158,novel_mir1290,novel_mir887,novel_mir2537,mmu-miR-330-3p,novel_mir1891,novel_mir1960,novel_mir6108,novel_mir95,novel_mir1691,novel_mir3635,novel_mir1411,novel_mir2359,novel_mir1661,…	6mer	NA	-48.78	313	Diaph2	GO:0003779,GO:0017048,GO:0007275,GO:0048477,GO:0030041,	K05741|1|0.0e+00|2201.8|mmu:54004|diaphanous 2	gi|42560525|sp|O70566.2|DIAP2_MOUSE	0	RecName: Full=Protein diaphanous homolog 2; AltName: Full=Diaphanous-related formin-2; Short=DRF2; Short=mDia3
NM_001168589.2	novel_mir3413,novel_mir604,novel_mir1180,novel_mir4822,novel_mir3574,novel_mir1927,novel_mir4607,novel_mir3012,novel_mir5185,novel_mir3609,novel_mir5529,novel_mir5338,novel_mir2371,novel_mir5024,novel_mir5296,novel_mir5853,novel_mir1615,novel_mir4649,mmu-miR-497a-5p,novel_mir2431,mmu-miR-503-5p,novel_mir971,novel_mir2971,novel_mir474,novel_mir2474,novel_mir366,novel_mir1261,novel_mir1377,novel_mi…	7mer-m8	NA	-22.01	144	Vrtn	-	-	gi|76253890|ref|NP_001028948.1|	0	vertnin [Mus musculus]
XM_006500730.2	novel_mir1752,novel_mir2699,novel_mir3627,novel_mir520,novel_mir2438,novel_mir3376,novel_mir1259,novel_mir3640,novel_mir664,novel_mir771,novel_mir1468,novel_mir5503,novel_mir1809,novel_mir3421,novel_mir1314,mmu-miR-125a-5p,novel_mir2016,mmu-miR-125b-5p,novel_mir171,novel_mir168,mmu-miR-30c-2-3p,novel_mir1772,novel_mir4661,novel_mir5982,mmu-miR-485-5p,mmu-miR-3470b,novel_mir1770,novel_mir4159,nove…	6mer	NA	-22.34	146	Phactr3	GO:0005654,GO:0003779,GO:0004864,GO:0008157,	K17594|1|6.3e-298|1027.3|mmu:74189|phosphatase and actin regulator 3	gi|55741467|ref|NP_083082.1|	0	phosphatase and actin regulator 3 isoform 1 [Mus musculus]
NM_138589.2	novel_mir4161,novel_mir140,mmu-miR-30c-1-3p,novel_mir2638,novel_mir5067,novel_mir1053,novel_mir552,novel_mir4566,novel_mir460,novel_mir2827,novel_mir371,novel_mir3034,novel_mir676,novel_mir1857,novel_mir761,novel_mir4738,novel_mir3707,novel_mir275,novel_mir819,mmu-miR-505-5p,novel_mir4413,novel_mir5974,novel_mir370,novel_mir6151,novel_mir4225,novel_mir5071,novel_mir825,novel_mir369,novel_mir4093,…	6mer	NA	-26.04	158	Ubfd1	-	-	gi|564330833|ref|XP_006230251.1|	0	PREDICTED: ubiquitin domain-containing protein UBFD1 isoform X1 [Rattus norvegicus]
NM_025596.5	novel_mir532,novel_mir755,novel_mir1072,novel_mir1004,novel_mir2207,novel_mir882,novel_mir3682,novel_mir1596,novel_mir979,novel_mir926,novel_mir5692,novel_mir131,novel_mir494,novel_mir5382,novel_mir4111,novel_mir4649,novel_mir2781,novel_mir918,novel_mir1838,novel_mir2158,novel_mir7,novel_mir4630,mmu-miR-3102-5p.2-5p,novel_mir1588,novel_mir3646,novel_mir2026,novel_mir1765,mmu-miR-345-5p,novel_mir4…	7mer-m8	NA	-24.72	158	Prelid1	GO:0005654,GO:0005758,GO:0043234,GO:1990050,GO:0097035,GO:1901857,GO:2001140,GO:0070234,GO:0010917,GO:0045580,GO:0010950,GO:0090201,	-	gi|46518501|ref|NP_079872.4|	3.59039e-162	PRELI domain-containing protein 1, mitochondrial precursor [Mus musculus]
NM_001080389.2	novel_mir711,novel_mir691,novel_mir831,novel_mir4616,novel_mir705,novel_mir3012,novel_mir513,mmu-miR-6971-3p,mmu-miR-1198-5p,novel_mir4550,novel_mir2001,novel_mir2307,novel_mir4697,novel_mir2250,novel_mir902,novel_mir2653,novel_mir4203,novel_mir5107,novel_mir1766,novel_mir3848,novel_mir1648,novel_mir530,novel_mir169,novel_mir382,novel_mir2748,novel_mir3511,novel_mir261,novel_mir65,novel_mir416,no…	6mer	NA	-26.84	157	Mark2	-	K08798|1|0.0e+00|1425.6|ptr:741494|MAP/microtubule affinity-regulating kinase [EC:2.7.11.1]	gi|122937359|ref|NP_031954.2|	0	serine/threonine-protein kinase MARK2 isoform 1 [Mus musculus]
NM_008923.3	novel_mir333,novel_mir3858,novel_mir2965,novel_mir2424,novel_mir4268,novel_mir215,novel_mir4181,novel_mir521,novel_mir5599,novel_mir3635,novel_mir3284,novel_mir3372,novel_mir713,novel_mir2447,novel_mir2760,novel_mir5681,novel_mir6124,novel_mir546,novel_mir939,novel_mir1517,novel_mir3948,novel_mir2352,novel_mir4297,novel_mir5356,novel_mir1119,novel_mir599,novel_mir2918,novel_mir2441,novel_mir2465,…	6mer	NA	-20.27	150	Prkar1b	GO:0005737,GO:0005952,GO:0005886,GO:0034236,GO:0030552,GO:0004862,GO:0008603,GO:0007611,GO:0009887,GO:2000480,GO:0008283,	K04739|1|3.5e-219|765.8|mmu:19085|cAMP-dependent protein kinase regulator	gi|254675178|ref|NP_032949.3|	0	cAMP-dependent protein kinase type I-beta regulatory subunit [Mus musculus]
NM_001033207.3	novel_mir3296,novel_mir3413,novel_mir2215,novel_mir177,novel_mir4822,novel_mir4316,mmu-let-7b-5p,novel_mir1193,novel_mir1715,novel_mir1647,novel_mir1168,mmu-miR-214-3p,novel_mir1838,novel_mir3052,novel_mir1794,novel_mir101,novel_mir3872,novel_mir5127,novel_mir4477,mmu-miR-204-3p,novel_mir3714,novel_mir5741,novel_mir4311,novel_mir1450,novel_mir752,novel_mir5557,novel_mir896,novel_mir2060,novel_mir…	6mer	NA	-24.84	153	Nlrc5	-	K22615|1|0.0e+00|3819.6|mmu:434341|NLR family CARD domain containing 5	gi|568957139|ref|XP_006531228.1|	0	PREDICTED: protein NLRC5 isoform X3 [Mus musculus]
NM_176980.4	novel_mir5317,novel_mir679,novel_mir2009,novel_mir5452,novel_mir2641,novel_mir1720,novel_mir294,novel_mir2287,novel_mir2853,novel_mir2865,novel_mir1566,novel_mir3778,mmu-miR-16-2-3p,novel_mir5281,novel_mir2897,novel_mir820,novel_mir408,novel_mir5755,novel_mir1787,novel_mir946,mmu-let-7f-5p,novel_mir1536,novel_mir152,novel_mir4089,novel_mir2521,novel_mir2869,novel_mir4211,novel_mir875,novel_mir226…	6mer	NA	-26.35	154	Ankar	GO:0005634,GO:0016021,GO:0005737,	K15502|1|2.3e-08|66.2|hmg:100215811|serine/threonine-protein phosphatase 6 regulatory ankyrin repeat subunit A!K10380|3|2.3e-08|66.2|rss:109461062|ankyrin	gi|568906526|ref|XP_006496123.1|	0	PREDICTED: ankyrin and armadillo repeat-containing protein isoform X2 [Mus musculus]
XM_006533683.3	novel_mir171,novel_mir325,novel_mir758,novel_mir768,novel_mir4284,novel_mir989,mmu-miR-34a-5p,novel_mir2527,novel_mir2703,novel_mir358,novel_mir801,novel_mir3326,novel_mir718,novel_mir984,novel_mir1401,novel_mir82,mmu-miR-29b-3p,novel_mir660,novel_mir3627,novel_mir3739,novel_mir1378,novel_mir2293,novel_mir3218,novel_mir2957,novel_mir1365,novel_mir726,novel_mir84,novel_mir2365,novel_mir262,mmu-miR…	8mer-1a	NA	-73.77	450	Mpp2	GO:0030165,	K06103|1|2.8e-114|417.9|asn:102369775|calcium/calmodulin-dependent serine protein kinase [EC:2.7.11.1]	gi|568974714|ref|XP_006533746.1|	0	PREDICTED: MAGUK p55 subfamily member 2 isoform X2 [Mus musculus]
NM_027708.1	mmu-miR-6418-3p,novel_mir1030,novel_mir5135,novel_mir3179,novel_mir1370,novel_mir1452,novel_mir5318,novel_mir1835,novel_mir4282,mmu-miR-205-5p,novel_mir3081,novel_mir3245,novel_mir5595,novel_mir2733,novel_mir2127,novel_mir4954,novel_mir5519,novel_mir4101,novel_mir862,novel_mir2431,novel_mir2624,novel_mir2835,mmu-miR-434-5p,novel_mir3537,novel_mir247,novel_mir319,novel_mir1995,novel_mir3546,novel_…	7mer-m8	NA	-24.4	153	Fbxo24	-	K10304|1|0.0e+00|1217.6|mmu:71176|F-box protein 24	gi|254553394|ref|NP_081984.1|	0	F-box only protein 24 [Mus musculus]
NM_029364.3	novel_mir2126,novel_mir644,mmu-miR-298-5p,novel_mir3916,novel_mir1690,novel_mir390,novel_mir1198,mmu-miR-423-3p,novel_mir280,novel_mir4968,novel_mir4380,novel_mir2704,novel_mir1968,novel_mir4204,novel_mir1108,novel_mir4823,novel_mir125,novel_mir944,novel_mir127,novel_mir4520,novel_mir1771,novel_mir387,novel_mir859,novel_mir3507,novel_mir202,novel_mir1037,novel_mir500,novel_mir1184,novel_mir5313,n…	6mer	NA	-41.97	304	Gns	GO:0005764,GO:0070062,GO:0046872,GO:0008449,GO:0043199,GO:0005539,GO:0030203,	K01137|1|0.0e+00|1131.7|mmu:75612|N-acetylglucosamine-6-sulfatase [EC:3.1.6.14]	gi|148692470|gb|EDL24417.1|	0	glucosamine (N-acetyl)-6-sulfatase, isoform CRA_b, partial [Mus musculus]
NM_010880.3	novel_mir3671,novel_mir2757,novel_mir4105,novel_mir1637,novel_mir2699,novel_mir1393,novel_mir5748,novel_mir46,novel_mir90,novel_mir2431,novel_mir3388,novel_mir3528,novel_mir902,mmu-miR-215-3p,novel_mir1814,novel_mir1168,novel_mir2194,novel_mir2309,novel_mir414,novel_mir3281,novel_mir2694,novel_mir4616,novel_mir4,novel_mir1787,novel_mir5798,novel_mir126,novel_mir5838,mmu-miR-7058-5p,novel_mir2441,…	6mer	NA	-24.77	143	Ncl	GO:0001650,GO:0005654,GO:0016020,GO:0001651,GO:0009986,GO:0036464,GO:0070062,GO:0005938,GO:0042393,GO:0043236,GO:0008022,GO:0000166,GO:0042162,GO:1990631,GO:0005509,GO:0003697,GO:0042802,GO:0035368,GO:0042134,GO:0001525,GO:0032760,GO:2000232,GO:0043066,GO:1901838,GO:2000778,GO:0006897,GO:0045944,GO:0071222,	K11294|1|0.0e+00|1163.7|aju:106980991|nucleolin	gi|84875537|ref|NP_035010.3|	0	nucleolin [Mus musculus]
NM_008018.4	novel_mir142,novel_mir4380,novel_mir5776,novel_mir146,novel_mir557,novel_mir931,mmu-miR-6546-3p,novel_mir4005,novel_mir2845,novel_mir1292,novel_mir2742,novel_mir276,novel_mir4961,novel_mir3515,novel_mir496,novel_mir2564,novel_mir1000,novel_mir6142,novel_mir1226,novel_mir1338,mmu-miR-31-5p,novel_mir1037,novel_mir127,novel_mir438,novel_mir4648,novel_mir2573,novel_mir125,novel_mir4462,novel_mir251,n…	6mer	NA	-66.07	437	Sh3pxd2a	-	K08011|1|1.6e-52|214.2|hcq:109513735|neutrophil cytosolic factor 1	gi|181336814|ref|NP_032044.2|	0	SH3 and PX domain-containing protein 2A isoform 1 [Mus musculus]
NM_001167923.1	novel_mir5503,novel_mir1259,novel_mir1473,novel_mir4403,novel_mir656,novel_mir4521,novel_mir1793,novel_mir1769,novel_mir4770,novel_mir2906,novel_mir6021,novel_mir2648,novel_mir700,novel_mir5800,novel_mir1775,novel_mir1752,novel_mir1042,novel_mir1675,novel_mir3702,novel_mir1812,novel_mir1669,novel_mir4226,novel_mir3634,novel_mir204,novel_mir2554,novel_mir5275,mmu-miR-669e-5p,novel_mir5229,novel_mi…	6mer	NA	-24.9	156	Col6a5	-	K06238|1|0.0e+00|4635.9|rno:501047|collagen, type VI, alpha	gi|269315863|ref|NP_001161395.1|	0	collagen alpha-5(VI) chain precursor [Mus musculus]
NM_028804.1	novel_mir1512,novel_mir935,novel_mir3416,novel_mir3802,novel_mir861,novel_mir3574,novel_mir603,novel_mir3569,novel_mir1575,novel_mir52,novel_mir103,novel_mir973,novel_mir381,novel_mir3837,novel_mir836,novel_mir213,novel_mir5519,novel_mir4322,novel_mir1072,novel_mir5299,novel_mir3210,novel_mir1975,novel_mir1308,novel_mir459,novel_mir4626,novel_mir2718,novel_mir1030,novel_mir354,novel_mir784,novel_…	8mer-1a	NA	-22.94	152	Ccdc3	GO:0005576,GO:0005783,GO:0046889,GO:0045600,	K09291|1|1.8e-08|65.9|hro:HELRODRAFT_192727|nucleoprotein TPR!K00121|2|1.7e-06|59.3|phyp:113524435|S-(hydroxymethyl)glutathione dehydrogenase / alcohol dehydrogenase [EC:1.1.1.284 1.1.1.1]!K10624|3|4.9e-06|57.8|haw:110376011|E3 ubiquitin-protein ligase RBBP6 [EC:2.3.2.27]	gi|58037351|ref|NP_083080.1|	0	coiled-coil domain-containing protein 3 precursor [Mus musculus]
NM_133654.3	mmu-miR-431-5p,novel_mir2516,novel_mir5126,novel_mir3897,novel_mir616,novel_mir182,novel_mir4071,novel_mir2476,novel_mir64,novel_mir1449,novel_mir4529,novel_mir2778,novel_mir2234,novel_mir65,novel_mir2446,novel_mir382,novel_mir1046,novel_mir4636,novel_mir4039,novel_mir2530,novel_mir853,novel_mir2001,novel_mir4413,novel_mir3906,novel_mir1556,novel_mir2899,mmu-miR-6971-3p,novel_mir4607,novel_mir301…	7mer-m8	NA	-27.91	167	Cd34	GO:0016324,GO:0005887,GO:0005764,GO:0045171,GO:0009925,GO:0036053,GO:0048471,GO:0009897,GO:0030246,GO:0008134,GO:0043199,GO:0001935,GO:0001894,GO:0030195,GO:0007160,GO:0071425,GO:0032733,GO:0032720,GO:0045766,GO:0071657,GO:1900038,GO:0008217,GO:1901215,GO:0071971,GO:0038001,GO:0050900,GO:1900035,GO:1900168,GO:0010629,GO:0042482,GO:2001214,GO:1900041,GO:0045019,GO:0071636,	K06474|1|3.1e-217|759.2|mmu:12490|CD34 antigen	gi|161484606|ref|NP_001104529.1|	0	hematopoietic progenitor cell antigen CD34 isoform 1 precursor [Mus musculus]
NM_144783.2	novel_mir1914,novel_mir1203,novel_mir791,novel_mir4729,novel_mir3871,novel_mir1021,novel_mir3107,novel_mir1762,novel_mir1514,novel_mir395,novel_mir3566,novel_mir5213,novel_mir4101,novel_mir725,novel_mir3187,novel_mir457,novel_mir973,novel_mir4116,novel_mir4331,novel_mir459,novel_mir5778,novel_mir986,novel_mir4322,novel_mir922,novel_mir324,novel_mir1030,mmu-miR-700-5p,novel_mir2276,novel_mir5357,n…	6mer	NA	-22.09	147	Wt1	-	K09234|1|0.0e+00|1104.7|mmu:22431|Wilms tumor protein 1	gi|153281234|ref|NP_659032.3|	0	Wilms tumor protein homolog [Mus musculus]
NM_181040.4	novel_mir116,novel_mir1440,novel_mir2922,mmu-miR-188-5p,novel_mir2892,novel_mir271,novel_mir450,novel_mir5681,novel_mir1451,novel_mir799,novel_mir1661,novel_mir921,novel_mir307,novel_mir215,novel_mir3277,mmu-miR-324-5p,mmu-miR-486b-3p,novel_mir647,novel_mir5825,novel_mir233,novel_mir2269,novel_mir425,novel_mir1662,novel_mir883,mmu-miR-615-3p,novel_mir5723,novel_mir1620,novel_mir3507,novel_mir2043…	6mer	NA	-20.74	145	Atpaf1	GO:0005739,GO:0033615,	K07555|1|5.1e-198|695.3|mmu:230649|ATP synthase mitochondrial F1 complex assembly factor 1	gi|344925843|ref|NP_851383.2|	0	ATP synthase mitochondrial F1 complex assembly factor 1 [Mus musculus]
XM_006511869.3	mmu-miR-324-5p,novel_mir1435,novel_mir1446,mmu-miR-1199-5p,novel_mir2545,novel_mir2110,novel_mir233,novel_mir2707,novel_mir2105,novel_mir336,novel_mir2219,novel_mir1276,novel_mir4670,novel_mir2755,novel_mir2657,novel_mir1541,novel_mir3952,novel_mir799,mmu-miR-193b-5p,novel_mir2412,novel_mir549,novel_mir280,novel_mir662,novel_mir390,novel_mir636,novel_mir2775,novel_mir2726,novel_mir2704,novel_mir5…	6mer	NA	-21.32	142	Tmem108	GO:0016021,	K10955|1|1.4e-22|113.2|ssc:100127145|mucin-2	gi|568963232|ref|XP_006511926.1|	0	PREDICTED: transmembrane protein 108 isoform X2 [Mus musculus]
XM_006517008.2	novel_mir2821,novel_mir1966,mmu-miR-709,novel_mir658,novel_mir4133,novel_mir1145,novel_mir3412,novel_mir613,novel_mir1536,novel_mir171,novel_mir4033,mmu-miR-34a-5p,novel_mir168,novel_mir768,novel_mir128,novel_mir4212,novel_mir3662,novel_mir509,novel_mir3562,novel_mir3938,novel_mir699,novel_mir4840,novel_mir5270,novel_mir1124,mmu-miR-29b-3p,novel_mir679,novel_mir1621,novel_mir1720,novel_mir1365,no…	7mer-m8	NA	-44.67	324	Klhl3	GO:0005829,GO:0005856,GO:0031463,GO:0004842,GO:0003779,GO:0072156,GO:0070294,GO:0070936,GO:0042787,GO:0050801,	K10443|1|0.0e+00|1209.5|mmu:100503085|kelch-like protein 2/3	gi|387942525|sp|E0CZ16.2|KLHL3_MOUSE	0	RecName: Full=Kelch-like protein 3
NM_182991.2	novel_mir2802,novel_mir193,novel_mir3667,novel_mir689,novel_mir1487,novel_mir55,novel_mir3744,novel_mir3240,novel_mir5721,novel_mir140,novel_mir1817,novel_mir616,novel_mir4954,novel_mir4554,novel_mir3229,novel_mir2067,novel_mir1255,novel_mir5227,novel_mir3245,novel_mir5263,novel_mir5595,novel_mir2929,novel_mir52,novel_mir3546,novel_mir457,novel_mir2048,novel_mir2099,novel_mir103,novel_mir169,nove…	7mer-m8	NA	-26.31	160	Tmem59l	GO:0016021,GO:0000139,	-	gi|755526005|ref|XP_011240624.1|	0	PREDICTED: transmembrane protein 59-like isoform X1 [Mus musculus]
NM_177325.3	novel_mir1343,novel_mir2019,novel_mir5721,novel_mir2526,novel_mir164,novel_mir300,novel_mir5692,novel_mir388,novel_mir5582,novel_mir2555,novel_mir2358,novel_mir3457,novel_mir2997,novel_mir1975,novel_mir5642,novel_mir594,novel_mir893,novel_mir3769,novel_mir1766,novel_mir4636,novel_mir4101,novel_mir945,novel_mir722,novel_mir5844,novel_mir2431,novel_mir1419,novel_mir5291,novel_mir3187,novel_mir250,n…	7mer-m8	NA	-20.77	152	Tsr1	GO:0030688,GO:0005634,GO:0034511,GO:0003924,GO:0005525,GO:0000462,GO:0000479,	K14799|1|0.0e+00|1541.9|rno:100360406|pre-rRNA-processing protein TSR1	gi|126506294|ref|NP_796299.2|	0	pre-rRNA-processing protein TSR1 homolog [Mus musculus]
NM_018731.3	novel_mir2813,novel_mir2394,novel_mir3745,novel_mir258,novel_mir2673,novel_mir1668,novel_mir2535,novel_mir5608,novel_mir2438,novel_mir1763,novel_mir1399,novel_mir592,novel_mir3589,novel_mir700,novel_mir4463,novel_mir1204,novel_mir3419,novel_mir1365,novel_mir3533,novel_mir4035,novel_mir5251,novel_mir2936,novel_mir5166,novel_mir1223,novel_mir2767,mmu-miR-145a-3p,novel_mir1695,mmu-miR-6948-3p,novel_…	6mer	NA	-69.37	463	Atp4a	GO:0005887,GO:0043231,GO:0005615,GO:0016324,GO:0046982,GO:0103116,GO:0005391,GO:0008900,GO:0000287,GO:0005524,GO:0010155,GO:0045851,GO:0030007,GO:0036376,GO:0015991,GO:0006883,GO:0042493,GO:0010107,	K01542|1|0.0e+00|1818.1|pbi:103054731|H+/K+-exchanging ATPase alpha polypeptide [EC:3.6.3.10]	gi|110225337|ref|NP_061201.2|	0	potassium-transporting ATPase alpha chain 1 isoform 2 [Mus musculus]
NM_001039645.1	novel_mir5314,novel_mir698,novel_mir691,novel_mir978,novel_mir4318,novel_mir5193,novel_mir680,novel_mir632,novel_mir269,novel_mir5699,novel_mir1664,novel_mir159,novel_mir3808,mmu-miR-378a-5p,novel_mir4270,novel_mir2639,novel_mir1995,novel_mir5326,novel_mir1429,novel_mir264,novel_mir305,novel_mir435,novel_mir2168,novel_mir5666,novel_mir5519,novel_mir3425,novel_mir4950,novel_mir191,novel_mir3400,no…	7mer-m8	NA	-21.17	158	Asphd1	GO:0016021,GO:0019798,GO:0043734,GO:0052634,GO:0052635,GO:0018602,GO:0000907,GO:0034792,GO:0018193,GO:0055114,	K00476|1|4.3e-20|102.1|tad:TRIADDRAFT_31864|aspartate beta-hydroxylase [EC:1.14.11.16]	gi|88900479|ref|NP_001034734.1|	7.53036e-75	aspartate beta-hydroxylase domain-containing protein 1 [Mus musculus]
NM_146241.2	novel_mir2177,novel_mir837,novel_mir4807,novel_mir1381,novel_mir1848,novel_mir6089,novel_mir755,novel_mir415,novel_mir5101,novel_mir1677,novel_mir1096,novel_mir5995,novel_mir61,novel_mir1050,novel_mir3951,novel_mir2481,novel_mir245,novel_mir582,novel_mir2440,novel_mir410,novel_mir283,novel_mir2536,novel_mir943,novel_mir1543,novel_mir3339,novel_mir4273,novel_mir2675,novel_mir4346,novel_mir5193,nov…	7mer-m8	NA	-21.3	153	Trhde	GO:0016021,GO:0070062,GO:0005737,GO:0005886,GO:0042277,GO:0008270,GO:0070006,GO:0007267,GO:0043171,GO:0008217,GO:0006508,GO:0007165,	K01306|1|0.0e+00|2088.9|rno:366894|pyroglutamyl-peptidase II [EC:3.4.19.6]	gi|148689814|gb|EDL21761.1|	0	TRH-degrading enzyme, isoform CRA_b [Mus musculus]
NM_172611.4	novel_mir1588,novel_mir3802,novel_mir6052,novel_mir4594,novel_mir791,novel_mir5062,novel_mir4312,novel_mir1137,novel_mir4859,novel_mir1207,novel_mir3675,novel_mir587,novel_mir3671,novel_mir1861,novel_mir2433,novel_mir4116,novel_mir2490,novel_mir5227,novel_mir607,novel_mir2112,novel_mir1689,novel_mir905,novel_mir5778,novel_mir213,novel_mir3771,novel_mir5494,novel_mir354,novel_mir2276,novel_mir155,…	6mer	NA	-59.85	332	Gramd4	GO:0016021,GO:0005739,GO:0006915,	K19941|1|5.6e-06|58.2|ncc:104947478|synapsin	gi|27369870|ref|NP_766199.1|	0	GRAM domain-containing protein 4 isoform 1 [Mus musculus]
NM_053080.3	novel_mir507,novel_mir4536,novel_mir896,novel_mir5557,novel_mir4749,novel_mir5741,novel_mir2737,novel_mir1450,novel_mir3714,novel_mir1884,novel_mir3564,novel_mir1746,novel_mir5154,novel_mir2011,novel_mir1959,novel_mir260,novel_mir690,novel_mir3804,novel_mir3413,novel_mir2972,novel_mir2215,novel_mir5829,novel_mir4822,novel_mir4015,novel_mir123,novel_mir1193,novel_mir5746,novel_mir540,novel_mir1684…	7mer-m8	NA	-41.62	303	Aldh1a3	GO:0005829,GO:0070062,GO:0004030,GO:0004028,GO:0070324,GO:0070403,GO:0004029,GO:0001758,GO:0042803,GO:0007626,GO:0002072,GO:0060013,GO:0001822,GO:0048386,GO:0021983,GO:0042572,GO:0060324,GO:0042472,GO:0002138,GO:0043065,GO:0021768,GO:0042493,GO:0042574,GO:0050885,GO:0055114,GO:0060166,	K00129|1|1.6e-280|969.9|rss:109444900|aldehyde dehydrogenase (NAD(P)+) [EC:1.2.1.5]	gi|170650621|ref|NP_444310.3|	0	aldehyde dehydrogenase family 1 member A3 [Mus musculus]
NM_139063.1	novel_mir1214,novel_mir680,mmu-miR-497a-5p,novel_mir123,novel_mir5193,mmu-miR-6991-3p,novel_mir5690,novel_mir5890,novel_mir1553,novel_mir6,novel_mir3260,novel_mir178,novel_mir3804,novel_mir1646,novel_mir4598,novel_mir3413,mmu-miR-351-5p,novel_mir4866,novel_mir49,novel_mir4685,novel_mir426,novel_mir3742,novel_mir1959,novel_mir4304,novel_mir1068,novel_mir4556,novel_mir1600,novel_mir3679,novel_mir46…	8mer-1a	NA	-24.68	168	Bloc1s5	GO:1904115,GO:0030133,GO:0031083,GO:0005515,GO:0048490,GO:0032402,GO:0050942,GO:0032474,GO:0031175,GO:0035646,	K20187|1|5.9e-101|372.5|mmu:17828|biogenesis of lysosome-related organelles complex 1 subunit 5	gi|20532342|ref|NP_620702.1|	3.10351e-134	biogenesis of lysosome-related organelles complex 1 subunit 5 [Mus musculus]
NM_010465.2	novel_mir1242,novel_mir240,novel_mir755,novel_mir1423,novel_mir2207,novel_mir1130,novel_mir129,novel_mir4064,novel_mir1011,novel_mir248,novel_mir2184,novel_mir1381,novel_mir3529,novel_mir5382,novel_mir4210,novel_mir3044,novel_mir2430,novel_mir5193,novel_mir357,novel_mir1312,novel_mir2781,novel_mir2386,mmu-miR-351-5p,novel_mir2129,novel_mir4993,novel_mir2026,novel_mir1670,novel_mir1229,novel_mir21…	6mer	NA	-25.58	145	Hoxc6	GO:0005654,GO:0005737,GO:0043565,GO:0003714,GO:0003700,GO:0006357,GO:1903507,GO:0009952,GO:0048706,	K09306|1|1.6e-134|483.8|ptr:100607977|homeobox protein HoxA/B/C6	gi|24497544|ref|NP_710160.1|	1.3718e-110	homeobox protein Hox-C6 isoform 2 [Homo sapiens]
NM_172756.3	novel_mir4954,novel_mir3436,novel_mir5519,mmu-miR-1943-3p,novel_mir742,novel_mir1342,novel_mir5582,novel_mir2091,novel_mir4011,novel_mir1053,novel_mir3744,novel_mir1452,novel_mir3269,novel_mir697,novel_mir354,novel_mir5135,novel_mir4844,novel_mir4995,novel_mir838,novel_mir1920,mmu-miR-7b-5p,novel_mir5861,novel_mir3523,novel_mir4697,novel_mir4312,novel_mir1137,novel_mir2192,novel_mir1733,novel_mir…	8mer-1a	NA	-20.22	152	Ankle1	-	K21411|1|0.0e+00|1082.8|mmu:234396|ankyrin repeat and LEM domain-containing protein 1	gi|568955439|ref|XP_006509724.1|	0	PREDICTED: ankyrin repeat and LEM domain-containing protein 1 isoform X2 [Mus musculus]
NM_177629.4	novel_mir1469,novel_mir4549,novel_mir3673,novel_mir3263,novel_mir837,novel_mir2228,novel_mir1011,novel_mir738,novel_mir2722,novel_mir1253,novel_mir2398,novel_mir3442,novel_mir2836,novel_mir305,novel_mir1554,novel_mir2239,novel_mir903,novel_mir439,novel_mir3682,novel_mir2207,novel_mir264,novel_mir2671,novel_mir585,novel_mir1506,novel_mir4571,novel_mir3976,novel_mir2905,novel_mir2054,novel_mir3329,…	7mer-m8	NA	-43.45	314	Fam216b	-	-	gi|29244020|ref|NP_808297.1|	9.08451e-99	protein FAM216B [Mus musculus]
NM_021436.2	mmu-miR-3097-3p,novel_mir1886,novel_mir2826,novel_mir1094,novel_mir244,novel_mir1006,novel_mir4749,novel_mir530,novel_mir5173,mmu-miR-17-3p,novel_mir1504,novel_mir2386,novel_mir5177,novel_mir1588,novel_mir3697,novel_mir123,novel_mir1664,novel_mir623,novel_mir5364,novel_mir5414,novel_mir1311,novel_mir686,novel_mir840,novel_mir6094,mmu-miR-7052-3p,novel_mir5080,novel_mir2476,novel_mir3644,novel_mir…	7mer-m8	NA	-24.04	163	Tmeff1	GO:0016021,GO:0005886,GO:0007275,	K06254|1|1.5e-27|129.0|hcq:109511715|agrin	gi|568926524|ref|XP_006537901.1|	0	PREDICTED: tomoregulin-1 isoform X3 [Mus musculus]
NM_008110.2	mmu-miR-674-5p,novel_mir5473,novel_mir2634,novel_mir613,novel_mir946,mmu-miR-874-3p,novel_mir487,novel_mir2465,novel_mir4487,novel_mir2275,novel_mir5913,novel_mir912,novel_mir2308,novel_mir1218,novel_mir4159,novel_mir4877,novel_mir3665,novel_mir4666,novel_mir489,novel_mir347,novel_mir3326,novel_mir5217,novel_mir4212,novel_mir5630,novel_mir5711,novel_mir2554,novel_mir846,novel_mir1960,novel_mir358…	7mer-1a	NA	-30.24	151	Gdf9	GO:0005615,GO:0005737,GO:0008083,GO:0005125,GO:0005160,GO:0010862,GO:0001555,GO:2000870,GO:0042981,GO:0043408,GO:0008284,GO:0060395,GO:0030308,GO:0030509,	K22673|1|7.4e-261|903.7|mmu:14566|growth differentiation factor 9	gi|568971644|ref|XP_006532283.1|	0	PREDICTED: growth/differentiation factor 9 isoform X1 [Mus musculus]
NM_146064.1	novel_mir773,novel_mir3205,novel_mir4785,novel_mir2274,novel_mir4597,novel_mir1492,novel_mir531,novel_mir4607,novel_mir4472,novel_mir225,novel_mir404,novel_mir4361,novel_mir18,novel_mir316,novel_mir1021,novel_mir467,novel_mir3897,novel_mir192,novel_mir4489,novel_mir2526,novel_mir2276,novel_mir4948,novel_mir4137,novel_mir184,novel_mir469,novel_mir5126,novel_mir607,mmu-miR-3072-3p,novel_mir2189,nov…	8mer-1a	NA	-22.69	155	Soat2	GO:0016021,GO:0005903,GO:0005789,GO:0000062,GO:0034736,GO:0015485,GO:0033344,GO:0034379,GO:0034435,GO:0042632,GO:0008203,	K00637|1|4.6e-294|1014.2|rno:266770|sterol O-acyltransferase [EC:2.3.1.26]	gi|568992279|ref|XP_006520950.1|	0	PREDICTED: sterol O-acyltransferase 2 isoform X1 [Mus musculus]
NM_030187.1	novel_mir4005,novel_mir4328,novel_mir3445,novel_mir3070,novel_mir846,novel_mir5960,novel_mir451,novel_mir772,novel_mir4125,novel_mir4398,novel_mir5435,novel_mir387,novel_mir2043,novel_mir5939,novel_mir5457,novel_mir303,mmu-miR-185-5p,novel_mir602,novel_mir3234,novel_mir2370,novel_mir1424,novel_mir3800,novel_mir4096,mmu-miR-708-5p,novel_mir1544,novel_mir4073,novel_mir875,novel_mir292,novel_mir1282…	6mer	NA	-49.22	307	Ak7	-	K00939|1|0.0e+00|1444.5|mmu:78801|adenylate kinase [EC:2.7.4.3]	gi|568980726|ref|XP_006516453.1|	0	PREDICTED: adenylate kinase 7 isoform X1 [Mus musculus]
NM_026508.2	novel_mir893,novel_mir423,novel_mir1108,novel_mir482,novel_mir5536,novel_mir2997,novel_mir5614,novel_mir3412,novel_mir5641,novel_mir6053,novel_mir2269,novel_mir1662,novel_mir1183,novel_mir975,novel_mir183,novel_mir2019,novel_mir1733,novel_mir873,novel_mir370,novel_mir4936,novel_mir4859,novel_mir2140,novel_mir357,novel_mir771,novel_mir502,novel_mir1473,novel_mir1928,novel_mir3613,novel_mir1204,nov…	6mer	NA	-31.5	171	Trap1	GO:0005654,GO:0005758,GO:0005759,GO:0005743,GO:0070062,GO:0019901,GO:0051082,GO:0005524,GO:1901856,GO:0009386,GO:0006457,GO:1903751,	K09488|1|0.0e+00|1381.7|mmu:68015|TNF receptor-associated protein 1	gi|13385998|ref|NP_080784.1|	0	heat shock protein 75 kDa, mitochondrial precursor [Mus musculus]
NM_009674.3	novel_mir1870,novel_mir2923,novel_mir1568,novel_mir1673,novel_mir953,novel_mir2834,novel_mir4588,novel_mir4300,novel_mir4485,novel_mir4961,novel_mir488,novel_mir2611,novel_mir2789,novel_mir4489,novel_mir5755,novel_mir744,novel_mir4513,novel_mir1992,novel_mir2982,novel_mir1916,novel_mir3045,novel_mir4045,novel_mir603,mmu-miR-19b-3p,novel_mir1961,novel_mir2830,novel_mir2250,novel_mir454,novel_mir59…	6mer	NA	-29.39	168	Anxa7	GO:0005829,GO:0070062,GO:0042584,GO:0005635,GO:0005789,GO:0005886,GO:0005509,GO:0005544,GO:0005178,GO:0048306,GO:0009992,GO:0008360,GO:0009651,GO:0006874,GO:0061025,GO:0014070,GO:0010629,GO:0007599,GO:0008283,GO:0006914,GO:0051592,	K17095|1|1.1e-274|950.3|mmu:11750|annexin A7/11	gi|148669563|gb|EDL01510.1|	0	annexin A7, isoform CRA_a, partial [Mus musculus]
NM_033371.2	novel_mir2869,mmu-miR-125a-5p,novel_mir5229,novel_mir5923,novel_mir168,novel_mir102,novel_mir997,novel_mir180,novel_mir5217,novel_mir1277,novel_mir315,novel_mir3914,novel_mir4744,novel_mir389,novel_mir3528,novel_mir4792,novel_mir1133,novel_mir592,novel_mir2906,novel_mir520,novel_mir5337,mmu-miR-671-5p,novel_mir3579,novel_mir3376,novel_mir1122,novel_mir1712,novel_mir1520,novel_mir4058,novel_mir789…	6mer	NA	-26.87	170	Ppp1r16a	GO:0005829,GO:0005886,	K17458|1|1.2e-307|1059.7|mmu:73062|protein phosphatase 1 regulatory subunit 16A	gi|39930481|ref|NP_203535.1|	0	protein phosphatase 1 regulatory subunit 16A [Mus musculus]
NM_016687.3	novel_mir2915,novel_mir2505,novel_mir1497,novel_mir2370,novel_mir1226,novel_mir3650,novel_mir4189,novel_mir425,novel_mir1314,novel_mir1882,novel_mir480,novel_mir3896,novel_mir5920,novel_mir4380,novel_mir1591,mmu-miR-29b-3p,novel_mir451,novel_mir1067,novel_mir435,novel_mir1851,novel_mir191,novel_mir1495,novel_mir1292,novel_mir3326,novel_mir2402,novel_mir433,novel_mir5751,novel_mir4744,novel_mir101…	6mer	NA	-25.3	151	Sfrp4	GO:0009986,GO:0016021,GO:0005615,GO:0005737,GO:0005634,GO:0004930,GO:0017147,GO:0042813,GO:0046329,GO:0055062,GO:0035567,GO:0090263,GO:0060056,GO:0098779,GO:2000119,GO:0002092,GO:1902174,GO:0043433,GO:0090090,GO:0051384,GO:0046697,GO:0032355,GO:0008285,GO:0007186,GO:0043434,GO:0010628,GO:0045606,	K02185|1|8.4e-209|730.7|mmu:20379|secreted frizzled-related protein 4	gi|7710094|ref|NP_057896.1|	0	secreted frizzled-related sequence protein 4 precursor [Mus musculus]
NM_175443.5	novel_mir1858,mmu-miR-7024-5p,novel_mir1694,novel_mir2364,novel_mir1894,novel_mir1681,novel_mir3387,novel_mir898,novel_mir700,novel_mir592,novel_mir1793,novel_mir1133,novel_mir520,novel_mir5608,novel_mir4526,novel_mir1428,novel_mir4926,novel_mir431,novel_mir149,novel_mir159,novel_mir355,novel_mir6001,novel_mir698,novel_mir5472,novel_mir5584,novel_mir639,novel_mir3376,novel_mir2312,novel_mir6056,n…	7mer-m8	NA	-22.3	142	Etnk2	GO:0004103,GO:0005524,GO:0004305,GO:0004103,GO:0005524,GO:0004305,GO:0006646,GO:0001890,GO:0035264,GO:0009791,GO:0016310,GO:0001701,GO:0006646,GO:0001890,GO:0035264,GO:0009791,GO:0016310,GO:0001701,	K00894|1|1.2e-231|807.0|mmu:214253|ethanolamine kinase [EC:2.7.1.82]	gi|158303302|ref|NP_780652.2|	0	ethanolamine kinase 2 [Mus musculus]
NM_173866.3	novel_mir2912,novel_mir3591,novel_mir4489,mmu-miR-187-5p,novel_mir183,novel_mir566,novel_mir2526,novel_mir4539,novel_mir1597,novel_mir728,novel_mir2276,novel_mir2332,novel_mir3485,novel_mir324,novel_mir922,novel_mir622,novel_mir213,novel_mir259,novel_mir459,novel_mir353,novel_mir103,novel_mir319,novel_mir1575,novel_mir3546,novel_mir1995,novel_mir1565,novel_mir1377,novel_mir1207,novel_mir666,novel…	7mer-1a	NA	-21.33	147	Gpt2	GO:0005739,GO:0030170,GO:0004021,GO:0042851,GO:0009058,GO:0006103,	K00814|1|7.9e-307|1057.4|mmu:108682|alanine transaminase [EC:2.6.1.2]	gi|27805389|ref|NP_776291.1|	0	alanine aminotransferase 2 [Mus musculus]
NM_001004151.2	mmu-miR-1983,novel_mir259,novel_mir3141,novel_mir1831,novel_mir1626,novel_mir1167,novel_mir342,novel_mir5227,novel_mir2296,novel_mir2358,novel_mir1519,novel_mir5778,novel_mir1835,novel_mir6114,novel_mir1915,mmu-miR-328-3p,novel_mir300,novel_mir164,novel_mir4489,novel_mir4995,novel_mir1664,novel_mir1176,novel_mir4992,mmu-miR-221-5p,novel_mir632,novel_mir935,novel_mir5104,novel_mir531,novel_mir1995…	8mer-1a	NA	-23.08	144	Rtp1	GO:0009986,GO:0005886,GO:0016021,GO:0031849,GO:0001580,GO:0051205,GO:0006612,	-	gi|51921305|ref|NP_001004151.1|	0	receptor-transporting protein 1 [Mus musculus]
NM_001039485.4	novel_mir4781,novel_mir4598,novel_mir503,novel_mir3101,novel_mir4946,novel_mir3915,novel_mir5078,novel_mir1150,novel_mir123,novel_mir5693,novel_mir5088,novel_mir2074,novel_mir680,novel_mir409,novel_mir548,novel_mir858,novel_mir121,novel_mir5639,novel_mir366,novel_mir5354,novel_mir4752,novel_mir3571,novel_mir4895,novel_mir5294,novel_mir35,novel_mir4749,novel_mir3180,novel_mir830,novel_mir1746,mmu-…	6mer	NA	-23.78	160	Piezo2	GO:0005886,GO:0016021,GO:0008381,GO:0005515,GO:0005261,GO:0042391,GO:0050974,GO:0006812,	K22128|1|0.0e+00|5687.5|mmu:667742|piezo-type mechanosensitive ion channel component 1/2	gi|328887946|ref|NP_001034574.4|	0	piezo-type mechanosensitive ion channel component 2 [Mus musculus]
XM_011250885.2	novel_mir230,novel_mir1729,novel_mir788,novel_mir4222,novel_mir1004,novel_mir1314,novel_mir1053,novel_mir5411,novel_mir2912,novel_mir5414,novel_mir136,novel_mir129,novel_mir56,novel_mir4144,mmu-miR-199a-5p,mmu-miR-24-3p,novel_mir3890,novel_mir2253,novel_mir4340,novel_mir5888,novel_mir4015,novel_mir3107,novel_mir2129,novel_mir3103,novel_mir4376,novel_mir2665,novel_mir486,novel_mir3101,novel_mir601…	8mer-1a	NA	-23.54	154	Pnkp	GO:0016020,GO:0005730,GO:0005739,GO:0046403,GO:0046404,GO:0003690,GO:0019201,GO:0005524,GO:0042769,GO:0098504,GO:0046939,GO:0098506,GO:0032212,GO:1904355,GO:0051973,GO:0006979,	K08073|1|2.6e-281|971.5|mmu:59047|bifunctional polynucleotide phosphatase/kinase [EC:3.1.3.32 2.7.1.78]	gi|755521191|ref|XP_006541101.2|	0	PREDICTED: bifunctional polynucleotide phosphatase/kinase isoform X1 [Mus musculus]
NM_001081221.1	novel_mir729,novel_mir455,novel_mir1589,novel_mir201,novel_mir5841,novel_mir3512,novel_mir1924,novel_mir955,novel_mir4478,novel_mir4744,novel_mir287,novel_mir3521,novel_mir1007,novel_mir683,mmu-miR-92a-1-5p,novel_mir1040,novel_mir1468,novel_mir2799,novel_mir2673,novel_mir5004,novel_mir1876,novel_mir685,novel_mir168,novel_mir308,novel_mir3598,novel_mir1101,mmu-miR-193a-5p,mmu-miR-709,novel_mir3385…	7mer-1a	NA	-22.68	151	Ercc6	GO:0008023,GO:0005730,GO:0030296,GO:0008094,GO:0008022,GO:0047485,GO:0003677,GO:0032403,GO:0003682,GO:0005524,GO:0003678,GO:0061098,GO:0006362,GO:0010165,GO:0010332,GO:0007257,GO:0006290,GO:0008630,GO:0006283,GO:0045494,GO:0009636,GO:0032786,GO:0000303,GO:0010224,GO:0006284,GO:0007256,GO:0035264,	K10841|1|0.0e+00|2978.0|mmu:319955|DNA excision repair protein ERCC-6	gi|124487019|ref|NP_001074690.1|	0	DNA excision repair protein ERCC-6 [Mus musculus]
NM_028892.4	novel_mir851,novel_mir2573,novel_mir372,novel_mir1841,novel_mir4500,novel_mir5111,novel_mir3200,novel_mir975,novel_mir1691,novel_mir1568,novel_mir931,novel_mir644,novel_mir3536,novel_mir280,novel_mir1175,novel_mir745,novel_mir5097,novel_mir5980,novel_mir5688,novel_mir1595,novel_mir799,novel_mir5658,novel_mir2755,novel_mir5812,novel_mir1779,novel_mir2408,novel_mir4281,novel_mir4783,mmu-miR-431-5p,…	7mer-m8	NA	-30.26	160	Spag17	-	K12567|1|5.3e-13|82.4|fcd:110842678|titin [EC:2.7.11.1]	gi|162287182|ref|NP_083168.3|	0	sperm-associated antigen 17 [Mus musculus]
NM_177279.4	novel_mir946,novel_mir2238,novel_mir3492,novel_mir3218,novel_mir2143,mmu-miR-871-3p,mmu-miR-193a-3p,mmu-miR-193b-3p,novel_mir5960	6mer	NA	-25.87	158	Spata33	-	K02449|1|1.6e-14|83.6|cfa:489655|cyclin-dependent kinase 10 [EC:2.7.11.22]	gi|568957033|ref|XP_006531175.1|	1.06864e-75	PREDICTED: spermatogenesis-associated protein 33 isoform X3 [Mus musculus]
NM_138677.2	novel_mir781,novel_mir5812,novel_mir3358,novel_mir307,novel_mir365,novel_mir4006,novel_mir5478,novel_mir3606,novel_mir59,novel_mir677,novel_mir1360,novel_mir1294,novel_mir5525,novel_mir3746,novel_mir4034,novel_mir2324,novel_mir1128,novel_mir1960,mmu-miR-214-5p,mmu-miR-133a-3p,novel_mir1777,novel_mir650,novel_mir2211,novel_mir3090,mmu-miR-96-5p,novel_mir1025,novel_mir4227,novel_mir2475,novel_mir29…	6mer	NA	-20.9	150	Edem1	GO:0030176,GO:0015925,GO:0052859,GO:0015929,GO:0052769,GO:0004571,GO:0005509,GO:0044654,GO:0015928,GO:0016160,GO:0052736,GO:0044653,GO:0051787,GO:0015927,GO:0008933,GO:1904154,GO:0036510,GO:0006491,GO:0030968,GO:1904382,GO:0030433,	K10084|1|0.0e+00|1349.7|mmu:192193|ER degradation enhancer, mannosidase alpha-like 1	gi|37359844|dbj|BAC97900.1|	0	mKIAA0212 protein [Mus musculus]
XM_006522479.3	novel_mir6102,novel_mir2149,mmu-miR-674-3p,novel_mir4211,novel_mir658,novel_mir2032,mmu-miR-709,novel_mir3518,novel_mir3236,novel_mir2964,novel_mir718,novel_mir1157,novel_mir679,novel_mir315,novel_mir3562,novel_mir5809,novel_mir2703,novel_mir465,novel_mir288,novel_mir84,novel_mir955,novel_mir2100,novel_mir201,novel_mir4501,novel_mir2396,novel_mir3627,novel_mir3293,mmu-miR-181d-5p,novel_mir2293,no…	6mer	NA	-21.55	164	Mina	GO:0005829,GO:0005730,GO:0005667,GO:0052634,GO:0043734,GO:0019798,GO:0000907,GO:0001191,GO:0052635,GO:0018602,GO:0005506,GO:0034792,GO:0055114,GO:0043687,GO:0000122,GO:0042254,GO:0042127,GO:0018193,	K21760|1|6.7e-243|844.7|rno:266670|bifunctional lysine-specific demethylase and histidyl-hydroxylase MINA [EC:1.14.11.-]	gi|256355182|ref|NP_080186.3|	0	bifunctional lysine-specific demethylase and histidyl-hydroxylase MINA [Mus musculus]
NM_011593.2	novel_mir873,novel_mir1013,novel_mir2629,novel_mir2426,novel_mir448,novel_mir2140,novel_mir2448,novel_mir199,novel_mir2253,novel_mir835,novel_mir2995,novel_mir2673,novel_mir2528,novel_mir502,novel_mir4442,novel_mir4381,mmu-miR-6933-5p,novel_mir3868,novel_mir1204,novel_mir546,novel_mir2429,novel_mir4744,novel_mir713,novel_mir5775,novel_mir2031,mmu-miR-323-5p,novel_mir5275,novel_mir899,novel_mir546…	8mer-1a	NA	-21.6	152	Timp1	GO:0005604,GO:0005615,GO:0070062,GO:0008083,GO:0005125,GO:0046872,GO:0002020,GO:0008191,GO:1901164,GO:0051045,GO:0043066,GO:0009725,GO:0010951,GO:2001044,GO:0008284,GO:0034097,GO:0001775,	K16451|1|7.7e-118|427.6|mmu:21857|metallopeptidase inhibitor 1	gi|113205063|ref|NP_001037849.1|	6.10628e-100	metalloproteinase inhibitor 1 isoform a precursor [Mus musculus]
NM_033042.4	novel_mir2782,novel_mir2161,novel_mir3090,novel_mir2043,novel_mir1337,novel_mir3253,novel_mir608,novel_mir4520,novel_mir438,novel_mir5614,novel_mir2704,mmu-miR-214-5p,novel_mir1430,novel_mir3770,novel_mir1198,mmu-miR-423-3p,novel_mir1488,novel_mir1292,novel_mir921,novel_mir5009,novel_mir642,novel_mir1288,novel_mir495,novel_mir1393,novel_mir271,novel_mir4374,novel_mir3628,novel_mir4783,novel_mir58…	6mer	NA	-22	160	Tnfrsf25	GO:0005887,GO:0005031,GO:0006954,GO:0043410,GO:0007275,GO:0006955,GO:0042981,GO:0042127,GO:0097190,GO:0032496,	K05160|1|3.7e-211|738.4|mmu:85030|tumor necrosis factor receptor superfamily member 25	gi|755510184|ref|XP_011248665.1|	3.79742e-174	PREDICTED: tumor necrosis factor receptor superfamily member 25 isoform X4 [Mus musculus]
NM_025626.4	novel_mir3742,novel_mir2440,novel_mir2011,novel_mir1600,novel_mir5401,novel_mir5619,novel_mir674,novel_mir4275,novel_mir3496,novel_mir3797,novel_mir5354,novel_mir5538,novel_mir4536,novel_mir5819,mmu-miR-465c-5p,novel_mir5348,novel_mir770,novel_mir5373,novel_mir205,novel_mir823,novel_mir4909,novel_mir2972,novel_mir1047,novel_mir5008,novel_mir2223,novel_mir360,novel_mir3281,novel_mir1130,novel_mir6…	6mer	NA	-27.89	162	Fam107b	-	K08405|1|1.2e-13|83.2|egz:104132711|G protein-coupled receptor 25	gi|755496847|ref|XP_011237286.1|	9.74066e-106	PREDICTED: protein FAM107B isoform X4 [Mus musculus]
NM_019983.2	novel_mir4744,mmu-miR-337-3p,novel_mir1019,novel_mir84,novel_mir392,novel_mir2284,novel_mir5251,mmu-miR-7024-5p,novel_mir1339,novel_mir2172,novel_mir2837,novel_mir1204,novel_mir1365,novel_mir698,novel_mir2282,novel_mir706,novel_mir3171,novel_mir6001,novel_mir3745,novel_mir112,novel_mir2312,novel_mir654,novel_mir2262,novel_mir374,novel_mir5233,novel_mir4390,novel_mir448,mmu-miR-671-5p,novel_mir192…	7mer-m8	NA	-52.59	321	Rabgef1	GO:0031982,GO:0005769,GO:0017137,GO:0008270,GO:0003677,GO:0017112,GO:0061630,GO:0050728,GO:0048261,GO:0046580,GO:0001933,GO:0002686,GO:0006612,GO:0060368,GO:1900165,GO:1900235,GO:0043305,	K20131|1|2.8e-291|1005.4|rno:360797|Rab5 GDP/GTP exchange factor!K21917|5|4.5e-281|971.5|pale:102883240|BTB/POZ domain-containing protein KCTD7/14	gi|9910316|ref|NP_064367.1|	0	rab5 GDP/GTP exchange factor [Mus musculus]
NM_008403.4	novel_mir1068,novel_mir1959,novel_mir1078,novel_mir5665,novel_mir5173,novel_mir2440,novel_mir4825,novel_mir3672,novel_mir4049,novel_mir6143,novel_mir178,mmu-miR-214-3p,novel_mir5690,novel_mir5234,novel_mir5127,novel_mir5193,novel_mir3872,novel_mir20,novel_mir2572,novel_mir2443,novel_mir4452,novel_mir987,novel_mir5008,mmu-miR-6914-3p,novel_mir4045,novel_mir2992,novel_mir3911,novel_mir6046,novel_mi…	7mer-1a	NA	-20.7	152	Itgb1bp1	GO:0005856,GO:0005925,GO:0030027,GO:0005829,GO:0005886,GO:0070062,GO:0048471,GO:0005634,GO:0001726,GO:0008022,GO:0008565,GO:0005178,GO:0005092,GO:0019901,GO:0032148,GO:0090315,GO:0008284,GO:0010595,GO:0044344,GO:0032091,GO:0090051,GO:0002043,GO:0045747,GO:0051895,GO:0051451,GO:0035924,GO:0031214,GO:0051781,GO:0070373,GO:0035148,GO:0045944,GO:0006469,GO:0051496,GO:0050880,GO:0033622,GO:0090314,GO:…	K20058|1|2.8e-106|390.2|mmu:16413|integrin beta-1-binding protein 1	gi|6680488|ref|NP_032429.1|	7.38789e-144	integrin beta-1-binding protein 1 [Mus musculus]
XM_006534507.2	novel_mir2461,novel_mir636,novel_mir22,novel_mir551,novel_mir1169,novel_mir2839,novel_mir4401,novel_mir4134,novel_mir4968,novel_mir5805,novel_mir299,novel_mir1968,novel_mir1907,novel_mir2704,novel_mir1108,novel_mir2726,novel_mir491,novel_mir254,novel_mir2994,novel_mir1281,mmu-miR-7682-3p,novel_mir2710,novel_mir3999,novel_mir1350,novel_mir136,novel_mir1187,novel_mir3331,novel_mir3325,novel_mir393,…	7mer-1a	NA	-21.8	160	Helz	GO:0016020,GO:0005634,GO:0046872,GO:0004386,GO:0005515,GO:0005524,	K18422|1|5.3e-62|245.0|pret:103467400|helicase MOV-10 [EC:3.6.4.13]	gi|50355943|ref|NP_938040.1|	0	probable helicase with zinc finger domain [Mus musculus]
XM_006532888.1	novel_mir3261,novel_mir1441,novel_mir1175,novel_mir5456,novel_mir1466,novel_mir4371,novel_mir1368,novel_mir496,novel_mir1257,novel_mir2178,novel_mir1551,novel_mir3007,mmu-miR-31-5p,novel_mir4462,novel_mir387,novel_mir251,novel_mir5482,novel_mir710,novel_mir1403,novel_mir1010,novel_mir5856,novel_mir1158,novel_mir2831,novel_mir398,novel_mir6133,novel_mir1803,novel_mir1795,novel_mir3277,novel_mir906…	7mer-m8	NA	-21.95	141	Chd3	-	K11642|1|0.0e+00|3993.3|ccan:109693897|chromodomain-helicase-DNA-binding protein 3 [EC:3.6.4.12]	gi|568973027|ref|XP_006532947.1|	0	PREDICTED: chromodomain-helicase-DNA-binding protein 3 isoform X5 [Mus musculus]
NM_138747.2	novel_mir2150,novel_mir310,novel_mir1154,mmu-miR-486a-3p,novel_mir3898,novel_mir347,novel_mir1940,novel_mir580,novel_mir997,novel_mir894,novel_mir344,novel_mir4634,novel_mir1166,novel_mir741,novel_mir2298,novel_mir4106,novel_mir5473,novel_mir946,novel_mir502,novel_mir1259,mmu-miR-877-3p,novel_mir2978,novel_mir1632,novel_mir1585,novel_mir2448,novel_mir5130,novel_mir873,novel_mir592,novel_mir1609,n…	6mer	NA	-20.05	153	Nop2	GO:0005730,GO:0009019,GO:0008174,GO:0051994,GO:0034541,GO:0018423,GO:0030792,GO:0008650,GO:0016205,GO:0008988,GO:0034931,GO:0016428,GO:0043770,GO:0052735,GO:0008172,GO:0043791,GO:0009008,GO:0071424,GO:0018707,GO:0043851,GO:0043782,GO:0043777,GO:0052666,GO:0043776,GO:0080012,GO:0052667,GO:0043780,GO:0016435,GO:0043834,GO:0009383,GO:0008425,GO:0034807,GO:0019702,GO:0034933,GO:0043852,GO:0043833,GO:…	K14835|1|0.0e+00|1590.1|mmu:110109|25S rRNA (cytosine2870-C5)-methyltransferase [EC:2.1.1.310]	gi|158966689|ref|NP_620086.2|	0	probable 28S rRNA (cytosine-C(5))-methyltransferase [Mus musculus]
NM_177693.3	novel_mir356,novel_mir612,novel_mir2219,novel_mir4188,novel_mir3987,novel_mir1894,novel_mir5076,novel_mir2765,novel_mir634,novel_mir5819,novel_mir3190,novel_mir3937,novel_mir1579,novel_mir160,novel_mir1764,novel_mir238,mmu-miR-28a-5p,mmu-miR-708-5p,novel_mir1920,novel_mir673,novel_mir3707,novel_mir4804,novel_mir3413,mmu-miR-505-5p,novel_mir3099,novel_mir1436,mmu-miR-532-3p,novel_mir1573,novel_mir…	6mer	NA	-28.22	151	Lim2	GO:0031982,GO:0016021,GO:0005923,GO:0005886,GO:0005634,GO:0008270,GO:0043565,GO:0005212,GO:0045893,GO:0021702,GO:0021937,GO:0021766,GO:0002088,GO:0021846,GO:0021879,GO:0021527,	K06593|1|4.6e-19|99.4|phi:102107089|poliovirus receptor-related 4!K09106|2|6.5e-13|79.0|xtr:100487261|upstream stimulatory factor!K06087|3|3.3e-09|66.6|sko:100313577|claudin	gi|148690708|gb|EDL22655.1|	1.7092e-122	lens intrinsic membrane protein 2, partial [Mus musculus]
NM_053081.2	novel_mir3269,novel_mir2276,novel_mir2249,novel_mir354,novel_mir4058,novel_mir5596,novel_mir4539,novel_mir4681,novel_mir3897,novel_mir4489,novel_mir826,mmu-miR-6961-5p,novel_mir1003,mmu-miR-20a-5p,novel_mir3936,novel_mir3698,novel_mir4900,novel_mir5819,novel_mir4800,novel_mir395,novel_mir3797,novel_mir4752,novel_mir4989,novel_mir426,novel_mir4116,novel_mir4361,novel_mir4413,novel_mir5594,novel_mi…	7mer-m8	NA	-25.91	153	Fancg	GO:0043240,GO:0005739,GO:0005730,GO:0005886,GO:0009314,GO:0006281,GO:0007286,GO:0001541,GO:0007005,	K10894|1|0.0e+00|1081.6|rno:691105|fanconi anemia group G protein	gi|148670551|gb|EDL02498.1|	0	Fanconi anemia, complementation group G, isoform CRA_b, partial [Mus musculus]
NM_010411.2	novel_mir1073,novel_mir2699,novel_mir2597,novel_mir6021,novel_mir2283,novel_mir1164,novel_mir1750,novel_mir282,novel_mir448,novel_mir1432,novel_mir4804,novel_mir659,novel_mir1632,novel_mir4543,novel_mir1577,novel_mir4706,novel_mir3412,novel_mir297,novel_mir126,novel_mir290,novel_mir4321,novel_mir2298,novel_mir303,novel_mir5638,novel_mir3070,novel_mir2042,mmu-miR-450a-2-3p,novel_mir2834,mmu-miR-14…	7mer-m8	NA	-20.36	147	Hdac3	GO:0000118,GO:0005829,GO:0005876,GO:0005886,GO:0005794,GO:0000785,GO:0017053,GO:0003714,GO:0032041,GO:0030332,GO:0051059,GO:0051020,GO:0031490,GO:0042826,GO:0046329,GO:0007346,GO:0043525,GO:0042993,GO:0070932,GO:0032720,GO:0032922,GO:2000726,GO:0040014,GO:0031667,GO:0043433,GO:0071548,GO:0071498,GO:0001934,GO:0044255,GO:0045944,GO:0032692,GO:0000122,GO:0071374,GO:0046826,GO:0032008,GO:2000676,GO:…	K11404|1|6.3e-261|904.0|ngi:103736071|histone deacetylase 3 [EC:3.5.1.98]	gi|89257352|ref|NP_034541.2|	0	histone deacetylase 3 [Mus musculus]
NM_007992.2	novel_mir5503,novel_mir2596,novel_mir6080,novel_mir832,novel_mir592,novel_mir448,novel_mir1133,novel_mir3505,novel_mir1432,novel_mir1019,novel_mir4453,novel_mir4680,novel_mir1371,novel_mir2470,novel_mir2936,novel_mir4257,novel_mir1694,novel_mir6004,novel_mir5251,novel_mir2639,novel_mir2396,novel_mir1418,novel_mir2957,mmu-miR-378d,novel_mir2626,novel_mir718,novel_mir435,novel_mir5536,novel_mir1157…	7mer-1a	NA	-22.31	147	Fbln2	GO:0070062,GO:0005578,GO:0050840,GO:0005509,GO:0005515,GO:0010811,	K17307|1|0.0e+00|2619.0|mmu:14115|fibulin 1/2	gi|124517704|ref|NP_032018.2|	0	fibulin-2 isoform a precursor [Mus musculus]
NM_023131.1	novel_mir2169,novel_mir1449,novel_mir3709,novel_mir5492,novel_mir2067,novel_mir1975,mmu-miR-300-3p,novel_mir2065,novel_mir2119,novel_mir2838,novel_mir1370,novel_mir4369,novel_mir1835,novel_mir2516,novel_mir388,novel_mir184,novel_mir3844,mmu-miR-505-5p,novel_mir1263,novel_mir225,novel_mir3481,novel_mir782,novel_mir4630,novel_mir853,novel_mir632,novel_mir994,novel_mir4046,novel_mir902,novel_mir5422…	7mer-m8	NA	-23.27	152	Rce1	GO:0005789,GO:0016021,GO:0004175,GO:0071586,	K08658|1|9.9e-192|673.7|mmu:19671|prenyl protein peptidase [EC:3.4.22.-]	gi|667321523|ref|XP_008588212.1|	5.84876e-142	PREDICTED: CAAX prenyl protease 2 isoform X4 [Galeopterus variegatus]
NM_007929.2	novel_mir4361,novel_mir3646,novel_mir1531,novel_mir691,novel_mir2453,novel_mir838,novel_mir4848,novel_mir2001,novel_mir853,novel_mir3695,novel_mir316,novel_mir530,novel_mir5107,novel_mir1766,novel_mir4701,novel_mir881,novel_mir1492,novel_mir416,novel_mir65,novel_mir210,novel_mir1836,novel_mir1584,novel_mir2303,novel_mir207,novel_mir3602,novel_mir1870,novel_mir561,novel_mir952,novel_mir3899,novel_…	7mer-m8	NA	-26.43	158	Emp2	GO:0005794,GO:0009986,GO:0031410,GO:0016021,GO:0005901,GO:0005634,GO:0016324,GO:0005178,GO:0019901,GO:0032060,GO:0010594,GO:0001913,GO:0070836,GO:2001212,GO:0034394,GO:0032147,GO:0043534,GO:0008284,GO:0072659,GO:0007015,GO:0070252,GO:0001954,GO:0007566,GO:0008219,GO:0045765,GO:0045022,GO:0003093,GO:2001046,	K18626|1|2.0e-12|79.3|spis:111340095|trichohyalin	gi|111154059|ref|NP_031955.2|	2.2224e-123	epithelial membrane protein 2 [Mus musculus]
NM_172874.3	novel_mir531,novel_mir1409,novel_mir1203,novel_mir861,novel_mir1436,novel_mir3107,novel_mir1762,novel_mir1733,novel_mir5618,novel_mir5021,novel_mir293,novel_mir5845,novel_mir395,novel_mir4116,novel_mir353,novel_mir5291,novel_mir973,novel_mir1995,novel_mir4802,novel_mir3569,novel_mir3671,novel_mir2973,novel_mir5946,novel_mir1167,novel_mir340,novel_mir1308,novel_mir4834,novel_mir2127,novel_mir3633,…	7mer-m8	NA	-25.01	153	Podn	GO:0005615,GO:0005578,GO:0005737,GO:0004860,GO:0005518,GO:0030336,GO:0019221,GO:0008285,GO:0006469,GO:0046426,	K08123|1|1.5e-38|166.0|gja:107113939|keratocan	gi|32526861|ref|NP_766462.2|	0	podocan precursor [Mus musculus]
NM_008600.5	novel_mir84,novel_mir1905,novel_mir4068,novel_mir4736,novel_mir4509,novel_mir4154,novel_mir5760,novel_mir2829,novel_mir181,novel_mir2705,novel_mir63,novel_mir2293,novel_mir3521,novel_mir726,novel_mir673,novel_mir5575,novel_mir771,novel_mir1813,novel_mir950,novel_mir875,novel_mir4955,novel_mir5337,novel_mir1837,novel_mir3677,novel_mir168,novel_mir171,novel_mir487,novel_mir4133,novel_mir658,novel_m…	8mer-1a	NA	-22.61	150	Mip	GO:0005921,GO:0005887,GO:0046691,GO:0005783,GO:0005243,GO:0005516,GO:0015254,GO:0015250,GO:0005212,GO:0050896,GO:0009992,GO:0015722,GO:0007601,GO:0045785,GO:0006833,GO:0015793,GO:1990349,GO:0007154,GO:0051289,GO:0034220,GO:0002088,	K09863|1|8.6e-147|525.0|mmu:17339|aquaporin-0	gi|31543250|ref|NP_032626.2|	0	lens fiber major intrinsic protein [Mus musculus]
NM_001082976.2	novel_mir431,novel_mir215,novel_mir2514,novel_mir1513,novel_mir374,novel_mir2766,novel_mir3448,mmu-miR-466i-5p,novel_mir3810,novel_mir14,mmu-miR-532-5p,novel_mir706,novel_mir5396,novel_mir3718,novel_mir3355,novel_mir2182,novel_mir3199,novel_mir1478,novel_mir2109,novel_mir1185,novel_mir1656,novel_mir2616,novel_mir5251,novel_mir2494,novel_mir3627,novel_mir5600,novel_mir2214,novel_mir201,novel_mir28…	7mer-1a	NA	-22.8	152	Tc2n	GO:0005634,GO:0005886,GO:0005509,GO:0005544,GO:0030276,GO:0019905,GO:0006906,GO:0010468,GO:0030193,GO:0017158,GO:0048791,	K17287|1|2.6e-282|976.5|mmu:74413|tandem C2 domains nuclear protein	gi|21312724|ref|NP_083200.1|	0	tandem C2 domains nuclear protein [Mus musculus]
NM_177612.3	novel_mir409,novel_mir5145,novel_mir177,novel_mir5008,novel_mir4318,novel_mir3804,novel_mir941,novel_mir514,novel_mir2011,novel_mir1746,novel_mir23,novel_mir5412,mmu-miR-149-5p,novel_mir332,novel_mir1860,novel_mir507,novel_mir2999,novel_mir5272,novel_mir4007,novel_mir2050,novel_mir1943,novel_mir903,novel_mir423,novel_mir2153,novel_mir3962,novel_mir5447,novel_mir1712,novel_mir2598,novel_mir4846,no…	8mer-1a	NA	-20.35	158	Ctnna3	GO:0005856,GO:0030027,GO:0005737,GO:0005916,GO:0008013,GO:0086083,GO:0051015,GO:0045296,GO:0098911,GO:0086091,GO:0086073,	K05691|1|0.0e+00|1731.1|mmu:216033|catenin alpha	gi|256985119|ref|NP_808280.2|	0	catenin alpha-3 isoform 1 [Mus musculus]
XM_006499517.3	novel_mir3603,novel_mir5599,novel_mir521,novel_mir172,novel_mir713,novel_mir5615,novel_mir590,novel_mir909,novel_mir450,novel_mir583,novel_mir635,novel_mir2272,novel_mir2583,novel_mir4023,novel_mir3858,novel_mir15,novel_mir4518,novel_mir4362,novel_mir4074,mmu-miR-370-3p,novel_mir787,novel_mir1544,novel_mir98,novel_mir215,novel_mir1516,novel_mir2782,novel_mir166,novel_mir645,novel_mir3138,mmu-miR-…	6mer	NA	-21.44	165	Ralgapa2	-	K07207|1|2.7e-23|116.3|myi:110446021|tuberous sclerosis 2	gi|568917027|ref|XP_006499580.1|	0	PREDICTED: ral GTPase-activating protein subunit alpha-2 isoform X1 [Mus musculus]
NM_001081641.1	novel_mir252,novel_mir4697,novel_mir853,novel_mir723,novel_mir4179,novel_mir316,novel_mir3695,novel_mir1127,mmu-miR-871-3p,novel_mir691,novel_mir1531,novel_mir1492,mmu-miR-186-5p,novel_mir416,novel_mir1836,novel_mir4785,novel_mir4800,mmu-miR-1964-5p,novel_mir1046,novel_mir722,novel_mir1736,novel_mir1766,novel_mir4203,novel_mir3664,novel_mir4502,novel_mir561,novel_mir4987,novel_mir2303,mmu-miR-307…	6mer	NA	-43.55	297	Pitpnm3	-	K08576|1|7.3e-80|304.3|egl:EGR_00902|calpain-7 [EC:3.4.22.-]!K00469|3|6.9e-14|85.1|pss:102444630|inositol oxygenase [EC:1.13.99.1]!K13619|4|1.6e-10|73.9|pbar:105423097|phospholipase DDHD1 [EC:3.1.1.-]	gi|126032319|ref|NP_001075110.1|	0	membrane-associated phosphatidylinositol transfer protein 3 isoform 2 [Mus musculus]
NM_033588.4	novel_mir3436,novel_mir1817,novel_mir1706,novel_mir926,novel_mir1255,novel_mir552,novel_mir524,novel_mir2932,novel_mir2137,novel_mir2838,novel_mir737,novel_mir3391,novel_mir3897,novel_mir747,novel_mir192,novel_mir5049,novel_mir1343,novel_mir4161,novel_mir5721,novel_mir994,novel_mir578,novel_mir825,novel_mir1490,novel_mir2256,novel_mir2530,novel_mir5974,novel_mir5882,novel_mir1556,novel_mir4630,no…	6mer	NA	-20.8	148	Pcdhga5	GO:0016021,GO:0005886,GO:0005509,GO:0007156,	K16495|1|0.0e+00|1586.2|hsa:56110|protocadherin gamma subfamily A	gi|18087761|ref|NP_291066.1|	0	protocadherin gamma-A5 precursor [Mus musculus]
NM_053267.2	novel_mir2032,novel_mir991,novel_mir648,novel_mir171,novel_mir5939,novel_mir4565,novel_mir645,novel_mir646,novel_mir1119,novel_mir496,novel_mir4796,novel_mir939,novel_mir3628,novel_mir2364,novel_mir4451,novel_mir909,novel_mir1294,novel_mir713,novel_mir4990,novel_mir455,novel_mir3787,novel_mir4290,novel_mir84,novel_mir2306,novel_mir906,novel_mir1446,novel_mir1432,novel_mir307,novel_mir3465,novel_m…	6mer	NA	-27.84	154	Selm	GO:0005794,GO:0005783,GO:0042445,GO:0035264,GO:0010269,GO:0060612,GO:0035934,	-	gi|23956246|ref|NP_444497.1|	1.41185e-102	selenoprotein M precursor [Mus musculus]
NM_027072.1	novel_mir2583,novel_mir3745,novel_mir3376,novel_mir333,novel_mir18,novel_mir1556,novel_mir2530,novel_mir653,novel_mir520,novel_mir3494,novel_mir109,novel_mir5294,novel_mir3739,novel_mir973,novel_mir1065,novel_mir1276,novel_mir1213,novel_mir1154,novel_mir459,novel_mir2490,novel_mir77,novel_mir1165,novel_mir1805,novel_mir2366,novel_mir1218,novel_mir4161,novel_mir1343,novel_mir2465,novel_mir168,nove…	7mer-m8	NA	-31.79	163	Plac8l1	-	-	gi|254587980|ref|NP_081348.1|	2.31727e-128	PLAC8-like protein 1 [Mus musculus]
XM_006526520.3	mmu-miR-381-3p,novel_mir4729,novel_mir1664,novel_mir5618,novel_mir1733,novel_mir2353,novel_mir209,novel_mir3107,novel_mir632,novel_mir1436,novel_mir603,novel_mir3902,mmu-miR-148a-3p,novel_mir2326,novel_mir1995,novel_mir3340,novel_mir1186,novel_mir5477,novel_mir3675,novel_mir5769,novel_mir3657,novel_mir4473,novel_mir913,novel_mir214,novel_mir5595,novel_mir3081,novel_mir2147,novel_mir826,novel_mir7…	7mer-m8	NA	-27.65	154	Pqlc1	GO:0016021,	K14779|1|3.0e-40|171.0|soc:105204838|ATP-dependent RNA helicase DDX52/ROK1 [EC:3.6.4.13]	gi|257096074|ref|NP_080137.2|	0	PQ-loop repeat-containing protein 1 isoform a [Mus musculus]
NM_145456.2	novel_mir1198,novel_mir3923,novel_mir1257,novel_mir3445,novel_mir2845,novel_mir1225,novel_mir804,novel_mir3475,novel_mir1350,novel_mir387,mmu-let-7k,novel_mir1226,mmu-miR-31-5p,novel_mir1583,novel_mir5441,novel_mir4500,novel_mir1000,novel_mir3153,novel_mir454,novel_mir4703,novel_mir4050,mmu-miR-466i-5p,novel_mir3929,novel_mir3199,novel_mir116,novel_mir2214,novel_mir3262,novel_mir1072,novel_mir529…	7mer-1a	NA	-26.96	154	Zswim6	GO:0008270,GO:0048812,GO:2001222,	K01231|1|3.4e-277|959.5|nfu:107374983|alpha-mannosidase II [EC:3.2.1.114]!K19475|3|5.7e-14|85.1|fab:101815241|WAS/WASL-interacting protein	gi|210147530|ref|NP_663431.2|	0	zinc finger SWIM domain-containing protein 6 [Mus musculus]
NM_025697.4	novel_mir2060,novel_mir1377,novel_mir5610,novel_mir1425,novel_mir5286,novel_mir395,novel_mir2431,novel_mir6120,novel_mir470,mmu-miR-503-5p,novel_mir3613,novel_mir410,novel_mir1332,novel_mir4091,novel_mir144,novel_mir275,novel_mir791,novel_mir2442,novel_mir118,novel_mir2386,novel_mir177,novel_mir1180,novel_mir6052,novel_mir5088,novel_mir370,novel_mir4259,novel_mir5483,novel_mir1237,novel_mir858,no…	6mer	NA	-20.14	148	Spryd7	-	-	gi|27228993|ref|NP_079973.1|	1.82226e-147	SPRY domain-containing protein 7 isoform 1 [Mus musculus]
NM_001004185.3	novel_mir1543,novel_mir5819,novel_mir1764,novel_mir5164,novel_mir283,novel_mir119,novel_mir1078,novel_mir1799,novel_mir144,novel_mir5128,novel_mir2129,novel_mir4993,novel_mir3733,novel_mir5193,novel_mir2675,novel_mir4144,novel_mir6077,novel_mir274,novel_mir6031,novel_mir5382,novel_mir3655,novel_mir1196,novel_mir5596,novel_mir137,novel_mir129,novel_mir1130,novel_mir384,novel_mir979,novel_mir4856,n…	7mer-1a	NA	-34.04	175	Whamm	-	K20479|1|0.0e+00|1614.7|mmu:434204|WASP homolog-associated protein with actin, membranes and microtubules	gi|568948071|ref|XP_006541044.1|	0	PREDICTED: WASP homolog-associated protein with actin, membranes and microtubules isoform X2 [Mus musculus]
NM_177088.3	novel_mir136,novel_mir859,novel_mir4209,novel_mir1053,novel_mir2047,novel_mir322,novel_mir3897,novel_mir5810,novel_mir2161,novel_mir4844,novel_mir2526,mmu-miR-24-3p,novel_mir1202,novel_mir3004,novel_mir5666,novel_mir5519,novel_mir986,novel_mir318,novel_mir1002,novel_mir3962,novel_mir77,novel_mir1157,novel_mir5523,novel_mir422,novel_mir245,novel_mir788,novel_mir353,novel_mir3533,novel_mir1605,nove…	6mer	NA	-21.46	141	Cep95	GO:0005737,GO:0005813,GO:0000922,	K16544|1|0.0e+00|1656.3|mmu:320162|centrosomal protein CEP95	gi|262331533|ref|NP_001160157.1|	0	centrosomal protein of 95 kDa isoform 2 [Mus musculus]
NM_144528.3	novel_mir1292,novel_mir588,novel_mir220,novel_mir496,novel_mir1402,novel_mir3384,novel_mir4570,novel_mir3770,novel_mir5524,novel_mir4380,novel_mir146,novel_mir482,novel_mir491,novel_mir4823,novel_mir4271,novel_mir2269,novel_mir254,novel_mir2994,novel_mir1662,novel_mir4520,novel_mir251,novel_mir829,novel_mir5916,novel_mir3498,novel_mir278,novel_mir2615,novel_mir3480,novel_mir865,novel_mir4516,nove…	8mer-1a	NA	-27.72	155	Rnf126	GO:0005829,GO:0005634,GO:0008270,GO:0070740,GO:0043773,GO:0043774,GO:0008766,GO:0070736,GO:0061630,GO:0070738,GO:0018169,GO:0070737,GO:0005154,GO:0042147,GO:0071629,GO:0070936,GO:0042059,GO:0006513,GO:0042787,GO:0070534,GO:0042127,GO:0043162,	K11982|1|2.9e-187|659.1|mmu:70294|E3 ubiquitin-protein ligase RNF115/126 [EC:2.3.2.27]	gi|21362321|ref|NP_653111.1|	0	E3 ubiquitin-protein ligase RNF126 [Mus musculus]
XM_006537658.1	novel_mir304,novel_mir1701,novel_mir174,novel_mir3999,novel_mir1403,novel_mir4520,novel_mir3191,novel_mir2573,novel_mir2994,novel_mir1338,novel_mir5562,novel_mir5940,mmu-miR-872-3p,novel_mir1682,novel_mir5111,novel_mir3325,novel_mir343,novel_mir549,novel_mir3839,novel_mir4961,novel_mir280,novel_mir2366,novel_mir1488,novel_mir1466,novel_mir636,mmu-miR-298-5p,novel_mir1702,novel_mir1405,novel_mir14…	6mer	NA	-25.28	157	Nr4a3	GO:0005667,GO:0042629,GO:0005634,GO:0042803,GO:0003707,GO:0000978,GO:0035259,GO:0001223,GO:0004879,GO:0001077,GO:0008270,GO:0001046,GO:0019901,GO:0035035,GO:0021766,GO:0043524,GO:0050885,GO:2000108,GO:0007411,GO:0009444,GO:0061469,GO:0032765,GO:0046321,GO:0030534,GO:0010613,GO:0010828,GO:0035726,GO:0001707,GO:0030522,GO:0031100,GO:1900625,GO:0071870,GO:0050679,GO:0043303,GO:2000253,GO:2000505,GO:…	K08559|1|0.0e+00|1326.2|ocu:100344785|nuclear receptor subfamily 4 group A member 3	gi|7657397|ref|NP_056558.1|	0	nuclear receptor subfamily 4 group A member 3 isoform 1 [Mus musculus]
NM_177378.4	mmu-miR-7667-5p,novel_mir6020,novel_mir242,novel_mir3744,novel_mir3688,novel_mir3068,novel_mir3240,novel_mir4844,novel_mir2019,novel_mir3656,novel_mir69,mmu-miR-1943-3p,novel_mir2563,novel_mir800,novel_mir2801,mmu-miR-378a-3p,novel_mir3567,novel_mir4459,novel_mir3457,novel_mir901,novel_mir1870,novel_mir3229,novel_mir2748,novel_mir210,novel_mir4018,novel_mir4498,novel_mir169,novel_mir530,novel_mir…	7mer-m8	NA	-23.08	154	Rnf150	-	K15701|1|1.7e-106|393.3|cmk:103188225|E3 ubiquitin-protein ligase RNF130 [EC:2.3.2.27]	gi|755526894|ref|XP_011246711.1|	0	PREDICTED: RING finger protein 150 isoform X1 [Mus musculus]
NM_021487.1	novel_mir631,novel_mir4403,novel_mir282,novel_mir1133,mmu-miR-341-5p,novel_mir1468,novel_mir2528,novel_mir3977,novel_mir4488,novel_mir5099,novel_mir1632,novel_mir950,novel_mir555,novel_mir1122,novel_mir4712,novel_mir279,novel_mir2694,novel_mir5846,novel_mir4996,novel_mir4257,novel_mir2396,novel_mir6004,novel_mir1365,novel_mir4009,novel_mir501,novel_mir93,novel_mir6021,novel_mir389,novel_mir138,no…	7mer-m8	NA	-25.38	152	Kcne1l	GO:0008076,GO:0015459,GO:0086008,GO:0044325,GO:0086091,GO:1901381,GO:0086014,GO:2001257,GO:0086005,GO:0060307,GO:1901380,GO:0071435,GO:0060372,GO:0086013,	K04895|1|3.4e-75|286.6|mmu:66240|potassium voltage-gated channel Isk-related subfamily E member 1-like	gi|10946898|ref|NP_067462.1|	1.20963e-99	potassium voltage-gated channel subfamily E regulatory beta subunit 5 [Mus musculus]
NM_007531.2	novel_mir1873,novel_mir241,novel_mir116,novel_mir1206,novel_mir3952,novel_mir749,novel_mir188,novel_mir2426,novel_mir3277,novel_mir906,novel_mir4192,novel_mir1446,novel_mir3307,novel_mir2277,novel_mir1922,novel_mir3225,novel_mir1795,novel_mir3429,novel_mir829,mmu-miR-7682-3p,novel_mir66,novel_mir3480,novel_mir3498,novel_mir202,novel_mir4134,novel_mir496,novel_mir3839,novel_mir4902,novel_mir2366,n…	6mer	NA	-53.28	294	Phb2	GO:0009986,GO:0016363,GO:0043234,GO:0070062,GO:0005741,GO:0071944,GO:0005743,GO:0047485,GO:0008022,GO:0033218,GO:0030331,GO:0033600,GO:0060744,GO:0033147,GO:0070374,GO:0051091,GO:0045892,GO:0007005,GO:0043433,GO:0030449,GO:0000060,GO:0007062,GO:1902808,GO:0060762,GO:0050821,GO:0031536,GO:0043066,GO:0060749,	K17081|1|1.1e-160|570.5|ptr:451805|prohibitin 2	gi|126723336|ref|NP_031557.2|	0	prohibitin-2 [Mus musculus]
NM_134155.1	novel_mir3685,novel_mir3116,novel_mir1773,novel_mir3243,novel_mir5272,novel_mir1738,novel_mir245,novel_mir301,novel_mir5972,novel_mir558,novel_mir3483,novel_mir322,novel_mir2337,novel_mir2286,novel_mir3655,novel_mir488,mmu-miR-450b-5p,novel_mir45,novel_mir4846,novel_mir4077,novel_mir1458,novel_mir4013,novel_mir3785,novel_mir4356,novel_mir1794,novel_mir2420,mmu-miR-497a-5p,novel_mir123,mmu-miR-351…	7mer-m8	NA	-26.7	155	Brms1	GO:0005737,GO:0070822,GO:0004407,GO:0042826,GO:0051059,GO:0000122,GO:0090312,GO:0016575,GO:0032088,GO:2000210,GO:0040008,	K19196|1|1.7e-135|486.9|mmu:107392|breast cancer metastasis-suppressor 1 and related proteins	gi|569005533|ref|XP_006531688.1|	3.89949e-152	PREDICTED: breast cancer metastasis-suppressor 1 homolog isoform X2 [Mus musculus]
XM_006519268.3	novel_mir1502,novel_mir573,novel_mir1152,mmu-miR-1964-5p,novel_mir1581,novel_mir2743,novel_mir2507,novel_mir4259,novel_mir1614,novel_mir2951,novel_mir3695,novel_mir2530,novel_mir275,novel_mir5185,novel_mir4616,mmu-miR-505-5p,novel_mir1556,mmu-miR-5123,novel_mir5257,novel_mir4619,novel_mir1053,novel_mir2154,novel_mir4844,novel_mir5049,novel_mir532,novel_mir561,novel_mir696,novel_mir5781,novel_mir1…	7mer-1a	NA	-25.11	158	Kat6b	GO:0000786,GO:0005634,GO:0008270,GO:0004402,GO:0003677,GO:0032403,GO:0045944,GO:0006334,GO:0016573,	K11306|1|0.0e+00|3516.5|rno:688634|histone acetyltransferase MYST4 [EC:2.3.1.48]	gi|110556652|ref|NP_059507.2|	0	histone acetyltransferase KAT6B [Mus musculus]
NM_011994.2	novel_mir6071,novel_mir1047,novel_mir464,novel_mir4452,mmu-miR-497a-5p,novel_mir4563,novel_mir5234,novel_mir3304,novel_mir1911,novel_mir5223,mmu-miR-7051-5p,novel_mir2788,novel_mir4989,novel_mir4275,novel_mir5522,novel_mir558,novel_mir882,novel_mir3682,novel_mir245,novel_mir3951,novel_mir3618,novel_mir285,novel_mir907,novel_mir2706,novel_mir1542,novel_mir755,novel_mir5596,novel_mir4549,novel_mir5…	7mer-1a	NA	-74.03	452	Abcd2	GO:0016021,GO:0005739,GO:0005778,GO:0042626,GO:0005524,GO:0042803,GO:0055085,GO:0042760,GO:0032000,	K05676|1|0.0e+00|1481.5|mmu:26874|ATP-binding cassette, subfamily D (ALD), member 2	gi|60218875|ref|NP_036124.2|	0	ATP-binding cassette sub-family D member 2 [Mus musculus]
XM_006499734.3	novel_mir3416,novel_mir225,novel_mir1588,novel_mir3802,novel_mir3705,novel_mir2874,novel_mir3661,novel_mir209,novel_mir2431,novel_mir4802,novel_mir1565,novel_mir5298,novel_mir2274,novel_mir103,novel_mir3081,novel_mir1072,novel_mir1626,novel_mir1597,novel_mir5917,novel_mir4338,novel_mir3649,novel_mir4489,novel_mir183,novel_mir2119,novel_mir784,novel_mir184,novel_mir1370,novel_mir4719,novel_mir5053…	7mer-1a	NA	-21.58	152	Tcp11l1	GO:0005874,	K15183|1|1.5e-09|70.5|mmu:269344|RNA polymerase II elongation factor ELL	gi|28893201|ref|NP_796164.1|	0	T-complex protein 11-like protein 1 [Mus musculus]
NM_178730.3	novel_mir297,novel_mir1238,novel_mir1287,novel_mir4136,novel_mir2897,novel_mir5333,novel_mir4033,novel_mir5065,novel_mir2043,novel_mir5457,novel_mir3938,mmu-miR-423-3p,novel_mir4840,novel_mir5325,novel_mir1889,novel_mir3445,novel_mir588,novel_mir3100,novel_mir3467,mmu-miR-214-5p,novel_mir679,novel_mir2990,novel_mir2212,novel_mir3280,novel_mir1694,novel_mir5149,novel_mir2182,novel_mir2837,novel_mi…	8mer-1a	NA	-22.03	150	Tmprss11f	GO:0005576,GO:0005887,GO:0004252,GO:0006508,	K09752|1|3.4e-256|889.4|mmu:243083|transmembrane protease serine 11F [EC:3.4.21.-]	gi|32189423|ref|NP_848845.1|	0	transmembrane protease serine 11F [Mus musculus]
NM_011609.4	novel_mir1053,novel_mir2912,novel_mir5328,novel_mir4719,novel_mir3282,novel_mir2838,novel_mir4289,novel_mir728,novel_mir164,novel_mir2526,novel_mir1107,novel_mir4260,novel_mir561,novel_mir3771,novel_mir1072,novel_mir3141,novel_mir324,novel_mir788,novel_mir1188,novel_mir926,novel_mir1004,novel_mir1519,novel_mir2169,novel_mir5595,novel_mir1721,novel_mir3,novel_mir5945,novel_mir4959,novel_mir103,nov…	7mer-m8	NA	-45.85	295	Tnfrsf1a	GO:0009986,GO:0005887,GO:0005829,GO:0005615,GO:0045121,GO:0030424,GO:0000139,GO:0043235,GO:0005739,GO:0045202,GO:0005634,GO:0005031,GO:0043120,GO:0002020,GO:0032403,GO:0050728,GO:0006955,GO:0043525,GO:1903140,GO:0045766,GO:0042742,GO:0045944,GO:0042127,GO:0033209,GO:0010629,GO:0006693,GO:0008625,GO:0050729,GO:0008630,GO:0032760,GO:0032715,GO:0043066,GO:0051291,GO:0033160,GO:0032496,	K03158|1|1.8e-277|959.1|mmu:21937|tumor necrosis factor receptor superfamily member 1A	gi|31560799|ref|NP_035739.2|	0	tumor necrosis factor receptor superfamily member 1A precursor [Mus musculus]
NM_027866.2	novel_mir1338,novel_mir3071,novel_mir5382,novel_mir912,novel_mir4998,novel_mir3412,novel_mir1701,novel_mir5431,novel_mir129,novel_mir3492,novel_mir4011,novel_mir3667,novel_mir4807,novel_mir4614,novel_mir4851,novel_mir146,novel_mir5211,novel_mir2247,novel_mir3039,novel_mir2905,novel_mir5642,novel_mir4027,novel_mir347,novel_mir3567,novel_mir696,novel_mir2765,novel_mir1229,novel_mir963,novel_mir605,…	7mer-m8	NA	-25.93	145	Colec11	-	K16630|1|2.7e-16|90.9|dre:100317029|collagen, type XXII, alpha	gi|103472134|ref|NP_082142.1|	0	collectin-11 isoform 2 precursor [Mus musculus]
NM_008024.2	novel_mir136,novel_mir304,novel_mir174,novel_mir1403,novel_mir127,novel_mir5994,novel_mir2132,novel_mir2573,novel_mir438,novel_mir3680,novel_mir6142,novel_mir500,novel_mir3498,novel_mir4892,novel_mir276,novel_mir3770,novel_mir4961,novel_mir280,novel_mir3923,novel_mir4709,mmu-miR-298-5p,novel_mir4005,novel_mir750,novel_mir2704,mmu-miR-5620-5p,novel_mir1968,novel_mir4808,novel_mir2061,novel_mir1874…	7mer-m8	NA	-51.62	304	Foxl1	GO:0005634,GO:0000981,GO:0043565,GO:0061146,GO:0007495,GO:0030111,GO:0007507,GO:0006355,GO:0030166,	K09405|1|9.4e-197|691.4|mmu:14241|forkhead box protein L	gi|120952618|ref|NP_032050.2|	0	forkhead box protein L1 [Mus musculus]
NM_010321.1	novel_mir3599,novel_mir5194,novel_mir4241,novel_mir4996,novel_mir2202,novel_mir2615,novel_mir5940,novel_mir5203,novel_mir217,novel_mir215,novel_mir3661,novel_mir1262,novel_mir4278,novel_mir3948,novel_mir4262,novel_mir4783	7mer-m8	NA	-32.27	175	Gnmt	GO:0005737,GO:0016594,GO:0005542,GO:0017174,GO:0006555,GO:0006111,GO:0032259,GO:0006730,GO:0051289,GO:0005977,GO:0046500,	K00552|1|1.3e-172|609.8|mmu:14711|glycine N-methyltransferase [EC:2.1.1.20]	gi|6754026|ref|NP_034451.1|	0	glycine N-methyltransferase [Mus musculus]
NM_031872.2	novel_mir2969,novel_mir5770,novel_mir5878,novel_mir2287,novel_mir4769,novel_mir801,novel_mir180,novel_mir989,novel_mir102,novel_mir1549,novel_mir4661,novel_mir758,novel_mir3412,novel_mir5181,novel_mir555,novel_mir2191,novel_mir832,novel_mir3745,novel_mir3579,novel_mir659,novel_mir2799,novel_mir442,novel_mir2535,novel_mir437,novel_mir1432,novel_mir458,novel_mir1060,novel_mir5760,novel_mir1589,nove…	7mer-m8	NA	-26.43	153	Tas1r3	GO:0005887,GO:1903767,GO:0004930,GO:0033041,GO:0005515,GO:0050917,GO:0007186,GO:0001582,	K04626|1|0.0e+00|1753.8|mmu:83771|taste receptor type 1 member 3	gi|13994201|ref|NP_114078.1|	0	taste receptor type 1 member 3 precursor [Mus musculus]
NM_026796.1	novel_mir1591,novel_mir1284,novel_mir5084,novel_mir176,novel_mir436,novel_mir1526,novel_mir3409,novel_mir3948,mmu-miR-298-5p,novel_mir95,novel_mir1691,novel_mir6150,novel_mir453,novel_mir588,novel_mir4961,novel_mir2124,novel_mir1119,novel_mir2043,novel_mir1037,novel_mir3138,novel_mir2926,novel_mir1841,novel_mir2573,novel_mir351,novel_mir127,novel_mir486,novel_mir1345,novel_mir1856,novel_mir2831,n…	7mer-m8	NA	-21.6	146	Smyd2	GO:0005829,GO:0005634,GO:0009019,GO:0008174,GO:0002039,GO:0051994,GO:0046975,GO:0034541,GO:0018423,GO:0030792,GO:0000993,GO:0008650,GO:0016205,GO:0008988,GO:0034931,GO:0016428,GO:0043770,GO:0052735,GO:0008172,GO:0043791,GO:0046872,GO:0009008,GO:0071424,GO:0018707,GO:0043851,GO:0043782,GO:0043777,GO:0052666,GO:0043776,GO:0080012,GO:0052667,GO:0043780,GO:0016435,GO:0043834,GO:0009383,GO:0008425,GO:…	K11426|1|4.0e-258|894.4|mmu:226830|SET and MYND domain-containing protein	gi|30840984|ref|NP_081072.1|	0	N-lysine methyltransferase SMYD2 [Mus musculus]
NM_007953.2	novel_mir4831,novel_mir4554,novel_mir3081,novel_mir1519,novel_mir913,novel_mir986,novel_mir3141,novel_mir3485,novel_mir3738,mmu-miR-328-3p,novel_mir300,novel_mir354,novel_mir4228,novel_mir4489,novel_mir1835,novel_mir193,novel_mir4638,novel_mir4874,mmu-miR-324-3p,novel_mir4411,novel_mir841,novel_mir531,novel_mir5861,novel_mir572,novel_mir1762,novel_mir5319,novel_mir209,novel_mir4859,novel_mir632,n…	7mer-m8	NA	-44.93	308	Esrra	-	K08552|1|1.3e-262|909.8|hgl:101725053|estrogen-related receptor alpha	gi|569007318|ref|XP_006527173.1|	0	PREDICTED: steroid hormone receptor ERR1 isoform X1 [Mus musculus]
NM_033572.2	novel_mir4831,novel_mir1875,novel_mir2973,novel_mir259,novel_mir913,novel_mir1472,novel_mir622,novel_mir3188,novel_mir2332,mmu-miR-328-3p,novel_mir2526,novel_mir4282,novel_mir2912,novel_mir295,novel_mir243,novel_mir978,novel_mir3862,novel_mir3802,novel_mir531,novel_mir86,novel_mir1762,novel_mir5650,novel_mir1377,novel_mir1094,novel_mir457,novel_mir103,novel_mir247,novel_mir3610,novel_mir4380,nove…	6mer	NA	-26.69	161	Wbscr16	GO:0005739,GO:0005087,	K10615|1|5.3e-30|137.1|dpte:113798919|E3 ubiquitin-protein ligase HERC4 [EC:2.3.2.26]!K10614|5|3.5e-29|134.4|asn:102382292|E3 ubiquitin-protein ligase HERC3 [EC:2.3.2.26]	gi|568938342|ref|XP_006504600.1|	0	PREDICTED: Williams-Beuren syndrome chromosomal region 16 protein homolog isoform X1 [Mus musculus]
NM_175462.4	novel_mir112,novel_mir3579,novel_mir1468,novel_mir673,novel_mir875,novel_mir1040,novel_mir1194,novel_mir832,novel_mir2163,novel_mir1322,novel_mir238,novel_mir282,novel_mir448,novel_mir437,novel_mir1432,mmu-miR-183-5p,novel_mir955,novel_mir4478,novel_mir2100,novel_mir201,novel_mir1579,novel_mir378,novel_mir4481,novel_mir3486,novel_mir1741,novel_mir6081,novel_mir2396,novel_mir1007,mmu-miR-92a-1-5p,…	6mer	NA	-20.64	156	Kcnt1	-	K04946|1|0.0e+00|2478.7|rno:60444|potassium channel subfamily T member 1	gi|755497362|ref|XP_006497952.2|	0	PREDICTED: potassium channel subfamily T member 1 isoform X10 [Mus musculus]
NM_172297.1	novel_mir2143,novel_mir4387,novel_mir5272,mmu-miR-702-3p,novel_mir2894,novel_mir1554,novel_mir124,novel_mir879,novel_mir1734,novel_mir1520,novel_mir5056,novel_mir4897,novel_mir383,novel_mir4111,novel_mir3297,novel_mir5746,novel_mir5609,novel_mir2773,novel_mir1439,novel_mir1715,novel_mir121,novel_mir3872,novel_mir3413,novel_mir4318,novel_mir360,novel_mir186,mmu-miR-138-5p,novel_mir830,novel_mir447…	6mer	NA	-21.1	150	Ccdc9	-	K19607|1|2.5e-15|88.2|sasa:106586668|X-linked retinitis pigmentosa GTPase regulator	gi|210147500|ref|NP_758501.2|	0	coiled-coil domain-containing protein 9 isoform 2 [Mus musculus]
NM_146089.2	novel_mir3323,novel_mir4228,novel_mir618	6mer	NA	-20.13	146	Haus1	GO:0005737,GO:0070652,GO:0005813,GO:0000922,GO:0005874,GO:0051225,GO:0051301,	K16584|1|2.3e-147|525.8|mmu:225745|HAUS augmin-like complex subunit 1	gi|22122593|ref|NP_666201.1|	0	HAUS augmin-like complex subunit 1 [Mus musculus]
NM_177374.4	novel_mir3854,novel_mir66,novel_mir1338,novel_mir500,novel_mir1184,novel_mir527,novel_mir4520,novel_mir2573,novel_mir1018,novel_mir387,mmu-miR-7682-3p,novel_mir3475,novel_mir4204,novel_mir4380,mmu-miR-6943-3p,novel_mir588,novel_mir4134,novel_mir4968,novel_mir1368,novel_mir1791,novel_mir2214,novel_mir517,novel_mir2117,novel_mir1595,novel_mir1873,novel_mir2616,novel_mir1874,novel_mir5764,novel_mir5…	6mer	NA	-53.26	307	Trmt61a	GO:0031515,GO:0005634,GO:0016429,GO:0030488,	K07442|1|3.4e-168|596.3|mmu:328162|tRNA (adenine57-N1/adenine58-N1)-methyltransferase catalytic subunit [EC:2.1.1.219 2.1.1.220]	gi|152963551|ref|NP_796348.2|	0	tRNA (adenine(58)-N(1))-methyltransferase catalytic subunit TRMT61A [Mus musculus]
NM_028072.5	novel_mir3682,novel_mir5522,novel_mir2585,novel_mir1369,novel_mir585,novel_mir3951,novel_mir3618,novel_mir4027,novel_mir1242,novel_mir1542,novel_mir1423,novel_mir4202,novel_mir3912,novel_mir5596,novel_mir456,novel_mir137,novel_mir6103,novel_mir2286,novel_mir837,novel_mir2047,novel_mir2840,novel_mir1381,novel_mir1183,novel_mir3544,novel_mir6071,novel_mir118,novel_mir867,novel_mir1467,novel_mir5128…	6mer	NA	-22.02	148	Sulf2	-	K14607|1|0.0e+00|1844.3|mmu:72043|extracellular sulfatase Sulf [EC:3.1.6.-]	gi|357588455|ref|NP_001239508.1|	0	extracellular sulfatase Sulf-2 isoform 2 [Mus musculus]
NM_001163247.1	novel_mir2755,novel_mir4203,novel_mir2324,novel_mir84,novel_mir1377,mmu-miR-3095-3p,novel_mir2270,mmu-miR-204-3p,novel_mir5741,novel_mir5943,novel_mir3372,mmu-miR-26a-5p,novel_mir356,novel_mir2868,novel_mir3533,novel_mir1042,novel_mir4155,novel_mir2394,novel_mir5846,novel_mir2312,novel_mir1259,novel_mir4822,novel_mir5594,novel_mir4090,novel_mir2371,novel_mir975,novel_mir5789,novel_mir183,mmu-miR-…	6mer	NA	-27.23	154	Birc7	GO:0005794,GO:0005876,GO:0005634,GO:0070740,GO:0070738,GO:0043773,GO:0008270,GO:0043774,GO:0004842,GO:0008766,GO:0070736,GO:0070737,GO:0004869,GO:0018169,GO:0042127,GO:0016567,GO:0090307,GO:0009966,GO:0070247,GO:1990001,	K16061|1|4.6e-171|604.7|mmu:329581|baculoviral IAP repeat-containing protein 7/8	gi|568920325|ref|XP_006500728.1|	0	PREDICTED: baculoviral IAP repeat-containing protein 7 isoform X1 [Mus musculus]
NM_019499.4	novel_mir1353,novel_mir4954,mmu-miR-6900-3p,novel_mir2816,novel_mir4596,novel_mir4551,novel_mir2295,novel_mir1270,novel_mir645,novel_mir1520,novel_mir1809,novel_mir326,novel_mir150,novel_mir3179,novel_mir2106,novel_mir1209,novel_mir1259,novel_mir34,novel_mir2799,novel_mir4656,novel_mir2906,novel_mir5024,novel_mir4976,novel_mir4382,mmu-miR-27b-3p,novel_mir2173,mmu-miR-193b-5p,novel_mir4203,novel_m…	6mer	NA	-20.32	152	Mad2l1	GO:0072686,GO:0005829,GO:0005643,GO:0000776,GO:0048471,GO:0000922,GO:0042803,GO:0043066,GO:0051301,GO:0090267,GO:1904667,GO:0042177,	K02537|1|2.7e-111|406.8|mmu:56150|mitotic spindle assembly checkpoint protein MAD2	gi|31543218|ref|NP_062372.2|	1.70123e-149	mitotic spindle assembly checkpoint protein MAD2A [Mus musculus]
NM_146078.3	novel_mir4380,novel_mir3475,novel_mir1175,novel_mir146,mmu-miR-298-5p,novel_mir1225,novel_mir1292,novel_mir1488,novel_mir1495,novel_mir5456,mmu-miR-6943-3p,novel_mir4902,novel_mir4551,novel_mir5111,novel_mir3007,novel_mir5313,novel_mir5789,novel_mir500,novel_mir3200,mmu-miR-24-3p,novel_mir1338,novel_mir2573,novel_mir372,novel_mir859,novel_mir983,novel_mir387,novel_mir1701,novel_mir5856,mmu-miR-46…	6mer	NA	-22.07	151	Ubr2	GO:0000785,GO:0005654,GO:0005737,GO:0000151,GO:0005886,GO:0070740,GO:0043773,GO:0070738,GO:0005515,GO:0008270,GO:0070728,GO:0043774,GO:0008766,GO:0070736,GO:0070737,GO:0018169,GO:0061630,GO:0032007,GO:0033522,GO:0007283,GO:0007141,GO:0006342,GO:0071233,GO:0071596,	K10626|1|0.0e+00|3400.5|cge:100767969|E3 ubiquitin-protein ligase UBR2 [EC:2.3.2.27]	gi|58615693|ref|NP_666190.2|	0	E3 ubiquitin-protein ligase UBR2 isoform 1 [Mus musculus]
NM_013551.2	novel_mir4763,mmu-miR-449a-5p,novel_mir2279,novel_mir2535,mmu-miR-671-5p,novel_mir5812,novel_mir4926,mmu-miR-34b-5p,novel_mir1322,novel_mir4572,novel_mir4181,novel_mir5688,novel_mir1572,novel_mir299,novel_mir4479,novel_mir2646,novel_mir3878,novel_mir4399,novel_mir3231,mmu-miR-34c-5p,novel_mir317,novel_mir4902,novel_mir180,novel_mir3536,novel_mir4840,mmu-miR-23b-5p,mmu-miR-34a-5p,novel_mir2615,nov…	7mer-m8	NA	-20.16	145	Hmbs	GO:0005737,GO:0030424,GO:0000793,GO:0005634,GO:0005515,GO:0043176,GO:0031406,GO:0050662,GO:0004418,GO:0004852,GO:0043200,GO:0051597,GO:0071549,GO:0031100,GO:0006782,GO:0071284,GO:0032355,GO:0009743,GO:0018160,GO:0071236,GO:0010043,GO:0001666,GO:0033273,GO:0071418,GO:0042493,GO:0071243,GO:0071345,GO:0032025,GO:0048708,	K01749|1|2.6e-201|705.7|mmu:15288|hydroxymethylbilane synthase [EC:2.5.1.61]	gi|159110431|ref|NP_038579.2|	0	porphobilinogen deaminase isoform 1 [Mus musculus]
NM_008945.3	mmu-miR-3470b,mmu-miR-346-5p,novel_mir5139,novel_mir1358,novel_mir4304,novel_mir2218,novel_mir2633,novel_mir1451,novel_mir2420	7mer-m8	NA	-20.1	151	Psmb4	GO:0070062,GO:0005737,GO:0005839,GO:0005634,GO:0004298,GO:0001530,GO:0051603,GO:0002862,	K02736|1|5.6e-151|537.7|mmu:19172|20S proteasome subunit beta 7 [EC:3.4.25.1]	gi|254540082|ref|NP_032971.2|	0	proteasome subunit beta type-4 precursor [Mus musculus]
NM_008149.3	novel_mir1204,novel_mir1326,novel_mir683,novel_mir3029,novel_mir1376,novel_mir2955,novel_mir392,novel_mir1924,novel_mir21,novel_mir955,novel_mir4441,novel_mir2673,novel_mir1432,novel_mir1322,novel_mir1399,novel_mir3294,novel_mir1194,novel_mir3579,mmu-miR-425-3p,novel_mir5575,novel_mir2032,novel_mir3412,novel_mir3385,novel_mir613,novel_mir168,mmu-miR-674-3p,novel_mir368,novel_mir3353,novel_mir2222…	6mer	NA	-22.89	147	Gpam	GO:0005743,GO:0005741,GO:0016021,GO:0005886,GO:0004366,GO:0009750,GO:0009749,GO:0055089,GO:0042104,GO:0032869,GO:0070236,GO:0014823,GO:0040018,GO:0051607,GO:0055091,GO:0010867,GO:0006631,GO:0016024,GO:0006637,GO:0046686,GO:0070970,GO:0050707,GO:0031667,	K00629|1|0.0e+00|1650.6|mmu:14732|glycerol-3-phosphate O-acyltransferase 1/2 [EC:2.3.1.15]	gi|34536827|ref|NP_032175.2|	0	glycerol-3-phosphate acyltransferase 1, mitochondrial [Mus musculus]
NM_026636.2	novel_mir750,novel_mir4525,novel_mir788,novel_mir5770,novel_mir2859,novel_mir5806,novel_mir3662,novel_mir56,novel_mir5065,novel_mir959,mmu-miR-24-3p,novel_mir527,novel_mir4614,novel_mir4520,novel_mir1053,novel_mir136,novel_mir6033,novel_mir2972,novel_mir604,novel_mir4376,novel_mir5399,novel_mir2253,novel_mir1585,novel_mir3908,novel_mir2012,novel_mir871,novel_mir3752,novel_mir2863,novel_mir90,nove…	6mer	NA	-20.57	157	Babam1	GO:0070552,GO:0070531,GO:0005737,GO:0045739,GO:0010212,GO:0031572,GO:0006302,GO:0051301,GO:0070536,GO:0016569,	K20776|1|2.2e-192|676.0|mmu:68251|BRISC and BRCA1-A complex member 1	gi|755526007|ref|XP_011240625.1|	0	PREDICTED: BRISC and BRCA1-A complex member 1 isoform X1 [Mus musculus]
NM_025623.2	novel_mir5557,novel_mir1425,novel_mir666,novel_mir3671,novel_mir6013,novel_mir4304,novel_mir381,novel_mir2940,novel_mir4685,novel_mir5594,novel_mir2215,novel_mir2310,novel_mir4592,novel_mir1794,novel_mir918,novel_mir4312,novel_mir4236,novel_mir1715,novel_mir3954,novel_mir4393,mmu-miR-467a-5p,novel_mir1439,novel_mir784,novel_mir3785,novel_mir2422,novel_mir855,novel_mir5257,mmu-miR-191-3p,novel_mir…	7mer-1a	NA	-23.1	140	Nipsnap3b	GO:0005634,GO:0005739,	-	gi|568927216|ref|XP_006538237.1|	2.89261e-146	PREDICTED: protein NipSnap homolog 3B isoform X1 [Mus musculus]
NM_008176.3	novel_mir1509,novel_mir1851,novel_mir381,novel_mir802,novel_mir5805,novel_mir5760,novel_mir308,novel_mir5614,novel_mir807,novel_mir5376,novel_mir442,novel_mir5596	7mer-1a	NA	-21.78	150	Cxcl1	GO:0005623,GO:0005615,GO:0008083,GO:0008009,GO:0045236,GO:0007186,GO:0032496,GO:0007204,GO:0010332,GO:0001975,GO:0002526,GO:0090023,GO:0070965,GO:0043268,GO:0006955,GO:0010765,GO:0032355,GO:0032930,GO:0051384,GO:1902035,GO:0009408,GO:0070098,	K05505|1|5.8e-47|192.2|mmu:14825|C-X-C motif chemokine 1/2/3	gi|54887349|gb|AAH37997.1|	1.79438e-62	Cxcl1 protein, partial [Mus musculus]
NM_027616.3	novel_mir820,mmu-miR-1970,novel_mir5210,novel_mir4776,novel_mir5400,novel_mir2564,novel_mir3325,novel_mir168,novel_mir2275,novel_mir1367,novel_mir4832,novel_mir297,novel_mir5908,novel_mir5755,novel_mir87,novel_mir2483,novel_mir2016,novel_mir435,novel_mir899,novel_mir310,novel_mir1907,novel_mir5666,novel_mir496,novel_mir1960,mmu-miR-330-3p,novel_mir3246,novel_mir2541,novel_mir191,novel_mir4308,nov…	8mer-1a	NA	-59.32	321	Ccdc178	-	K16464|1|1.6e-22|112.8|amex:103036019|centrosomal protein CEP250!K20478|4|1.7e-21|109.4|salp:112080544|golgin subfamily B member 1	gi|268839333|ref|NP_081892.2|	0	coiled-coil domain-containing protein 178 [Mus musculus]
NM_205783.2	novel_mir5196,novel_mir1575,novel_mir4738,novel_mir5076,novel_mir323,novel_mir1764,novel_mir1648,mmu-miR-149-5p,novel_mir2474,novel_mir761,novel_mir3530,novel_mir1647,novel_mir1193,novel_mir1838,novel_mir409,novel_mir2001,novel_mir397,novel_mir4273,novel_mir1603,novel_mir5888,novel_mir3416,novel_mir4361,novel_mir5078,novel_mir5549,novel_mir1467,novel_mir841,novel_mir2817,novel_mir1249,novel_mir53…	7mer-m8	NA	-21.26	148	Chrm5	GO:0005887,GO:0045211,GO:0030054,GO:0016934,GO:0016907,GO:0007207,GO:0015872,GO:0001696,GO:0007197,GO:0019226,GO:0007271,GO:0060304,	K04133|1|2.5e-298|1028.1|rno:53949|muscarinic acetylcholine receptor M5	gi|254675187|ref|NP_991352.2|	0	muscarinic acetylcholine receptor M5 [Mus musculus]
NM_025338.4	novel_mir5354,mmu-miR-322-5p,mmu-miR-6948-3p,novel_mir3805,novel_mir4103,novel_mir2660,novel_mir5407,mmu-miR-15a-5p	6mer	NA	-20.6	147	Aurkaip1	GO:0016301,GO:0016310,	K16830|1|6.5e-112|408.3|mmu:66077|aurora kinase A-interacting protein	gi|13384706|ref|NP_079614.1|	2.09157e-144	aurora kinase A-interacting protein [Mus musculus]
NM_008554.3	novel_mir4920,novel_mir95,mmu-miR-298-5p,novel_mir3326,novel_mir280,novel_mir554,novel_mir4961,novel_mir2554,novel_mir549,novel_mir894,novel_mir465,novel_mir2402,mmu-miR-6954-3p,novel_mir887,novel_mir2626,novel_mir475,novel_mir1902,novel_mir1508,novel_mir158,novel_mir348,novel_mir1340,novel_mir5091,novel_mir1314,novel_mir4520,novel_mir2477,novel_mir613,novel_mir251,novel_mir685,novel_mir202,novel…	8mer-1a	NA	-21.61	163	Ascl2	GO:0090575,GO:0005737,GO:0000978,GO:0046983,GO:0001078,GO:0070888,GO:0000122,GO:0001666,GO:0060708,GO:0035019,GO:0010626,	K09067|1|9.8e-148|527.7|mmu:17173|achaete-scute complex protein	gi|66792798|ref|NP_032580.2|	0	achaete-scute homolog 2 [Mus musculus]
NR_110407.1	novel_mir5938,novel_mir3250,novel_mir1607	7mer-m8	NA	-21.12	146	Cyp2r1	-	-	-	-	-
NM_172143.2	novel_mir5920,novel_mir5359,novel_mir4737,novel_mir2150,novel_mir3769,novel_mir5984,novel_mir2155,novel_mir1613,novel_mir3780	7mer-1a	NA	-46.93	305	Ofcc1	GO:0015630,GO:0005829,GO:0005783,GO:0048471,	-	gi|256818800|ref|NP_742155.2|	0	orofacial cleft 1 candidate gene 1 protein homolog [Mus musculus]
NM_013750.2	novel_mir1720,novel_mir1157,novel_mir4149,novel_mir679,novel_mir554,novel_mir358,novel_mir2703,novel_mir465,novel_mir671,novel_mir4308,novel_mir4854,novel_mir4323,novel_mir308,novel_mir1837,mmu-miR-1197-3p,novel_mir171,mmu-miR-874-3p,mmu-miR-193a-5p,novel_mir3518,novel_mir3745,novel_mir1813,novel_mir2941,novel_mir2163,novel_mir955,novel_mir4441,novel_mir729,novel_mir3512,novel_mir4451,novel_mir23…	8mer-1a	NA	-23	159	Phlda3	GO:0070062,GO:0005737,GO:0005886,GO:0010314,GO:0005547,GO:0032266,GO:0005546,GO:0080025,GO:0043325,GO:0051898,GO:0042771,GO:0043065,	-	gi|7305377|ref|NP_038778.1|	8.53466e-86	pleckstrin homology-like domain family A member 3 [Mus musculus]
NM_199065.2	novel_mir146,novel_mir2726,novel_mir491,novel_mir142,novel_mir3642,novel_mir2541,novel_mir4968,novel_mir1844,novel_mir5325,mmu-miR-298-5p,novel_mir2366,novel_mir500,novel_mir1037,mmu-miR-7058-5p,novel_mir2360,mmu-miR-24-3p,novel_mir1338,novel_mir2043,novel_mir3474,novel_mir1187,novel_mir136,novel_mir251,novel_mir174,novel_mir1018,novel_mir2994,novel_mir4520,novel_mir2132,novel_mir4699,novel_mir19…	7mer-m8	NA	-20.12	143	Slitrk1	GO:0016021,GO:0035264,GO:0042592,GO:0007409,GO:0051965,GO:0030534,	K06839|1|2.7e-27|129.0|nvi:100124255|slit 2	gi|51371941|ref|NP_951020.1|	0	SLIT and NTRK-like protein 1 precursor [Mus musculus]
NM_030688.2	novel_mir5632,novel_mir435,novel_mir2799,novel_mir4744,novel_mir272,novel_mir2639,novel_mir5193,novel_mir191,mmu-miR-26b-3p	7mer-1a	NA	-20.54	155	Il1rapl2	GO:0016021,GO:0004910,GO:0007165,	K05170|1|0.0e+00|1396.7|mmu:60367|interleukin 1 receptor accessory protein-like	gi|13507616|ref|NP_109613.1|	0	X-linked interleukin-1 receptor accessory protein-like 2 precursor [Mus musculus]
NM_010852.2	novel_mir2024,novel_mir1684,novel_mir2183,novel_mir2632,novel_mir5245,novel_mir1253,novel_mir5679,novel_mir5342,novel_mir5414,novel_mir6114,novel_mir5328,novel_mir2069,novel_mir3951,novel_mir585,novel_mir1369,novel_mir903,novel_mir264,novel_mir3994,mmu-miR-423-5p,novel_mir1817,novel_mir213,novel_mir4588,novel_mir1380,mmu-miR-27a-3p,novel_mir6120,mmu-miR-1964-5p,novel_mir1240,novel_mir2517,novel_m…	6mer	NA	-20.1	151	Myef2	GO:0005654,GO:0005737,	K12887|1|1.2e-125|455.3|tup:102500644|heterogeneous nuclear ribonucleoprotein M	gi|244790087|ref|NP_001155889.1|	0	myelin expression factor 2 isoform 1 [Mus musculus]
NM_025387.3	mmu-miR-191-3p,novel_mir3919,novel_mir5447,novel_mir234,novel_mir3832,novel_mir1264,novel_mir184,novel_mir155,novel_mir4127,novel_mir1472,novel_mir952,novel_mir133,novel_mir1537,novel_mir5299,novel_mir1582,mmu-miR-7052-3p,novel_mir1003,novel_mir1610,novel_mir6034,novel_mir2586,novel_mir2654,novel_mir1781,novel_mir260,novel_mir1229,novel_mir1054,novel_mir121,novel_mir5861,novel_mir409,novel_mir186…	7mer-m8	NA	-20.33	140	Tmem14c	GO:0016021,GO:0005743,GO:0006839,GO:0030218,GO:0070453,	-	gi|13384766|ref|NP_079663.1|	4.5399e-74	transmembrane protein 14C [Mus musculus]
NM_022721.3	novel_mir2564,novel_mir2178,novel_mir6142,novel_mir1338,novel_mir3071,novel_mir4516,novel_mir1396,novel_mir251,novel_mir4462,novel_mir387,novel_mir142,novel_mir3475,novel_mir2379,novel_mir588,novel_mir5456,mmu-miR-298-5p,novel_mir1292,novel_mir4961,novel_mir3515,novel_mir496,novel_mir2270,novel_mir3078,novel_mir921,novel_mir271,novel_mir2922,novel_mir5395,novel_mir3628,novel_mir2020,novel_mir6109…	6mer	NA	-24.17	161	Fzd5	GO:0009986,GO:0016021,GO:0005923,GO:0000139,GO:0005886,GO:0048471,GO:0005769,GO:0031625,GO:0004930,GO:0017147,GO:0042813,GO:0019901,GO:1901382,GO:0008595,GO:0032729,GO:0044332,GO:0060718,GO:0002726,GO:0035567,GO:0043507,GO:0060061,GO:2000810,GO:0033077,GO:1903146,GO:0060715,GO:0045944,GO:0060561,GO:0060828,GO:0060670,GO:0008285,GO:0007186,GO:0031077,GO:0001525,GO:0060716,GO:0048596,GO:1903955,GO:…	K02375|1|0.0e+00|1246.5|ngi:103744444|frizzled 5/8	gi|47059488|ref|NP_073558.2|	0	frizzled-5 precursor [Mus musculus]
NM_010362.3	novel_mir199,novel_mir835,novel_mir1585,novel_mir3277,novel_mir149,novel_mir2408,novel_mir448,novel_mir1066,novel_mir2140,novel_mir555,novel_mir170,novel_mir1010,novel_mir279,mmu-miR-449a-5p,novel_mir5796,novel_mir3972,novel_mir3745,novel_mir1073,novel_mir546,novel_mir1204,novel_mir5681,novel_mir1223,novel_mir484,novel_mir2423,novel_mir4333,novel_mir262,novel_mir521,novel_mir898,novel_mir4124,nov…	6mer	NA	-24.24	155	Gsto1	GO:0005604,GO:0031965,GO:0044297,GO:0043209,GO:0005829,GO:0030424,GO:0070062,GO:0045174,GO:0004364,GO:0050610,GO:0060316,GO:0098869,GO:0019853,GO:0010880,GO:0060315,GO:0042178,GO:0071243,GO:0006749,GO:0055114,	K00799|1|5.2e-138|495.0|mmu:14873|glutathione S-transferase [EC:2.5.1.18]	gi|6754090|ref|NP_034492.1|	3.09169e-179	glutathione S-transferase omega-1 [Mus musculus]
NM_011031.2	novel_mir1619,novel_mir245,novel_mir5995,novel_mir2236,novel_mir879,novel_mir5326,novel_mir4247,novel_mir508,novel_mir429,novel_mir240,novel_mir45,novel_mir488,novel_mir5698,novel_mir3263,novel_mir3784,novel_mir789,novel_mir3206,novel_mir5364,novel_mir189,novel_mir738,novel_mir2972,novel_mir2215,novel_mir3434,novel_mir3103,novel_mir4781,novel_mir4376,novel_mir5373,novel_mir1961,novel_mir1168,nove…	7mer-1a	NA	-21.71	143	P4ha2	GO:0016222,GO:0005634,GO:0004656,GO:0016702,GO:0031418,GO:0005515,GO:0005506,GO:0055114,GO:0018401,	K00472|1|2.9e-310|1068.1|cge:100760683|prolyl 4-hydroxylase [EC:1.14.11.2]	gi|148701600|gb|EDL33547.1|	0	procollagen-proline, 2-oxoglutarate 4-dioxygenase (proline 4-hydroxylase), alpha II polypeptide, isoform CRA_e, partial [Mus musculus]
NM_001081229.1	novel_mir2147,novel_mir5970,novel_mir4913,novel_mir3139,novel_mir1875,novel_mir1167,novel_mir214,novel_mir2127,novel_mir5519,novel_mir3717,novel_mir183,novel_mir1030,novel_mir164,novel_mir1443,novel_mir243,novel_mir295,novel_mir2508,novel_mir2593,novel_mir4282,novel_mir4982,novel_mir531,novel_mir2158,novel_mir1012,novel_mir935,mmu-miR-324-3p,novel_mir3705,novel_mir5594,novel_mir632,novel_mir1733,…	8mer-1a	NA	-20.34	145	Tsc22d2	-	K03129|1|6.6e-12|79.0|mmu:228980|transcription initiation factor TFIID subunit 4!K15033|2|8.6e-12|78.6|nai:NECAME_13551|peptidyl-tRNA hydrolase ICT1 [EC:3.1.1.29]!K22016|3|8.6e-12|78.6|tup:102472440|mucin-3/17	gi|124487001|ref|NP_001074698.1|	0	TSC22 domain family protein 2 [Mus musculus]
NM_025857.2	novel_mir4027,novel_mir1242,novel_mir4056,novel_mir429,novel_mir5590,novel_mir755,novel_mir4797,novel_mir1423,novel_mir4202,novel_mir1096,novel_mir439,novel_mir1429,novel_mir364,novel_mir4335,novel_mir1130,novel_mir2406,novel_mir2225,novel_mir1183,novel_mir4209,novel_mir1458,novel_mir456,novel_mir6147,novel_mir3655,novel_mir2249,novel_mir3044,novel_mir976,novel_mir4452,mmu-miR-497a-5p,novel_mir35…	6mer	NA	-29.98	156	Aagab	GO:0005654,GO:0005737,GO:0015031,	K00710|1|5.6e-20|104.0|dpte:113792733|polypeptide N-acetylgalactosaminyltransferase [EC:2.4.1.41]	gi|148694096|gb|EDL26043.1|	0	mCG9286, isoform CRA_a, partial [Mus musculus]
NM_173752.4	novel_mir2683,novel_mir98,novel_mir1086,novel_mir3150,mmu-miR-500-3p,novel_mir1394,novel_mir4194,novel_mir3908,novel_mir386,novel_mir2514,novel_mir3358,novel_mir2583,novel_mir4699,novel_mir1795,novel_mir4783,novel_mir5285,novel_mir5785,mmu-miR-365-2-5p,novel_mir15,novel_mir233,novel_mir2561,novel_mir5226,novel_mir677,novel_mir2916,novel_mir5817,novel_mir1201,novel_mir1128,novel_mir495,novel_mir10…	8mer-1a	NA	-20.43	146	Lgalsl	-	K06832|1|3.1e-24|118.6|bfo:BRAFLDRAFT_126856|galectin-8!K10093|2|1.3e-19|103.2|crg:105322757|galectin-9	gi|537273921|gb|ERE92512.1|	2.84414e-118	galectin-related protein A-like protein [Cricetulus griseus]
XM_006532191.3	novel_mir578,novel_mir4259,novel_mir853,novel_mir316,novel_mir2899,novel_mir1460,novel_mir5882,novel_mir813,novel_mir4413,novel_mir5765,novel_mir1492,novel_mir1657,novel_mir5182,novel_mir1502,novel_mir2748,novel_mir945,novel_mir4046,novel_mir2765,novel_mir773,novel_mir4018,novel_mir4203,novel_mir3567,novel_mir561,novel_mir696,novel_mir4987,novel_mir2801,novel_mir1817,novel_mir952,novel_mir4525,no…	6mer	NA	-21.18	145	Flot2	GO:0005925,GO:0044291,GO:0030027,GO:0005913,GO:0016323,GO:0030139,GO:0016600,GO:0005768,GO:0001931,GO:0048471,GO:0070062,GO:0030864,GO:0002080,GO:0016324,GO:0046982,GO:0035255,GO:0002020,GO:0045661,GO:0034114,GO:0010629,GO:0001765,GO:0050821,GO:0034139,GO:1903905,GO:0044860,GO:1902992,	K07192|1|9.1e-231|804.3|rno:83764|flotillin	gi|13929186|ref|NP_114018.1|	0	flotillin-2 isoform 1 [Rattus norvegicus]
NM_024479.2	novel_mir1464,novel_mir500,novel_mir2918,novel_mir3138,novel_mir166,novel_mir6098,novel_mir278,novel_mir3325,novel_mir4462,novel_mir640,novel_mir4520,novel_mir1113,novel_mir1287,novel_mir650,novel_mir146,novel_mir4796,novel_mir1907,novel_mir1702,novel_mir4380,novel_mir764,novel_mir1591,novel_mir1119,novel_mir1165,novel_mir220,novel_mir588,novel_mir95,novel_mir644,novel_mir1578,novel_mir2755,novel…	6mer	NA	-62.45	306	Wbscr27	GO:0005737,GO:0008757,GO:0032259,	-	gi|568938312|ref|XP_006504585.1|	0	PREDICTED: Williams-Beuren syndrome chromosomal region 27 protein isoform X2 [Mus musculus]
NM_008131.4	novel_mir5164,novel_mir1637,novel_mir244,novel_mir1229,novel_mir5952,novel_mir4718,novel_mir20,novel_mir357,novel_mir4508,novel_mir4219,novel_mir4045,mmu-miR-532-3p,novel_mir414,novel_mir5852,novel_mir1245,novel_mir2286,novel_mir400,novel_mir2411,novel_mir129,novel_mir1321,novel_mir141,novel_mir2337,novel_mir618,novel_mir2840,novel_mir2538,novel_mir959,novel_mir1458,novel_mir6031,novel_mir2611,no…	6mer	NA	-20.41	145	Glul	GO:0043679,GO:0043209,GO:0043234,GO:0097386,GO:0070062,GO:0005791,GO:0005634,GO:0043204,GO:0005739,GO:0030145,GO:0045503,GO:0016595,GO:0042802,GO:0000287,GO:0004351,GO:0004356,GO:0005524,GO:0051968,GO:0009749,GO:0006542,GO:0050679,GO:0051260,GO:0019676,GO:0009267,GO:0032024,	K01915|1|1.4e-229|800.4|mmu:14645|glutamine synthetase [EC:6.3.1.2]	gi|31982332|ref|NP_032157.2|	0	glutamine synthetase [Mus musculus]
XM_006527932.2	novel_mir2730,novel_mir4737,mmu-miR-219a-2-3p,novel_mir771,novel_mir5503,novel_mir1740,novel_mir1133,novel_mir3414,mmu-miR-15a-3p,novel_mir1768,novel_mir3332,novel_mir389,novel_mir2429,novel_mir700,novel_mir1482,novel_mir1656,novel_mir2639,novel_mir5920,novel_mir4758,novel_mir3734,novel_mir3634,novel_mir4396,novel_mir916,novel_mir5254,novel_mir1698,novel_mir435,novel_mir4755,novel_mir4212,novel_m…	7mer-m8	NA	-21.64	164	Gpr174	-	K08391|1|1.5e-197|694.9|mmu:213439|G protein-coupled receptor 174	-	-	-
NM_027455.3	novel_mir2407,novel_mir523,novel_mir2541,novel_mir123,novel_mir1876,mmu-miR-671-5p,novel_mir6150,novel_mir913,novel_mir3045,novel_mir1689,novel_mir1500,novel_mir875,novel_mir1460,novel_mir5665,novel_mir1186,mmu-miR-1247-3p,novel_mir983,novel_mir4103,novel_mir1956,novel_mir3897,novel_mir3918,mmu-miR-124-3p,novel_mir685,novel_mir989,novel_mir1443,novel_mir2662,novel_mir5673,novel_mir5913,novel_mir1…	7mer-1a	NA	-23.53	148	Qpct	GO:0070062,GO:0016603,GO:0008270,GO:0017186,	K00683|1|3.6e-211|738.8|mmu:70536|glutaminyl-peptide cyclotransferase [EC:2.3.2.5]	gi|110625782|ref|NP_081731.1|	0	glutaminyl-peptide cyclotransferase isoform 1 precursor [Mus musculus]
XM_006503753.2	novel_mir1863,novel_mir2043,novel_mir2465,novel_mir2564,novel_mir5653,novel_mir1403,novel_mir174,novel_mir3999,novel_mir251,novel_mir2573,novel_mir2483,novel_mir2634,novel_mir425,novel_mir127,novel_mir1441,novel_mir764,novel_mir1290,novel_mir5776,novel_mir3813,novel_mir3246,novel_mir3770,novel_mir1844,novel_mir1402,novel_mir2324,novel_mir1541,novel_mir4673,novel_mir222,novel_mir2755,novel_mir4994…	7mer-m8	NA	-20.04	151	Ldb2	-	K15617|1|1.3e-167|594.3|ccw:104697894|LIM domain-binding protein 1	gi|568933813|ref|XP_006503820.1|	0	PREDICTED: LIM domain-binding protein 2 isoform X6 [Mus musculus]
NM_011025.4	novel_mir1443,novel_mir5503,novel_mir5100,novel_mir2550,novel_mir5182,novel_mir709,novel_mir4105,novel_mir1437,novel_mir5166,novel_mir4991,novel_mir859	7mer-m8	NA	-28.11	166	Oxt	GO:0005615,GO:0043195,GO:0030141,GO:0005185,GO:0031855,GO:0002027,GO:0009744,GO:0042713,GO:0035811,GO:0042711,GO:0070474,GO:0007204,GO:0007507,GO:0051965,GO:0032094,GO:0009612,GO:0051602,GO:0045776,GO:0060179,GO:0007613,GO:0060450,GO:0043207,GO:0007625,GO:0001975,GO:0030431,GO:0051930,GO:0045925,GO:0002125,GO:0035176,GO:0007567,GO:0042220,GO:0010701,GO:0014823,GO:0051384,GO:0032570,GO:0042755,GO:…	K05243|1|1.2e-73|280.0|mmu:18429|oxytocin-neurophysin 1	gi|568915773|ref|XP_006498973.1|	1.1629e-85	PREDICTED: oxytocin-neurophysin 1 isoform X1 [Mus musculus]
NM_001001985.3	novel_mir1230,novel_mir3686,novel_mir3312,novel_mir3766,novel_mir4320,novel_mir2717,novel_mir49,mmu-miR-7051-5p,novel_mir3998,novel_mir119,novel_mir2887,novel_mir4275,novel_mir1767,novel_mir3609,novel_mir770,novel_mir456,mmu-miR-152-3p,novel_mir445,novel_mir777,novel_mir3343,novel_mir1737,novel_mir2611,novel_mir1573,novel_mir248,novel_mir3420,novel_mir5253,novel_mir2184,novel_mir1050,novel_mir142…	7mer-m8	NA	-21.25	154	Nat8l	GO:0016021,GO:0031966,GO:0030867,GO:0017188,GO:0051586,	K18309|1|1.8e-171|608.6|mmu:269642|aspartate N-acetyltransferase [EC:2.3.1.17]	gi|134288912|ref|NP_001001985.3|	0	N-acetylaspartate synthetase [Mus musculus]
NM_010835.2	novel_mir3202,novel_mir387,novel_mir980,novel_mir2483,novel_mir3007,novel_mir645,novel_mir1338,novel_mir2465,novel_mir2615,novel_mir278,novel_mir2564,novel_mir496,novel_mir549,novel_mir343,novel_mir5759,novel_mir1216,novel_mir588,novel_mir3948,novel_mir318,novel_mir5860,novel_mir1508,novel_mir1002,novel_mir5300,novel_mir5084,novel_mir1907,novel_mir4114,novel_mir909,novel_mir6109,novel_mir4808,nov…	6mer	NA	-23.53	150	Msx1	-	K09341|1|7.1e-169|598.2|mmu:17701|homeobox protein MSX	-	-	-
NM_053268.2	novel_mir4800,novel_mir5465,novel_mir4246,novel_mir2261,novel_mir5061,novel_mir2064,novel_mir4203,novel_mir4018,novel_mir416,novel_mir5076,novel_mir4738,novel_mir6104,novel_mir4641,novel_mir513,novel_mir1531,novel_mir691,novel_mir4607,novel_mir701,novel_mir825,novel_mir578,novel_mir3899,novel_mir5049,novel_mir234,novel_mir5257,novel_mir3667,novel_mir5896,novel_mir5183,novel_mir3282,novel_mir4887,…	7mer-1a	NA	-20.75	147	Rasa2	GO:0005737,GO:0031235,GO:0005096,GO:0046872,GO:0046580,GO:0043547,	K08053|1|0.0e+00|1714.1|mmu:114713|Ras GTPase-activating protein 2	gi|114158699|ref|NP_444498.2|	0	ras GTPase-activating protein 2 [Mus musculus]
NM_015800.3	mmu-miR-195a-5p,mmu-miR-370-5p,novel_mir1186,novel_mir5689,novel_mir1995,novel_mir2822,novel_mir2594,novel_mir457,novel_mir5069,novel_mir3599,mmu-miR-7091-3p,novel_mir4101,novel_mir587,novel_mir4773,novel_mir3537,novel_mir632,novel_mir2353,mmu-miR-221-5p,novel_mir4717,mmu-miR-150-5p,mmu-miR-324-3p,novel_mir1263,novel_mir1138,novel_mir6114,novel_mir3179,novel_mir295,novel_mir969,novel_mir3582,nove…	7mer-1a	NA	-25.57	157	Crim1	-	K04657|1|1.5e-20|107.1|obi:106870547|chordin	gi|569000962|ref|XP_006524665.1|	0	PREDICTED: cysteine-rich motor neuron 1 protein isoform X2 [Mus musculus]
NM_007937.3	novel_mir5016,novel_mir5294,mmu-miR-149-5p,novel_mir5741,novel_mir1450,novel_mir2175,novel_mir4752,mmu-miR-196a-5p,novel_mir556,novel_mir3228,novel_mir2060,novel_mir5557,novel_mir1241,novel_mir4105,novel_mir2011,novel_mir4816,novel_mir690,novel_mir674,novel_mir6013,novel_mir432,novel_mir5508,novel_mir440,novel_mir2558,novel_mir265,novel_mir3915,novel_mir5008,novel_mir2442,novel_mir503,novel_mir71…	7mer-m8	NA	-22.29	148	Epha5	-	K05106|1|0.0e+00|1780.4|mmu:13839|Eph receptor A5 [EC:2.7.10.1]	gi|568935287|ref|XP_006534836.1|	0	PREDICTED: ephrin type-A receptor 5 isoform X4 [Mus musculus]
NM_009671.5	novel_mir2194,novel_mir2306,novel_mir2424,mmu-miR-370-3p,mmu-miR-15b-5p,novel_mir98,novel_mir1513,novel_mir1544,novel_mir5785,novel_mir4023,novel_mir333,novel_mir5807,novel_mir2583,novel_mir4374,novel_mir5464,novel_mir2760,novel_mir4402,novel_mir790,novel_mir2561,novel_mir909,novel_mir3280,novel_mir272,novel_mir713,novel_mir1661,novel_mir3372,novel_mir2871,novel_mir5658,novel_mir5599,novel_mir495…	7mer-1a	NA	-21.46	156	Ankfy1	GO:0005765,GO:0030904,GO:0070062,GO:0031410,GO:0005769,GO:0044354,GO:0010008,GO:1901981,GO:0017137,GO:0046872,GO:0042147,GO:0048549,GO:0090160,GO:0034058,GO:0032439,	K20129|1|0.0e+00|2323.9|mmu:11736|rabankyrin-5	gi|85702366|ref|NP_033801.4|	0	rabankyrin-5 [Mus musculus]
NM_173757.3	novel_mir616,novel_mir213,novel_mir1072,novel_mir622,mmu-miR-1943-3p,novel_mir1875,novel_mir926,novel_mir1004,novel_mir406,novel_mir5357,novel_mir2516,novel_mir1835,novel_mir2932,novel_mir4137,novel_mir3688,novel_mir2912,novel_mir363,novel_mir697,novel_mir5672,novel_mir1323,novel_mir3897,novel_mir702,novel_mir4236,novel_mir6091,novel_mir632,novel_mir1614,novel_mir2353,novel_mir209,mmu-miR-202-3p,…	6mer	NA	-22.93	146	Mrps27	-	K17406|1|2.0e-237|825.9|mmu:218506|small subunit ribosomal protein S27	gi|50980303|ref|NP_776118.2|	0	28S ribosomal protein S27, mitochondrial [Mus musculus]
NM_030165.3	novel_mir4792,novel_mir3332,novel_mir921,novel_mir842,novel_mir1326,novel_mir1628,novel_mir683,novel_mir1194,novel_mir664,novel_mir2596,novel_mir5239,novel_mir267,novel_mir2799,novel_mir1800,novel_mir1856,novel_mir4021,novel_mir3307,novel_mir1446,novel_mir717,novel_mir2194,novel_mir906,novel_mir5544,novel_mir2649,novel_mir4955,novel_mir1649,novel_mir3893,novel_mir4850,novel_mir1217,novel_mir26,no…	6mer	NA	-23.83	146	Csgalnact2	GO:0016021,GO:0032580,GO:0046872,GO:0047237,GO:0050650,GO:0050651,	K00746|1|0.0e+00|1102.4|mmu:78752|chondroitin sulfate N-acetylgalactosaminyltransferase 1/2 [EC:2.4.1.174 2.4.1.175]	gi|31560032|ref|NP_084441.3|	0	chondroitin sulfate N-acetylgalactosaminyltransferase 2 [Mus musculus]
NM_133666.3	novel_mir980,novel_mir1841,novel_mir4398,novel_mir184,novel_mir189,novel_mir6109,novel_mir4749,novel_mir2270,novel_mir725,novel_mir5658,novel_mir2871,novel_mir1736,novel_mir5217,mmu-miR-145a-5p,novel_mir2407,novel_mir1133,novel_mir324,novel_mir1003,novel_mir6064,novel_mir5811,novel_mir5646,novel_mir3233,novel_mir2501,novel_mir3745,novel_mir4594,novel_mir2425,novel_mir4837,novel_mir2519	6mer	NA	-24.79	151	Ndufv1	GO:0005747,GO:0051287,GO:0008137,GO:0046872,GO:0051539,GO:0005515,GO:0010181,GO:0006810,GO:0009060,	K03942|1|5.9e-278|960.3|mmu:17995|NADH dehydrogenase (ubiquinone) flavoprotein 1 [EC:7.1.1.2 1.6.99.3]	gi|19526814|ref|NP_598427.1|	0	NADH dehydrogenase [ubiquinone] flavoprotein 1, mitochondrial precursor [Mus musculus]
XM_006510997.2	novel_mir4101,novel_mir862,novel_mir4169,novel_mir3610,novel_mir1186,novel_mir4116,novel_mir956,novel_mir2667,novel_mir1995,novel_mir457,novel_mir2326,novel_mir1575,novel_mir3546,novel_mir4717,novel_mir841,novel_mir5062,novel_mir531,mmu-miR-27a-5p,novel_mir3469,novel_mir782,novel_mir978,novel_mir3705,novel_mir1696,novel_mir632,mmu-miR-7b-5p,novel_mir1545,novel_mir566,novel_mir4925,novel_mir4228,m…	7mer-m8	NA	-23.63	154	Tcf12	GO:0090575,GO:0005737,GO:0000790,GO:0035497,GO:0001077,GO:0071837,GO:0000978,GO:0046982,GO:0042803,GO:0043425,GO:0046332,GO:0070888,GO:0045666,GO:0045944,	K15603|1|0.0e+00|1355.1|mmu:21406|transcription factor 4/12	gi|166295206|ref|NP_035674.2|	0	transcription factor 12 isoform 1 [Mus musculus]
XM_006510544.2	novel_mir3107,novel_mir1354,novel_mir269,novel_mir4050,novel_mir3494,novel_mir691,novel_mir1436,novel_mir7,novel_mir5177,novel_mir4107,novel_mir3739,novel_mir4780,novel_mir2748,novel_mir2469,novel_mir65,novel_mir84,novel_mir3530,novel_mir298,novel_mir4663,novel_mir2657,novel_mir169,novel_mir5294,novel_mir4509,novel_mir1294,novel_mir2189,novel_mir1072,novel_mir347,novel_mir3994,novel_mir1691,novel…	8mer-1a	NA	-28.29	161	Ubl5	-	K13113|1|2.2e-36|156.4|mdo:100012958|ubiquitin-like protein 5	gi|894216101|ref|NP_001297675.1|	3.33699e-79	ubiquitin-like protein 5 isoform 1 [Mus musculus]
XM_006500988.2	novel_mir3530,novel_mir5822,novel_mir211,novel_mir1425,novel_mir4287,novel_mir3766,novel_mir410,novel_mir1129,novel_mir1068,novel_mir1637,novel_mir1670,novel_mir4508,novel_mir5128,novel_mir2575,novel_mir4991,novel_mir4718,novel_mir3044,novel_mir2420,mmu-miR-6991-3p,novel_mir357,novel_mir1312,novel_mir4563,novel_mir3343,novel_mir5977,novel_mir3953,novel_mir1011,novel_mir2406,novel_mir3420,novel_mi…	7mer-m8	NA	-43.82	311	Efna3	GO:0005886,GO:0031225,GO:0046875,GO:0007411,GO:0045664,GO:0048013,	K05462|1|6.3e-124|449.1|csab:103223897|ephrin-A	gi|568921769|ref|XP_006501051.1|	8.2127e-152	PREDICTED: ephrin-A3 isoform X1 [Mus musculus]
NM_172861.3	novel_mir5512,novel_mir5796,novel_mir4177,novel_mir1158,novel_mir5046,novel_mir5856,novel_mir4763,novel_mir1010,novel_mir2426,novel_mir749,novel_mir5767,mmu-miR-28a-5p,novel_mir2012,novel_mir2118,novel_mir2712,novel_mir4936,novel_mir1814,novel_mir835,novel_mir4344,novel_mir3841,novel_mir199,novel_mir1509,novel_mir1655,mmu-miR-708-5p,novel_mir3277,mmu-miR-143-5p,novel_mir5066,novel_mir1941,novel_m…	7mer-m8	NA	-22.53	150	Slc7a14	GO:0005764,GO:0005887,GO:0015179,GO:0015297,GO:0003333,GO:0010923,GO:0006865,	K13871|1|0.0e+00|1531.2|mmu:241919|solute carrier family 7 (cationic amino acid transporter), member 14	gi|50511019|dbj|BAD32495.1|	0	mKIAA1613 protein [Mus musculus]
NM_024168.2	novel_mir127,novel_mir2337,novel_mir3744,novel_mir5889,novel_mir1712,novel_mir6103,mmu-miR-328-3p,novel_mir308,novel_mir4058,novel_mir1082,novel_mir4489,novel_mir1037,novel_mir95,novel_mir3936,novel_mir4570,novel_mir2563,novel_mir2865,novel_mir554,novel_mir4278,novel_mir4692,novel_mir5960,novel_mir1003,novel_mir5084,novel_mir1799,novel_mir1730,novel_mir884,novel_mir5251,novel_mir6081,novel_mir210…	8mer-1a	NA	-21.77	145	Tsen34	GO:0000214,GO:0003676,GO:0005515,GO:0016829,GO:0000213,GO:0000379,GO:0006397,	K15323|1|1.1e-179|633.6|mmu:66078|tRNA-splicing endonuclease subunit Sen34 [EC:4.6.1.16]	gi|148699249|gb|EDL31196.1|	0	mCG18479, isoform CRA_c, partial [Mus musculus]
NM_001014900.2	mmu-miR-486a-3p,novel_mir1489,novel_mir142,novel_mir6149,novel_mir764,novel_mir4149,novel_mir1640,novel_mir5914,novel_mir2124,novel_mir4950,novel_mir3231,novel_mir4005,novel_mir330,novel_mir1218,novel_mir2308,novel_mir2465,novel_mir308,novel_mir174,novel_mir171,novel_mir991,novel_mir487,novel_mir2869,novel_mir127,novel_mir583,novel_mir3167,novel_mir1468,novel_mir333,novel_mir4067,novel_mir187,nov…	7mer-1a	NA	-23.81	153	Zmynd12	GO:0005622,	-	gi|568929308|ref|XP_006503254.1|	0	PREDICTED: zinc finger MYND domain-containing protein 12 isoform X1 [Mus musculus]
NM_181321.3	novel_mir696,novel_mir1423,novel_mir1119,novel_mir1640,novel_mir2865,novel_mir1690,novel_mir1506,novel_mir4958,novel_mir3962,novel_mir4459,novel_mir2425,novel_mir2239,novel_mir1264,novel_mir428,novel_mir1573,novel_mir5431,novel_mir129,novel_mir3692,novel_mir685,novel_mir5850,novel_mir4077,novel_mir1348,novel_mir5609,novel_mir4697,novel_mir5504,mmu-miR-221-5p,novel_mir516,novel_mir188,novel_mir164…	6mer	NA	-23.2	146	Tmc6	GO:0031965,GO:0005794,GO:0016021,GO:0005783,GO:0070062,GO:0006811,	K21988|1|3.5e-164|582.0|mmu:217353|transmembrane channel-like protein	gi|31044457|ref|NP_851838.1|	0	transmembrane channel-like protein 6 isoform 2 [Mus musculus]
NM_133715.5	novel_mir4681,novel_mir137,novel_mir4058,novel_mir5596,novel_mir1374,novel_mir2711,novel_mir2611,novel_mir3655,novel_mir5382,novel_mir248,novel_mir3884,novel_mir2406,novel_mir837,novel_mir4209,novel_mir2337,novel_mir4807,novel_mir5522,novel_mir558,novel_mir1429,novel_mir1463,novel_mir1369,novel_mir1050,novel_mir1506,novel_mir585,novel_mir240,novel_mir3618,novel_mir598,novel_mir508,novel_mir4027,n…	7mer-m8	NA	-30.6	154	Arhgap27	GO:0005768,GO:0005654,GO:0016020,GO:0005096,GO:0017124,GO:0043547,GO:0007165,GO:0006898,	K20636|1|0.0e+00|1340.1|mmu:544817|Rho GTPase-activating protein 12/27	gi|568974859|ref|XP_006533817.1|	0	PREDICTED: rho GTPase-activating protein 27 isoform X1 [Mus musculus]
XM_011240831.2	novel_mir4346,novel_mir4718,novel_mir3044,novel_mir2420,novel_mir3304,novel_mir3630,novel_mir1553,novel_mir4508,novel_mir3166,novel_mir2519,novel_mir3866,mmu-miR-532-3p,novel_mir1047,novel_mir410,novel_mir3742,novel_mir1129,novel_mir4049,novel_mir3679,novel_mir4304,novel_mir3541,novel_mir2536,novel_mir4386,novel_mir244,novel_mir5822,mmu-miR-10b-5p,novel_mir2517,novel_mir4730,mmu-miR-103-2-5p,nove…	7mer-1a	NA	-53.45	316	Ncor2	-	K06065|1|0.0e+00|4889.3|rno:360801|nuclear receptor co-repressor 2	gi|359806942|ref|NP_001240833.1|	0	nuclear receptor corepressor 2 isoform 2 [Mus musculus]
NM_010794.3	novel_mir696,novel_mir1366,novel_mir616,novel_mir460,novel_mir788,mmu-miR-3072-3p,novel_mir1255,novel_mir926,novel_mir1004,novel_mir1540,novel_mir1449,novel_mir5724,novel_mir1822,novel_mir4369,novel_mir840,novel_mir4461,novel_mir1053,novel_mir4619,novel_mir2091,novel_mir242,novel_mir2104,novel_mir140,novel_mir1107,mmu-miR-328-5p,novel_mir747,novel_mir3897,novel_mir1920,novel_mir5071,novel_mir467,…	7mer-m8	NA	-44.71	306	Mgat1	GO:0016021,GO:0000139,GO:0070062,GO:0005783,GO:0004144,GO:0003846,GO:0046872,GO:0003827,GO:0006071,GO:0006049,GO:0006486,GO:0006651,GO:0001701,	K00726|1|1.5e-269|933.3|mmu:17308|alpha-1,3-mannosyl-glycoprotein beta-1,2-N-acetylglucosaminyltransferase [EC:2.4.1.101]	gi|158711696|ref|NP_034924.3|	0	alpha-1,3-mannosyl-glycoprotein 2-beta-N-acetylglucosaminyltransferase [Mus musculus]
NM_023878.3	novel_mir607,novel_mir569,novel_mir2759,novel_mir1870,novel_mir4008,novel_mir524,novel_mir1161,novel_mir1216,novel_mir2834,novel_mir5457,novel_mir5923,novel_mir5850,novel_mir308,novel_mir908,mmu-miR-124-3p,novel_mir3313,novel_mir744,mmu-miR-709,novel_mir2337,novel_mir2263,novel_mir4979,novel_mir5431,novel_mir5868,novel_mir3692,novel_mir807,novel_mir4605,novel_mir2343,novel_mir3099,mmu-miR-3077-3p…	6mer	NA	-21.87	156	Cldn10	GO:0016021,GO:0005923,GO:0005737,GO:0005886,GO:0005198,	K06087|1|4.9e-128|461.8|cge:100762571|claudin	gi|231567442|ref|NP_076367.2|	1.69323e-168	claudin-10 isoform a [Mus musculus]
NM_021356.2	novel_mir5354,novel_mir3882,novel_mir377,novel_mir468,novel_mir109,novel_mir4749,novel_mir5016,mmu-miR-149-5p,mmu-miR-503-5p,novel_mir332,novel_mir4311,novel_mir3714,novel_mir4223,novel_mir4032,novel_mir23,novel_mir830,novel_mir4750,novel_mir432,mmu-miR-17-3p,novel_mir1600,novel_mir1959,novel_mir1404,novel_mir514,novel_mir672,novel_mir1150,novel_mir4318,novel_mir265,novel_mir680,novel_mir269,nove…	6mer	NA	-21.1	154	Gab1	GO:0005737,GO:0004871,GO:0005515,GO:0008544,GO:0070102,GO:0007257,GO:0007507,GO:0030334,GO:0060711,GO:0007173,GO:0048008,GO:0006979,	K09593|1|0.0e+00|1441.8|mmu:14388|GRB2-associated-binding protein 1	gi|568956141|ref|XP_006530739.1|	0	PREDICTED: GRB2-associated-binding protein 1 isoform X3 [Mus musculus]
NM_029662.2	novel_mir2714,novel_mir2616,novel_mir3280,novel_mir4374,novel_mir2020,novel_mir2657,novel_mir3603,novel_mir4475,novel_mir521,novel_mir1062,novel_mir433,novel_mir3885,novel_mir4994,mmu-miR-370-3p,novel_mir5685,novel_mir386,novel_mir215,novel_mir2306,novel_mir5699,novel_mir2831,novel_mir635,mmu-miR-1199-5p,novel_mir179,novel_mir1373,novel_mir5512,novel_mir1010,novel_mir4540,novel_mir1607,novel_mir1…	6mer	NA	-23.1	147	Mfsd2a	GO:0005887,GO:0005783,GO:0005548,GO:0015293,GO:0045056,GO:0015908,GO:1990379,GO:0055085,GO:0060856,GO:0015914,	K08824|1|7.3e-21|106.7|bfo:BRAFLDRAFT_90694|cyclin-dependent kinase-like [EC:2.7.11.22]	gi|227430371|ref|NP_083938.2|	0	sodium-dependent lysophosphatidylcholine symporter 1 [Mus musculus]
NM_008830.2	mmu-miR-17-5p,mmu-miR-20b-5p	6mer	NA	-20.55	167	Abcb4	GO:0045121,GO:0000139,GO:0016021,GO:0070062,GO:0030136,GO:0046581,GO:0016324,GO:0005515,GO:0090554,GO:0008559,GO:0005524,GO:0002485,GO:0002489,GO:0055088,GO:1903413,GO:0006855,GO:0051384,GO:0061092,GO:1901557,GO:0032376,GO:0032782,GO:0002481,GO:0002591,GO:0042908,	K05659|1|0.0e+00|2486.8|mmu:18670|ATP-binding cassette, subfamily B (MDR/TAP), member 4 [EC:7.6.2.2]	gi|161086924|ref|NP_032856.2|	0	phosphatidylcholine translocator ABCB4 [Mus musculus]
NM_008640.2	mmu-miR-1964-5p,novel_mir1507,novel_mir722,novel_mir2648,novel_mir3589,novel_mir5107,novel_mir1297,novel_mir2586,novel_mir3091,novel_mir4723,novel_mir1007,novel_mir5291,novel_mir404,novel_mir1345,novel_mir4746,novel_mir3260,novel_mir3677,novel_mir540,novel_mir657,novel_mir1684,novel_mir2475,novel_mir1101,novel_mir4398,novel_mir3492,novel_mir4011,novel_mir304,novel_mir4291,novel_mir301,novel_mir36…	8mer-1a	NA	-28.51	162	Laptm4a	-	K12387|1|2.6e-180|636.3|mmu:17775|lysosomal-associated transmembrane protein	gi|109689716|ref|NP_032666.2|	0	lysosomal-associated transmembrane protein 4A [Mus musculus]
NM_008067.4	novel_mir4641,mmu-miR-195a-5p,novel_mir382,novel_mir4959,novel_mir6093,novel_mir2979,novel_mir956,novel_mir533,novel_mir5286,novel_mir1733,novel_mir5861,novel_mir4697,novel_mir857,novel_mir1531,novel_mir3802,novel_mir5414,novel_mir3744,novel_mir5257,novel_mir5148,novel_mir3068,novel_mir1334,novel_mir140,novel_mir4228,novel_mir183,novel_mir192,novel_mir3897,novel_mir1747,mmu-miR-328-3p,novel_mir22…	6mer	NA	-24.16	156	Gabra3	GO:0030054,GO:0034707,GO:0045211,GO:1902711,GO:0005230,GO:0004890,GO:0005254,GO:0007214,GO:0007268,GO:0006821,	K05175|1|1.5e-287|993.4|mmu:14396|gamma-aminobutyric acid receptor subunit alpha	gi|149027091|gb|EDL82833.1|	0	gamma-aminobutyric acid (GABA-A) receptor, subunit alpha 3 [Rattus norvegicus]
NM_053110.4	novel_mir370,novel_mir4179,novel_mir3859,novel_mir1664,novel_mir4729,novel_mir4236,novel_mir275,novel_mir221,novel_mir4361,novel_mir5003,novel_mir5291,novel_mir3511,novel_mir5298,novel_mir5076,novel_mir3079,novel_mir2259,novel_mir773,novel_mir4018,novel_mir3790,novel_mir3657,novel_mir1063,novel_mir2049,novel_mir1472,novel_mir1910,novel_mir1160,novel_mir893,novel_mir4292,novel_mir4473,novel_mir524…	6mer	NA	-22.67	155	Gpnmb	GO:0005887,GO:0008201,GO:0005178,GO:0032720,GO:0007155,	K20732|1|2.5e-303|1045.8|rno:113955|transmembrane glycoprotein NMB	gi|171846253|ref|NP_444340.3|	0	transmembrane glycoprotein NMB precursor [Mus musculus]
NM_001101038.1	novel_mir2470,novel_mir5154,novel_mir2990,novel_mir4499,mmu-miR-378d,novel_mir2117,novel_mir1204,novel_mir2175,novel_mir2199,novel_mir5193,novel_mir1733,novel_mir2140,novel_mir1769,novel_mir1066,novel_mir1424,novel_mir548,novel_mir357,novel_mir4155,novel_mir2942,novel_mir2286,novel_mir3412,novel_mir136,novel_mir1816,novel_mir1253,novel_mir150,mmu-miR-28a-3p,novel_mir1787,novel_mir1053,novel_mir42…	7mer-m8	NA	-20.17	155	Siglec15	GO:0043234,GO:0005886,GO:0005515,GO:2001204,GO:0071402,GO:0032956,GO:0045124,	K16352|1|5.4e-200|700.7|mmu:620235|sialic acid binding Ig-like lectin 15	gi|155372047|ref|NP_001094508.1|	0	sialic acid-binding Ig-like lectin 15 precursor [Mus musculus]
NM_011710.3	novel_mir685,novel_mir615,novel_mir596,novel_mir344,novel_mir4945,novel_mir2404,novel_mir1770,novel_mir1058,novel_mir2477,mmu-miR-125b-5p,novel_mir1209,novel_mir3412,novel_mir1238,mmu-miR-6954-3p,novel_mir1621,novel_mir347,novel_mir3662,novel_mir1527,novel_mir1121,novel_mir509,novel_mir4990,novel_mir2829,novel_mir5760,novel_mir378,novel_mir1579,novel_mir3512,novel_mir224,novel_mir3528,novel_mir21…	7mer-m8	NA	-20.84	147	Wars	GO:0070062,GO:0005737,GO:0005634,GO:0004830,GO:0005524,GO:0006436,GO:0045765,	K01867|1|4.8e-284|980.7|mmu:22375|tryptophanyl-tRNA synthetase [EC:6.1.1.2]	gi|256818746|ref|NP_001157960.1|	0	tryptophan--tRNA ligase, cytoplasmic isoform 2 [Mus musculus]
NM_023064.3	novel_mir2633,novel_mir214,novel_mir4027,novel_mir3239,novel_mir343,novel_mir588,novel_mir755,novel_mir2203,novel_mir4212,novel_mir1463,novel_mir257,novel_mir2232,novel_mir1349,mmu-miR-6948-3p,novel_mir5776,novel_mir1255,novel_mir385,novel_mir2032,novel_mir1956,novel_mir4013,novel_mir183,novel_mir3680,novel_mir344,novel_mir4661,novel_mir5982,novel_mir1208,novel_mir282,mmu-miR-3473b,novel_mir4194,…	8mer-1a	NA	-26.41	154	Tbata	GO:0005737,GO:0005634,GO:0005515,GO:0048515,GO:0007275,	-	gi|63079695|ref|NP_075551.3|	3.64729e-169	protein TBATA isoform 3 [Mus musculus]
NM_019975.3	novel_mir5128,novel_mir305,novel_mir3137,novel_mir264,novel_mir4105,novel_mir1995,novel_mir1637,novel_mir1281,novel_mir126,novel_mir152,novel_mir632,novel_mir2407	7mer-1a	NA	-21.35	148	Hacl1	GO:0005777,GO:0030976,GO:0016830,GO:0042802,GO:0005102,GO:0000287,GO:0051259,GO:0001561,	K12261|1|0.0e+00|1175.6|mmu:56794|2-hydroxyacyl-CoA lyase 1 [EC:4.1.-.-]	gi|31560355|ref|NP_064359.2|	0	2-hydroxyacyl-CoA lyase 1 [Mus musculus]
NM_009426.3	novel_mir2379,novel_mir3261,novel_mir435,novel_mir2352,mmu-miR-486a-3p,novel_mir5246,novel_mir2646,novel_mir3878,novel_mir554,novel_mir6108,novel_mir2124,novel_mir894,novel_mir1368,novel_mir95,novel_mir3400,novel_mir1940,novel_mir227,mmu-miR-7058-5p,novel_mir3405,novel_mir203,novel_mir4690,novel_mir1077,novel_mir1403,novel_mir2869,novel_mir608,novel_mir983,novel_mir751,novel_mir326,novel_mir351,n…	7mer-m8	NA	-30.64	166	Trh	GO:0030141,GO:0005576,GO:0005886,GO:0005634,GO:0008437,GO:0005184,GO:0051412,GO:0009749,GO:0001692,GO:0045471,GO:0009755,GO:0042755,GO:0007628,GO:0001666,GO:0014050,GO:0009409,GO:2000252,GO:0014054,GO:0032024,	K05253|1|2.0e-152|543.1|mmu:22044|thyrotropin-releasing hormone	gi|134031937|ref|NP_033452.2|	0	thyrotropin releasing hormone preproprotein [Mus musculus]
XM_006530255.3	novel_mir1046,novel_mir470,novel_mir1981,novel_mir2082,mmu-miR-149-5p,mmu-miR-204-3p,novel_mir1648,novel_mir722,novel_mir3790,novel_mir3657,novel_mir377,novel_mir4203,novel_mir1730,novel_mir941,novel_mir4049,novel_mir5748,novel_mir313,novel_mir432,novel_mir5646,novel_mir419,novel_mir5594,novel_mir4413,novel_mir2442,novel_mir841,novel_mir86,novel_mir1646,mmu-miR-320-3p,novel_mir632,novel_mir2449,n…	7mer-m8	NA	-22.62	152	Ccdc62	GO:0005654,GO:0005737,GO:0005886,GO:0030331,GO:0030374,GO:0045944,GO:0071392,	K20040|1|4.5e-279|964.9|rss:109448542|huntingtin-interacting protein 1-related protein!K20478|2|1.4e-14|86.3|dre:557772|golgin subfamily B member 1	gi|568937081|ref|XP_006530334.1|	0	PREDICTED: coiled-coil domain-containing protein 62 isoform X15 [Mus musculus]
NM_001163270.1	novel_mir4312,novel_mir5618,novel_mir4430,novel_mir5888,novel_mir3954,novel_mir1733,novel_mir1762,novel_mir1514,novel_mir209,novel_mir632,novel_mir3862,novel_mir3802,novel_mir782,novel_mir5992,novel_mir604,mmu-miR-7091-3p,novel_mir3599,novel_mir2594,novel_mir1995,novel_mir1765,novel_mir973,novel_mir103,novel_mir4116,novel_mir247,novel_mir3566,novel_mir2826,novel_mir1094,novel_mir4292,novel_mir432…	7mer-1a	NA	-44.96	324	Baiap3	-	K15621|1|0.0e+00|2245.3|cge:100751355|BAI1-associated protein 3	gi|253795532|ref|NP_001156742.1|	0	BAI1-associated protein 3 [Mus musculus]
XM_006504650.3	novel_mir5234,novel_mir2781,novel_mir795,novel_mir178,novel_mir3872,novel_mir4318,novel_mir3413,novel_mir3296,mmu-let-7c-5p,novel_mir5008,mmu-let-7b-5p,novel_mir4045,novel_mir6013,novel_mir3742,novel_mir971,novel_mir5741,novel_mir4032,novel_mir3228,novel_mir5354,novel_mir755,novel_mir1542,novel_mir4672,novel_mir4588,novel_mir4007,novel_mir1242,novel_mir5795,novel_mir1463,novel_mir879,mmu-let-7g-5…	7mer-m8	NA	-49.86	306	Grid2ip	GO:0043197,GO:0045211,GO:0030054,GO:0005515,GO:0060292,GO:0030036,GO:0007216,	K05741|1|7.5e-54|216.9|pmaj:107203813|diaphanous 2!K04512|2|4.9e-53|214.2|sgh:107553728|dishevelled associated activator of morphogenesis	gi|49523342|gb|AAH75624.1|	0	Grid2ip protein [Mus musculus]
NM_001001495.2	novel_mir4796,novel_mir2089,novel_mir745,novel_mir1175,novel_mir482,novel_mir1488,novel_mir1495,novel_mir1225,novel_mir662,novel_mir280,novel_mir4961,novel_mir2738,novel_mir2132,novel_mir5407,novel_mir1662,novel_mir1281,novel_mir3005,novel_mir2269,novel_mir480,novel_mir1403,novel_mir2343,novel_mir4777,novel_mir5239,novel_mir267,novel_mir3494,novel_mir4194,novel_mir4050,novel_mir3076,novel_mir1544…	7mer-m8	NA	-22.29	156	Tnip3	GO:0031593,GO:0002756,GO:0043124,GO:0034142,GO:0071222,	-	gi|110665744|ref|NP_001001495.2|	1.55309e-151	TNFAIP3-interacting protein 3 [Mus musculus]
NM_023742.2	mmu-miR-124-3p,novel_mir5023,novel_mir645,novel_mir1863,novel_mir5457,novel_mir203,novel_mir480,novel_mir1662,novel_mir425,novel_mir1841,novel_mir482,novel_mir5860,novel_mir816,novel_mir764,novel_mir1165,novel_mir2167,novel_mir1009,novel_mir495,novel_mir2324,novel_mir1661,novel_mir5615,novel_mir5464,novel_mir1065,novel_mir356,novel_mir4092,novel_mir267,mmu-miR-3473b,mmu-miR-370-3p,novel_mir4074,n…	6mer	NA	-24.38	155	Dtx2	GO:0005737,GO:0031965,GO:0005654,GO:0070740,GO:0043773,GO:0005515,GO:0018169,GO:0070737,GO:0008766,GO:0008270,GO:0070736,GO:0070738,GO:0043774,GO:0007219,	K06058|1|0.0e+00|1278.8|mmu:74198|deltex [EC:2.3.2.27]	gi|148687387|gb|EDL19334.1|	0	deltex 2 homolog (Drosophila), isoform CRA_c, partial [Mus musculus]
NM_016974.3	novel_mir480,novel_mir5482,novel_mir2573,novel_mir5082,novel_mir2634,novel_mir2918,novel_mir66,novel_mir2738,novel_mir657,novel_mir453,novel_mir5456,novel_mir1691,novel_mir650,novel_mir764,novel_mir1265,novel_mir750,novel_mir4796,novel_mir241,novel_mir1185,novel_mir677,novel_mir1574,novel_mir5703,novel_mir1393,novel_mir3718,novel_mir4622,novel_mir818,novel_mir2657,novel_mir188,novel_mir98,novel_m…	7mer-m8	NA	-30.81	163	Dbp	GO:0005634,GO:0001077,GO:0000977,GO:0045944,GO:0001889,GO:0007623,	K09056|1|7.7e-188|661.0|mmu:13170|albumin D box-binding protein	gi|586597916|ref|NP_001276912.1|	3.12903e-135	D site-binding protein isoform 3 [Rattus norvegicus]
NM_130457.2	novel_mir2127,novel_mir460,novel_mir760,novel_mir259,novel_mir182,novel_mir5429,novel_mir342,novel_mir2533,novel_mir2137,novel_mir3235,novel_mir4719,novel_mir446,novel_mir4369,novel_mir1835,novel_mir855,novel_mir1107,novel_mir3897,novel_mir3269,novel_mir728,novel_mir354,novel_mir632,novel_mir2353,novel_mir3903,novel_mir994,novel_mir889,novel_mir691,novel_mir1263,novel_mir247,novel_mir353,mmu-miR-…	6mer	NA	-20.51	140	Cntnap4	GO:0030425,GO:0042734,GO:0030054,GO:0016021,GO:0005515,GO:0032228,GO:0007155,GO:0032225,GO:2000821,	K07380|1|0.0e+00|1265.8|srx:107727227|contactin associated protein-like 2	gi|568956248|ref|XP_006530792.1|	0	PREDICTED: contactin-associated protein-like 4 isoform X1 [Mus musculus]
NM_023479.2	novel_mir1506,novel_mir1429,novel_mir1369,novel_mir415,novel_mir755,novel_mir1423,novel_mir429,novel_mir508,novel_mir1242,novel_mir3255,novel_mir4549,novel_mir5596,novel_mir4058,novel_mir2184,novel_mir4209,novel_mir3544,novel_mir1245,novel_mir5335,mmu-miR-351-5p,novel_mir833,novel_mir311,novel_mir4508,novel_mir823,novel_mir118,novel_mir4045,novel_mir2781,novel_mir4563,novel_mir2443,novel_mir770,n…	6mer	NA	-20.51	147	Elac2	GO:0042645,GO:0005654,GO:0004549,GO:0004519,GO:0046872,GO:0072684,	K00784|1|0.0e+00|1687.5|mmu:68626|ribonuclease Z [EC:3.1.26.11]	gi|568975502|ref|XP_006534128.1|	0	PREDICTED: zinc phosphodiesterase ELAC protein 2 isoform X1 [Mus musculus]
NM_183175.4	novel_mir199,novel_mir2535,novel_mir835,novel_mir448,novel_mir5504,novel_mir2140,novel_mir592,novel_mir1013,novel_mir4553,novel_mir1204,novel_mir546,mmu-miR-434-3p,novel_mir1572,novel_mir4670,novel_mir327,novel_mir1007,novel_mir2061,novel_mir2511,novel_mir4953,novel_mir266,novel_mir389,novel_mir4068,novel_mir4854,novel_mir4328,novel_mir1225,novel_mir1402,novel_mir2666,novel_mir180,novel_mir1002,n…	6mer	NA	-22.89	149	C1qtnf9	GO:0070062,GO:0005581,GO:0005179,	K06237|1|1.5e-54|218.4|cmk:103182603|collagen, type IV, alpha	gi|63999399|ref|NP_898998.2|	0	complement C1q and tumor necrosis factor-related protein 9 precursor [Mus musculus]
NM_031998.3	novel_mir1374,novel_mir4144,novel_mir6077,mmu-miR-410-5p,novel_mir1130,novel_mir2840,novel_mir2184,novel_mir2047,novel_mir1253,novel_mir3544,novel_mir558,novel_mir384,novel_mir585,novel_mir4060,novel_mir2467,novel_mir4056,novel_mir5039,novel_mir2450,novel_mir4797,novel_mir2706,novel_mir3747,novel_mir1537,novel_mir849,novel_mir1006,novel_mir1229,novel_mir5948,novel_mir1425,novel_mir5259,novel_mir4…	6mer	NA	-104.15	640	Cep41	GO:0009986,GO:0036064,GO:0005911,GO:0005814,GO:0005886,GO:0015031,	K16455|1|8.1e-216|755.0|mmu:83922|centrosomal protein CEP41	gi|14030773|ref|NP_114387.1|	0	centrosomal protein of 41 kDa [Mus musculus]
NM_011012.5	novel_mir837,novel_mir5833,novel_mir2406,novel_mir4014,novel_mir601,novel_mir618,novel_mir4209,novel_mir5002,novel_mir3953,novel_mir3069,novel_mir3655,novel_mir4144,novel_mir1096,novel_mir2425,novel_mir558,novel_mir2481,novel_mir585,novel_mir4856,novel_mir1300,mmu-miR-7051-5p,novel_mir5401,novel_mir1799,novel_mir1637,novel_mir4989,mmu-miR-212-3p,novel_mir5610,novel_mir4386,novel_mir3752,novel_mir…	7mer-m8	NA	-22.74	152	Oprl1	GO:0043005,GO:0005887,GO:0031410,GO:0008022,GO:0001626,GO:0042923,GO:0001934,GO:1901386,GO:0007204,GO:0060454,GO:0007193,GO:0007218,GO:0035810,GO:0042755,GO:1904059,GO:1904058,GO:0030818,GO:0045776,GO:0007268,	K04216|1|4.4e-210|735.7|mmu:18389|nociceptin receptor	gi|974380264|ref|NP_001305848.1|	0	nociceptin receptor isoform 1x [Mus musculus]
NM_144892.1	novel_mir4508,novel_mir4045,novel_mir3753,novel_mir2519,novel_mir2386,novel_mir867,novel_mir2129,novel_mir464,novel_mir624,novel_mir833,novel_mir1503,novel_mir5498,novel_mir2443,novel_mir357,novel_mir1312,novel_mir4890,novel_mir2273,novel_mir211,novel_mir2444,novel_mir4730,novel_mir499,novel_mir1764,novel_mir3766,novel_mir3742,novel_mir1129,novel_mir4049,novel_mir426,novel_mir4989,novel_mir4304,n…	8mer-1a	NA	-21.62	148	Ncoa5	GO:0005615,GO:0015629,GO:0005634,GO:0003682,GO:0042593,GO:0046627,GO:0006355,	K22909|1|1.2e-21|109.8|mmu:67302|zinc finger CCCH domain-containing protein 13	gi|755499475|ref|XP_006499432.2|	0	PREDICTED: nuclear receptor coactivator 5 isoform X1 [Mus musculus]
NM_026922.1	novel_mir4155,novel_mir659,novel_mir4864,novel_mir6106,novel_mir4804,novel_mir4741,novel_mir1040,novel_mir592,novel_mir1649,novel_mir431,novel_mir1932,novel_mir1585,novel_mir2100,novel_mir2648,novel_mir634,novel_mir729,novel_mir2423,novel_mir201,novel_mir541,novel_mir683,novel_mir5166,mmu-miR-8114,novel_mir2767,novel_mir1365,novel_mir2865,novel_mir5270,novel_mir465,novel_mir3100,mmu-miR-339-5p,mm…	6mer	NA	-26.29	156	Atp2c2	GO:0005887,GO:0000139,GO:0031410,GO:0048471,GO:0009898,GO:0005515,GO:0015410,GO:0046872,GO:0005388,GO:0005524,GO:0061180,GO:0090280,GO:0006874,GO:0071421,GO:0070588,	K01537|1|0.0e+00|1688.3|ngi:103729833|Ca2+-transporting ATPase [EC:3.6.3.8]	gi|189339256|ref|NP_081198.1|	0	calcium-transporting ATPase type 2C member 2 [Mus musculus]
NM_199055.2	novel_mir1088,novel_mir2573,novel_mir4982,novel_mir4211,novel_mir303,mmu-miR-199a-5p,novel_mir4487,novel_mir4033,novel_mir1244,novel_mir1563,novel_mir5002,novel_mir2149,novel_mir1863,novel_mir633,novel_mir2599,novel_mir4293,novel_mir3994,novel_mir1691,novel_mir3936,mmu-miR-298-5p,novel_mir4450,novel_mir5388,novel_mir2189,novel_mir3243,novel_mir3938,novel_mir3070,novel_mir2015,novel_mir4525,novel_…	8mer-1a	NA	-24.29	148	Chst9	GO:0005794,GO:0016021,GO:0034930,GO:0050694,GO:0018722,GO:0016232,GO:0018726,GO:0001517,GO:0051922,GO:0001537,GO:0018724,GO:0017095,GO:0018725,GO:0050698,GO:0018721,GO:0018723,GO:0004394,GO:0018727,GO:0080131,GO:0006790,GO:0016051,	K09673|1|3.0e-246|854.7|mmu:71367|carbohydrate 4-sulfotransferase 9 [EC:2.8.2.-]	gi|148669658|gb|EDL01605.1|	0	carbohydrate (N-acetylgalactosamine 4-0) sulfotransferase 9, isoform CRA_b, partial [Mus musculus]
NM_019822.3	novel_mir470,novel_mir2738,novel_mir494,novel_mir784,novel_mir143,novel_mir798,novel_mir3546,novel_mir1404,novel_mir5257,novel_mir2212,novel_mir2106,novel_mir1573,novel_mir1596,novel_mir6149,novel_mir3745,novel_mir2583,novel_mir3103,novel_mir1463,novel_mir2442,novel_mir918,novel_mir1889,novel_mir1075,novel_mir1516,novel_mir4589,novel_mir2742,novel_mir3567,novel_mir4966,novel_mir1805	6mer	NA	-22.88	152	Adrm1	GO:0005654,GO:0005737,GO:0000502,GO:0005886,GO:0070628,GO:0061133,GO:0002020,GO:0033081,GO:0072520,GO:0007286,GO:0048538,GO:0060009,GO:0042699,GO:0060612,GO:0048477,GO:0006368,GO:0043248,GO:0060399,	K06691|1|8.5e-228|793.5|ccan:109689085|26S proteasome regulatory subunit N13!K20174|5|1.4e-222|776.2|eai:106836339|oxysterol-binding protein-related protein 1/2	gi|568920357|ref|XP_006500743.1|	0	PREDICTED: proteasomal ubiquitin receptor ADRM1 isoform X1 [Mus musculus]
NM_007599.4	novel_mir2140,mmu-miR-6953-3p,novel_mir5685,novel_mir1013,novel_mir6060,novel_mir653,novel_mir1856,novel_mir267,novel_mir5046,novel_mir5856,novel_mir1065,novel_mir5799,novel_mir1440,novel_mir1749,novel_mir1336,novel_mir495,novel_mir5105,novel_mir5521,novel_mir1557,novel_mir1402,novel_mir3384,novel_mir588,novel_mir4005,novel_mir1108,novel_mir318,novel_mir482,novel_mir6149,novel_mir5579,novel_mir76…	7mer-m8	NA	-23.42	155	Capg	GO:0072686,GO:0005654,GO:0005814,GO:0090543,GO:0005913,GO:0042470,GO:0005730,GO:0070062,GO:0098641,GO:0003779,GO:0019904,GO:0032403,GO:0022617,GO:0030031,GO:0071803,GO:0051016,	K10368|1|3.7e-203|711.4|mmu:12332|capping protein (actin filament), gelsolin-like	gi|110227377|ref|NP_001035999.1|	0	macrophage-capping protein [Mus musculus]
NM_027777.2	novel_mir683,novel_mir3293,novel_mir1694,novel_mir2355,novel_mir3739,novel_mir2990,novel_mir2293,mmu-miR-1934-5p,novel_mir687,novel_mir955,novel_mir4509,novel_mir392,novel_mir4453,novel_mir656,novel_mir5561,novel_mir2823,novel_mir345,novel_mir1916,novel_mir875,novel_mir1473,novel_mir4103,mmu-miR-193a-5p,novel_mir3665,novel_mir128,novel_mir1461,novel_mir5229,novel_mir596,mmu-miR-5114,novel_mir5683…	7mer-m8	NA	-24.63	169	Pex1	GO:0005654,GO:0005829,GO:0070062,GO:0005778,GO:0008022,GO:0046872,GO:0003677,GO:0008289,GO:0042623,GO:0032403,GO:0005524,GO:0003700,GO:0007275,GO:0016558,GO:0006355,GO:0060152,	K13338|1|0.0e+00|2176.4|rno:500006|peroxin-1	gi|658309686|ref|NP_001280735.1|	0	peroxisome biogenesis factor 1 isoform 1 [Mus musculus]
NM_013607.2	novel_mir385,novel_mir315,novel_mir5770,novel_mir4854,novel_mir801,novel_mir5725,novel_mir288,novel_mir2834,mmu-miR-450a-2-3p,novel_mir3562,novel_mir509,novel_mir4661,novel_mir1101,novel_mir2265,mmu-miR-193a-5p,novel_mir2502,novel_mir1122,novel_mir5695,novel_mir3579,novel_mir5337,novel_mir282,novel_mir1322,novel_mir392,novel_mir1579,novel_mir5841,novel_mir5303,novel_mir4689,novel_mir4743,novel_mi…	6mer	NA	-44.88	315	Myh11	-	K10352|1|0.0e+00|3469.1|aam:106482581|myosin heavy chain	gi|568994729|ref|XP_006521906.1|	0	PREDICTED: myosin-11 isoform X1 [Mus musculus]
NM_009971.1	novel_mir183,novel_mir1443,novel_mir164,novel_mir5784,novel_mir3667,novel_mir184,novel_mir2112,novel_mir4459,novel_mir5778,novel_mir4566,novel_mir5284,novel_mir2127,novel_mir3769,novel_mir1817,novel_mir696,novel_mir3664,novel_mir2765,novel_mir2064,novel_mir4046,novel_mir3205,novel_mir169,novel_mir559,novel_mir6088,novel_mir2099,novel_mir5477,mmu-miR-195a-5p,novel_mir5076,novel_mir3599,novel_mir19…	7mer-m8	NA	-35.02	164	Csf3	GO:0005615,GO:0008083,GO:0005125,GO:0005130,GO:0019899,GO:0033138,GO:0030838,GO:0030851,GO:0008284,GO:0032092,GO:0006955,GO:0071345,GO:0042993,GO:2000251,GO:0014068,GO:1901215,GO:0045944,GO:0050731,GO:0051897,GO:0045639,	K05423|1|4.8e-111|405.6|mmu:12985|granulocyte colony-stimulating factor	gi|6753536|ref|NP_034101.1|	1.43895e-144	granulocyte colony-stimulating factor precursor [Mus musculus]
XM_011248052.2	mmu-miR-1934-5p,novel_mir687,novel_mir389,novel_mir5149,novel_mir1775,novel_mir4087,novel_mir3935,novel_mir2644,novel_mir3387,novel_mir4804,novel_mir2978,novel_mir759,novel_mir2413,novel_mir345,novel_mir502,novel_mir1285,novel_mir873,novel_mir1649,novel_mir431,novel_mir2370,novel_mir1166,novel_mir344,novel_mir4634,novel_mir1304,novel_mir303,novel_mir297,novel_mir2869,novel_mir5889,novel_mir5350,n…	7mer-m8	NA	-20.74	143	Ikbke	GO:0031966,GO:0016605,GO:0008384,GO:0004704,GO:0036435,GO:0031625,GO:0005524,GO:0098586,GO:0006468,GO:0034340,GO:0051260,GO:0008630,GO:0035456,	K07211|1|0.0e+00|1439.1|mmu:56489|inhibitor of nuclear factor kappa-B kinase subunit epsilon [EC:2.7.11.10]	gi|148707764|gb|EDL39711.1|	0	inhibitor of kappaB kinase epsilon, isoform CRA_b, partial [Mus musculus]
NM_009601.4	novel_mir491,novel_mir903,novel_mir5920,novel_mir569,novel_mir2839,novel_mir997,novel_mir496,novel_mir5394,novel_mir3662,novel_mir4753,novel_mir1101,novel_mir4558,novel_mir3919,novel_mir129,novel_mir5447,novel_mir4614,novel_mir5754,novel_mir3045,novel_mir3977,novel_mir4086,novel_mir5764,novel_mir515,novel_mir647,novel_mir1512,novel_mir2426,novel_mir781,novel_mir1668,novel_mir5043,novel_mir4176,no…	8mer-1a	NA	-25.99	161	Chrnb1	GO:0030054,GO:0005892,GO:0045211,GO:0015464,GO:0042166,GO:0005515,GO:0098655,GO:0007274,GO:0003009,GO:0035095,GO:0007271,GO:0048747,GO:0001941,GO:0007165,GO:0042391,GO:0050877,	K04812|1|5.4e-295|1017.3|mmu:11443|nicotinic acetylcholine receptor beta-1	gi|160358782|ref|NP_033731.3|	0	acetylcholine receptor subunit beta precursor [Mus musculus]
NM_153168.2	novel_mir5645,novel_mir5454,novel_mir2535,novel_mir3519,mmu-miR-122-5p,novel_mir3311,novel_mir664,novel_mir4706,novel_mir1259,novel_mir1936,novel_mir4183,novel_mir577,novel_mir2506,novel_mir3868,novel_mir2858,novel_mir1042,novel_mir1775,novel_mir2990,novel_mir2212,novel_mir4501,novel_mir5943,novel_mir455,novel_mir138,novel_mir687,novel_mir4753,novel_mir2554,mmu-miR-93-3p,novel_mir25,novel_mir4456…	6mer	NA	-26.75	147	Lars2	-	K01869|1|0.0e+00|1697.2|cge:100758963|leucyl-tRNA synthetase [EC:6.1.1.4]	-	-	-
NM_008718.2	novel_mir1435,novel_mir2426,novel_mir1814,novel_mir835,mmu-miR-484,novel_mir4192,novel_mir2831,novel_mir1158,novel_mir398,novel_mir5239,novel_mir5764,novel_mir2008,novel_mir4352,novel_mir1873,novel_mir1595,novel_mir1572,novel_mir2657,novel_mir5301,novel_mir3952,novel_mir496,novel_mir3515,novel_mir2839,novel_mir1368,novel_mir2461,novel_mir1292,novel_mir588,novel_mir3408,mmu-miR-7682-3p,novel_mir13…	6mer	NA	-20.54	144	Npas1	GO:0005634,GO:0000981,GO:0003677,GO:0046983,GO:0001964,GO:0000122,GO:0042711,GO:0032502,	K09098|1|0.0e+00|1204.5|mmu:18142|neuronal PAS domain-containing protein 1/3	gi|6679100|ref|NP_032744.1|	0	neuronal PAS domain-containing protein 1 [Mus musculus]
NM_146258.2	novel_mir1371,novel_mir2767,novel_mir5149,novel_mir3217,novel_mir2364,novel_mir1775,novel_mir2338,novel_mir1694,novel_mir3935,novel_mir1692,novel_mir2331,novel_mir3533,novel_mir1768,novel_mir703,novel_mir6016,novel_mir3168,novel_mir224,novel_mir5277,novel_mir592,novel_mir4770,novel_mir4926,novel_mir6001,novel_mir2978,novel_mir2062,novel_mir5503,novel_mir2382,novel_mir5816,novel_mir4513,mmu-miR-18…	8mer-1a	NA	-20.52	147	Stard13	-	K20632|1|0.0e+00|2092.8|cge:100757703|deleted in liver cancer protein	gi|568939279|ref|XP_006504988.1|	0	PREDICTED: stAR-related lipid transfer protein 13 isoform X5 [Mus musculus]
NM_133997.2	novel_mir4004,novel_mir1230,novel_mir4529,novel_mir5457,novel_mir984,novel_mir5173,mmu-miR-8114,novel_mir1339,novel_mir6008,novel_mir428,novel_mir2551,novel_mir5076,novel_mir4096,novel_mir956,novel_mir3068	7mer-m8	NA	-20.21	146	Apof	GO:0034362,GO:0034364,GO:0006641,GO:0033344,GO:0008203,	K03155|1|2.1e-19|101.7|cmy:102932604|timeless!K00731|2|3.3e-17|94.4|tng:GSTEN00027250G001|glycoprotein-N-acetylgalactosamine 3-beta-galactosyltransferase [EC:2.4.1.122]!K02942|3|6.9e-07|60.1|rro:104677634|large subunit ribosomal protein LP1	gi|19527216|ref|NP_598758.1|	0	apolipoprotein F precursor [Mus musculus]
XM_006505860.2	novel_mir4423,novel_mir1270,novel_mir248,novel_mir1245,novel_mir1463,novel_mir5806,novel_mir585,novel_mir429,novel_mir4220,novel_mir1423,novel_mir4797,novel_mir4202,novel_mir5827,novel_mir4145,novel_mir3686,novel_mir1425,novel_mir2173,mmu-miR-878-3p,novel_mir1764,novel_mir4091,novel_mir49,novel_mir426,novel_mir3378,novel_mir4275,novel_mir770,novel_mir2443,novel_mir1166,novel_mir596,novel_mir972,n…	8mer-1a	NA	-22.08	152	Rho	GO:0005911,GO:0005887,GO:0005794,GO:0030867,GO:0042622,GO:0060342,GO:0030507,GO:0008020,GO:0046872,GO:0016918,GO:0009585,GO:0045494,GO:0016056,GO:0018298,GO:0060041,GO:0006468,GO:0007601,GO:0016038,	K04250|1|1.9e-193|681.0|mmu:212541|rhodopsin	gi|21717805|ref|NP_663358.1|	0	rhodopsin [Mus musculus]
NM_010634.3	novel_mir3163,novel_mir5182,novel_mir5931,novel_mir1007,novel_mir3179,novel_mir5650,novel_mir5811,novel_mir6120,novel_mir971,novel_mir722,novel_mir5805,novel_mir3797	8mer-1a	NA	-21.28	140	Fabp5	GO:0005737,GO:0070062,GO:0005504,GO:0005215,GO:0006629,GO:0006656,GO:0006006,GO:0015758,	K08754|1|3.6e-73|279.3|mmu:16592|fatty acid-binding protein 5, epidermal	gi|6754450|ref|NP_034764.1|	1.69669e-96	fatty acid-binding protein, epidermal isoform 1 [Mus musculus]
NM_011657.2	novel_mir267,novel_mir3248,novel_mir663,novel_mir5807,novel_mir373,novel_mir233,mmu-miR-486b-3p,mmu-miR-3473b,novel_mir1394,novel_mir802,novel_mir5541,novel_mir1513,novel_mir3277,novel_mir1814,novel_mir3746,novel_mir1128,novel_mir495,novel_mir2329,novel_mir4994,novel_mir6109,novel_mir1393,novel_mir2447,novel_mir59,novel_mir1440,novel_mir3718,novel_mir730,novel_mir5776,novel_mir3883,novel_mir764,n…	7mer-m8	NA	-45.08	297	Tulp3	GO:0097546,GO:0030991,GO:0005576,GO:0005737,GO:0005730,GO:0005930,GO:0005886,GO:0035091,GO:0032403,GO:0019899,GO:0042733,GO:0060348,GO:0021914,GO:0060434,GO:0097500,GO:0048702,GO:0021953,GO:0007420,GO:1901621,GO:1903546,GO:0008277,GO:0001843,GO:0031076,GO:0061548,GO:0009952,	K19600|1|7.4e-121|439.5|nni:104013231|tubby-related protein 1	gi|6755905|ref|NP_035787.1|	0	tubby-related protein 3 [Mus musculus]
XM_006534842.3	novel_mir103,novel_mir381,novel_mir1765,novel_mir2822,mmu-miR-140-5p,novel_mir1333,novel_mir2826,novel_mir1377,novel_mir3774,novel_mir4437,novel_mir395,novel_mir4859,novel_mir1762,novel_mir209,novel_mir1021,novel_mir1733,novel_mir1115,novel_mir4430,novel_mir4779,novel_mir5876,novel_mir4874,novel_mir782,novel_mir4948,novel_mir295,novel_mir1452,novel_mir2508,novel_mir4264,novel_mir32,novel_mir5357,…	7mer-1a	NA	-32.72	164	Rest	GO:0005829,GO:0000785,GO:0017053,GO:0005634,GO:0046872,GO:0008134,GO:0032403,GO:0001046,GO:0003682,GO:0001078,GO:0015271,GO:0001228,GO:0045665,GO:2000798,GO:0070933,GO:0046676,GO:0032348,GO:0045955,GO:0043280,GO:0002244,GO:2000706,GO:0043922,GO:2000065,GO:0000122,GO:0060379,GO:0071385,GO:0008285,GO:0045893,GO:0035690,GO:0071257,	K09222|1|0.0e+00|2221.4|mmu:19712|RE1-silencing transcription factor	gi|254675343|ref|NP_035393.2|	0	RE1-silencing transcription factor [Mus musculus]
NM_001085501.2	novel_mir3530,novel_mir5223,novel_mir1006,novel_mir2204,novel_mir167,novel_mir3742,novel_mir1129,novel_mir426,novel_mir49,novel_mir1767,novel_mir2954,novel_mir119,novel_mir3541,novel_mir4304,novel_mir1068,novel_mir4556,novel_mir311,novel_mir4508,novel_mir3609,novel_mir6071,novel_mir2386,novel_mir1467,novel_mir3866,novel_mir5117,novel_mir4991,novel_mir919,novel_mir20,novel_mir5498,novel_mir357,nov…	7mer-m8	NA	-69.27	473	Ppp1r3d	GO:0043231,GO:0042587,GO:0019899,GO:0004721,GO:0006470,GO:0005979,GO:0005981,	K07189|1|4.4e-163|579.7|mmu:228966|protein phosphatase 1 regulatory subunit 3A/B/C/D/E	gi|147905969|ref|NP_001078970.1|	0	protein phosphatase 1 regulatory subunit 3D [Mus musculus]
XM_006523569.3	novel_mir3976,novel_mir2808,novel_mir585,novel_mir1710,novel_mir5806,novel_mir4220,novel_mir1423,novel_mir755,novel_mir1855,novel_mir4202,novel_mir6089,novel_mir429,novel_mir2905,novel_mir508,novel_mir2611,novel_mir6031,novel_mir456,novel_mir3360,novel_mir5253,novel_mir1381,novel_mir4803,novel_mir2225,novel_mir3544,novel_mir248,novel_mir1245,novel_mir5641,novel_mir1573,novel_mir1130,novel_mir189,…	7mer-m8	NA	-43.92	285	Col11a2	-	K19721|1|0.0e+00|3415.2|mmu:12815|collagen, type V/XI/XXIV/XXVII, alpha	-	-	-
NM_001163637.1	novel_mir2396,novel_mir683,novel_mir181,novel_mir726,novel_mir36,novel_mir955,novel_mir378,novel_mir729,novel_mir5851,novel_mir282,mmu-miR-671-5p,novel_mir437,novel_mir2394,novel_mir3579,novel_mir2941,novel_mir4381,novel_mir2149,novel_mir3876,mmu-miR-3470b,novel_mir3495,novel_mir2308,novel_mir685,novel_mir989,novel_mir308,novel_mir1566,novel_mir2550,novel_mir679,novel_mir5317,novel_mir1157,novel_…	7mer-m8	NA	-25.22	171	Jakmip2	GO:0005794,	K20478|1|4.7e-102|377.1|lak:106170585|golgin subfamily B member 1	gi|254750662|ref|NP_001157109.1|	0	janus kinase and microtubule-interacting protein 2 [Mus musculus]
NM_033603.3	novel_mir1932,novel_mir2906,novel_mir1135,novel_mir1432,novel_mir431,novel_mir437,novel_mir659,novel_mir4741,novel_mir58,novel_mir345,novel_mir3689,novel_mir181,mmu-miR-29a-3p,novel_mir683,novel_mir2767,mmu-miR-8114,novel_mir3739,novel_mir1204,novel_mir1681,novel_mir1365,novel_mir4290,novel_mir3787,novel_mir4744,novel_mir2068,novel_mir4068,novel_mir634,novel_mir4481,mmu-miR-872-5p,novel_mir3190,n…	6mer	NA	-23.64	152	Amn	GO:0016021,GO:0043234,GO:0031526,GO:0070062,GO:0005615,GO:0030139,GO:0005905,GO:0005768,GO:0016324,GO:0005102,GO:0007275,GO:0043001,GO:0015889,GO:0007588,GO:0006898,	K18259|1|2.2e-267|925.2|mmu:93835|protein amnionless	gi|28077083|ref|NP_291081.2|	0	protein amnionless precursor [Mus musculus]
NM_054050.2	novel_mir502,novel_mir1259,novel_mir4712,novel_mir6056,novel_mir2312,novel_mir4804,novel_mir2003,novel_mir698,novel_mir759,novel_mir2784,novel_mir1632,novel_mir5561,novel_mir5608,novel_mir2246,novel_mir159,novel_mir5277,novel_mir1769,novel_mir2202,novel_mir224,novel_mir2597,mmu-miR-1934-5p,novel_mir898,novel_mir389,novel_mir3533,novel_mir3868,novel_mir1042,novel_mir1681,novel_mir1482,novel_mir276…	6mer	NA	-23.75	163	Rapgef1	-	K06277|1|0.0e+00|2077.4|cge:100764804|Rap guanine nucleotide exchange factor 1	gi|84875506|ref|NP_001034176.1|	0	rap guanine nucleotide exchange factor 1 isoform 1 [Mus musculus]
NM_030557.3	novel_mir3887,novel_mir818,mmu-miR-18b-5p,novel_mir1062,novel_mir684,novel_mir886,mmu-miR-143-5p,novel_mir717,novel_mir4050,novel_mir2690,novel_mir749,novel_mir1032,novel_mir4763,novel_mir2831,mmu-miR-540-3p,novel_mir5994,mmu-miR-146a-5p,novel_mir3191,novel_mir4520,novel_mir3054,novel_mir5940,novel_mir56,mmu-miR-7058-5p,novel_mir2366,novel_mir1292,novel_mir5121,novel_mir4570,novel_mir1844,novel_m…	7mer-m8	NA	-21.7	142	Mynn	GO:0005634,GO:0046872,GO:0003677,GO:0006355,	K09228|1|2.3e-71|275.8|obi:106873063|KRAB domain-containing zinc finger protein	gi|41056113|ref|NP_085034.2|	0	myoneurin isoform 1 [Mus musculus]
[truncated: 12,985 more rows]

## Sheet: Control and model groups
GeneID	miRNA	TargetScan site type	TargetScan NA	miRanda MEF	miRanda score	Symbol	GO term	Pathway	NR id	NR evalue	NR description
[truncated: 4 more rows]

## Sheet: Control-noni-colchicine groups
GeneID	miRNA	TargetScan site type	TargetScan NA	miRanda MEF	miRanda score	Symbol	GO term	Pathway	NR id	NR evalue	NR description
[truncated: 32 more rows]

[truncated: 11 more sheets: Control and noni fruit juice, Control-colchicine-model groups, Control and colchicine, Control group, Model group, Control-noni-model, Noni fruit juice and model, Noni-colchicine-model groups, Noni fruit juice group, Colchicine and model groups, Colchicine group]
