# Supplementary material for: MicroRNAs Involved in the Therapeutic Functions of Noni (Morinda citrifolia L.) Fruit Juice in the Treatment of Acute Gouty Arthritis in Mice Induced with Monosodium Urate
Source: Foods. 2021 Jul 15;10(7):1638. doi: 10.3390/foods10071638 (PMC8308103; doi:10.3390/foods10071638)
Supplement: Supplementary file 1 [file foods-10-01638-s001.zip › Table S5.xlsx]

## Sheet: normal control vs model groups
GO: cellular component		GO: biological process
NLRP3 inflammasome complex		positive regulation of NLRP3 inflammasome complex assembly		negative regulation of NLRP3 inflammasome complex assembly
NM_026960.4	expression pattern	XM_006503857.2	expression pattern	NM_022432.4	expression pattern
novel_mir3887	Up	novel_mir4275	Up	novel_mir558	Up
novel_mir1010	Up	novel_mir3754	Up	novel_mir2646	Up
novel_mir3952	Up	novel_mir5257	Up	novel_mir4926	Up
novel_mir500	Up	novel_mir5780	Up	novel_mir4352	Up
novel_mir4719	Up	novel_mir332	Up	novel_mir370	Up
novel_mir5654	Up	novel_mir2476	Down	novel_mir516	Up
novel_mir5646	Up	novel_mir2361	Down	novel_mir1215	Up
novel_mir1025	Up	novel_mir1105	Down	novel_mir804	Up
mmu-miR-148b-3p	Up	XM_006535624.3		novel_mir616	Up
mmu-miR-148a-3p	Up	novel_mir1573	Up	novel_mir5137	Up
novel_mir679	Down	novel_mir1072	Up	novel_mir3147	Up
novel_mir172	Down	novel_mir3419	Up	novel_mir1570	Up
novel_mir1647	Down	mmu-miR-28a-5p	Up	novel_mir4413	Up
novel_mir2778	Up	novel_mir3107	Up	novel_mir1010	Up
novel_mir5869	Down	novel_mir252	Up	novel_mir3412	Up
novel_mir1740	Down	novel_mir1010	Up	novel_mir1662	Up
novel_mir1540	Down	novel_mir1911	Up	novel_mir484	Up
novel_mir635	Down	novel_mir5796	Up	novel_mir2286	Up
novel_mir585	Down	novel_mir2992	Up	novel_mir4014	Up
novel_mir1777	Down	novel_mir4369	Up	novel_mir5783	Up
novel_mir3011	Down	novel_mir6012	Up	novel_mir2942	Up
novel_mir279	Down	novel_mir400	Up	novel_mir1712	Up
novel_mir1714	Down	novel_mir2250	Up	novel_mir3282	Up
novel_mir186	Down	novel_mir1025	Up	novel_mir1158	Up
NM_009807.2		novel_mir646	Up	novel_mir30	Up
novel_mir4452	Up	novel_mir1946	Up	novel_mir4247	Up
novel_mir450	Down	novel_mir12	Down	novel_mir5681	Up
XM_006532857.1		novel_mir220	Down	novel_mir1076	Up
novel_mir299	Up	novel_mir1294	Down	novel_mir368	Up
novel_mir4718	Up	novel_mir4990	Down	novel_mir400	Up
novel_mir4007	Up	novel_mir150	Down	novel_mir3190	Up
novel_mir280	Up	novel_mir1647	Down	novel_mir6076	Up
novel_mir909	Up	novel_mir5833	Down	novel_mir2140	Up
novel_mir5076	Up	novel_mir1119	Down	novel_mir5402	Up
novel_mir1072	Up	novel_mir3416	Down	novel_mir2771	Up
novel_mir1620	Up	novel_mir52	Down	novel_mir383	Up
novel_mir1062	Up	novel_mir1290	Down	novel_mir4318	Up
novel_mir3686	Up	novel_mir1371	Down	novel_mir2931	Up
novel_mir2366	Up	novel_mir1255	Down	mmu-miR-540-3p	Up
novel_mir5447	Up	novel_mir2452	Down	novel_mir1150	Up
novel_mir794	Up	novel_mir2984	Down	mmu-miR-24-3p	Up
novel_mir4945	Up	novel_mir635	Down	novel_mir227	Up
novel_mir4275	Up	mmu-miR-15a-3p	Down	novel_mir3584	Up
novel_mir109	Up	novel_mir3649	Down	novel_mir5296	Up
novel_mir5792	Up	novel_mir347	Down	novel_mir1369	Up
novel_mir5180	Up	novel_mir127	Down	novel_mir984	Up
novel_mir3952	Up	novel_mir1798	Down	novel_mir1657	Up
novel_mir1961	Up	novel_mir171	Down	novel_mir3	Up
novel_mir1556	Up	NM_153564.2		novel_mir3141	Up
novel_mir4966	Up	novel_mir4612	Up	novel_mir6098	Up
novel_mir4369	Up	novel_mir3495	Up	novel_mir1207	Up
novel_mir463	Up	novel_mir2444	Up	mmu-miR-484	Up
novel_mir1154	Up	novel_mir680	Down	novel_mir3999	Up
novel_mir3099	Up	novel_mir830	Down	novel_mir1679	Up
novel_mir227	Up	novel_mir5352	Down	novel_mir1821	Up
novel_mir282	Up	novel_mir542	Down	novel_mir385	Up
novel_mir238	Up	novel_mir284	Down	novel_mir1822	Up
novel_mir609	Up	novel_mir191	Down	novel_mir3677	Down
novel_mir4451	Up	novel_mir4706	Down	novel_mir298	Down
novel_mir3680	Up	novel_mir435	Down	novel_mir3972	Down
novel_mir802	Up	novel_mir1648	Down	novel_mir1204	Down
novel_mir646	Up	novel_mir4753	Down	novel_mir482	Down
mmu-miR-486b-3p	Up	novel_mir1004	Down	novel_mir164	Down
novel_mir4050	Up	novel_mir5596	Down	novel_mir5226	Down
novel_mir3739	Up	novel_mir1403	Down	novel_mir2123	Down
mmu-miR-486a-3p	Up	NM_021297.3		novel_mir3129	Down
novel_mir301	Down	novel_mir4994	Up	novel_mir507	Down
novel_mir12	Down	novel_mir826	Up	novel_mir1762	Down
novel_mir711	Down	novel_mir4792	Up	novel_mir3697	Down
novel_mir3229	Down	novel_mir4411	Up	novel_mir2887	Down
novel_mir2826	Down	novel_mir909	Up	novel_mir382	Down
novel_mir729	Down	novel_mir6132	Up	novel_mir2441	Down
novel_mir3516	Down	novel_mir5793	Up	novel_mir342	Down
novel_mir1294	Down	novel_mir5357	Up	novel_mir5291	Down
novel_mir3919	Down	mmu-miR-6961-5p	Up	novel_mir862	Down
novel_mir345	Down	novel_mir3555	Up	novel_mir364	Down
novel_mir164	Down	novel_mir3731	Up	novel_mir1733	Down
novel_mir1488	Down	novel_mir4412	Up	novel_mir4331	Down
novel_mir1749	Down	novel_mir3155	Up	novel_mir1354	Down
novel_mir997	Down	novel_mir3757	Up	novel_mir160	Down
novel_mir3627	Down	novel_mir1570	Up	novel_mir1487	Down
novel_mir1966	Down	novel_mir5342	Up	novel_mir1647	Down
novel_mir2657	Down	novel_mir4676	Up	novel_mir2175	Down
novel_mir480	Down	novel_mir3412	Up	novel_mir5051	Down
novel_mir3800	Down	novel_mir5716	Up	novel_mir1955	Down
novel_mir496	Down	novel_mir4021	Up	novel_mir1390	Down
novel_mir1241	Down	novel_mir4501	Up	novel_mir1894	Down
novel_mir1191	Down	novel_mir2089	Up	novel_mir1473	Down
novel_mir6034	Down	novel_mir5980	Up	novel_mir2202	Down
novel_mir1992	Down	novel_mir4661	Up	novel_mir4203	Down
novel_mir6093	Down	novel_mir557	Up	novel_mir2394	Down
novel_mir1119	Down	novel_mir4459	Up	novel_mir1841	Down
novel_mir5294	Down	novel_mir1162	Up	novel_mir1003	Down
novel_mir3902	Down	novel_mir4776	Up	novel_mir3259	Down
novel_mir3416	Down	novel_mir5856	Up	novel_mir2407	Down
novel_mir3654	Down	novel_mir2091	Up	novel_mir4489	Down
novel_mir3139	Down	novel_mir465	Up	novel_mir5514	Down
novel_mir580	Down	novel_mir1701	Up	novel_mir1068	Down
novel_mir1894	Down	novel_mir2644	Up	novel_mir1519	Down
novel_mir4554	Down	novel_mir884	Up	novel_mir3552	Down
novel_mir1290	Down	novel_mir177	Up	novel_mir5464	Down
novel_mir2426	Down	novel_mir3741	Up	novel_mir269	Down
novel_mir2516	Down	novel_mir1187	Up	novel_mir1441	Down
novel_mir134	Down	novel_mir1019	Up	novel_mir3908	Down
novel_mir1213	Down	novel_mir5275	Up	novel_mir2222	Down
novel_mir898	Down	novel_mir5328	Up	novel_mir1463	Down
novel_mir361	Down	novel_mir5979	Up	novel_mir1229	Down
novel_mir2615	Down	novel_mir4998	Up	novel_mir866	Down
novel_mir269	Down	novel_mir400	Up	novel_mir712	Down
novel_mir1073	Down	novel_mir4226	Up	novel_mir1884	Down
novel_mir1574	Down	novel_mir463	Up	novel_mir791	Down
novel_mir1050	Down	novel_mir440	Up	novel_mir509	Down
novel_mir2145	Down	novel_mir2194	Up	novel_mir146	Down
novel_mir2155	Down	novel_mir6001	Up	novel_mir310	Down
novel_mir2530	Down	novel_mir2792	Up	novel_mir3340	Down
novel_mir5227	Down	novel_mir3518	Up	novel_mir5027	Down
novel_mir1482	Down	novel_mir4015	Up	novel_mir5062	Down
novel_mir487	Down	novel_mir2140	Up	novel_mir1237	Down
novel_mir2068	Down	novel_mir2837	Up	novel_mir551	Down
novel_mir1253	Down	novel_mir2250	Up	novel_mir5595	Down
novel_mir540	Down	novel_mir2103	Up	novel_mir771	Down
novel_mir158	Down	novel_mir5994	Up	novel_mir2371	Down
novel_mir446	Down	novel_mir5582	Up	novel_mir297	Down
novel_mir4303	Down	novel_mir6020	Up	novel_mir4749	Down
novel_mir5764	Down	novel_mir1780	Up	novel_mir1226	Down
novel_mir1317	Down	novel_mir4318	Up	novel_mir5689	Down
novel_mir5481	Down	novel_mir2716	Up	novel_mir1669	Down
novel_mir1023	Down	novel_mir75	Up	novel_mir4228	Down
novel_mir3332	Down	novel_mir1814	Up	novel_mir3044	Down
novel_mir883	Down	novel_mir4441	Up	novel_mir5253	Down
novel_mir3202	Down	novel_mir3671	Up	novel_mir1910	Down
novel_mir5910	Down	mmu-miR-1198-5p	Up	novel_mir1468	Down
novel_mir2200	Down	novel_mir4216	Up	novel_mir2293	Down
novel_mir1343	Down	novel_mir5654	Up	novel_mir4508	Down
novel_mir290	Down	novel_mir1792	Up	novel_mir3263	Down
novel_mir6149	Down	novel_mir1850	Up	novel_mir592	Down
novel_mir4138	Down	novel_mir6098	Up	novel_mir2430	Down
novel_mir274	Down	novel_mir1589	Up	novel_mir357	Down
novel_mir4105	Down	mmu-miR-150-5p	Up	novel_mir4105	Down
novel_mir3771	Down	mmu-miR-148b-3p	Up	novel_mir475	Down
novel_mir3494	Down	novel_mir3752	Up	novel_mir115	Down
novel_mir115	Down	mmu-miR-203-3p	Up	mmu-miR-193a-5p	Down
novel_mir127	Down	novel_mir323	Up	novel_mir691	Down
novel_mir691	Down	novel_mir4034	Down	novel_mir3840	Down
novel_mir1004	Down	novel_mir2826	Down	novel_mir837	Down
novel_mir3609	Down	novel_mir729	Down	novel_mir1877	Down
novel_mir322	Down	novel_mir3562	Down	novel_mir87	Down
novel_mir2298	Down	novel_mir513	Down	novel_mir193	Down
novel_mir406	Down	novel_mir1204	Down	novel_mir2132	Down
novel_mir87	Down	novel_mir3707	Down	novel_mir5596	Down
novel_mir171	Down	novel_mir2535	Down	mmu-miR-709	Down
novel_mir333	Down	novel_mir233	Down	novel_mir455	Down
novel_mir2132	Down	novel_mir1516	Down	novel_mir180	Down
novel_mir410	Down	novel_mir316	Down	novel_mir3589	Down
novel_mir7	Down	novel_mir858	Down	novel_mir1403	Down
mmu-miR-709	Down	novel_mir4563	Down	novel_mir1180	Down
novel_mir395	Down	novel_mir1488	Down	novel_mir819	Down
novel_mir1381	Down	novel_mir723	Down	novel_mir3469	Down
novel_mir1403	Down	novel_mir605	Down	NM_019453.2
novel_mir3770	Down	novel_mir1762	Down	novel_mir558	Up
novel_mir768	Down	novel_mir153	Down	novel_mir4685	Up
novel_mir973	Down	novel_mir1291	Down	novel_mir4718	Up
		novel_mir4624	Down	novel_mir2646	Up
		novel_mir389	Down	novel_mir3753	Up
		novel_mir4990	Down	novel_mir1681	Up
		novel_mir488	Down	novel_mir5379	Up
		novel_mir3851	Down	novel_mir4103	Up
		novel_mir2564	Down	mmu-miR-497a-5p	Up
		novel_mir4475	Down	novel_mir4612	Up
		novel_mir496	Down	novel_mir3657	Up
		novel_mir2045	Down	novel_mir1766	Up
		novel_mir4008	Down	novel_mir616	Up
		novel_mir2943	Down	novel_mir2078	Up
		novel_mir975	Down	novel_mir3733	Up
		novel_mir1733	Down	novel_mir5300	Up
		novel_mir3243	Down	novel_mir3878	Up
		novel_mir2104	Down	novel_mir722	Up
		novel_mir4108	Down	novel_mir4053	Up
		novel_mir5833	Down	novel_mir5354	Up
		novel_mir808	Down	novel_mir4014	Up
		novel_mir3103	Down	novel_mir846	Up
		novel_mir1119	Down	novel_mir3153	Up
		novel_mir4348	Down	novel_mir3952	Up
		novel_mir1399	Down	novel_mir695	Up
		novel_mir5767	Down	novel_mir704	Up
		novel_mir5058	Down	novel_mir461	Up
		novel_mir1348	Down	novel_mir5275	Up
		novel_mir4752	Down	novel_mir5328	Up
		novel_mir2906	Down	novel_mir5056	Up
		novel_mir2100	Down	novel_mir4544	Up
		novel_mir4554	Down	novel_mir2805	Up
		novel_mir685	Down	novel_mir403	Up
		novel_mir1644	Down	novel_mir2792	Up
		novel_mir5348	Down	novel_mir1569	Up
		novel_mir1230	Down	novel_mir162	Up
		novel_mir1206	Down	novel_mir4777	Up
		novel_mir1871	Down	novel_mir383	Up
		novel_mir902	Down	novel_mir397	Up
		novel_mir4767	Down	novel_mir3285	Up
		novel_mir5410	Down	novel_mir2147	Up
		novel_mir4807	Down	novel_mir432	Up
		novel_mir1495	Down	mmu-miR-484	Up
		novel_mir1068	Down	mmu-miR-322-5p	Up
		novel_mir5031	Down	novel_mir5145	Up
		novel_mir2182	Down	mmu-miR-151-5p	Up
		novel_mir3234	Down	novel_mir5780	Up
		novel_mir4831	Down	mmu-miR-15b-5p	Up
		novel_mir4273	Down	novel_mir1862	Up
		novel_mir1371	Down	novel_mir332	Up
		novel_mir4706	Down	novel_mir5251	Down
		novel_mir205	Down	novel_mir2476	Down
		novel_mir3329	Down	novel_mir32	Down
		novel_mir2032	Down	novel_mir679	Down
		novel_mir4549	Down	novel_mir1537	Down
		novel_mir509	Down	novel_mir535	Down
		novel_mir2915	Down	novel_mir879	Down
		novel_mir2310	Down	novel_mir683	Down
		novel_mir1255	Down	novel_mir2887	Down
		novel_mir1253	Down	novel_mir3627	Down
		novel_mir4991	Down	novel_mir488	Down
		novel_mir2376	Down	novel_mir4745	Down
		novel_mir4386	Down	novel_mir95	Down
		novel_mir5943	Down	novel_mir862	Down
		novel_mir1193	Down	novel_mir166	Down
		novel_mir4287	Down	novel_mir2495	Down
		novel_mir2207	Down	novel_mir66	Down
		novel_mir1648	Down	novel_mir1354	Down
		novel_mir2755	Down	novel_mir4106	Down
		novel_mir3009	Down	novel_mir4108	Down
		novel_mir5301	Down	novel_mir1377	Down
		novel_mir102	Down	novel_mir437	Down
		novel_mir2684	Down	novel_mir5373	Down
		novel_mir760	Down	novel_mir4551	Down
		novel_mir4220	Down	novel_mir2906	Down
		novel_mir5770	Down	novel_mir894	Down
		novel_mir2632	Down	novel_mir4554	Down
		novel_mir1258	Down	novel_mir685	Down
		novel_mir1020	Down	novel_mir2394	Down
		novel_mir2069	Down	novel_mir2838	Down
		novel_mir4399	Down	novel_mir304	Down
		novel_mir4753	Down	novel_mir801	Down
		novel_mir4909	Down	novel_mir137	Down
		novel_mir300	Down	novel_mir1003	Down
		novel_mir3263	Down	novel_mir3311	Down
		novel_mir2694	Down	novel_mir1209	Down
		novel_mir3396	Down	novel_mir1740	Down
		novel_mir4769	Down	novel_mir601	Down
		novel_mir2430	Down	novel_mir5464	Down
		novel_mir433	Down	novel_mir4706	Down
		novel_mir3797	Down	novel_mir2773	Down
		novel_mir3438	Down	novel_mir3521	Down
		novel_mir347	Down	novel_mir205	Down
		novel_mir357	Down	novel_mir1249	Down
		novel_mir127	Down	novel_mir2330	Down
		novel_mir1531	Down	novel_mir3159	Down
		novel_mir618	Down	novel_mir2145	Down
		novel_mir1877	Down	novel_mir4163	Down
		novel_mir3537	Down	novel_mir409	Down
		novel_mir2477	Down	mmu-miR-5114	Down
		novel_mir5596	Down	novel_mir4111	Down
		novel_mir455	Down	novel_mir1226	Down
		novel_mir4431	Down	novel_mir585	Down
		novel_mir1920	Down	novel_mir1367	Down
		novel_mir544	Down	novel_mir5049	Down
		novel_mir395	Down	novel_mir5841	Down
		novel_mir180	Down	novel_mir5512	Down
		novel_mir388	Down	novel_mir6133	Down
		novel_mir4392	Down	novel_mir3507	Down
				novel_mir946	Down
				novel_mir3396	Down
				novel_mir4769	Down
				novel_mir592	Down
				novel_mir347	Down
				novel_mir3771	Down
				novel_mir319	Down
				novel_mir197	Down
				novel_mir201	Down
				novel_mir348	Down
				novel_mir2477	Down
				novel_mir2132	Down
				novel_mir1211	Down
				novel_mir388	Down
				novel_mir1694	Down

## Sheet: normal control vs fruit juice
GO: cellular component		GO: biological process
NLRP3 inflammasome complex		positive regulation of NLRP3 inflammasome complex assembly		negative regulation of NLRP3 inflammasome complex assembly
XM_006532857.1	expression pattern	NM_021297.3	expression pattern	NM_019453.2	expression pattern
novel_mir277	Up	novel_mir530	Up	novel_mir403	Up
novel_mir530	Up	novel_mir4154	Up	novel_mir5755	Up
novel_mir2239	Up	novel_mir5994	Up	novel_mir704	Up
novel_mir317	Up	novel_mir75	Up	novel_mir846	Up
novel_mir1183	Up	novel_mir1166	Up	novel_mir4194	Up
novel_mir843	Up	novel_mir2914	Up	novel_mir5271	Up
novel_mir280	Up	novel_mir3899	Up	novel_mir5486	Up
novel_mir713	Up	novel_mir2089	Up	novel_mir5995	Up
novel_mir2305	Up	novel_mir2969	Up	novel_mir1684	Up
novel_mir1760	Up	novel_mir799	Up	novel_mir4783	Up
novel_mir439	Up	novel_mir1152	Up	novel_mir3702	Up
novel_mir4507	Up	novel_mir4729	Up	novel_mir4507	Up
novel_mir1620	Up	novel_mir713	Up	novel_mir3901	Up
novel_mir4945	Up	novel_mir4021	Up	novel_mir978	Up
novel_mir3400	Up	novel_mir1860	Up	novel_mir2143	Up
novel_mir236	Up	novel_mir5370	Up	novel_mir3661	Up
novel_mir820	Up	novel_mir4989	Up	novel_mir1649	Up
novel_mir1271	Up	novel_mir439	Up	novel_mir2117	Up
novel_mir6120	Up	novel_mir5508	Up	novel_mir418	Up
novel_mir4797	Up	novel_mir2586	Up	novel_mir3260	Up
novel_mir4576	Up	novel_mir3338	Up	novel_mir5507	Up
novel_mir497	Up	novel_mir1110	Up	novel_mir4529	Up
novel_mir2073	Up	novel_mir2758	Up	novel_mir383	Up
novel_mir2687	Up	novel_mir1870	Up	novel_mir461	Up
novel_mir3347	Up	novel_mir1541	Up	novel_mir642	Up
novel_mir1062	Up	novel_mir978	Up	novel_mir2646	Up
novel_mir677	Up	novel_mir603	Up	novel_mir3324	Up
novel_mir3425	Up	novel_mir3007	Up	novel_mir2594	Up
novel_mir1961	Up	novel_mir1649	Up	novel_mir495	Up
novel_mir1600	Up	mmu-miR-6961-5p	Up	novel_mir5748	Up
novel_mir1690	Up	novel_mir5751	Up	novel_mir5084	Up
novel_mir5263	Up	novel_mir2073	Up	novel_mir1287	Up
novel_mir2912	Up	novel_mir4994	Up	novel_mir3753	Up
novel_mir4311	Up	novel_mir3668	Up	novel_mir2332	Up
novel_mir109	Up	novel_mir3347	Up	novel_mir4014	Up
novel_mir460	Up	novel_mir3555	Up	novel_mir1116	Up
novel_mir1812	Up	novel_mir2511	Up	novel_mir6091	Up
novel_mir3361	Up	novel_mir5982	Up	novel_mir6102	Up
novel_mir425	Up	novel_mir607	Up	novel_mir6142	Up
novel_mir495	Up	novel_mir2309	Up	novel_mir608	Up
novel_mir6064	Up	novel_mir5263	Up	novel_mir1240	Up
novel_mir241	Up	novel_mir1764	Up	novel_mir5056	Up
novel_mir4282	Up	novel_mir2091	Up	novel_mir162	Up
novel_mir5461	Up	novel_mir436	Up	novel_mir5810	Up
novel_mir3599	Up	novel_mir460	Up	novel_mir331	Up
novel_mir4804	Up	novel_mir884	Up	novel_mir1338	Up
novel_mir2020	Up	novel_mir4281	Up	novel_mir5300	Up
novel_mir4785	Up	novel_mir1344	Up	novel_mir955	Up
novel_mir5400	Up	novel_mir5041	Up	novel_mir2802	Up
novel_mir4619	Up	novel_mir557	Up	novel_mir5399	Up
novel_mir3069	Up	novel_mir4030	Up	novel_mir1558	Up
novel_mir5394	Up	novel_mir2644	Up	novel_mir4665	Up
novel_mir1154	Up	novel_mir5784	Up	novel_mir1681	Up
novel_mir77	Up	novel_mir4636	Up	novel_mir616	Up
novel_mir3081	Up	novel_mir211	Up	novel_mir865	Up
novel_mir4285	Up	novel_mir423	Up	novel_mir4777	Up
novel_mir5193	Up	novel_mir5480	Up	novel_mir5382	Up
novel_mir3029	Up	novel_mir5798	Up	novel_mir3280	Up
novel_mir971	Up	novel_mir4159	Up	novel_mir3153	Up
novel_mir6027	Up	novel_mir1775	Up	novel_mir4212	Up
novel_mir1915	Up	novel_mir3269	Up	novel_mir4018	Up
novel_mir2137	Up	novel_mir4282	Up	novel_mir722	Up
novel_mir3191	Up	novel_mir1449	Up	novel_mir259	Up
novel_mir1072	Up	novel_mir3778	Up	novel_mir1363	Up
novel_mir1276	Up	novel_mir5774	Up	novel_mir1436	Up
novel_mir5889	Up	novel_mir5211	Up	novel_mir1561	Up
novel_mir3328	Up	novel_mir1769	Up	novel_mir4685	Up
novel_mir2910	Up	novel_mir6136	Up	novel_mir2954	Up
novel_mir2954	Up	novel_mir1402	Up	novel_mir5673	Up
novel_mir945	Up	novel_mir2082	Up	novel_mir5685	Up
novel_mir5358	Up	novel_mir2140	Up	novel_mir4077	Up
novel_mir5580	Up	novel_mir4015	Up	novel_mir919	Up
novel_mir3546	Up	novel_mir976	Up	novel_mir2871	Up
novel_mir4239	Up	novel_mir3741	Up	novel_mir1582	Up
novel_mir5632	Up	novel_mir5238	Up	novel_mir3657	Up
novel_mir3686	Up	novel_mir6057	Up	novel_mir4169	Up
novel_mir4948	Up	novel_mir224	Up	novel_mir2670	Up
novel_mir1440	Up	novel_mir1478	Up	novel_mir3258	Up
novel_mir939	Up	novel_mir4598	Up	novel_mir5185	Up
novel_mir1526	Up	novel_mir4347	Up	novel_mir2827	Up
novel_mir4502	Up	novel_mir2831	Up	novel_mir4597	Up
novel_mir3323	Up	novel_mir5045	Up	novel_mir2704	Up
novel_mir5940	Up	novel_mir5313	Up	novel_mir2048	Up
novel_mir4369	Up	novel_mir5810	Up	novel_mir695	Up
novel_mir2704	Up	novel_mir1188	Up	novel_mir1082	Up
novel_mir299	Up	novel_mir1300	Up	novel_mir1752	Up
novel_mir4816	Up	novel_mir1194	Up	novel_mir657	Up
novel_mir4017	Up	novel_mir1401	Up	novel_mir1569	Up
novel_mir3277	Up	novel_mir746	Up	novel_mir4192	Up
novel_mir1556	Up	novel_mir1338	Up	novel_mir1626	Up
novel_mir4192	Up	novel_mir3904	Up	novel_mir1211	Up
novel_mir6118	Up	novel_mir4788	Up	novel_mir3524	Up
novel_mir1626	Up	novel_mir3742	Up	novel_mir1565	Up
novel_mir1565	Up	novel_mir6108	Up	novel_mir2394	Up
novel_mir1218	Up	novel_mir4712	Up	novel_mir4520	Up
novel_mir1023	Up	novel_mir2667	Up	novel_mir1367	Up
novel_mir4451	Up	novel_mir826	Up	novel_mir2951	Up
novel_mir1318	Up	novel_mir4318	Up	novel_mir3507	Up
novel_mir1129	Up	novel_mir5582	Up	novel_mir683	Up
novel_mir3680	Up	novel_mir2137	Up	novel_mir4321	Up
novel_mir446	Up	novel_mir2830	Up	mmu-miR-5114	Up
novel_mir361	Up	novel_mir4630	Up	novel_mir388	Up
novel_mir2426	Up	novel_mir5444	Up	novel_mir3396	Up
novel_mir1482	Up	novel_mir5785	Up	novel_mir5049	Up
novel_mir2298	Up	novel_mir3191	Up	mmu-miR-15b-5p	Up
novel_mir2657	Up	novel_mir4089	Up	novel_mir332	Up
novel_mir609	Up	novel_mir3623	Up	novel_mir592	Up
novel_mir1894	Up	novel_mir4953	Up	novel_mir801	Up
novel_mir883	Up	novel_mir1276	Up	novel_mir585	Up
novel_mir898	Up	novel_mir465	Up	novel_mir1377	Up
novel_mir4138	Up	novel_mir2180	Up	novel_mir4800	Up
novel_mir480	Up	novel_mir2402	Up	novel_mir5104	Up
novel_mir1381	Up	novel_mir5812	Up	novel_mir5373	Up
novel_mir5481	Up	novel_mir5844	Up	novel_mir3521	Up
novel_mir1050	Up	novel_mir308	Up	novel_mir1249	Up
novel_mir487	Up	novel_mir4562	Up	novel_mir304	Up
novel_mir7	Up	novel_mir5468	Up	novel_mir2268	Up
novel_mir3770	Down	novel_mir5577	Up	novel_mir32	Down
novel_mir3919	Down	novel_mir3062	Up	novel_mir1537	Down
novel_mir646	Down	novel_mir3050	Up	novel_mir2887	Down
novel_mir1488	Down	novel_mir4763	Up	novel_mir3627	Down
novel_mir3627	Down	novel_mir4174	Up	novel_mir1502	Down
novel_mir1966	Down	novel_mir5685	Up	novel_mir4745	Down
novel_mir6093	Down	novel_mir4403	Up	novel_mir862	Down
novel_mir2163	Down	novel_mir6089	Up	novel_mir1354	Down
novel_mir1119	Down	novel_mir1002	Up	novel_mir4106	Down
novel_mir5294	Down	novel_mir305	Up	novel_mir4108	Down
novel_mir3739	Down	novel_mir2439	Up	novel_mir327	Down
novel_mir3902	Down	novel_mir3412	Up	novel_mir4551	Down
novel_mir3139	Down	novel_mir2879	Up	novel_mir894	Down
novel_mir580	Down	novel_mir4736	Up	novel_mir685	Down
novel_mir134	Down	novel_mir2306	Up	novel_mir5145	Down
novel_mir269	Down	novel_mir3571	Up	novel_mir2838	Down
novel_mir1574	Down	novel_mir939	Up	novel_mir1003	Down
novel_mir2530	Down	novel_mir2250	Up	novel_mir3311	Down
novel_mir5227	Down	novel_mir5653	Up	novel_mir1209	Down
novel_mir2068	Down	novel_mir4226	Up	novel_mir1740	Down
novel_mir1253	Down	novel_mir3188	Up	novel_mir601	Down
novel_mir158	Down	novel_mir5936	Up	novel_mir5464	Down
novel_mir5764	Down	novel_mir4502	Up	novel_mir4706	Down
novel_mir292	Down	novel_mir2486	Up	novel_mir4163	Down
novel_mir4236	Down	novel_mir2955	Up	novel_mir409	Down
novel_mir3202	Down	novel_mir3728	Up	novel_mir4111	Down
novel_mir5910	Down	novel_mir2369	Up	novel_mir1527	Down
novel_mir2200	Down	novel_mir1506	Up	novel_mir5841	Down
novel_mir6149	Down	novel_mir3004	Up	novel_mir5512	Down
novel_mir6160	Down	novel_mir2729	Up	novel_mir6133	Down
novel_mir1741	Down	novel_mir5024	Up	novel_mir4236	Down
novel_mir3494	Down	novel_mir5417	Up	novel_mir946	Down
novel_mir1749	Down	novel_mir993	Up	novel_mir6160	Down
novel_mir171	Down	novel_mir1432	Up	novel_mir5251	Down
novel_mir3609	Down	novel_mir1332	Up	novel_mir2132	Down
novel_mir2132	Down	novel_mir3472	Up	novel_mir2476	Down
novel_mir3229	Down	novel_mir1181	Up	novel_mir347	Down
novel_mir301	Down	novel_mir499	Up	novel_mir535	Down
novel_mir164	Down	novel_mir512	Up	novel_mir348	Down
novel_mir87	Down	novel_mir564	Up	novel_mir4554	Down
novel_mir406	Down	novel_mir5456	Up	novel_mir319	Down
mmu-miR-133a-3p	Down	novel_mir4621	Up	novel_mir137	Down
novel_mir4554	Down	novel_mir4457	Up	novel_mir95	Down
novel_mir115	Down	novel_mir548	Up	novel_mir679	Down
novel_mir802	Down	novel_mir582	Up	novel_mir3771	Down
novel_mir333	Down	novel_mir3785	Up	novel_mir197	Down
novel_mir3771	Down	novel_mir2173	Up	NM_022432.4
mmu-miR-486b-3p	Down	novel_mir1570	Up	novel_mir1158	Up
novel_mir322	Down	novel_mir5450	Up	novel_mir5783	Up
novel_mir997	Down	novel_mir1054	Up	novel_mir516	Up
novel_mir1213	Down	novel_mir1012	Up	novel_mir1166	Up
novel_mir410	Down	novel_mir4681	Up	novel_mir203	Up
novel_mir1294	Down	mmu-miR-6967-3p	Up	novel_mir30	Up
novel_mir973	Down	novel_mir1371	Up	novel_mir5995	Up
novel_mir3800	Down	novel_mir1246	Up	novel_mir2270	Up
NM_009807.2		novel_mir723	Up	novel_mir5217	Up
novel_mir4729	Up	novel_mir975	Up	novel_mir3400	Up
novel_mir5218	Up	novel_mir808	Up	novel_mir1718	Up
novel_mir2402	Up	novel_mir388	Up	novel_mir578	Up
novel_mir5185	Up	novel_mir323	Up	novel_mir2352	Up
novel_mir1332	Up	novel_mir509	Up	novel_mir3007	Up
NM_026960.4		novel_mir3396	Up	novel_mir4797	Up
novel_mir4719	Up	novel_mir1644	Up	novel_mir4614	Up
novel_mir4783	Up	novel_mir1495	Up	novel_mir1346	Up
novel_mir3347	Up	novel_mir1589	Up	novel_mir4796	Up
novel_mir121	Up	novel_mir5943	Up	novel_mir867	Up
novel_mir500	Up	novel_mir2045	Up	novel_mir986	Up
novel_mir5066	Up	novel_mir1113	Up	novel_mir2942	Up
novel_mir5084	Up	novel_mir5770	Up	novel_mir677	Up
novel_mir994	Up	novel_mir2943	Up	novel_mir2511	Up
novel_mir4147	Up	novel_mir1348	Up	novel_mir1734	Up
novel_mir979	Up	novel_mir1020	Up	novel_mir607	Up
novel_mir955	Up	novel_mir3009	Up	novel_mir841	Up
novel_mir5317	Up	novel_mir3243	Up	novel_mir383	Up
novel_mir1526	Up	novel_mir389	Up	novel_mir59	Up
novel_mir1289	Up	novel_mir1871	Up	novel_mir6076	Up
novel_mir3490	Up	novel_mir5104	Up	novel_mir5270	Up
novel_mir4192	Up	novel_mir5654	Up	novel_mir3591	Up
novel_mir6118	Up	mmu-miR-1198-5p	Up	novel_mir2931	Up
novel_mir1010	Up	novel_mir1920	Down	novel_mir2646	Up
novel_mir1777	Up	novel_mir4034	Down	novel_mir4205	Up
novel_mir585	Up	novel_mir3562	Down	novel_mir3324	Up
novel_mir5654	Up	novel_mir3707	Down	novel_mir1662	Up
mmu-miR-31-5p	Down	novel_mir1488	Down	novel_mir484	Up
mmu-miR-148b-3p	Down	novel_mir5596	Down	novel_mir495	Up
novel_mir1740	Down	novel_mir1291	Down	novel_mir2448	Up
novel_mir742	Down	novel_mir4624	Down	novel_mir832	Up
novel_mir5646	Down	novel_mir4990	Down	novel_mir5699	Up
novel_mir635	Down	novel_mir3851	Down	novel_mir5924	Up
novel_mir3011	Down	novel_mir2104	Down	novel_mir275	Up
mmu-miR-148a-3p	Down	novel_mir4431	Down	novel_mir1449	Up
novel_mir1714	Down	novel_mir4108	Down	novel_mir3160	Up
novel_mir679	Down	novel_mir1119	Down	novel_mir5592	Up
novel_mir5869	Down	novel_mir4348	Down	novel_mir4014	Up
		novel_mir5767	Down	novel_mir2154	Up
		novel_mir5058	Down	novel_mir1402	Up
		mmu-miR-148b-3p	Down	novel_mir370	Up
		novel_mir685	Down	novel_mir2140	Up
		novel_mir902	Down	novel_mir1322	Up
		novel_mir717	Down	novel_mir953	Up
		novel_mir4807	Down	novel_mir6102	Up
		novel_mir5031	Down	novel_mir2869	Up
		novel_mir2182	Down	novel_mir608	Up
		novel_mir3234	Down	novel_mir1366	Up
		novel_mir4831	Down	novel_mir3585	Up
		novel_mir4273	Down	novel_mir1855	Up
		novel_mir4706	Down	novel_mir979	Up
		novel_mir3329	Down	novel_mir728	Up
		novel_mir2032	Down	novel_mir3190	Up
		novel_mir4549	Down	novel_mir5399	Up
		novel_mir4216	Down	novel_mir2624	Up
		novel_mir2915	Down	novel_mir4318	Up
		novel_mir2310	Down	novel_mir2286	Up
		novel_mir1253	Down	novel_mir4376	Up
		novel_mir4991	Down	novel_mir1430	Up
		novel_mir2376	Down	novel_mir2899	Up
		novel_mir4386	Down	novel_mir2561	Up
		novel_mir1193	Down	novel_mir616	Up
		novel_mir3977	Down	novel_mir1096	Up
		novel_mir2207	Down	novel_mir5402	Up
		novel_mir1648	Down	novel_mir4589	Up
		novel_mir5301	Down	novel_mir893	Up
		novel_mir102	Down	novel_mir259	Up
		novel_mir2684	Down	novel_mir3448	Up
		novel_mir4220	Down	novel_mir2699	Up
		novel_mir1258	Down	novel_mir5812	Up
		novel_mir4399	Down	novel_mir4562	Up
		novel_mir4753	Down	novel_mir3062	Up
		novel_mir5701	Down	novel_mir4461	Up
		novel_mir2431	Down	novel_mir1943	Up
		novel_mir140	Down	novel_mir4174	Up
		mmu-miR-203-3p	Down	novel_mir2429	Up
		novel_mir433	Down	novel_mir4403	Up
		novel_mir618	Down	novel_mir1361	Up
		novel_mir3438	Down	novel_mir3744	Up
		novel_mir1516	Down	novel_mir1712	Up
		novel_mir544	Down	novel_mir1002	Up
		novel_mir316	Down	novel_mir5776	Up
		novel_mir3797	Down	novel_mir2253	Up
		novel_mir347	Down	novel_mir3412	Up
		novel_mir1877	Down	novel_mir5825	Up
		novel_mir5917	Down	novel_mir3802	Up
		novel_mir357	Down	novel_mir2306	Up
		novel_mir4554	Down	novel_mir2733	Up
		novel_mir3537	Down	novel_mir1151	Up
		novel_mir233	Down	novel_mir1259	Up
		novel_mir605	Down	novel_mir5686	Up
		novel_mir4563	Down	novel_mir2271	Up
		novel_mir858	Down	novel_mir1289	Up
		novel_mir153	Down	novel_mir4535	Up
		novel_mir4008	Down	novel_mir3497	Up
		mmu-miR-150-5p	Down	novel_mir3358	Up
		novel_mir2535	Down	novel_mir1878	Up
		XM_006503857.2		novel_mir2941	Up
		novel_mir460	Up	novel_mir597	Up
		novel_mir1055	Up	novel_mir1464	Up
		novel_mir4380	Up	novel_mir804	Up
		novel_mir2929	Up	novel_mir2404	Up
		novel_mir2082	Up	novel_mir657	Up
		novel_mir3634	Up	novel_mir2263	Up
		novel_mir1067	Up	novel_mir1570	Up
		novel_mir332	Up	novel_mir1423	Up
		novel_mir4800	Up	novel_mir1010	Up
		novel_mir3754	Down	novel_mir984	Up
		novel_mir2476	Down	novel_mir3	Up
		XM_006535624.3		novel_mir1053	Up
		mmu-miR-28a-5p	Up	novel_mir3044	Up
		novel_mir1747	Up	novel_mir214	Up
		novel_mir1573	Up	novel_mir2394	Up
		novel_mir2386	Up	novel_mir4520	Up
		novel_mir5376	Up	novel_mir1468	Up
		novel_mir4201	Up	novel_mir385	Up
		novel_mir5071	Up	novel_mir4508	Up
		novel_mir405	Up	novel_mir551	Up
		novel_mir5461	Up	novel_mir5027	Up
		novel_mir2059	Up	novel_mir509	Up
		novel_mir3419	Up	novel_mir507	Up
		novel_mir4260	Up	novel_mir1657	Up
		novel_mir4712	Up	novel_mir1133	Up
		novel_mir5382	Up	novel_mir1894	Up
		novel_mir3280	Up	novel_mir592	Up
		novel_mir5286	Up	novel_mir3141	Up
		novel_mir1072	Up	novel_mir1669	Up
		novel_mir1421	Up	novel_mir146	Up
		novel_mir1428	Up	novel_mir297	Up
		novel_mir3313	Up	novel_mir1390	Up
		novel_mir3097	Up	novel_mir1150	Up
		novel_mir1911	Up	novel_mir5104	Up
		novel_mir5825	Up	novel_mir3908	Up
		novel_mir2250	Up	novel_mir866	Up
		novel_mir1486	Up	novel_mir3972	Down
		novel_mir5185	Up	novel_mir3129	Down
		novel_mir4502	Up	novel_mir3697	Down
		novel_mir1289	Up	novel_mir5596	Down
		novel_mir4369	Up	novel_mir2887	Down
		novel_mir1878	Up	novel_mir2441	Down
		novel_mir1027	Up	novel_mir862	Down
		novel_mir2642	Up	novel_mir3999	Down
		novel_mir4049	Up	novel_mir4331	Down
		novel_mir4844	Up	novel_mir1354	Down
		novel_mir1010	Up	novel_mir1955	Down
		novel_mir5158	Up	novel_mir2219	Down
		novel_mir847	Up	novel_mir5296	Down
		novel_mir1371	Up	novel_mir2202	Down
		novel_mir52	Up	novel_mir1822	Down
		novel_mir3649	Up	novel_mir1841	Down
		novel_mir1946	Up	novel_mir1003	Down
		novel_mir5104	Up	novel_mir4489	Down
		novel_mir646	Down	novel_mir5464	Down
		novel_mir4990	Down	novel_mir269	Down
		novel_mir1119	Down	novel_mir1441	Down
		novel_mir2452	Down	novel_mir3584	Down
		novel_mir635	Down	novel_mir2222	Down
		mmu-miR-15a-3p	Down	novel_mir1463	Down
		novel_mir4035	Down	novel_mir4746	Down
		novel_mir1741	Down	novel_mir353	Down
		novel_mir171	Down	novel_mir1369	Down
		novel_mir347	Down	novel_mir310	Down
		novel_mir220	Down	mmu-miR-193a-5p	Down
		novel_mir1798	Down	novel_mir5062	Down
		novel_mir1294	Down	novel_mir1237	Down
		NM_153564.2		novel_mir5595	Down
		novel_mir369	Up	novel_mir2371	Down
		novel_mir2444	Up	novel_mir1207	Down
		novel_mir236	Up	novel_mir3804	Down
		novel_mir1869	Up	novel_mir4749	Down
		novel_mir1340	Up	novel_mir5689	Down
		novel_mir2912	Up	novel_mir4228	Down
		novel_mir5078	Up	novel_mir634	Down
		mmu-miR-1895	Up	novel_mir5253	Down
		novel_mir445	Up	novel_mir1910	Down
		novel_mir2730	Up	novel_mir2293	Down
		novel_mir5759	Up	novel_mir1424	Down
		novel_mir2831	Up	novel_mir838	Down
		novel_mir5193	Up	novel_mir475	Down
		novel_mir4553	Up	novel_mir2132	Down
		novel_mir4497	Up	novel_mir164	Down
		novel_mir464	Up	novel_mir3677	Down
		novel_mir2561	Up	novel_mir87	Down
		novel_mir2271	Up	novel_mir1877	Down
		novel_mir6118	Up	novel_mir193	Down
		novel_mir542	Up	novel_mir1180	Down
		novel_mir230	Up	novel_mir382	Down
		novel_mir191	Up	novel_mir357	Down
		novel_mir5596	Down	novel_mir115	Down
		novel_mir5352	Down	novel_mir837	Down
		novel_mir4706	Down	novel_mir3840	Down
		novel_mir1648	Down	novel_mir758	Down
		novel_mir4753	Down	novel_mir3589	Down
		novel_mir2639	Down	novel_mir103	Down

## Sheet: normal vs postive controls
GO: cellular component		GO: biological process
NLRP3 inflammasome complex		positive regulation of NLRP3 inflammasome complex assembly		negative regulation of NLRP3 inflammasome complex assembly
XM_006532857.1	expression pattern	NM_153564.2	expression pattern	NM_019453.2	expression pattern
novel_mir5889	Up	novel_mir1403	Down	novel_mir461	Up
novel_mir463	Up	novel_mir830	Down	novel_mir558	Up
novel_mir909	Up	novel_mir5352	Down	novel_mir5781	Up
novel_mir2465	Up	novel_mir230	Down	novel_mir4387	Up
novel_mir277	Up	novel_mir542	Down	novel_mir978	Up
novel_mir280	Up	novel_mir284	Down	novel_mir5795	Up
novel_mir3686	Up	novel_mir191	Down	novel_mir6102	Up
novel_mir282	Up	novel_mir4706	Down	novel_mir2646	Up
novel_mir169	Up	novel_mir435	Down	novel_mir1502	Up
novel_mir3139	Up	novel_mir1648	Down	novel_mir3524	Up
novel_mir691	Down	novel_mir4753	Down	novel_mir32	Down
novel_mir301	Down	novel_mir2639	Down	novel_mir388	Down
novel_mir274	Down	novel_mir5277	Down	novel_mir535	Down
novel_mir410	Down	novel_mir5596	Down	novel_mir2477	Down
novel_mir115	Down	novel_mir680	Down	novel_mir2268	Down
novel_mir3516	Down	XM_006535624.3		novel_mir683	Down
novel_mir1294	Down	novel_mir220	Down	novel_mir432	Down
novel_mir973	Down	novel_mir1294	Down	novel_mir3627	Down
novel_mir164	Down	novel_mir646	Down	novel_mir4800	Down
novel_mir322	Down	novel_mir150	Down	novel_mir488	Down
novel_mir646	Down	novel_mir1025	Down	novel_mir4745	Down
novel_mir2298	Down	novel_mir1647	Down	novel_mir95	Down
novel_mir1488	Down	novel_mir5833	Down	novel_mir862	Down
novel_mir1749	Down	novel_mir5104	Down	novel_mir166	Down
novel_mir1403	Down	novel_mir1119	Down	novel_mir836	Down
novel_mir4663	Down	novel_mir3416	Down	novel_mir2495	Down
novel_mir3606	Down	novel_mir52	Down	novel_mir66	Down
novel_mir997	Down	novel_mir3685	Down	novel_mir1354	Down
novel_mir333	Down	novel_mir1290	Down	novel_mir4106	Down
novel_mir3627	Down	novel_mir1371	Down	novel_mir4108	Down
novel_mir4050	Down	novel_mir1255	Down	novel_mir327	Down
novel_mir245	Down	novel_mir2452	Down	novel_mir1694	Down
novel_mir1966	Down	novel_mir635	Down	novel_mir5104	Down
novel_mir2657	Down	novel_mir3649	Down	novel_mir437	Down
novel_mir480	Down	novel_mir4035	Down	novel_mir5373	Down
novel_mir3800	Down	novel_mir1741	Down	novel_mir4551	Down
novel_mir496	Down	novel_mir171	Down	novel_mir5609	Down
novel_mir1241	Down	novel_mir12	Down	novel_mir2906	Down
novel_mir1191	Down	novel_mir347	Down	novel_mir1565	Down
novel_mir6034	Down	mmu-miR-15a-3p	Down	novel_mir894	Down
novel_mir1992	Down	novel_mir1798	Down	novel_mir4554	Down
novel_mir6093	Down	novel_mir127	Down	novel_mir685	Down
novel_mir2163	Down	novel_mir267	Down	novel_mir5145	Down
novel_mir1119	Down	novel_mir1946	Down	novel_mir2394	Down
novel_mir5294	Down	XM_006503857.2		novel_mir2838	Down
novel_mir3739	Down	novel_mir1105	Down	novel_mir304	Down
novel_mir3902	Down	novel_mir2476	Down	novel_mir801	Down
novel_mir3416	Down	novel_mir2361	Down	novel_mir137	Down
novel_mir3654	Down	novel_mir5257	Up	novel_mir5780	Down
novel_mir580	Down	novel_mir4800	Down	novel_mir1003	Down
novel_mir1894	Down	novel_mir3754	Down	novel_mir3311	Down
novel_mir1565	Down	novel_mir5780	Down	novel_mir1209	Down
novel_mir4554	Down	novel_mir1773	Down	novel_mir1740	Down
novel_mir1290	Down	novel_mir332	Down	novel_mir431	Down
novel_mir2426	Down	NM_021297.3		novel_mir601	Down
novel_mir2516	Down	novel_mir463	Up	novel_mir5464	Down
novel_mir134	Down	novel_mir3623	Up	novel_mir4706	Down
novel_mir1213	Down	novel_mir909	Up	novel_mir2773	Down
novel_mir2748	Down	novel_mir5318	Up	novel_mir205	Down
novel_mir4144	Down	novel_mir4387	Up	novel_mir1249	Down
novel_mir898	Down	novel_mir978	Up	novel_mir2330	Down
novel_mir431	Down	novel_mir1246	Up	novel_mir3159	Down
novel_mir361	Down	novel_mir102	Up	novel_mir1862	Down
novel_mir2615	Down	novel_mir513	Down	novel_mir4321	Down
novel_mir269	Down	novel_mir3707	Down	novel_mir2145	Down
mmu-miR-709	Down	novel_mir1877	Down	novel_mir4163	Down
novel_mir1073	Down	novel_mir180	Down	novel_mir409	Down
novel_mir1574	Down	novel_mir4563	Down	novel_mir2147	Down
novel_mir1050	Down	novel_mir1488	Down	novel_mir4111	Down
novel_mir2145	Down	novel_mir723	Down	novel_mir4520	Down
novel_mir2155	Down	novel_mir605	Down	novel_mir332	Down
novel_mir2530	Down	novel_mir388	Down	novel_mir1527	Down
novel_mir5227	Down	novel_mir153	Down	novel_mir1226	Down
novel_mir1482	Down	novel_mir2477	Down	novel_mir585	Down
novel_mir238	Down	novel_mir1291	Down	novel_mir1367	Down
novel_mir1773	Down	novel_mir4624	Down	novel_mir5049	Down
novel_mir487	Down	novel_mir488	Down	novel_mir5841	Down
novel_mir2068	Down	novel_mir3851	Down	novel_mir5512	Down
novel_mir1253	Down	novel_mir2564	Down	novel_mir3507	Down
novel_mir540	Down	novel_mir496	Down	novel_mir946	Down
novel_mir158	Down	novel_mir2045	Down	novel_mir3396	Down
novel_mir446	Down	novel_mir4008	Down	novel_mir4769	Down
novel_mir4303	Down	novel_mir2943	Down	novel_mir592	Down
novel_mir227	Down	novel_mir975	Down	novel_mir456	Down
novel_mir5764	Down	novel_mir1733	Down	novel_mir2951	Down
novel_mir1317	Down	novel_mir3243	Down	novel_mir6160	Down
novel_mir292	Down	novel_mir2104	Down	novel_mir347	Down
novel_mir5481	Down	novel_mir5917	Down	novel_mir2476	Down
novel_mir1023	Down	novel_mir4108	Down	mmu-miR-5114	Down
novel_mir3332	Down	novel_mir5833	Down	novel_mir5251	Down
novel_mir883	Down	novel_mir808	Down	novel_mir201	Down
novel_mir3202	Down	novel_mir5104	Down	mmu-miR-15b-5p	Down
novel_mir5910	Down	novel_mir3103	Down	novel_mir577	Down
novel_mir2200	Down	novel_mir4392	Down	mmu-miR-15a-5p	Down
novel_mir3680	Down	novel_mir1119	Down	mmu-miR-322-5p	Down
novel_mir1343	Down	novel_mir4348	Down	novel_mir197	Down
novel_mir290	Down	novel_mir1399	Down	novel_mir679	Down
novel_mir6149	Down	novel_mir5767	Down	novel_mir1211	Down
novel_mir4138	Down	novel_mir5058	Down	novel_mir319	Down
novel_mir609	Down	novel_mir4752	Down	novel_mir348	Down
novel_mir6160	Down	novel_mir2906	Down	novel_mir3521	Down
novel_mir1741	Down	novel_mir2100	Down	mmu-miR-484	Down
novel_mir171	Down	novel_mir4554	Down	novel_mir2887	Down
novel_mir87	Down	novel_mir4441	Down	NM_022432.4
novel_mir768	Down	novel_mir685	Down	novel_mir922	Up
novel_mir3494	Down	novel_mir1644	Down	novel_mir2743	Up
novel_mir12	Down	novel_mir5348	Down	novel_mir2060	Up
mmu-miR-423-5p	Down	novel_mir3752	Down	novel_mir5924	Up
novel_mir4105	Down	novel_mir1230	Down	novel_mir558	Up
novel_mir3770	Down	novel_mir323	Down	novel_mir4926	Up
mmu-miR-486b-3p	Down	novel_mir1206	Down	novel_mir5795	Up
novel_mir3609	Down	novel_mir1871	Down	novel_mir6102	Up
novel_mir345	Down	novel_mir902	Down	novel_mir2646	Up
novel_mir802	Down	novel_mir4767	Down	novel_mir691	Down
novel_mir1489	Down	novel_mir717	Down	novel_mir298	Down
novel_mir127	Down	novel_mir5410	Down	novel_mir3972	Down
novel_mir3919	Down	novel_mir4807	Down	novel_mir115	Down
novel_mir1129	Down	novel_mir1495	Down	novel_mir1877	Down
mmu-miR-133a-3p	Down	novel_mir5031	Down	novel_mir482	Down
novel_mir395	Down	novel_mir2182	Down	novel_mir164	Down
novel_mir711	Down	novel_mir3234	Down	novel_mir180	Down
novel_mir7	Down	novel_mir4831	Down	novel_mir3129	Down
novel_mir729	Down	novel_mir4273	Down	novel_mir507	Down
mmu-miR-486a-3p	Down	novel_mir1371	Down	novel_mir1403	Down
novel_mir3989	Down	novel_mir3671	Down	novel_mir819	Down
novel_mir4451	Down	novel_mir4706	Down	novel_mir1180	Down
novel_mir2826	Down	novel_mir205	Down	novel_mir382	Down
novel_mir1381	Down	novel_mir3329	Down	novel_mir2441	Down
novel_mir2079	Down	novel_mir2032	Down	novel_mir342	Down
novel_mir406	Down	novel_mir4549	Down	novel_mir103	Down
NM_009807.2		novel_mir4216	Down	novel_mir5291	Down
novel_mir450	Down	novel_mir509	Down	novel_mir862	Down
NM_026960.4		novel_mir2915	Down	novel_mir3999	Down
novel_mir994	Up	novel_mir2310	Down	novel_mir364	Down
novel_mir4719	Up	novel_mir1255	Down	novel_mir1733	Down
novel_mir186	Down	novel_mir1253	Down	novel_mir4331	Down
novel_mir1025	Down	novel_mir4991	Down	novel_mir1354	Down
novel_mir1647	Down	novel_mir2376	Down	novel_mir160	Down
novel_mir5869	Down	novel_mir4386	Down	novel_mir1487	Down
novel_mir1740	Down	novel_mir5943	Down	novel_mir1647	Down
novel_mir1540	Down	novel_mir1850	Down	novel_mir2175	Down
novel_mir742	Down	novel_mir5654	Down	novel_mir1579	Down
novel_mir5646	Down	novel_mir1193	Down	novel_mir5051	Down
novel_mir5654	Down	novel_mir3977	Down	novel_mir5104	Down
novel_mir635	Down	novel_mir4287	Down	novel_mir758	Down
novel_mir585	Down	novel_mir2207	Down	novel_mir1955	Down
novel_mir1777	Down	novel_mir1648	Down	novel_mir1390	Down
novel_mir3011	Down	novel_mir1113	Down	novel_mir2219	Down
mmu-miR-148b-3p	Down	novel_mir2755	Down	novel_mir1821	Down
novel_mir279	Down	novel_mir3009	Down	novel_mir1894	Down
novel_mir1714	Down	novel_mir1814	Down	novel_mir5296	Down
novel_mir172	Down	novel_mir5301	Down	novel_mir1473	Down
novel_mir679	Down	novel_mir2684	Down	novel_mir2202	Down
mmu-miR-148a-3p	Down	novel_mir760	Down	novel_mir984	Down
mmu-miR-31-5p	Down	novel_mir4220	Down	novel_mir1822	Down
		novel_mir5770	Down	novel_mir1679	Down
		novel_mir2632	Down	novel_mir3141	Down
		novel_mir1258	Down	novel_mir659	Down
		novel_mir1020	Down	novel_mir4203	Down
		novel_mir2069	Down	novel_mir2394	Down
		novel_mir4399	Down	novel_mir1841	Down
		novel_mir4753	Down	novel_mir1003	Down
		novel_mir4909	Down	novel_mir3259	Down
		novel_mir300	Down	novel_mir2407	Down
		novel_mir3263	Down	novel_mir4489	Down
		novel_mir2694	Down	novel_mir5514	Down
		novel_mir3396	Down	novel_mir1519	Down
		novel_mir4769	Down	novel_mir3552	Down
		novel_mir2430	Down	novel_mir5464	Down
		novel_mir5277	Down	novel_mir269	Down
		novel_mir5701	Down	novel_mir1441	Down
		novel_mir354	Down	novel_mir3584	Down
		novel_mir2431	Down	novel_mir3908	Down
		novel_mir3797	Down	novel_mir2222	Down
		novel_mir3537	Down	novel_mir1463	Down
		novel_mir347	Down	novel_mir1229	Down
		novel_mir3438	Down	novel_mir866	Down
		novel_mir3562	Down	mmu-miR-709	Down
		novel_mir140	Down	novel_mir353	Down
		mmu-miR-148b-3p	Down	novel_mir712	Down
		novel_mir316	Down	novel_mir1884	Down
		novel_mir233	Down	novel_mir1369	Down
		novel_mir1920	Down	novel_mir791	Down
		novel_mir1516	Down	novel_mir509	Down
		novel_mir1204	Down	novel_mir146	Down
		novel_mir433	Down	novel_mir310	Down
		novel_mir4034	Down	novel_mir1133	Down
		novel_mir1589	Down	novel_mir2124	Down
		novel_mir127	Down	novel_mir3340	Down
		novel_mir5596	Down	novel_mir5027	Down
		novel_mir357	Down	novel_mir5062	Down
		mmu-miR-320-3p	Down	novel_mir1237	Down
		novel_mir395	Down	novel_mir4520	Down
		novel_mir1762	Down	novel_mir551	Down
		novel_mir729	Down	novel_mir5595	Down
		novel_mir1531	Down	novel_mir771	Down
		novel_mir4475	Down	novel_mir2371	Down
		novel_mir6098	Down	novel_mir1207	Down
		novel_mir2826	Down	novel_mir3804	Down
		novel_mir389	Down	novel_mir297	Down
		novel_mir858	Down	novel_mir227	Down
		novel_mir1348	Down	novel_mir4749	Down
		novel_mir1068	Down	novel_mir1226	Down
		mmu-miR-203-3p	Down	novel_mir5689	Down
		mmu-miR-150-5p	Down	novel_mir1669	Down
		novel_mir455	Down	novel_mir4228	Down
		mmu-miR-1198-5p	Down	novel_mir634	Down
				novel_mir5253	Down
				novel_mir1910	Down
				novel_mir1468	Down
				novel_mir385	Down
				novel_mir2293	Down
				novel_mir4508	Down
				novel_mir1657	Down
				novel_mir3263	Down
				novel_mir592	Down
				novel_mir2430	Down
				novel_mir214	Down
				novel_mir456	Down
				novel_mir1424	Down
				novel_mir838	Down
				novel_mir1053	Down
				novel_mir87	Down
				mmu-miR-193a-5p	Down
				novel_mir4105	Down
				novel_mir3677	Down
				novel_mir475	Down
				novel_mir2123	Down
				novel_mir1204	Down
				novel_mir3840	Down
				novel_mir650	Down
				novel_mir3697	Down
				novel_mir5596	Down
				novel_mir193	Down
				novel_mir357	Down
				novel_mir3399	Down
				novel_mir1762	Down
				novel_mir6098	Down
				novel_mir5226	Down
				novel_mir1068	Down
				novel_mir1150	Down
				novel_mir2997	Down
				novel_mir455	Down
				mmu-miR-484	Down
				novel_mir3	Down
				novel_mir3469	Down
				novel_mir2887	Down
				novel_mir837	Down

## Sheet: model vs normal control groups
GO: cellular component		GO: biological process
NLRP3 inflammasome complex		positive regulation of NLRP3 inflammasome complex assembly		negative regulation of NLRP3 inflammasome complex assembly
NM_026960.4	expression pattern	XM_006503857.2	expression pattern	NM_019453.2	expression pattern
novel_mir4783	Up	novel_mir460	Up	novel_mir683	Up
novel_mir3347	Up	novel_mir1055	Up	novel_mir2394	Up
novel_mir172	Up	novel_mir4380	Up	novel_mir5755	Up
novel_mir1777	Up	novel_mir2929	Up	novel_mir1626	Up
novel_mir121	Up	novel_mir2082	Up	novel_mir4194	Up
novel_mir5066	Up	novel_mir3634	Up	novel_mir879	Up
novel_mir5084	Up	novel_mir2361	Up	novel_mir5271	Up
novel_mir585	Up	novel_mir2476	Up	novel_mir5486	Up
novel_mir1647	Up	novel_mir1067	Up	novel_mir1377	Up
novel_mir994	Up	novel_mir1105	Up	novel_mir5995	Up
novel_mir1540	Up	novel_mir3754	Down	novel_mir1684	Up
novel_mir679	Up	novel_mir4275	Down	novel_mir4783	Up
novel_mir4147	Up	novel_mir5257	Down	novel_mir1367	Up
novel_mir979	Up	novel_mir5780	Down	novel_mir3702	Up
novel_mir955	Up	XM_006535624.3		novel_mir4507	Up
novel_mir5317	Up	novel_mir12	Up	mmu-miR-5114	Up
novel_mir1526	Up	novel_mir1371	Up	novel_mir3901	Up
novel_mir1289	Up	novel_mir52	Up	novel_mir801	Up
novel_mir3490	Up	novel_mir1747	Up	novel_mir66	Up
novel_mir4192	Up	novel_mir220	Up	novel_mir978	Up
novel_mir5869	Up	novel_mir150	Up	novel_mir2143	Up
novel_mir6118	Up	novel_mir2386	Up	novel_mir3661	Up
novel_mir4719	Up	novel_mir5376	Up	novel_mir5373	Up
novel_mir279	Up	novel_mir1294	Up	novel_mir1649	Up
novel_mir186	Up	novel_mir3416	Up	novel_mir3507	Up
novel_mir500	Up	novel_mir4201	Up	novel_mir2495	Up
novel_mir2778	Down	novel_mir5071	Up	novel_mir2117	Up
novel_mir5646	Down	novel_mir405	Up	novel_mir488	Up
mmu-miR-148b-3p	Down	novel_mir5461	Up	novel_mir418	Up
novel_mir3887	Down	novel_mir1647	Up	novel_mir3260	Up
mmu-miR-31-5p	Down	novel_mir2059	Up	novel_mir5507	Up
novel_mir742	Down	novel_mir4260	Up	novel_mir304	Up
novel_mir3952	Down	novel_mir3649	Up	novel_mir4529	Up
mmu-miR-148a-3p	Down	novel_mir1255	Up	novel_mir5049	Up
novel_mir1010	Down	novel_mir4712	Up	novel_mir642	Up
novel_mir1025	Down	novel_mir5382	Up	novel_mir3324	Up
novel_mir5654	Down	novel_mir3280	Up	novel_mir166	Up
NM_009807.2		novel_mir5286	Up	novel_mir3521	Up
novel_mir4729	Up	novel_mir1421	Up	novel_mir2594	Up
novel_mir5218	Up	novel_mir5833	Up	novel_mir495	Up
novel_mir2402	Up	novel_mir1428	Up	novel_mir2906	Up
novel_mir450	Up	novel_mir3313	Up	novel_mir5748	Up
novel_mir5185	Up	novel_mir3097	Up	novel_mir1249	Up
novel_mir1332	Up	novel_mir5825	Up	novel_mir5084	Up
novel_mir4452	Down	novel_mir2984	Up	novel_mir585	Up
XM_006532857.1		novel_mir1486	Up	novel_mir2951	Up
novel_mir12	Up	novel_mir5185	Up	novel_mir1287	Up
novel_mir711	Up	novel_mir4502	Up	novel_mir2332	Up
novel_mir277	Up	novel_mir1289	Up	novel_mir1116	Up
novel_mir530	Up	novel_mir1290	Up	novel_mir6091	Up
novel_mir2657	Up	novel_mir1878	Up	novel_mir6102	Up
novel_mir2239	Up	novel_mir1027	Up	novel_mir6142	Up
novel_mir729	Up	novel_mir2642	Up	novel_mir3396	Up
novel_mir480	Up	novel_mir4049	Up	novel_mir608	Up
novel_mir3516	Up	novel_mir127	Up	novel_mir1240	Up
novel_mir1626	Up	novel_mir1798	Up	novel_mir679	Up
novel_mir2826	Up	novel_mir347	Up	novel_mir5810	Up
novel_mir1023	Up	novel_mir5104	Up	novel_mir2330	Up
novel_mir317	Up	novel_mir3685	Up	novel_mir331	Up
novel_mir2426	Up	novel_mir646	Down	novel_mir1338	Up
novel_mir1183	Up	novel_mir3107	Down	novel_mir2145	Up
novel_mir1894	Up	novel_mir252	Down	novel_mir955	Up
novel_mir843	Up	novel_mir5796	Down	novel_mir592	Up
novel_mir361	Up	novel_mir2992	Down	novel_mir2802	Up
novel_mir713	Up	novel_mir6012	Down	novel_mir5399	Up
novel_mir2305	Up	novel_mir400	Down	novel_mir1558	Up
novel_mir1760	Up	novel_mir1010	Down	novel_mir4665	Up
novel_mir446	Up	novel_mir1573	Down	novel_mir865	Up
novel_mir439	Up	novel_mir1025	Down	novel_mir5382	Up
novel_mir4507	Up	novel_mir1072	Down	novel_mir3280	Up
novel_mir3400	Up	novel_mir3419	Down	novel_mir4212	Up
novel_mir898	Up	NM_153564.2		novel_mir205	Up
novel_mir301	Up	novel_mir542	Up	novel_mir4018	Up
novel_mir345	Up	novel_mir369	Up	novel_mir259	Up
novel_mir1218	Up	novel_mir236	Up	novel_mir1363	Up
novel_mir236	Up	novel_mir1869	Up	novel_mir1436	Up
novel_mir820	Up	novel_mir191	Up	novel_mir1561	Up
novel_mir1271	Up	novel_mir680	Up	novel_mir2954	Up
novel_mir6120	Up	novel_mir1340	Up	novel_mir5673	Up
novel_mir1482	Up	novel_mir2912	Up	novel_mir5685	Up
novel_mir4797	Up	novel_mir5078	Up	novel_mir4077	Up
novel_mir1294	Up	mmu-miR-1895	Up	novel_mir919	Up
novel_mir4576	Up	novel_mir445	Up	novel_mir2871	Up
novel_mir3416	Up	novel_mir2730	Up	novel_mir1582	Up
novel_mir1318	Up	novel_mir5759	Up	novel_mir4169	Up
novel_mir497	Up	novel_mir830	Up	novel_mir2670	Up
novel_mir2073	Up	novel_mir2831	Up	novel_mir5251	Up
novel_mir2687	Up	novel_mir5193	Up	novel_mir3258	Up
novel_mir3347	Up	novel_mir4553	Up	novel_mir5185	Up
novel_mir677	Up	novel_mir4497	Up	novel_mir2827	Up
novel_mir3425	Up	novel_mir435	Up	novel_mir2476	Up
novel_mir1600	Up	novel_mir464	Up	novel_mir4597	Up
novel_mir3654	Up	novel_mir2561	Up	novel_mir2704	Up
novel_mir1690	Up	novel_mir5277	Up	novel_mir2048	Up
novel_mir5263	Up	novel_mir2271	Up	novel_mir2773	Up
novel_mir2912	Up	novel_mir284	Up	novel_mir437	Up
novel_mir1191	Up	novel_mir6118	Up	novel_mir535	Up
novel_mir4311	Up	novel_mir1004	Up	novel_mir95	Up
novel_mir1050	Up	novel_mir230	Up	novel_mir1082	Up
novel_mir460	Up	novel_mir1403	Up	novel_mir1752	Up
novel_mir1812	Up	novel_mir2444	Up	novel_mir3159	Up
novel_mir3361	Up	novel_mir4612	Down	novel_mir657	Up
novel_mir425	Up	novel_mir3495	Down	novel_mir4192	Up
novel_mir495	Up	novel_mir5596	Down	novel_mir1226	Up
novel_mir6064	Up	mmu-miR-324-3p	Down	novel_mir1211	Up
novel_mir487	Up	NM_021297.3		novel_mir3524	Up
novel_mir883	Up	novel_mir3396	Up	novel_mir403	Up
novel_mir241	Up	novel_mir4752	Up	novel_mir388	Up
novel_mir4282	Up	novel_mir4347	Up	novel_mir1565	Up
novel_mir5461	Up	novel_mir2831	Up	novel_mir201	Up
novel_mir1241	Up	novel_mir5045	Up	novel_mir4520	Up
novel_mir6034	Up	novel_mir5313	Up	novel_mir3771	Up
novel_mir3599	Up	novel_mir5410	Up	novel_mir704	Up
novel_mir4804	Up	novel_mir1255	Up	novel_mir2477	Up
novel_mir2020	Up	novel_mir5810	Up	novel_mir383	Up
novel_mir4785	Up	novel_mir1188	Up	novel_mir347	Up
novel_mir5400	Up	novel_mir1300	Up	novel_mir846	Up
novel_mir1073	Up	novel_mir496	Up	novel_mir197	Up
novel_mir4619	Up	novel_mir1194	Up	novel_mir4321	Up
novel_mir3069	Up	novel_mir1401	Up	novel_mir5104	Up
novel_mir5394	Up	novel_mir746	Up	novel_mir319	Up
novel_mir2615	Up	novel_mir1399	Up	novel_mir461	Up
novel_mir540	Up	novel_mir1338	Up	novel_mir162	Up
novel_mir77	Up	novel_mir3904	Up	novel_mir5056	Up
novel_mir3081	Up	novel_mir1020	Up	novel_mir558	Down
novel_mir496	Up	novel_mir4788	Up	novel_mir4718	Down
novel_mir5481	Up	novel_mir3742	Up	novel_mir5379	Down
novel_mir4285	Up	novel_mir4287	Up	novel_mir4103	Down
novel_mir5193	Up	novel_mir6108	Up	novel_mir5145	Down
novel_mir3029	Up	novel_mir4712	Up	mmu-miR-497a-5p	Down
novel_mir971	Up	novel_mir2667	Up	novel_mir4612	Down
novel_mir2145	Up	novel_mir2137	Up	novel_mir1766	Down
novel_mir3229	Up	novel_mir2830	Up	novel_mir2078	Down
novel_mir4138	Up	novel_mir4630	Up	novel_mir3733	Down
novel_mir1317	Up	novel_mir5444	Up	novel_mir327	Down
novel_mir6027	Up	novel_mir5785	Up	novel_mir1502	Down
novel_mir1915	Up	novel_mir3191	Up	novel_mir3878	Down
novel_mir2137	Up	novel_mir4089	Up	novel_mir4053	Down
novel_mir3191	Up	novel_mir3623	Up	novel_mir5354	Down
novel_mir1276	Up	novel_mir205	Up	novel_mir4236	Down
novel_mir997	Up	novel_mir4953	Up	novel_mir1527	Down
novel_mir5889	Up	novel_mir1276	Up	novel_mir3952	Down
novel_mir3328	Up	novel_mir2180	Up	novel_mir5275	Down
novel_mir2910	Up	novel_mir5833	Up	novel_mir5328	Down
novel_mir2155	Up	novel_mir2402	Up	novel_mir4544	Down
novel_mir2954	Up	novel_mir5812	Up	novel_mir2805	Down
novel_mir4303	Up	novel_mir5844	Up	novel_mir2792	Down
novel_mir945	Up	novel_mir308	Up	novel_mir397	Down
novel_mir5358	Up	novel_mir4562	Up	novel_mir3285	Down
novel_mir5580	Up	novel_mir5468	Up	novel_mir4685	Down
novel_mir3546	Up	novel_mir5577	Up	novel_mir2147	Down
novel_mir4239	Up	novel_mir3062	Up	mmu-miR-484	Down
novel_mir5632	Up	novel_mir3050	Up	novel_mir1681	Down
novel_mir3800	Up	novel_mir4763	Up	novel_mir432	Down
novel_mir4948	Up	novel_mir4174	Up	novel_mir3753	Down
novel_mir1440	Up	novel_mir5685	Up	novel_mir2646	Down
novel_mir939	Up	novel_mir4909	Up	novel_mir5780	Down
novel_mir1526	Up	novel_mir4403	Up	novel_mir1862	Down
novel_mir1992	Up	novel_mir2069	Up	novel_mir3657	Down
novel_mir4502	Up	novel_mir6089	Up	mmu-miR-151-5p	Down
novel_mir3323	Up	novel_mir1002	Up	mmu-miR-322-5p	Down
novel_mir5940	Up	novel_mir5277	Up	novel_mir616	Down
novel_mir290	Up	novel_mir305	Up	novel_mir431	Down
novel_mir2516	Up	novel_mir2439	Up	NM_022432.4
novel_mir1290	Up	novel_mir2879	Up	novel_mir507	Up
novel_mir1343	Up	novel_mir4736	Up	novel_mir298	Up
novel_mir2704	Up	novel_mir2306	Up	novel_mir3044	Up
novel_mir4816	Up	novel_mir2632	Up	novel_mir2394	Up
novel_mir164	Up	novel_mir3571	Up	novel_mir3677	Up
novel_mir4017	Up	novel_mir939	Up	novel_mir1204	Up
novel_mir3277	Up	novel_mir5653	Up	novel_mir1166	Up
novel_mir4192	Up	novel_mir4008	Up	novel_mir214	Up
novel_mir6118	Up	novel_mir316	Up	novel_mir1894	Up
novel_mir1213	Up	novel_mir3188	Up	novel_mir2123	Up
novel_mir4105	Up	novel_mir5936	Up	novel_mir203	Up
novel_mir2298	Up	novel_mir4502	Up	novel_mir482	Up
novel_mir274	Up	novel_mir2486	Up	novel_mir5995	Up
novel_mir1004	Up	novel_mir2955	Up	novel_mir2270	Up
novel_mir691	Up	novel_mir3728	Up	novel_mir5217	Up
novel_mir127	Up	novel_mir1516	Up	novel_mir1762	Up
novel_mir7	Up	novel_mir2369	Up	novel_mir509	Up
novel_mir1565	Up	novel_mir1506	Up	novel_mir1390	Up
novel_mir1381	Up	novel_mir3004	Up	novel_mir3400	Up
novel_mir1129	Up	novel_mir300	Up	novel_mir1718	Up
novel_mir3771	Up	novel_mir2729	Up	novel_mir551	Up
mmu-miR-709	Up	novel_mir1230	Up	novel_mir1468	Up
novel_mir115	Up	novel_mir5024	Up	novel_mir578	Up
novel_mir2748	Up	novel_mir5417	Up	novel_mir5027	Up
novel_mir1961	Up	novel_mir993	Up	novel_mir2352	Up
novel_mir322	Up	novel_mir760	Up	novel_mir2175	Up
novel_mir1154	Up	novel_mir1432	Up	novel_mir3007	Up
novel_mir1403	Up	novel_mir1332	Up	novel_mir4797	Up
novel_mir4945	Up	novel_mir3472	Up	novel_mir4614	Up
novel_mir768	Up	novel_mir3263	Up	novel_mir1346	Up
novel_mir4718	Down	novel_mir1181	Up	novel_mir4796	Up
novel_mir646	Down	novel_mir499	Up	novel_mir5226	Up
novel_mir4007	Down	novel_mir512	Up	novel_mir867	Up
novel_mir909	Down	novel_mir564	Up	novel_mir986	Up
novel_mir3770	Down	novel_mir5456	Up	novel_mir677	Up
novel_mir5076	Down	novel_mir4621	Up	novel_mir2511	Up
novel_mir3739	Down	novel_mir2694	Up	novel_mir4508	Up
novel_mir2366	Down	novel_mir1068	Up	novel_mir1734	Up
novel_mir5447	Down	novel_mir4457	Up	novel_mir607	Up
novel_mir794	Down	novel_mir548	Up	novel_mir841	Up
novel_mir292	Down	novel_mir582	Up	novel_mir364	Up
novel_mir4275	Down	novel_mir3785	Up	novel_mir59	Up
novel_mir4236	Down	novel_mir1531	Up	novel_mir160	Up
novel_mir5792	Down	novel_mir75	Up	novel_mir5270	Up
novel_mir5180	Down	novel_mir5994	Up	novel_mir3591	Up
novel_mir3952	Down	novel_mir388	Up	novel_mir146	Up
novel_mir2163	Down	novel_mir127	Up	novel_mir4205	Up
novel_mir4966	Down	novel_mir3797	Up	novel_mir3324	Up
novel_mir463	Down	novel_mir357	Up	novel_mir3908	Up
novel_mir3099	Down	novel_mir2477	Up	novel_mir495	Up
novel_mir299	Down	novel_mir3438	Up	novel_mir2448	Up
novel_mir282	Down	novel_mir347	Up	novel_mir832	Up
novel_mir802	Down	novel_mir180	Up	novel_mir866	Up
mmu-miR-486b-3p	Down	novel_mir5104	Up	novel_mir1733	Up
novel_mir227	Down	novel_mir1246	Up	novel_mir5699	Up
mmu-miR-133a-3p	Down	novel_mir433	Up	novel_mir5924	Up
novel_mir1072	Down	novel_mir2140	Up	novel_mir275	Up
novel_mir238	Down	novel_mir4015	Up	novel_mir1449	Up
novel_mir431	Down	novel_mir4318	Up	novel_mir1647	Up
mmu-miR-423-5p	Down	novel_mir5582	Up	novel_mir3160	Up
		novel_mir2089	Up	novel_mir5592	Up
		novel_mir4392	Up	novel_mir2154	Up
		novel_mir455	Up	novel_mir1402	Up
		novel_mir4021	Up	novel_mir1669	Up
		novel_mir884	Up	novel_mir3259	Up
		novel_mir3537	Up	novel_mir1322	Up
		novel_mir4792	Down	novel_mir953	Up
		novel_mir4411	Down	novel_mir6102	Up
		novel_mir909	Down	novel_mir297	Up
		novel_mir6132	Down	novel_mir2869	Up
		novel_mir4216	Down	novel_mir608	Up
		novel_mir5793	Down	novel_mir1366	Up
		novel_mir5357	Down	novel_mir3585	Up
		novel_mir1920	Down	novel_mir1855	Up
		mmu-miR-148b-3p	Down	novel_mir979	Up
		novel_mir3731	Down	novel_mir728	Up
		novel_mir4412	Down	novel_mir5291	Up
		novel_mir3155	Down	novel_mir342	Up
		novel_mir3757	Down	novel_mir791	Up
		novel_mir5342	Down	novel_mir592	Up
		novel_mir4676	Down	novel_mir5399	Up
		novel_mir5716	Down	novel_mir2624	Up
		novel_mir4501	Down	novel_mir4376	Up
		novel_mir5980	Down	novel_mir1430	Up
		novel_mir4661	Down	novel_mir2899	Up
		novel_mir4459	Down	novel_mir2561	Up
		novel_mir4776	Down	novel_mir1096	Up
		novel_mir5856	Down	novel_mir4589	Up
		novel_mir717	Down	novel_mir3340	Up
		novel_mir1701	Down	novel_mir893	Up
		novel_mir177	Down	novel_mir259	Up
		novel_mir1187	Down	novel_mir3448	Up
		novel_mir1019	Down	novel_mir2699	Up
		novel_mir5596	Down	novel_mir5812	Up
		novel_mir5275	Down	novel_mir4562	Up
		novel_mir5328	Down	novel_mir3062	Up
		novel_mir5979	Down	novel_mir4461	Up
		novel_mir3977	Down	novel_mir1943	Up
		novel_mir4998	Down	novel_mir4174	Up
		novel_mir400	Down	novel_mir2429	Up
		novel_mir463	Down	novel_mir1487	Up
		novel_mir440	Down	novel_mir4403	Up
		novel_mir2194	Down	novel_mir1361	Up
		novel_mir6001	Down	novel_mir3744	Up
		novel_mir2792	Down	novel_mir1002	Up
		novel_mir3518	Down	novel_mir5776	Up
		novel_mir2837	Down	novel_mir2253	Up
		novel_mir2103	Down	novel_mir3552	Up
		novel_mir6020	Down	novel_mir712	Up
		novel_mir1780	Down	novel_mir5514	Up
		novel_mir2716	Down	novel_mir5051	Up
		novel_mir4431	Down	novel_mir5825	Up
		mmu-miR-203-3p	Down	novel_mir3802	Up
		novel_mir140	Down	novel_mir2306	Up
		novel_mir1814	Down	novel_mir1473	Up
		novel_mir4441	Down	novel_mir2733	Up
		novel_mir3671	Down	novel_mir1151	Up
		novel_mir4994	Down	novel_mir1259	Up
		mmu-miR-150-5p	Down	novel_mir5686	Up
		novel_mir1792	Down	novel_mir1229	Up
		novel_mir826	Down	novel_mir2271	Up
		novel_mir1570	Down	novel_mir1289	Up
		novel_mir1162	Down	novel_mir771	Up
		novel_mir6098	Down	novel_mir4535	Up
		mmu-miR-1198-5p	Down	novel_mir2407	Up
		novel_mir1850	Down	novel_mir3497	Up
		novel_mir5654	Down	novel_mir3358	Up
		novel_mir723	Up	novel_mir1878	Up
		novel_mir975	Up	novel_mir2941	Up
		novel_mir530	Up	novel_mir597	Up
		novel_mir4154	Up	novel_mir4203	Up
		novel_mir808	Up	novel_mir164	Up
		novel_mir729	Up	novel_mir1884	Up
		novel_mir1371	Up	novel_mir1519	Up
		novel_mir389	Up	novel_mir3263	Up
		novel_mir1204	Up	novel_mir1464	Up
		novel_mir1166	Up	novel_mir382	Up
		novel_mir2045	Up	novel_mir2404	Up
		novel_mir2826	Up	novel_mir657	Up
		novel_mir2914	Up	novel_mir2263	Up
		novel_mir3899	Up	novel_mir1068	Up
		novel_mir2943	Up	novel_mir1226	Up
		novel_mir513	Up	novel_mir4105	Up
		novel_mir2969	Up	novel_mir691	Up
		novel_mir3243	Up	novel_mir1158	Up
		novel_mir799	Up	novel_mir1053	Up
		novel_mir1152	Up	novel_mir4520	Up
		novel_mir4729	Up	novel_mir357	Up
		novel_mir713	Up	mmu-miR-709	Up
		novel_mir1644	Up	novel_mir3840	Up
		novel_mir1860	Up	novel_mir5783	Up
		novel_mir5370	Up	novel_mir115	Up
		novel_mir4989	Up	novel_mir383	Up
		novel_mir439	Up	novel_mir30	Up
		novel_mir5508	Up	novel_mir2931	Up
		novel_mir2586	Up	novel_mir6076	Up
		novel_mir3338	Up	novel_mir180	Up
		novel_mir1762	Up	novel_mir5104	Up
		novel_mir1110	Up	novel_mir819	Up
		novel_mir509	Up	novel_mir3	Up
		novel_mir2758	Up	novel_mir837	Up
		novel_mir1348	Up	novel_mir2140	Up
		novel_mir1495	Up	novel_mir1133	Up
		novel_mir1870	Up	novel_mir3469	Up
		novel_mir1541	Up	novel_mir984	Up
		novel_mir2535	Up	novel_mir2942	Up
		novel_mir4475	Up	novel_mir4318	Up
		novel_mir978	Up	novel_mir1403	Up
		novel_mir603	Up	novel_mir455	Up
		novel_mir3007	Up	novel_mir385	Up
		novel_mir1649	Up	novel_mir2997	Up
		novel_mir5751	Up	novel_mir558	Down
		novel_mir2073	Up	novel_mir5296	Down
		novel_mir488	Up	novel_mir3584	Down
		novel_mir3668	Up	novel_mir3999	Down
		novel_mir3347	Up	novel_mir1369	Down
		novel_mir2511	Up	novel_mir4926	Down
		novel_mir5982	Up	novel_mir4352	Down
		novel_mir1871	Up	novel_mir1207	Down
		novel_mir2564	Up	novel_mir1215	Down
		novel_mir858	Up	novel_mir1822	Down
		novel_mir607	Up	novel_mir5137	Down
		novel_mir233	Up	novel_mir3147	Down
		novel_mir2309	Up	novel_mir2219	Down
		novel_mir5263	Up	novel_mir4413	Down
		novel_mir1764	Up	novel_mir3282	Down
		novel_mir5943	Up	novel_mir4247	Down
		novel_mir3103	Up	novel_mir5681	Down
		novel_mir436	Up	novel_mir5596	Down
		novel_mir460	Up	novel_mir1076	Down
		novel_mir4281	Up	novel_mir368	Down
		novel_mir1344	Up	novel_mir1424	Down
		novel_mir5041	Up	novel_mir400	Down
		novel_mir4030	Up	novel_mir353	Down
		novel_mir2906	Up	novel_mir3804	Down
		novel_mir5784	Up	novel_mir2771	Down
		novel_mir4636	Up	novel_mir4746	Down
		novel_mir1733	Up	novel_mir634	Down
		novel_mir211	Up	mmu-miR-540-3p	Down
		novel_mir423	Up	mmu-miR-24-3p	Down
		novel_mir5480	Up	novel_mir1150	Down
		novel_mir5798	Up	novel_mir227	Down
		novel_mir4159	Up	mmu-miR-484	Down
		novel_mir5348	Up	novel_mir1010	Down
		novel_mir4767	Up	novel_mir1570	Down
		novel_mir1775	Up	novel_mir804	Down
		novel_mir3269	Up	novel_mir6098	Down
		novel_mir4282	Up	novel_mir103	Down
		novel_mir1449	Up	novel_mir1679	Down
		novel_mir3778	Up	novel_mir2646	Down
		novel_mir2100	Up	novel_mir758	Down
		novel_mir5774	Up	novel_mir370	Down
		novel_mir5211	Up	novel_mir616	Down
		novel_mir4563	Up
		novel_mir1206	Up
		novel_mir1769	Up
		novel_mir6136	Up
		novel_mir1402	Up
		novel_mir605	Up
		novel_mir2082	Up
		novel_mir3009	Up
		novel_mir5770	Up
		mmu-miR-6967-3p	Up
		novel_mir976	Up
		novel_mir153	Up
		novel_mir5238	Up
		novel_mir6057	Up
		novel_mir224	Up
		novel_mir1478	Up
		novel_mir4598	Up

## Sheet: model vs positive control
GO: cellular component		GO: biological process
NLRP3 inflammasome complex		positive regulation of NLRP3 inflammasome complex assembly		negative regulation of NLRP3 inflammasome complex assembly
NM_026960.4	expression pattern	XM_006503857.2	expression pattern	NM_019453.2	expression pattern
novel_mir994	Up	novel_mir3754	Down	novel_mir558	Down
novel_mir679	Up	novel_mir4800	Down	mmu-miR-322-5p	Down
novel_mir1025	Down	novel_mir5780	Down	novel_mir2646	Down
novel_mir2778	Down	novel_mir332	Down	mmu-miR-15b-5p	Down
novel_mir5654	Down	novel_mir4275	Down	mmu-miR-484	Down
novel_mir5646	Down	novel_mir1773	Down	novel_mir577	Down
novel_mir3887	Down	novel_mir5257	Down	mmu-miR-15a-5p	Down
novel_mir1010	Down	XM_006535624.3		mmu-miR-151-5p	Down
novel_mir742	Down	novel_mir4990	Up	novel_mir1537	Up
novel_mir3952	Down	novel_mir12	Up	novel_mir879	Up
novel_mir500	Down	novel_mir2984	Up	novel_mir1377	Up
novel_mir186	Down	novel_mir127	Up	novel_mir2887	Up
mmu-miR-148b-3p	Down	novel_mir1573	Down	novel_mir679	Up
mmu-miR-148a-3p	Down	novel_mir646	Down	novel_mir6133	Up
mmu-miR-31-5p	Down	novel_mir1025	Down	novel_mir5251	Up
novel_mir279	Down	novel_mir1072	Down	novel_mir5781	Up
XM_006532857.1		novel_mir3419	Down	novel_mir4387	Up
novel_mir3229	Up	novel_mir3107	Down	novel_mir3771	Up
novel_mir5889	Up	novel_mir252	Down	novel_mir3524	Up
novel_mir3139	Up	novel_mir1010	Down	novel_mir1502	Up
novel_mir711	Up	novel_mir1911	Down	novel_mir2132	Up
novel_mir2826	Up	novel_mir5104	Down	novel_mir319	Up
novel_mir729	Up	novel_mir5796	Down	novel_mir348	Up
novel_mir3919	Up	novel_mir2992	Down	novel_mir4685	Down
novel_mir12	Up	novel_mir4369	Down	novel_mir432	Down
novel_mir2465	Up	novel_mir6012	Down	novel_mir4718	Down
novel_mir3771	Up	novel_mir400	Down	novel_mir3753	Down
novel_mir1004	Up	novel_mir3685	Down	novel_mir2147	Down
novel_mir169	Up	novel_mir2250	Down	novel_mir1681	Down
novel_mir463	Up	mmu-miR-28a-5p	Down	novel_mir5379	Down
novel_mir2132	Up	novel_mir171	Down	novel_mir4103	Down
novel_mir282	Up	novel_mir1946	Down	novel_mir2268	Down
novel_mir406	Up	novel_mir267	Down	novel_mir5145	Down
novel_mir127	Up	NM_153564.2		novel_mir4800	Down
novel_mir299	Down	novel_mir680	Up	mmu-miR-497a-5p	Down
novel_mir4718	Down	novel_mir1004	Up	novel_mir5780	Down
novel_mir646	Down	novel_mir4612	Down	novel_mir4612	Down
novel_mir227	Down	novel_mir230	Down	novel_mir3657	Down
novel_mir4007	Down	novel_mir3495	Down	novel_mir1766	Down
novel_mir4050	Down	novel_mir2444	Down	novel_mir616	Down
novel_mir5076	Down	novel_mir1403	Down	novel_mir2078	Down
novel_mir4663	Down	mmu-miR-324-3p	Down	novel_mir3733	Down
novel_mir1072	Down	NM_021297.3		novel_mir1862	Down
novel_mir238	Down	mmu-miR-148b-3p	Down	novel_mir327	Down
novel_mir245	Down	novel_mir1589	Down	novel_mir5300	Down
novel_mir1620	Down	novel_mir6098	Down	novel_mir431	Down
novel_mir3739	Down	novel_mir140	Down	novel_mir332	Down
novel_mir1062	Down	mmu-miR-6961-5p	Down	novel_mir1565	Down
novel_mir973	Down	mmu-miR-1198-5p	Down	novel_mir3878	Down
novel_mir3606	Down	novel_mir909	Down	novel_mir722	Down
novel_mir691	Down	mmu-miR-150-5p	Down	novel_mir836	Down
novel_mir431	Down	mmu-miR-203-3p	Down	novel_mir5609	Down
novel_mir609	Down	novel_mir1792	Down	novel_mir4053	Down
novel_mir410	Down	mmu-miR-320-3p	Down	novel_mir388	Down
novel_mir2366	Down	novel_mir3537	Down	novel_mir5354	Down
novel_mir3680	Down	novel_mir1920	Down	novel_mir4014	Down
novel_mir1565	Down	novel_mir395	Down	novel_mir846	Down
novel_mir5447	Down	novel_mir2535	Up	novel_mir3153	Down
novel_mir794	Down	novel_mir2826	Up	novel_mir4321	Down
novel_mir1403	Down	novel_mir102	Up	novel_mir1527	Down
novel_mir4945	Down	novel_mir729	Up	novel_mir5104	Down
novel_mir292	Down	novel_mir4990	Up	novel_mir3952	Down
novel_mir4275	Down	novel_mir858	Up	novel_mir695	Down
novel_mir109	Down	novel_mir4034	Up	novel_mir704	Down
novel_mir5792	Down	novel_mir3623	Up	novel_mir4520	Down
novel_mir5180	Down	novel_mir5318	Up	novel_mir5275	Down
novel_mir3952	Down	novel_mir1204	Up	novel_mir5328	Down
novel_mir2163	Down	novel_mir389	Up	novel_mir1694	Down
novel_mir1961	Down	novel_mir1762	Up	novel_mir5056	Down
novel_mir1556	Down	novel_mir1516	Up	novel_mir4544	Down
novel_mir4144	Down	novel_mir4475	Up	novel_mir2805	Down
novel_mir4966	Down	novel_mir233	Up	novel_mir2477	Down
novel_mir4369	Down	novel_mir4387	Up	novel_mir403	Down
novel_mir322	Down	novel_mir618	Up	novel_mir2792	Down
novel_mir274	Down	novel_mir4431	Up	novel_mir1569	Down
novel_mir1154	Down	novel_mir463	Up	novel_mir162	Down
novel_mir2298	Down	novel_mir433	Up	novel_mir4777	Down
novel_mir1773	Down	novel_mir544	Up	novel_mir383	Down
novel_mir2748	Down	novel_mir357	Up	novel_mir397	Down
novel_mir333	Down	novel_mir127	Up	novel_mir3285	Down
novel_mir115	Down	novel_mir1814	Down	NM_022432.4
novel_mir3099	Down	novel_mir4994	Down	novel_mir558	Down
mmu-miR-486b-3p	Down	novel_mir4441	Down	mmu-miR-24-3p	Down
mmu-miR-423-5p	Down	novel_mir3671	Down	novel_mir2646	Down
novel_mir802	Down	novel_mir826	Down	novel_mir6098	Down
novel_mir280	Down	novel_mir4792	Down	novel_mir3	Down
novel_mir768	Down	novel_mir4411	Down	mmu-miR-484	Down
novel_mir4451	Down	novel_mir6132	Down	novel_mir4926	Down
novel_mir171	Down	novel_mir4216	Down	novel_mir87	Down
novel_mir909	Down	novel_mir5654	Down	novel_mir3399	Down
mmu-miR-486a-3p	Down	novel_mir5793	Down	novel_mir650	Down
mmu-miR-133a-3p	Down	novel_mir5357	Down	novel_mir3677	Up
novel_mir3770	Down	novel_mir1850	Down	novel_mir922	Up
novel_mir87	Down	novel_mir3555	Down	novel_mir2887	Up
novel_mir1129	Down	novel_mir3731	Down	novel_mir2743	Up
novel_mir3686	Down	novel_mir3752	Down	novel_mir2060	Up
novel_mir1489	Down	novel_mir4412	Down	novel_mir5924	Up
novel_mir3989	Down	novel_mir3155	Down	novel_mir5226	Up
novel_mir2079	Down	novel_mir3757	Down	novel_mir1204	Up
novel_mir395	Down	novel_mir323	Down	novel_mir1762	Up
novel_mir3609	Down	novel_mir1570	Down	novel_mir3044	Up
NM_009807.2		novel_mir5342	Down	novel_mir3697	Up
novel_mir4452	Down	novel_mir4676	Down	novel_mir837	Up
		novel_mir3412	Down	novel_mir357	Up
		novel_mir5716	Down	novel_mir2132	Up
		novel_mir4021	Down	novel_mir5296	Down
		novel_mir4501	Down	novel_mir3584	Down
		novel_mir2089	Down	novel_mir984	Down
		novel_mir5980	Down	novel_mir227	Down
		novel_mir4661	Down	novel_mir3999	Down
		novel_mir180	Down	novel_mir1369	Down
		novel_mir557	Down	novel_mir3141	Down
		novel_mir4459	Down	novel_mir4352	Down
		novel_mir388	Down	novel_mir370	Down
		novel_mir1162	Down	novel_mir1821	Down
		novel_mir4776	Down	novel_mir516	Down
		novel_mir5856	Down	novel_mir1679	Down
		novel_mir1113	Down	novel_mir103	Down
		novel_mir2091	Down	novel_mir1207	Down
		novel_mir465	Down	novel_mir1215	Down
		novel_mir717	Down	novel_mir1822	Down
		novel_mir1701	Down	novel_mir804	Down
		novel_mir2644	Down	novel_mir616	Down
		novel_mir884	Down	novel_mir1657	Down
		novel_mir177	Down	novel_mir5137	Down
		novel_mir5104	Down	novel_mir3147	Down
		novel_mir3741	Down	novel_mir2219	Down
		novel_mir1187	Down	novel_mir1570	Down
		novel_mir5917	Down	novel_mir691	Down
		novel_mir1019	Down	novel_mir4413	Down
		novel_mir354	Down	novel_mir1010	Down
		novel_mir5275	Down	novel_mir3412	Down
		novel_mir5328	Down	novel_mir758	Down
		novel_mir5979	Down	novel_mir180	Down
		novel_mir3977	Down	novel_mir385	Down
		novel_mir1877	Down	novel_mir819	Down
		novel_mir4998	Down	novel_mir1403	Down
		novel_mir400	Down	novel_mir1662	Down
		novel_mir4226	Down	novel_mir484	Down
		novel_mir440	Down	novel_mir2286	Down
		novel_mir2194	Down	novel_mir4014	Down
		novel_mir4392	Down	novel_mir5783	Down
		novel_mir2477	Down	novel_mir1133	Down
		novel_mir6001	Down	novel_mir1180	Down
		novel_mir2792	Down	novel_mir2942	Down
		novel_mir3518	Down	novel_mir1712	Down
		novel_mir4015	Down	novel_mir5104	Down
		novel_mir2140	Down	novel_mir3282	Down
		novel_mir2837	Down	novel_mir659	Down
		novel_mir2250	Down	novel_mir2124	Down
		novel_mir2103	Down	novel_mir1579	Down
		novel_mir5994	Down	novel_mir1158	Down
		novel_mir5582	Down	novel_mir30	Down
		novel_mir6020	Down	novel_mir4247	Down
		novel_mir1780	Down	novel_mir1053	Down
		novel_mir4318	Down	novel_mir4520	Down
		novel_mir2716	Down	novel_mir5681	Down
		novel_mir75	Down	novel_mir1076	Down
				novel_mir1877	Down
				novel_mir368	Down
				novel_mir1424	Down
				novel_mir400	Down
				novel_mir353	Down
				novel_mir3804	Down
				novel_mir3190	Down
				novel_mir6076	Down
				novel_mir2140	Down
				novel_mir5402	Down
				novel_mir2771	Down
				novel_mir383	Down
				novel_mir4318	Down
				novel_mir115	Down
				novel_mir2931	Down
				novel_mir634	Down
				mmu-miR-540-3p	Down
				novel_mir1150	Down

## Sheet: fruit juice vs positive control
GO: cellular component		GO: biological process
NLRP3 inflammasome complex		positive regulation of NLRP3 inflammasome complex assembly		negative regulation of NLRP3 inflammasome complex assembly
NM_026960.4	expression pattern	XM_006503857.2	expression pattern	NM_019453.2	expression pattern
mmu-miR-31-5p	Up	novel_mir4800	Down	novel_mir1502	Up
novel_mir4783	Down	novel_mir332	Down	novel_mir1537	Up
novel_mir3347	Down	novel_mir460	Down	novel_mir2887	Up
novel_mir1777	Down	novel_mir1055	Down	novel_mir558	Up
novel_mir1025	Down	novel_mir4380	Down	novel_mir6133	Up
novel_mir186	Down	novel_mir2929	Down	novel_mir4236	Up
novel_mir121	Down	novel_mir2082	Down	novel_mir5781	Up
novel_mir500	Down	novel_mir3634	Down	novel_mir4387	Up
novel_mir5066	Down	novel_mir1773	Down	novel_mir5795	Up
novel_mir5084	Down	novel_mir5780	Down	novel_mir2132	Up
novel_mir585	Down	novel_mir1067	Down	novel_mir3771	Up
novel_mir1647	Down	novel_mir1105	Down	novel_mir388	Down
novel_mir5654	Down	novel_mir2361	Down	novel_mir1565	Down
novel_mir1540	Down	novel_mir2476	Down	novel_mir683	Down
novel_mir4147	Down	XM_006535624.3		novel_mir2394	Down
novel_mir979	Down	novel_mir4990	Up	novel_mir403	Down
novel_mir955	Down	novel_mir1371	Down	novel_mir5755	Down
novel_mir5317	Down	novel_mir52	Down	novel_mir2268	Down
novel_mir1526	Down	novel_mir1747	Down	novel_mir4800	Down
novel_mir1289	Down	novel_mir220	Down	novel_mir1626	Down
novel_mir3490	Down	novel_mir5104	Down	novel_mir704	Down
novel_mir4192	Down	novel_mir150	Down	novel_mir4520	Down
novel_mir5869	Down	novel_mir1573	Down	novel_mir432	Down
novel_mir6118	Down	novel_mir2386	Down	novel_mir846	Down
novel_mir1010	Down	novel_mir5376	Down	novel_mir4194	Down
novel_mir4719	Down	novel_mir1294	Down	novel_mir5271	Down
novel_mir279	Down	novel_mir3416	Down	novel_mir4321	Down
novel_mir172	Down	novel_mir1025	Down	novel_mir5486	Down
novel_mir1714	Down	novel_mir4201	Down	novel_mir5995	Down
XM_006532857.1		novel_mir5071	Down	novel_mir1684	Down
novel_mir290	Down	novel_mir405	Down	novel_mir4783	Down
novel_mir2516	Down	novel_mir5461	Down	novel_mir1367	Down
novel_mir1290	Down	novel_mir3685	Down	novel_mir3702	Down
novel_mir1343	Down	novel_mir1647	Down	novel_mir4507	Down
novel_mir4369	Down	novel_mir2059	Down	novel_mir3901	Down
novel_mir2704	Down	novel_mir3419	Down	novel_mir2477	Down
novel_mir299	Down	novel_mir4260	Down	novel_mir5104	Down
novel_mir4816	Down	novel_mir3649	Down	novel_mir801	Down
novel_mir164	Down	novel_mir1255	Down	novel_mir66	Down
novel_mir4017	Down	novel_mir4712	Down	novel_mir2143	Down
novel_mir3277	Down	novel_mir5382	Down	novel_mir3661	Down
novel_mir1556	Down	novel_mir3280	Down	novel_mir5373	Down
novel_mir4192	Down	novel_mir5286	Down	novel_mir1649	Down
novel_mir6118	Down	novel_mir1072	Down	novel_mir3507	Down
novel_mir1213	Down	novel_mir1421	Down	novel_mir2495	Down
novel_mir3332	Down	novel_mir5833	Down	novel_mir2117	Down
novel_mir4554	Down	novel_mir1428	Down	novel_mir488	Down
novel_mir1129	Down	novel_mir3313	Down	novel_mir418	Down
novel_mir768	Down	novel_mir3097	Down	novel_mir3260	Down
novel_mir12	Down	novel_mir1911	Down	novel_mir5507	Down
novel_mir4451	Down	novel_mir5825	Down	novel_mir332	Down
novel_mir4105	Down	novel_mir2250	Down	novel_mir304	Down
novel_mir277	Down	novel_mir1486	Down	novel_mir4529	Down
mmu-miR-423-5p	Down	novel_mir5185	Down	novel_mir383	Down
novel_mir280	Down	novel_mir4502	Down	novel_mir5049	Down
novel_mir7	Down	novel_mir1289	Down	novel_mir642	Down
novel_mir1381	Down	novel_mir1290	Down	novel_mir3324	Down
novel_mir345	Down	novel_mir4369	Down	novel_mir166	Down
novel_mir87	Down	novel_mir1878	Down	novel_mir2594	Down
novel_mir1318	Down	novel_mir1027	Down	novel_mir495	Down
novel_mir711	Down	novel_mir2642	Down	novel_mir2906	Down
novel_mir1489	Down	novel_mir4049	Down	novel_mir5748	Down
mmu-miR-486b-3p	Down	novel_mir4844	Down	novel_mir1249	Down
novel_mir171	Down	novel_mir1010	Down	novel_mir5609	Down
novel_mir127	Down	novel_mir5158	Down	novel_mir5084	Down
novel_mir3989	Down	novel_mir847	Down	novel_mir585	Down
mmu-miR-486a-3p	Down	mmu-miR-28a-5p	Down	novel_mir2951	Down
novel_mir729	Down	novel_mir12	Down	novel_mir1287	Down
novel_mir395	Down	novel_mir1946	Down	novel_mir3753	Down
novel_mir802	Down	novel_mir171	Down	novel_mir2332	Down
novel_mir3686	Down	novel_mir127	Down	novel_mir4014	Down
novel_mir2079	Down	novel_mir347	Down	novel_mir1116	Down
novel_mir2826	Down	novel_mir267	Down	novel_mir6091	Down
novel_mir487	Down	novel_mir1798	Down	novel_mir836	Down
novel_mir883	Down	NM_153564.2		novel_mir6142	Down
novel_mir2748	Down	novel_mir5596	Up	novel_mir3396	Down
novel_mir241	Down	novel_mir542	Down	novel_mir608	Down
novel_mir4282	Down	novel_mir230	Down	novel_mir1240	Down
novel_mir5461	Down	novel_mir369	Down	novel_mir5056	Down
novel_mir1241	Down	novel_mir1403	Down	novel_mir162	Down
novel_mir6034	Down	novel_mir2444	Down	novel_mir5810	Down
novel_mir3599	Down	novel_mir236	Down	novel_mir2330	Down
novel_mir4804	Down	novel_mir1869	Down	novel_mir1694	Down
novel_mir2020	Down	novel_mir191	Down	novel_mir331	Down
novel_mir4785	Down	novel_mir1340	Down	novel_mir1338	Down
novel_mir5400	Down	novel_mir2912	Down	novel_mir2145	Down
novel_mir322	Down	novel_mir5078	Down	novel_mir5300	Down
novel_mir1073	Down	mmu-miR-1895	Down	novel_mir955	Down
novel_mir4619	Down	novel_mir445	Down	novel_mir592	Down
novel_mir3069	Down	novel_mir2730	Down	novel_mir2802	Down
novel_mir5394	Down	novel_mir5759	Down	novel_mir5399	Down
novel_mir2615	Down	novel_mir830	Down	novel_mir1558	Down
novel_mir540	Down	novel_mir2831	Down	novel_mir4665	Down
novel_mir1154	Down	novel_mir5193	Down	novel_mir1681	Down
novel_mir77	Down	novel_mir4553	Down	novel_mir616	Down
novel_mir3081	Down	novel_mir4497	Down	novel_mir865	Down
novel_mir496	Down	novel_mir435	Down	novel_mir4777	Down
novel_mir5481	Down	novel_mir464	Down	novel_mir5382	Down
novel_mir4285	Down	novel_mir2561	Down	novel_mir3280	Down
novel_mir5193	Down	novel_mir5277	Down	novel_mir3153	Down
mmu-miR-709	Down	novel_mir2271	Down	novel_mir4212	Down
novel_mir3029	Down	novel_mir284	Down	novel_mir205	Down
novel_mir238	Down	novel_mir6118	Down	novel_mir4018	Down
novel_mir227	Down	novel_mir680	Down	novel_mir722	Down
novel_mir971	Down	NM_021297.3		novel_mir259	Down
novel_mir609	Down	novel_mir463	Up	novel_mir1363	Down
novel_mir2145	Down	novel_mir4431	Up	novel_mir1436	Down
novel_mir4138	Down	novel_mir102	Up	novel_mir1561	Down
novel_mir1317	Down	novel_mir4990	Up	novel_mir4685	Down
novel_mir6027	Down	novel_mir4034	Up	novel_mir2954	Down
novel_mir1915	Down	novel_mir1920	Up	novel_mir5673	Down
novel_mir2137	Down	novel_mir909	Up	novel_mir5685	Down
novel_mir3191	Down	novel_mir5318	Up	novel_mir4077	Down
novel_mir4144	Down	novel_mir4387	Up	novel_mir2147	Down
novel_mir1072	Down	novel_mir5596	Up	novel_mir919	Down
novel_mir1276	Down	novel_mir3562	Up	novel_mir2871	Down
novel_mir997	Down	mmu-miR-203-3p	Up	novel_mir1582	Down
novel_mir3328	Down	novel_mir618	Up	novel_mir3657	Down
novel_mir2910	Down	novel_mir544	Up	novel_mir5780	Down
novel_mir2155	Down	novel_mir140	Up	novel_mir4169	Down
novel_mir2954	Down	novel_mir723	Down	novel_mir2670	Down
novel_mir4303	Down	novel_mir388	Down	novel_mir3258	Down
novel_mir945	Down	novel_mir975	Down	novel_mir5185	Down
novel_mir5358	Down	novel_mir530	Down	novel_mir2827	Down
novel_mir5580	Down	novel_mir4154	Down	novel_mir431	Down
novel_mir3546	Down	novel_mir808	Down	novel_mir1862	Down
novel_mir4239	Down	novel_mir1371	Down	novel_mir4597	Down
novel_mir1773	Down	novel_mir5994	Down	novel_mir2704	Down
novel_mir5632	Down	novel_mir75	Down	novel_mir2048	Down
novel_mir3800	Down	novel_mir180	Down	novel_mir2773	Down
novel_mir4948	Down	novel_mir1166	Down	novel_mir437	Down
novel_mir1440	Down	novel_mir2045	Down	novel_mir535	Down
novel_mir333	Down	novel_mir2914	Down	novel_mir695	Down
novel_mir939	Down	novel_mir3899	Down	novel_mir95	Down
novel_mir1526	Down	novel_mir2943	Down	novel_mir1082	Down
novel_mir1992	Down	novel_mir513	Down	novel_mir1752	Down
novel_mir431	Down	novel_mir323	Down	novel_mir3159	Down
novel_mir4502	Down	novel_mir2089	Down	novel_mir657	Down
novel_mir463	Up	novel_mir2969	Down	novel_mir1569	Down
novel_mir3139	Up	novel_mir3243	Down	novel_mir4192	Down
novel_mir3770	Up	novel_mir799	Down	novel_mir1226	Down
novel_mir909	Up	novel_mir1152	Down	novel_mir4769	Down
novel_mir3919	Up	novel_mir4729	Down	novel_mir456	Down
novel_mir4236	Up	novel_mir713	Down	novel_mir4554	Down
novel_mir2465	Up	novel_mir4021	Down	novel_mir137	Down
novel_mir282	Up	novel_mir1644	Down	mmu-miR-5114	Down
novel_mir169	Up	novel_mir1860	Down	novel_mir1211	Down
novel_mir2132	Up	novel_mir5370	Down	mmu-miR-15b-5p	Down
novel_mir3229	Up	novel_mir4989	Down	mmu-miR-322-5p	Down
novel_mir5889	Up	novel_mir439	Down	novel_mir577	Down
novel_mir3771	Up	novel_mir5508	Down	novel_mir978	Down
novel_mir691	Down	novel_mir2586	Down	novel_mir201	Down
novel_mir2298	Down	novel_mir3338	Down	novel_mir3521	Down
novel_mir1565	Down	novel_mir2477	Down	novel_mir2646	Down
novel_mir274	Down	novel_mir1110	Down	novel_mir347	Down
novel_mir530	Down	novel_mir5104	Down	mmu-miR-15a-5p	Down
novel_mir2657	Down	novel_mir509	Down	novel_mir3524	Down
novel_mir2239	Down	novel_mir2758	Down	novel_mir6102	Down
novel_mir480	Down	novel_mir1495	Down	novel_mir2476	Down
novel_mir3516	Down	novel_mir1870	Down	novel_mir1377	Down
novel_mir1626	Down	novel_mir1541	Down	novel_mir197	Down
novel_mir4663	Down	novel_mir603	Down	novel_mir461	Down
novel_mir1023	Down	novel_mir3007	Down	novel_mir879	Down
novel_mir317	Down	novel_mir1649	Down	NM_022432.4
novel_mir2426	Down	novel_mir5751	Down	novel_mir922	Up
novel_mir1183	Down	novel_mir2073	Down	novel_mir2887	Up
novel_mir1894	Down	novel_mir488	Down	novel_mir2743	Up
novel_mir843	Down	novel_mir4994	Down	novel_mir2060	Up
novel_mir361	Down	novel_mir3668	Down	novel_mir558	Up
novel_mir713	Down	novel_mir3347	Down	novel_mir4746	Up
novel_mir2305	Down	novel_mir3555	Down	novel_mir4926	Up
novel_mir245	Down	novel_mir2511	Down	novel_mir3697	Up
novel_mir1760	Down	novel_mir5982	Down	novel_mir5795	Up
novel_mir446	Down	novel_mir1871	Down	novel_mir5596	Up
novel_mir439	Down	novel_mir2564	Down	novel_mir2132	Up
novel_mir4507	Down	novel_mir607	Down	novel_mir691	Down
novel_mir1620	Down	novel_mir2309	Down	novel_mir984	Down
novel_mir1403	Down	novel_mir5263	Down	novel_mir507	Down
novel_mir4945	Down	novel_mir1764	Down	novel_mir298	Down
novel_mir3400	Down	novel_mir5943	Down	novel_mir2394	Down
novel_mir898	Down	novel_mir3103	Down	novel_mir1158	Down
novel_mir410	Down	novel_mir2091	Down	novel_mir5783	Down
novel_mir4050	Down	novel_mir436	Down	novel_mir180	Down
novel_mir301	Down	novel_mir460	Down	novel_mir1053	Down
novel_mir1218	Down	novel_mir884	Down	novel_mir516	Down
novel_mir236	Down	novel_mir3752	Down	novel_mir1166	Down
novel_mir820	Down	novel_mir4281	Down	novel_mir4520	Down
novel_mir1271	Down	novel_mir1344	Down	novel_mir819	Down
novel_mir6120	Down	novel_mir5041	Down	novel_mir214	Down
novel_mir1482	Down	novel_mir557	Down	novel_mir1894	Down
novel_mir3680	Down	novel_mir4030	Down	novel_mir203	Down
novel_mir4797	Down	novel_mir1113	Down	novel_mir30	Down
novel_mir1294	Down	novel_mir2906	Down	novel_mir482	Down
novel_mir4576	Down	novel_mir2644	Down	novel_mir5995	Down
novel_mir3416	Down	novel_mir5784	Down	novel_mir3141	Down
novel_mir497	Down	novel_mir4636	Down	novel_mir2270	Down
novel_mir2073	Down	novel_mir1733	Down	novel_mir5217	Down
novel_mir2687	Down	novel_mir211	Down	novel_mir1403	Down
novel_mir3347	Down	novel_mir423	Down	novel_mir5104	Down
novel_mir1062	Down	novel_mir5480	Down	novel_mir509	Down
novel_mir677	Down	novel_mir5798	Down	novel_mir1390	Down
novel_mir973	Down	novel_mir4159	Down	novel_mir3400	Down
novel_mir3425	Down	novel_mir5348	Down	novel_mir1718	Down
novel_mir1961	Down	novel_mir4767	Down	novel_mir551	Down
novel_mir1600	Down	novel_mir1775	Down	novel_mir1468	Down
novel_mir3654	Down	novel_mir3269	Down	novel_mir578	Down
novel_mir1690	Down	novel_mir4282	Down	novel_mir5027	Down
novel_mir5263	Down	novel_mir1449	Down	novel_mir2352	Down
novel_mir2912	Down	novel_mir3778	Down	novel_mir385	Down
novel_mir115	Down	novel_mir2100	Down	novel_mir2175	Down
novel_mir1191	Down	novel_mir5774	Down	novel_mir3007	Down
novel_mir4311	Down	novel_mir5211	Down	novel_mir4797	Down
novel_mir109	Down	novel_mir4563	Down	novel_mir1133	Down
novel_mir1050	Down	novel_mir1206	Down	novel_mir4614	Down
novel_mir460	Down	novel_mir1769	Down	novel_mir1346	Down
novel_mir3606	Down	novel_mir6136	Down	novel_mir4796	Down
novel_mir1812	Down	novel_mir1402	Down	novel_mir867	Down
novel_mir3361	Down	novel_mir605	Down	novel_mir986	Down
novel_mir425	Down	novel_mir2082	Down	novel_mir2942	Down
novel_mir495	Down	novel_mir3009	Down	novel_mir677	Down
novel_mir6064	Down	novel_mir2140	Down	novel_mir2511	Down
NM_009807.2		novel_mir5770	Down	novel_mir4508	Down
novel_mir5218	Down	mmu-miR-6967-3p	Down	novel_mir1734	Down
novel_mir2402	Down	novel_mir4015	Down	novel_mir607	Down
novel_mir450	Down	novel_mir5654	Down	novel_mir841	Down
novel_mir5185	Down	novel_mir976	Down	novel_mir364	Down
novel_mir1332	Down	novel_mir3741	Down	novel_mir383	Down
novel_mir4729	Down	novel_mir153	Down	novel_mir59	Down
		novel_mir5238	Down	novel_mir1821	Down
		novel_mir6057	Down	novel_mir6076	Down
		novel_mir224	Down	novel_mir160	Down
		novel_mir1478	Down	novel_mir5270	Down
		novel_mir4598	Down	novel_mir115	Down
		novel_mir3396	Down	novel_mir3591	Down
		novel_mir4752	Down	novel_mir146	Down
		novel_mir4347	Down	novel_mir2931	Down
		novel_mir4392	Down	novel_mir4205	Down
		novel_mir2831	Down	novel_mir3324	Down
		novel_mir5045	Down	novel_mir3908	Down
		novel_mir5313	Down	novel_mir1662	Down
		novel_mir5410	Down	novel_mir484	Down
		novel_mir1255	Down	novel_mir495	Down
		novel_mir5810	Down	novel_mir2448	Down
		novel_mir1188	Down	novel_mir832	Down
		novel_mir1300	Down	novel_mir866	Down
		novel_mir496	Down	novel_mir1733	Down
		novel_mir1194	Down	novel_mir5699	Down
		novel_mir1401	Down	novel_mir275	Down
		novel_mir746	Down	novel_mir1449	Down
		novel_mir1399	Down	novel_mir1647	Down
		novel_mir1338	Down	novel_mir3160	Down
		novel_mir3904	Down	novel_mir5592	Down
		novel_mir1020	Down	novel_mir4014	Down
		novel_mir4788	Down	novel_mir2154	Down
		novel_mir3742	Down	novel_mir1402	Down
		novel_mir4287	Down	novel_mir370	Down
		novel_mir6108	Down	novel_mir2140	Down
		novel_mir4712	Down	novel_mir1669	Down
		novel_mir2667	Down	novel_mir3259	Down
		novel_mir826	Down	novel_mir1322	Down
		novel_mir4318	Down	novel_mir953	Down
		novel_mir5582	Down	novel_mir1657	Down
		novel_mir2137	Down	novel_mir297	Down
		novel_mir2830	Down	novel_mir2869	Down
		novel_mir4630	Down	novel_mir608	Down
		novel_mir5444	Down	novel_mir1366	Down
		novel_mir5785	Down	novel_mir3585	Down
		novel_mir3191	Down	novel_mir1855	Down
		novel_mir1877	Down	novel_mir979	Down
		novel_mir4089	Down	mmu-miR-709	Down
		novel_mir205	Down	novel_mir728	Down
		novel_mir4953	Down	novel_mir5291	Down
		novel_mir1276	Down	novel_mir3190	Down
		novel_mir3671	Down	novel_mir227	Down
		novel_mir465	Down	novel_mir342	Down
		novel_mir2180	Down	novel_mir791	Down
		novel_mir5833	Down	novel_mir592	Down
		novel_mir2402	Down	novel_mir5399	Down
		novel_mir5812	Down	novel_mir2624	Down
		novel_mir5844	Down	novel_mir4318	Down
		novel_mir308	Down	novel_mir2286	Down
		novel_mir4562	Down	novel_mir4376	Down
		novel_mir5468	Down	novel_mir1430	Down
		novel_mir5577	Down	novel_mir2899	Down
		novel_mir3062	Down	novel_mir2561	Down
		novel_mir3050	Down	novel_mir616	Down
		novel_mir4763	Down	novel_mir1096	Down
		novel_mir4174	Down	novel_mir5402	Down
		novel_mir5685	Down	novel_mir4589	Down
		novel_mir4909	Down	novel_mir3340	Down
		novel_mir4403	Down	novel_mir1877	Down
		novel_mir1850	Down	novel_mir893	Down
		novel_mir2069	Down	novel_mir259	Down
		novel_mir6089	Down	novel_mir3448	Down
		novel_mir1002	Down	novel_mir2699	Down
		novel_mir5277	Down	novel_mir5812	Down
		novel_mir305	Down	novel_mir4562	Down
		novel_mir2439	Down	novel_mir3062	Down
		novel_mir3412	Down	novel_mir4461	Down
		novel_mir2879	Down	novel_mir1943	Down
		novel_mir4736	Down	novel_mir4174	Down
		novel_mir2306	Down	novel_mir2429	Down
		novel_mir2632	Down	novel_mir1487	Down
		novel_mir3571	Down	novel_mir4403	Down
		novel_mir939	Down	novel_mir1361	Down
		novel_mir2250	Down	novel_mir3744	Down
		novel_mir5653	Down	novel_mir1712	Down
		novel_mir4008	Down	novel_mir1002	Down
		novel_mir4226	Down	novel_mir5776	Down
		novel_mir3188	Down	novel_mir2253	Down
		novel_mir5936	Down	novel_mir3552	Down
		novel_mir4502	Down	novel_mir712	Down
		novel_mir2486	Down	novel_mir5514	Down
		novel_mir1814	Down	novel_mir3412	Down
		novel_mir2955	Down	novel_mir5051	Down
		novel_mir3728	Down	novel_mir5825	Down
		novel_mir2369	Down	novel_mir3802	Down
		novel_mir1506	Down	novel_mir2306	Down
		novel_mir3004	Down	novel_mir1473	Down
		novel_mir300	Down	novel_mir1679	Down
		novel_mir2729	Down	novel_mir2733	Down
		novel_mir1230	Down	novel_mir1151	Down
		novel_mir5024	Down	novel_mir1259	Down
		novel_mir4441	Down	novel_mir5686	Down
		novel_mir5417	Down	novel_mir2124	Down
		novel_mir993	Down	novel_mir1229	Down
		novel_mir760	Down	novel_mir1579	Down
		novel_mir1432	Down	novel_mir2271	Down
		novel_mir1332	Down	novel_mir1289	Down
		novel_mir3472	Down	novel_mir103	Down
		novel_mir3263	Down	novel_mir659	Down
		novel_mir1181	Down	novel_mir771	Down
		novel_mir499	Down	novel_mir4535	Down
		novel_mir512	Down	novel_mir2407	Down
		novel_mir564	Down	novel_mir3497	Down
		novel_mir5456	Down	novel_mir3358	Down
		novel_mir4621	Down	novel_mir1878	Down
		novel_mir2694	Down	novel_mir2941	Down
		novel_mir4457	Down	novel_mir597	Down
		novel_mir548	Down	novel_mir4203	Down
		novel_mir582	Down	novel_mir164	Down
		novel_mir3785	Down	novel_mir1884	Down
		novel_mir2173	Down	novel_mir1519	Down
		novel_mir1570	Down	novel_mir3263	Down
		novel_mir5917	Down	novel_mir1464	Down
		novel_mir4769	Down	novel_mir804	Down
		novel_mir354	Down	novel_mir382	Down
		novel_mir2430	Down	novel_mir758	Down
		novel_mir5450	Down	novel_mir1180	Down
		novel_mir1054	Down	novel_mir2404	Down
		novel_mir1012	Down	novel_mir657	Down
		novel_mir4554	Down	novel_mir2263	Down
		novel_mir2755	Down	novel_mir1226	Down
		novel_mir4681	Down	novel_mir1570	Down
		novel_mir1589	Down	novel_mir1423	Down
		mmu-miR-6961-5p	Down	novel_mir2430	Down
		novel_mir389	Down	novel_mir1010	Down
		novel_mir3537	Down	novel_mir456	Down
		novel_mir1204	Down	novel_mir3	Down
		novel_mir1531	Down	novel_mir4105	Down
		novel_mir1348	Down	novel_mir3044	Down
		novel_mir978	Down	novel_mir2123	Down
		novel_mir4475	Down	novel_mir1204	Down
		novel_mir3797	Down	novel_mir87	Down
		novel_mir1762	Down	novel_mir3399	Down
		novel_mir127	Down	novel_mir1150	Down
		novel_mir233	Down	novel_mir2646	Down
		novel_mir347	Down	novel_mir1762	Down
		novel_mir729	Down	novel_mir6098	Down
		novel_mir6098	Down	novel_mir650	Down
		mmu-miR-1198-5p	Down	novel_mir6102	Down
		mmu-miR-320-3p	Down	novel_mir2997	Down
		novel_mir395	Down	novel_mir3840	Down
		novel_mir3438	Down	novel_mir3677	Down
		novel_mir316	Down	novel_mir3469	Down
		novel_mir2826	Down	novel_mir5226	Down
		novel_mir1246	Down
