# Supplementary material for: MicroRNAs Involved in the Therapeutic Functions of Noni (Morinda citrifolia L.) Fruit Juice in the Treatment of Acute Gouty Arthritis in Mice Induced with Monosodium Urate
Source: Foods. 2021 Jul 15;10(7):1638. doi: 10.3390/foods10071638 (PMC8308103; doi:10.3390/foods10071638)
Supplement: Supplementary file 1 [file foods-10-01638-s001.zip › Table S6.xlsx]

## Sheet: five cytokines
Control-vs-Model groups										Control-vs-noni fruit juice groups										Control-vs-Colchicine groups										Model-vs-noni fruit juic groups										Model-vs-colchicine groups
NF-kappa B signaling pathway				Toll-like receptor signaling pathway		NOD-like receptor signaling pathway				NF-kappa B signaling pathway				Toll-like receptor signaling pathway		NOD-like receptor signaling pathway				NF-kappa B signaling pathway				Toll-like receptor signaling pathway		NOD-like receptor signaling pathway				NF-kappa B signaling pathway				Toll-like receptor signaling pathway		NOD-like receptor signaling pathway				NF-kappa B signaling pathway				Toll-like receptor signaling pathway		NOD-like receptor signaling pathway
IL-1β		TNF-α		IL-6		NLRP3		MCP-1		IL-1β		TNF-α		IL-6		NLRP3		MCP-1		IL-1β		TNF-α		IL-6		NLRP3		MCP-1		IL-1β		TNF-α		IL-6		NLRP3		MCP-1		IL-1β		TNF-α		IL-6		NLRP3		MCP-1
novel_mir909	Up	novel_mir4188	Up	novel_mir4275	Up	novel_mir299	Up	novel_mir5154	Up	novel_mir530	Up	novel_mir755	Up	novel_mir2239	Up	novel_mir5889	Up	novel_mir704	Up	novel_mir461	Up	novel_mir2060	Up	novel_mir5257	Up	novel_mir5889	Up	novel_mir1670	Up	novel_mir530	Up	novel_mir755	Up	novel_mir2239	Up	novel_mir12	Up	novel_mir513	Up	novel_mir3229	Up	novel_mir3551	Up	novel_mir2722	Down	novel_mir3229	Up	novel_mir3605	Down
novel_mir5379	Up	novel_mir470	Up	mmu-miR-181b-5p	Up	novel_mir4718	Up	novel_mir5651	Up	novel_mir516	Up	novel_mir2161	Up	novel_mir5370	Up	novel_mir3328	Up	novel_mir4232	Up	novel_mir909	Up	novel_mir282	Up	novel_mir2722	Down	novel_mir463	Up	novel_mir513	Down	novel_mir2657	Up	novel_mir2161	Up	novel_mir5370	Up	novel_mir711	Up	novel_mir1860	Up	novel_mir1537	Up	novel_mir906	Up	novel_mir3671	Down	novel_mir5889	Up	novel_mir5154	Down
novel_mir516	Up	novel_mir826	Up	novel_mir5257	Up	novel_mir4007	Up	novel_mir4232	Up	novel_mir4211	Up	novel_mir4211	Up	novel_mir2929	Up	novel_mir2910	Up	novel_mir1860	Up	novel_mir773	Down	novel_mir124	Up	novel_mir4599	Down	novel_mir909	Up	novel_mir3556	Down	novel_mir480	Up	novel_mir808	Up	novel_mir4599	Up	novel_mir277	Up	novel_mir5322	Up	novel_mir2826	Up	novel_mir2060	Up	novel_mir4275	Down	novel_mir3139	Up	novel_mir5651	Down
novel_mir4546	Up	novel_mir5666	Up	novel_mir3671	Up	novel_mir280	Up	novel_mir704	Up	novel_mir941	Up	novel_mir941	Up	novel_mir1769	Up	novel_mir2954	Up	novel_mir2563	Up	novel_mir4808	Down	novel_mir691	Down	novel_mir3671	Down	novel_mir2465	Up	novel_mir488	Down	novel_mir1204	Up	novel_mir4211	Up	novel_mir2929	Up	novel_mir530	Up	novel_mir488	Up	novel_mir1377	Up	novel_mir508	Up	mmu-miR-181b-5p	Down	novel_mir711	Up	novel_mir1425	Down
novel_mir5157	Up	novel_mir3372	Up	novel_mir2722	Up	novel_mir909	Up	novel_mir4851	Up	novel_mir1384	Up	novel_mir4987	Up	novel_mir4285	Up	novel_mir945	Up	novel_mir5806	Up	novel_mir671	Down	novel_mir301	Down	novel_mir1624	Down	novel_mir277	Up	novel_mir166	Down	novel_mir4211	Up	novel_mir941	Up	novel_mir1769	Up	novel_mir2657	Up	novel_mir2563	Up	novel_mir1204	Up	novel_mir680	Up	mmu-miR-181d-5p	Down	novel_mir2826	Up	novel_mir4232	Down
novel_mir2926	Up	novel_mir4398	Up	mmu-miR-181d-5p	Up	novel_mir5076	Up	mmu-miR-214-3p	Up	novel_mir713	Up	novel_mir4989	Up	novel_mir805	Up	novel_mir5358	Up	novel_mir4023	Up	novel_mir1966	Down	novel_mir274	Down	mmu-miR-140-3p	Down	novel_mir280	Up	novel_mir3605	Down	novel_mir2826	Up	novel_mir1203	Up	novel_mir1624	Up	novel_mir2239	Up	novel_mir1871	Up	novel_mir184	Up	novel_mir1242	Up	mmu-miR-140-3p	Down	novel_mir729	Up	novel_mir704	Down
novel_mir3412	Up	novel_mir5076	Up	novel_mir4599	Down	novel_mir1072	Up	novel_mir4634	Up	novel_mir2396	Up	novel_mir3400	Up	novel_mir656	Up	novel_mir5580	Up	novel_mir2994	Up	novel_mir2657	Down	novel_mir2649	Down	mmu-miR-181d-5p	Down	novel_mir3686	Up	novel_mir5869	Down	novel_mir941	Up	novel_mir214	Up	novel_mir4275	Down	novel_mir729	Up	novel_mir5049	Up	novel_mir2519	Up	novel_mir118	Up	novel_mir5257	Down	novel_mir3919	Up	novel_mir4851	Down
novel_mir1437	Up	novel_mir1960	Up	novel_mir1624	Down	novel_mir1620	Up	novel_mir2805	Up	novel_mir4374	Up	novel_mir569	Up	novel_mir1624	Up	novel_mir3546	Up	novel_mir506	Up	novel_mir154	Down	novel_mir773	Down	IL-1β		novel_mir282	Up	novel_mir2100	Down	novel_mir1384	Up	novel_mir508	Up	mmu-miR-181d-5p	Down	novel_mir480	Up	novel_mir166	Up	novel_mir357	Up	novel_mir1853	Up	IL-1β		novel_mir12	Up	novel_mir4634	Down
novel_mir5583	Up	novel_mir370	Up	IL-1β		novel_mir1062	Up	novel_mir588	Up	novel_mir2338	Up	novel_mir578	Up	novel_mir4599	Up	novel_mir4239	Up	novel_mir5860	Up	novel_mir480	Down	novel_mir115	Down	TNF-α		novel_mir169	Up	novel_mir1873	Down	novel_mir155	Up	novel_mir1894	Up	mmu-miR-181b-5p	Down	novel_mir3516	Up	novel_mir5806	Up	novel_mir1744	Down	novel_mir124	Up	TNF-α		novel_mir2465	Up	novel_mir2805	Down
novel_mir461	Up	novel_mir892	Up	TNF-α		novel_mir3686	Up	novel_mir1670	Up	novel_mir2398	Up	novel_mir2352	Up	mmu-miR-181d-5p	Down	novel_mir5632	Up	novel_mir2450	Up	novel_mir496	Down	novel_mir482	Down			novel_mir3139	Up	novel_mir4666	Down	novel_mir2426	Up	novel_mir448	Up	novel_mir2722	Down	novel_mir1626	Up	novel_mir4023	Up	novel_mir1750	Down	novel_mir4033	Up			novel_mir3771	Up	novel_mir588	Down
mmu-miR-874-3p	Up	novel_mir1585	Up			novel_mir2366	Up	novel_mir3605	Up	novel_mir461	Up	novel_mir5333	Up	novel_mir2722	Down	novel_mir3686	Up	novel_mir331	Up	novel_mir1733	Down	novel_mir1450	Down			novel_mir691	Down	novel_mir1871	Down	novel_mir361	Up	novel_mir2123	Up	novel_mir5257	Down	novel_mir2826	Up	novel_mir2994	Up	novel_mir5379	Down	novel_mir5262	Up			novel_mir1004	Up	novel_mir1670	Down
novel_mir2140	Up	novel_mir4452	Up			novel_mir5447	Up	novel_mir1425	Up	novel_mir244	Up	novel_mir4797	Up	mmu-miR-140-3p	Down	novel_mir4948	Up	novel_mir746	Up	novel_mir4446	Down	novel_mir1203	Down			novel_mir301	Down	novel_mir1209	Down	novel_mir184	Up	novel_mir2423	Up	novel_mir3671	Down	novel_mir1023	Up	novel_mir2100	Up	novel_mir516	Down	novel_mir282	Up			novel_mir169	Up	mmu-miR-16-5p	Down
novel_mir397	Up	novel_mir4479	Up			novel_mir794	Up	novel_mir513	Down	novel_mir559	Up	novel_mir2236	Up	IL-1β		novel_mir1440	Up	novel_mir5154	Up	novel_mir1006	Down	novel_mir5822	Down			novel_mir274	Down	novel_mir5322	Down	novel_mir713	Up	novel_mir1242	Up	mmu-miR-140-3p	Down	novel_mir317	Up	novel_mir506	Up	novel_mir4546	Down	novel_mir1814	Down			novel_mir463	Up	mmu-miR-214-3p	Down
novel_mir764	Up	novel_mir243	Up			novel_mir4945	Up	novel_mir3556	Down	novel_mir5066	Up	novel_mir1342	Up	TNF-α		novel_mir939	Up	novel_mir4630	Up	novel_mir2426	Down	novel_mir1403	Down			novel_mir410	Down	novel_mir601	Down	novel_mir2396	Up	novel_mir3322	Up	novel_mir4285	Up	novel_mir2426	Up	novel_mir5860	Up	novel_mir4808	Down	novel_mir4188	Down			novel_mir2132	Up
novel_mir1744	Up	novel_mir1661	Up			novel_mir4275	Up	novel_mir488	Down	novel_mir423	Up	novel_mir1452	Up			novel_mir1526	Up	novel_mir5382	Up	novel_mir2838	Down	novel_mir2477	Down			novel_mir115	Down	novel_mir2460	Down	novel_mir1377	Up	novel_mir482	Up	novel_mir805	Up	novel_mir1183	Up	novel_mir2450	Up	novel_mir3861	Down	novel_mir470	Down			novel_mir282	Up
mmu-miR-125a-5p	Up	novel_mir2703	Up			novel_mir109	Up	novel_mir166	Down	novel_mir4764	Up	novel_mir4754	Up			novel_mir4502	Up	novel_mir3961	Up	novel_mir155	Down	novel_mir997	Down			novel_mir3516	Down	novel_mir1648	Down	mmu-miR-5114	Up	novel_mir4989	Up	novel_mir656	Up	novel_mir1894	Up	novel_mir331	Up	novel_mir454	Down	novel_mir227	Down			novel_mir406	Up
novel_mir1750	Up	novel_mir4501	Up			novel_mir5792	Up	novel_mir5869	Down	novel_mir1313	Up	novel_mir1610	Up			novel_mir3323	Up	novel_mir5651	Up	novel_mir3893	Down	novel_mir488	Down			novel_mir1294	Down	novel_mir2905	Down	novel_mir671	Up	novel_mir2110	Up	IL-1β		novel_mir843	Up	novel_mir746	Up	novel_mir5157	Down	novel_mir826	Down			novel_mir127	Up
mmu-miR-125b-5p	Up	novel_mir964	Up			novel_mir5180	Up	novel_mir2100	Down	novel_mir1402	Up	novel_mir1764	Up			novel_mir5940	Up	novel_mir5776	Up	novel_mir225	Down	novel_mir3745	Down			novel_mir973	Down	novel_mir5049	Down	novel_mir4374	Up	novel_mir509	Up	TNF-α		novel_mir361	Up	novel_mir4630	Up	novel_mir2926	Down	novel_mir5666	Down			novel_mir299	Down
novel_mir3861	Up	novel_mir1662	Up			novel_mir3952	Up	novel_mir1873	Down	novel_mir2140	Up	novel_mir2767	Up			novel_mir4369	Up	novel_mir1852	Up	novel_mir4058	Down	novel_mir190	Down			novel_mir164	Down	novel_mir1425	Down	novel_mir2338	Up	novel_mir3400	Up			novel_mir713	Up	novel_mir5382	Up	novel_mir3412	Down	novel_mir3372	Down			novel_mir4718	Down
novel_mir454	Up	novel_mir465	Up			novel_mir1961	Up	novel_mir4666	Down	novel_mir2469	Up	novel_mir4012	Up			novel_mir2704	Up	novel_mir5530	Up	novel_mir361	Down	novel_mir1889	Down			novel_mir322	Down	novel_mir197	Down	novel_mir2398	Up	novel_mir569	Up			novel_mir2305	Up	novel_mir3961	Up	novel_mir1437	Down	novel_mir3141	Down			novel_mir646	Down
novel_mir3229	Down	novel_mir458	Up			novel_mir1556	Up	novel_mir1871	Down	novel_mir5540	Up	novel_mir460	Up			novel_mir299	Up	novel_mir2307	Up	novel_mir3861	Down	novel_mir160	Down			novel_mir646	Down	mmu-miR-16-5p	Down	novel_mir244	Up	novel_mir1468	Up			novel_mir1760	Up	novel_mir5776	Up	novel_mir773	Down	novel_mir4398	Down			novel_mir227	Down
novel_mir2826	Down	novel_mir546	Up			novel_mir4966	Up	novel_mir1209	Down	novel_mir1137	Up	novel_mir2364	Up			novel_mir4816	Up	novel_mir4457	Up	novel_mir4312	Down	novel_mir453	Down			novel_mir2298	Down	novel_mir1011	Down	novel_mir559	Up	novel_mir578	Up			novel_mir446	Up	novel_mir1852	Up	novel_mir5583	Down	novel_mir5076	Down			novel_mir4007	Down
novel_mir1204	Down	novel_mir6088	Up			novel_mir4369	Up	novel_mir5322	Down	novel_mir2119	Up	novel_mir1662	Up			novel_mir4017	Up	novel_mir1670	Up	novel_mir1249	Down	novel_mir1989	Down			novel_mir1488	Down			novel_mir1249	Up	novel_mir1632	Up			novel_mir439	Up	novel_mir5530	Up	mmu-miR-874-3p	Down	novel_mir1960	Down			novel_mir4050	Down
novel_mir1537	Down	novel_mir3282	Up			novel_mir463	Up	novel_mir601	Down	novel_mir4478	Up	novel_mir698	Up			novel_mir3277	Up	novel_mir1425	Up	novel_mir1574	Down	novel_mir1632	Down			novel_mir1749	Down			novel_mir5066	Up	novel_mir2352	Up			novel_mir4507	Up	novel_mir2307	Up	novel_mir2140	Down	novel_mir370	Down			novel_mir5076	Down
novel_mir671	Down	novel_mir1856	Up			novel_mir1154	Up	novel_mir2460	Down	novel_mir1437	Up	novel_mir6081	Up			novel_mir1556	Up	novel_mir5049	Up	novel_mir454	Down	novel_mir1579	Down			novel_mir1403	Down			novel_mir1733	Up	novel_mir5333	Up			novel_mir3400	Up	novel_mir5869	Up	novel_mir397	Down	novel_mir1821	Down			novel_mir4663	Down
novel_mir1966	Down	novel_mir1794	Up			novel_mir3099	Up	novel_mir1648	Down	novel_mir5317	Up	novel_mir5239	Up			novel_mir4192	Up	novel_mir5322	Up	novel_mir2112	Down	novel_mir808	Down			novel_mir4663	Down			novel_mir423	Up	novel_mir301	Up			novel_mir898	Up	novel_mir4457	Up	mmu-miR-125b-5p	Down	novel_mir532	Down			novel_mir1072	Down
novel_mir2657	Down	novel_mir5237	Up			novel_mir227	Up	novel_mir2905	Down	novel_mir1157	Up	novel_mir2227	Up			novel_mir6118	Up	novel_mir1871	Up	novel_mir409	Down	novel_mir6093	Down			novel_mir3606	Down			novel_mir4764	Up	novel_mir906	Up			novel_mir301	Up	novel_mir704	Up	mmu-miR-125a-5p	Down	novel_mir4733	Down			novel_mir238	Down
novel_mir154	Down	novel_mir1834	Up			novel_mir282	Up	novel_mir5049	Down	novel_mir3370	Up	novel_mir2760	Up			novel_mir1626	Up	novel_mir3556	Down	novel_mir3611	Down	novel_mir1955	Down			novel_mir997	Down			novel_mir1313	Up	novel_mir3507	Up			novel_mir345	Up	novel_mir4232	Up	novel_mir764	Down	novel_mir3752	Down			novel_mir245	Down
novel_mir480	Down	novel_mir2272	Up			novel_mir238	Up	novel_mir197	Down	novel_mir5685	Up	novel_mir2156	Up			novel_mir1565	Up	novel_mir4666	Down	novel_mir2043	Down	novel_mir1821	Down			novel_mir333	Down			novel_mir1402	Up	novel_mir4797	Up			novel_mir1218	Up	novel_mir1011	Up	novel_mir768	Down	novel_mir2649	Down			novel_mir1620	Down
novel_mir496	Up	novel_mir1458	Up			novel_mir609	Up	novel_mir1011	Down	novel_mir1582	Up	novel_mir275	Up			novel_mir1218	Up	novel_mir1209	Down	novel_mir2207	Down	novel_mir532	Down			novel_mir3627	Down			novel_mir1094	Up	novel_mir2555	Up			novel_mir236	Up	novel_mir197	Up	novel_mir909	Down	novel_mir892	Down			novel_mir3739	Down
novel_mir1733	Down	novel_mir2194	Up			novel_mir4451	Up			novel_mir3412	Up	novel_mir1458	Up			novel_mir1023	Up	novel_mir601	Down	novel_mir2099	Down	novel_mir1894	Down			novel_mir4050	Down			novel_mir768	Up	novel_mir159	Up			novel_mir820	Up	novel_mir1425	Up	novel_mir1094	Down	novel_mir1585	Down			novel_mir1062	Down
novel_mir4446	Down	novel_mir2805	Up			novel_mir3680	Up			novel_mir3575	Up	novel_mir5860	Up			novel_mir4451	Up	novel_mir2460	Down	novel_mir1744	Down	novel_mir1473	Down			novel_mir245	Down			novel_mir467	Up	novel_mir2236	Up			novel_mir1271	Up	novel_mir4851	Down	novel_mir94	Down	novel_mir4452	Down			novel_mir973	Down
novel_mir1377	Down	novel_mir588	Up			novel_mir802	Up			novel_mir5229	Up	novel_mir2932	Up			novel_mir1318	Up	novel_mir1648	Down	novel_mir1258	Down	novel_mir5058	Down			novel_mir1966	Down			novel_mir1750	Down	novel_mir488	Up			novel_mir6120	Up	mmu-miR-214-3p	Down			novel_mir2212	Down			novel_mir3606	Down
novel_mir2519	Down	novel_mir4987	Up			novel_mir646	Up			novel_mir939	Up	novel_mir3897	Up			novel_mir1129	Up	novel_mir2905	Down	novel_mir1750	Down	novel_mir1466	Down			novel_mir2657	Down			novel_mir909	Down	novel_mir680	Up			novel_mir1482	Up	novel_mir4634	Down			novel_mir4479	Down			novel_mir691	Down
novel_mir1006	Down	novel_mir4485	Up			mmu-miR-486b-3p	Up			novel_mir2926	Up	novel_mir2275	Up			novel_mir3680	Up	novel_mir1873	Down	novel_mir768	Down	novel_mir901	Down			novel_mir480	Down			novel_mir5379	Down	novel_mir1342	Up			novel_mir4797	Up	novel_mir2805	Down			novel_mir454	Down			novel_mir431	Down
novel_mir2426	Down	mmu-miR-540-3p	Up			novel_mir4050	Up			novel_mir5530	Up	novel_mir370	Up			novel_mir446	Up	mmu-miR-16-5p	Down	mmu-miR-5114	Down	novel_mir4554	Down			novel_mir3800	Down			novel_mir4546	Down	novel_mir1452	Up			novel_mir1294	Up	novel_mir588	Down			novel_mir691	Down			novel_mir609	Down
novel_mir2838	Down	novel_mir1814	Up			novel_mir3739	Up			novel_mir1432	Up	novel_mir5193	Up			novel_mir361	Up	novel_mir5869	Down	novel_mir1204	Down	novel_mir3141	Down			novel_mir496	Down			novel_mir5157	Down	novel_mir4754	Up			novel_mir4576	Up	novel_mir3605	Down			novel_mir243	Down			novel_mir410	Down
novel_mir155	Down	novel_mir764	Up			mmu-miR-486a-3p	Up			novel_mir1781	Up	novel_mir3372	Up			novel_mir2426	Up	novel_mir197	Down	novel_mir94	Down	novel_mir685	Down			novel_mir1241	Down			mmu-miR-125a-5p	Down	novel_mir1610	Up			novel_mir3416	Up	novel_mir5154	Down			novel_mir1661	Down			novel_mir2366	Down
novel_mir3893	Down	novel_mir596	Up			novel_mir301	Down			novel_mir764	Up	novel_mir3013	Up			novel_mir1482	Up			novel_mir357	Down	novel_mir3752	Down			novel_mir1191	Down			novel_mir5583	Down	novel_mir1764	Up			novel_mir1318	Up	novel_mir1670	Down			novel_mir2287	Down			novel_mir3680	Down
novel_mir225	Down	mmu-miR-125a-5p	Up			novel_mir12	Down			novel_mir633	Up	novel_mir331	Up			novel_mir2298	Up			novel_mir633	Down	novel_mir659	Down			novel_mir6034	Down			mmu-miR-874-3p	Down	novel_mir160	Up			novel_mir497	Up	mmu-miR-16-5p	Down			novel_mir2703	Down			novel_mir1565	Down
novel_mir4058	Down	novel_mir1150	Up			novel_mir711	Down			novel_mir184	Up	novel_mir728	Up			novel_mir2657	Up			novel_mir467	Down	novel_mir2712	Down			novel_mir1992	Down			novel_mir397	Down	novel_mir2767	Up			novel_mir2073	Up	novel_mir5651	Down			novel_mir4501	Down			novel_mir5447	Down
novel_mir361	Down	mmu-miR-125b-5p	Up			novel_mir3229	Down			novel_mir361	Up	novel_mir881	Up			novel_mir609	Up			novel_mir1094	Down	novel_mir3322	Down			novel_mir6093	Down			mmu-miR-125b-5p	Down	novel_mir4012	Up			novel_mir2687	Up					novel_mir1889	Down			novel_mir794	Down
novel_mir4312	Down	novel_mir227	Up			novel_mir2826	Down			mmu-miR-5114	Up	novel_mir826	Up			novel_mir1894	Up			novel_mir2826	Down	novel_mir6026	Down			novel_mir2163	Down			novel_mir1744	Down	novel_mir118	Up			novel_mir3347	Up					novel_mir1425	Down			novel_mir1403	Down
novel_mir1249	Down	novel_mir282	Up			novel_mir729	Down			novel_mir1094	Up	novel_mir4485	Up			novel_mir883	Up			mmu-miR-125b-5p	Down	novel_mir902	Down			novel_mir1119	Down			novel_mir764	Down	novel_mir460	Up			novel_mir677	Up					novel_mir964	Down			novel_mir4945	Down
novel_mir1574	Down	novel_mir3141	Up			novel_mir3516	Down			novel_mir155	Up	novel_mir964	Up			novel_mir898	Up			novel_mir2519	Down	novel_mir1078	Down			novel_mir5294	Down			novel_mir2926	Down	novel_mir2364	Up			novel_mir3425	Up					novel_mir1403	Down			novel_mir292	Down
novel_mir184	Down	novel_mir4733	Up			novel_mir1294	Down			novel_mir2426	Up	novel_mir3634	Up			novel_mir4138	Up					novel_mir1373	Down			novel_mir3739	Down			novel_mir4808	Down	novel_mir698	Up			novel_mir1600	Up					novel_mir212	Down			novel_mir4275	Down
novel_mir2112	Down	novel_mir212	Up			novel_mir3919	Down			novel_mir2657	Up	novel_mir5382	Up			novel_mir480	Up					novel_mir3938	Down			novel_mir3902	Down			novel_mir2469	Up	novel_mir6081	Up			novel_mir3654	Up					novel_mir5822	Down			novel_mir109	Down
novel_mir409	Down	novel_mir3387	Up			novel_mir345	Down			novel_mir480	Up	novel_mir5594	Up			novel_mir1381	Up					novel_mir2212	Down			novel_mir3416	Down			novel_mir5540	Up	novel_mir5239	Up			novel_mir1690	Up					novel_mir1662	Down			novel_mir5792	Down
novel_mir3611	Down	novel_mir3752	Up			novel_mir164	Down			novel_mir1377	Up	novel_mir823	Up			novel_mir5481	Up					novel_mir199	Down			novel_mir3654	Down			novel_mir496	Up	novel_mir2227	Up			novel_mir5263	Up					novel_mir1113	Down			novel_mir5180	Down
mmu-miR-5114	Down	novel_mir1821	Up			novel_mir1488	Down			novel_mir1249	Up	novel_mir1276	Up			novel_mir1050	Up					novel_mir3530	Down			novel_mir580	Down			novel_mir1137	Up	novel_mir2760	Up			novel_mir2912	Up					novel_mir465	Down			novel_mir3952	Down
novel_mir2043	Down	novel_mir532	Up			novel_mir1749	Down			novel_mir1537	Down	novel_mir2573	Up			novel_mir487	Up					novel_mir1519	Down			novel_mir1894	Down			novel_mir3229	Up	novel_mir1853	Up			novel_mir1191	Up					novel_mir773	Down			novel_mir2163	Down
novel_mir2207	Down	novel_mir1425	Up			novel_mir997	Down			novel_mir1966	Down	novel_mir465	Up			novel_mir7	Up					novel_mir278	Down			novel_mir1565	Down			novel_mir2119	Up	novel_mir4209	Up			novel_mir4311	Up					novel_mir648	Down			novel_mir1961	Down
novel_mir2099	Down	novel_mir2287	Up			novel_mir3627	Down			novel_mir154	Down	novel_mir199	Down			novel_mir3770	Down					novel_mir601	Down			novel_mir4554	Down			novel_mir4478	Up	novel_mir2156	Up			novel_mir1050	Up					novel_mir458	Down			novel_mir1556	Down
novel_mir1258	Down	novel_mir454	Up			novel_mir1966	Down			novel_mir4446	Down	novel_mir3530	Down			novel_mir3919	Down					novel_mir648	Down			novel_mir1290	Down			novel_mir2519	Up	novel_mir275	Up			novel_mir460	Up					novel_mir3387	Down			novel_mir4144	Down
novel_mir357	Down	novel_mir2212	Up			novel_mir2657	Down			novel_mir1006	Down	novel_mir601	Down			novel_mir646	Down					novel_mir269	Down			novel_mir2426	Down			novel_mir4058	Up	novel_mir5860	Up			novel_mir1812	Up					novel_mir3817	Down			novel_mir4966	Down
novel_mir467	Down	mmu-miR-1839-5p	Up			novel_mir480	Down			novel_mir2838	Down	novel_mir269	Down			novel_mir1488	Down					novel_mir5278	Down			novel_mir2516	Down			novel_mir5317	Up	novel_mir2932	Up			novel_mir3361	Up					novel_mir453	Down			novel_mir4369	Down
novel_mir773	Down	novel_mir301	Down			novel_mir3800	Down			novel_mir3893	Down	novel_mir1168	Down			novel_mir3627	Down					novel_mir2555	Down			novel_mir134	Down			novel_mir1157	Up	novel_mir3897	Up			novel_mir425	Up					novel_mir546	Down			novel_mir322	Down
novel_mir94	Down	novel_mir3551	Down			novel_mir496	Down			novel_mir225	Down	novel_mir90	Down			novel_mir1966	Down					novel_mir1168	Down			novel_mir1213	Down			novel_mir4312	Up	novel_mir2275	Up			novel_mir495	Up					novel_mir6088	Down			novel_mir274	Down
novel_mir633	Down	novel_mir1242	Down			novel_mir1241	Down			novel_mir1574	Down	novel_mir2032	Down			novel_mir6093	Down					novel_mir90	Down			novel_mir2748	Down			novel_mir3370	Up	novel_mir835	Up			novel_mir6064	Up					novel_mir3282	Down			novel_mir1154	Down
novel_mir4808	Down	novel_mir482	Down			novel_mir1191	Down			novel_mir2112	Down	novel_mir2273	Down			novel_mir2163	Down					novel_mir2032	Down			novel_mir4144	Down			novel_mir5685	Up	novel_mir1458	Up			novel_mir487	Up					novel_mir2167	Down			novel_mir2298	Down
novel_mir768	Down	novel_mir316	Down			novel_mir6034	Down			novel_mir409	Down	novel_mir310	Down			novel_mir1119	Down					novel_mir454	Down			novel_mir898	Down			novel_mir1582	Up	novel_mir4485	Up			novel_mir883	Up					novel_mir1856	Down			novel_mir1773	Down
		novel_mir680	Down			novel_mir1992	Down			novel_mir3611	Down	novel_mir157	Down			novel_mir5294	Down					novel_mir2273	Down			novel_mir431	Down			novel_mir3575	Up	novel_mir1403	Up			novel_mir241	Up					novel_mir262	Down			novel_mir2748	Down
		novel_mir1203	Down			novel_mir6093	Down			novel_mir2207	Down	novel_mir2167	Down			novel_mir3739	Down					novel_mir509	Down			novel_mir361	Down			novel_mir5229	Up	novel_mir2997	Up			novel_mir4282	Up					novel_mir659	Down			novel_mir333	Down
		novel_mir2123	Down			novel_mir1119	Down			novel_mir2099	Down	novel_mir2287	Down			novel_mir3902	Down					novel_mir4209	Down			novel_mir2615	Down			novel_mir939	Up	novel_mir1425	Up			novel_mir5461	Up					novel_mir1579	Down			novel_mir115	Down
		novel_mir118	Down			novel_mir5294	Down			novel_mir1258	Down	novel_mir2099	Down			novel_mir3139	Down					novel_mir310	Down			novel_mir269	Down			novel_mir5530	Up	novel_mir4188	Down			novel_mir1241	Up					novel_mir1450	Down			novel_mir3099	Down
		novel_mir997	Down			novel_mir3902	Down			novel_mir1750	Down	novel_mir3804	Down			novel_mir580	Down					novel_mir157	Down			mmu-miR-709	Down			novel_mir1432	Up	novel_mir470	Down			novel_mir6034	Up					novel_mir1794	Down			mmu-miR-486b-3p	Down
		novel_mir906	Down			novel_mir3416	Down			novel_mir3229	Down	novel_mir4733	Down			novel_mir134	Down					novel_mir1773	Down			novel_mir1073	Down			novel_mir2043	Up	novel_mir5666	Down			novel_mir3599	Up					novel_mir5237	Down			mmu-miR-423-5p	Down
		novel_mir448	Down			novel_mir3654	Down			novel_mir4808	Down	novel_mir1295	Down			novel_mir269	Down					novel_mir2167	Down			novel_mir1574	Down			novel_mir633	Up	novel_mir4398	Down			novel_mir4804	Up					novel_mir1834	Down			novel_mir802	Down
		novel_mir488	Down			novel_mir3139	Down			novel_mir467	Down	novel_mir5764	Down			novel_mir1574	Down					novel_mir2110	Down			novel_mir1050	Down			novel_mir773	Up	novel_mir5076	Down			novel_mir2020	Up					novel_mir2272	Down			novel_mir280	Down
		novel_mir3745	Down			novel_mir580	Down			novel_mir357	Down	novel_mir2780	Down			novel_mir2530	Down					novel_mir1130	Down			novel_mir2145	Down			novel_mir357	Up	novel_mir1920	Down			novel_mir4785	Up					novel_mir787	Down			novel_mir768	Down
		novel_mir190	Down			novel_mir1894	Down			novel_mir94	Down	novel_mir4526	Down			novel_mir5227	Down					novel_mir2287	Down			novel_mir2155	Down			novel_mir2140	Up	novel_mir4733	Down			novel_mir5400	Up					novel_mir1458	Down			novel_mir4451	Down
		novel_mir2361	Down			novel_mir4554	Down					novel_mir2133	Down			novel_mir2068	Down					novel_mir771	Down			novel_mir2530	Down			novel_mir461	Up	novel_mir892	Down			novel_mir1073	Up					novel_mir2194	Down			novel_mir171	Down
		novel_mir160	Down			novel_mir1290	Down					novel_mir5116	Down			novel_mir1253	Down					novel_mir262	Down			novel_mir5227	Down					novel_mir1585	Down			novel_mir4619	Up					novel_mir3804	Down			novel_mir909	Down
		novel_mir1989	Down			novel_mir2426	Down					novel_mir1875	Down			novel_mir158	Down					novel_mir2099	Down			novel_mir1482	Down					novel_mir4452	Down			novel_mir3069	Up					novel_mir2805	Down			mmu-miR-486a-3p	Down
		novel_mir1632	Down			novel_mir2516	Down					novel_mir5634	Down			novel_mir5764	Down					novel_mir1113	Down			novel_mir238	Down					novel_mir2212	Down			novel_mir5394	Up					novel_mir2477	Down			mmu-miR-133a-3p	Down
		novel_mir808	Down			novel_mir134	Down					mmu-miR-3102-5p.2-5p	Down			novel_mir292	Down					novel_mir3804	Down			novel_mir1773	Down					novel_mir1661	Down			novel_mir322	Up					novel_mir274	Down			novel_mir3770	Down
		novel_mir6093	Down			novel_mir1213	Down					novel_mir2293	Down			novel_mir4236	Down					novel_mir1814	Down			novel_mir487	Down					novel_mir2287	Down			novel_mir1154	Up					novel_mir588	Down			novel_mir87	Down
		novel_mir1955	Down			novel_mir898	Down					novel_mir4399	Down			novel_mir3202	Down					novel_mir227	Down			novel_mir2068	Down					novel_mir2703	Down			novel_mir1403	Up					novel_mir1773	Down			novel_mir1129	Down
		novel_mir1894	Down			novel_mir361	Down					novel_mir2639	Down			novel_mir5910	Down					novel_mir4733	Down			novel_mir1253	Down					novel_mir4501	Down			novel_mir4945	Up					novel_mir4987	Down			novel_mir3686	Down
		novel_mir1473	Down			novel_mir2615	Down					novel_mir3387	Down			novel_mir2200	Down					novel_mir1295	Down			novel_mir540	Down					mmu-miR-125a-5p	Down			novel_mir768	Up					novel_mir1466	Down			novel_mir1489	Down
		novel_mir5058	Down			novel_mir269	Down					novel_mir140	Down			novel_mir6149	Down					novel_mir5764	Down			novel_mir158	Down					novel_mir458	Down			novel_mir4718	Down					novel_mir4485	Down			novel_mir3989	Down
		novel_mir901	Down			novel_mir1073	Down					novel_mir2649	Down			novel_mir6160	Down					novel_mir2780	Down			novel_mir446	Down					novel_mir3387	Down			novel_mir646	Down					novel_mir115	Down			novel_mir2079	Down
		novel_mir4554	Down			novel_mir1574	Down					novel_mir3551	Down			novel_mir1741	Down					novel_mir4526	Down			novel_mir4303	Down					novel_mir546	Down			novel_mir4007	Down					novel_mir1130	Down			novel_mir395	Down
		novel_mir685	Down			novel_mir1050	Down					novel_mir301	Down			novel_mir3494	Down					novel_mir787	Down			novel_mir227	Down					novel_mir6088	Down			novel_mir909	Down					mmu-miR-540-3p	Down			novel_mir3609	Down
		novel_mir2712	Down			novel_mir2145	Down					novel_mir316	Down			novel_mir1749	Down					novel_mir2133	Down			novel_mir5764	Down					novel_mir3282	Down			novel_mir3770	Down					novel_mir1150	Down			novel_mir1559	Down
		novel_mir3322	Down			novel_mir2155	Down					novel_mir87	Down			novel_mir171	Down					novel_mir5116	Down			novel_mir1317	Down					novel_mir2167	Down			novel_mir5076	Down					mmu-miR-125b-5p	Down
		novel_mir6026	Down			novel_mir2530	Down					mmu-miR-149-5p	Down			novel_mir3609	Down					novel_mir1425	Down			novel_mir292	Down					novel_mir1856	Down			novel_mir3739	Down					novel_mir596	Down
		novel_mir902	Down			novel_mir5227	Down					novel_mir5519	Down			novel_mir2132	Down					novel_mir1875	Down			novel_mir5481	Down					novel_mir1450	Down			novel_mir2366	Down					novel_mir140	Down
		novel_mir1078	Down			novel_mir1482	Down					novel_mir4554	Down			novel_mir3229	Down					novel_mir2423	Down			novel_mir1023	Down					novel_mir1794	Down			novel_mir5447	Down					mmu-miR-125a-5p	Down
		novel_mir1373	Down			novel_mir487	Down					novel_mir115	Down			novel_mir301	Down					novel_mir5634	Down			novel_mir3332	Down					novel_mir2194	Down			novel_mir794	Down					novel_mir764	Down
		novel_mir3938	Down			novel_mir2068	Down					mmu-miR-1839-5p	Down			novel_mir164	Down					novel_mir1468	Down			novel_mir883	Down					novel_mir3804	Down			novel_mir292	Down					mmu-miR-1839-5p	Down
		novel_mir199	Down			novel_mir1253	Down					novel_mir99	Down			novel_mir87	Down					novel_mir2293	Down			novel_mir3202	Down					novel_mir2805	Down			novel_mir4275	Down					novel_mir87	Down
		novel_mir3530	Down			novel_mir540	Down					novel_mir997	Down			novel_mir406	Down					novel_mir3507	Down			novel_mir5910	Down					novel_mir588	Down			novel_mir4236	Down					novel_mir1863	Down
		novel_mir1519	Down			novel_mir158	Down					novel_mir3589	Down			mmu-miR-133a-3p	Down					novel_mir4399	Down			novel_mir2200	Down					mmu-miR-540-3p	Down			novel_mir5792	Down					novel_mir650	Down
		novel_mir278	Down			novel_mir446	Down					novel_mir1428	Up			novel_mir4554	Down					novel_mir835	Down			novel_mir3680	Down					novel_mir140	Down			novel_mir5180	Down					mmu-miR-149-5p	Down
		novel_mir601	Down			novel_mir4303	Down					novel_mir5164	Up			novel_mir115	Down					novel_mir4769	Down			novel_mir1343	Down					novel_mir1814	Down			novel_mir3952	Down					novel_mir1920	Down
		novel_mir269	Down			novel_mir5764	Down					novel_mir2699	Up			novel_mir802	Down					novel_mir2639	Down			novel_mir290	Down					mmu-miR-125b-5p	Down			novel_mir2163	Down					novel_mir99	Down
		novel_mir5278	Down			novel_mir1317	Down					novel_mir1765	Up			novel_mir333	Down					novel_mir214	Down			novel_mir6149	Down					novel_mir282	Down			novel_mir4966	Down					novel_mir2079	Down
		novel_mir2555	Down			novel_mir5481	Down					novel_mir1943	Up			novel_mir3771	Down					novel_mir3817	Down			novel_mir4138	Down					novel_mir1150	Down			novel_mir463	Down
		novel_mir1168	Down			novel_mir1023	Down					novel_mir1834	Up			mmu-miR-486b-3p	Down					novel_mir212	Down			novel_mir609	Down					novel_mir1960	Down			novel_mir3099	Down
		novel_mir90	Down			novel_mir3332	Down					novel_mir404	Up			novel_mir322	Down					novel_mir622	Down			novel_mir6160	Down					novel_mir2649	Down			novel_mir299	Down
		novel_mir2032	Down			novel_mir883	Down					novel_mir4061	Up			novel_mir997	Down					novel_mir99	Down			novel_mir1741	Down					novel_mir826	Down			novel_mir282	Down
		novel_mir2273	Down			novel_mir3202	Down					novel_mir5229	Up			novel_mir1213	Down					novel_mir87	Down			novel_mir171	Down					novel_mir227	Down			novel_mir802	Down
		novel_mir509	Down			novel_mir5910	Down					novel_mir1852	Up			novel_mir410	Down					novel_mir140	Down			novel_mir87	Down					mmu-miR-1839-5p	Down			mmu-miR-486b-3p	Down
		novel_mir4209	Down			novel_mir2200	Down					novel_mir4479	Up			novel_mir1294	Down					novel_mir316	Down			novel_mir768	Down					novel_mir3372	Down			novel_mir227	Down
		novel_mir310	Down			novel_mir1343	Down					novel_mir3497	Up			novel_mir973	Down					novel_mir2123	Down			novel_mir3494	Down					novel_mir243	Down			mmu-miR-133a-3p	Down
		novel_mir157	Down			novel_mir290	Down					novel_mir1878	Up			novel_mir3800	Down					novel_mir1920	Down			novel_mir12	Down					mmu-miR-149-5p	Down			novel_mir1072	Down
		novel_mir2110	Down			novel_mir6149	Down					novel_mir1960	Up			novel_mir277	Up					novel_mir650	Down			mmu-miR-423-5p	Down					novel_mir4479	Down			novel_mir238	Down
		novel_mir771	Down			novel_mir4138	Down					novel_mir5237	Up			novel_mir530	Up					novel_mir118	Down			novel_mir4105	Down					novel_mir532	Down			novel_mir431	Down
		novel_mir2099	Down			novel_mir274	Down					novel_mir2526	Up			novel_mir2239	Up					novel_mir5262	Down			novel_mir3770	Down					novel_mir596	Down			mmu-miR-423-5p	Down
		novel_mir1295	Down			novel_mir4105	Down					novel_mir243	Up			novel_mir317	Up					novel_mir1242	Down			mmu-miR-486b-3p	Down					novel_mir370	Down			novel_mir2615	Up
		novel_mir1853	Down			novel_mir3771	Down					novel_mir1423	Up			novel_mir1183	Up					mmu-miR-149-5p	Down			novel_mir3609	Down					novel_mir764	Down			novel_mir540	Up
		novel_mir5764	Down			novel_mir3494	Down					novel_mir124	Up			novel_mir843	Up					novel_mir448	Down			novel_mir345	Down					novel_mir5193	Up			novel_mir77	Up
		novel_mir2780	Down			novel_mir115	Down					novel_mir764	Up			novel_mir280	Up					novel_mir1863	Down			novel_mir802	Down					novel_mir3013	Up			novel_mir3081	Up
		novel_mir4526	Down			novel_mir127	Down					novel_mir214	Up			novel_mir713	Up					mmu-miR-1839-5p	Down			novel_mir1489	Down					novel_mir331	Up			novel_mir496	Up
		novel_mir2133	Down			novel_mir691	Down					novel_mir1863	Up			novel_mir2305	Up					mmu-miR-3102-5p.2-5p	Down			novel_mir127	Down					novel_mir728	Up			novel_mir5481	Up
		novel_mir5116	Down			novel_mir1004	Down					novel_mir508	Up			novel_mir1760	Up					novel_mir633	Down			novel_mir3919	Down					novel_mir881	Up			novel_mir4285	Up
		novel_mir1875	Down			novel_mir3609	Down					novel_mir633	Up			novel_mir439	Up					novel_mir2361	Down			novel_mir1129	Down					novel_mir3634	Up			novel_mir5193	Up
		novel_mir2423	Down			novel_mir322	Down					novel_mir159	Up			novel_mir4507	Up					novel_mir680	Down			mmu-miR-133a-3p	Down					novel_mir5382	Up			novel_mir3029	Up
		novel_mir5634	Down			novel_mir2298	Down					novel_mir596	Up			novel_mir1620	Up					mmu-miR-125b-5p	Down			novel_mir395	Down					novel_mir5594	Up			novel_mir971	Up
		novel_mir1468	Down			novel_mir406	Down					novel_mir2423	Up			novel_mir4945	Up					novel_mir2079	Down			novel_mir711	Down					novel_mir823	Up			novel_mir2145	Up
		novel_mir2293	Down			novel_mir87	Down					novel_mir1468	Up			novel_mir3400	Up					novel_mir1150	Down			novel_mir7	Down					novel_mir3551	Up			novel_mir3229	Up
		novel_mir3507	Down			novel_mir171	Down					novel_mir3507	Up			novel_mir236	Up					novel_mir2997	Down			novel_mir729	Down					novel_mir1276	Up			novel_mir4138	Up
		novel_mir4399	Down			novel_mir333	Down					novel_mir1130	Up			novel_mir820	Up					novel_mir5519	Down			mmu-miR-486a-3p	Down					novel_mir2573	Up			novel_mir1317	Up
		novel_mir835	Down			novel_mir2132	Down					novel_mir1425	Up			novel_mir1271	Up					novel_mir906	Down			novel_mir3989	Down					novel_mir997	Up			novel_mir6027	Up
		novel_mir4769	Down			novel_mir410	Down					novel_mir808	Up			novel_mir6120	Up					novel_mir3551	Down			novel_mir4451	Down					novel_mir1428	Up			novel_mir1915	Up
		novel_mir508	Down			novel_mir7	Down					novel_mir2110	Up			novel_mir4797	Up									novel_mir2826	Down					novel_mir5164	Up			novel_mir2137	Up
		novel_mir274	Down			mmu-miR-709	Down					novel_mir509	Up			novel_mir4576	Up									novel_mir1381	Down					novel_mir2699	Up			novel_mir3191	Up
		novel_mir99	Down			novel_mir395	Down					novel_mir5822	Up			novel_mir497	Up									novel_mir2079	Down					novel_mir1765	Up			novel_mir1276	Up
		novel_mir5262	Down			novel_mir1381	Down					novel_mir835	Up			novel_mir2073	Up									novel_mir406	Down					novel_mir2361	Up			novel_mir997	Up
		novel_mir115	Down			novel_mir1403	Down					novel_mir787	Up			novel_mir2687	Up									Up regulated K12800: , NM_026670.4 (5.0)						novel_mir1943	Up			novel_mir5889	Up
		novel_mir691	Down			novel_mir3770	Down					novel_mir3322	Up			novel_mir3347	Up									novel_mir3530	Down					novel_mir901	Up			novel_mir3328	Up
		novel_mir773	Down			novel_mir768	Down					novel_mir1894	Up			novel_mir1062	Up									novel_mir1691	Down					novel_mir404	Up			novel_mir2910	Up
		novel_mir4033	Down			novel_mir973	Down					novel_mir453	Up			novel_mir677	Up									novel_mir1924	Down					novel_mir4061	Up			novel_mir2155	Up
		novel_mir87	Down			novel_mir1559	Up					novel_mir2555	Up			novel_mir3425	Up									novel_mir5178	Down					novel_mir1473	Up			novel_mir2954	Up
		novel_mir1450	Down			novel_mir3530	Down					novel_mir3141	Up			novel_mir1961	Up									novel_mir1559	Down					novel_mir5229	Up			novel_mir4303	Up
		novel_mir2477	Down			novel_mir1691	Down					novel_mir1113	Up			novel_mir1600	Up															novel_mir1852	Up			novel_mir945	Up
		novel_mir5519	Down			novel_mir1924	Down					novel_mir1853	Up			novel_mir1690	Up															novel_mir278	Up			novel_mir5358	Up
		novel_mir1920	Down			novel_mir5178	Down					novel_mir1150	Up			novel_mir5263	Up															novel_mir1989	Up			novel_mir5580	Up
		novel_mir633	Down									novel_mir4209	Up			novel_mir2912	Up															novel_mir5278	Up			novel_mir3546	Up
		novel_mir5822	Down									novel_mir1920	Down			novel_mir4311	Up															novel_mir316	Up			novel_mir4239	Up
		novel_mir3589	Down									novel_mir1450	Down			novel_mir109	Up															novel_mir771	Up			novel_mir5632	Up
		novel_mir1466	Down									novel_mir3745	Down			novel_mir460	Up															novel_mir3497	Up			novel_mir3800	Up
		novel_mir2649	Down									novel_mir190	Down			novel_mir1812	Up															novel_mir1878	Up			novel_mir4948	Up
		novel_mir1403	Down									novel_mir6093	Down			novel_mir3361	Up															novel_mir622	Up			novel_mir1440	Up
												novel_mir1955	Down			novel_mir425	Up															novel_mir1519	Up			novel_mir939	Up
												novel_mir5058	Down			novel_mir495	Up															novel_mir2526	Up			novel_mir1526	Up
												novel_mir685	Down			novel_mir6064	Up															novel_mir633	Up			novel_mir1992	Up
												novel_mir2712	Down			novel_mir241	Up															novel_mir274	Up			novel_mir4502	Up
												novel_mir6026	Down			novel_mir4282	Up															novel_mir1863	Up			novel_mir3323	Up
												novel_mir902	Down			novel_mir5461	Up															novel_mir5262	Up			novel_mir5940	Up
												novel_mir1078	Down			novel_mir3599	Up															novel_mir691	Up			novel_mir290	Up
												novel_mir1373	Down			novel_mir4804	Up															novel_mir773	Up			novel_mir2516	Up
												novel_mir3938	Down			novel_mir2020	Up															novel_mir124	Up			novel_mir1290	Up
												novel_mir2212	Down			novel_mir4785	Up															novel_mir5822	Up			novel_mir1343	Up
																novel_mir5400	Up															novel_mir99	Up			novel_mir2704	Up
																novel_mir4619	Up															novel_mir1130	Up			novel_mir4816	Up
																novel_mir3069	Up															novel_mir4987	Up			novel_mir164	Up
																novel_mir5394	Up															novel_mir2477	Up			novel_mir4017	Up
																novel_mir1154	Up															novel_mir453	Up			novel_mir3277	Up
																novel_mir77	Up															novel_mir1466	Up			novel_mir4192	Up
																novel_mir3081	Up															novel_mir115	Up			novel_mir6118	Up
																novel_mir4285	Up															novel_mir4033	Up			novel_mir1213	Up
																novel_mir5193	Up															novel_mir787	Up			novel_mir4105	Up
																novel_mir3029	Up																			novel_mir2298	Up
																novel_mir971	Up																			novel_mir274	Up
																novel_mir6027	Up																			novel_mir1004	Up
																novel_mir1915	Up																			novel_mir691	Up
																novel_mir2137	Up																			novel_mir127	Up
																novel_mir3191	Up																			novel_mir7	Up
																novel_mir1072	Up																			novel_mir1565	Up
																novel_mir1276	Up																			novel_mir1381	Up
																novel_mir1691	Up																			novel_mir1129	Up
																novel_mir3530	Down																			novel_mir3771	Up
																novel_mir1924	Down																			mmu-miR-709	Up
																novel_mir5178	Down																			novel_mir115	Up
																novel_mir1559	Down																			novel_mir2748	Up
																																				novel_mir1961	Up
																																				novel_mir1691	Up
																																				novel_mir1691	Up
[truncated: 10 more columns]
